# Supplementary material for: Ultrasound Contrast Agent Priming of Biopsy and Introducer Needles by Using a Small Syringe to Improve Needle Visibility in a Phantom Model
Source: PubMed Central journal article supplement (PMC10382408; doi:10.1007/s00270-023-03500-3), 2023-07-12
Supplement: 270_2023_3500_MOESM4_ESM.pdf [file 270_2023_3500_MOESM4_ESM.pdf]

Side-notch biopsy needle (set 1/10)

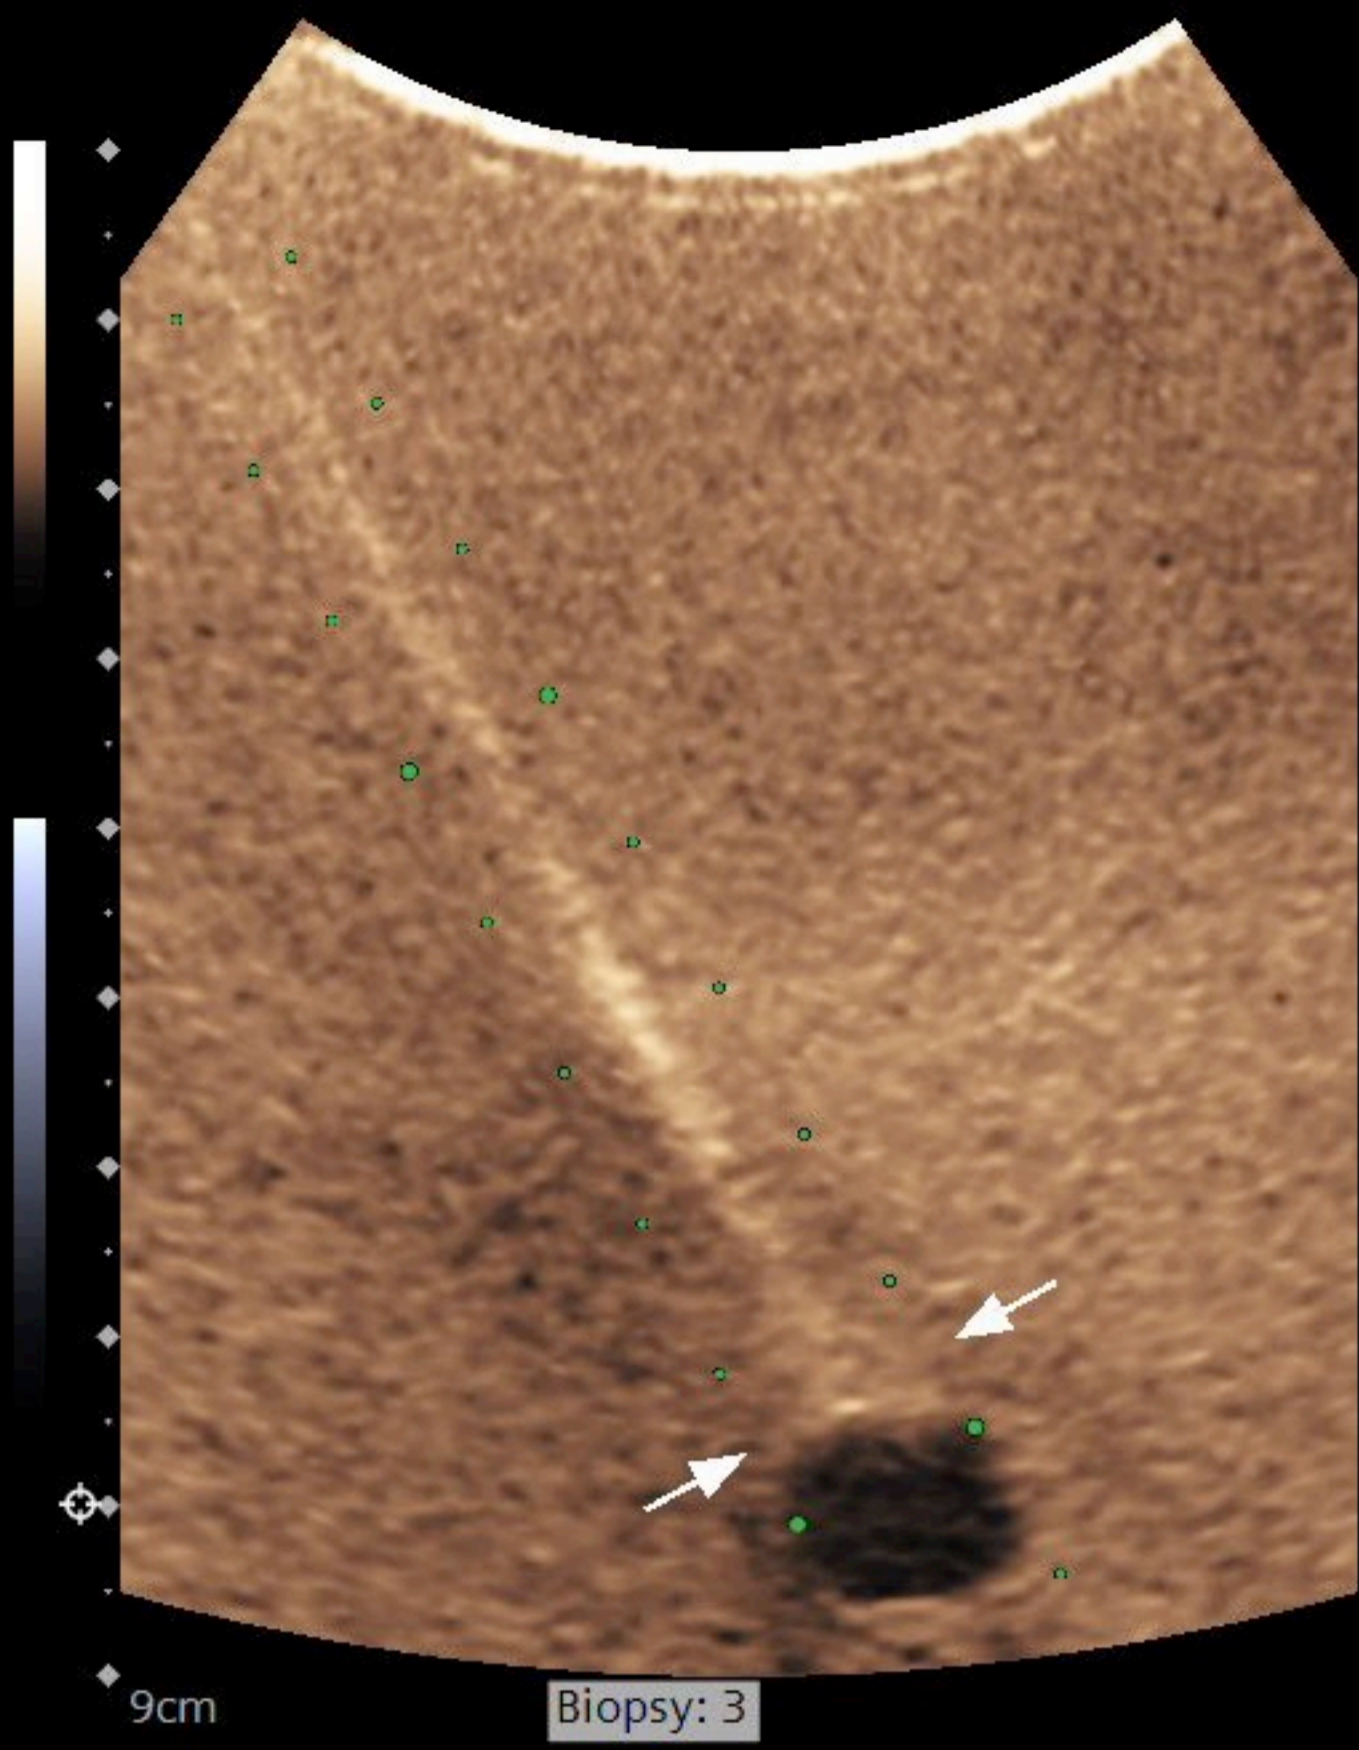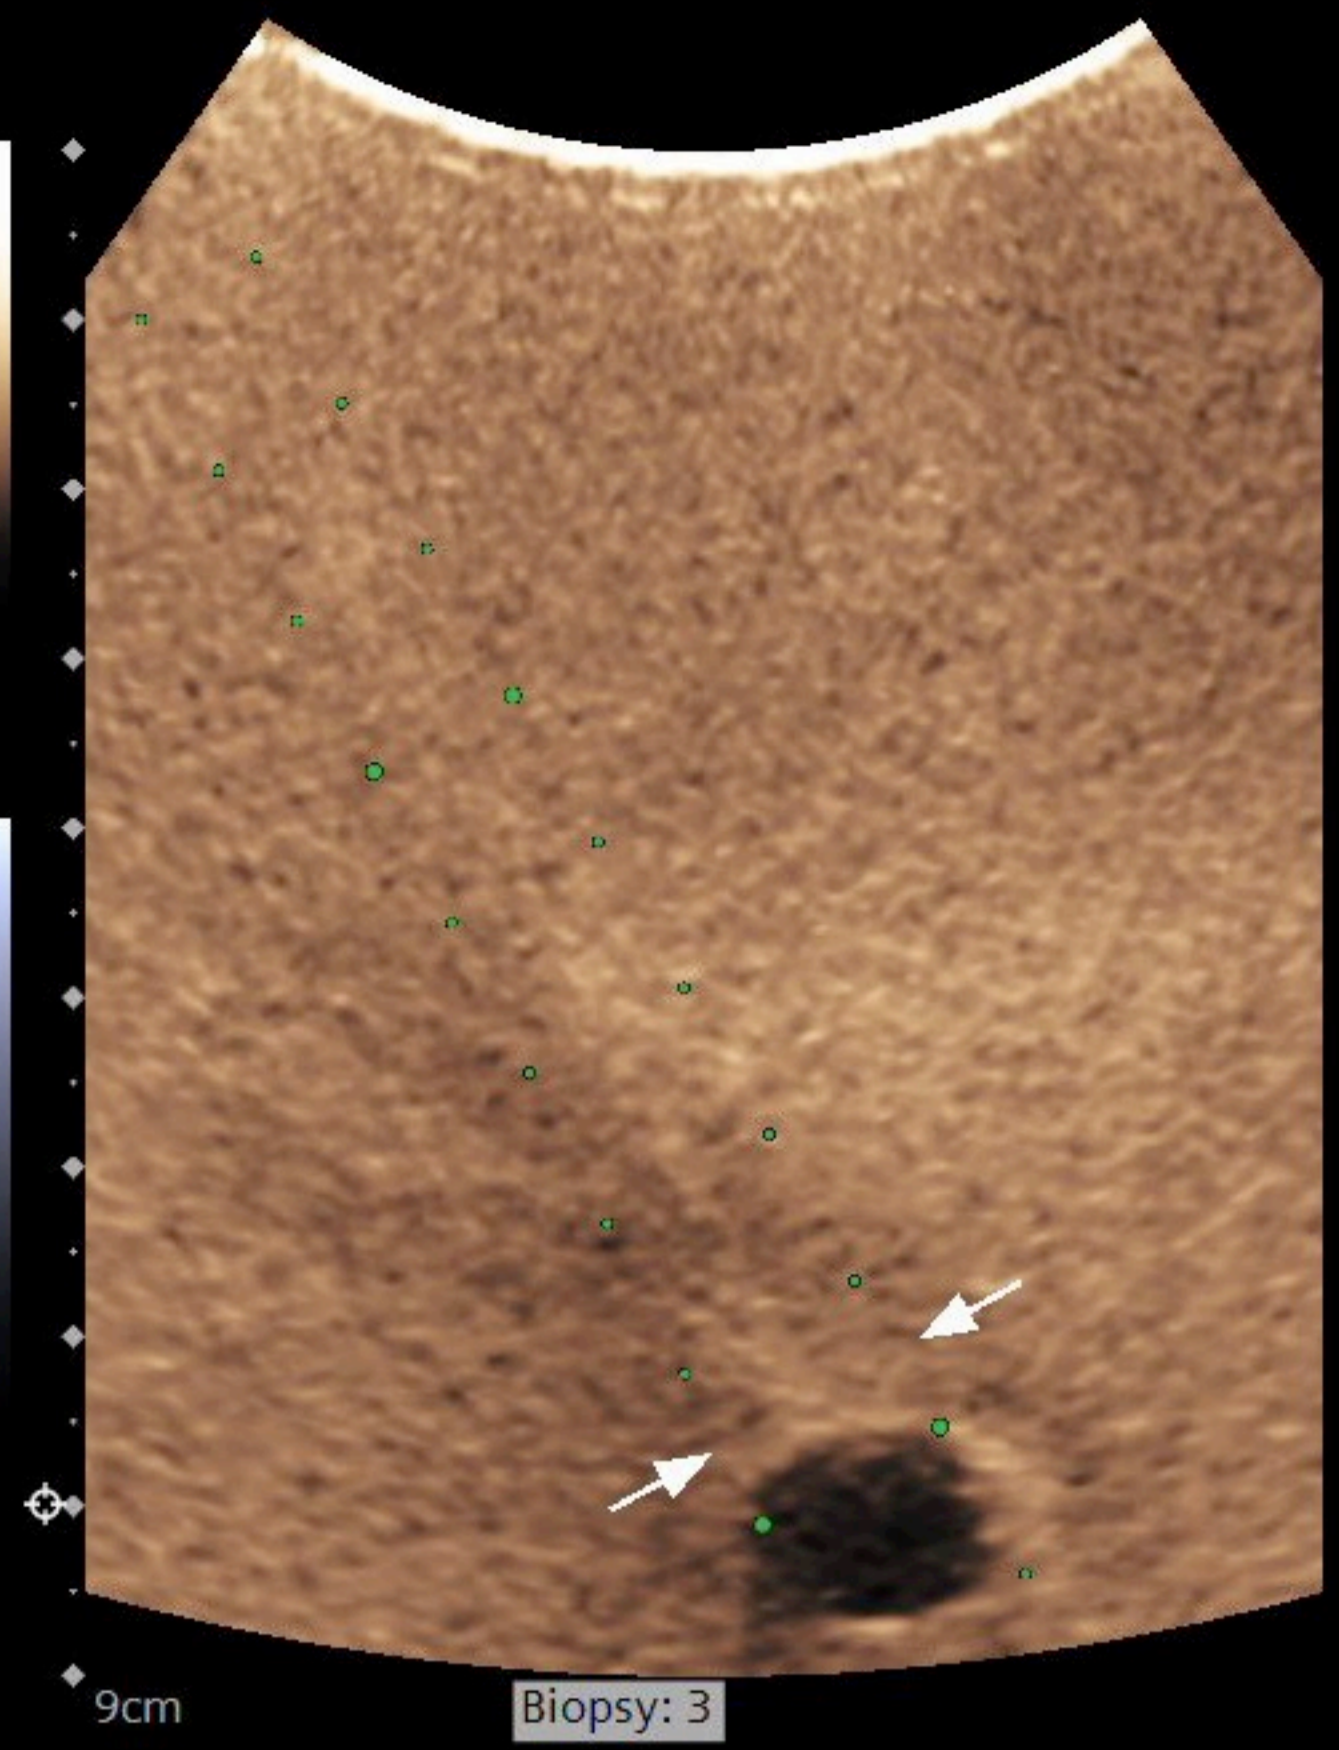

1st puncture

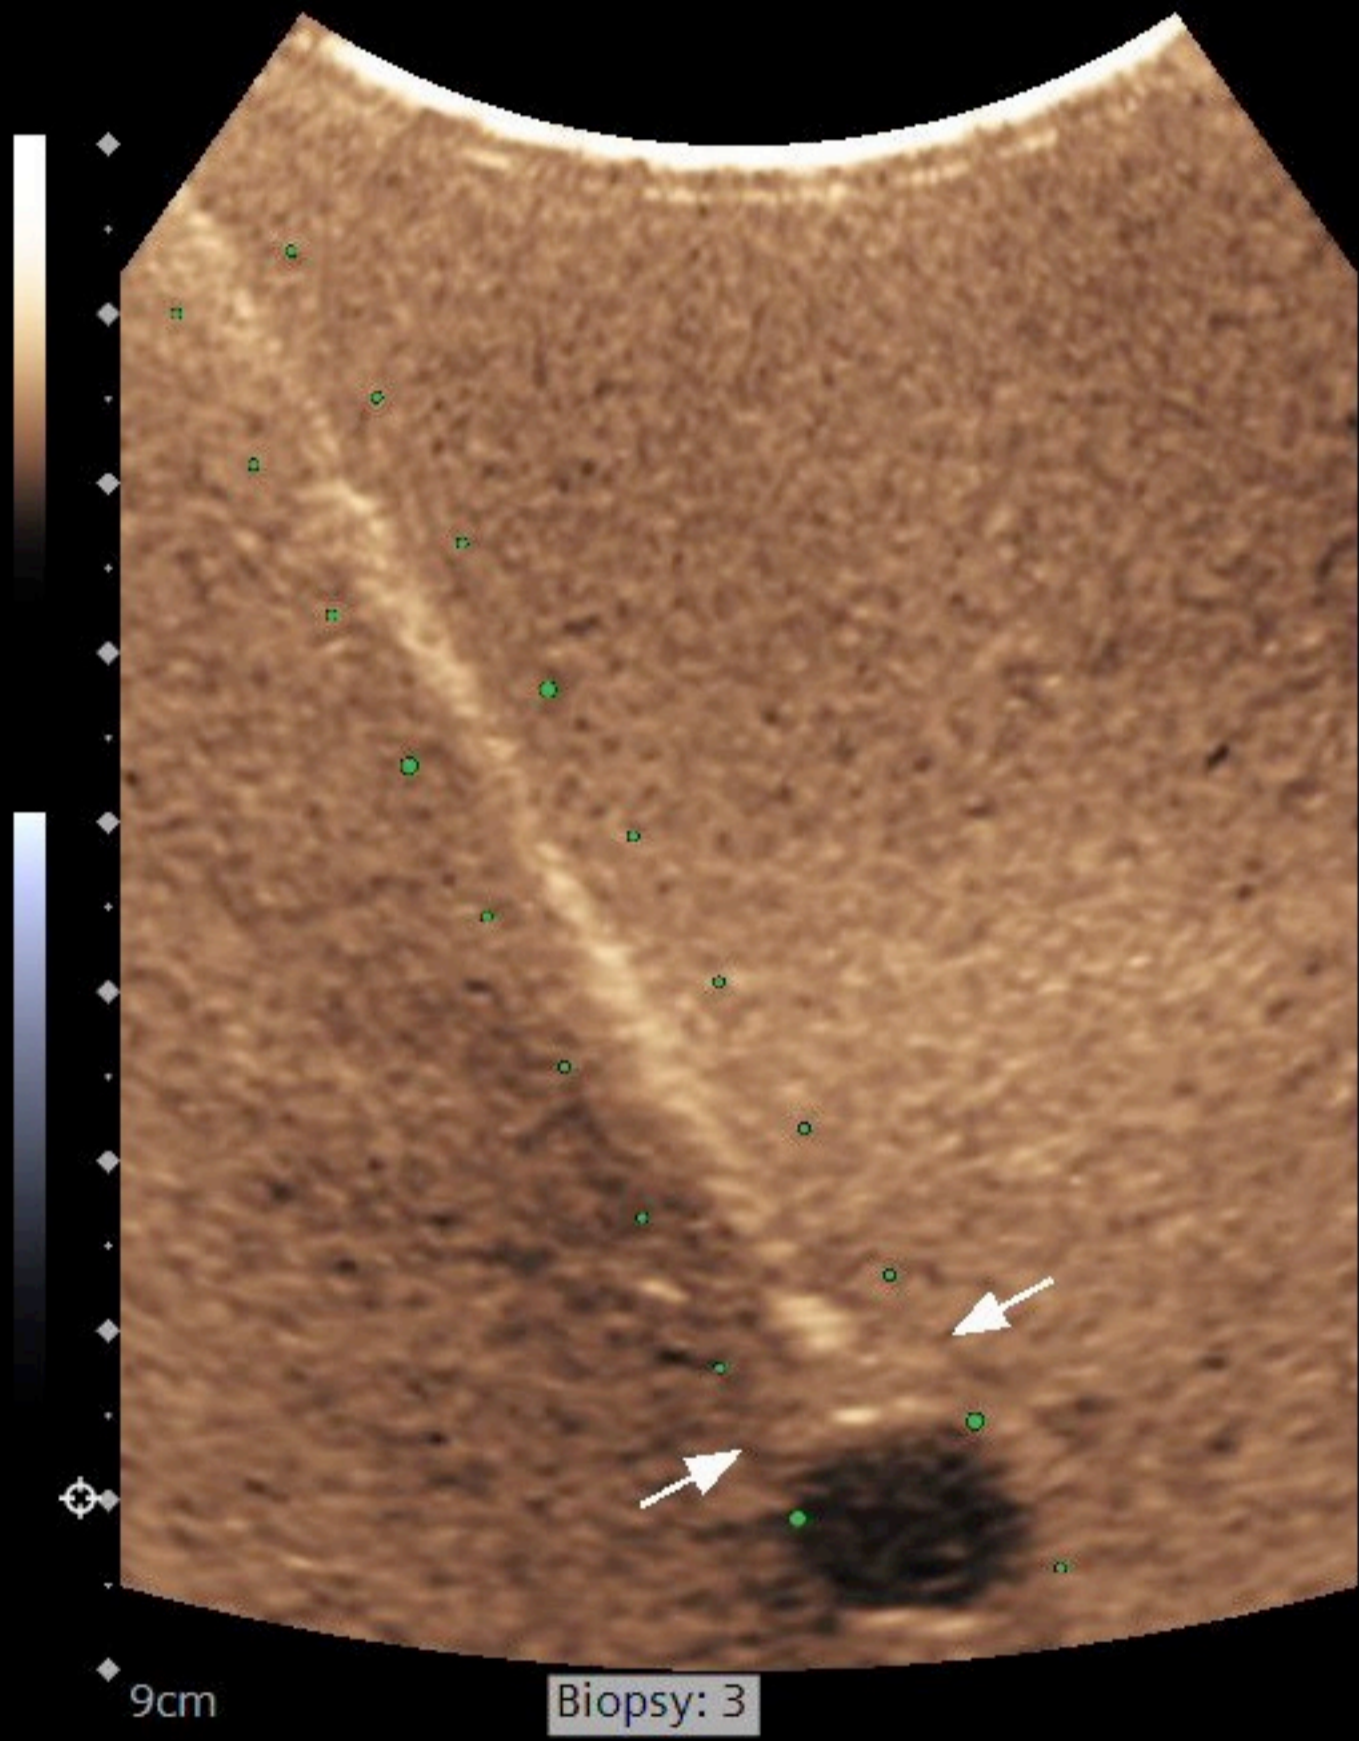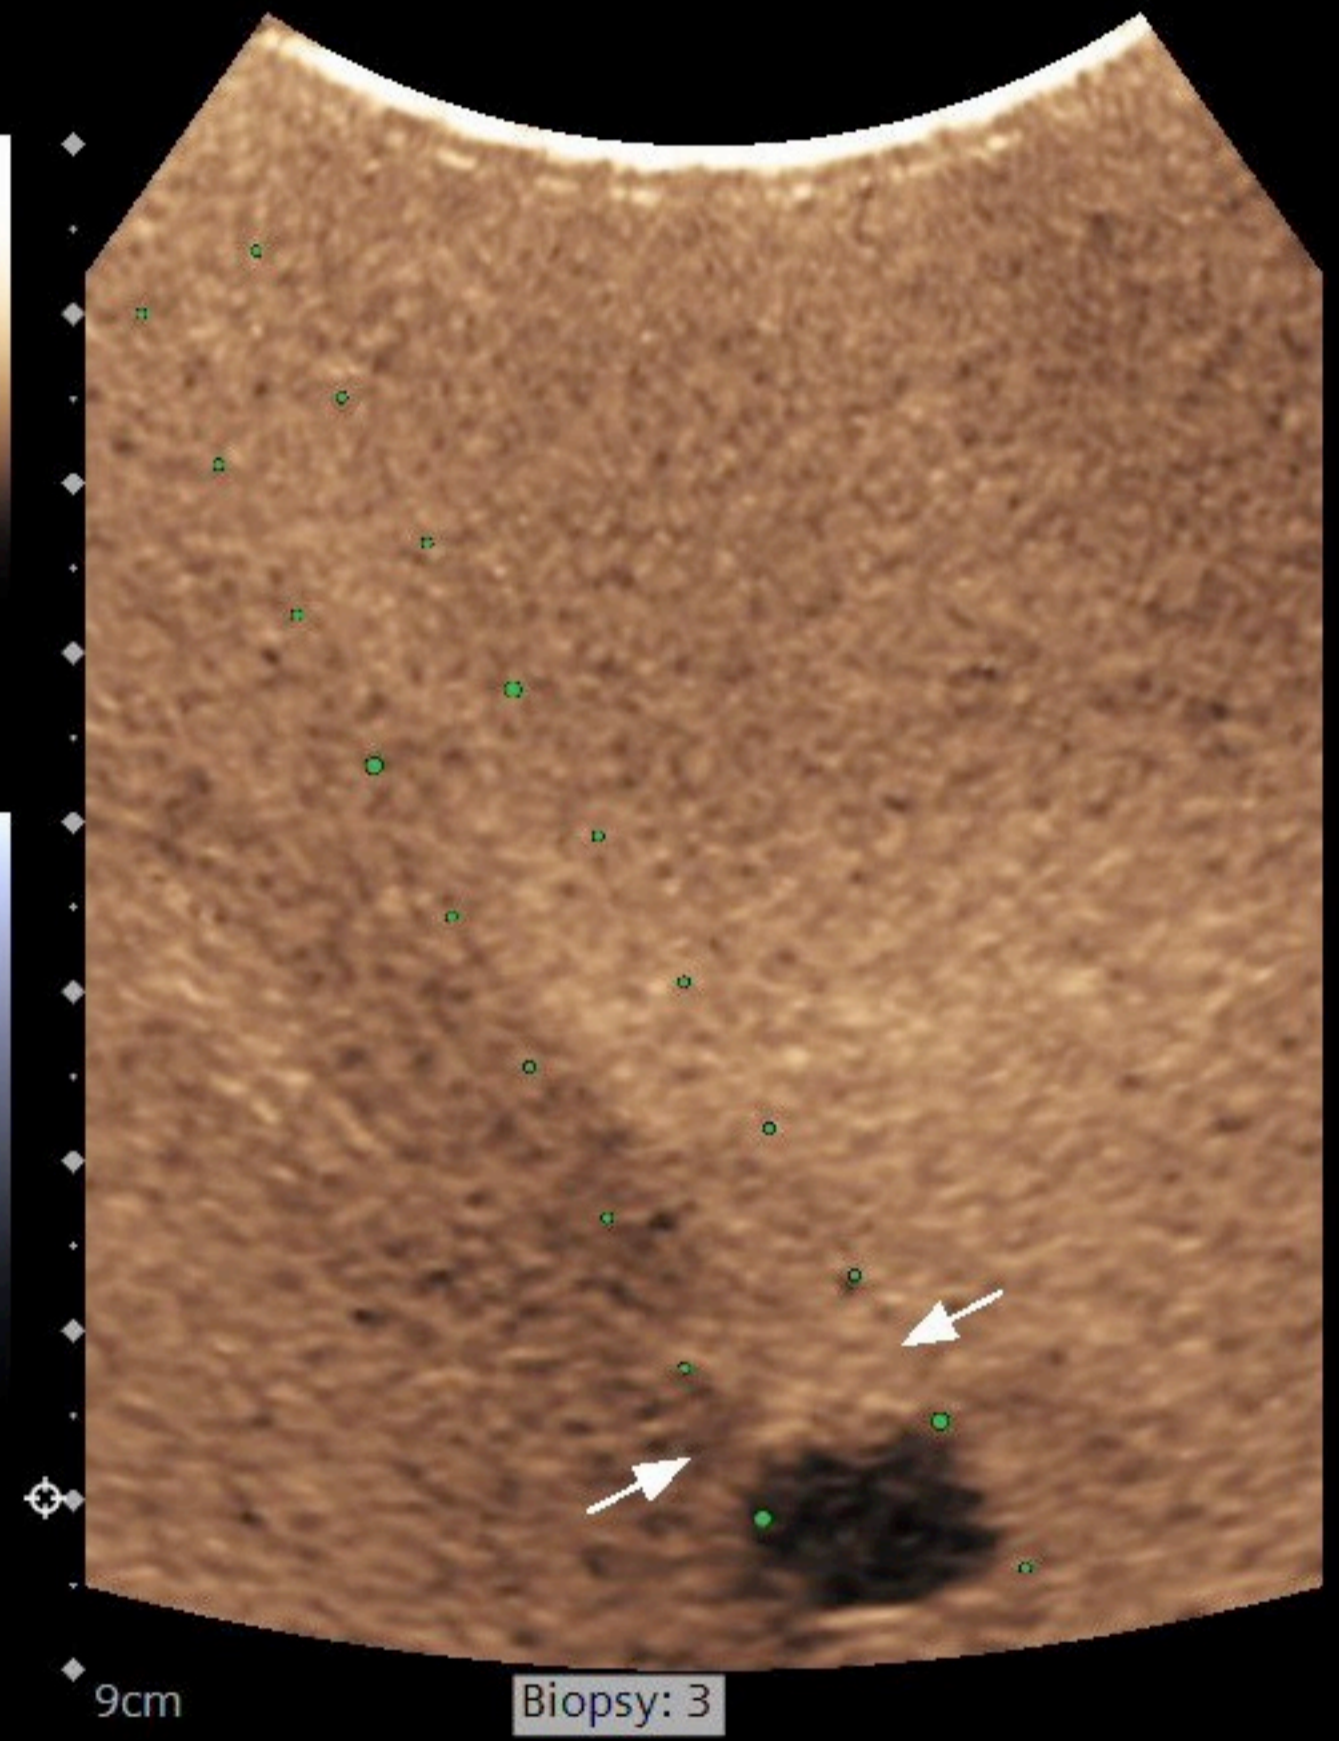

2nd puncture

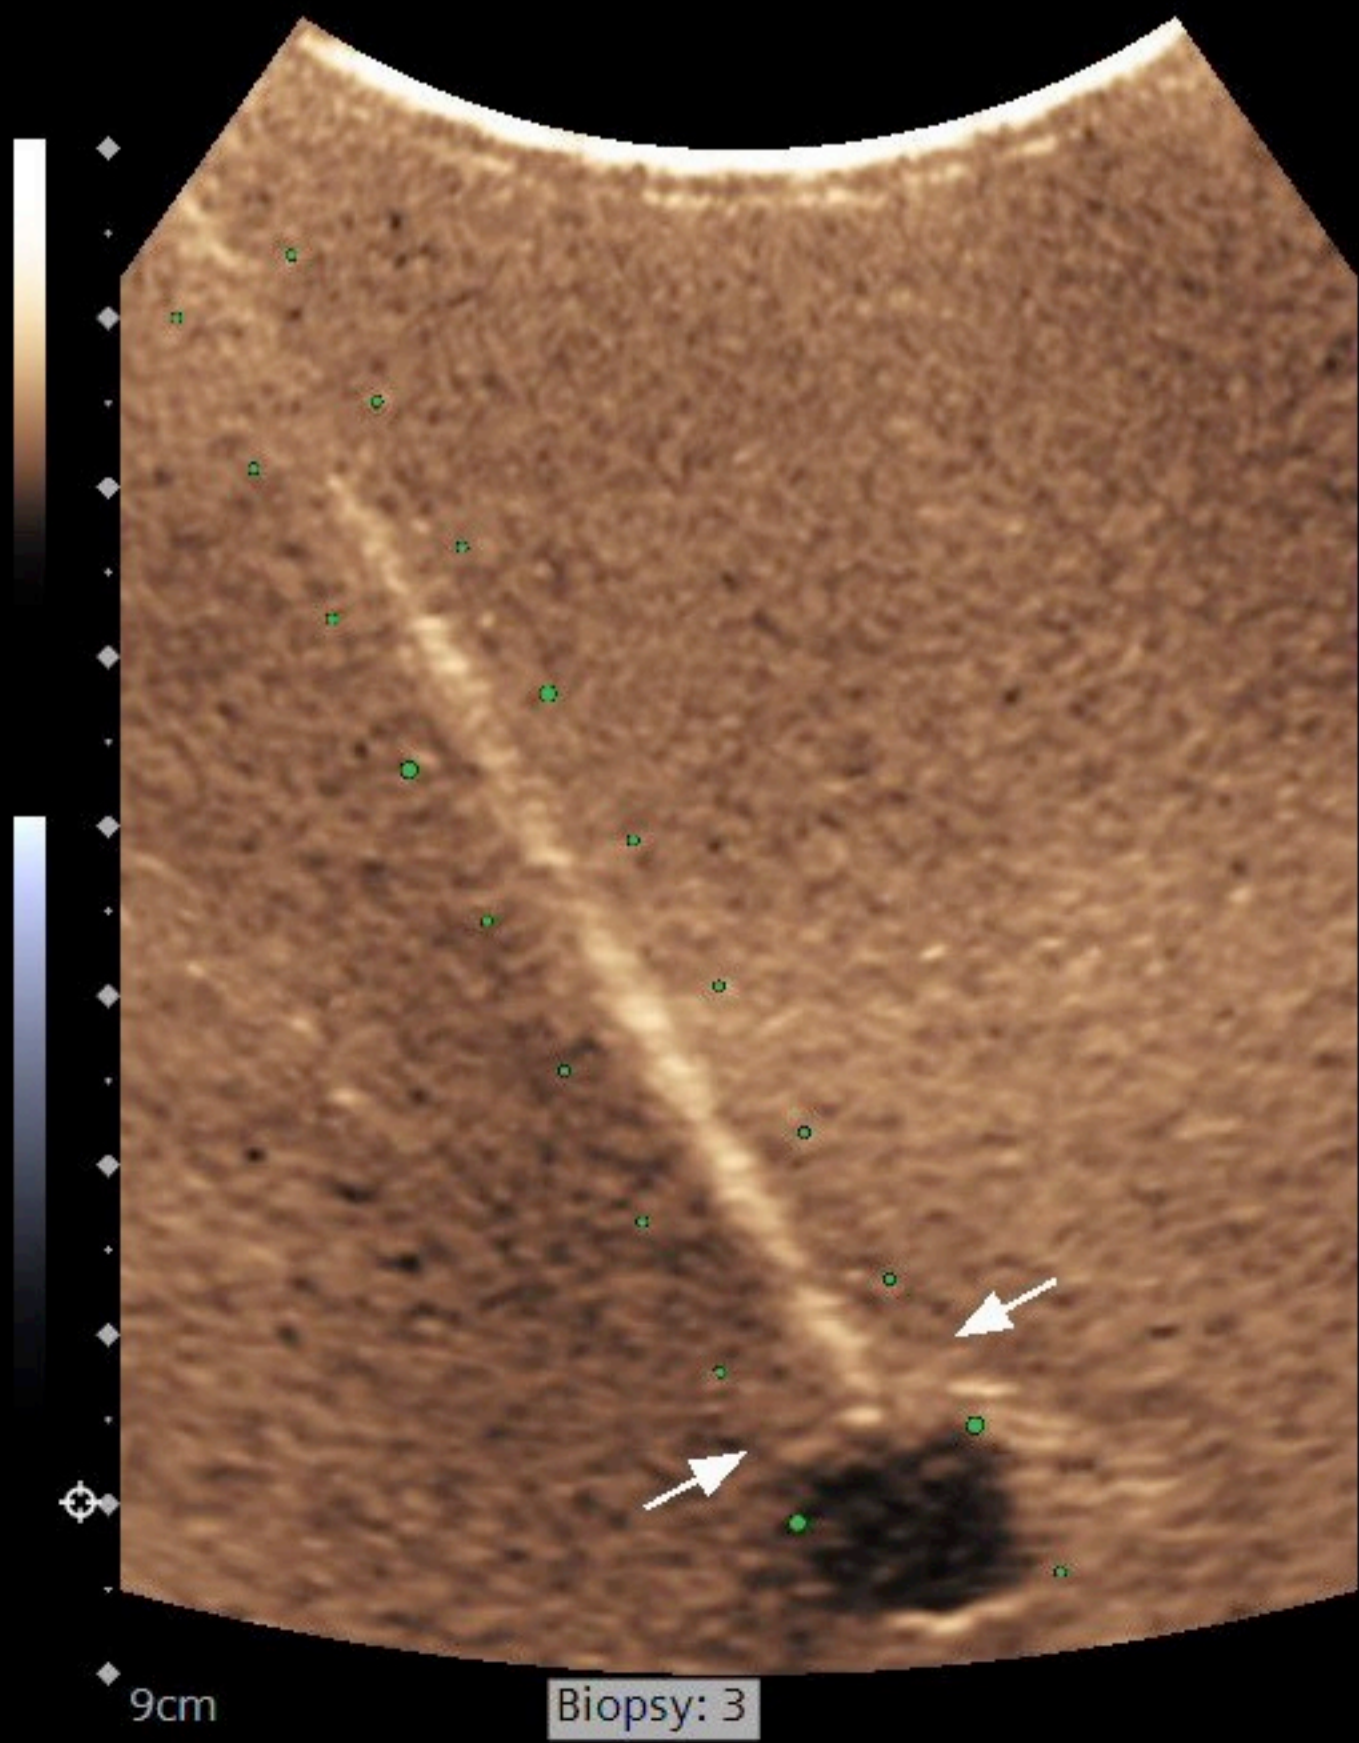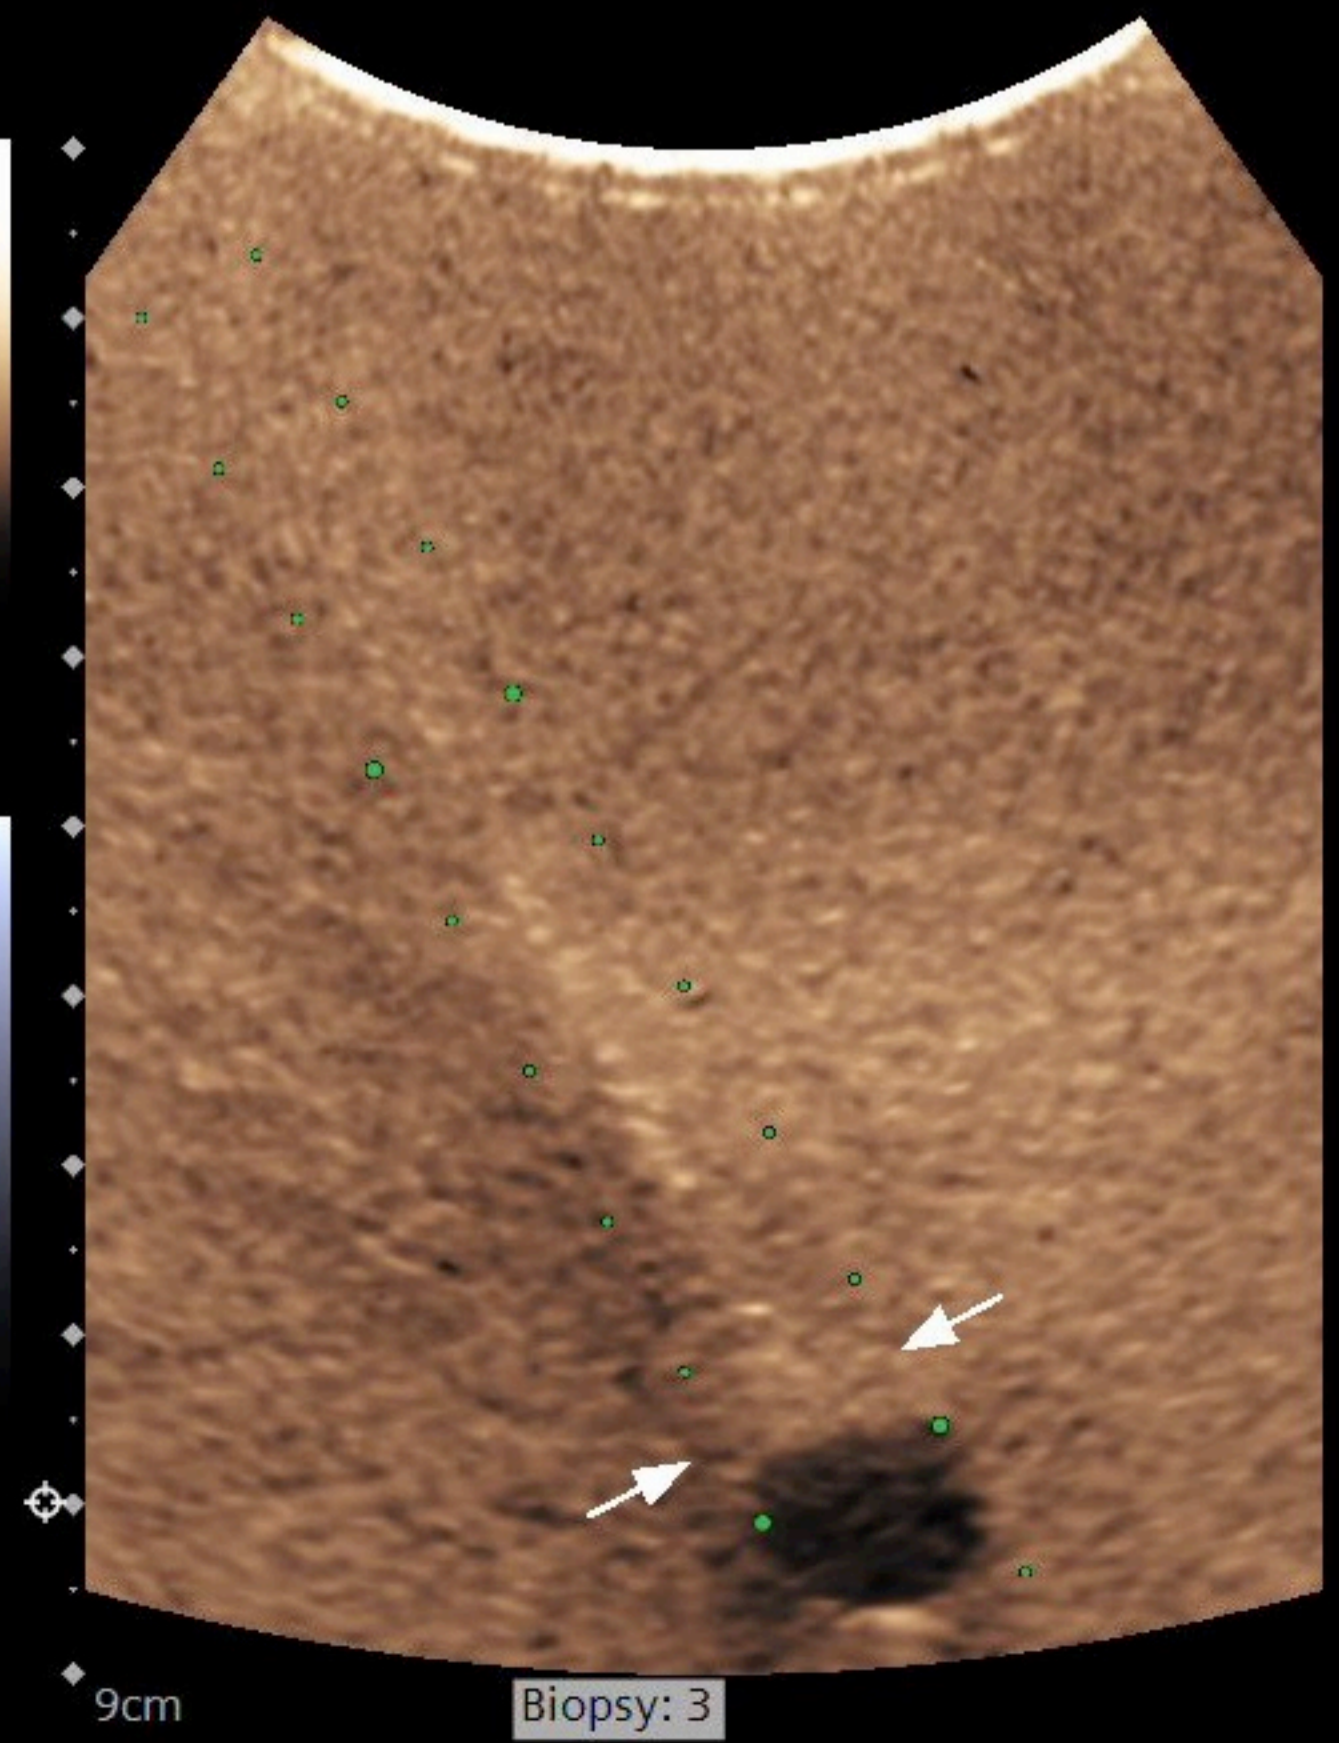

3rd puncture

Ultrasound contrast agent

Control



Side-notch biopsy needle (set 2/10)

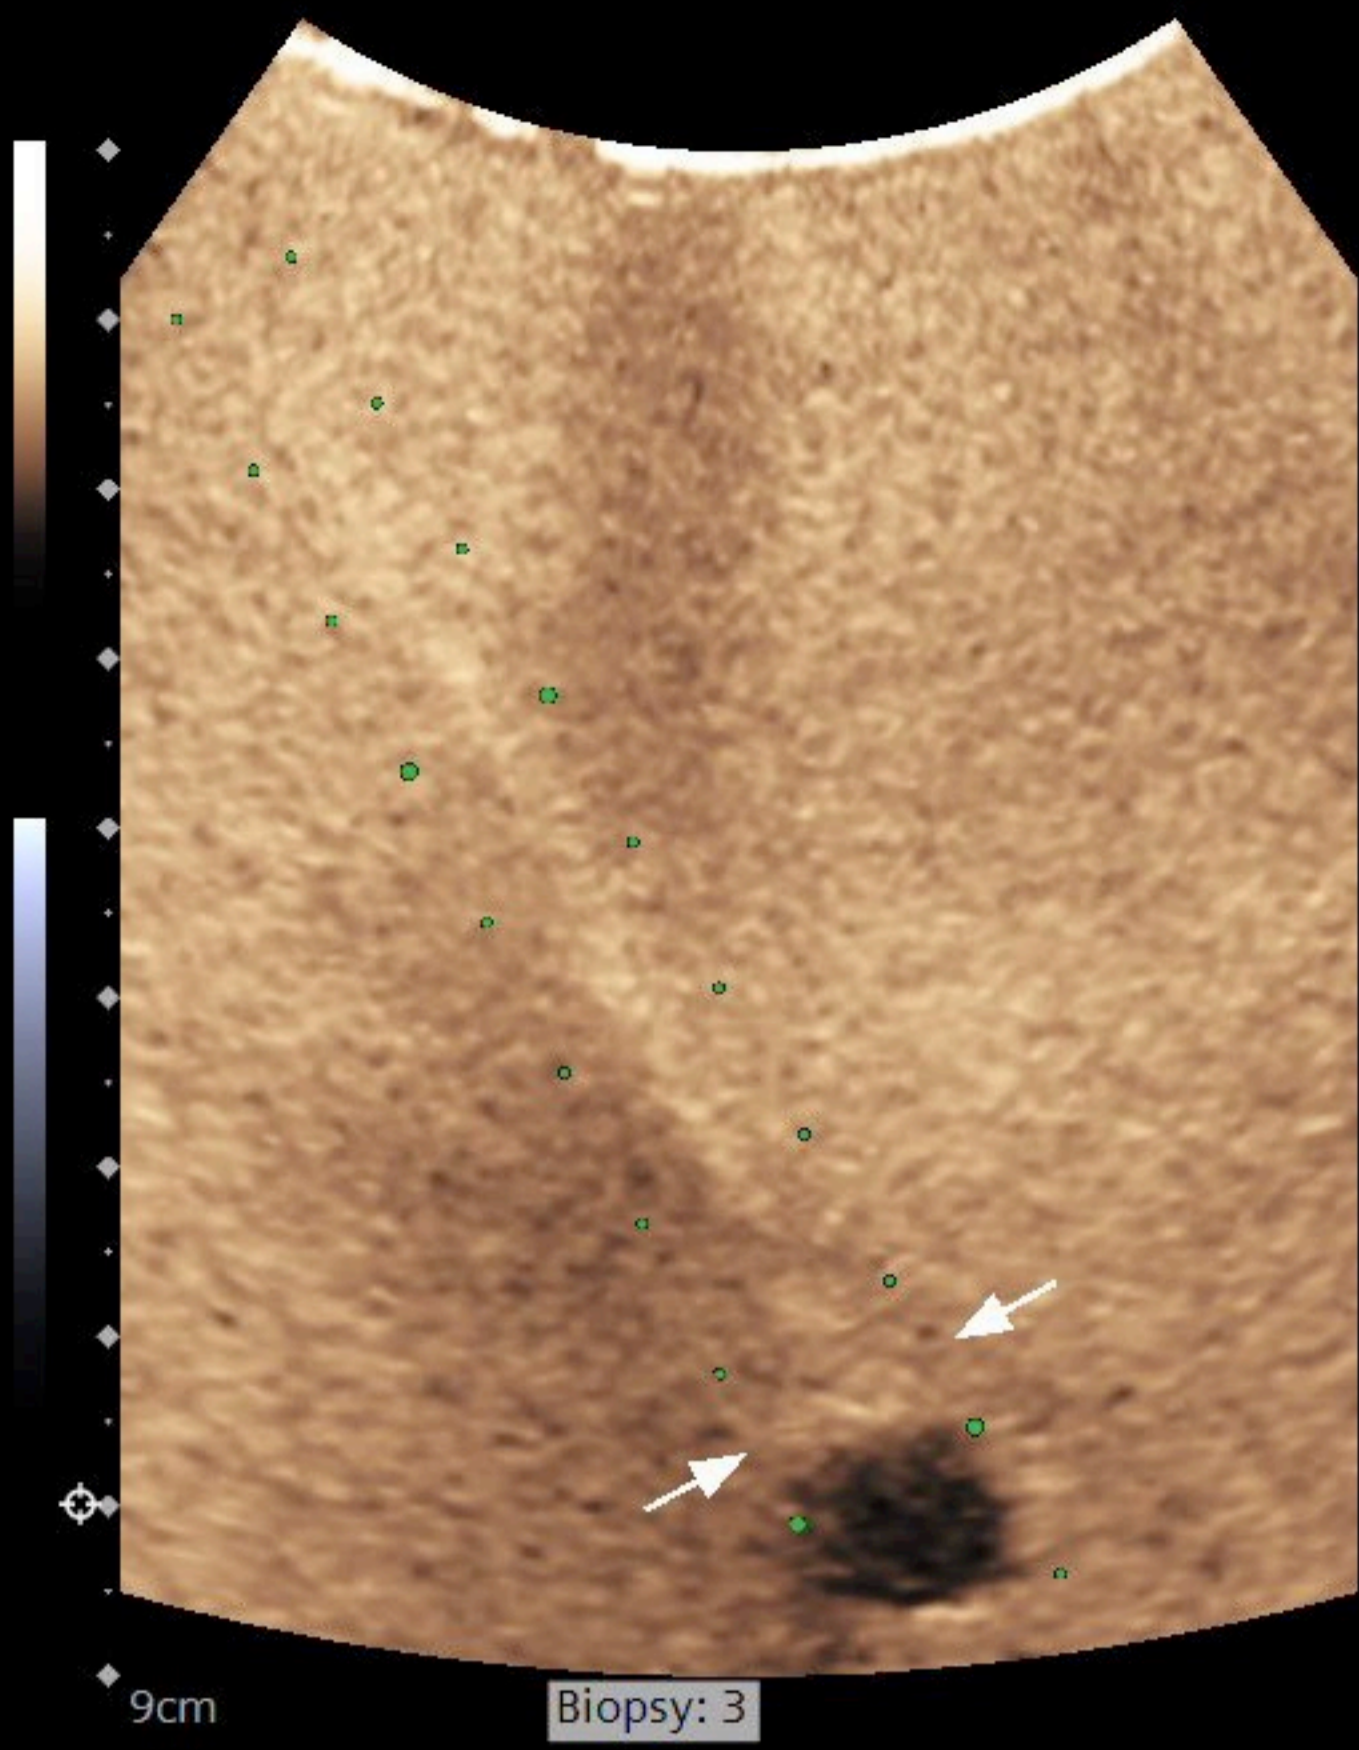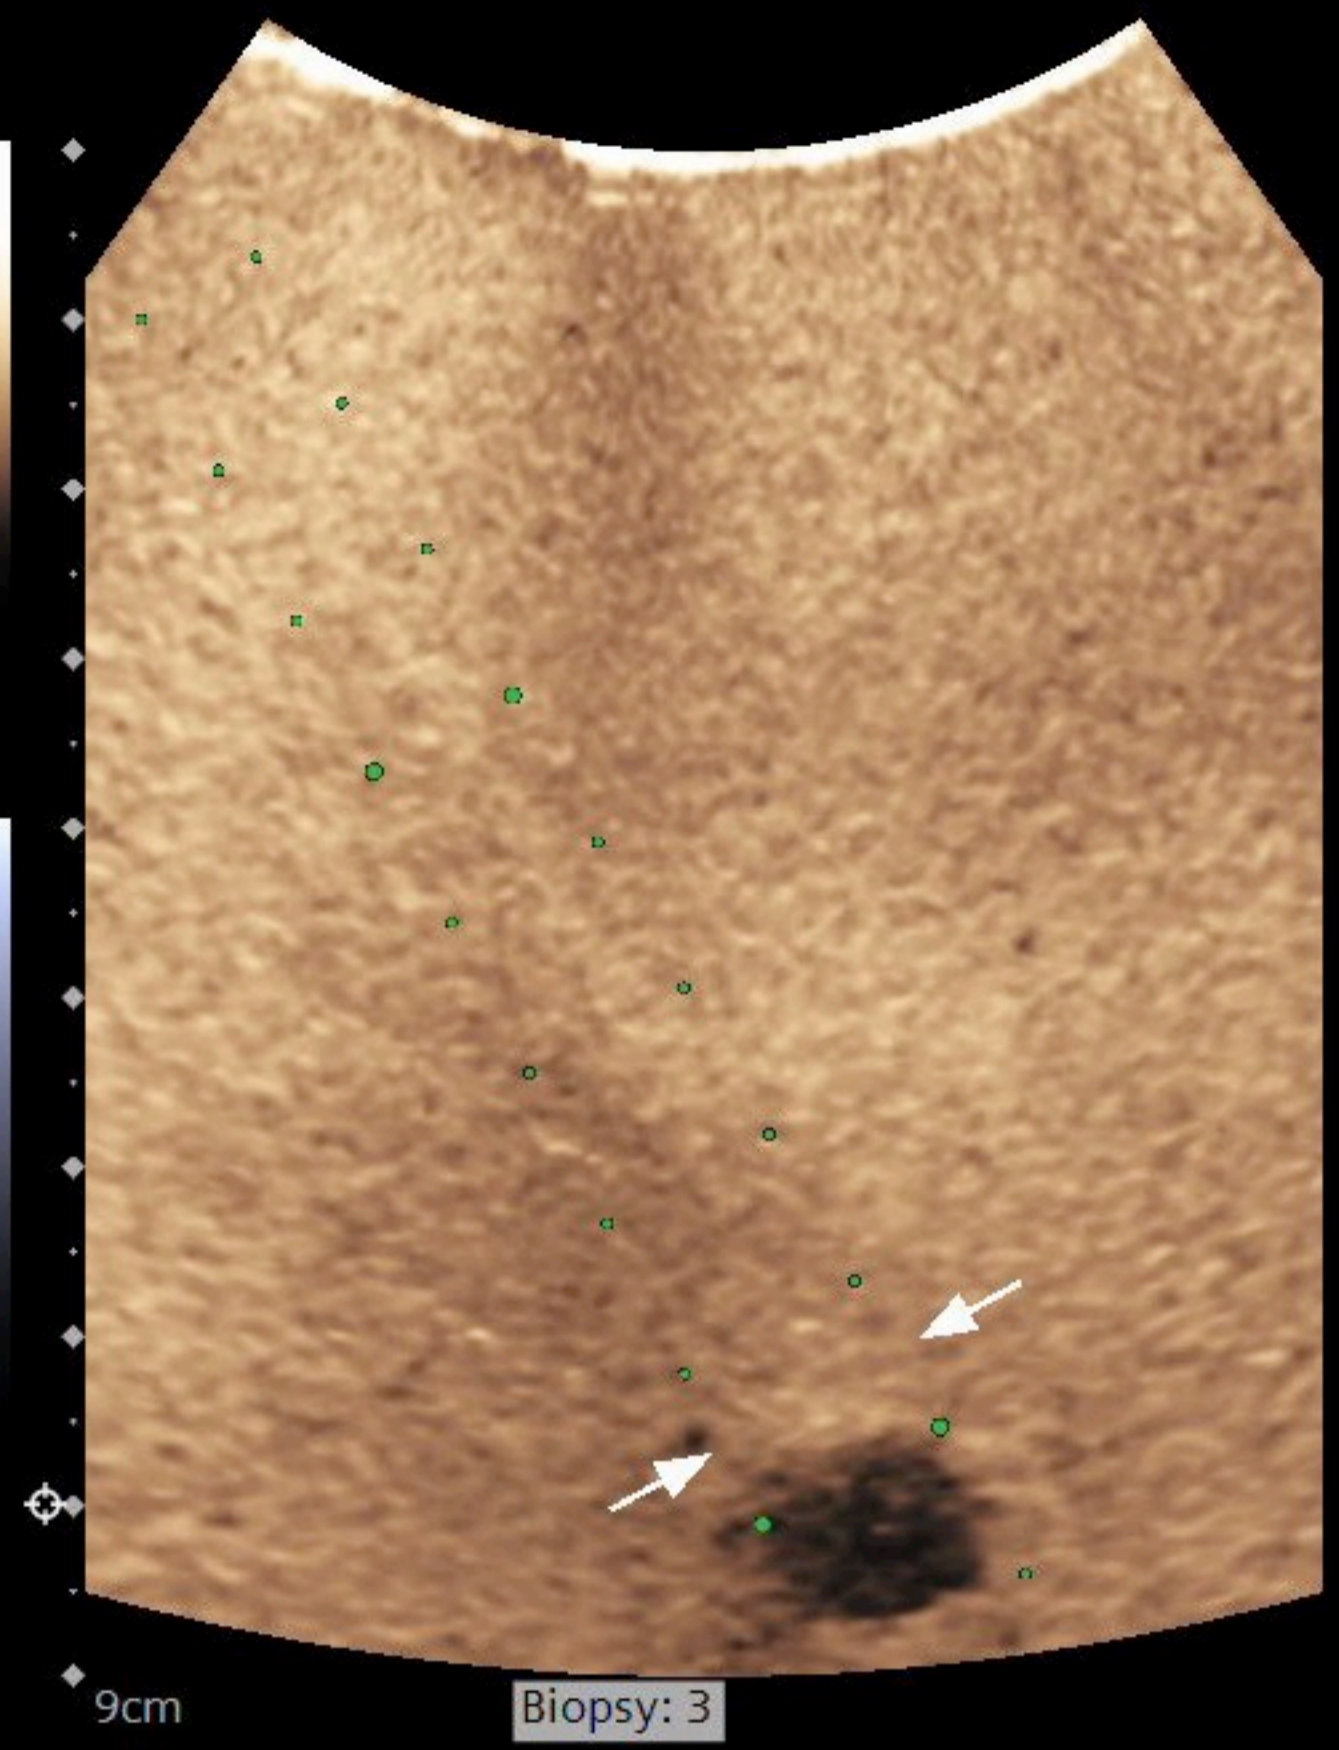

1st puncture

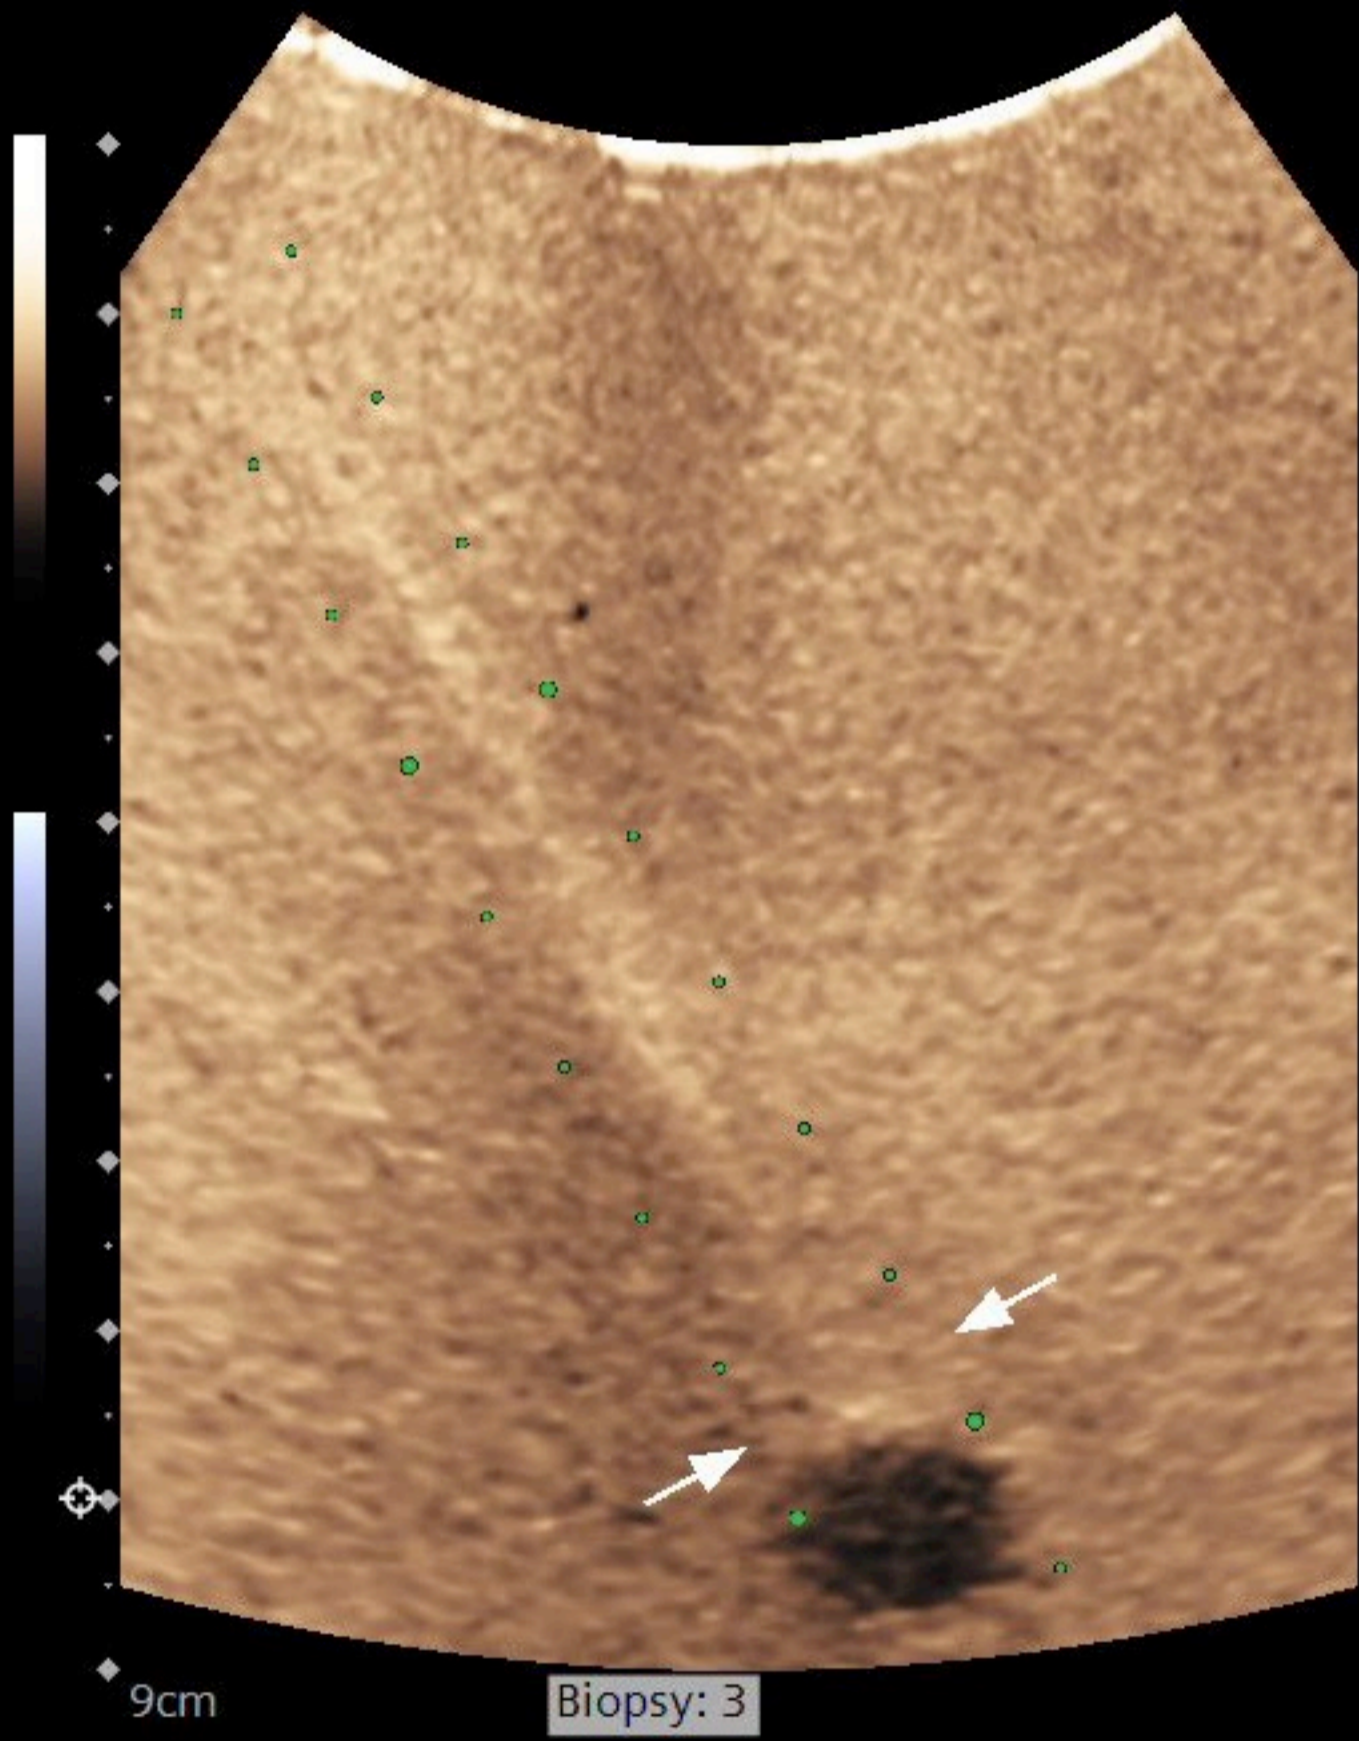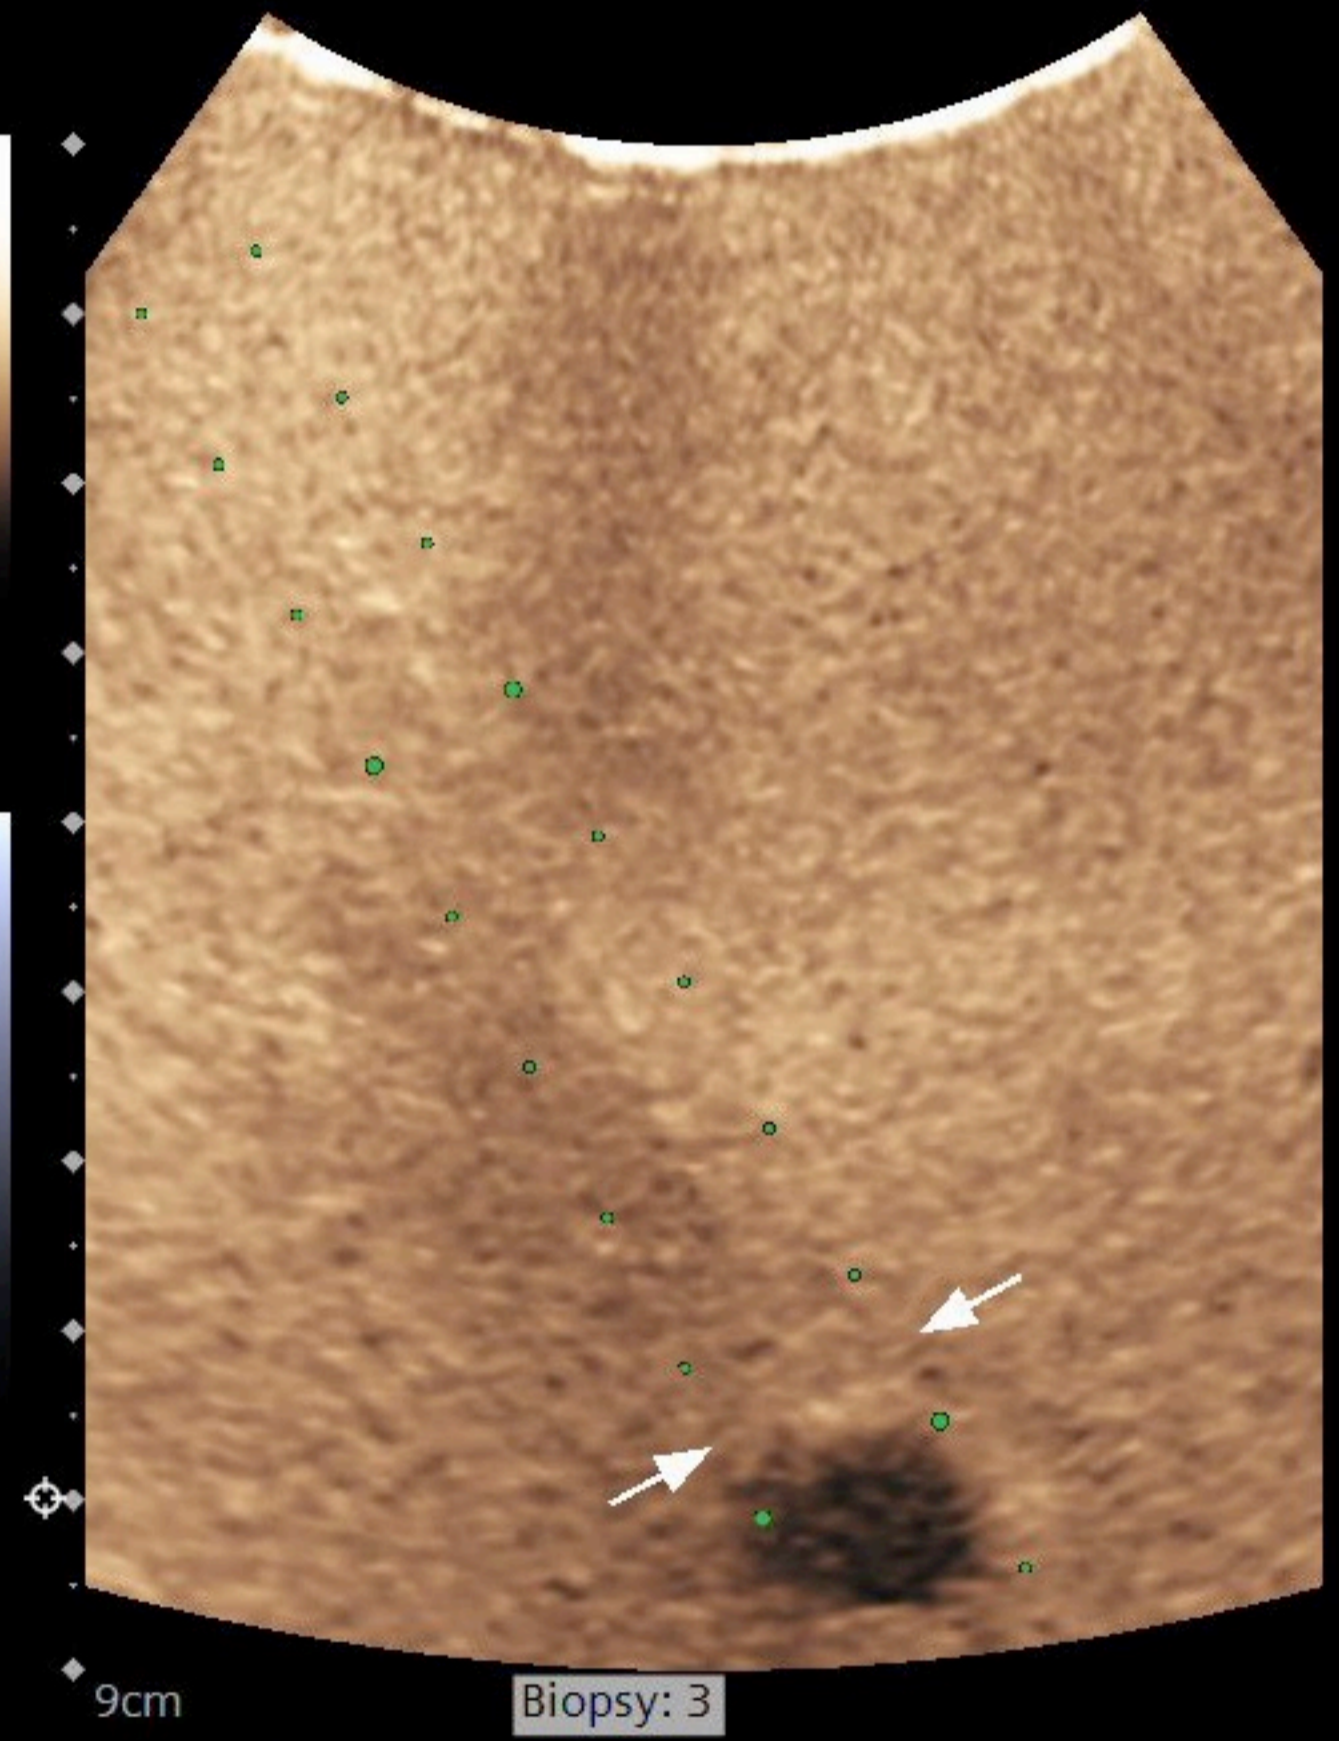

2nd puncture

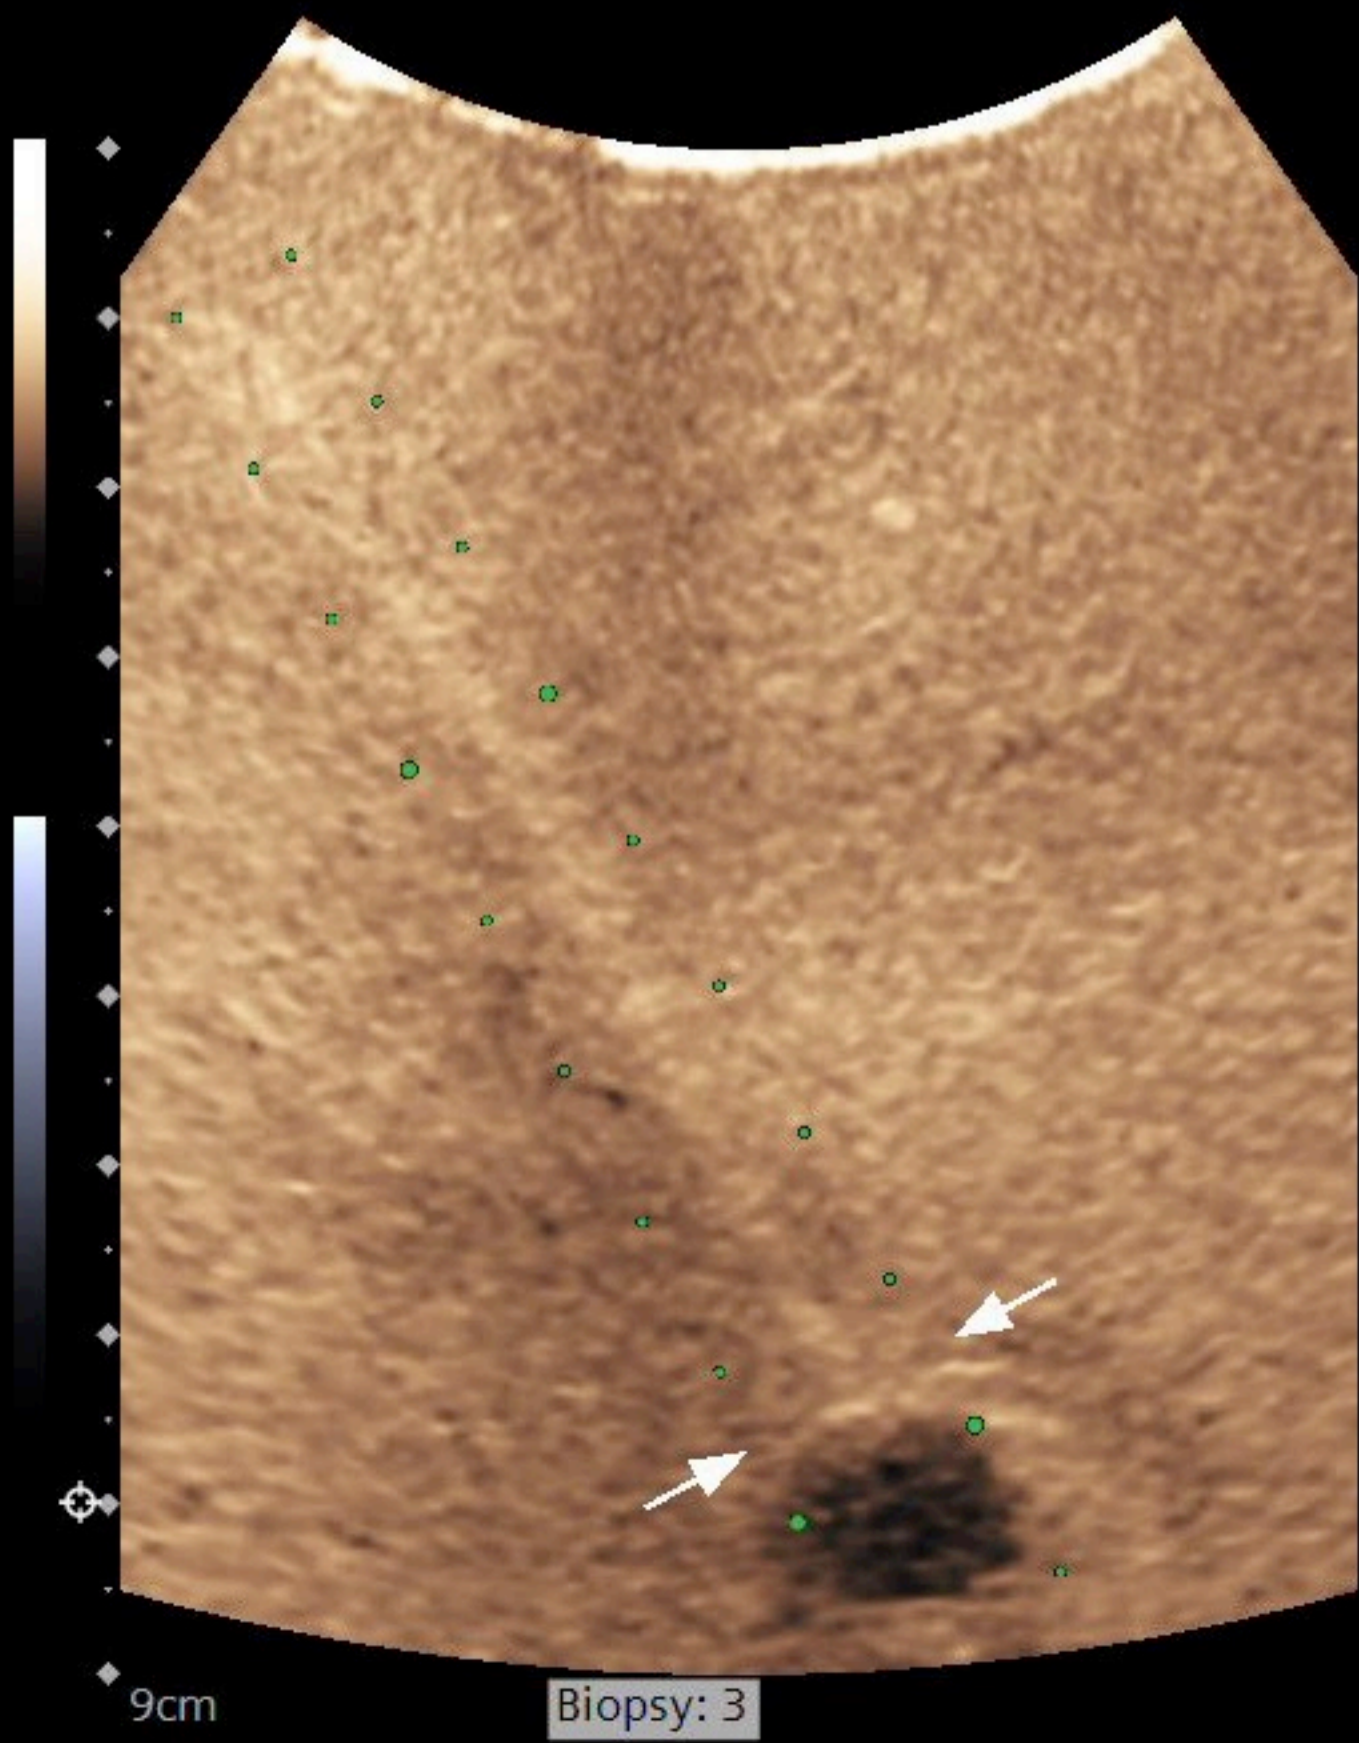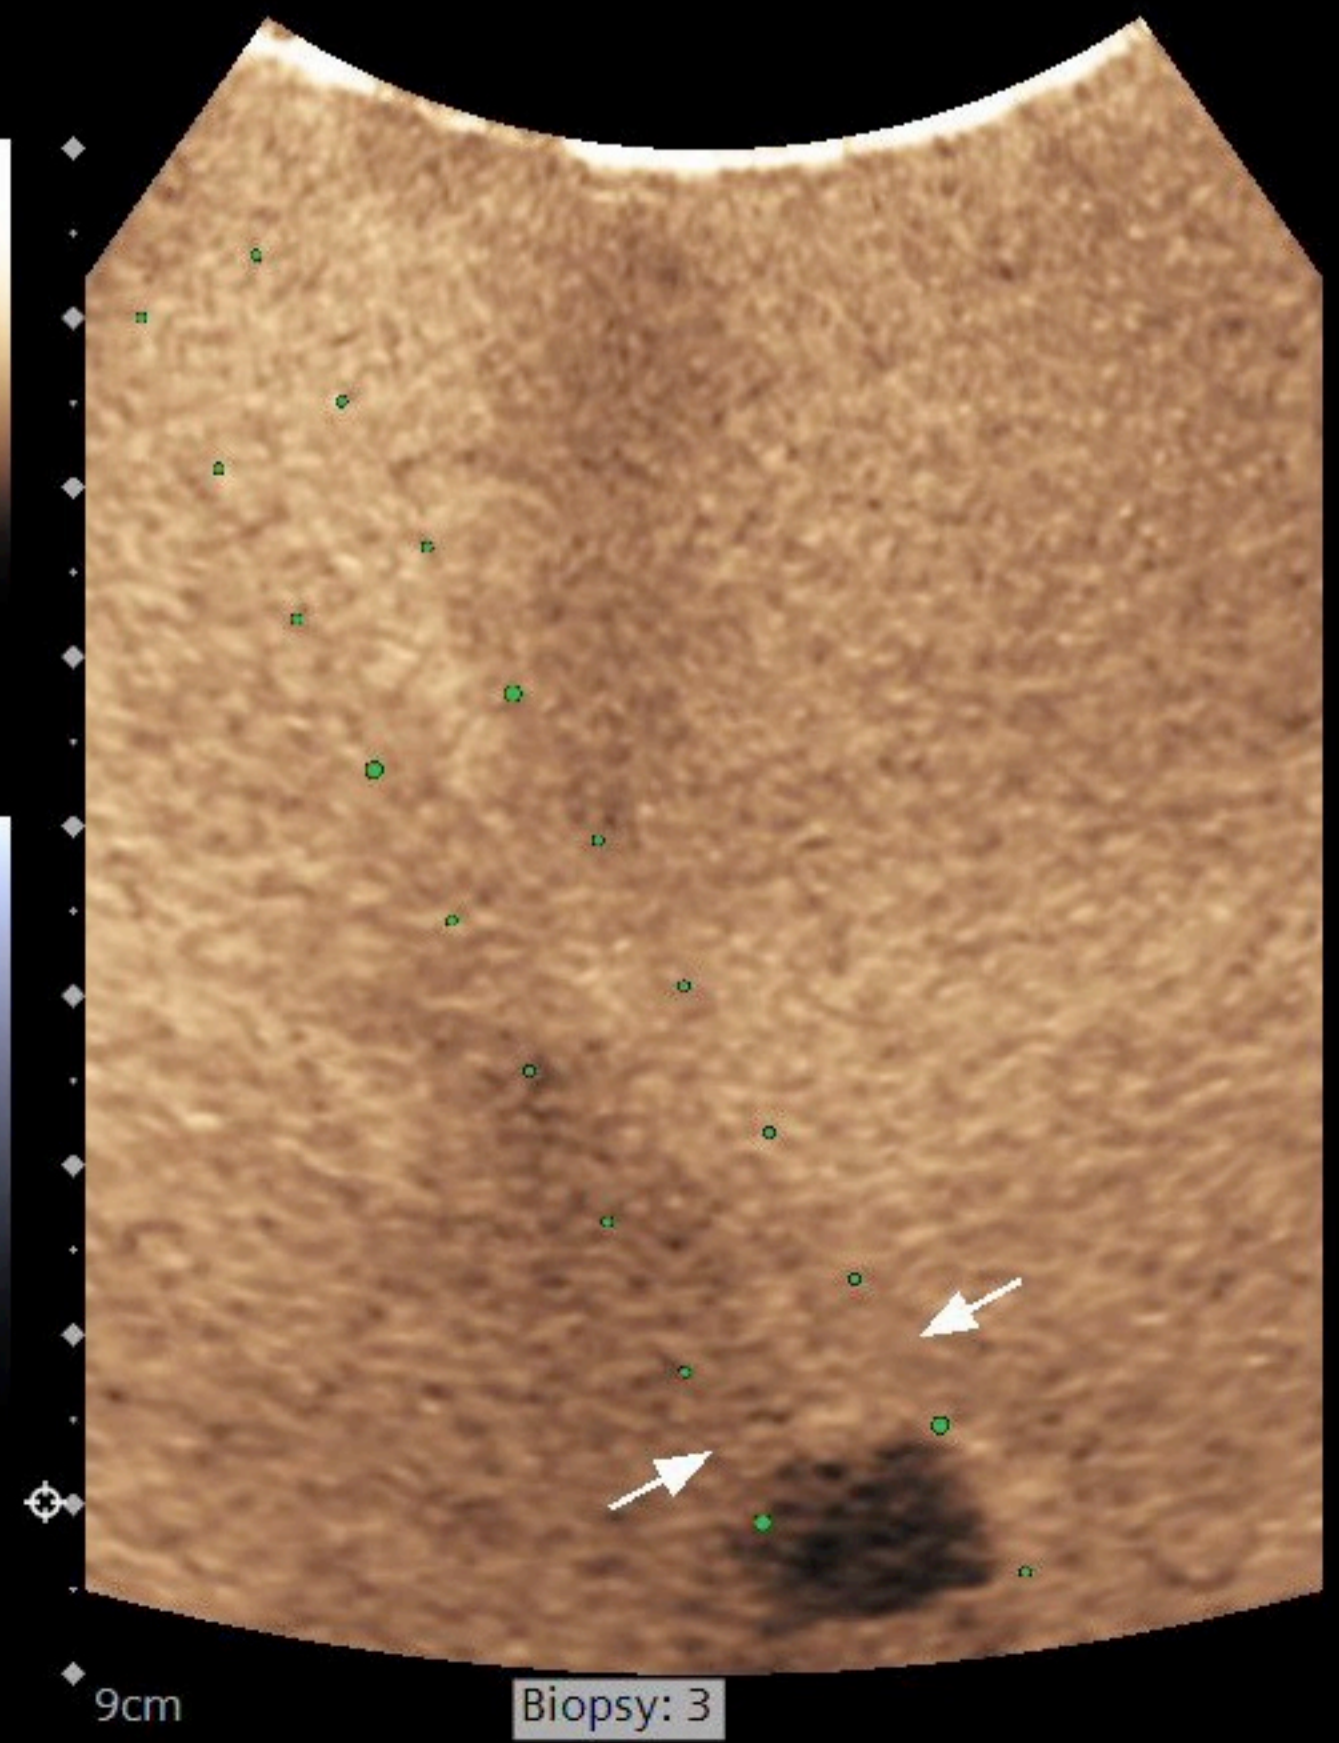

3rd puncture

Ultrasound contrast agent

Control



Side-notch biopsy needle (set 3/10)

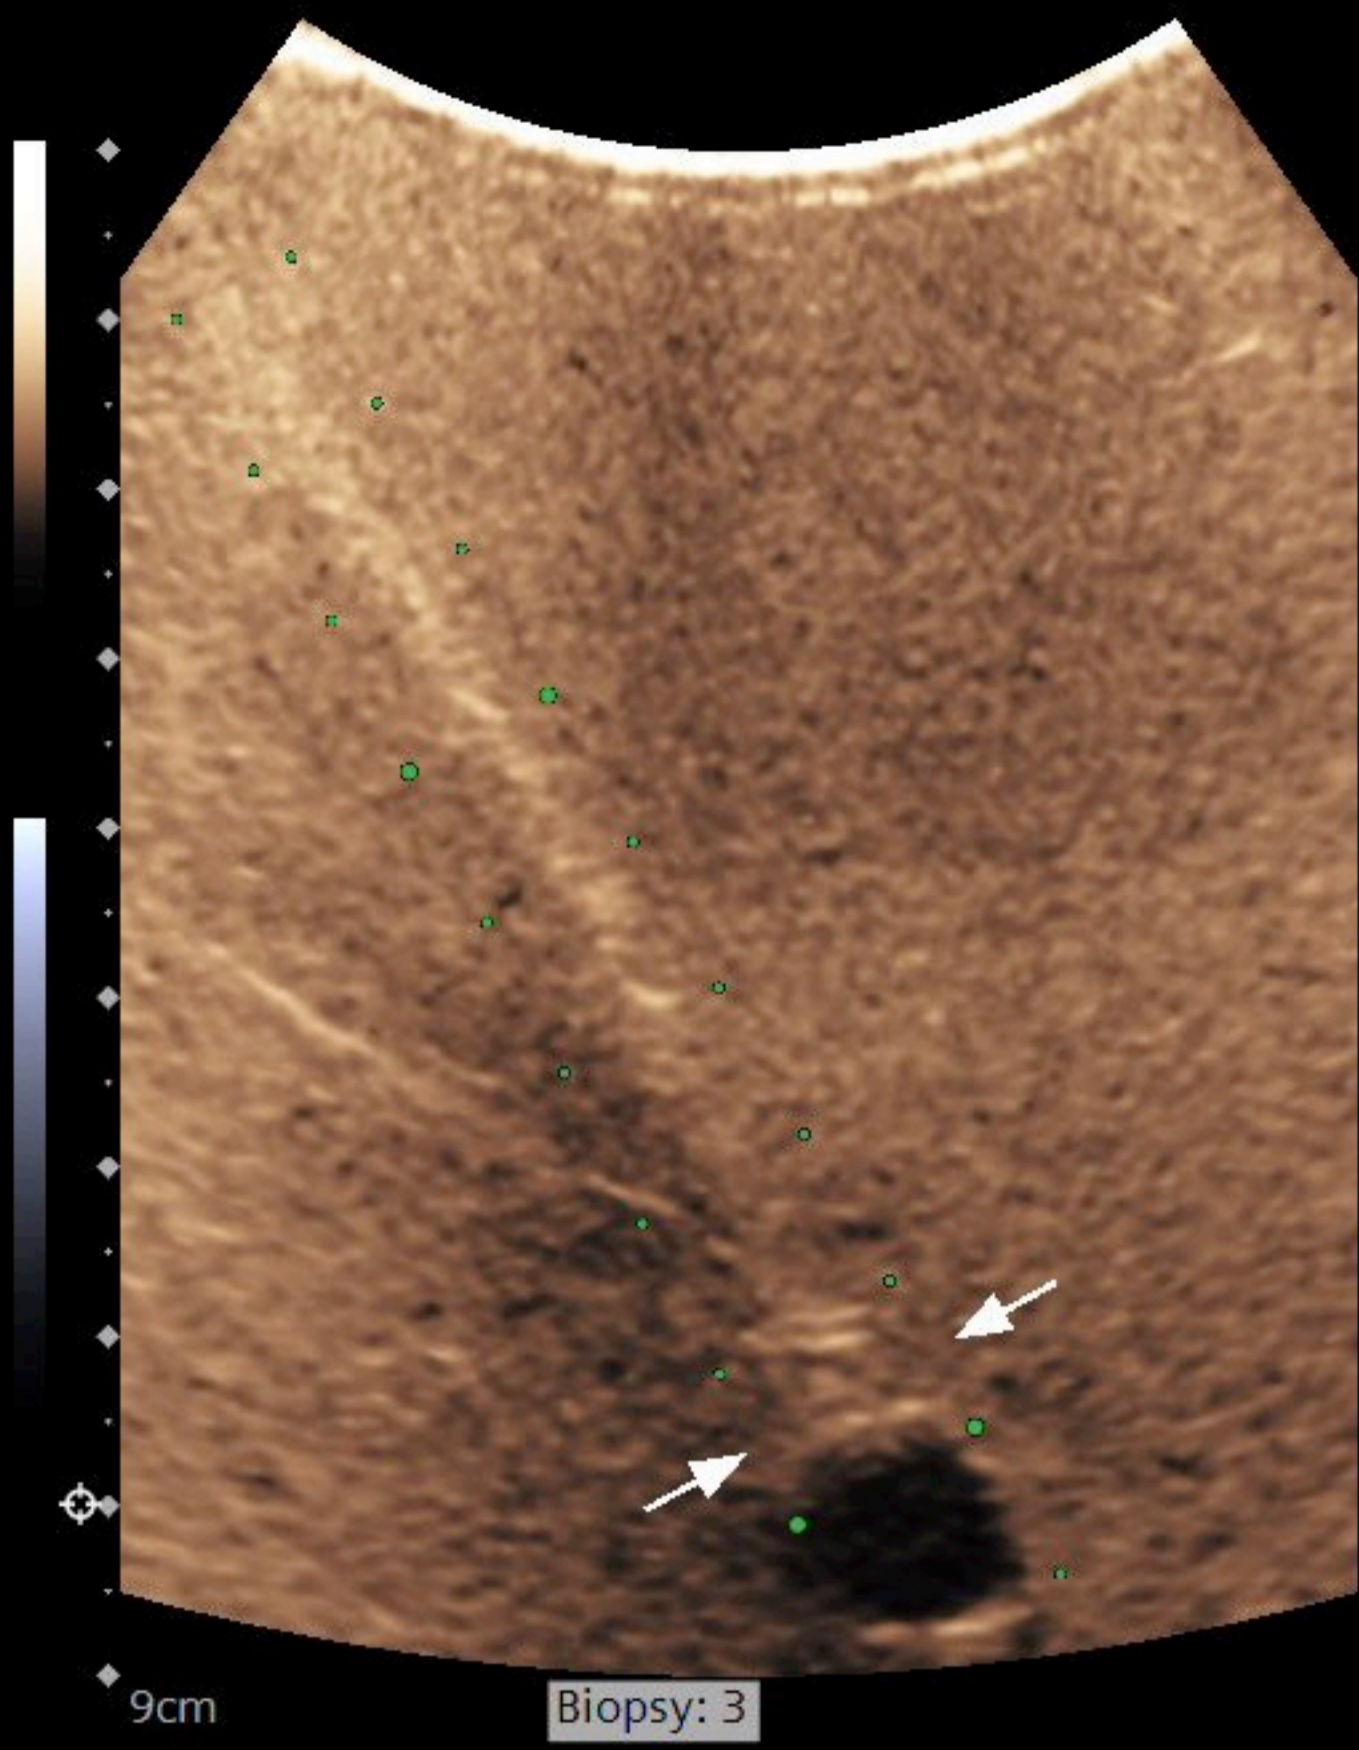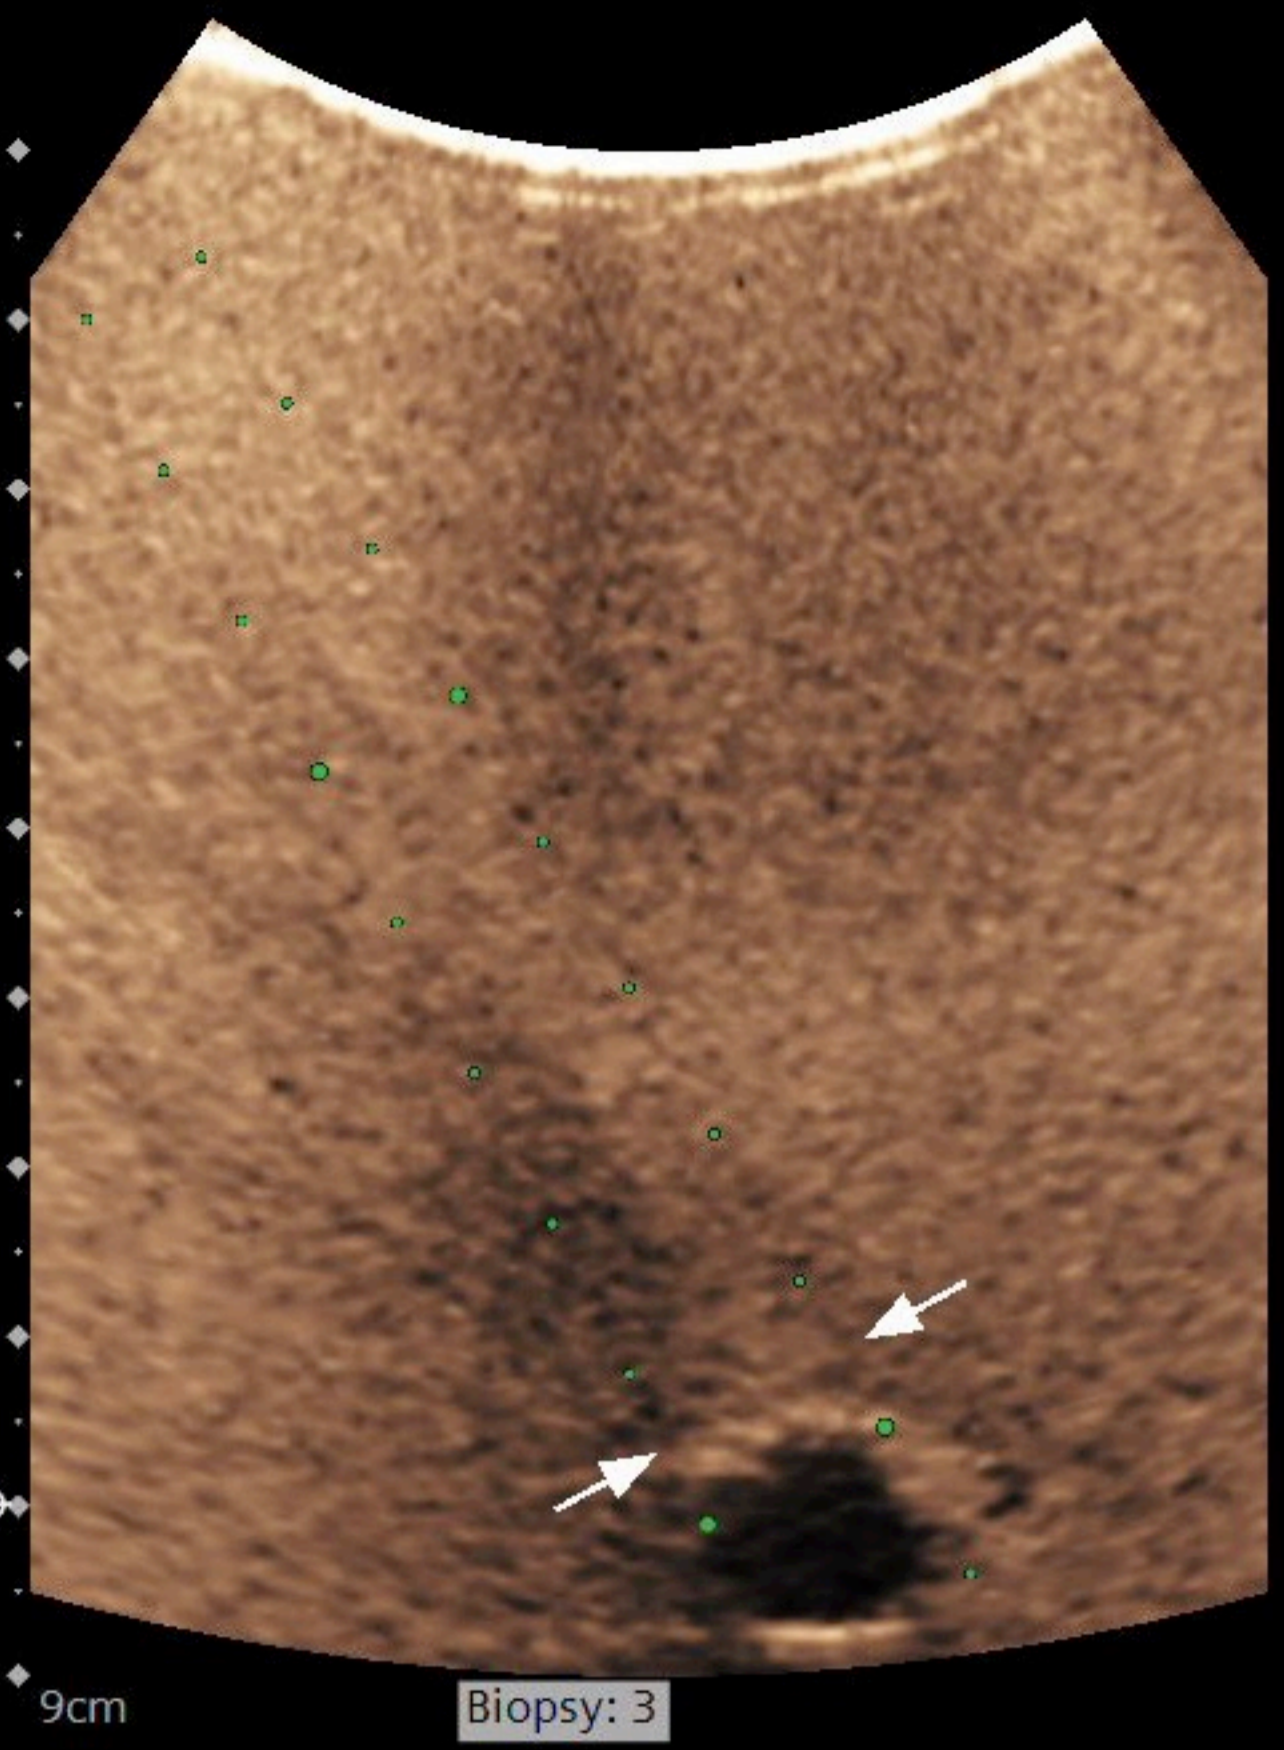

1st puncture

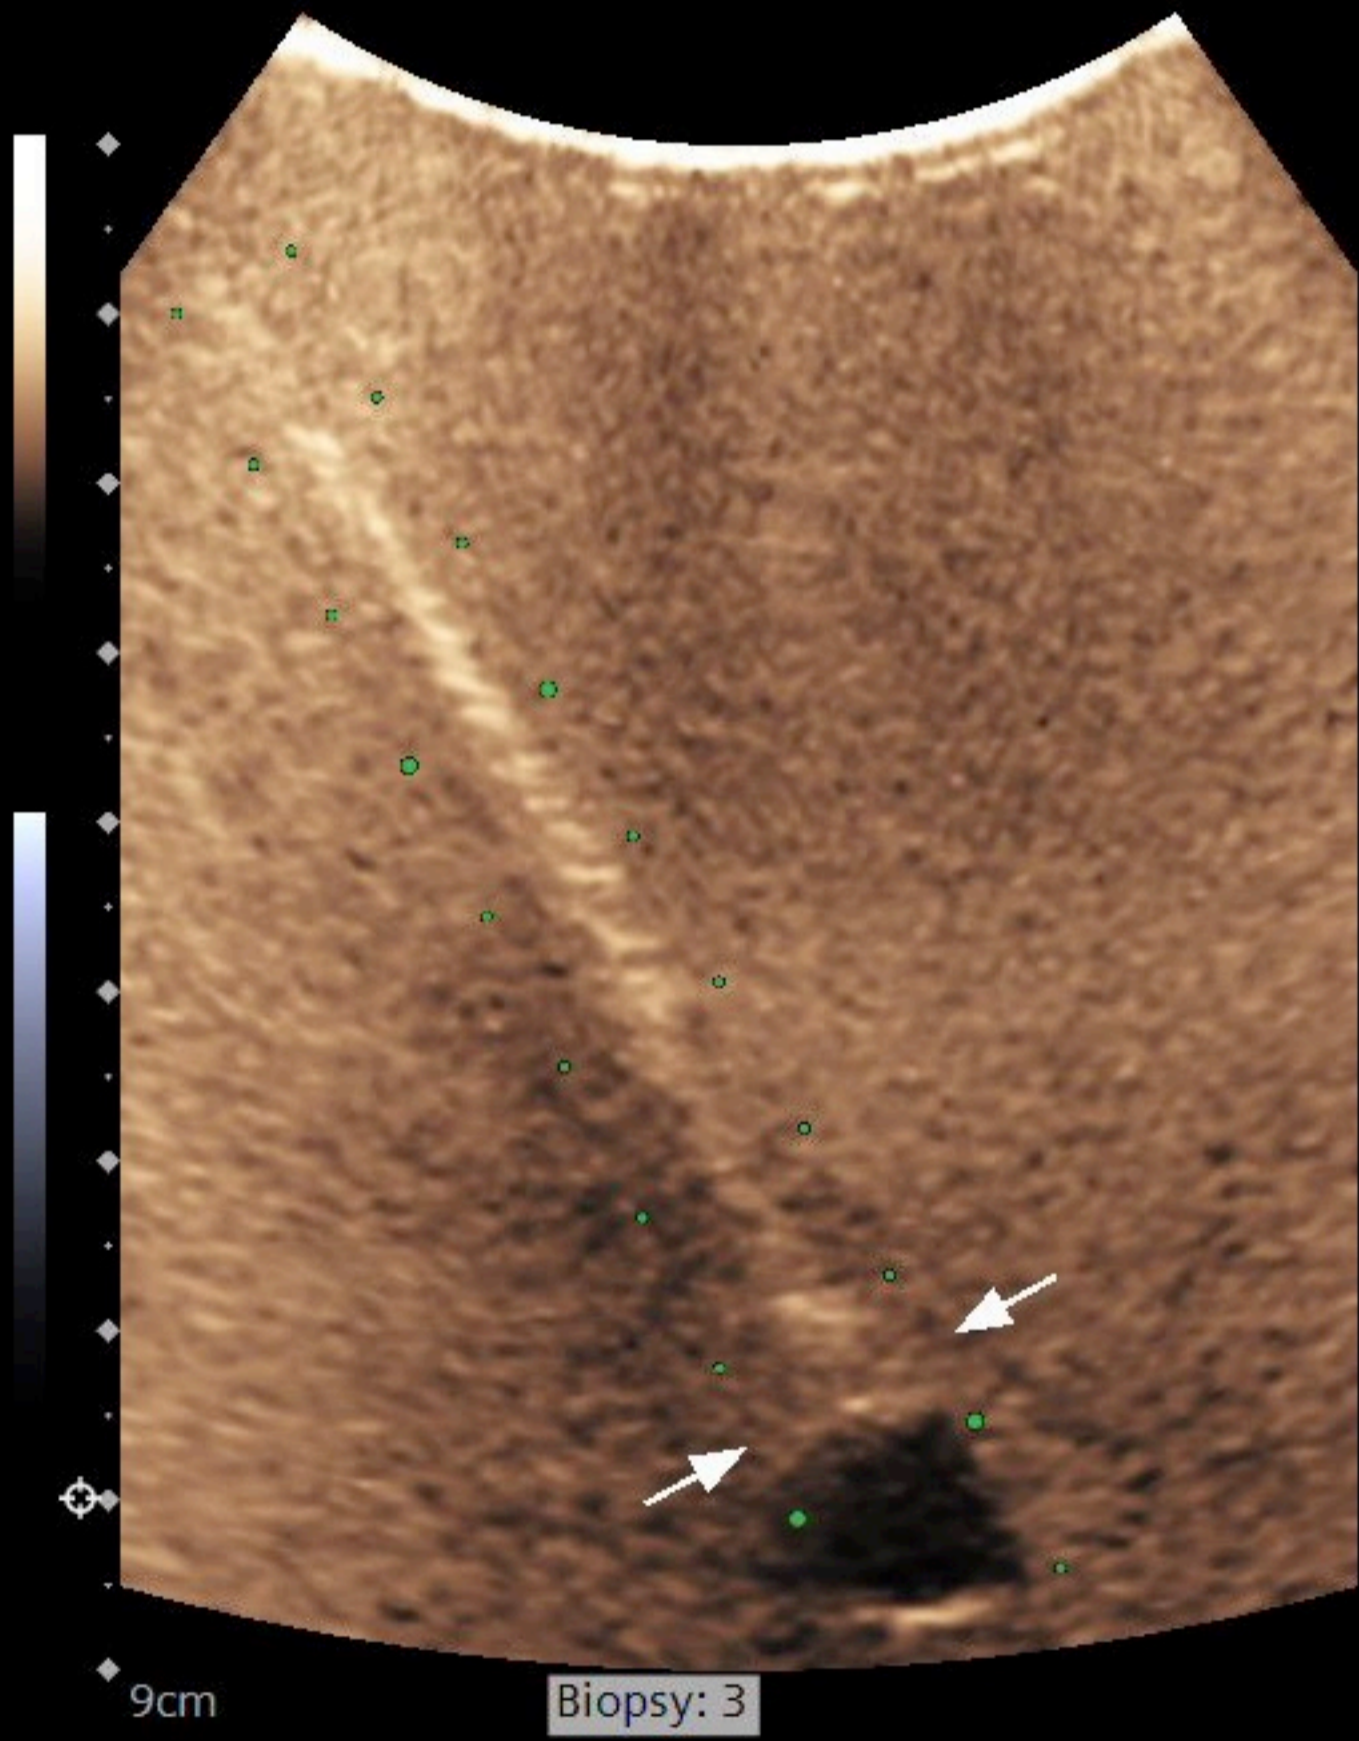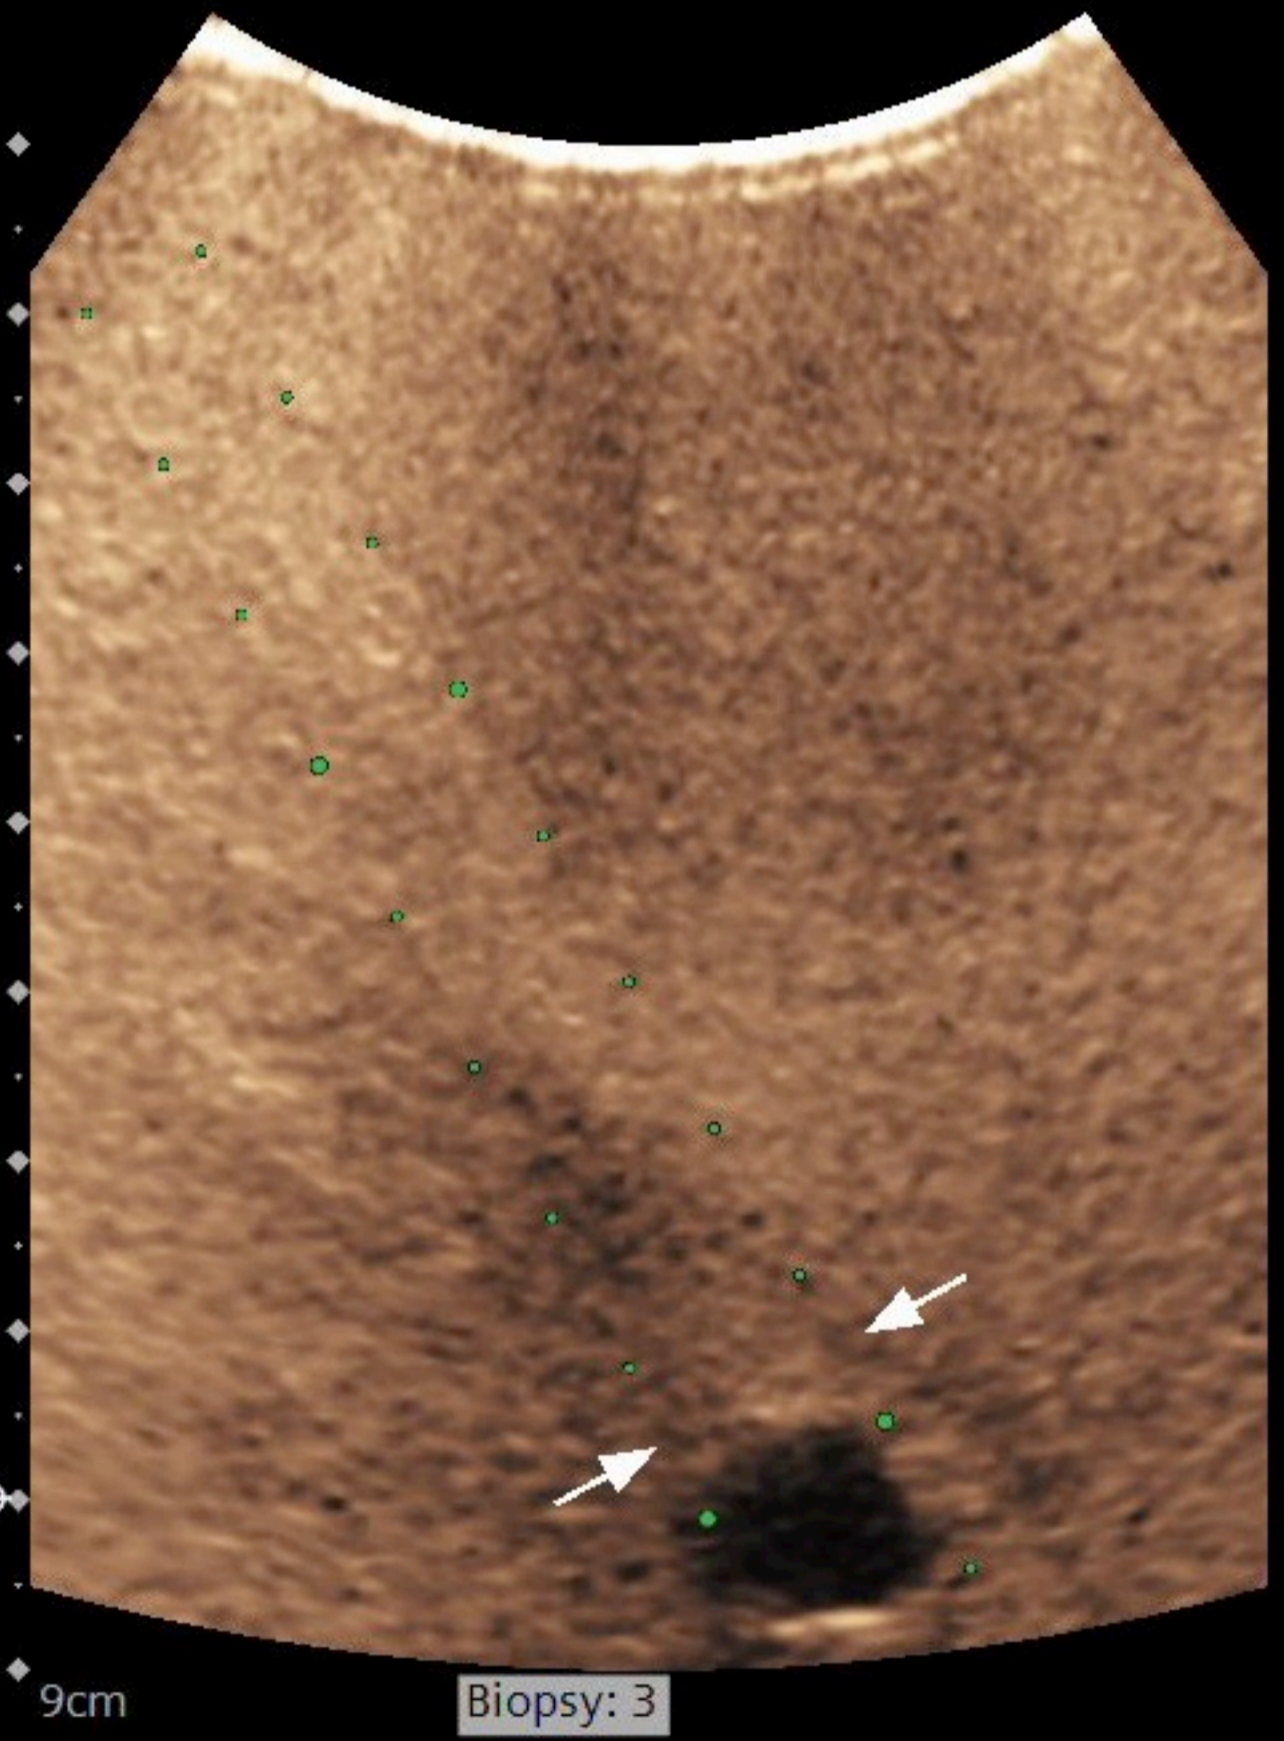

2nd puncture

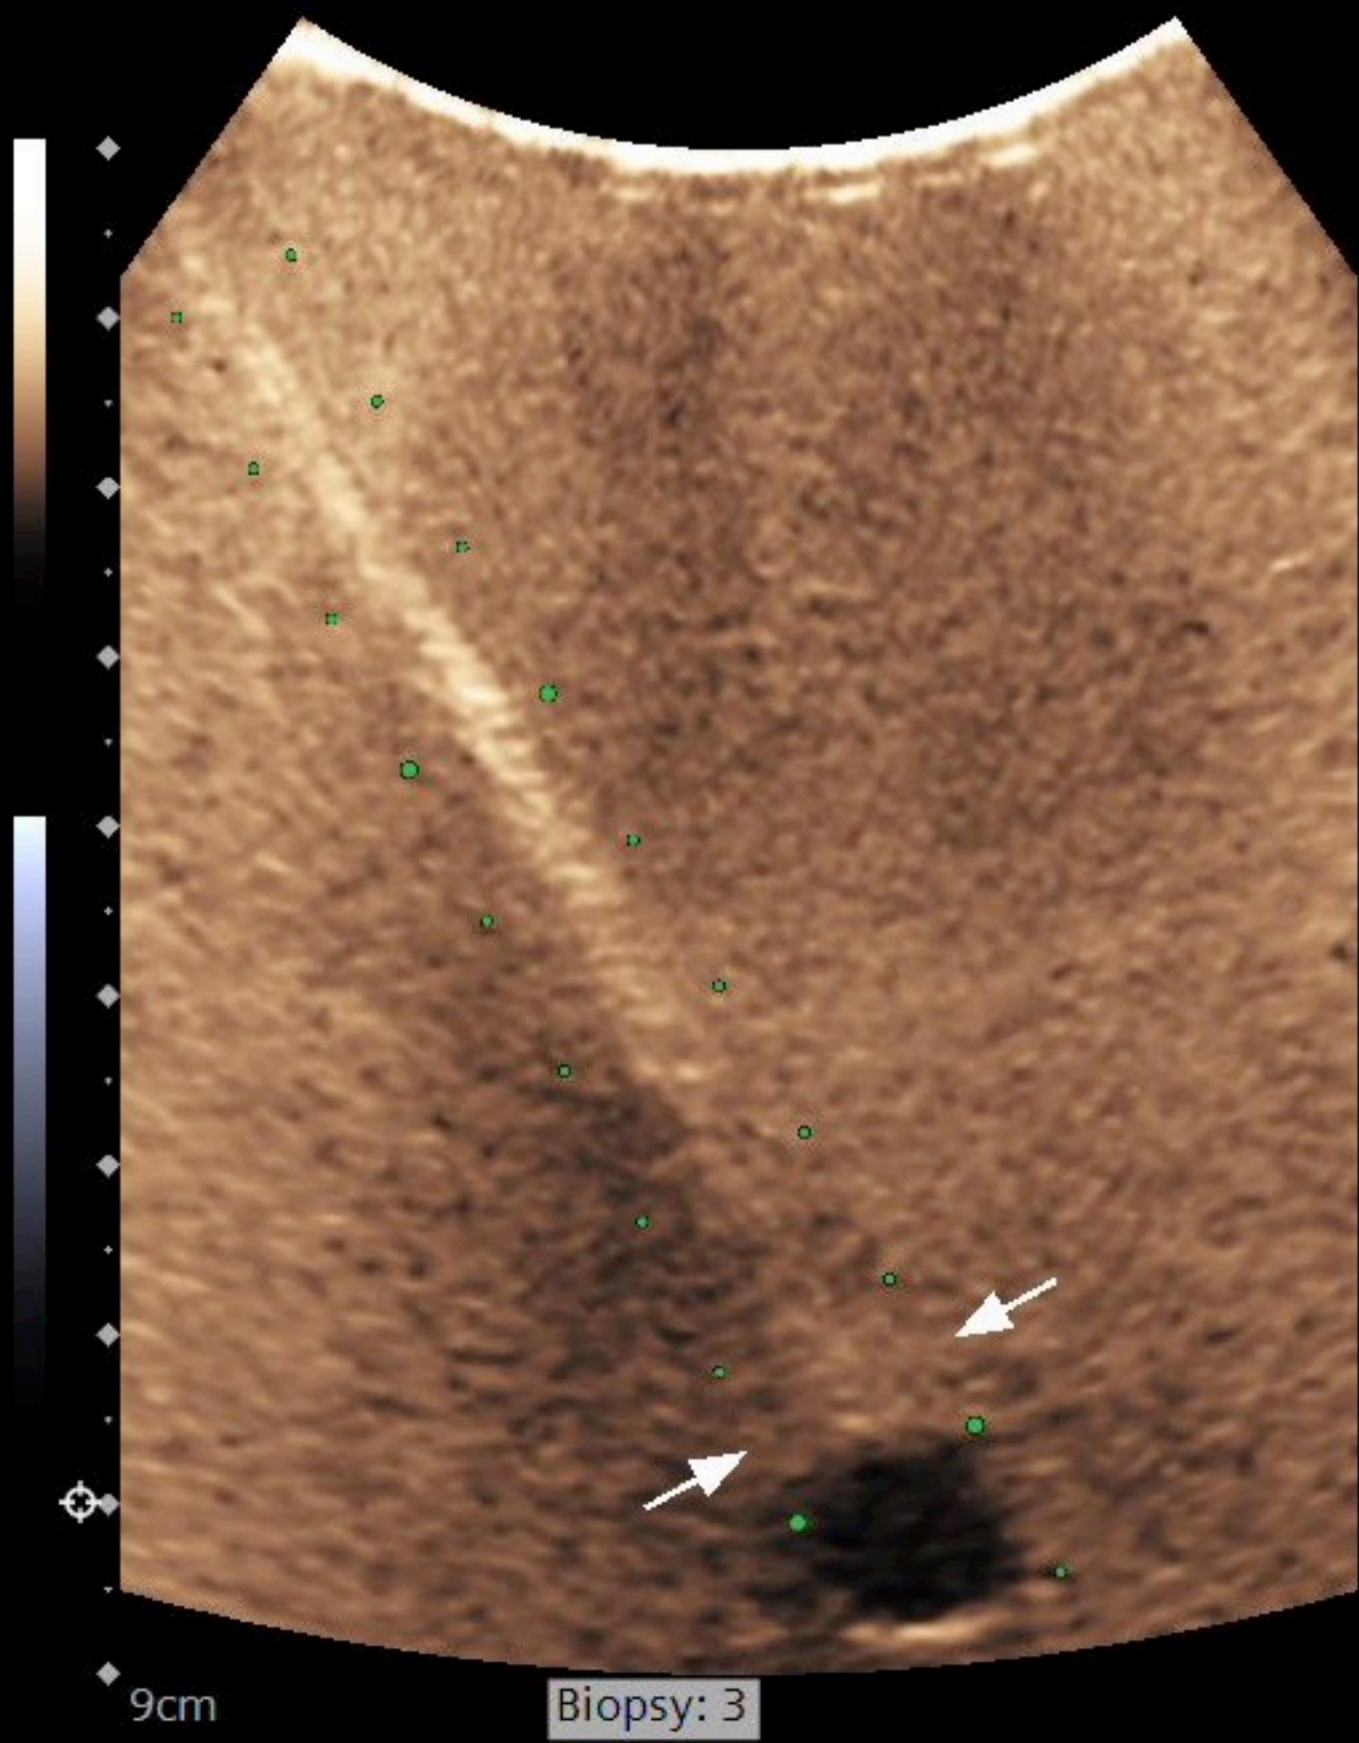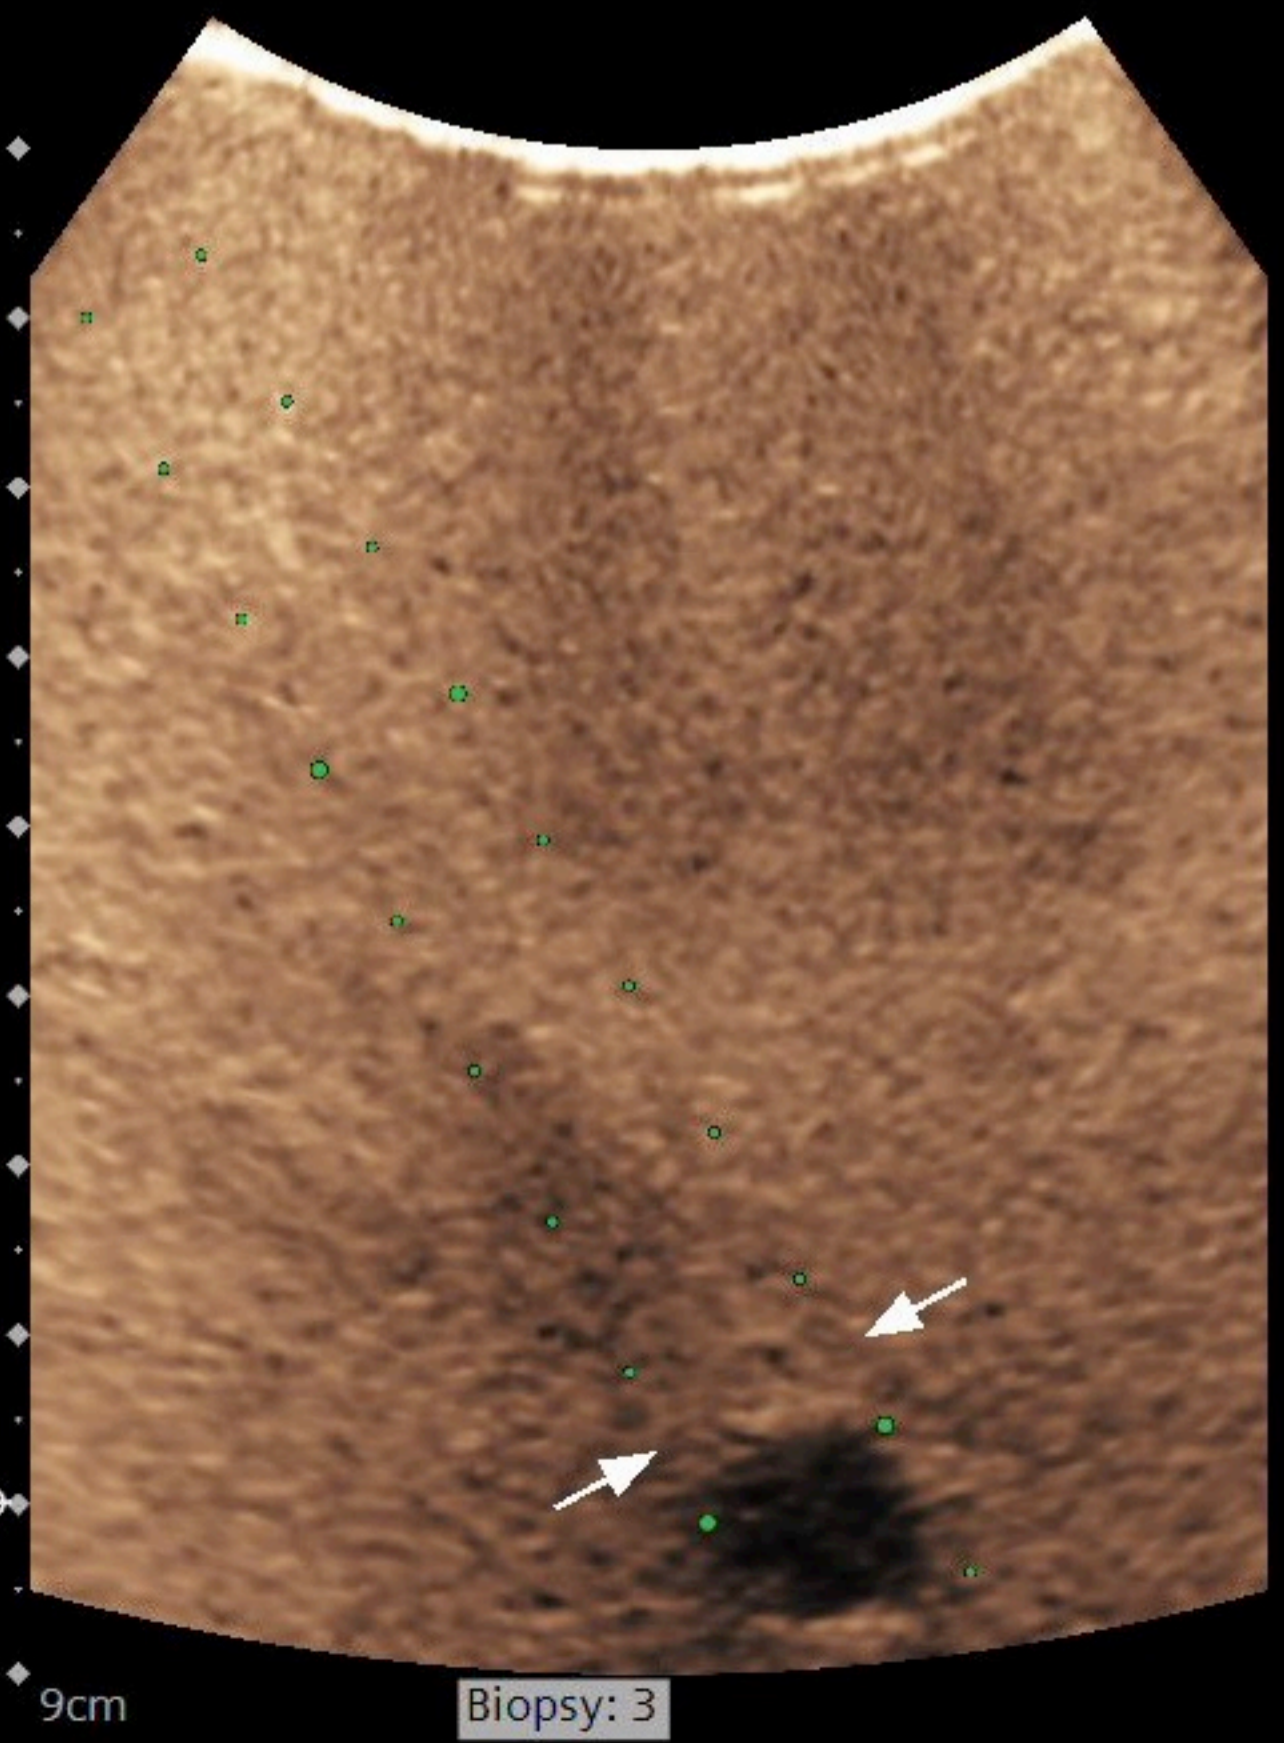

3rd puncture

Ultrasound contrast agent

Control



Side-notch biopsy needle (set 4/10)

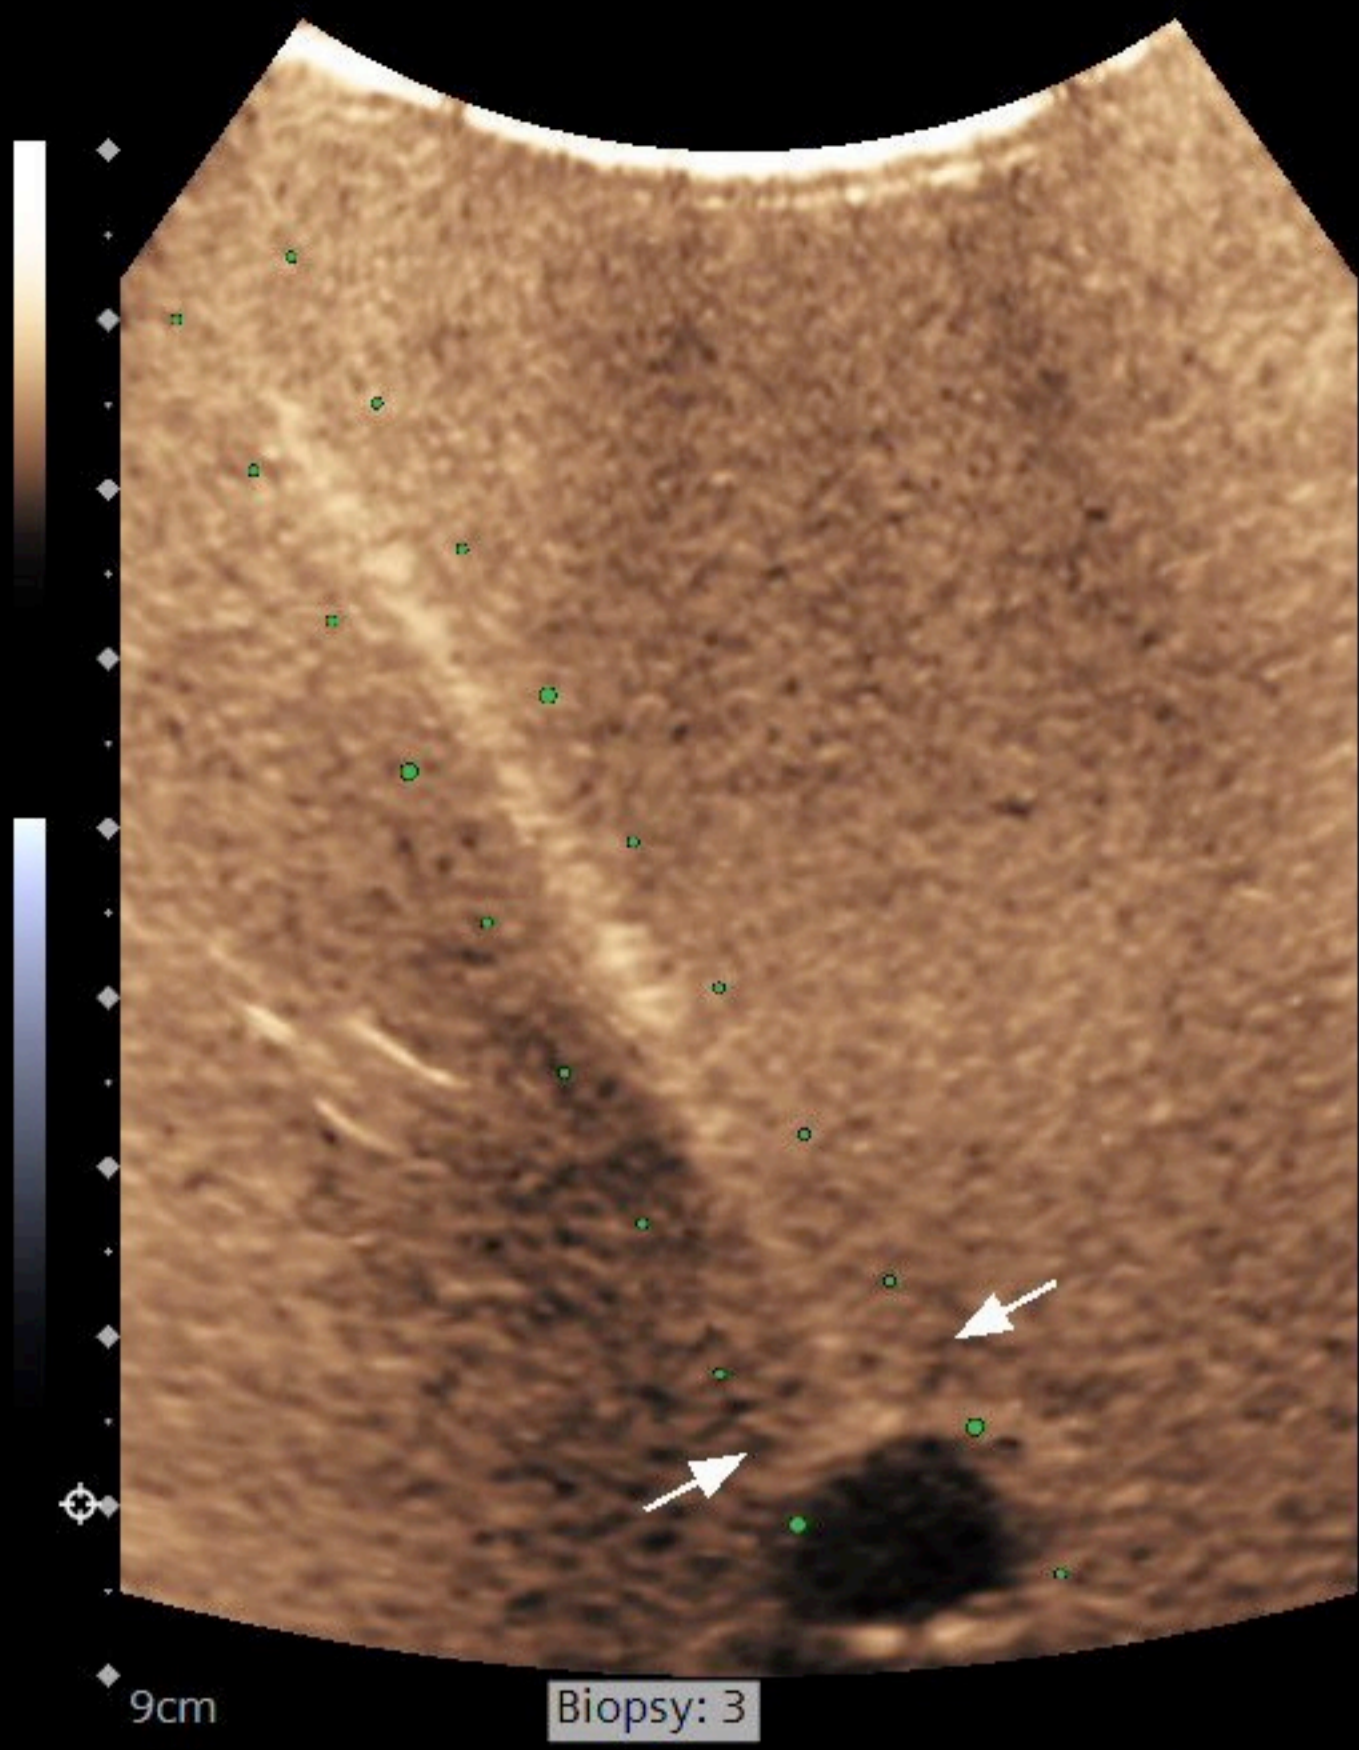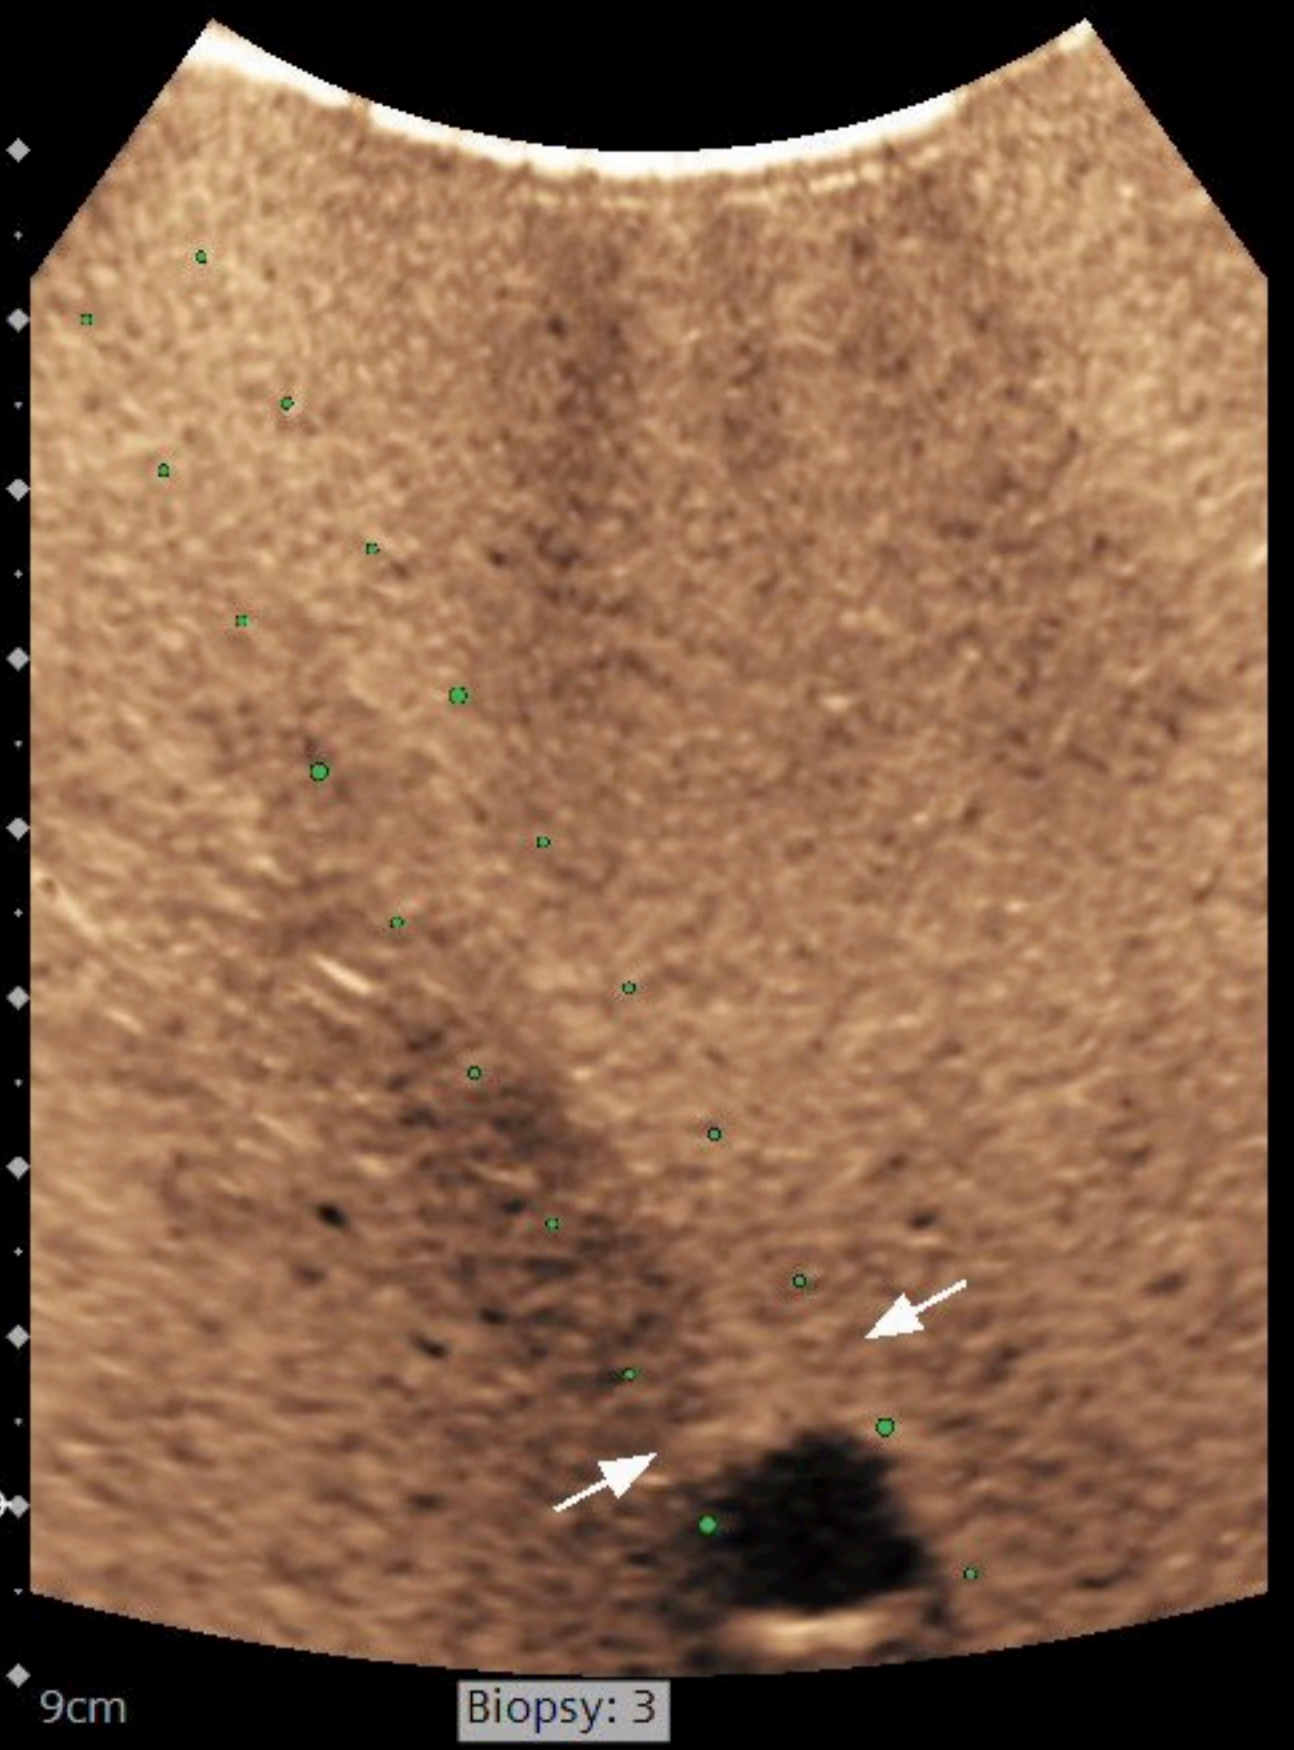

1st puncture

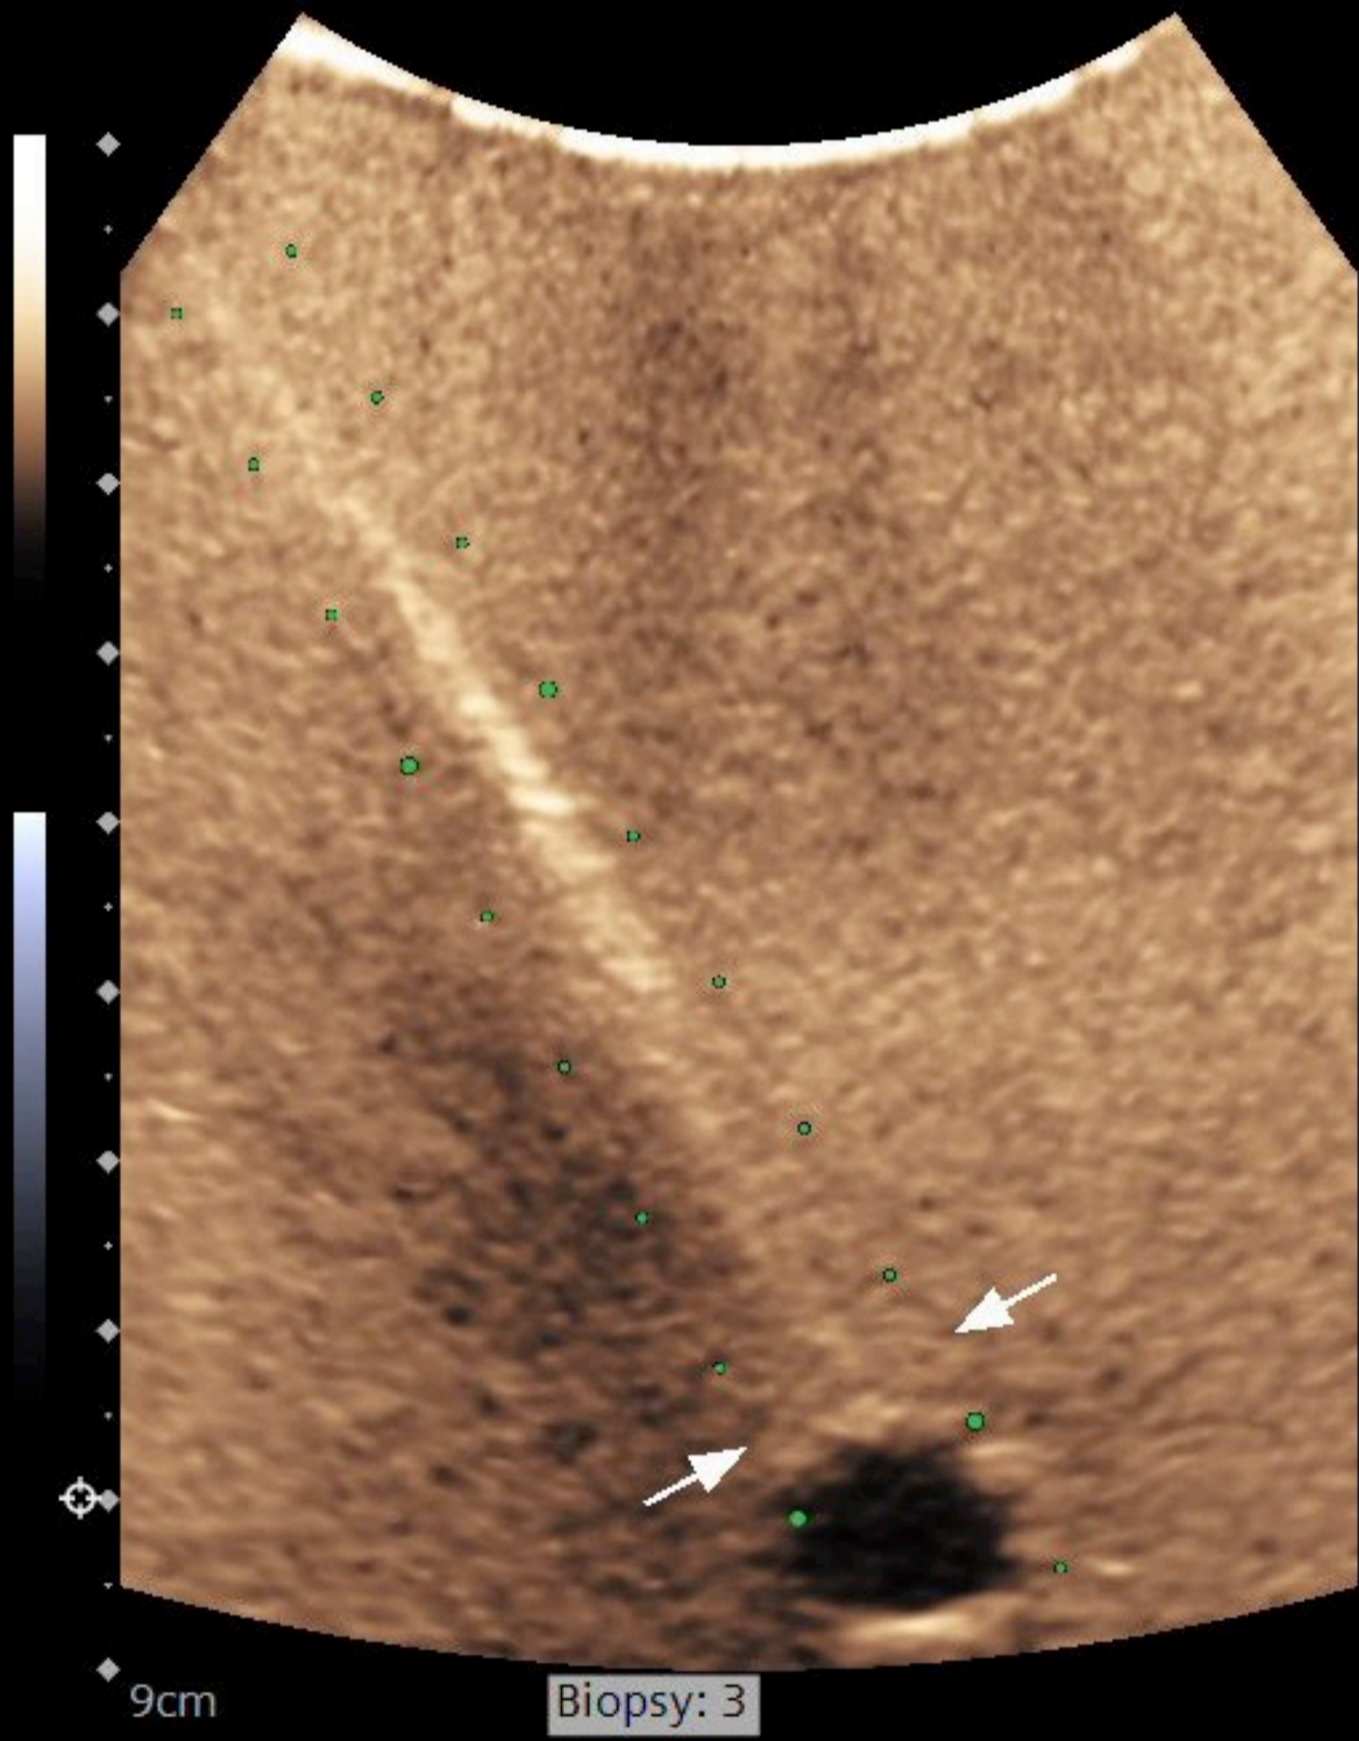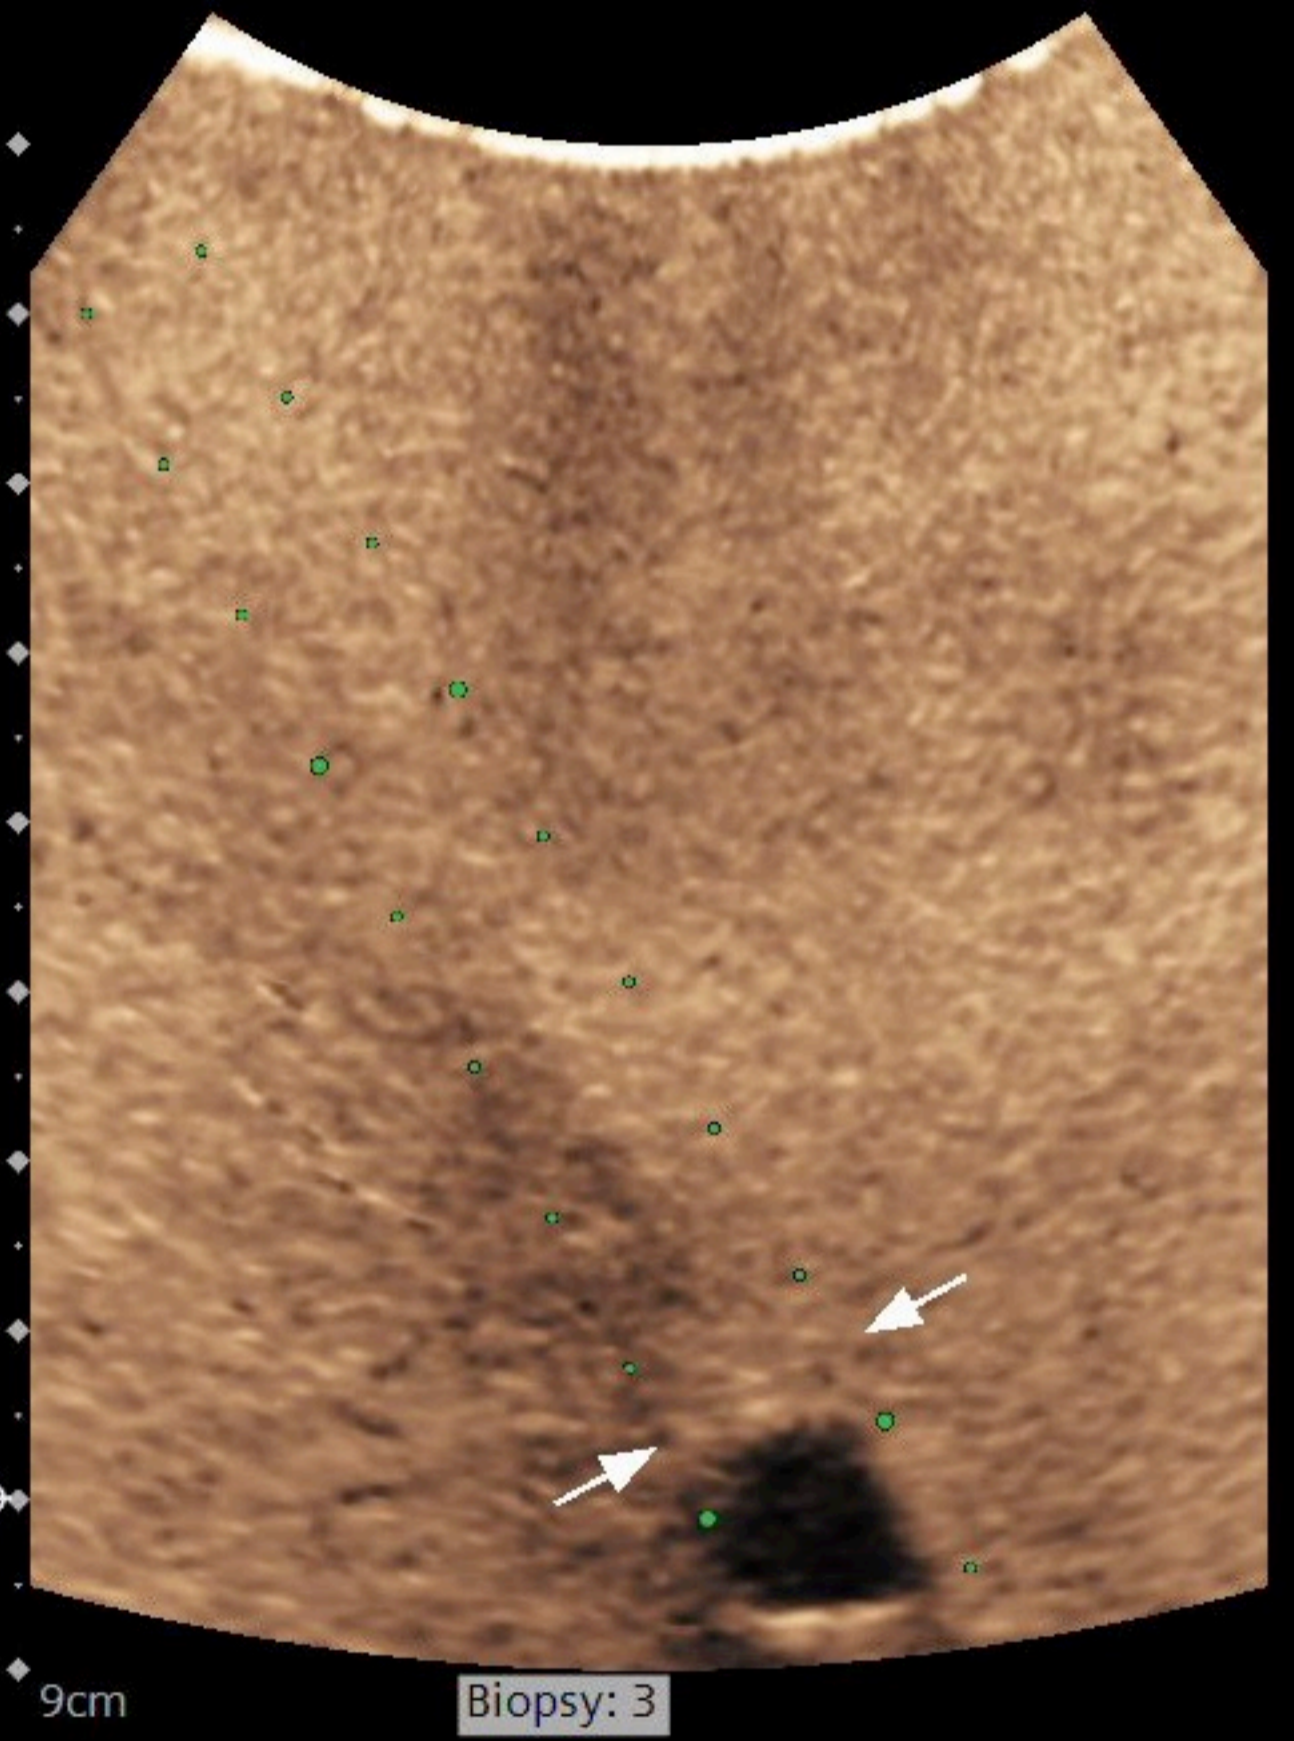

2nd puncture

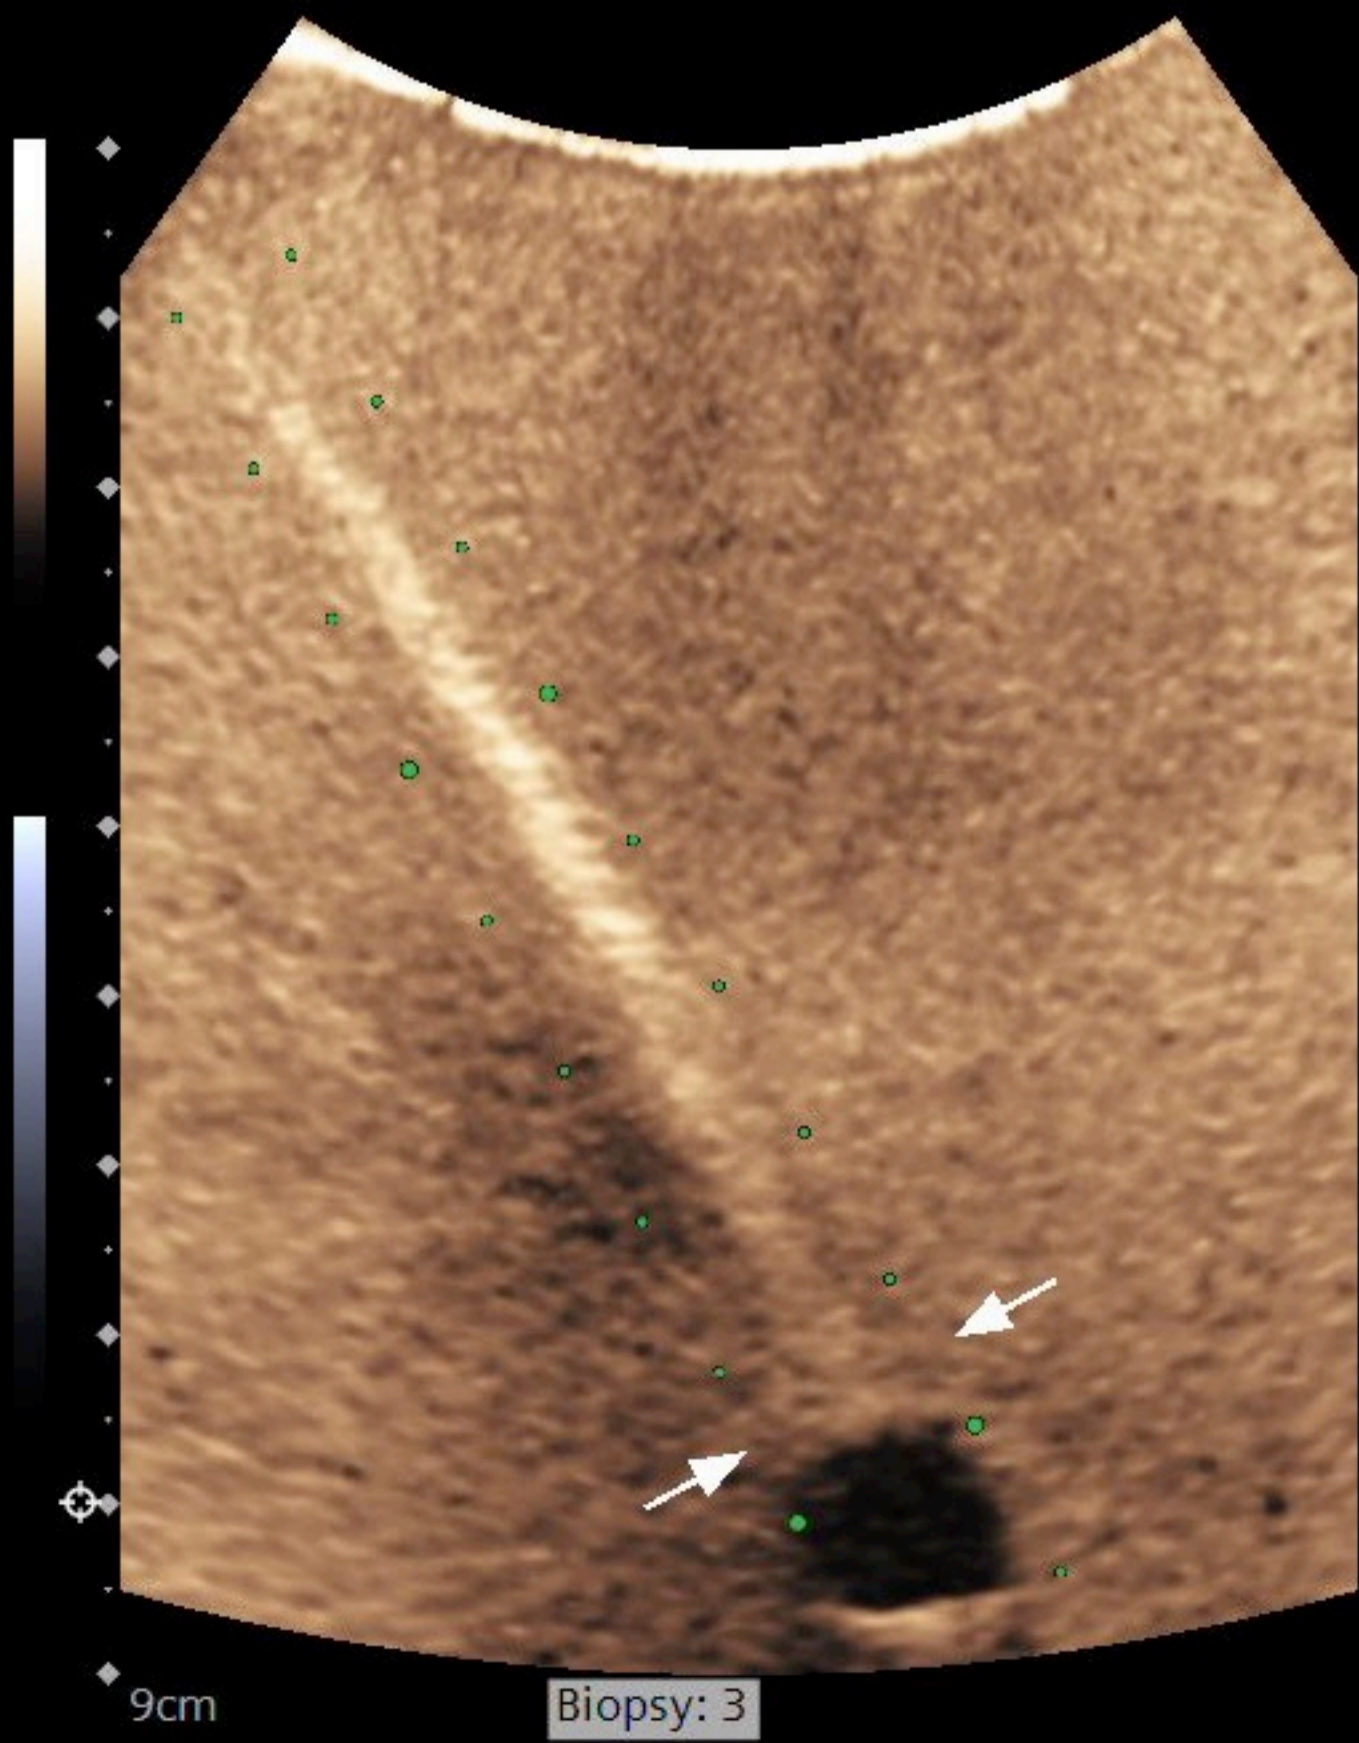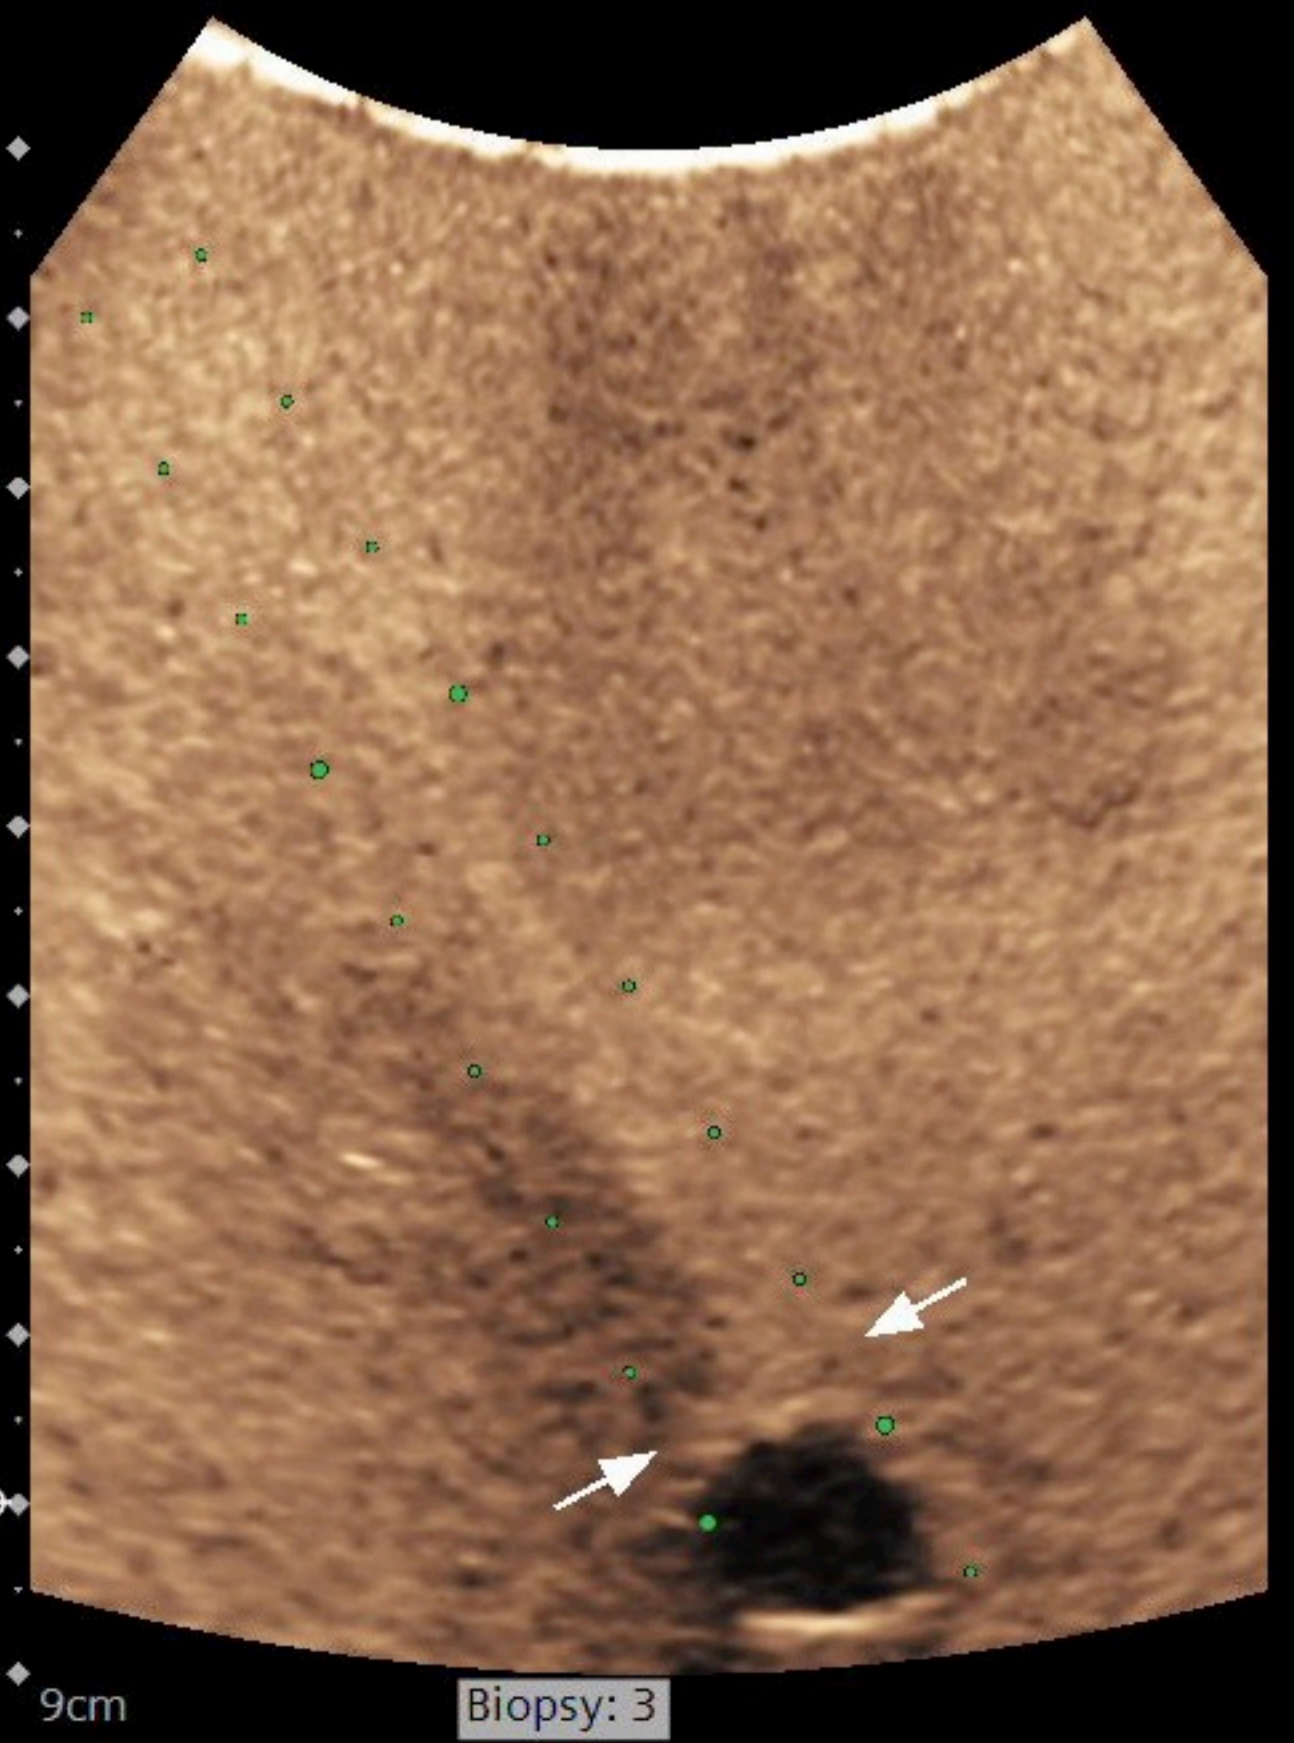

3rd puncture

Ultrasound contrast agent

Control



Side-notch biopsy needle (set 5/10)

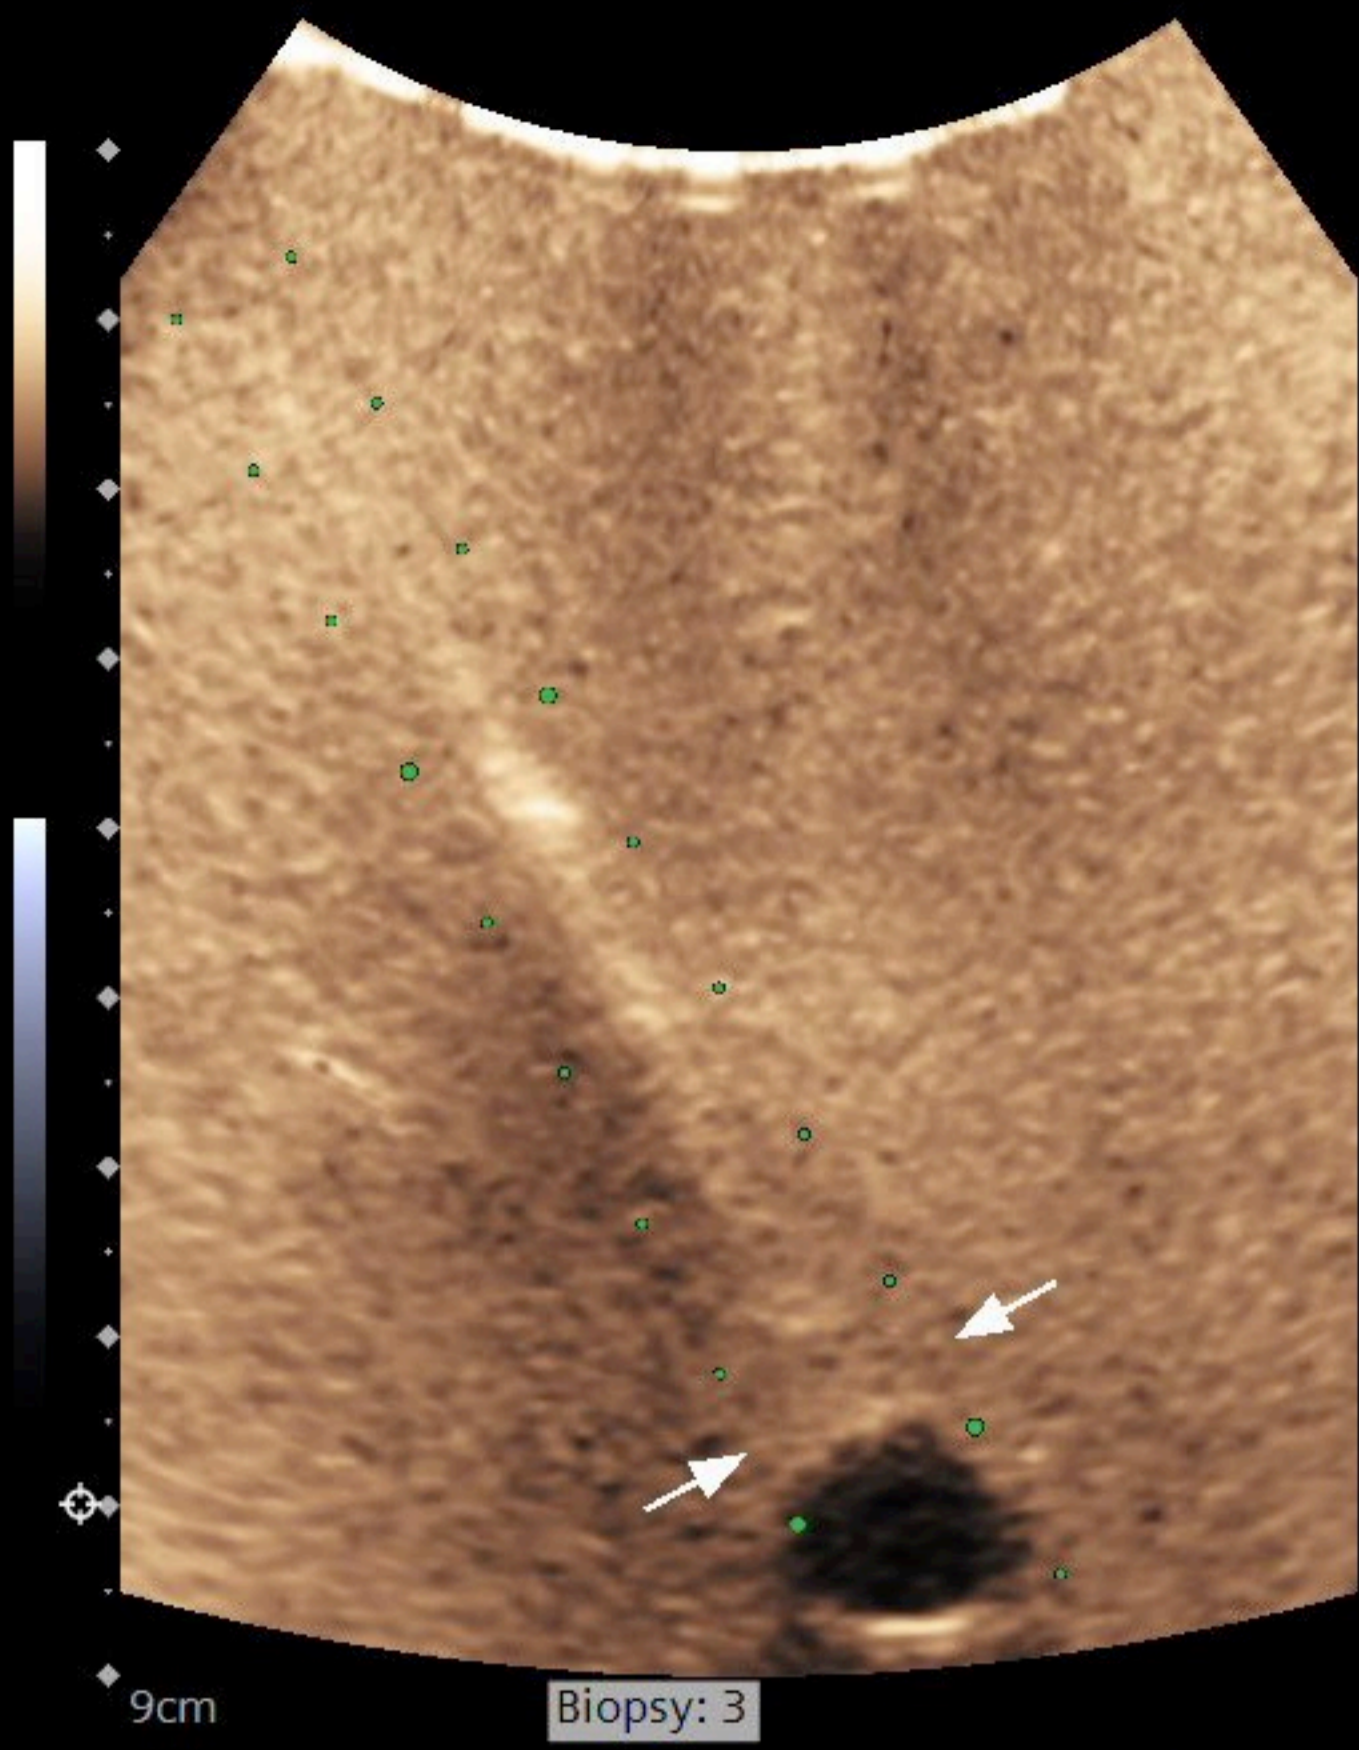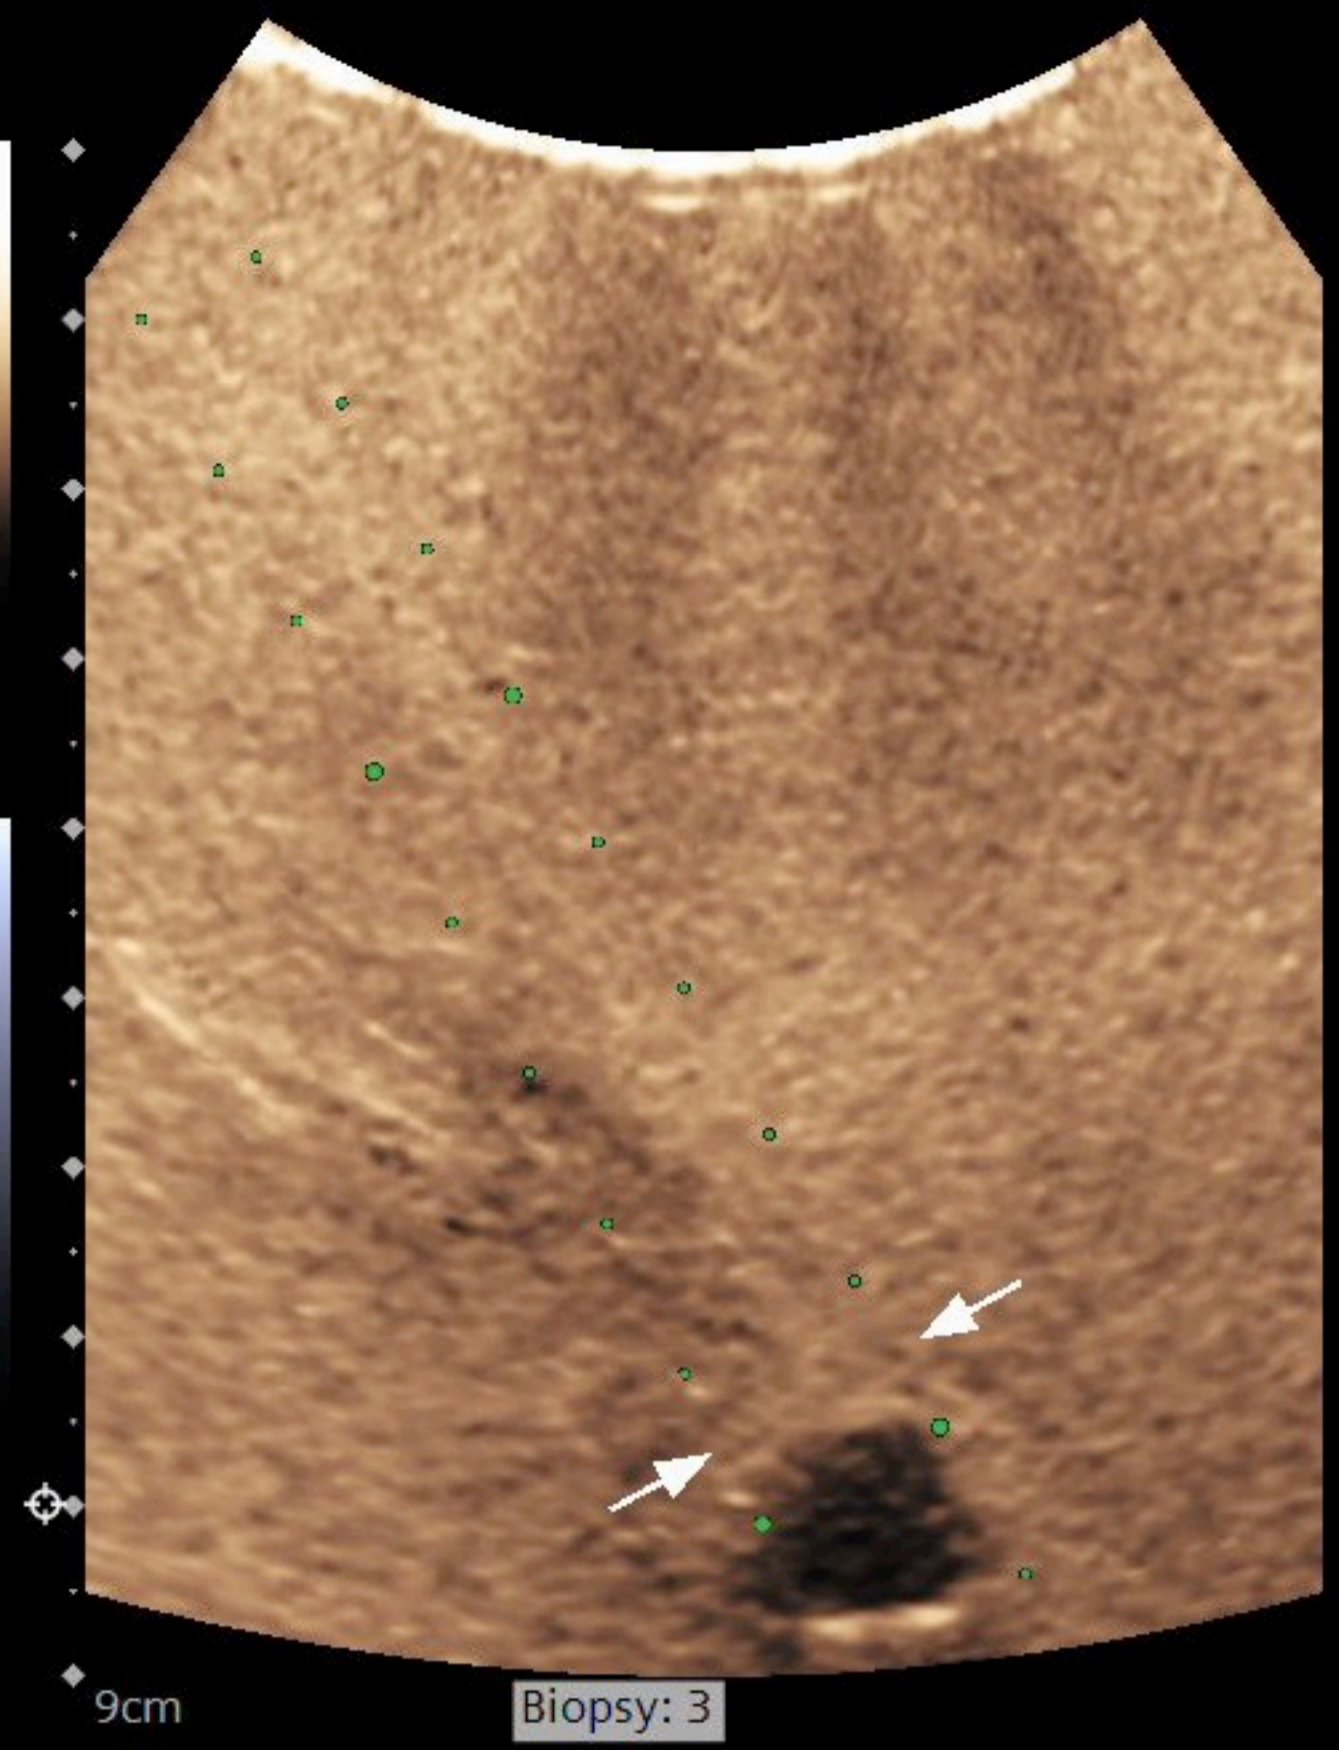

1st puncture

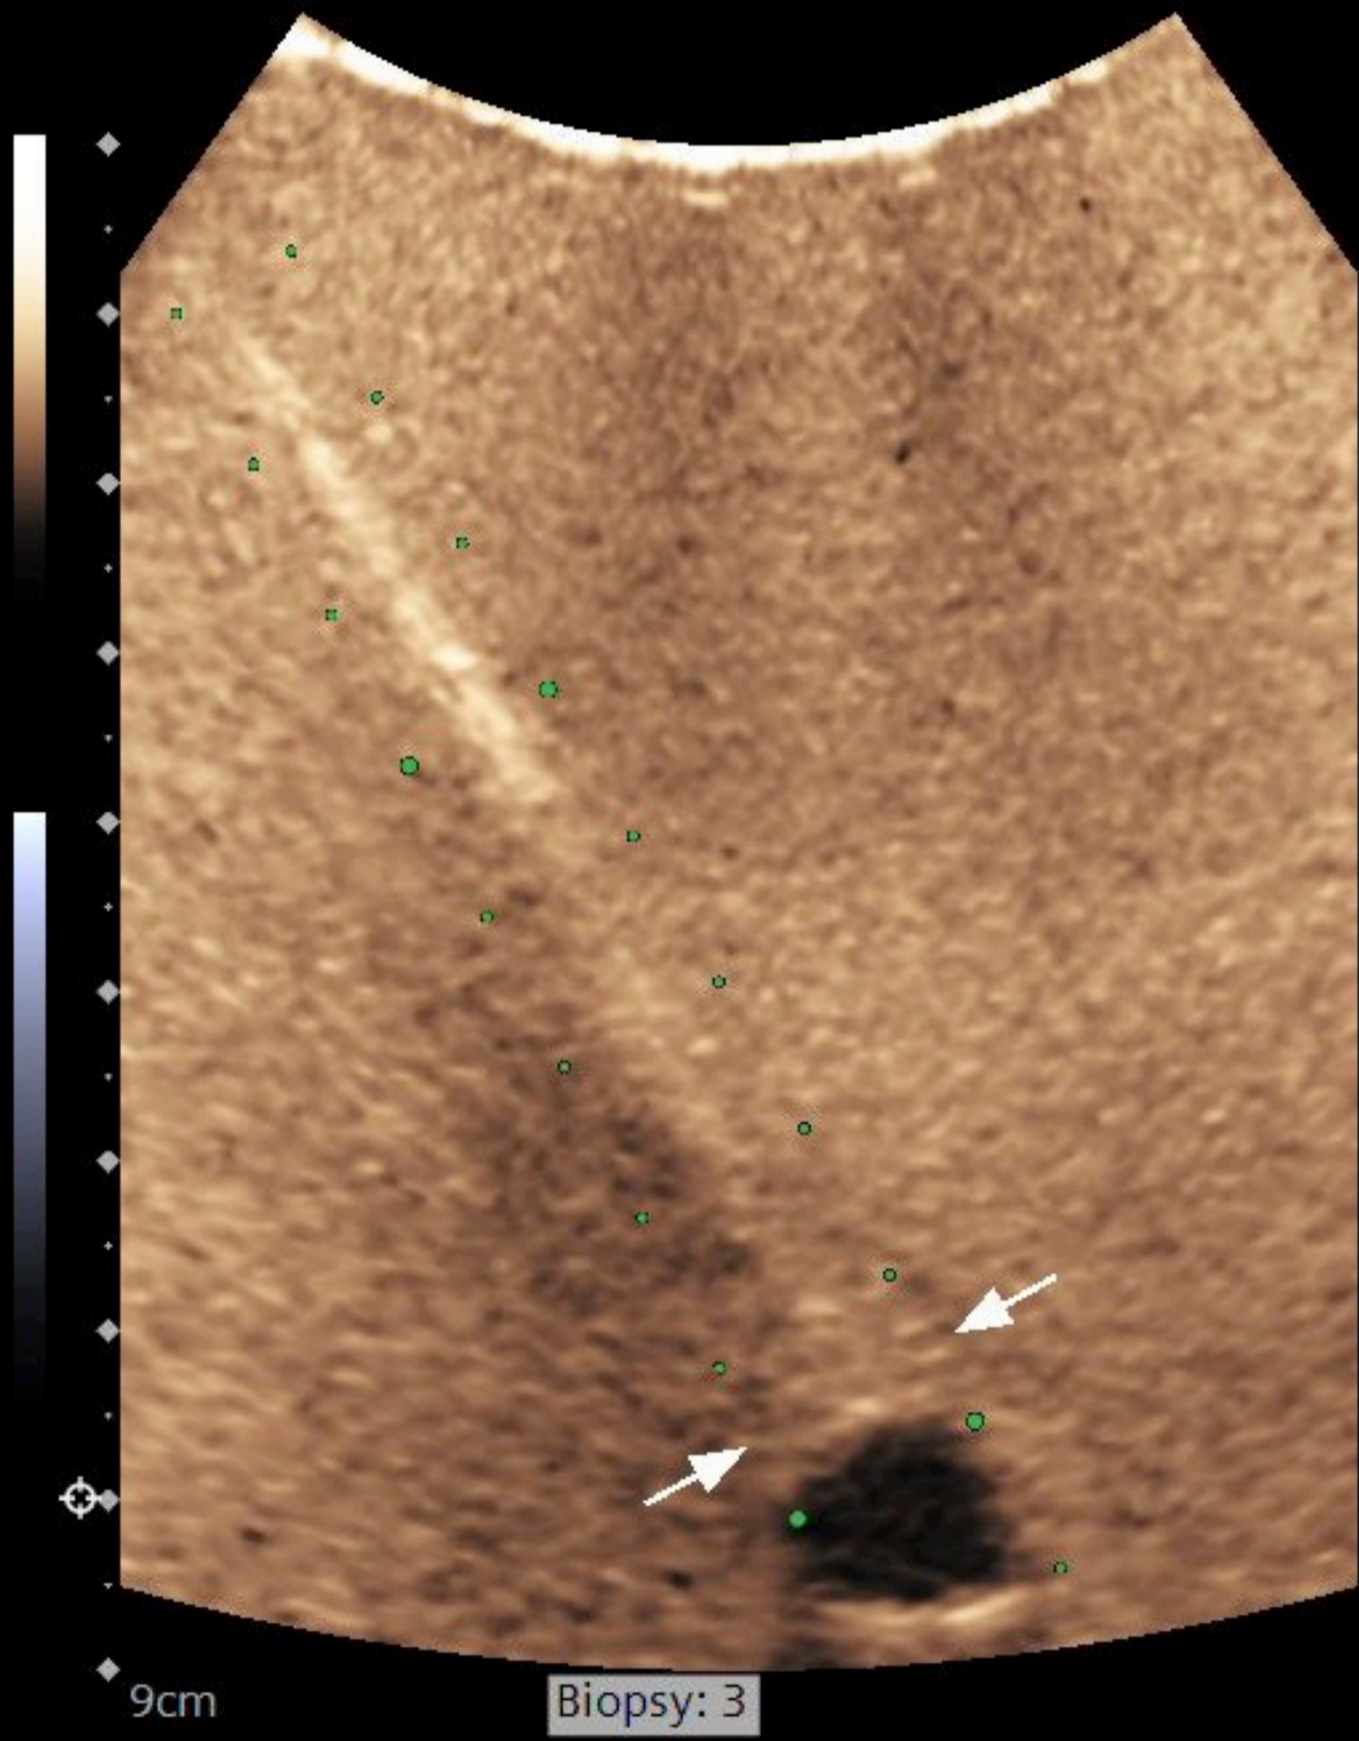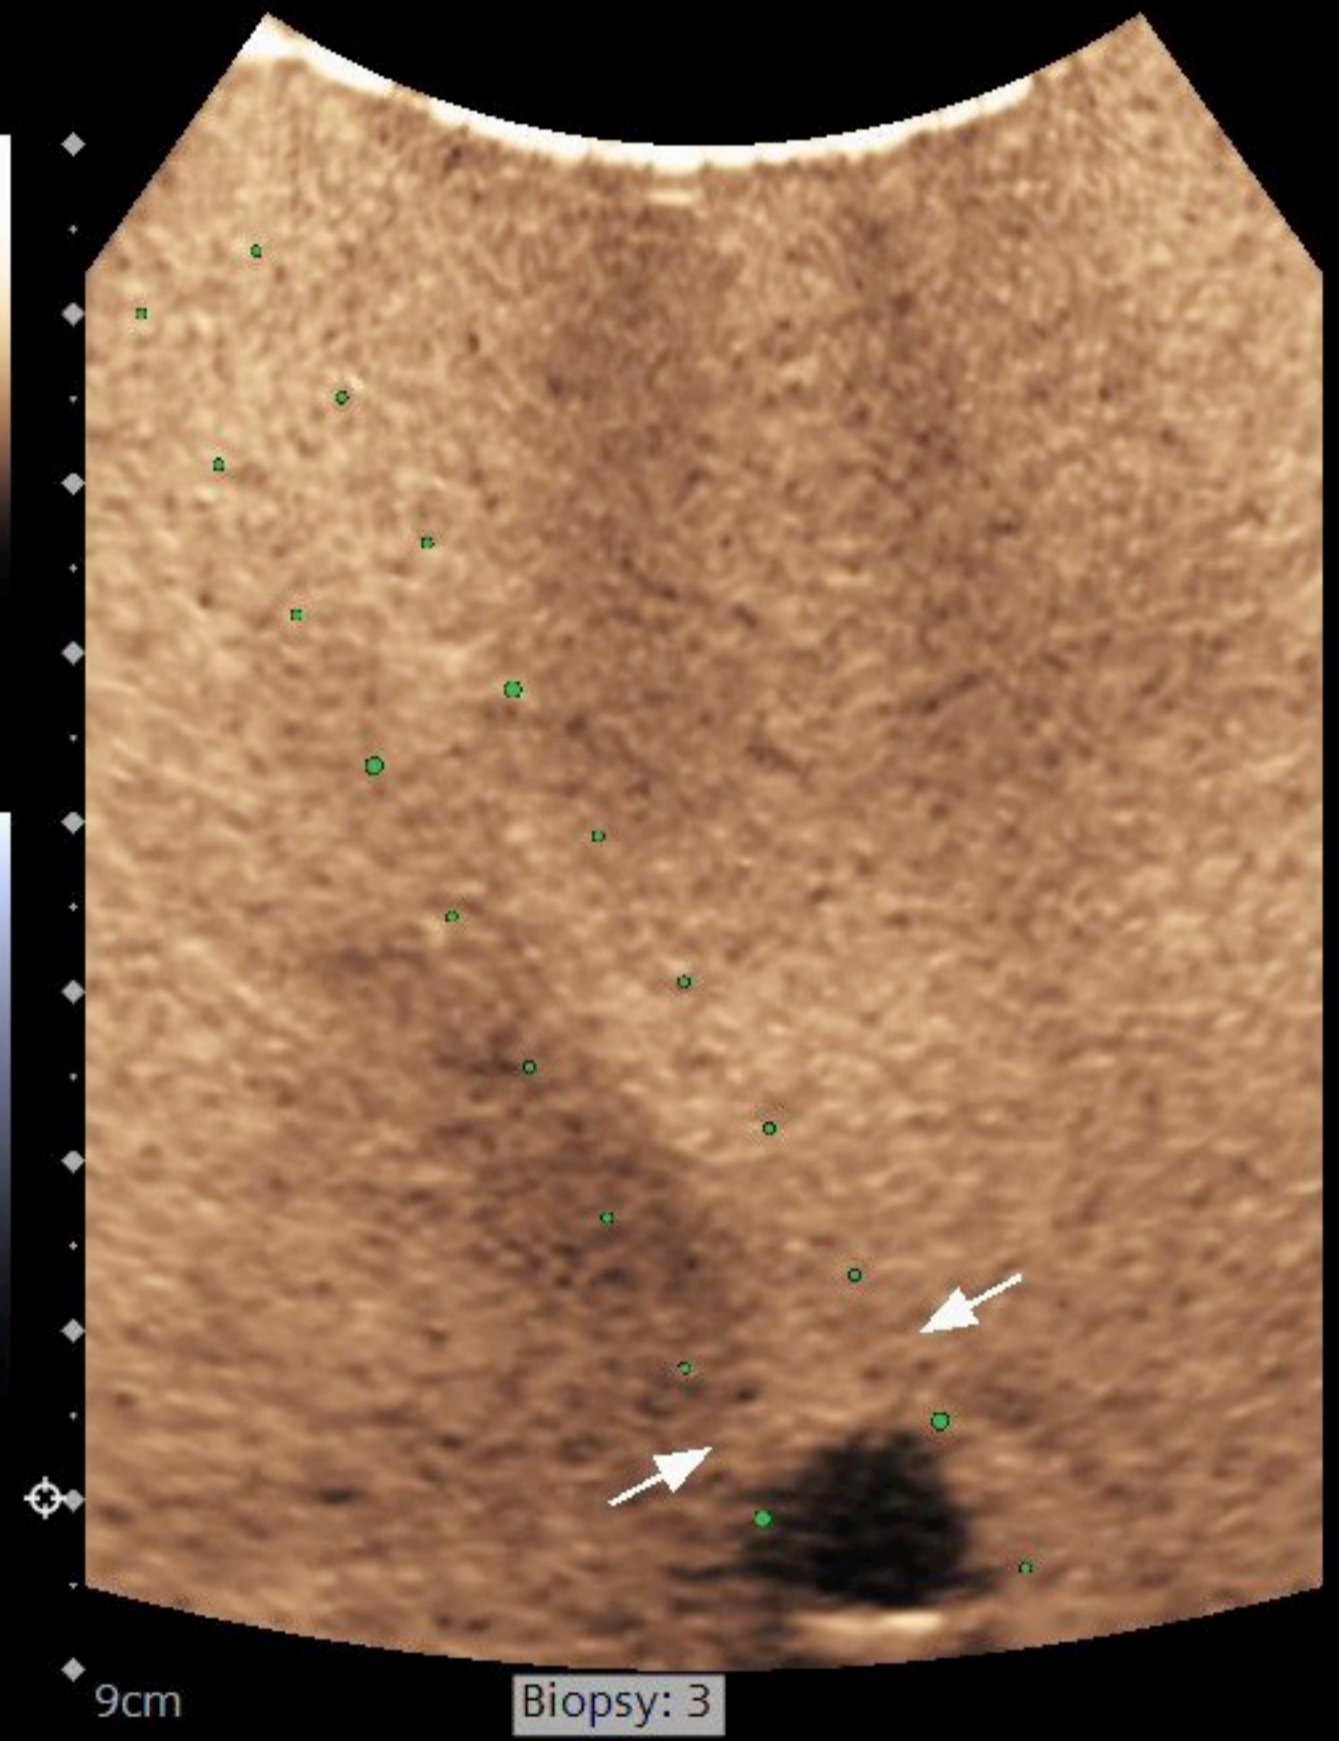

2nd puncture

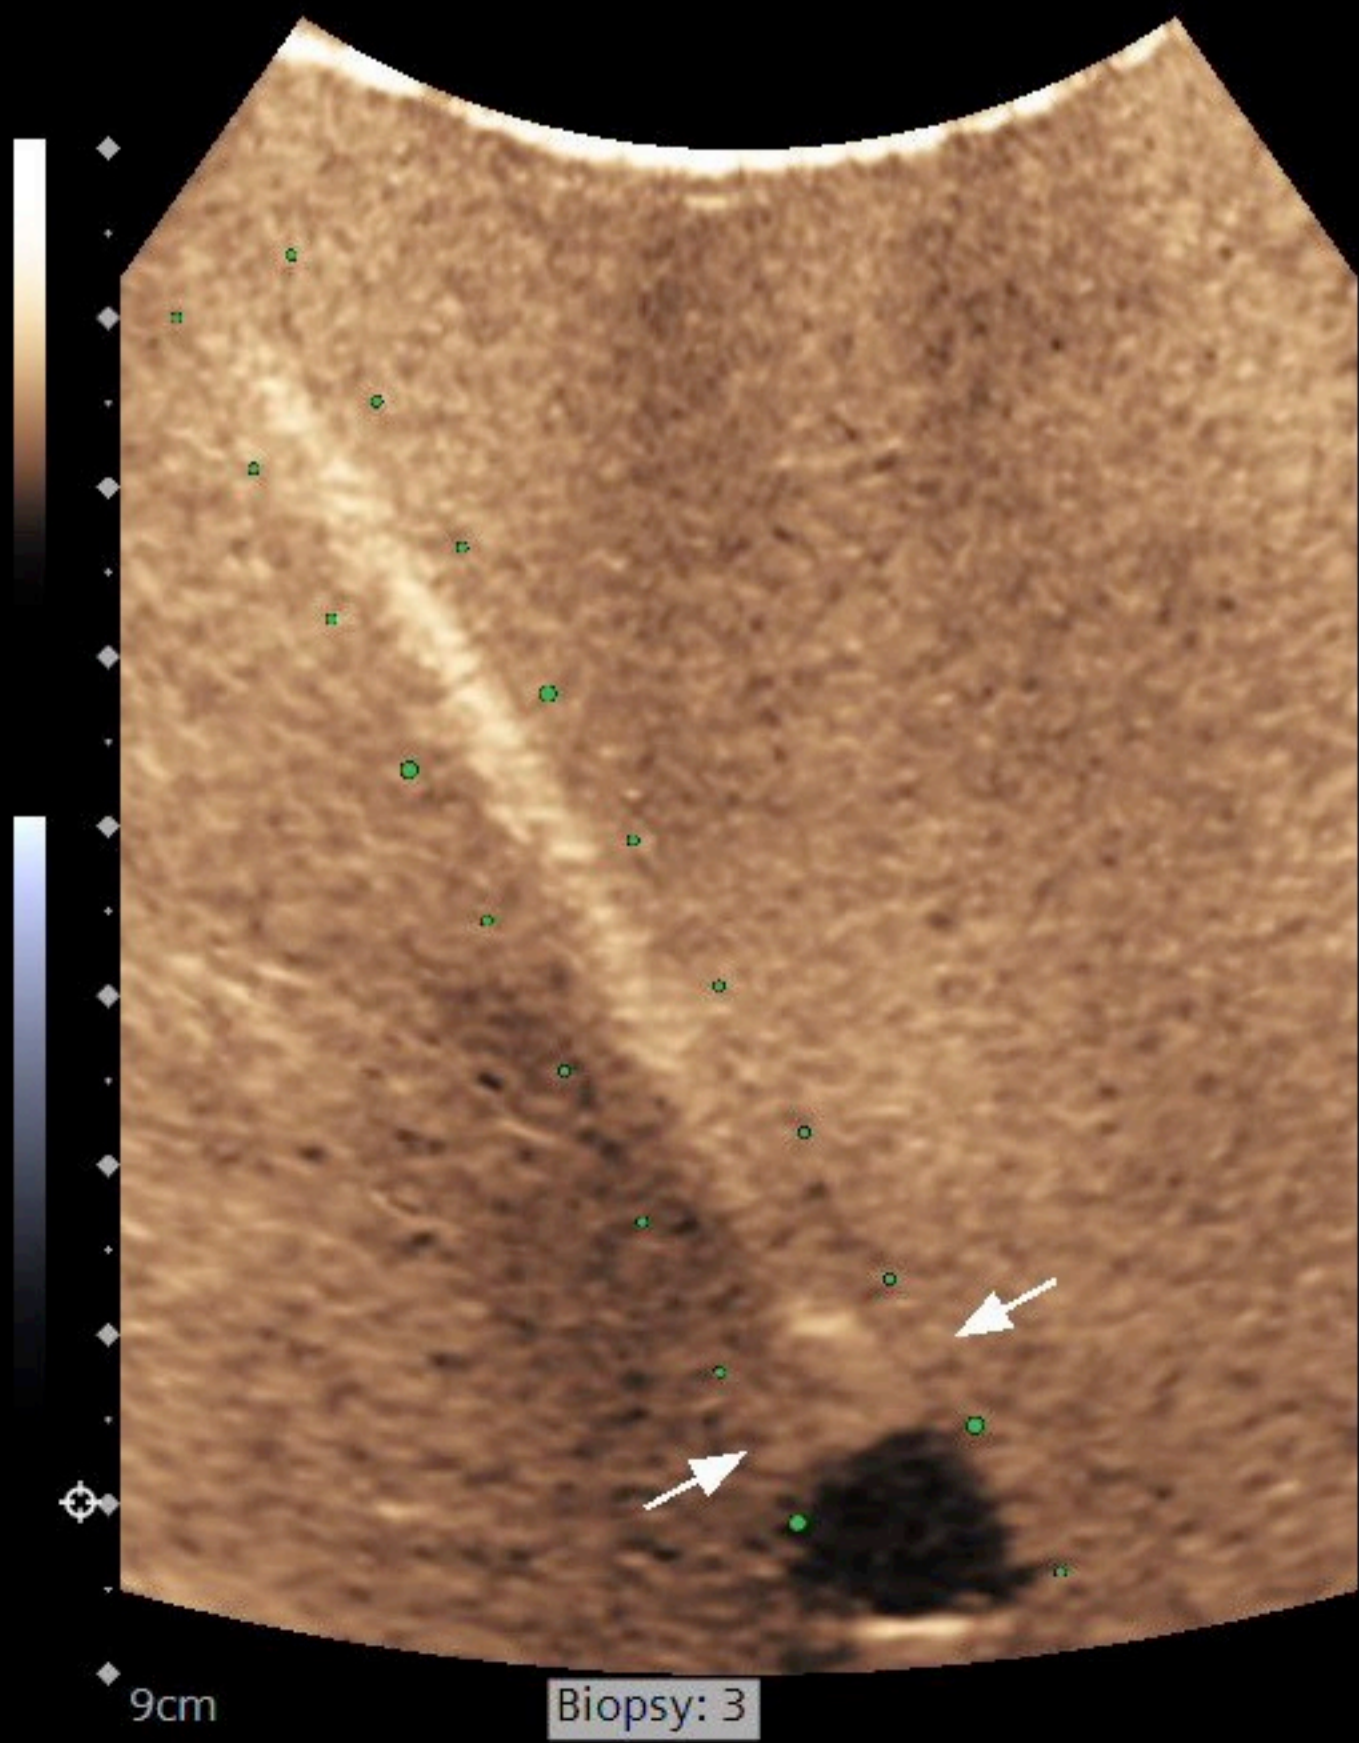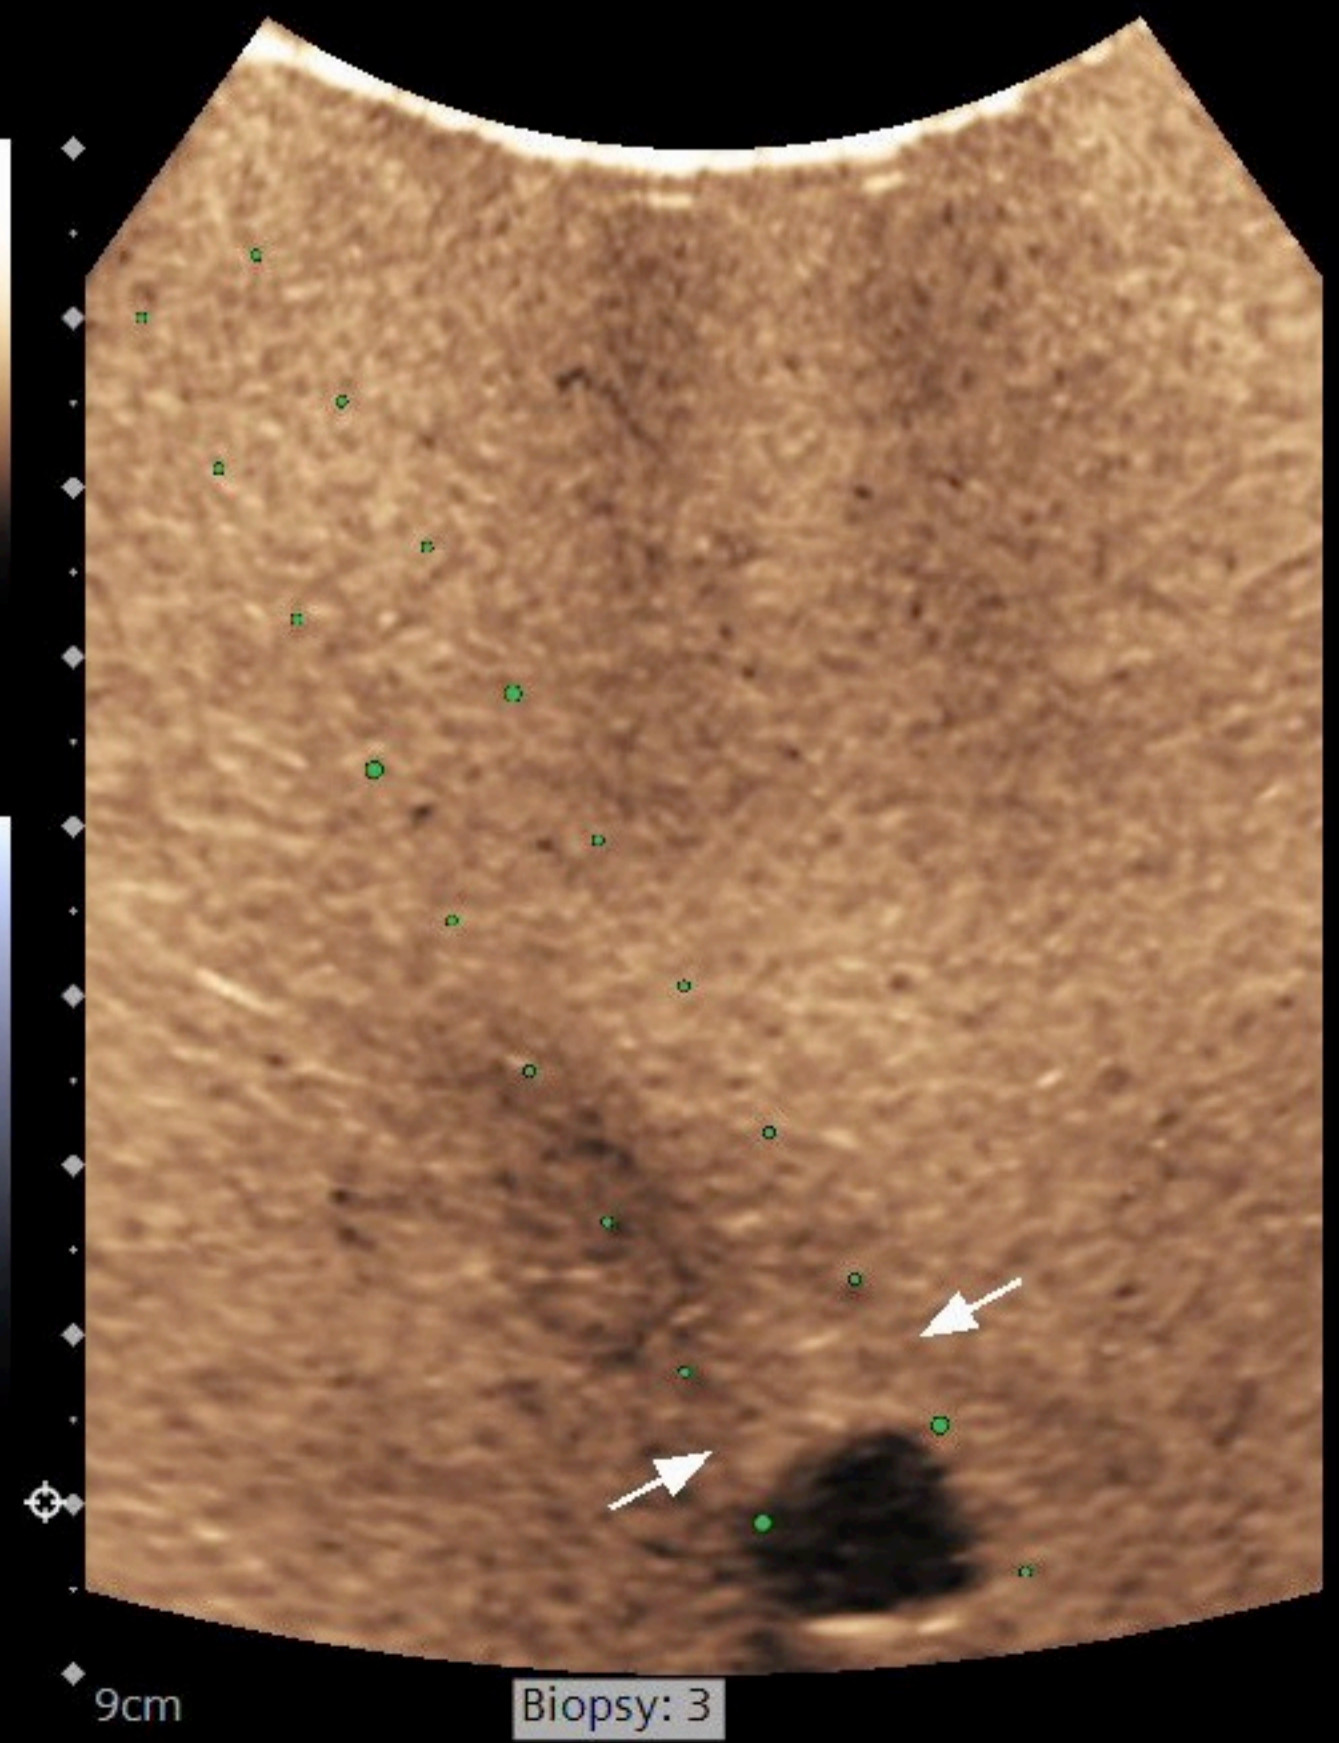

3rd puncture

Ultrasound contrast agent

Control



Side-notch biopsy needle (set 6/10)

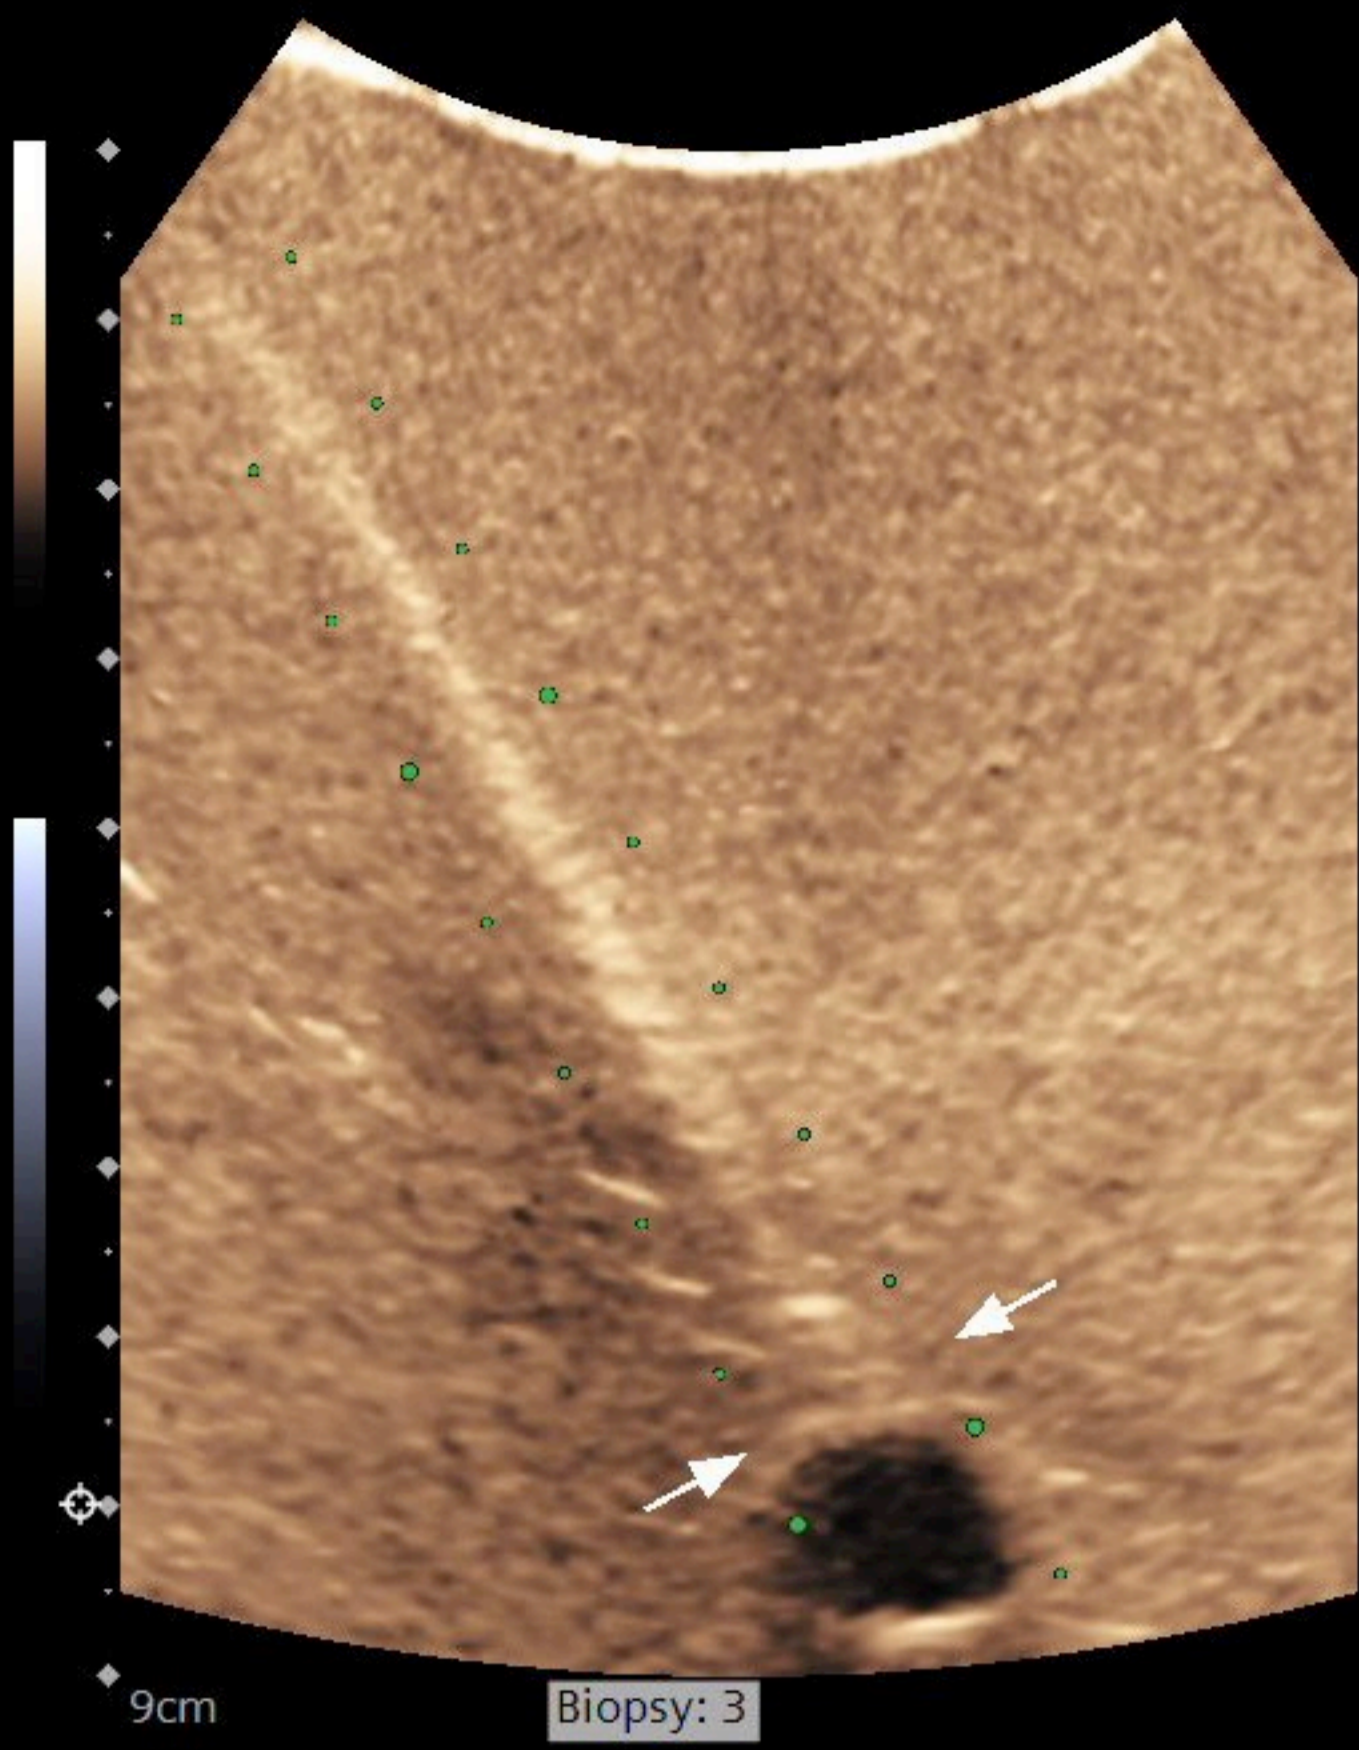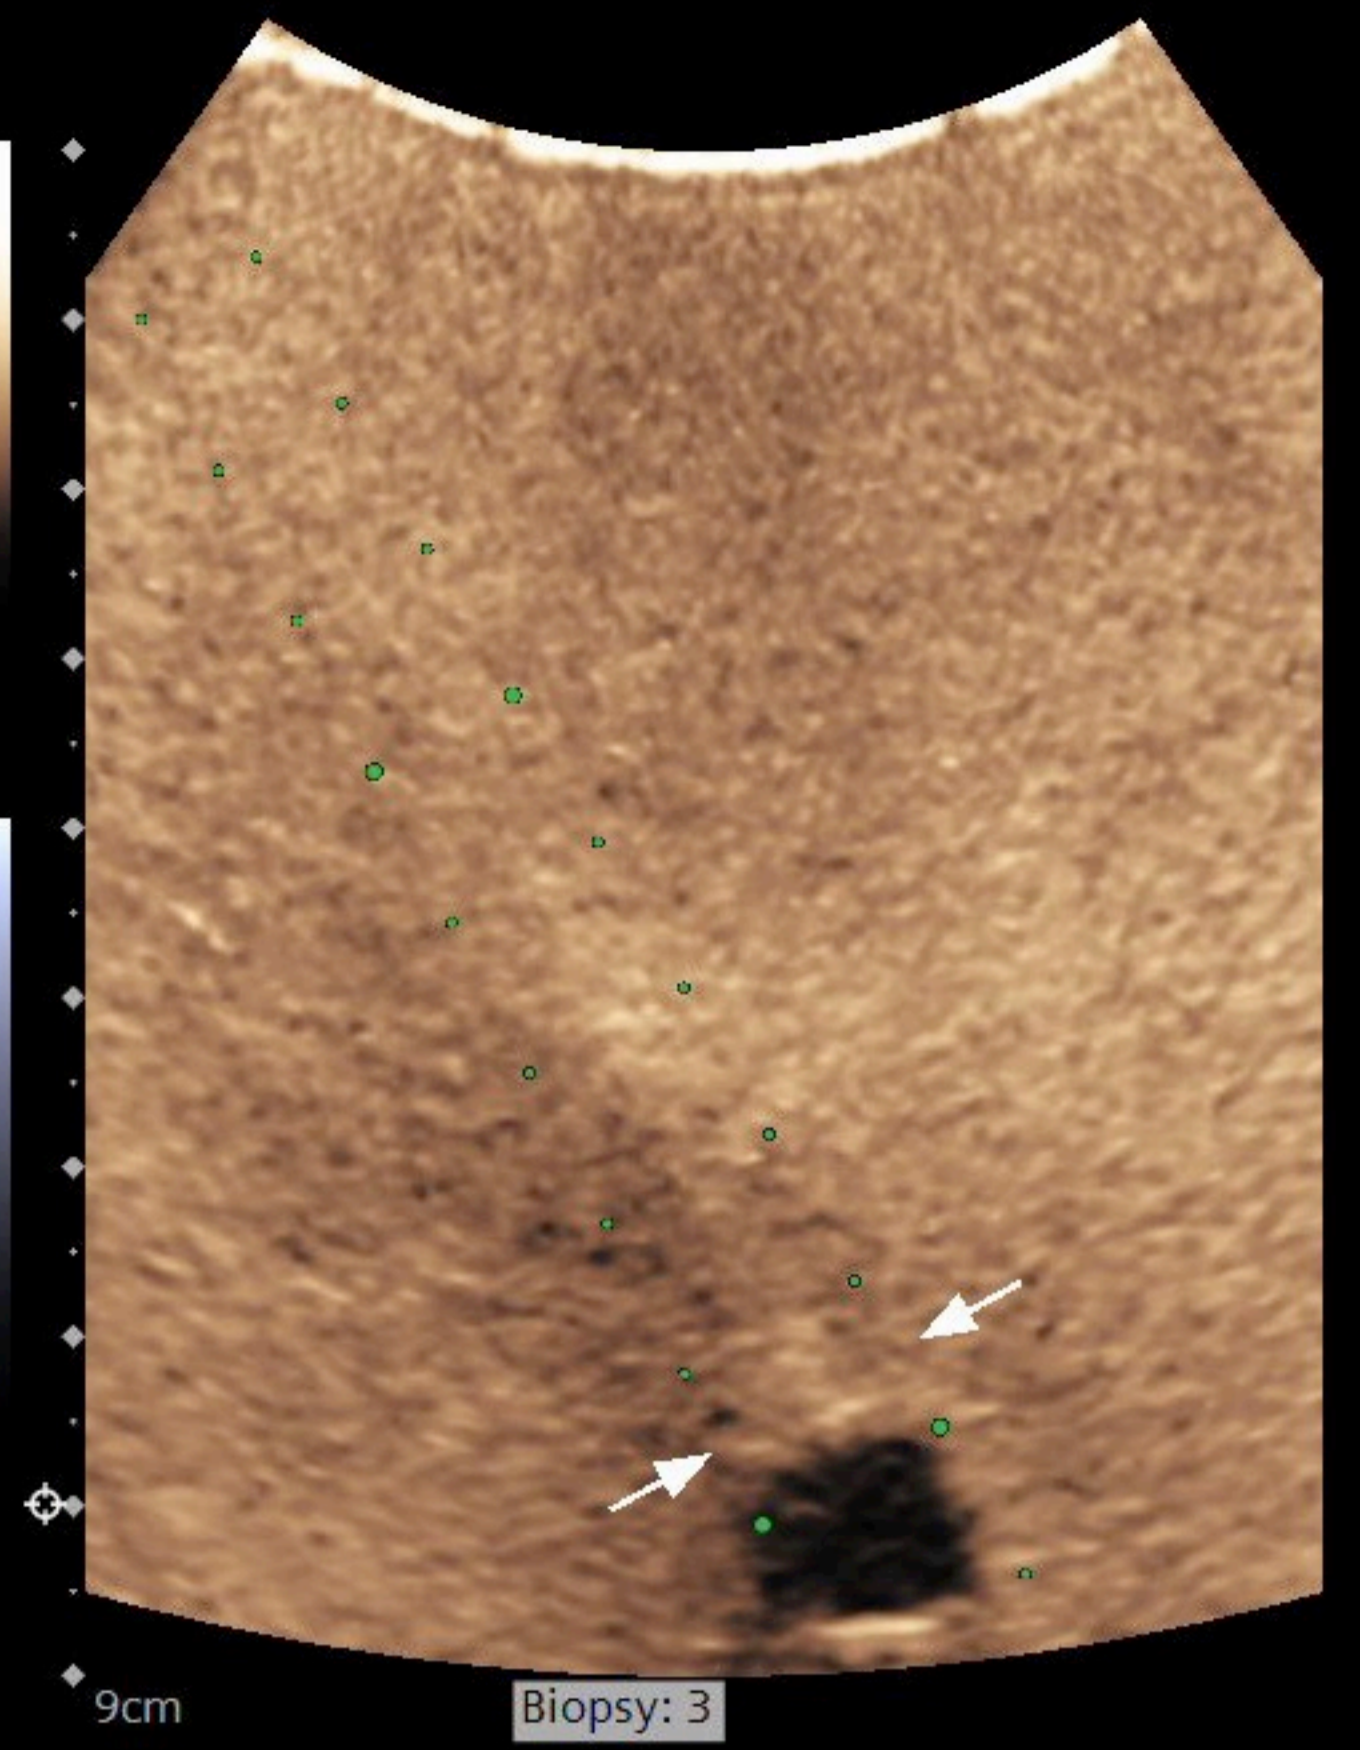

1st puncture

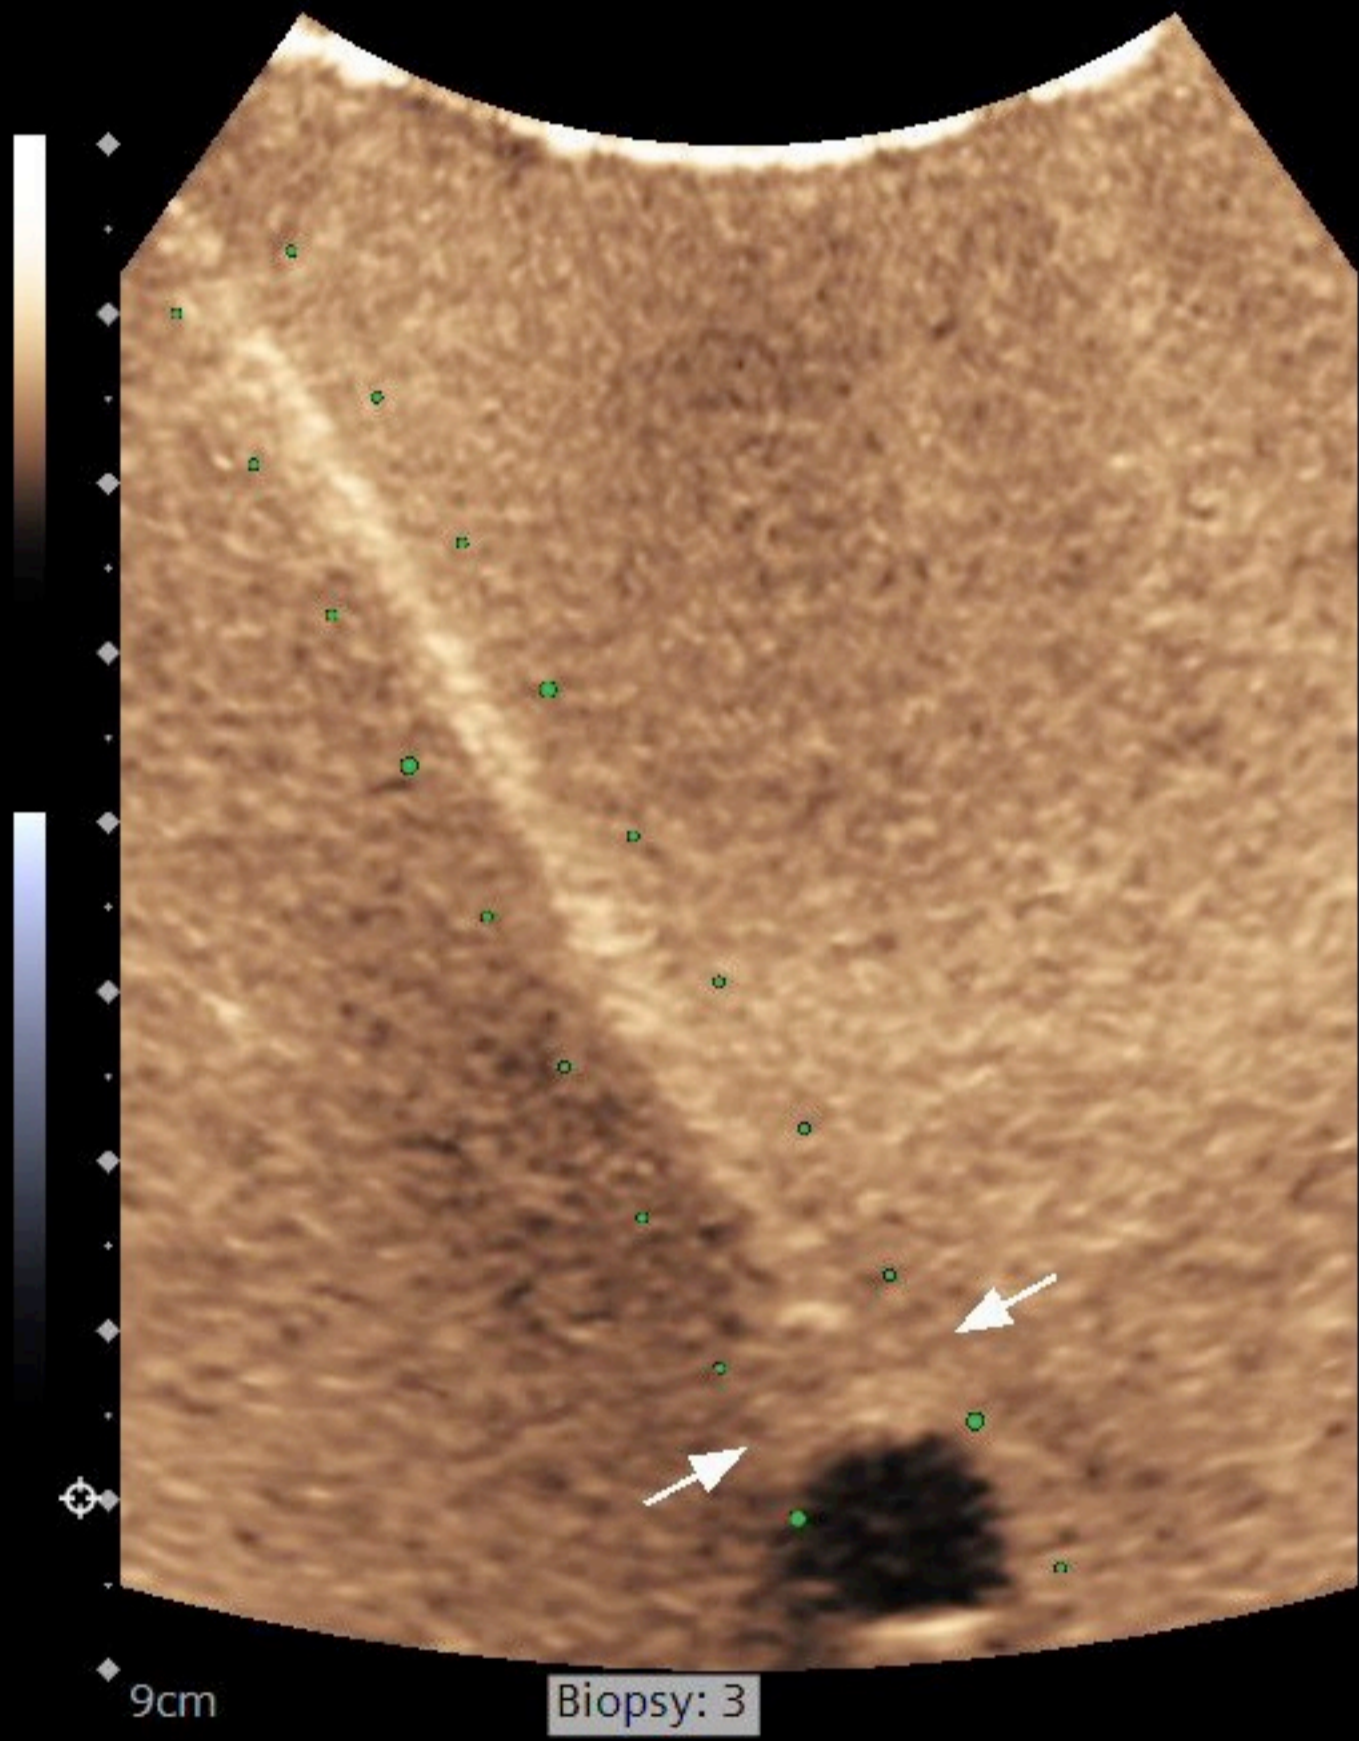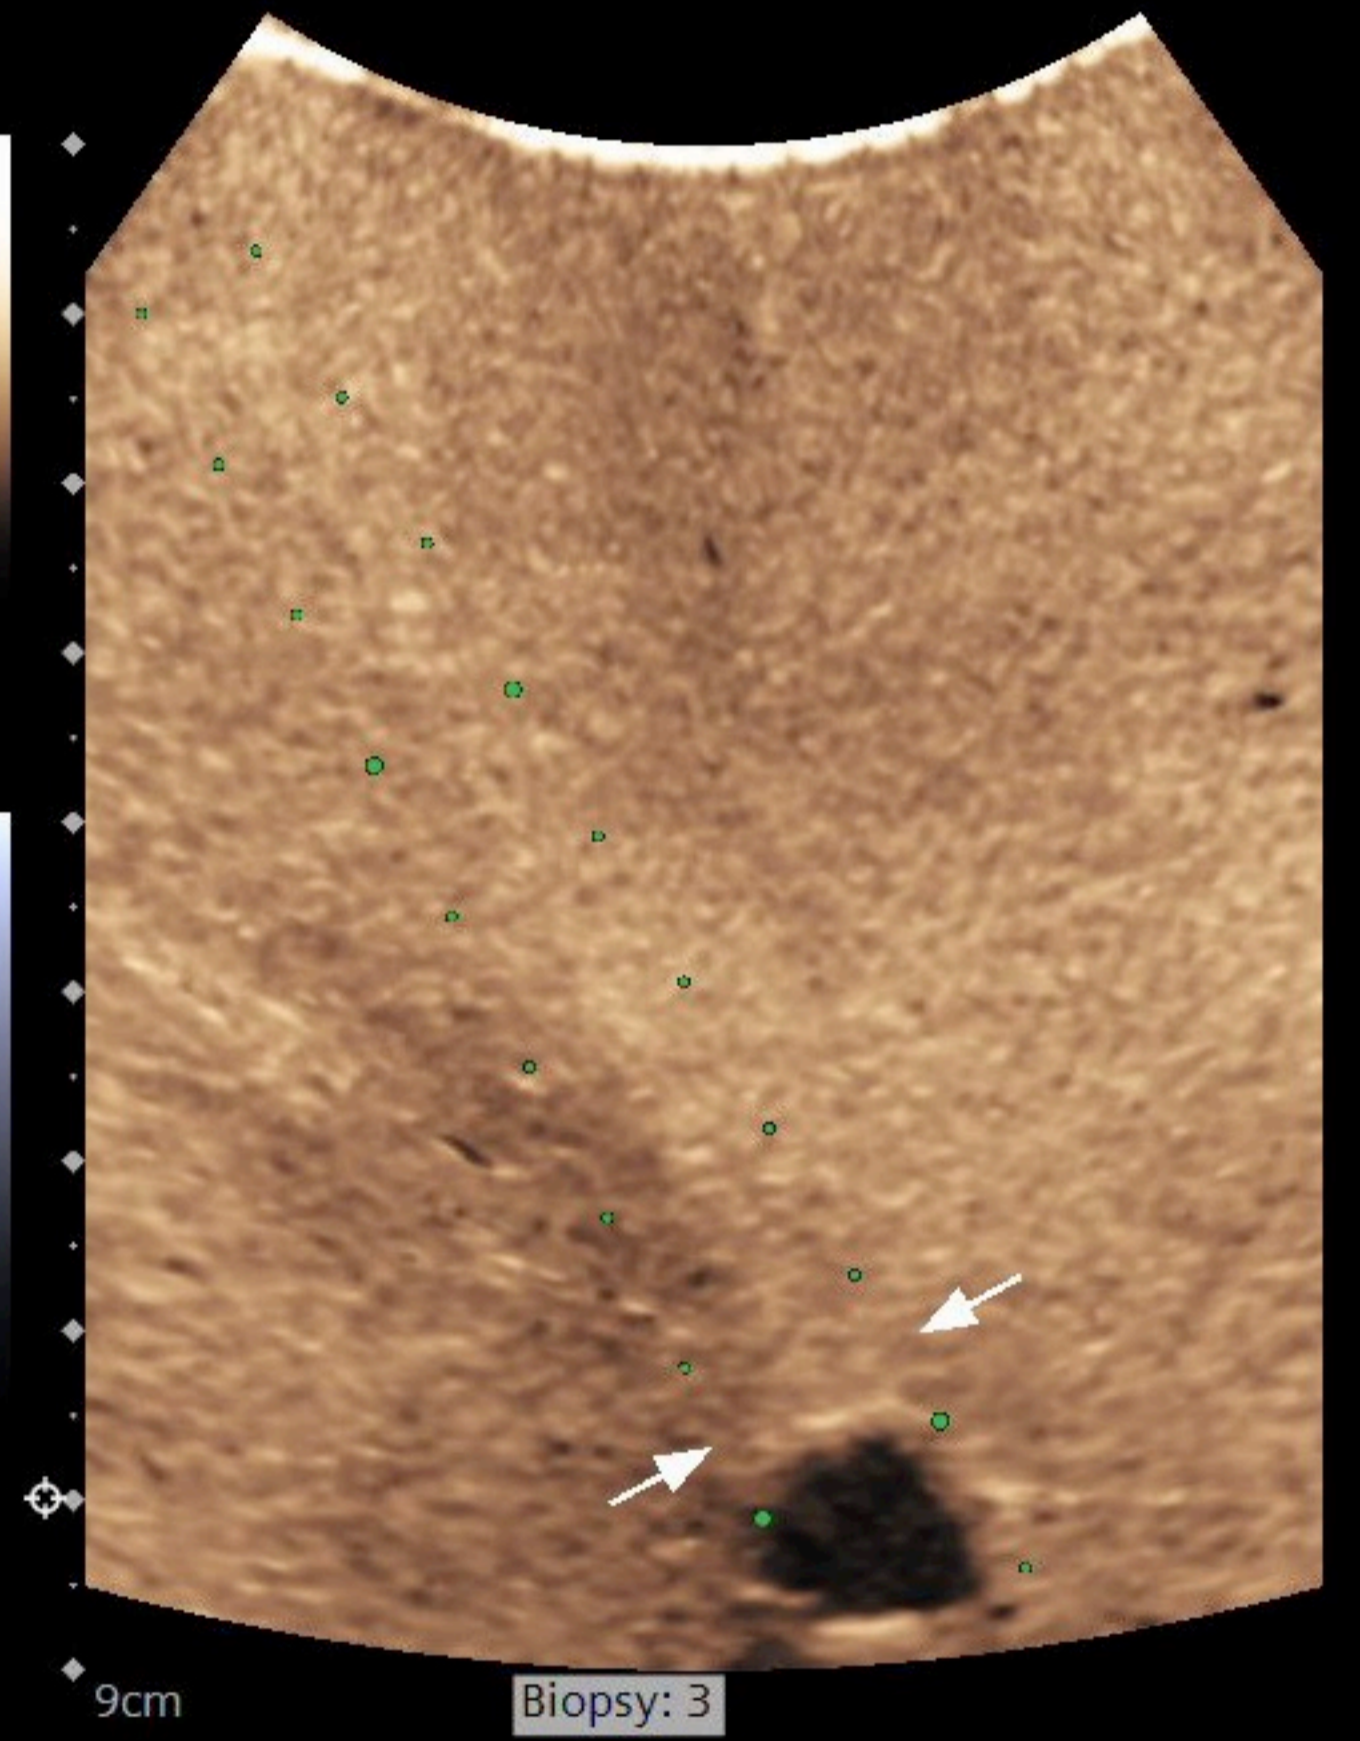

2nd puncture

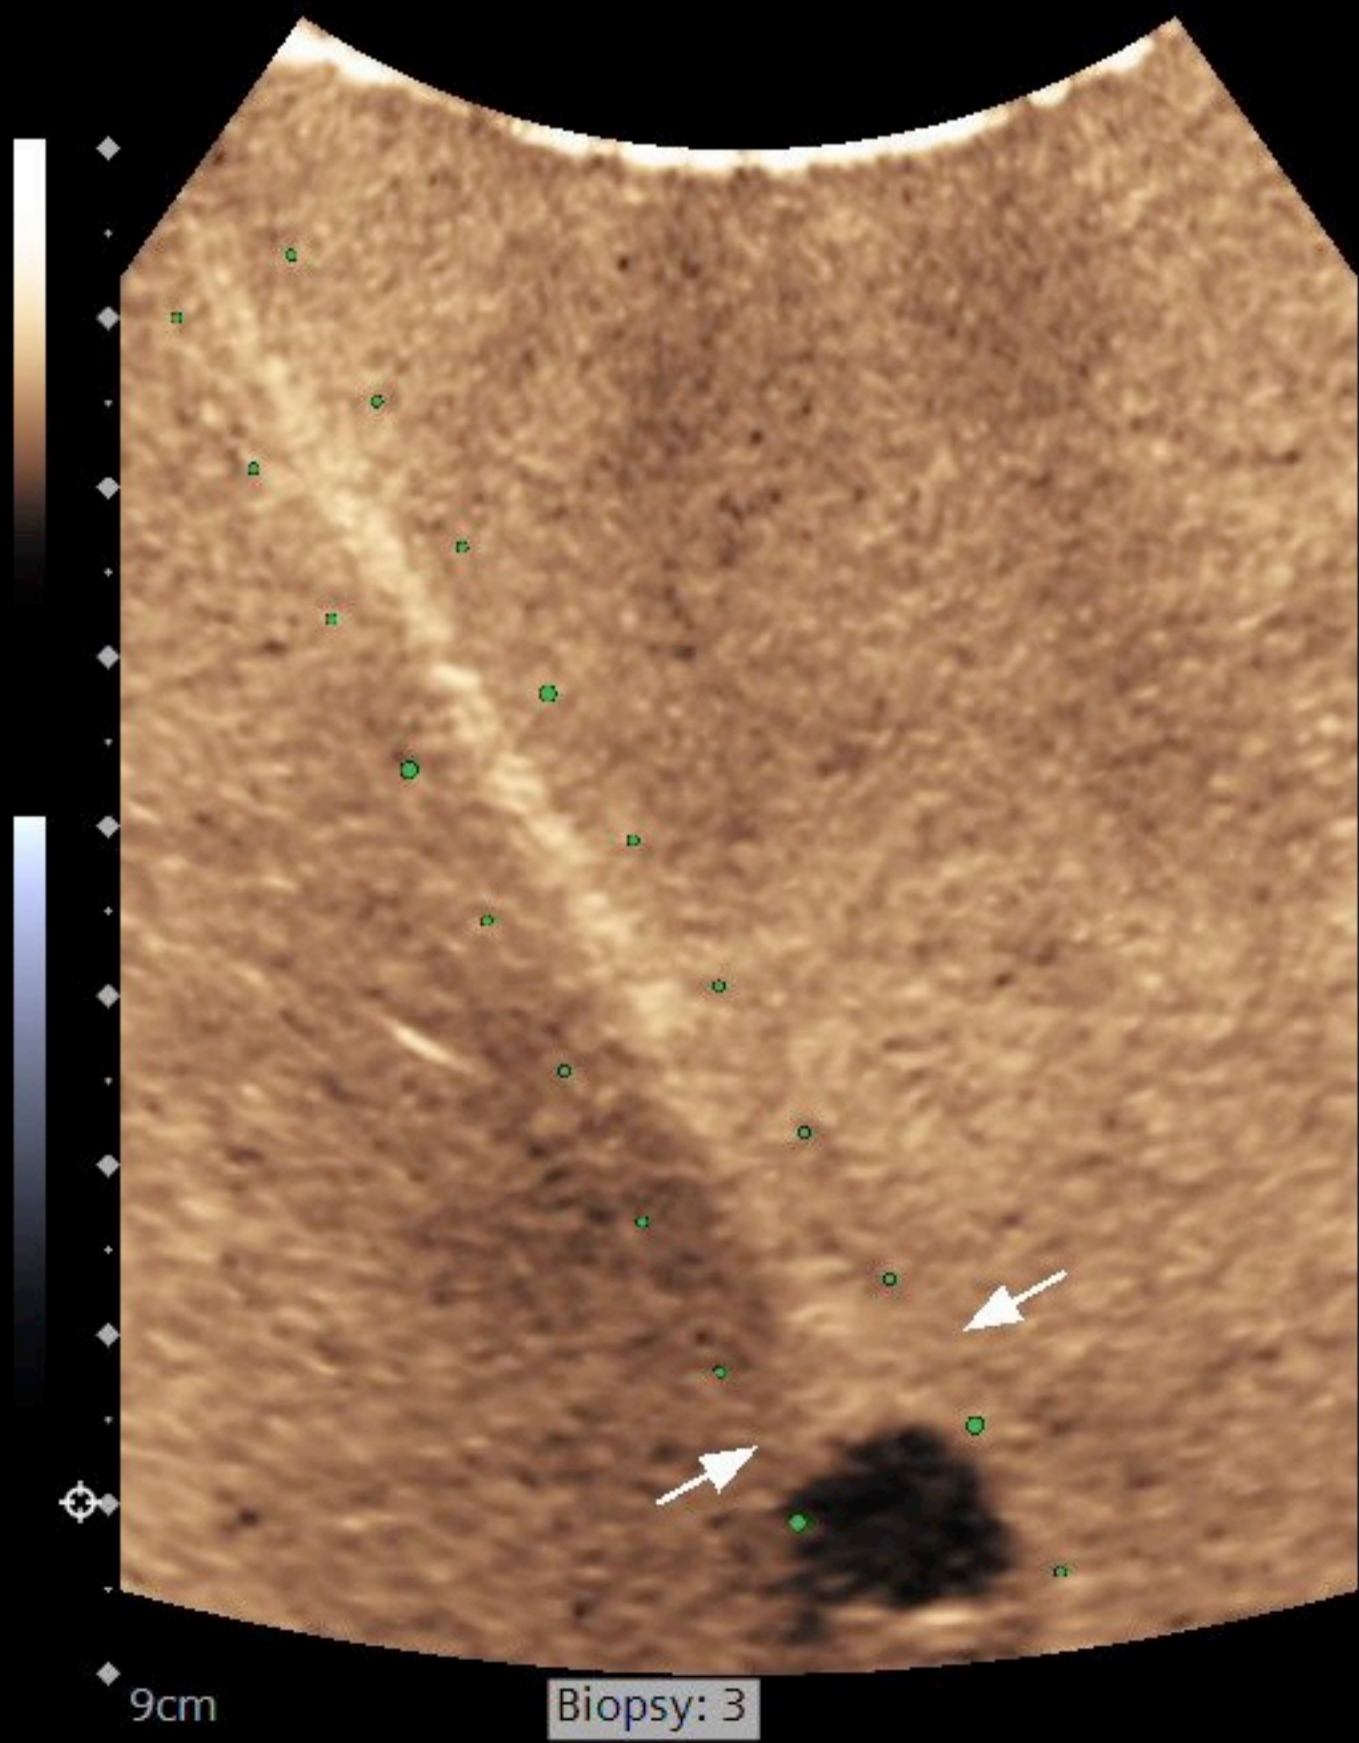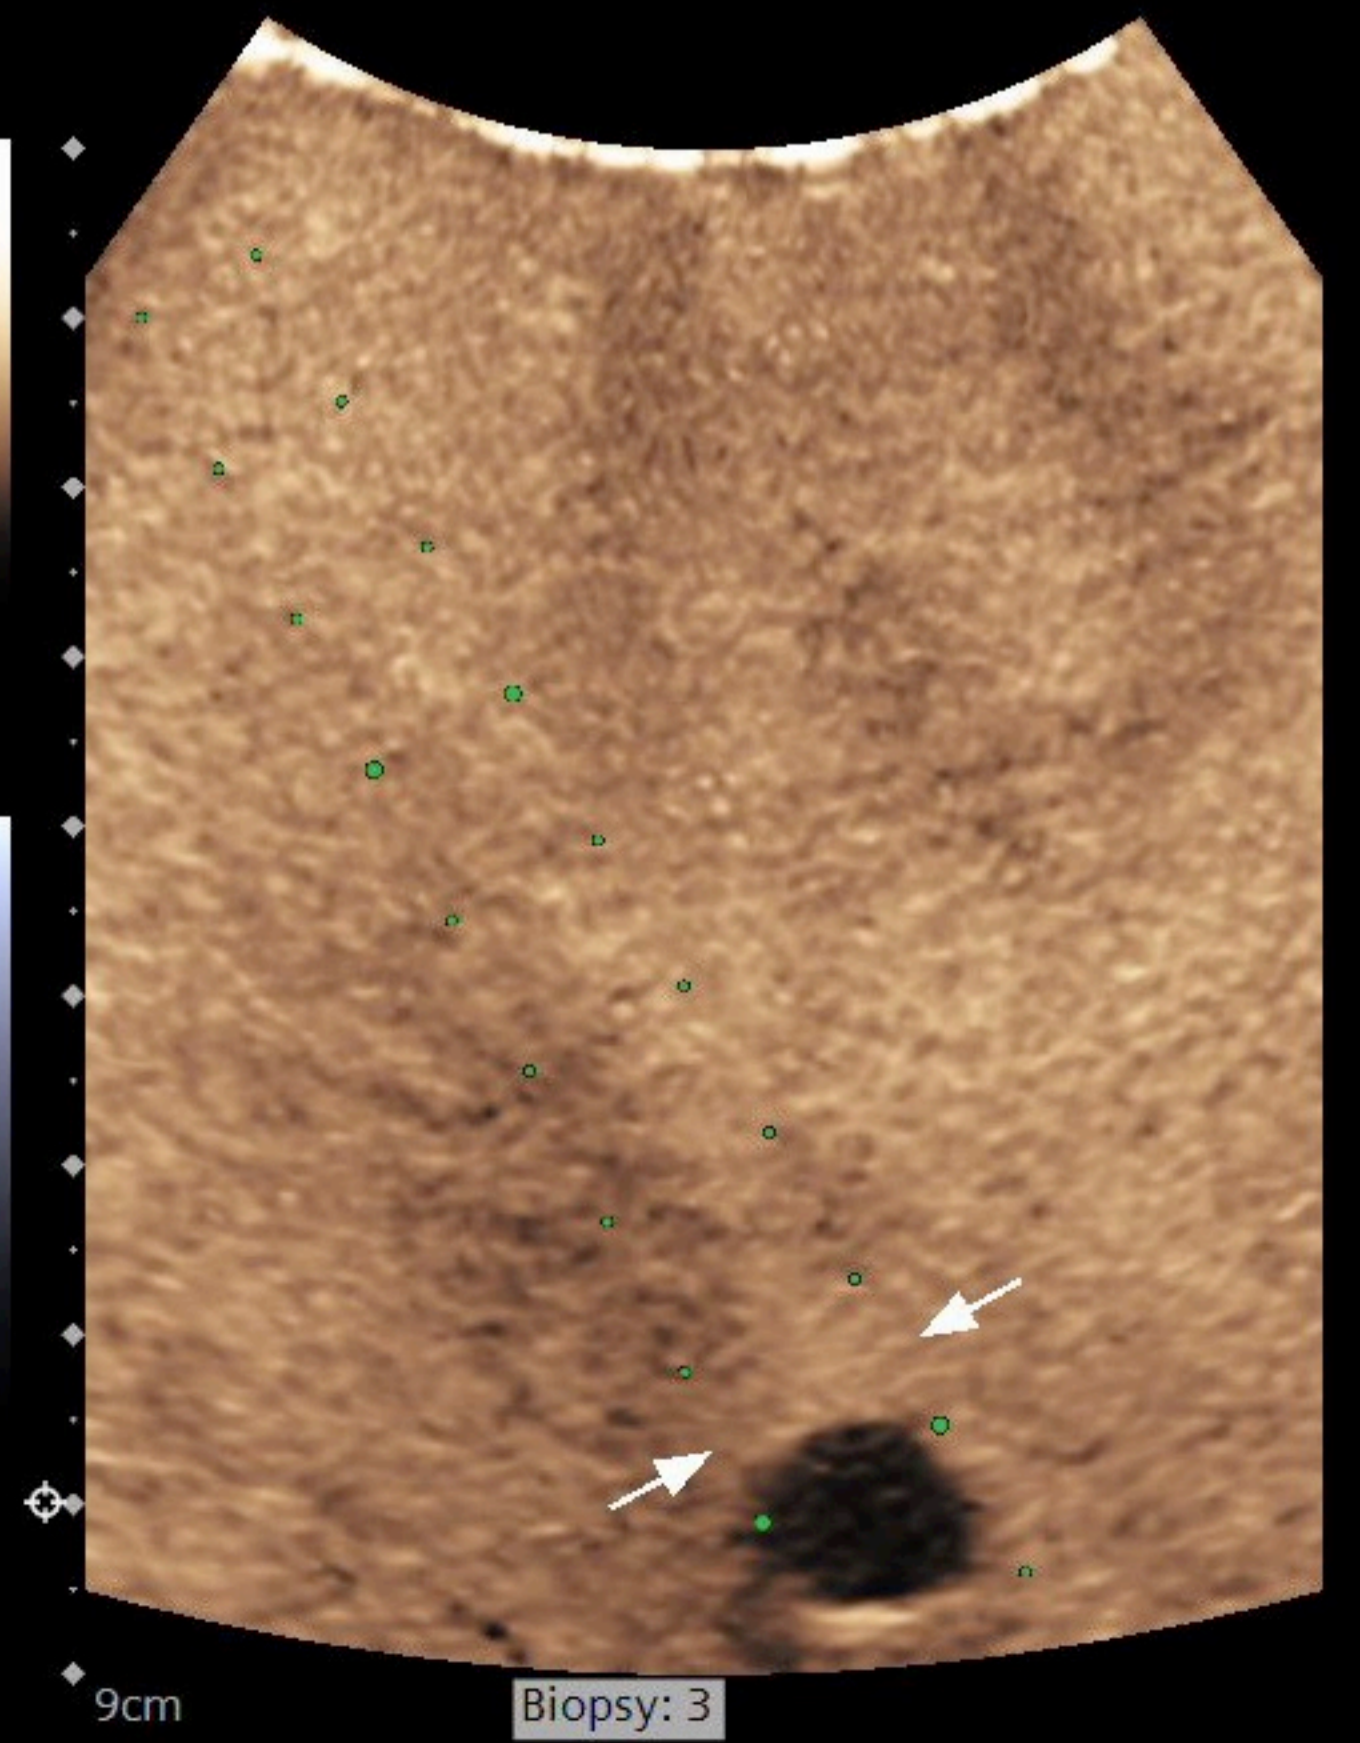

3rd puncture

Ultrasound contrast agent

Control



Side-notch biopsy needle (set 7/10)

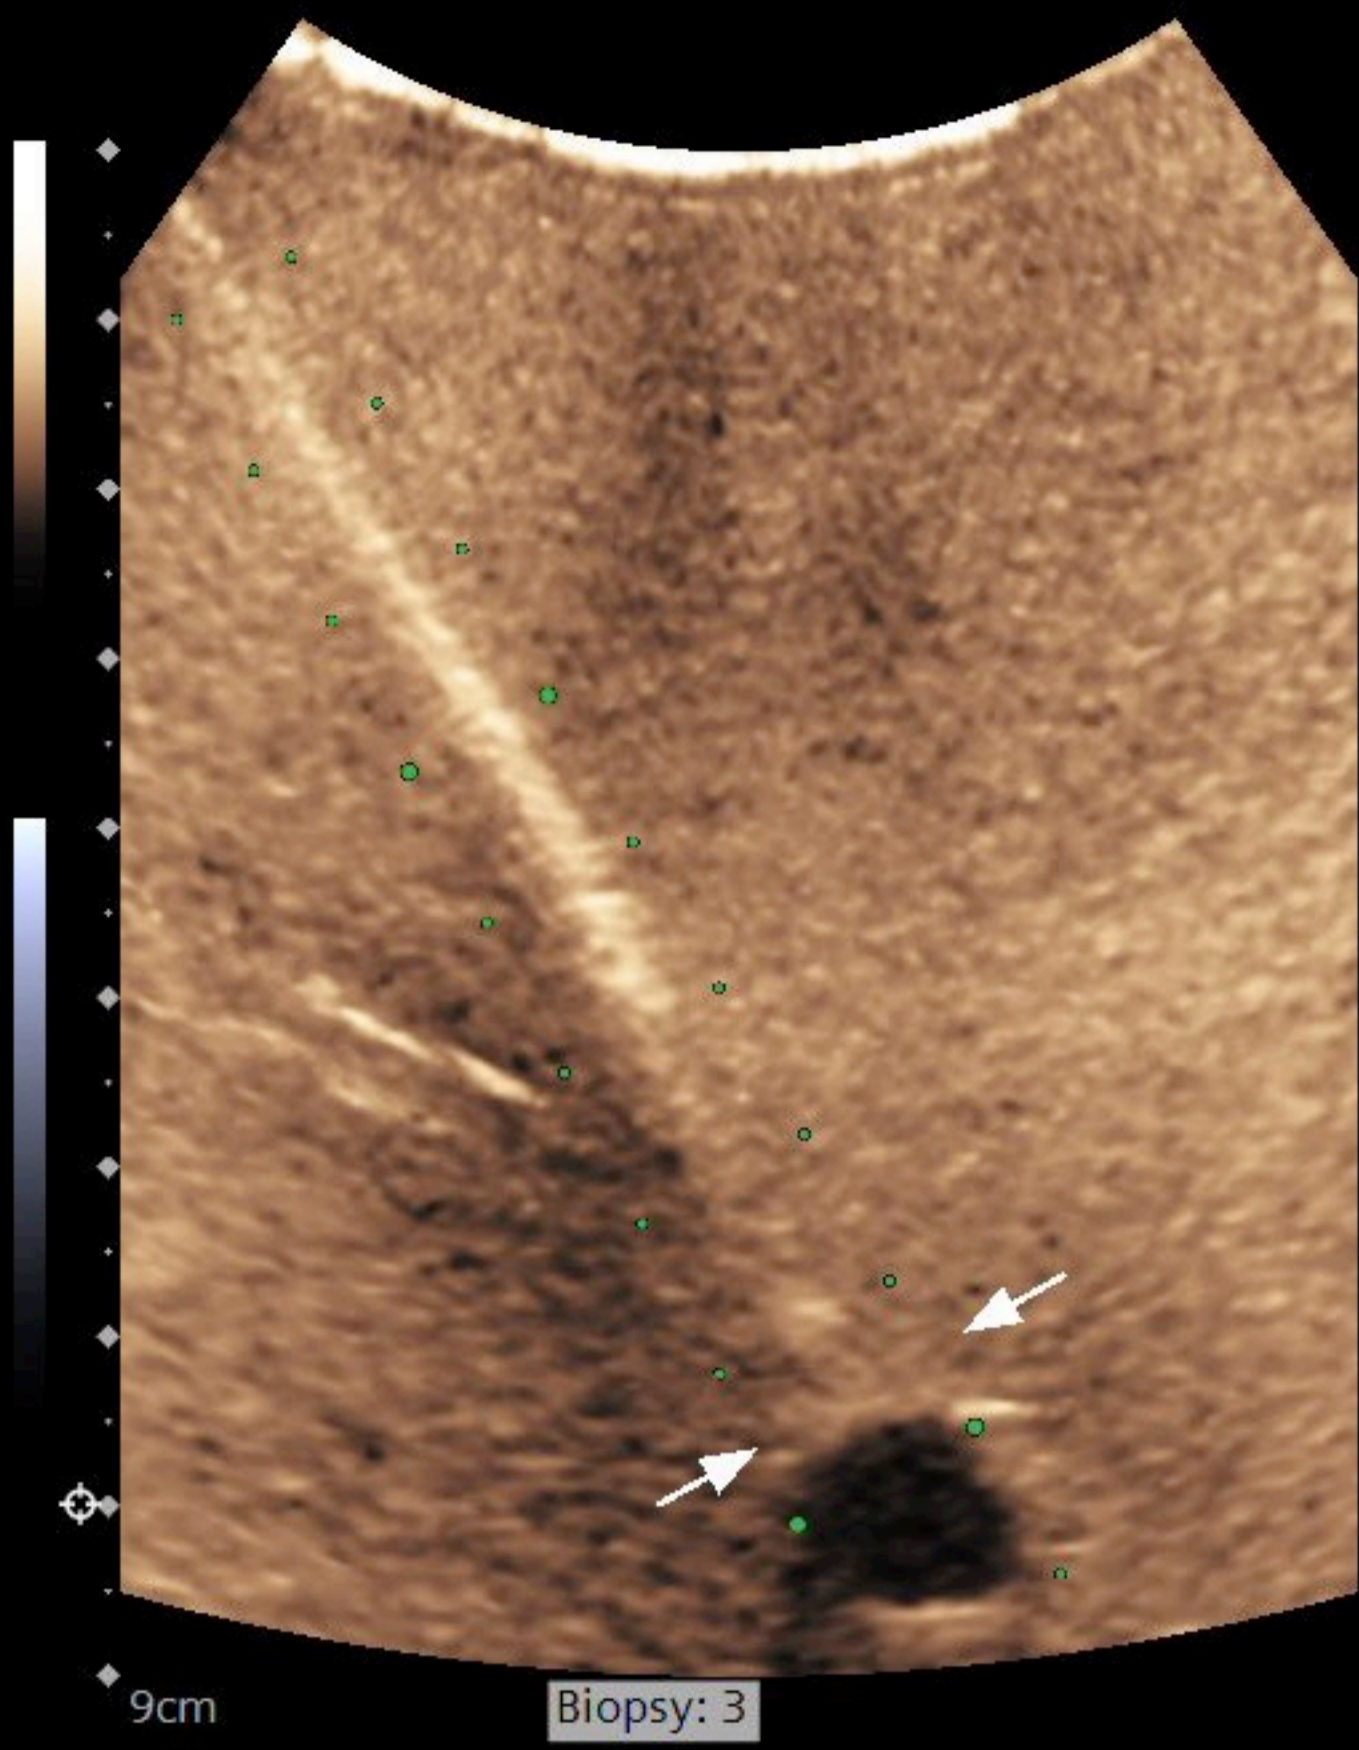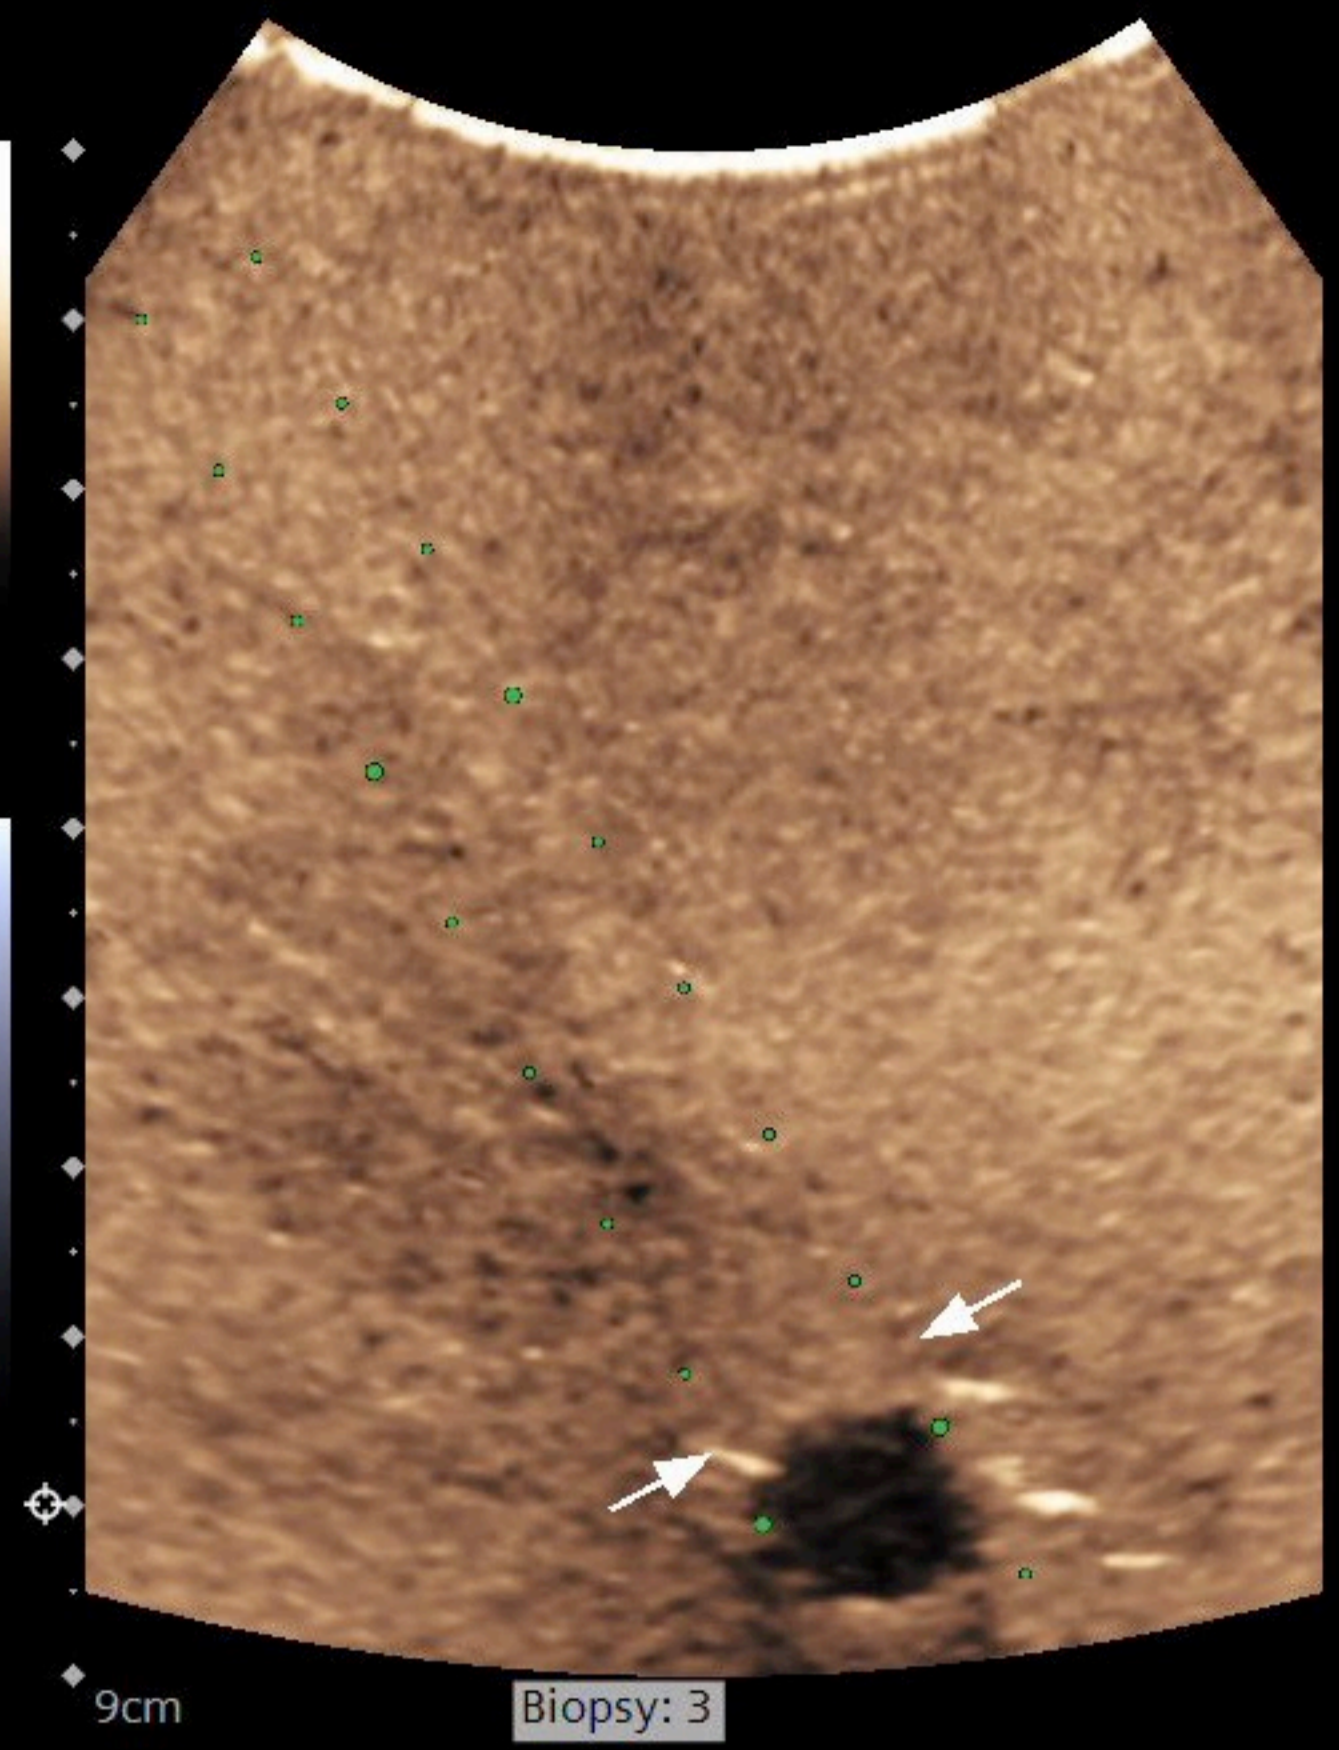

1st puncture

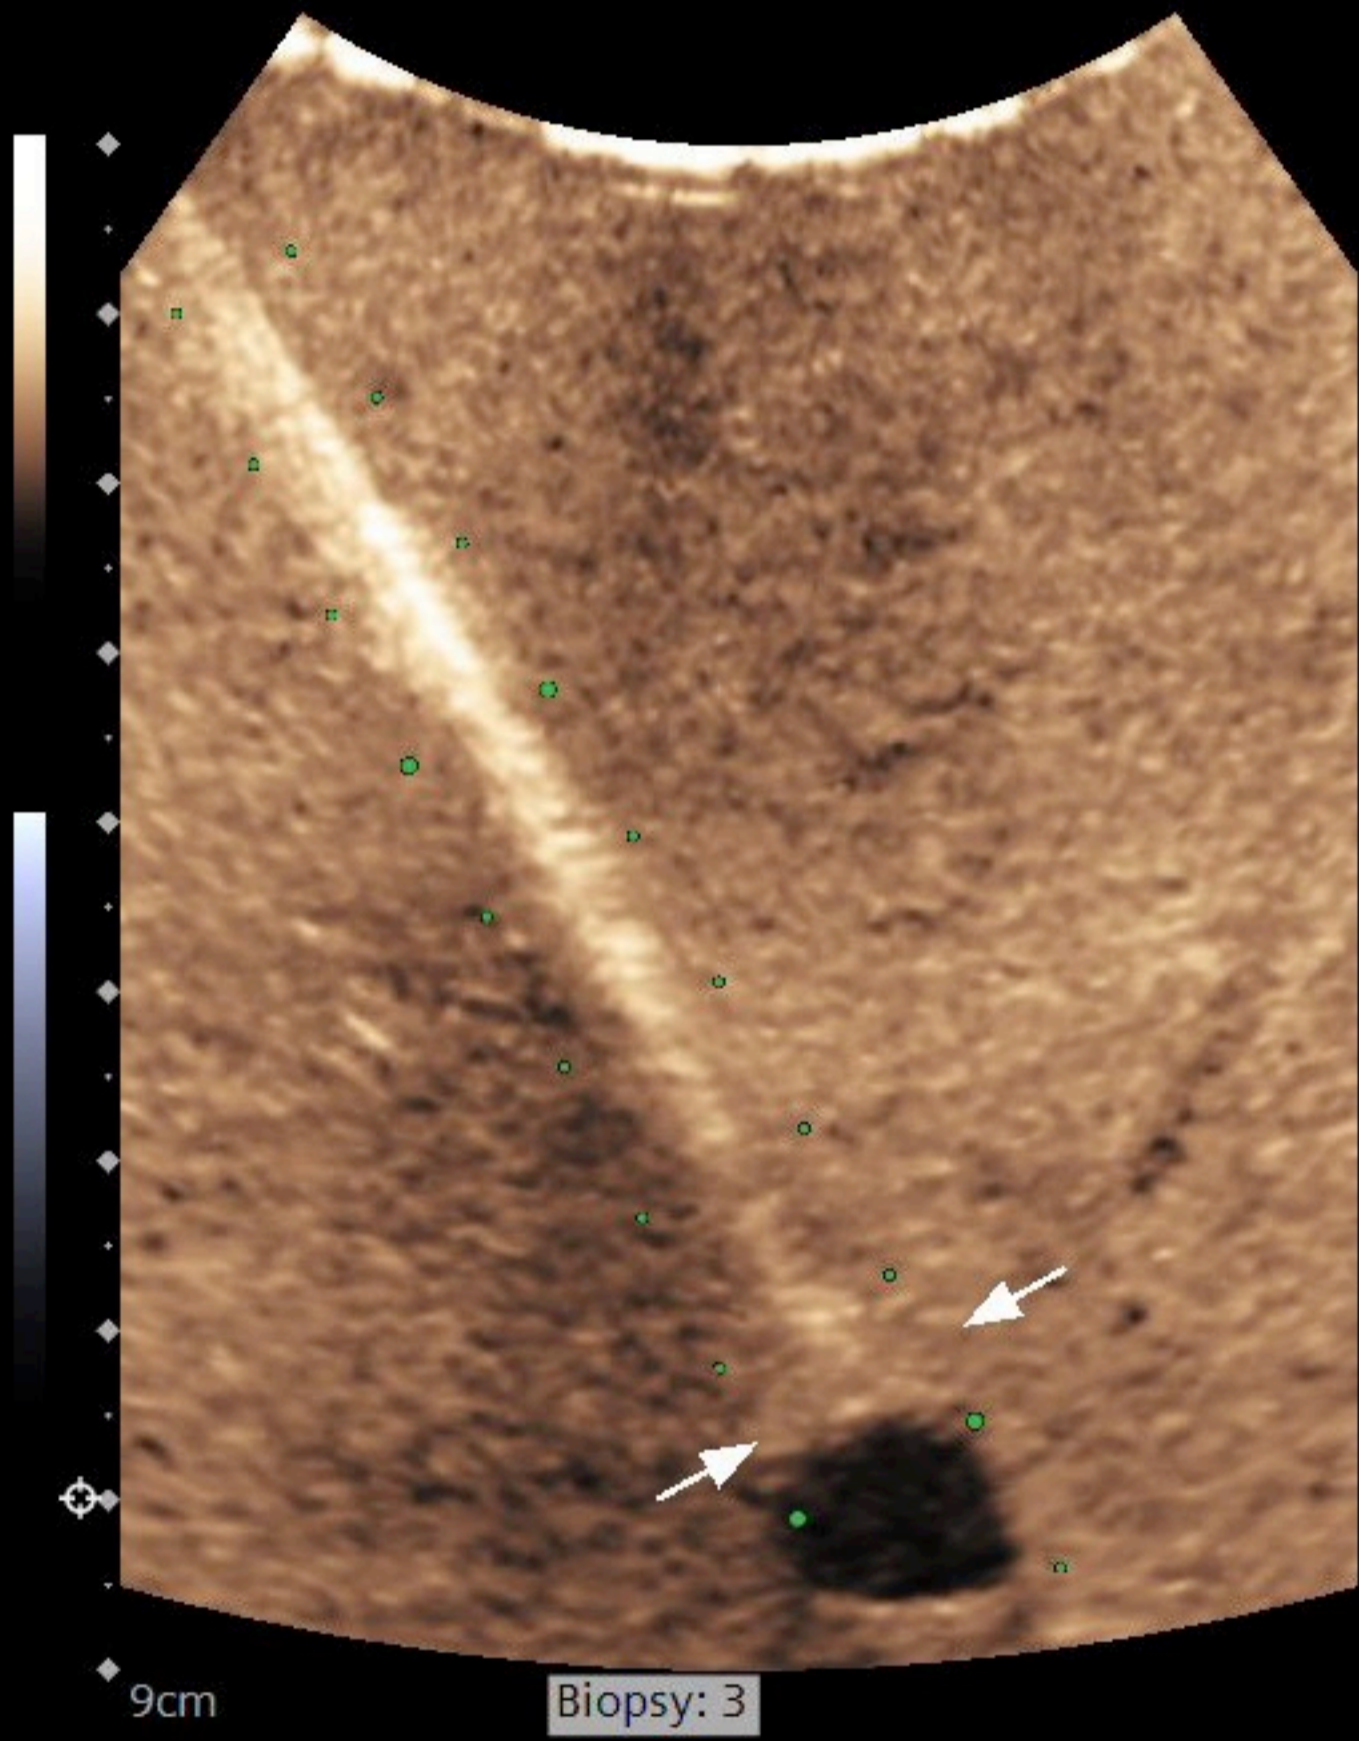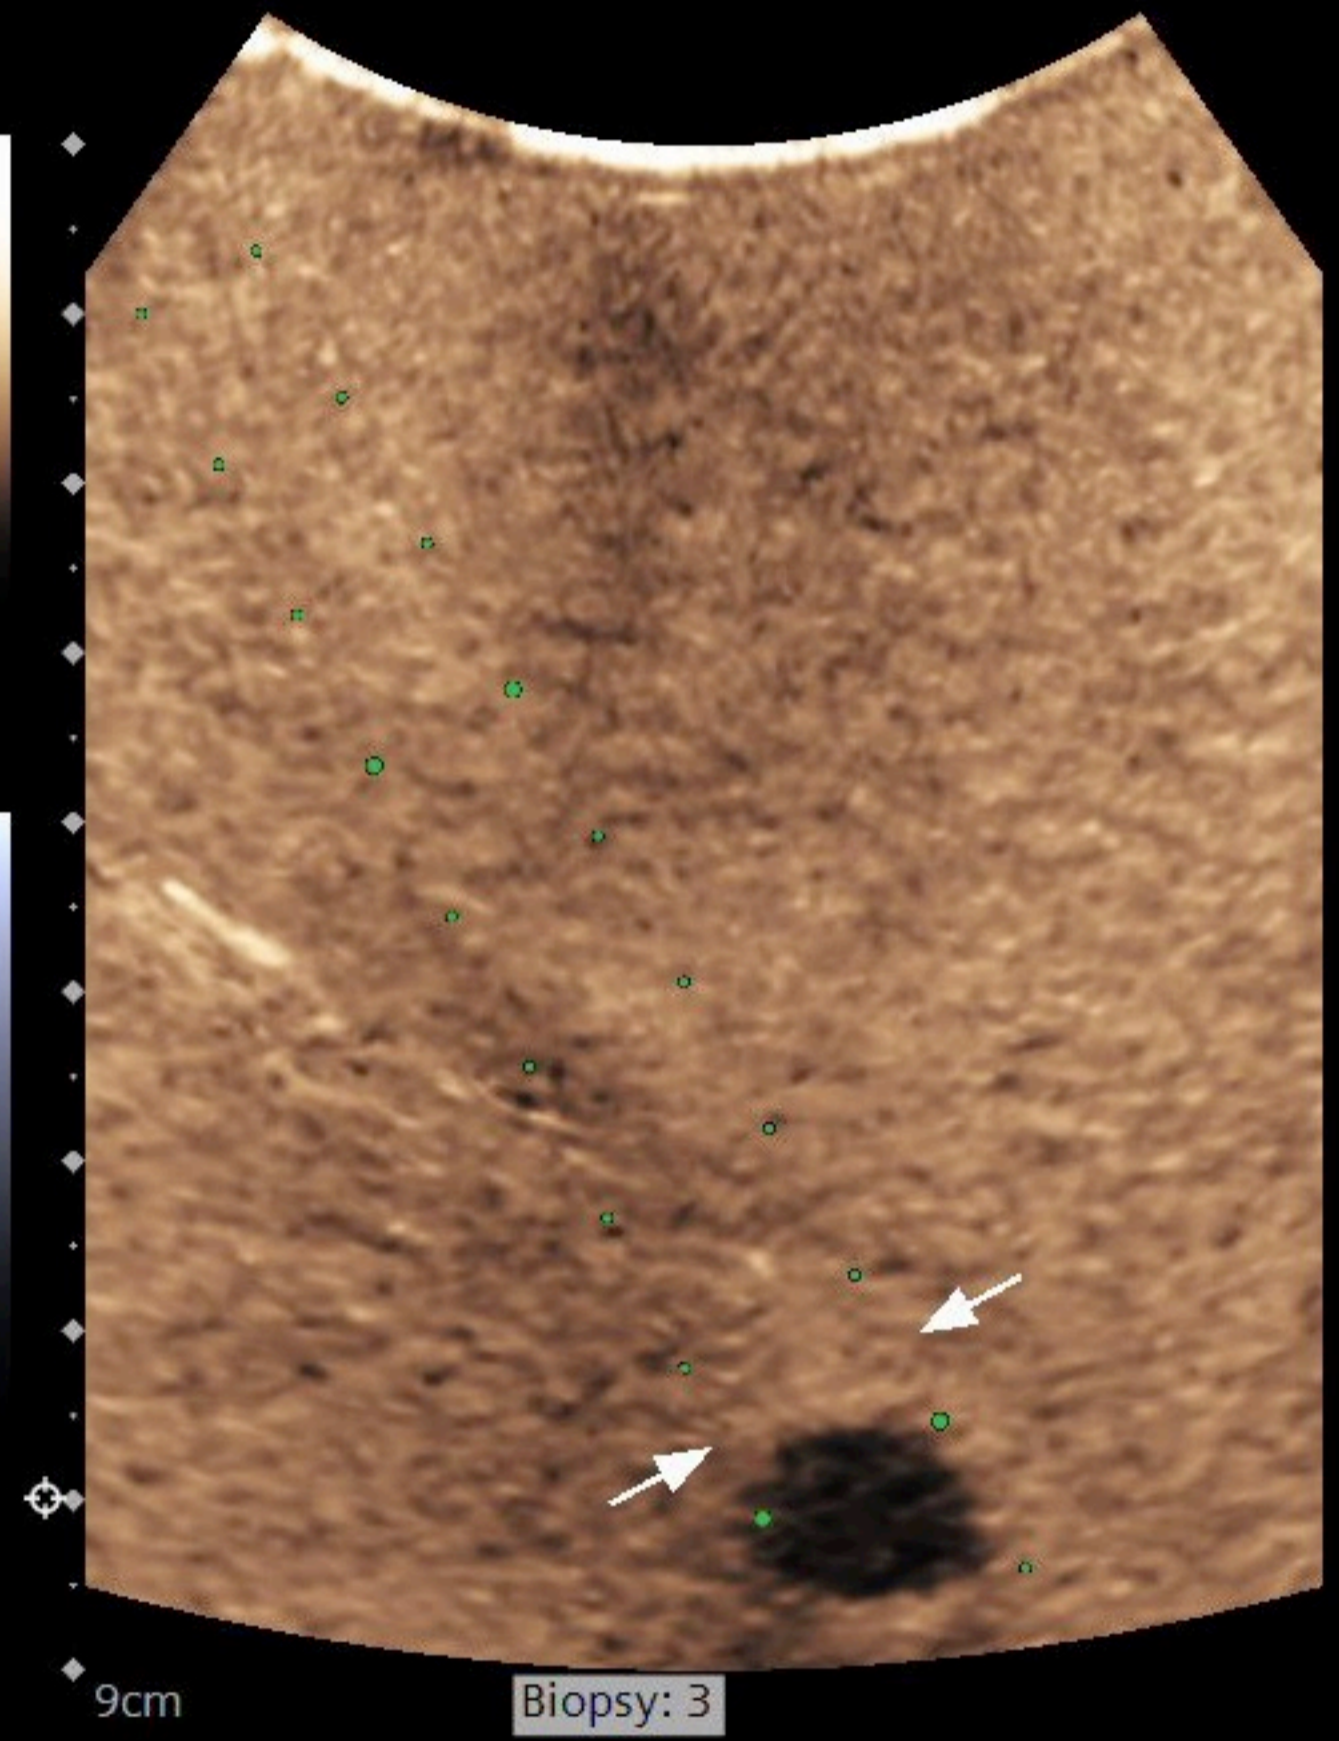

2nd puncture

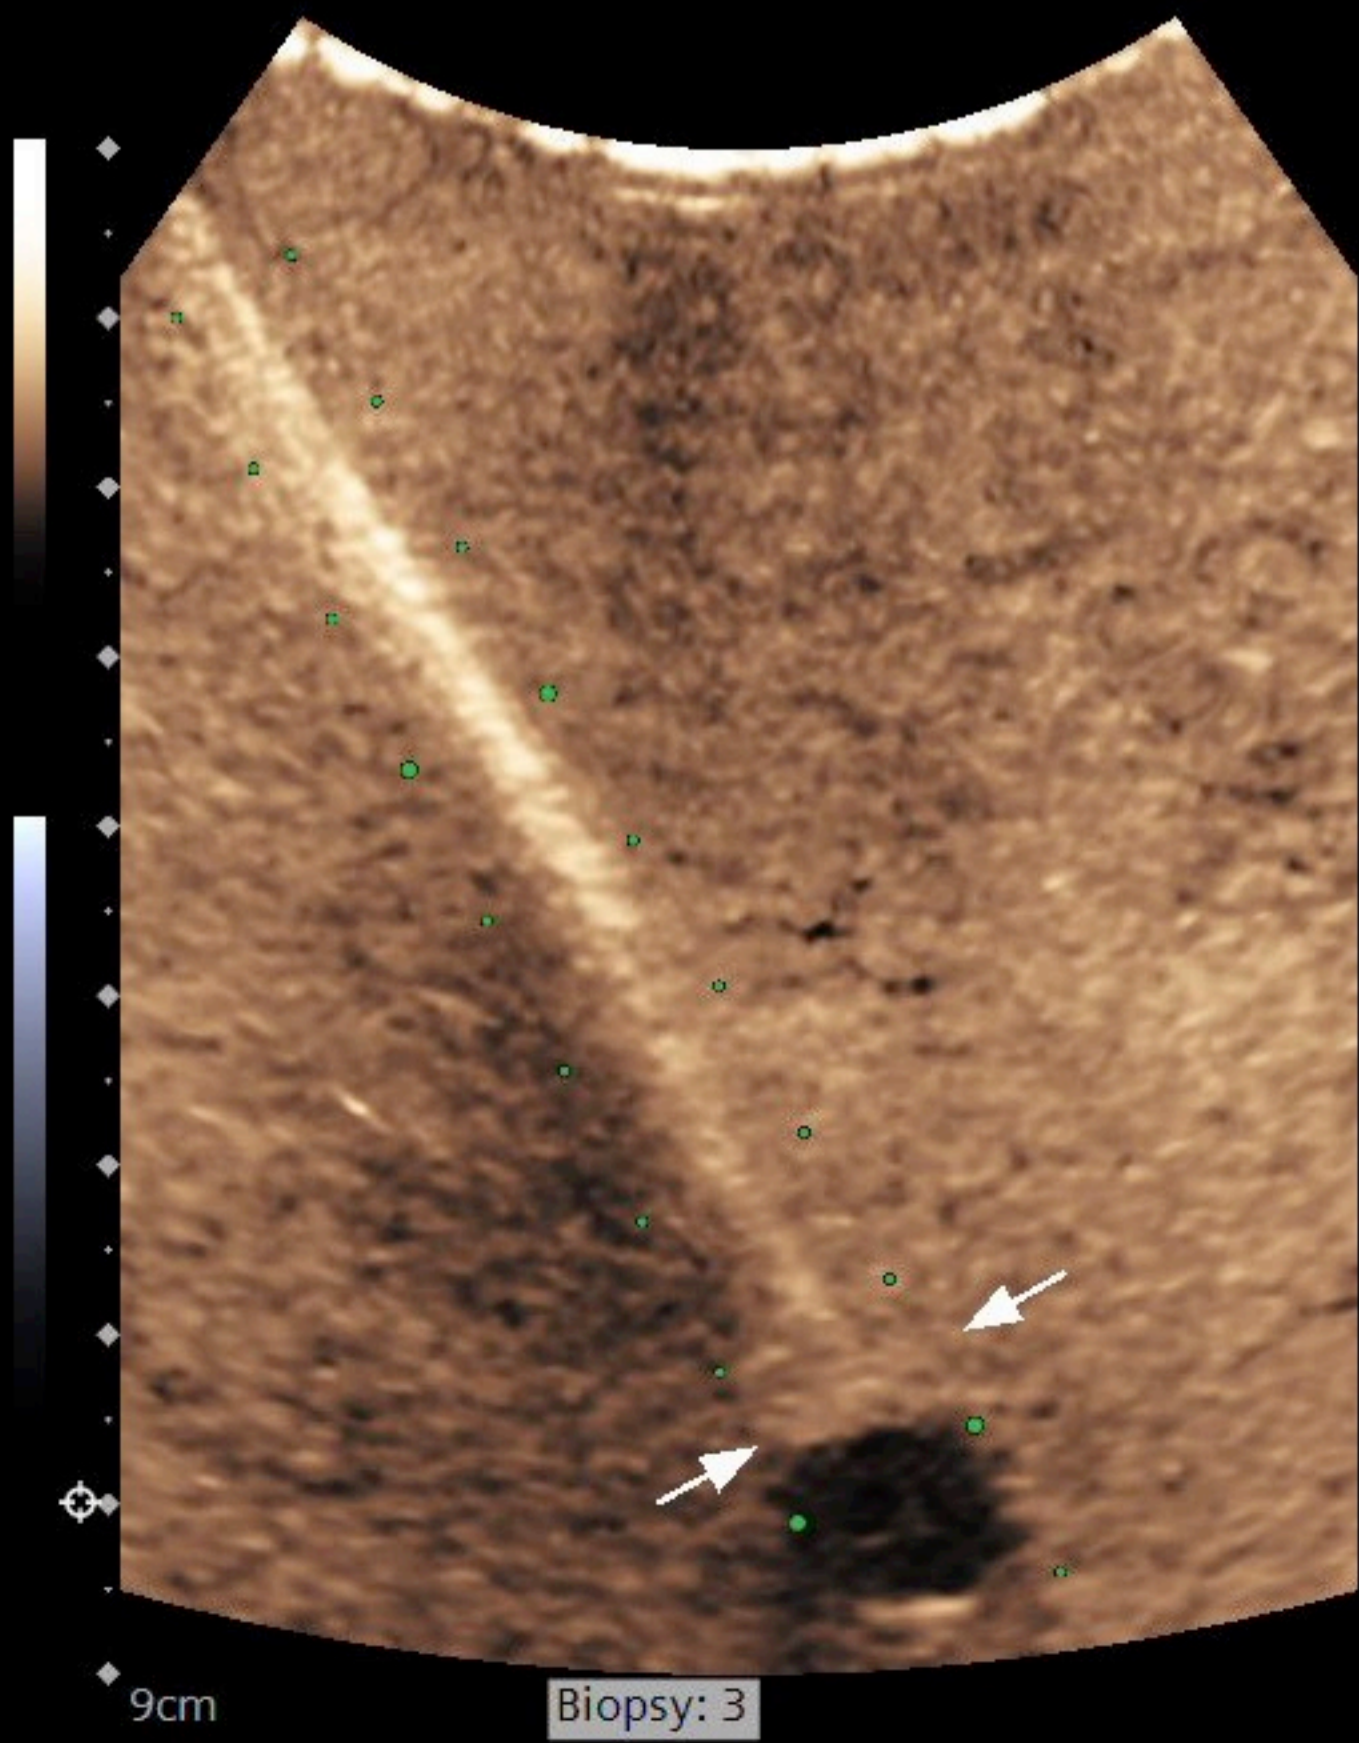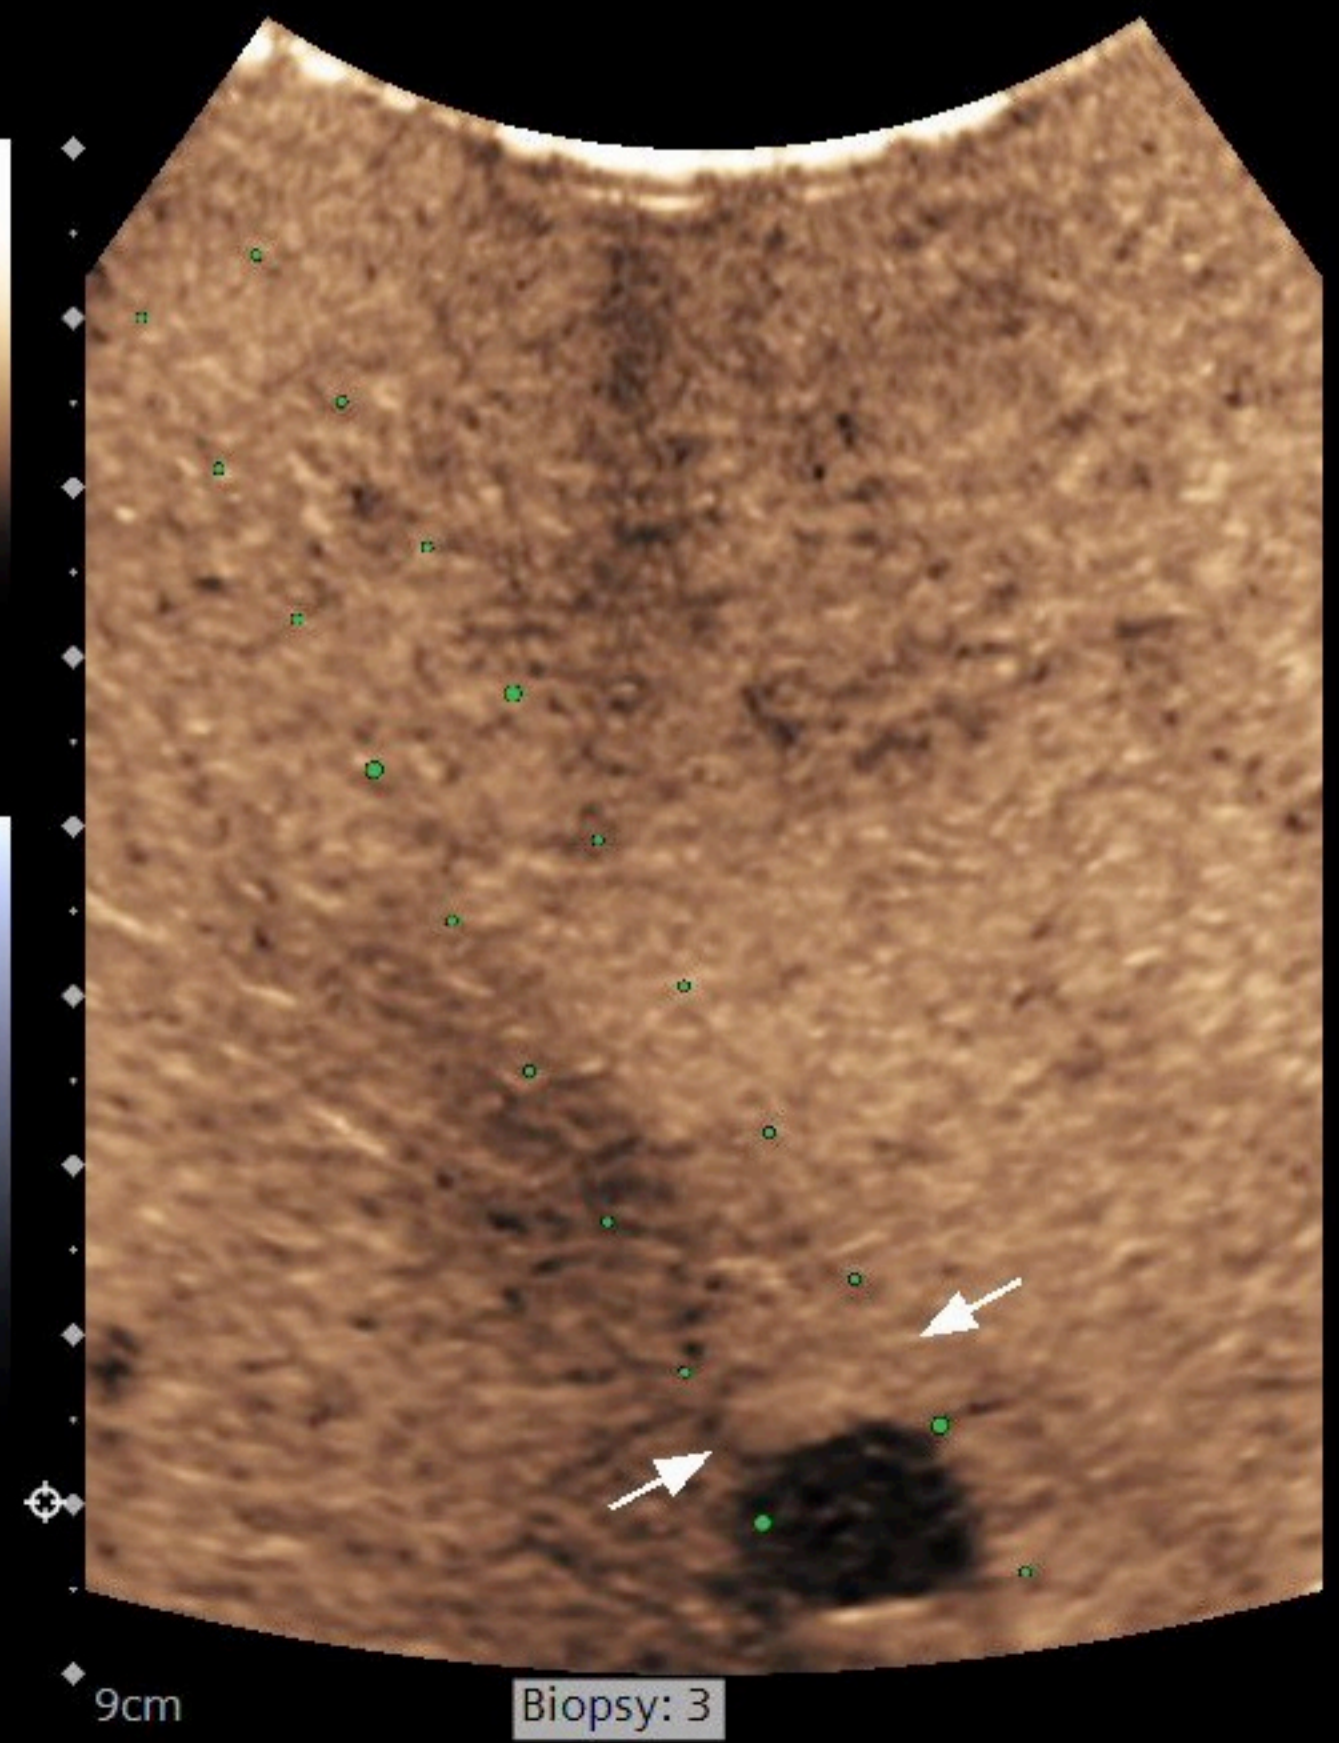

3rd puncture

Ultrasound contrast agent

Control



Side-notch biopsy needle (set 8/10)

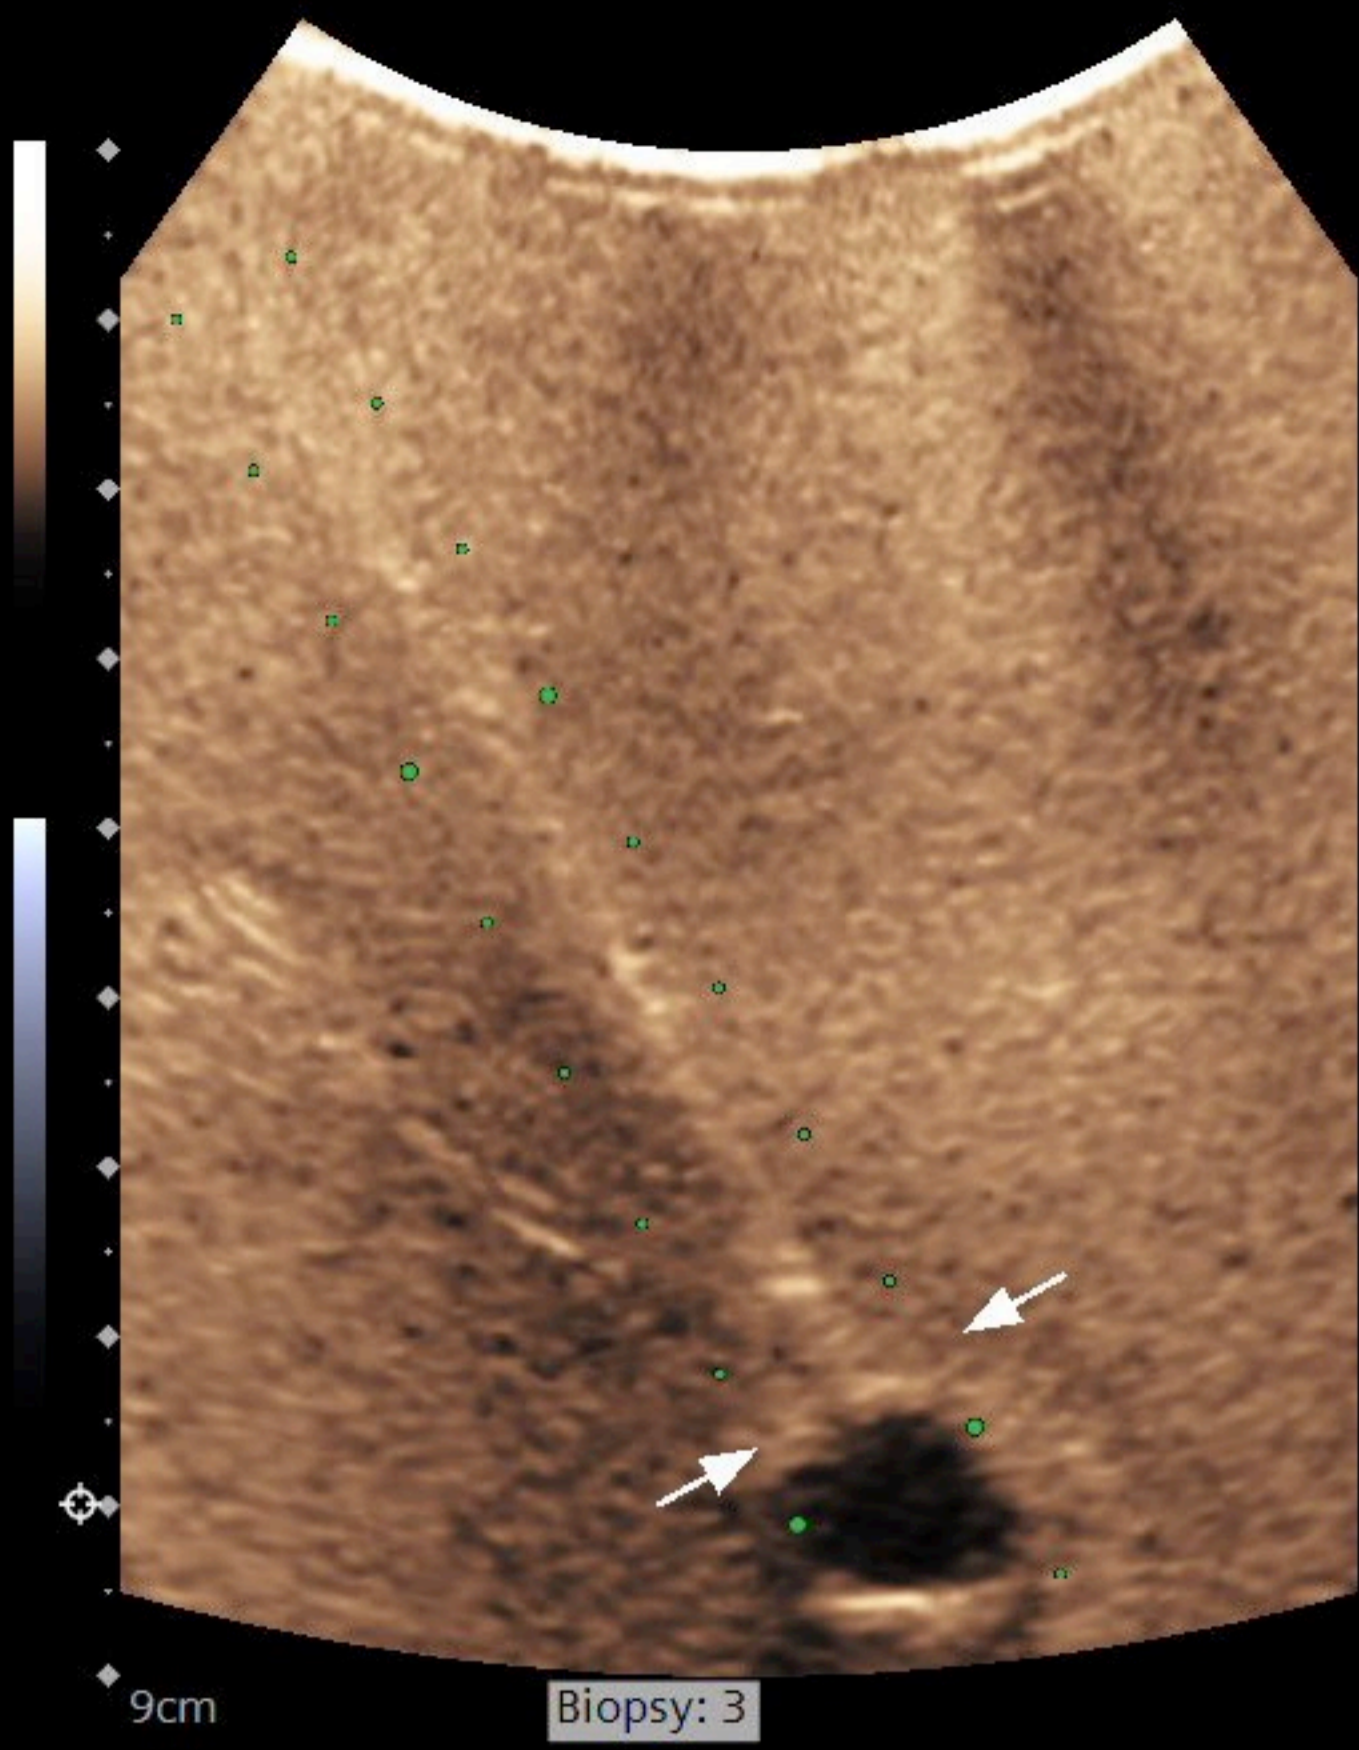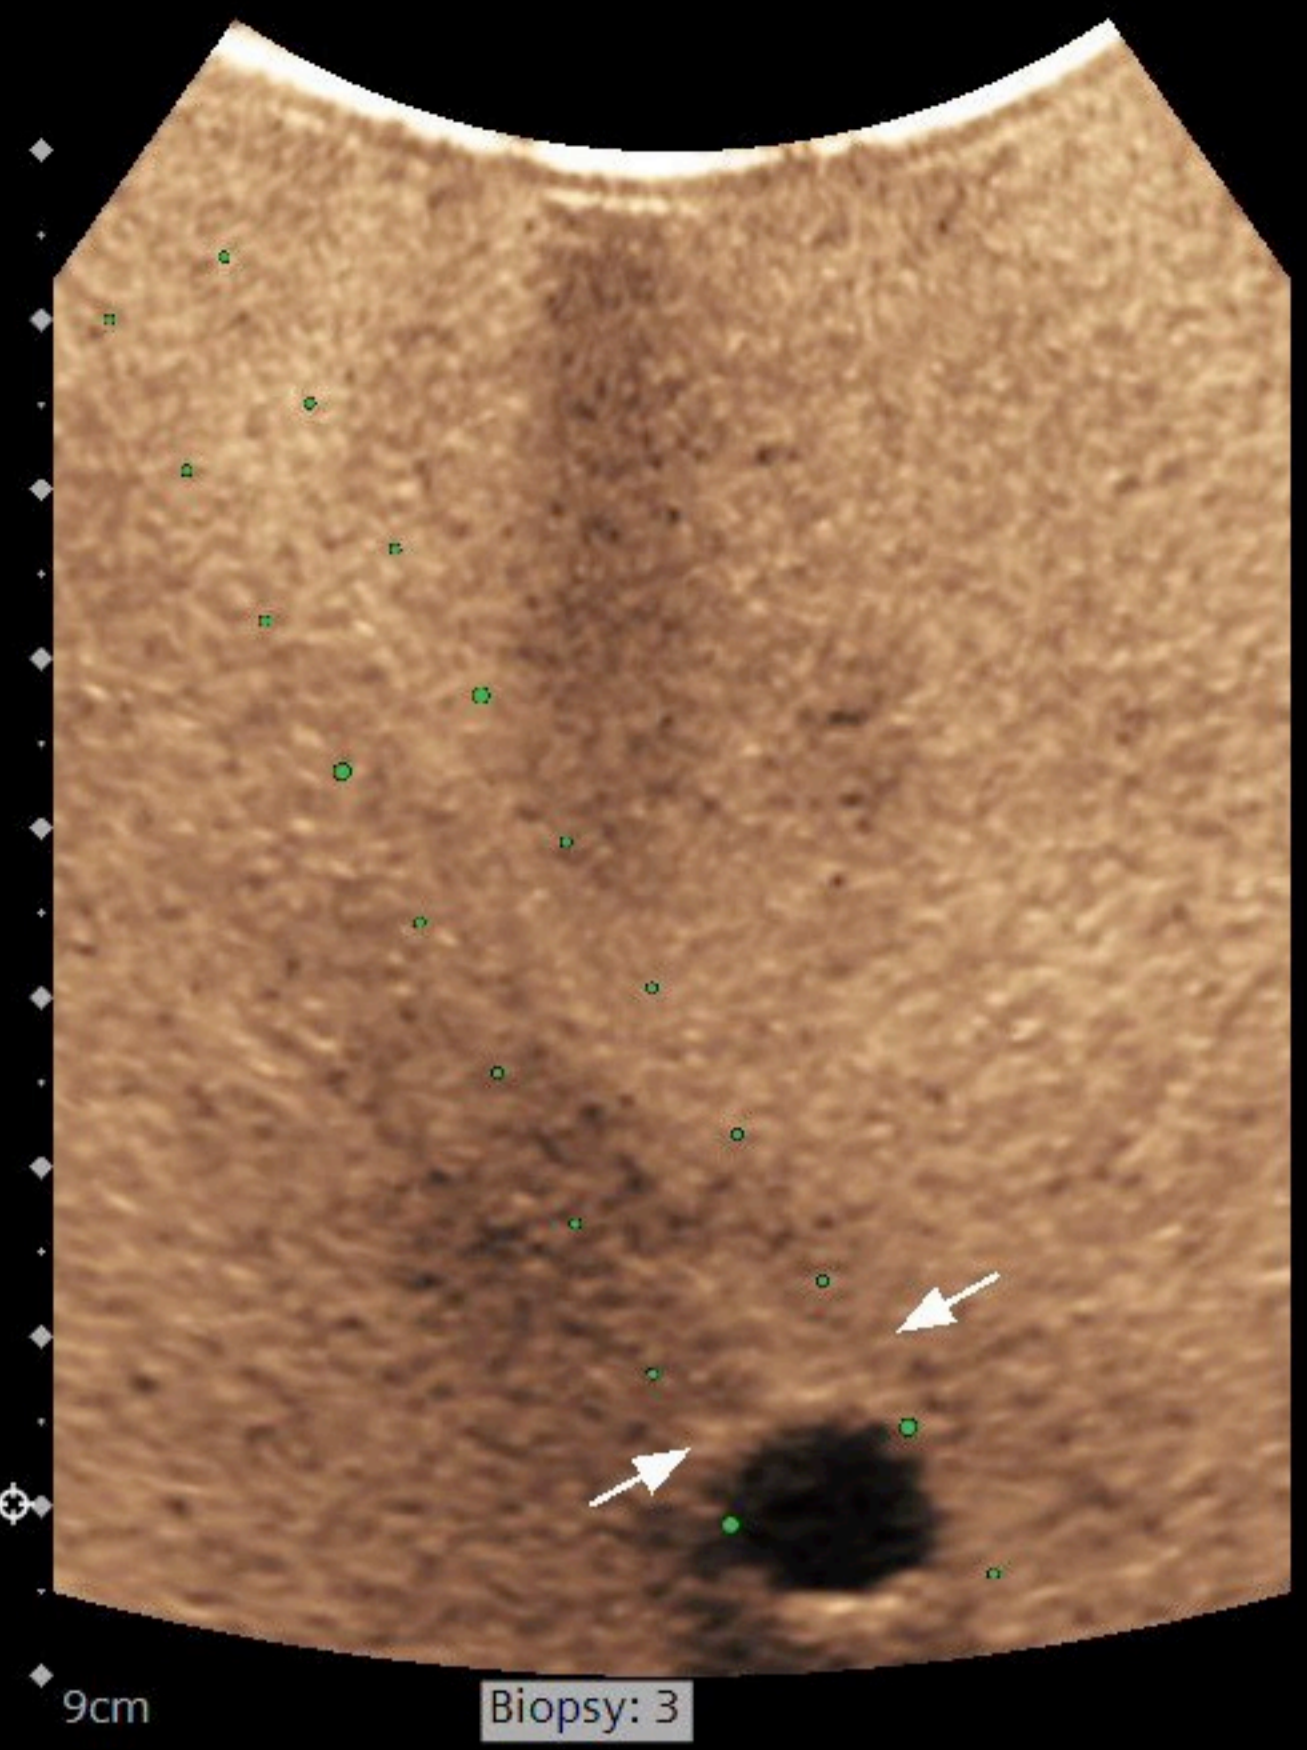

1st puncture

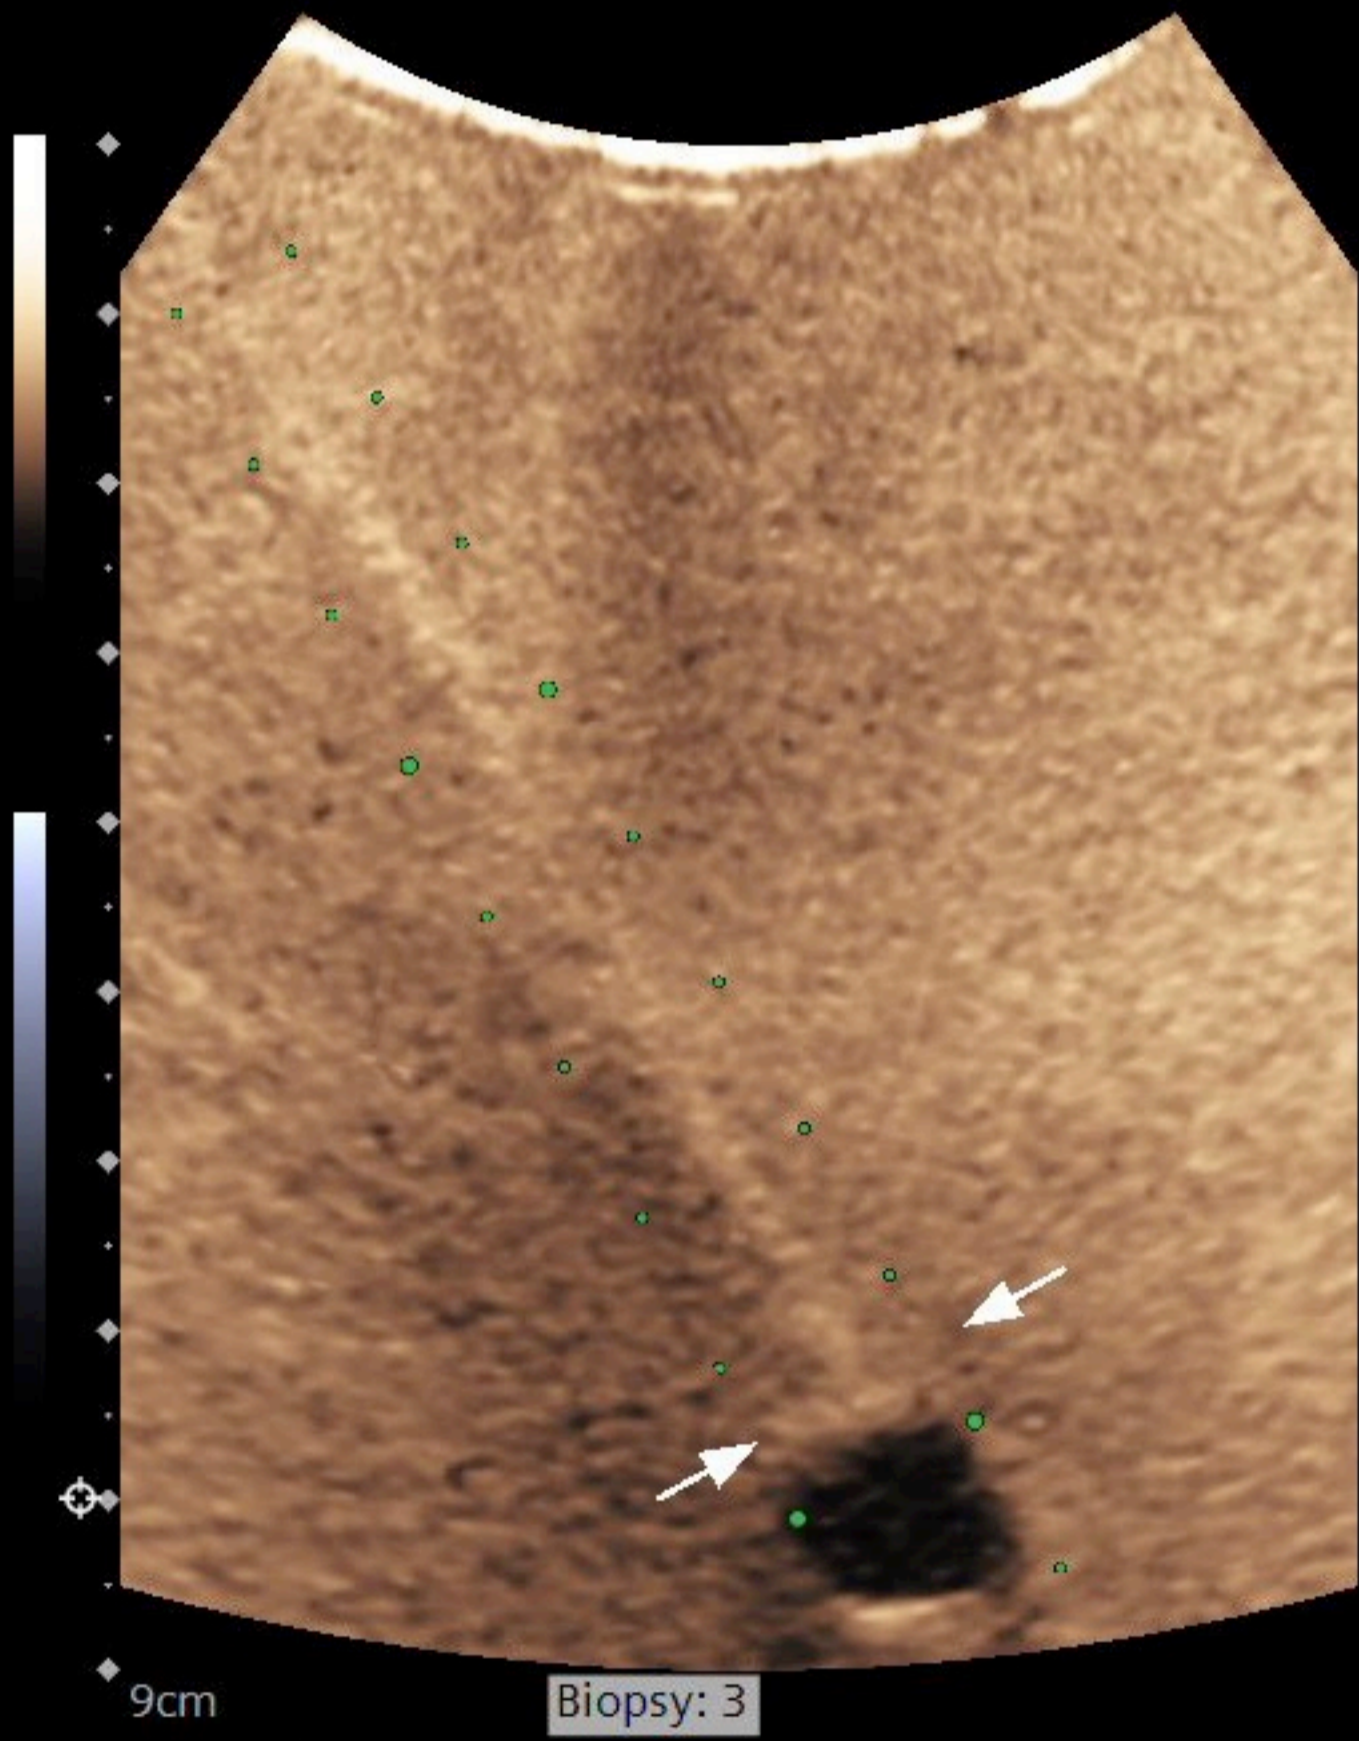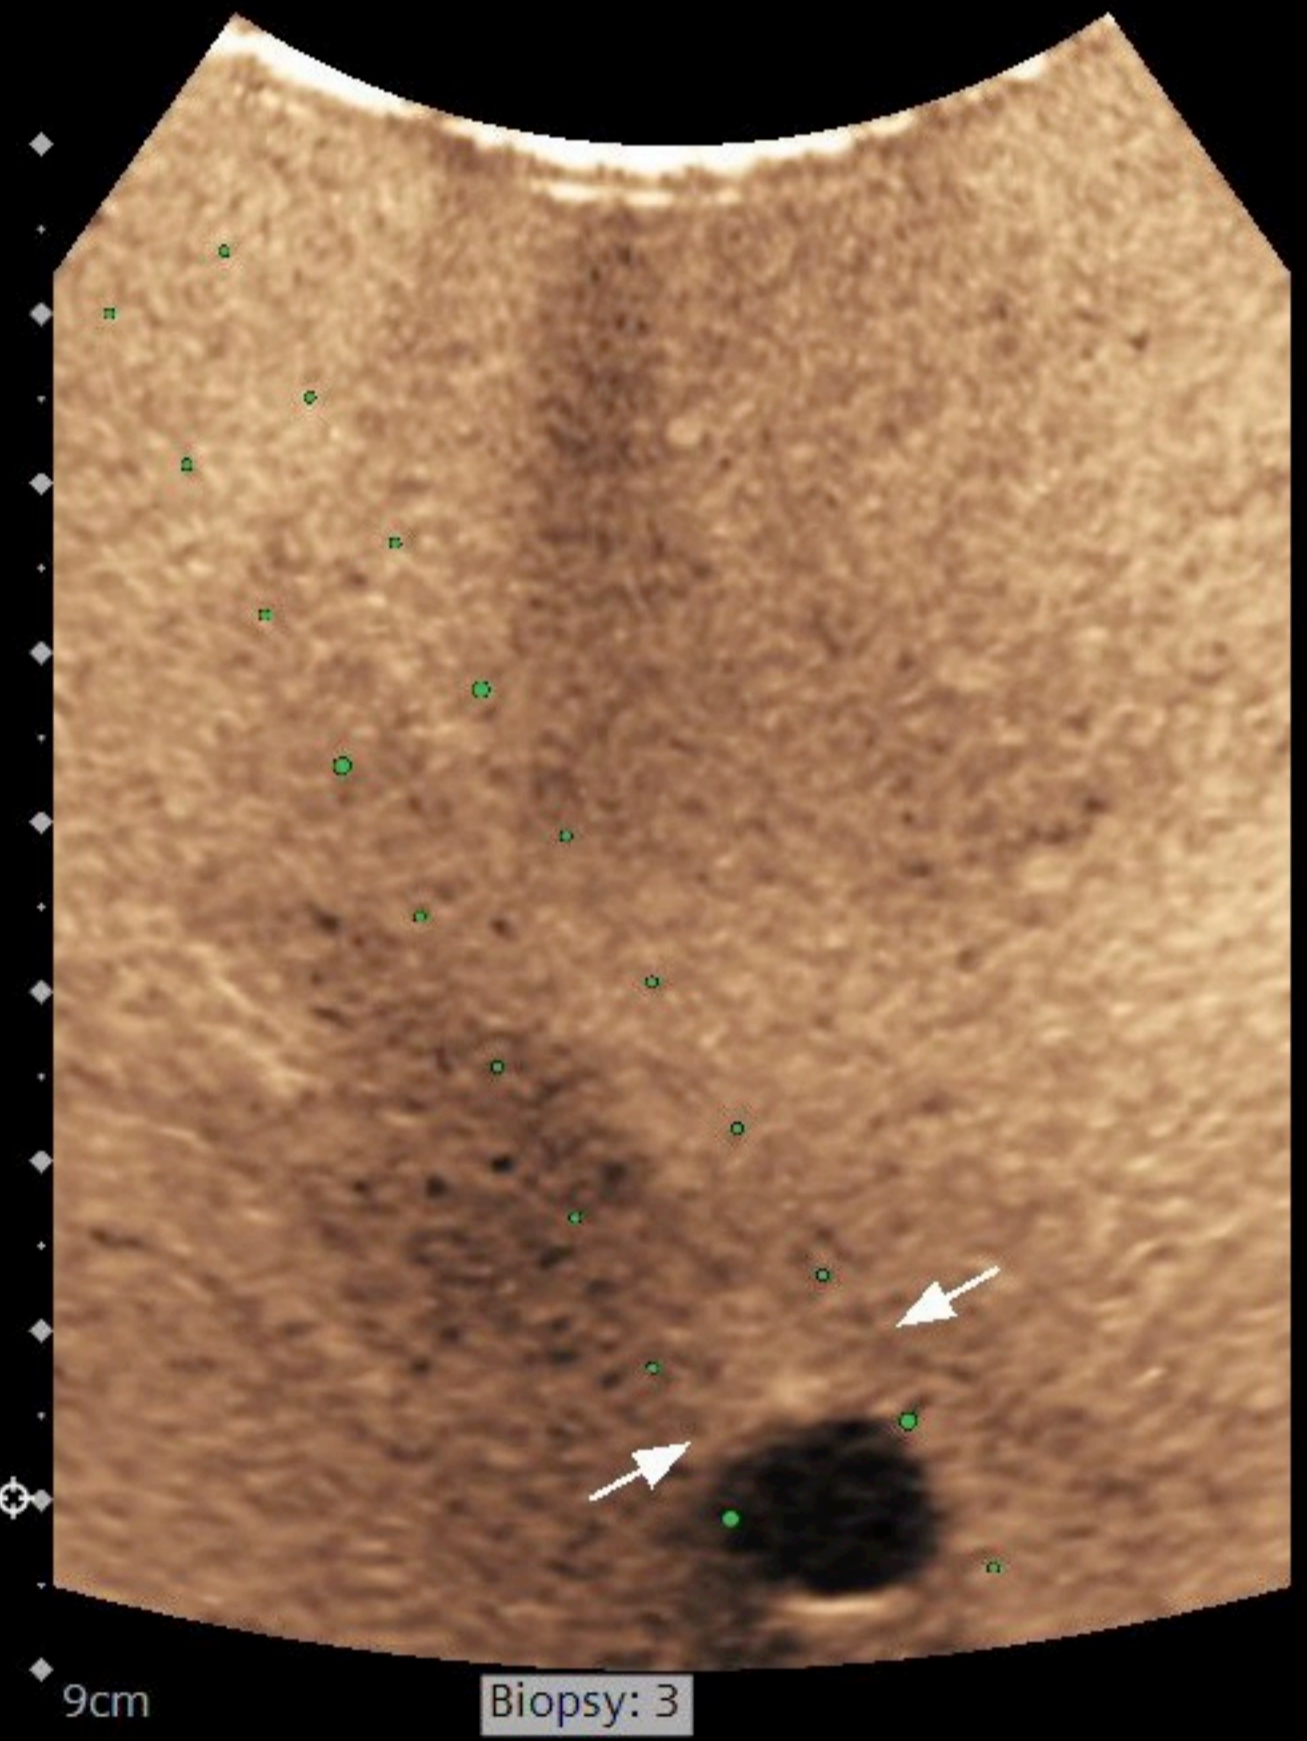

2nd puncture

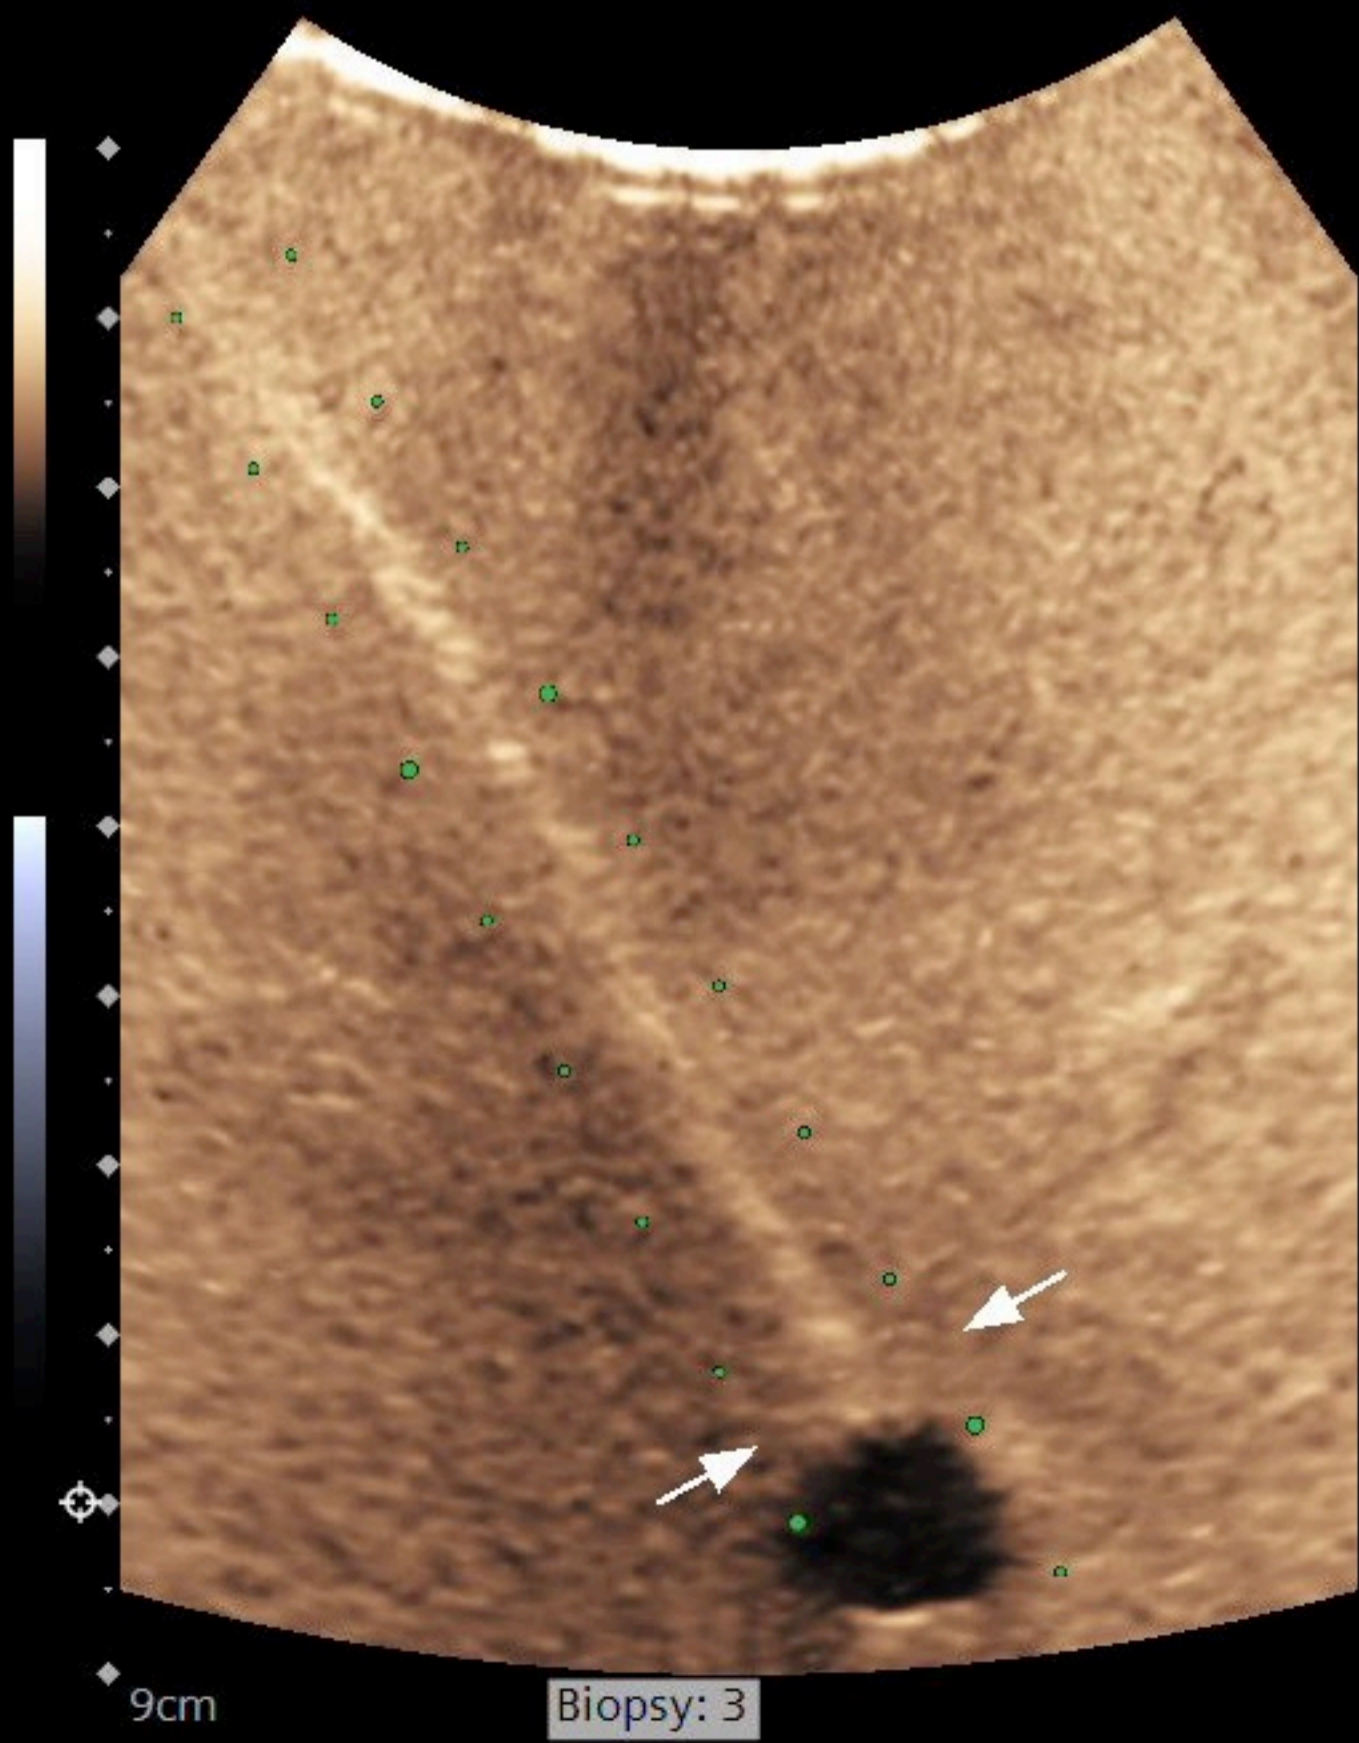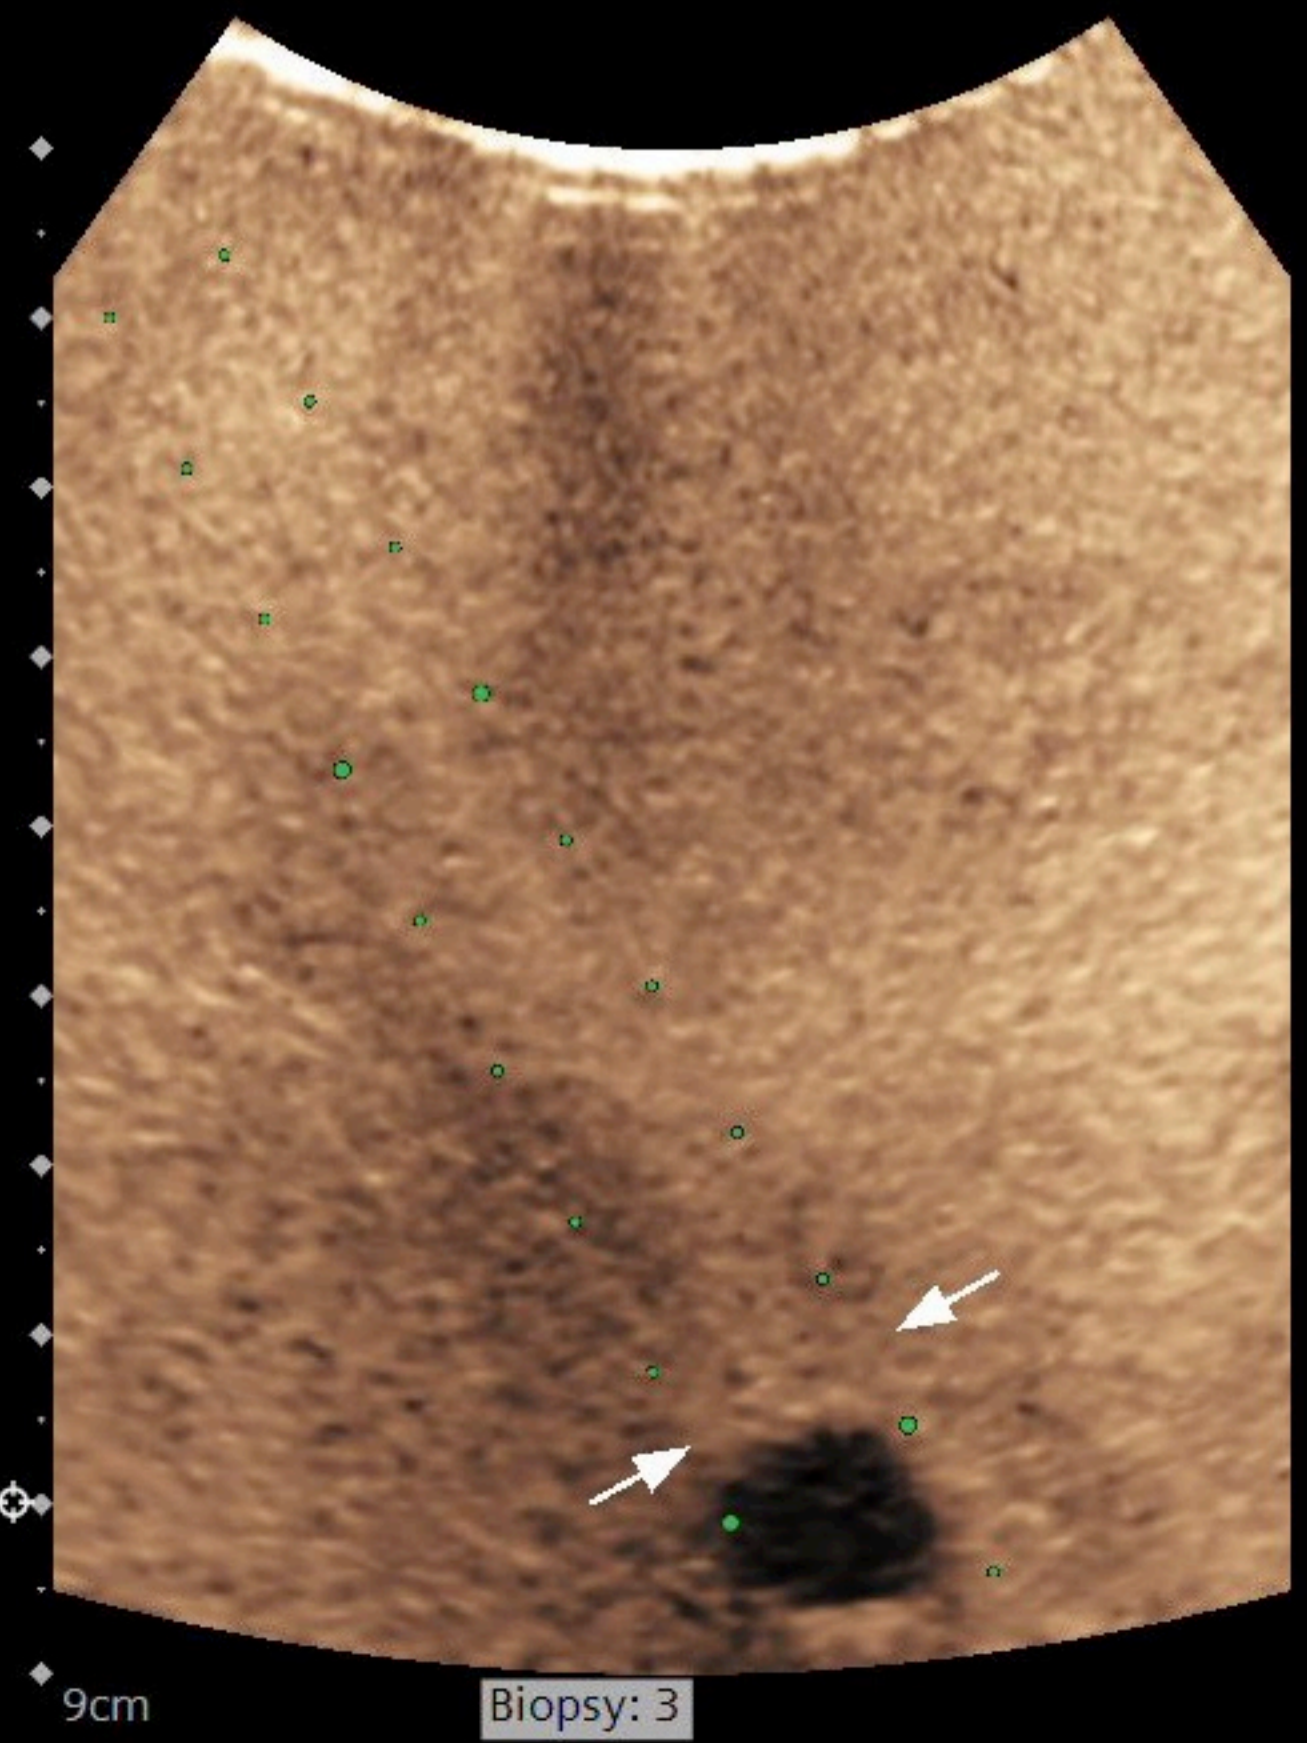

3rd puncture

Ultrasound contrast agent

Control



Side-notch biopsy needle (set 9/10)

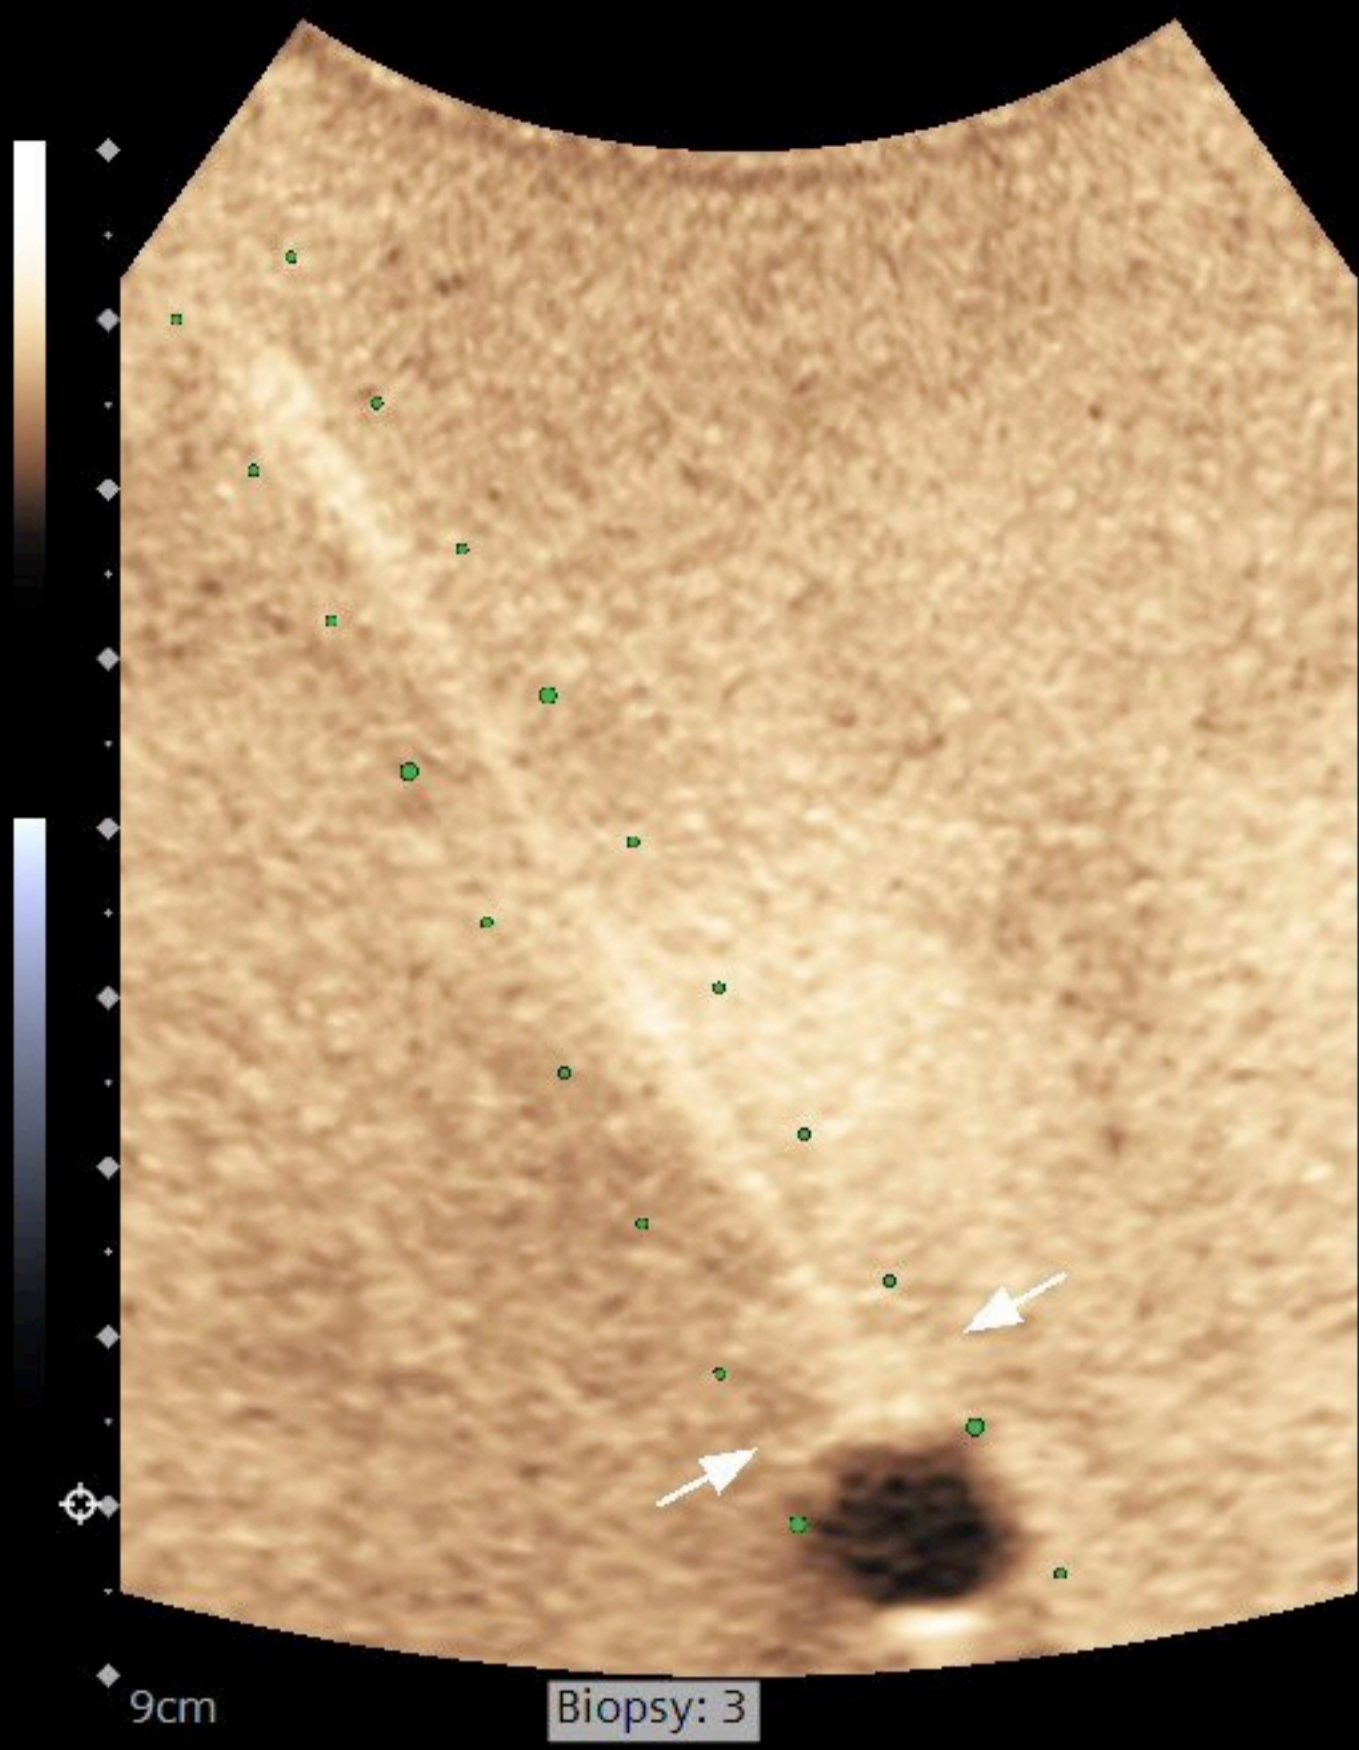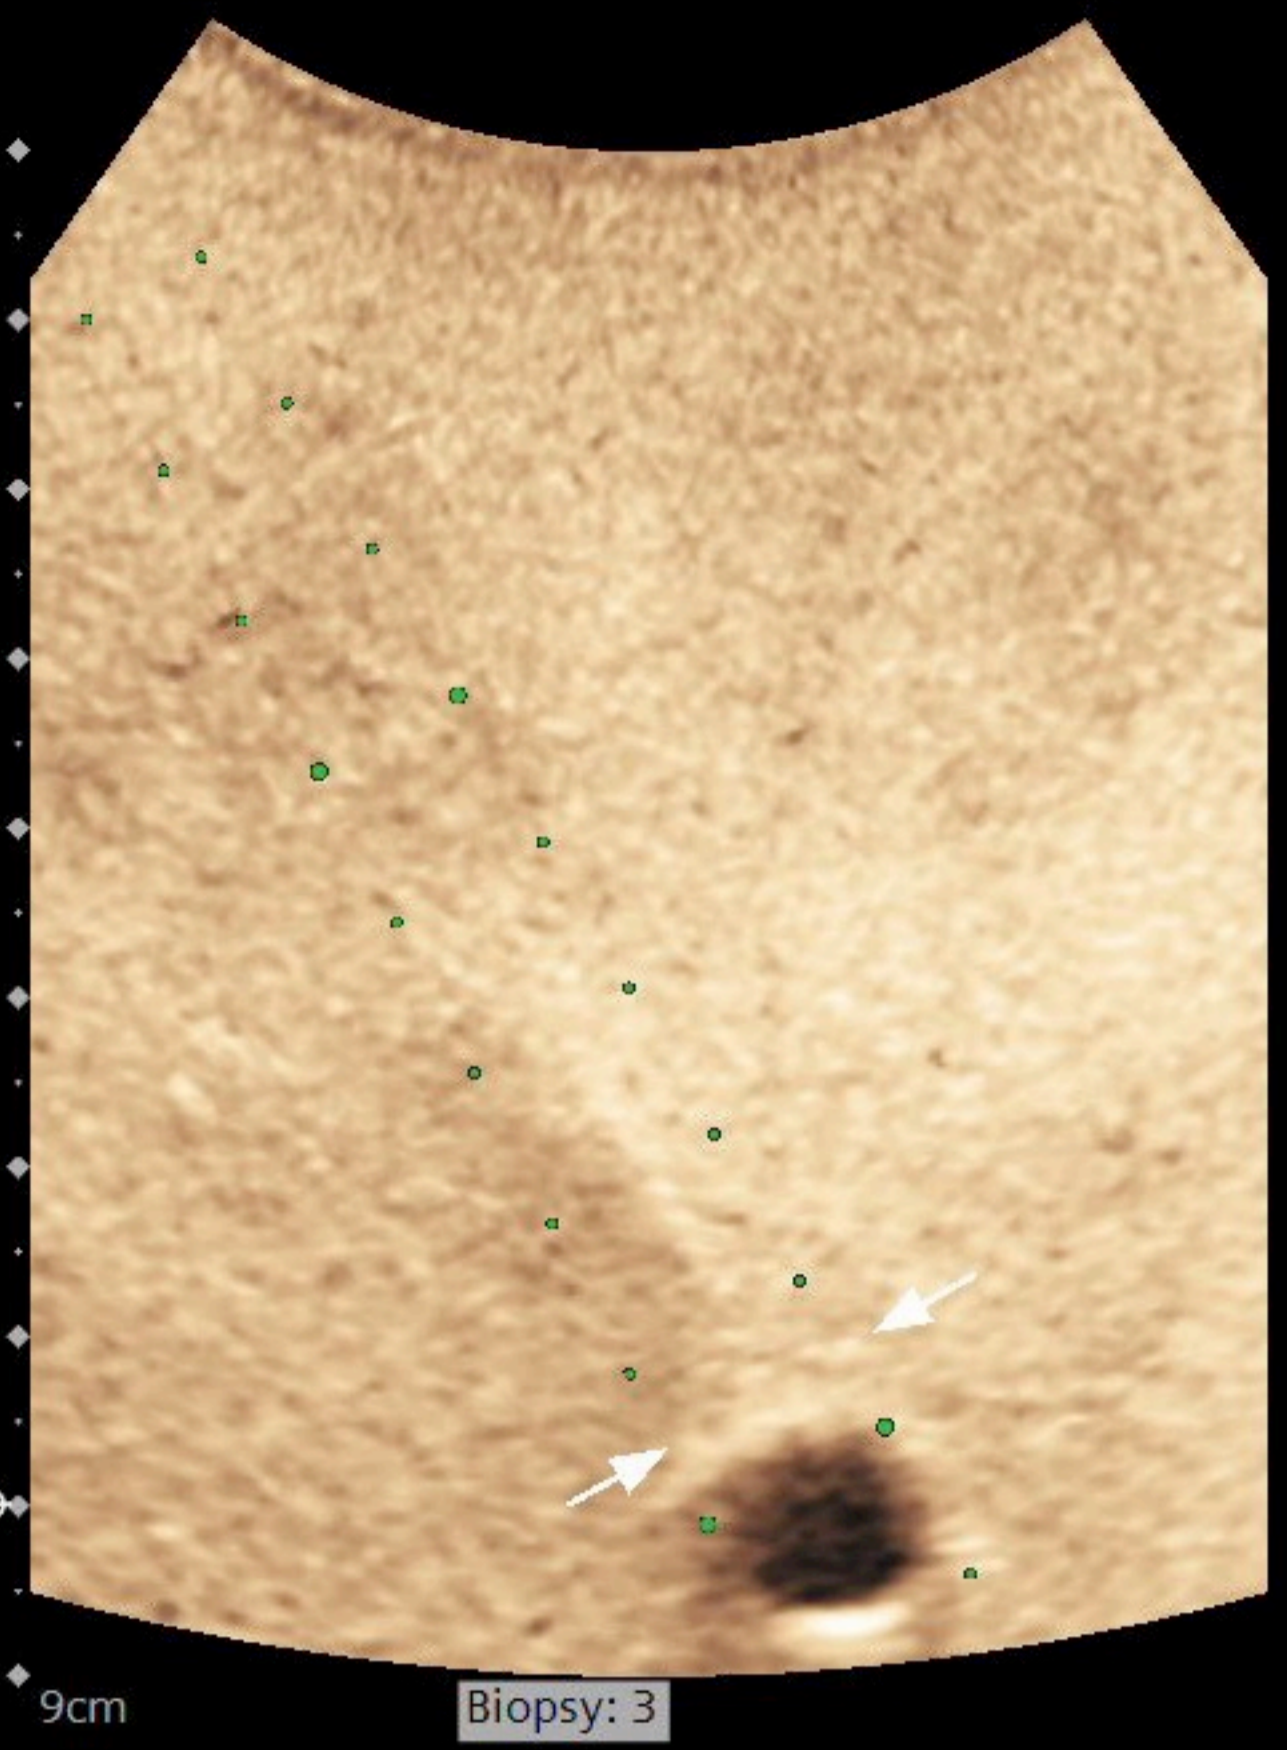

1st puncture

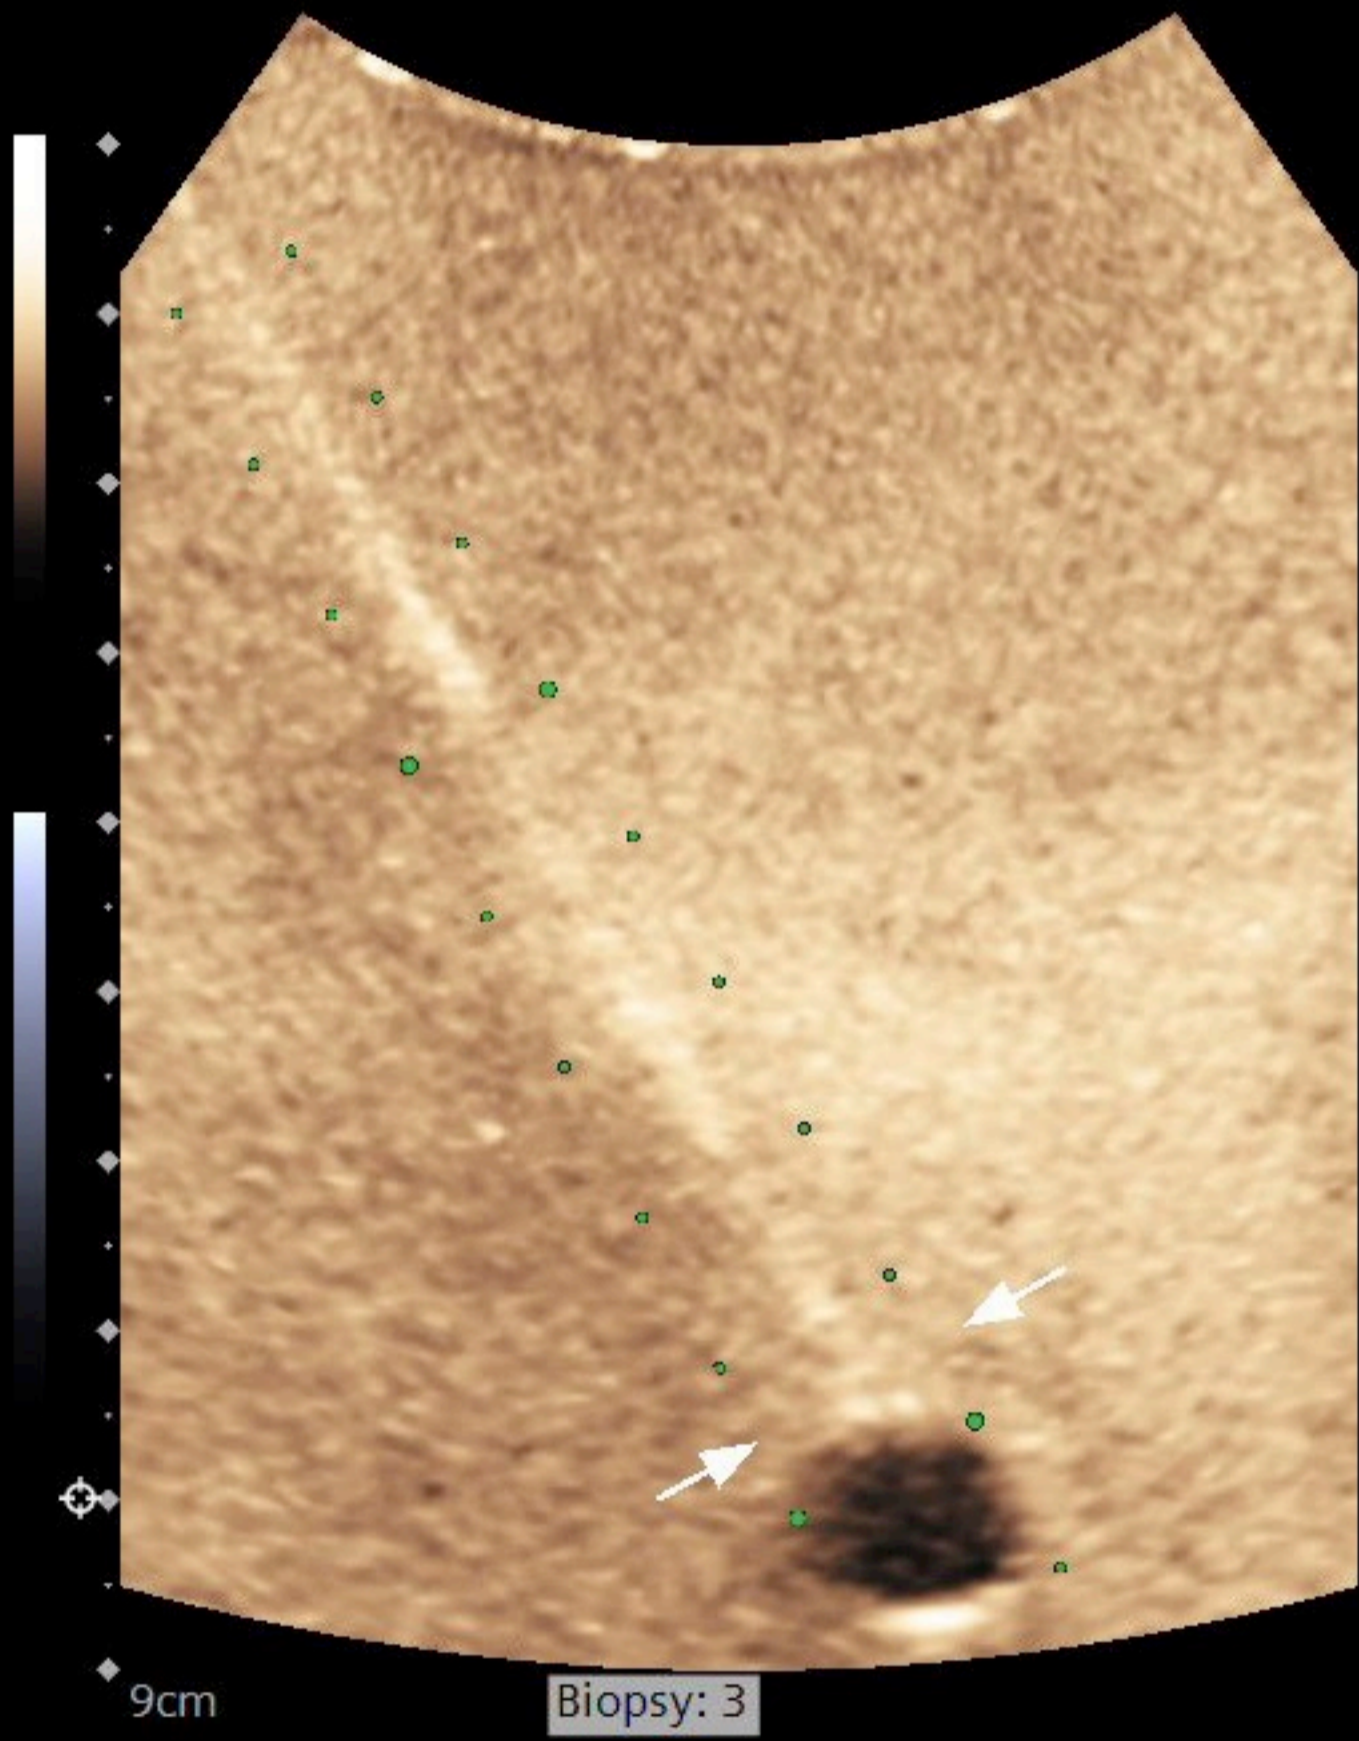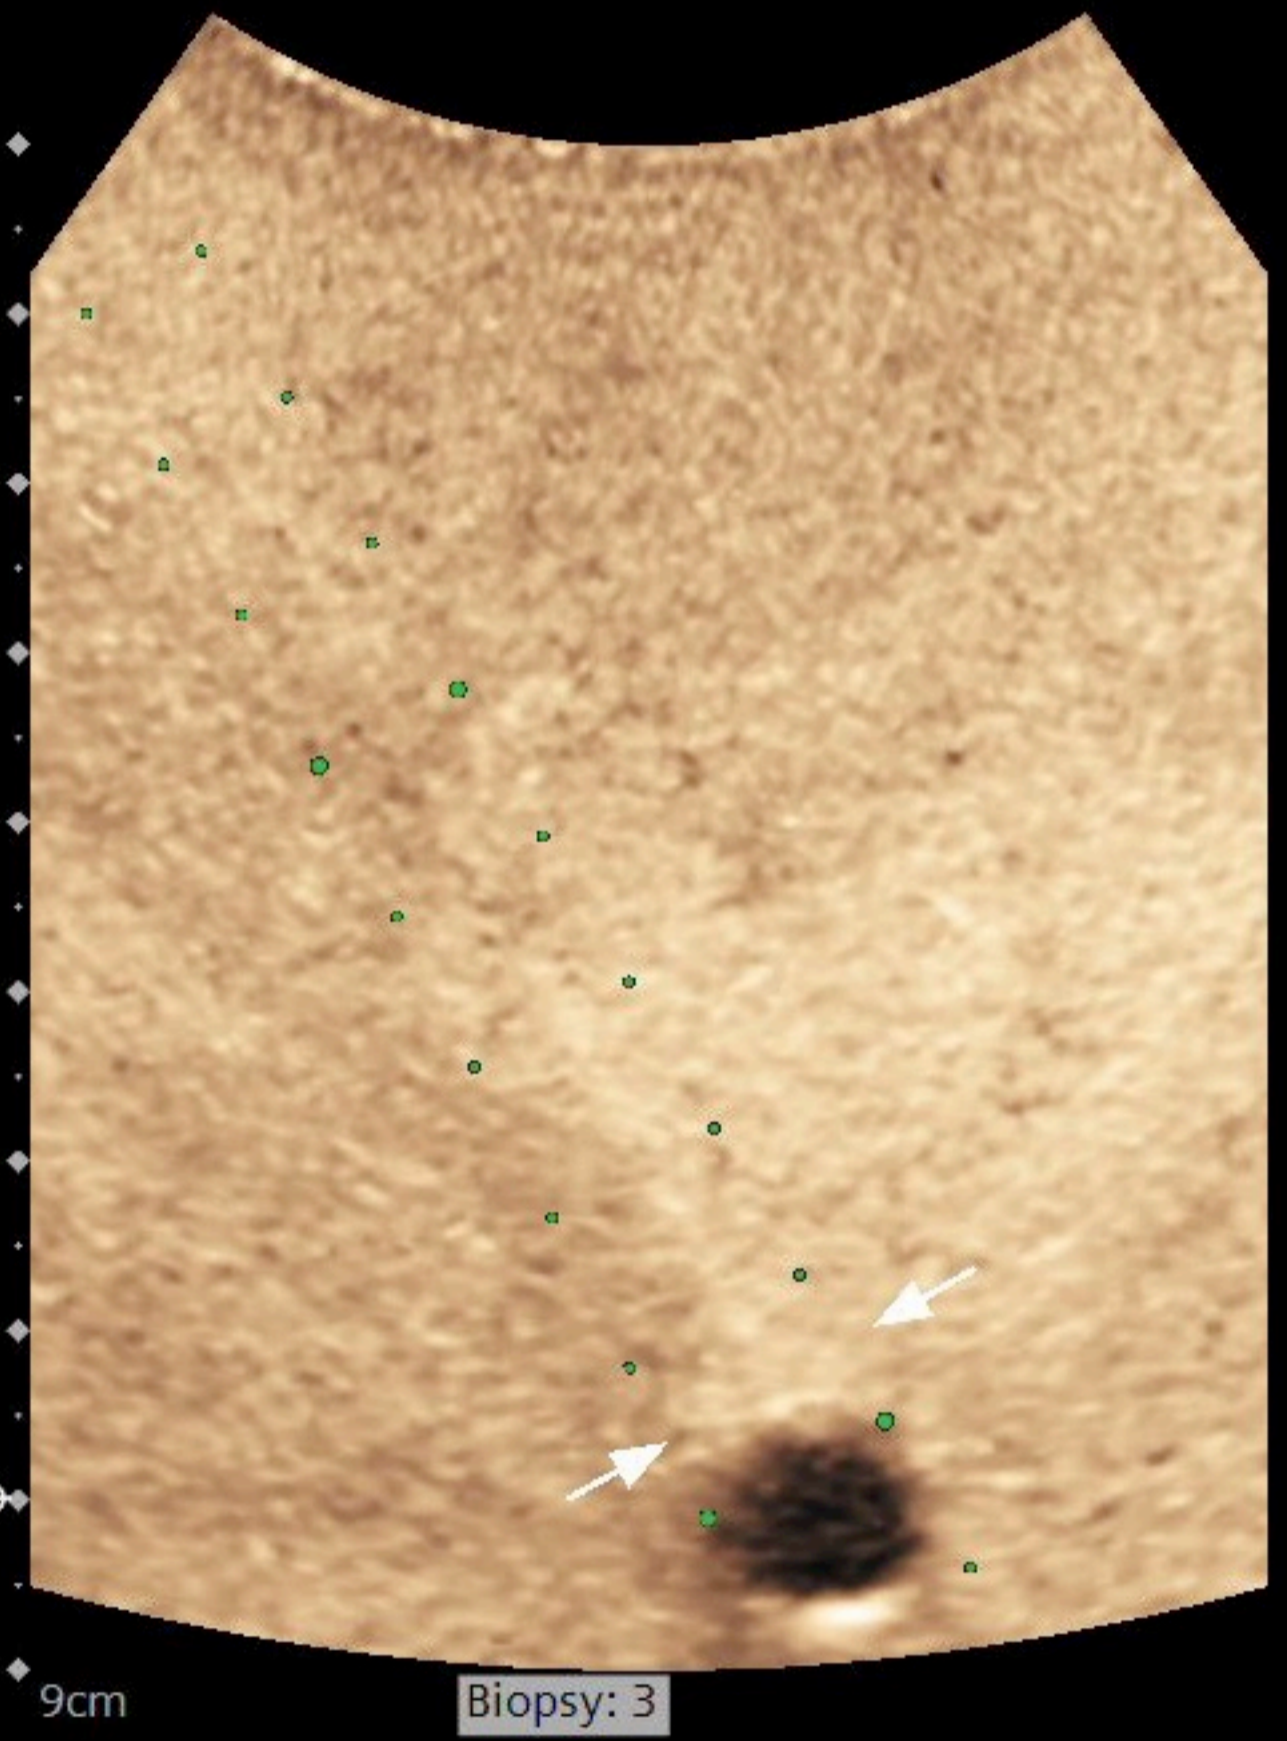

2nd puncture

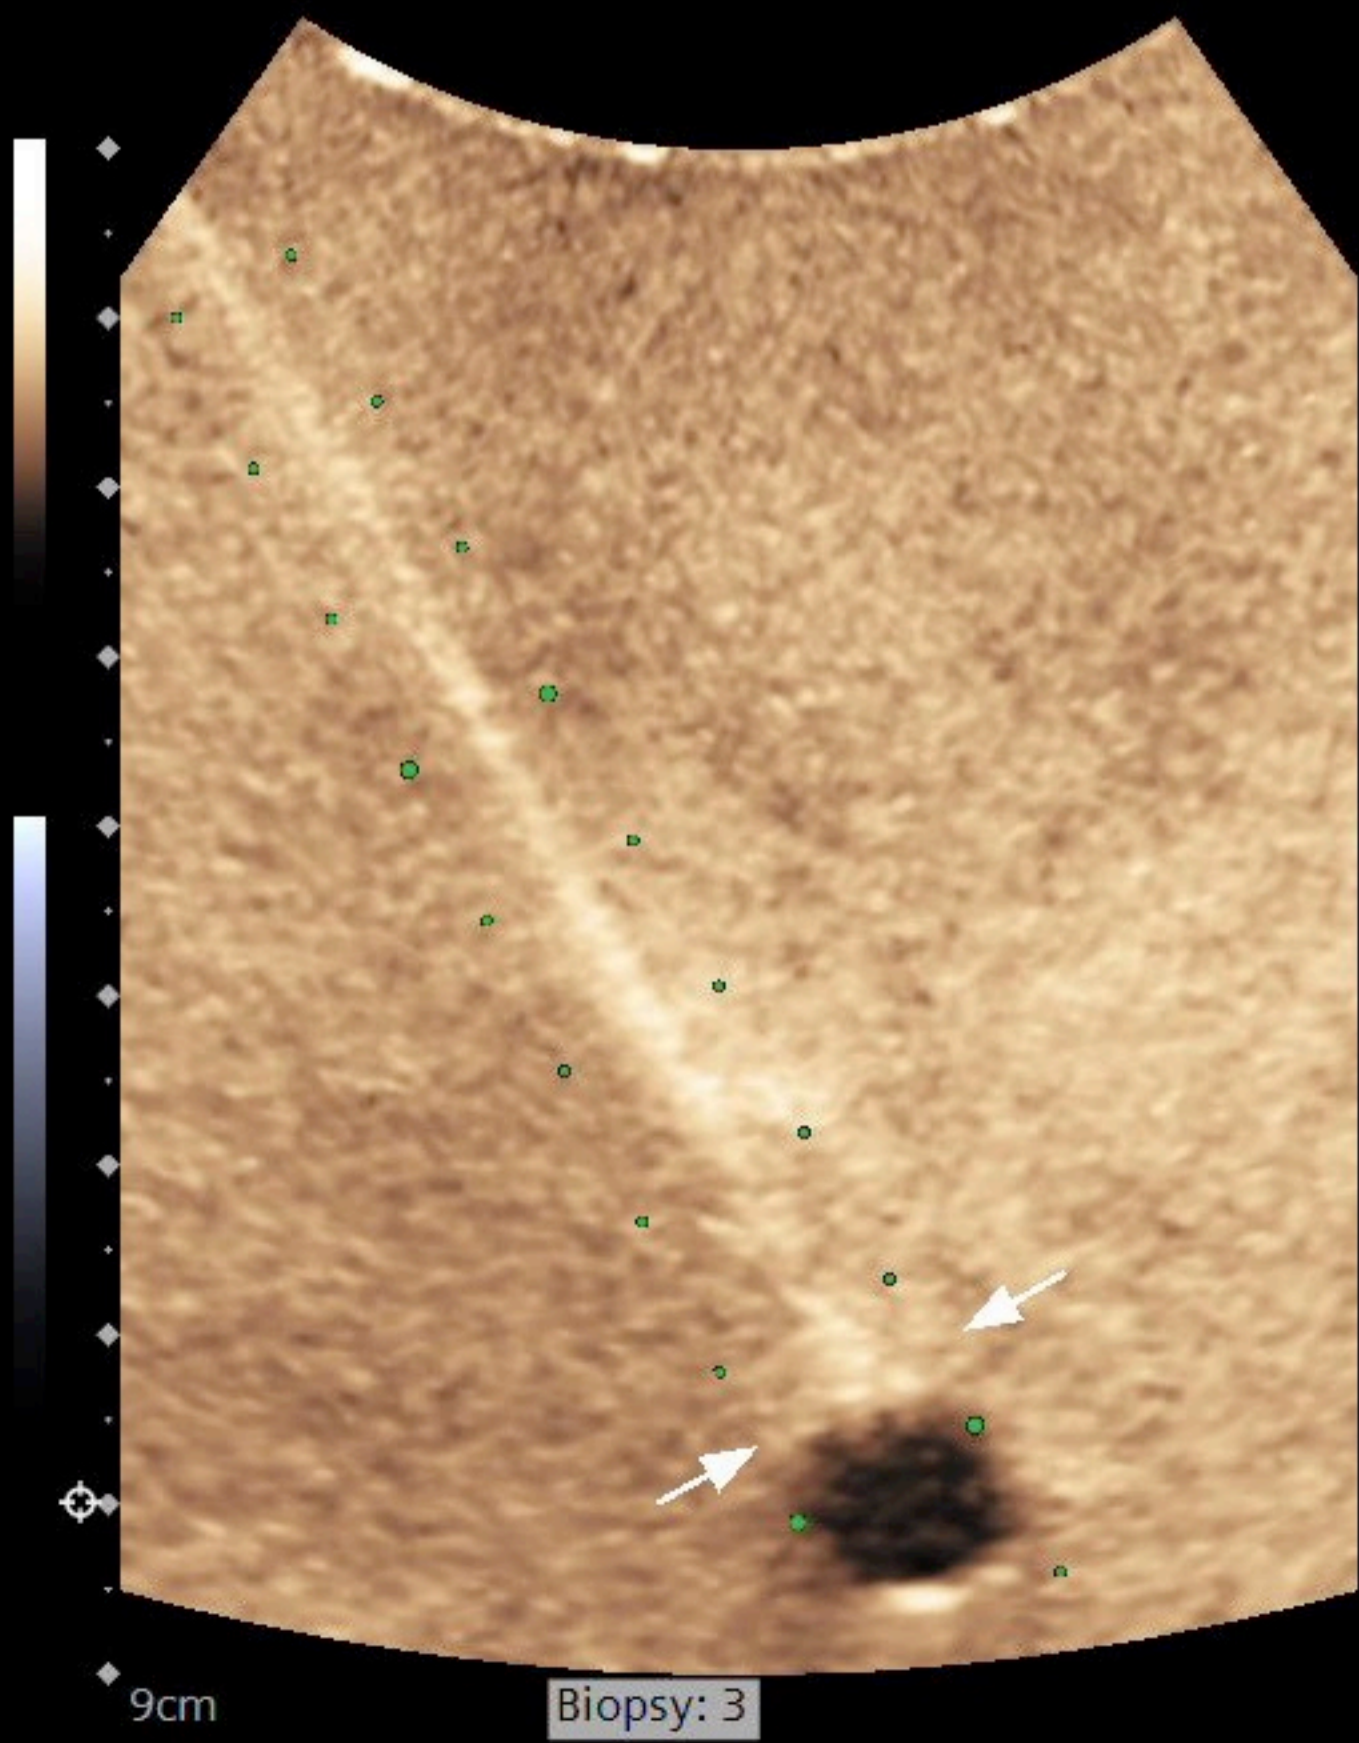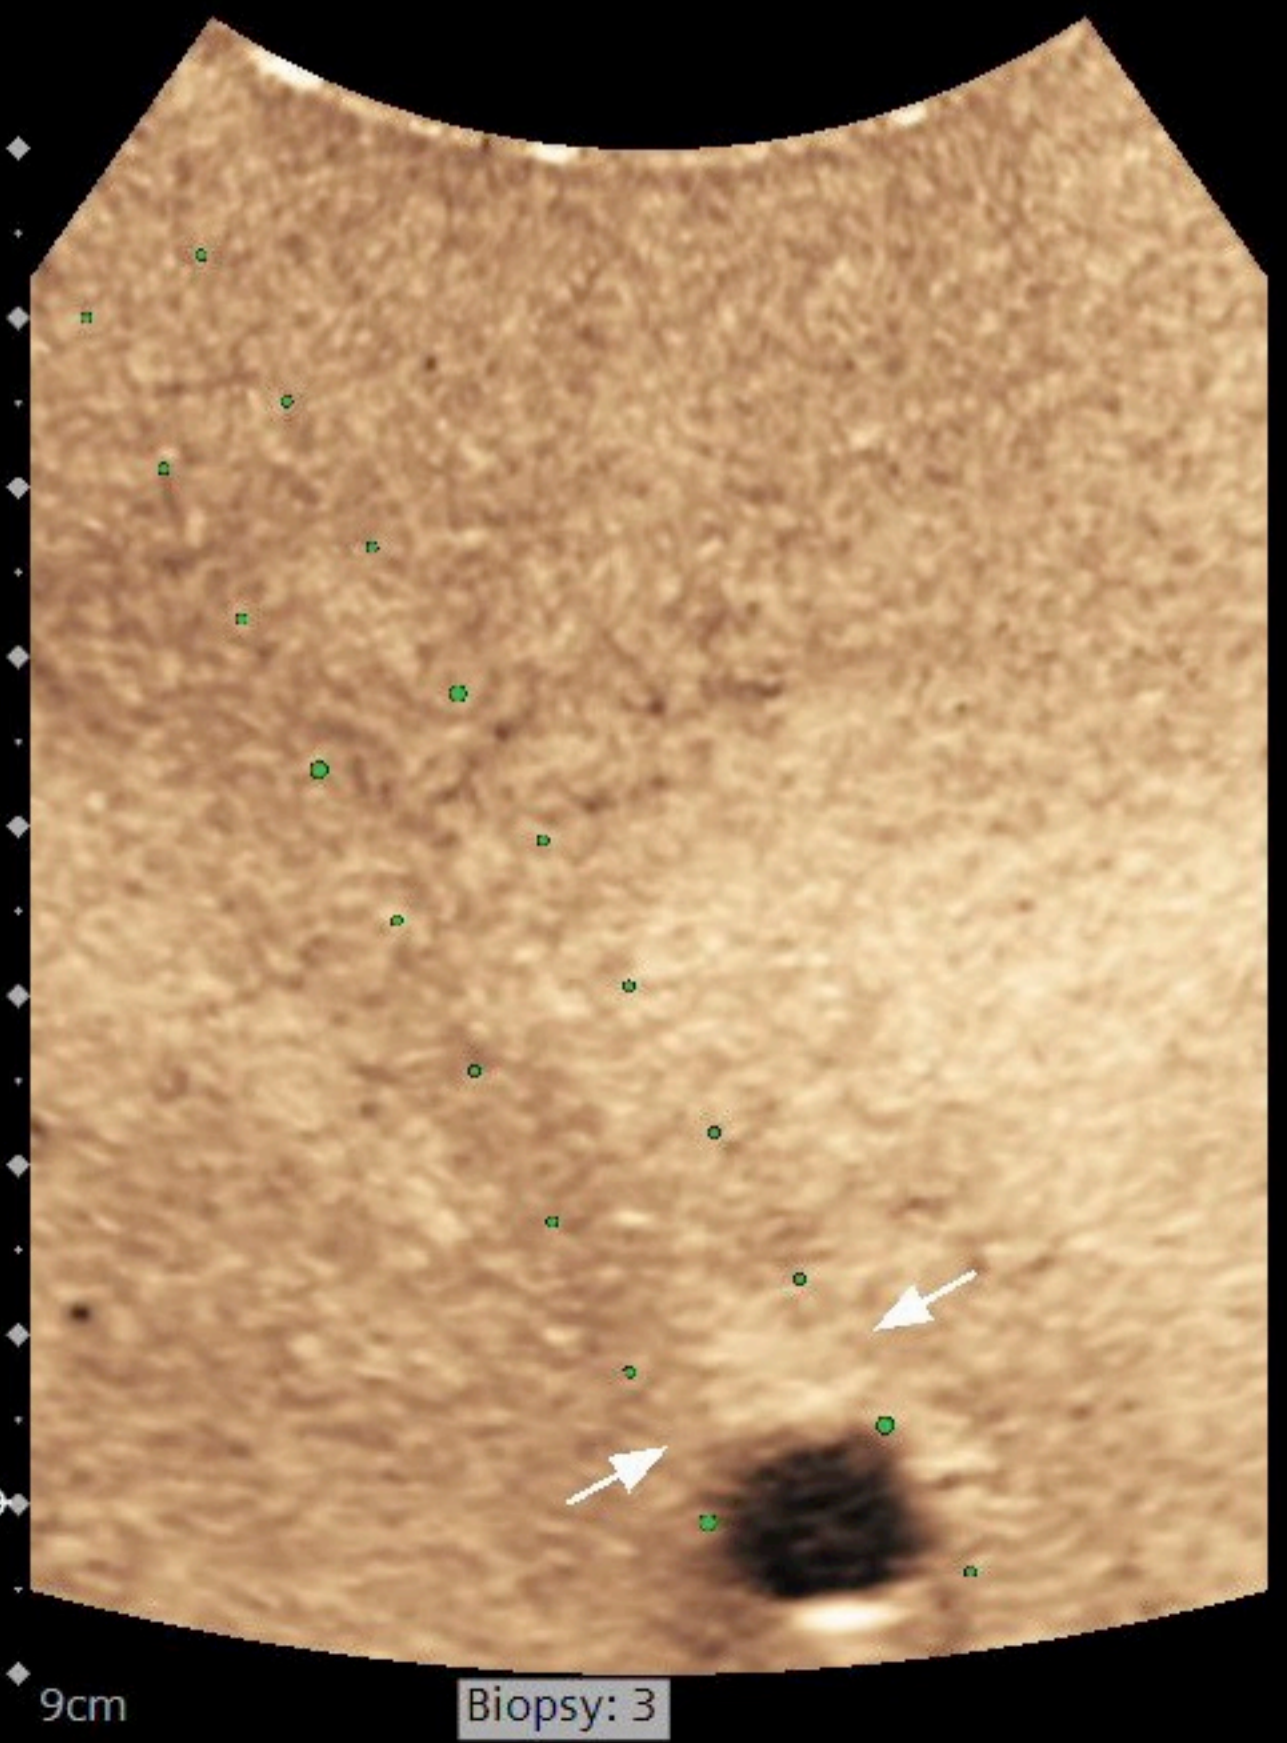

3rd puncture

Ultrasound contrast agent

Control



Side-notch biopsy needle (set 10/10)

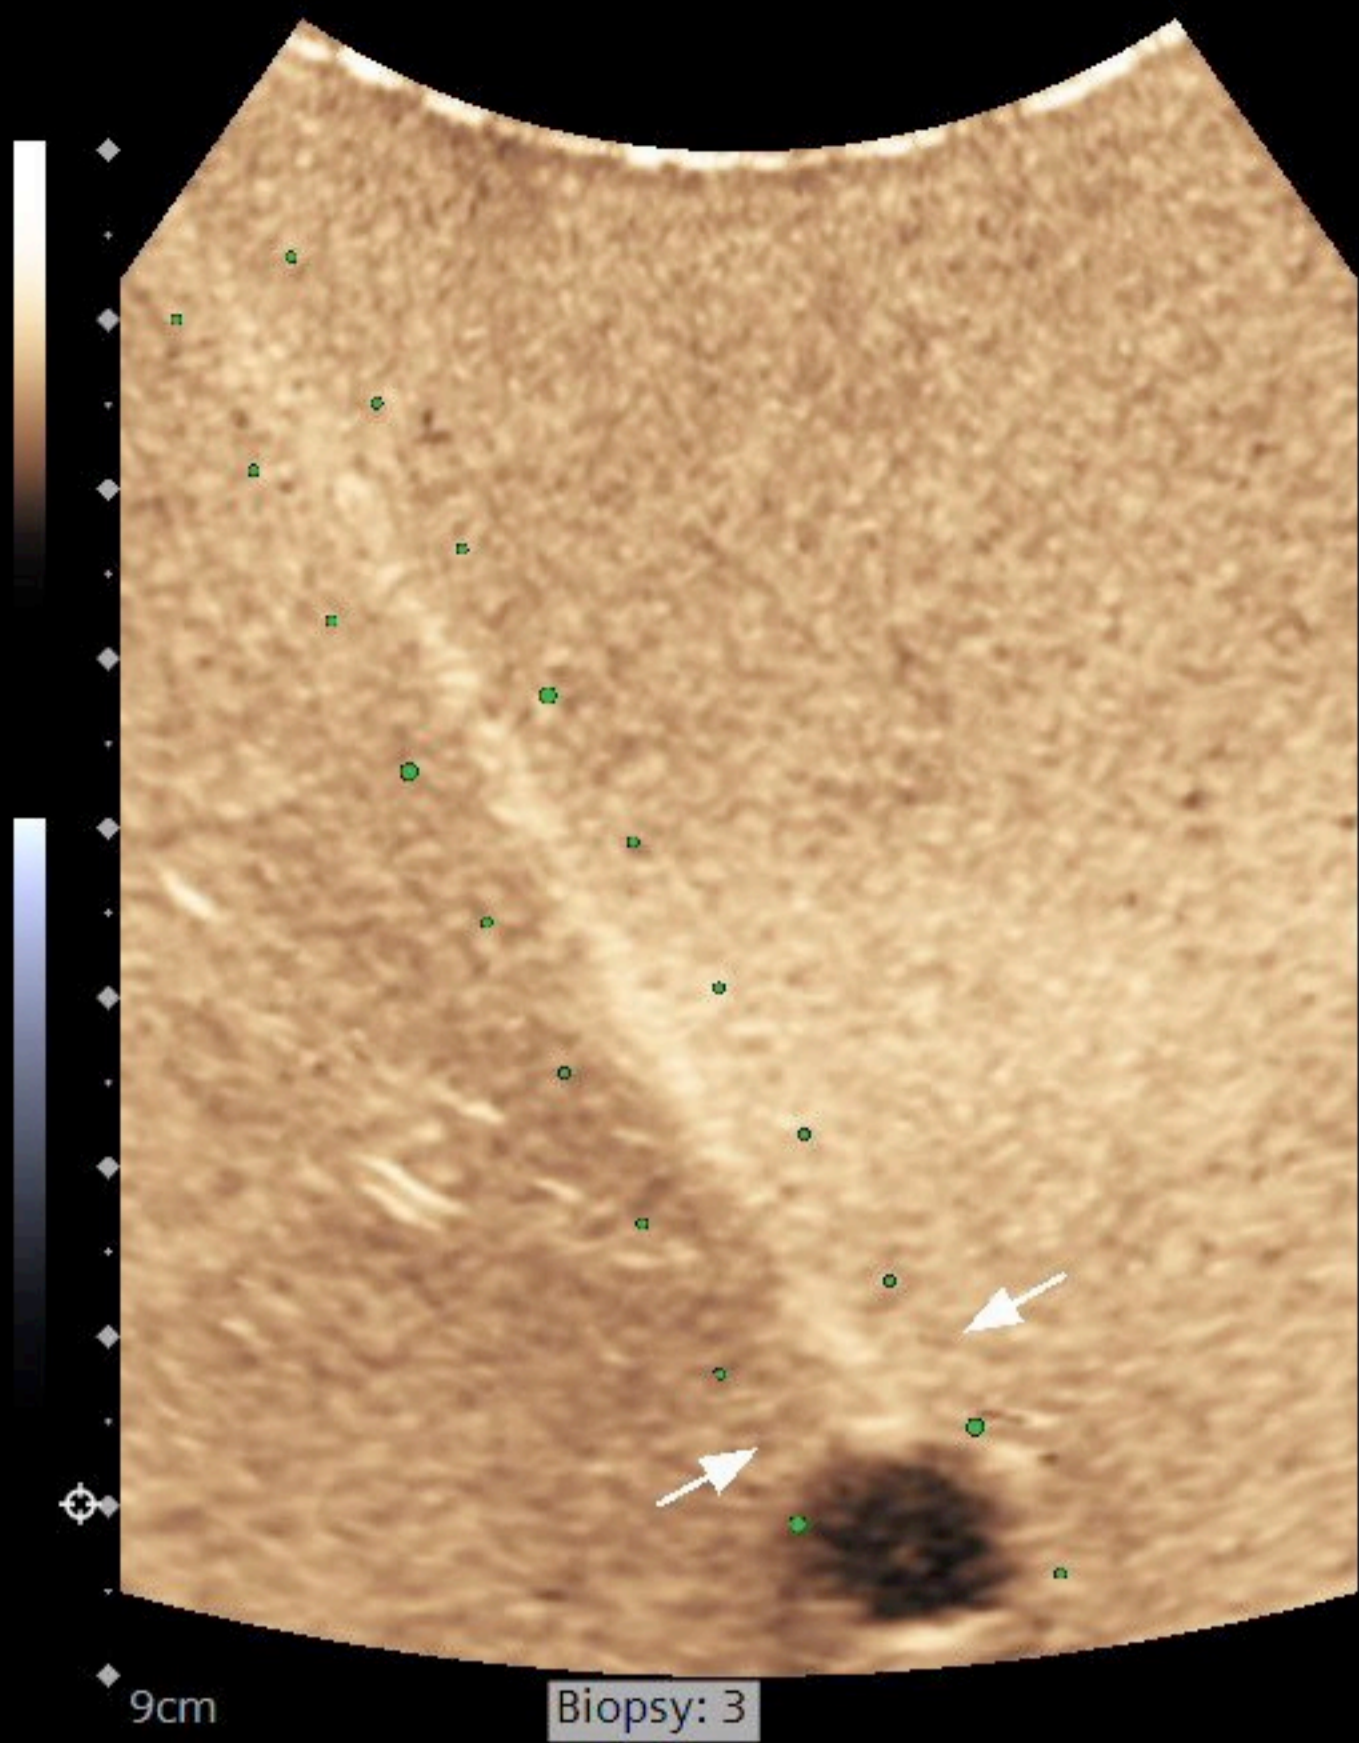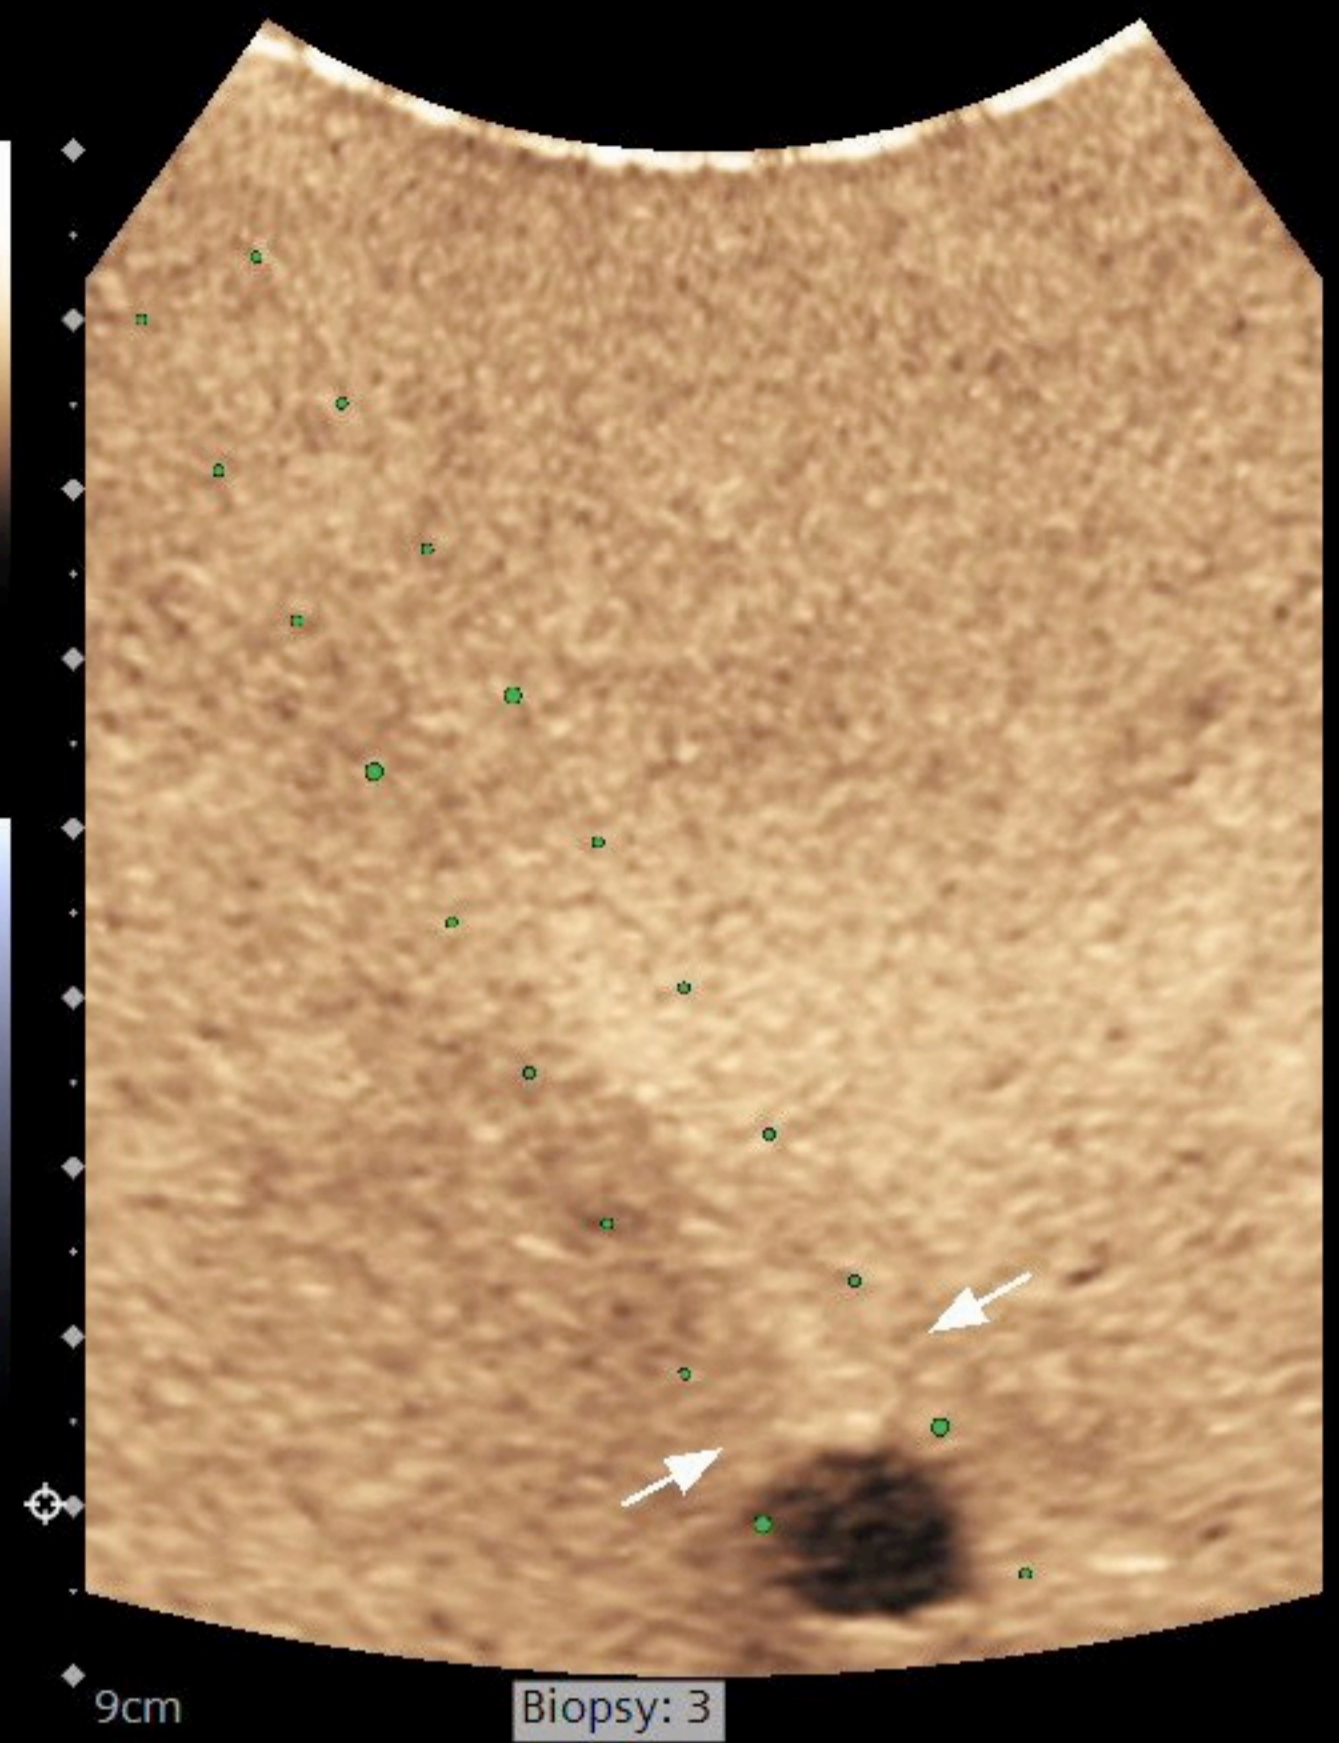

1st puncture

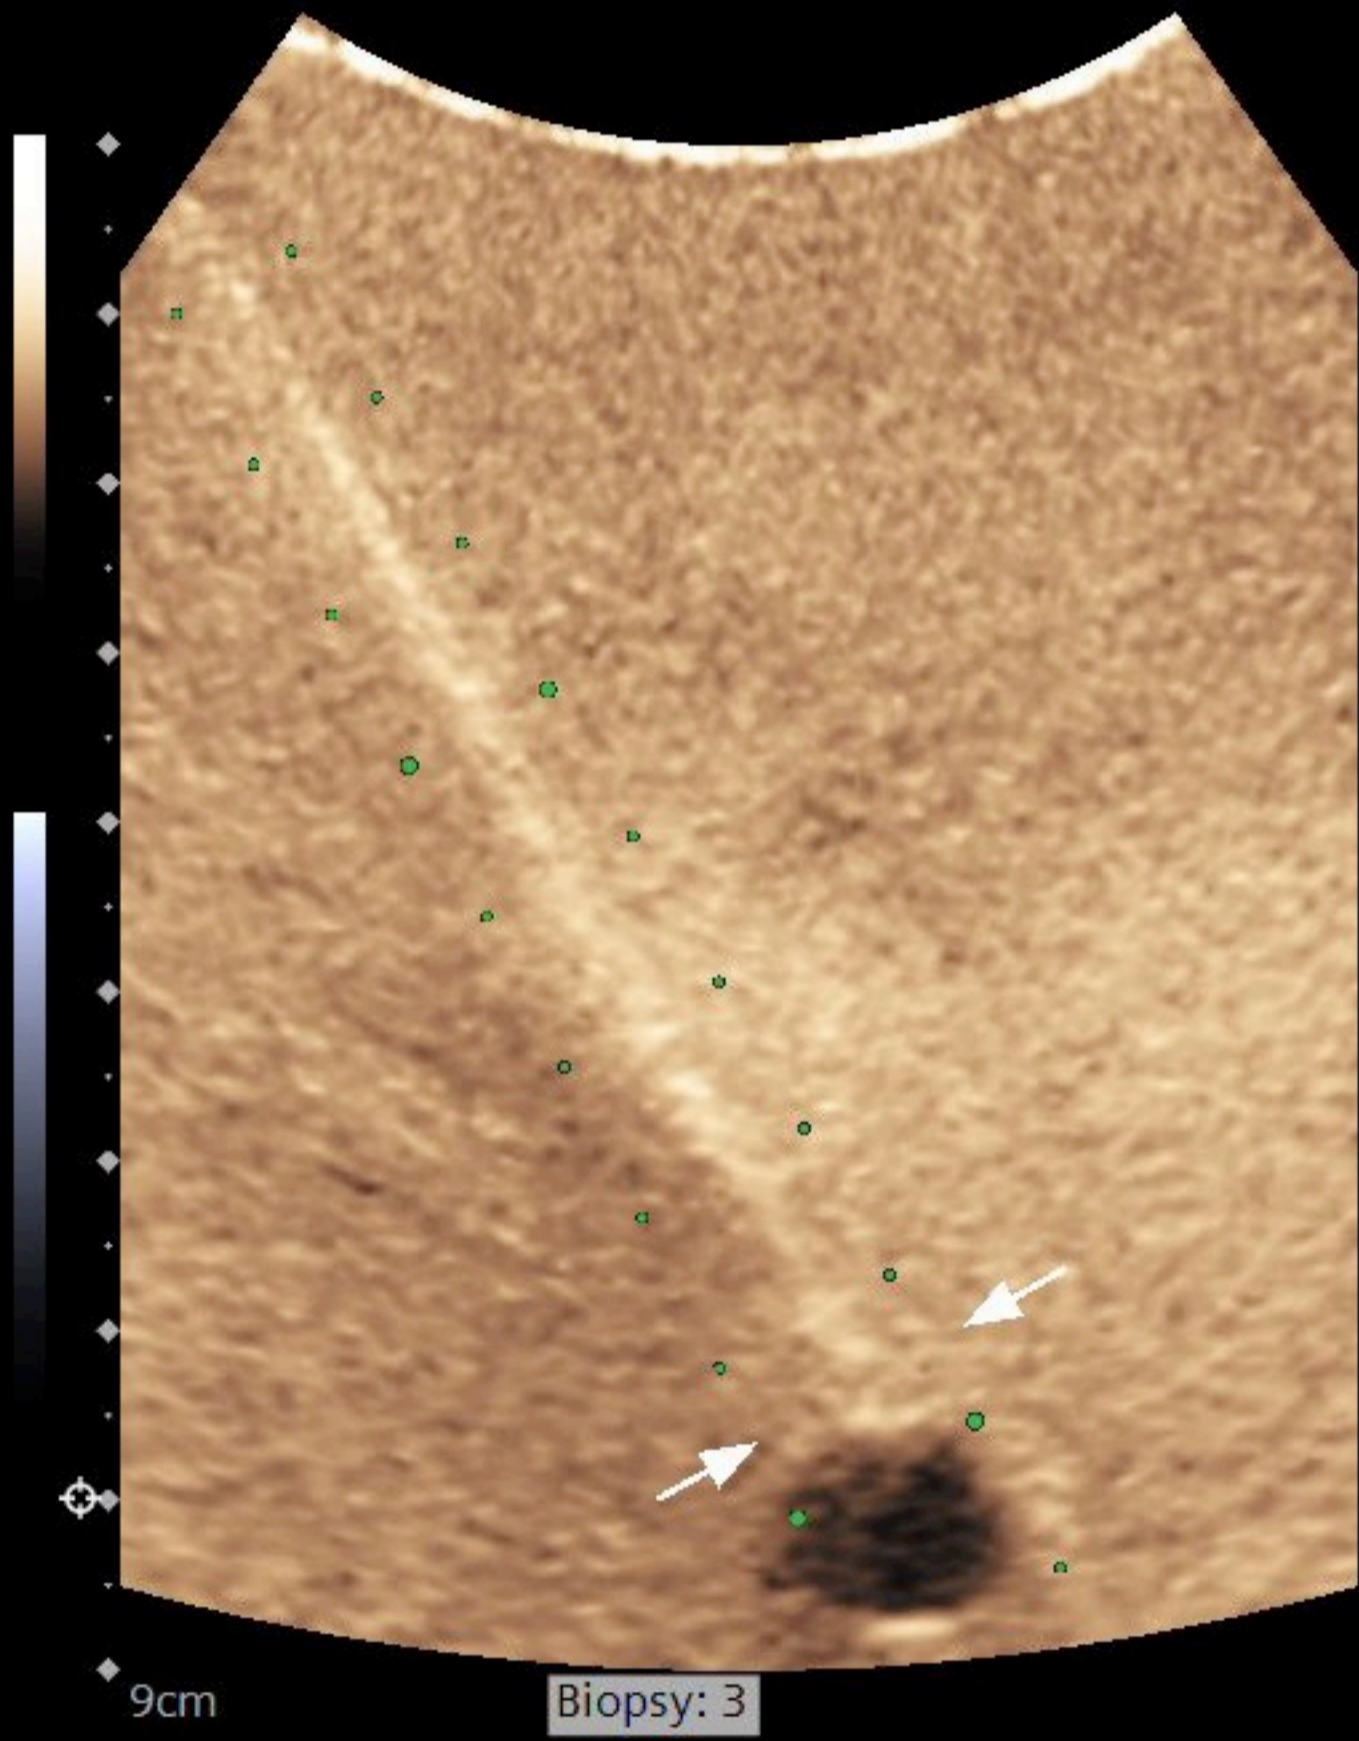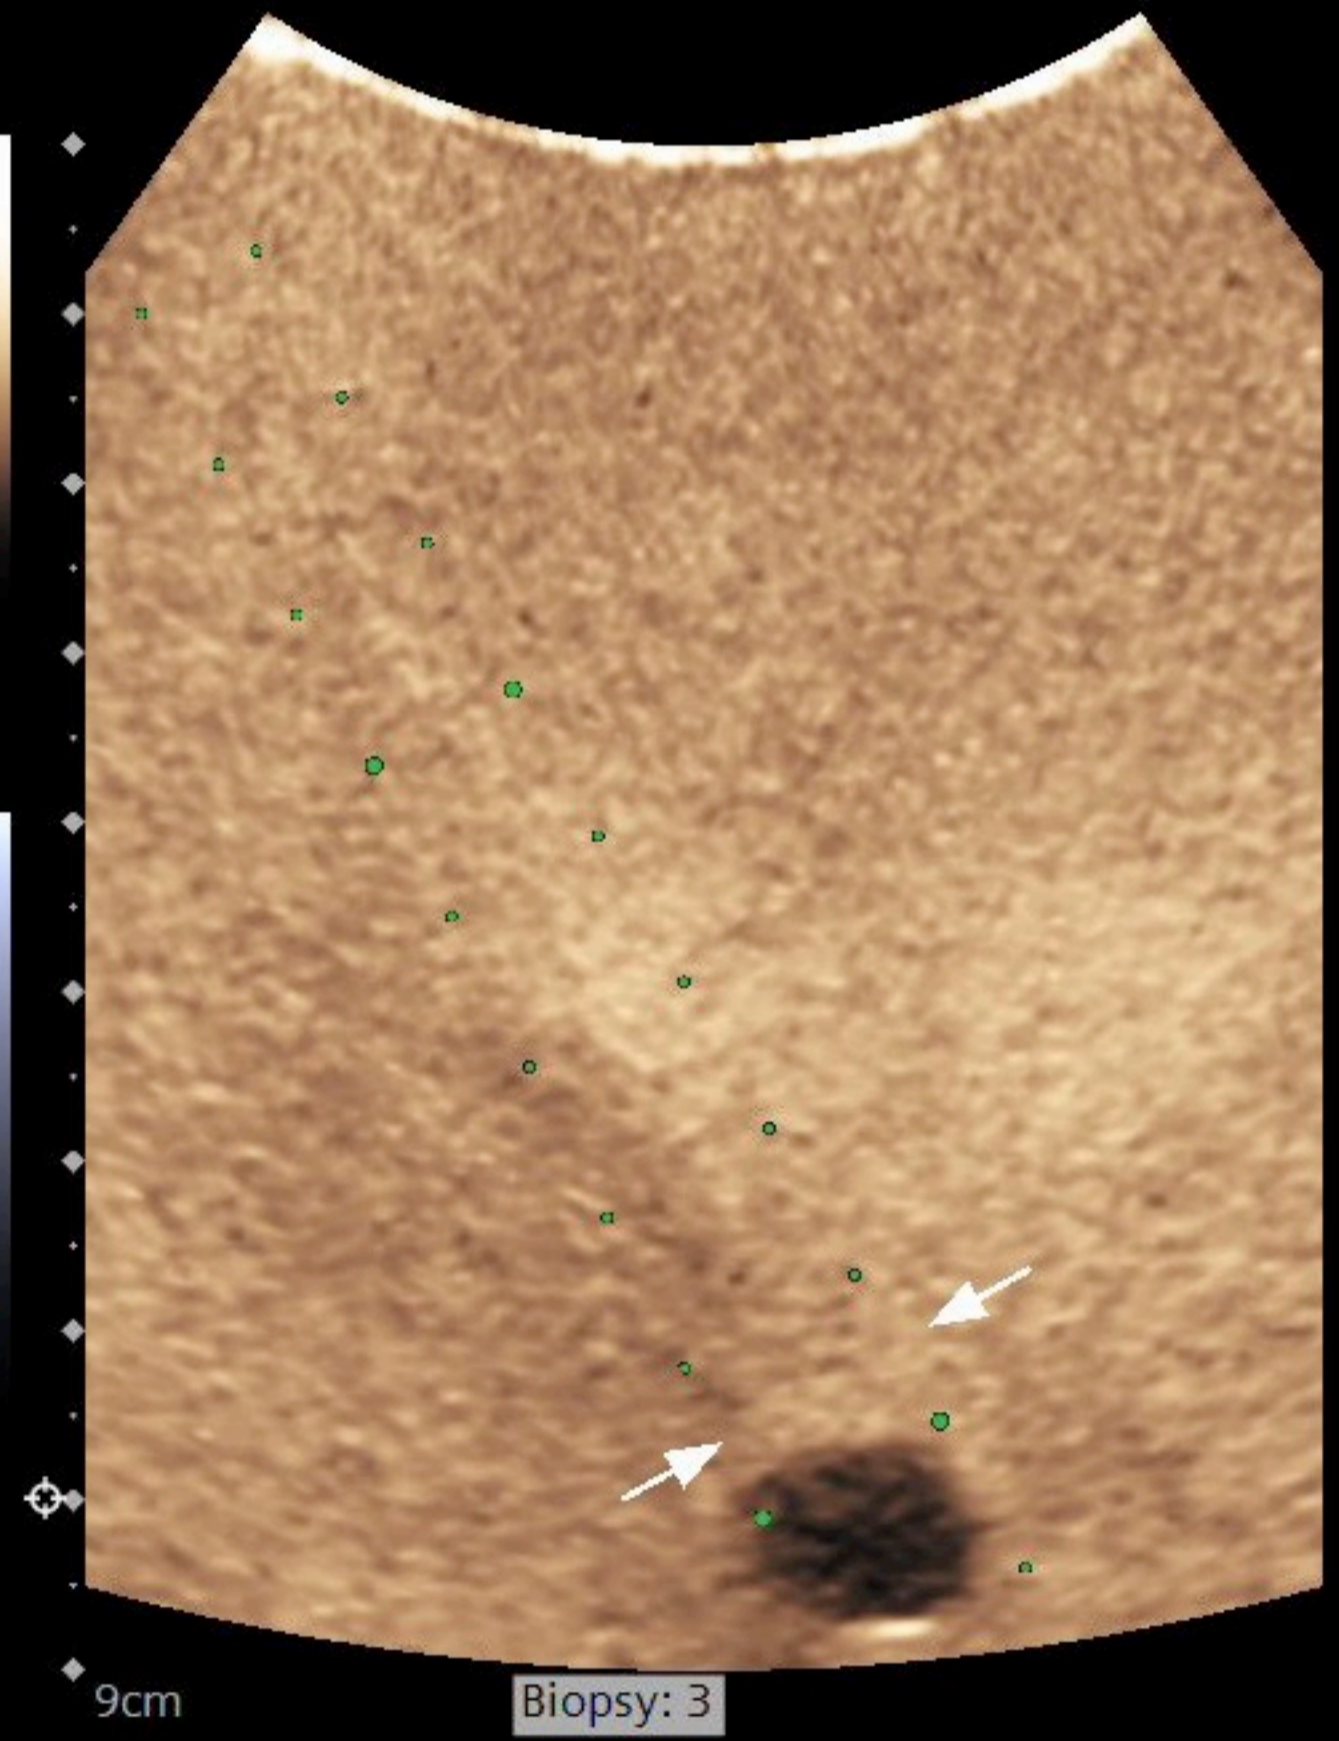

2nd puncture

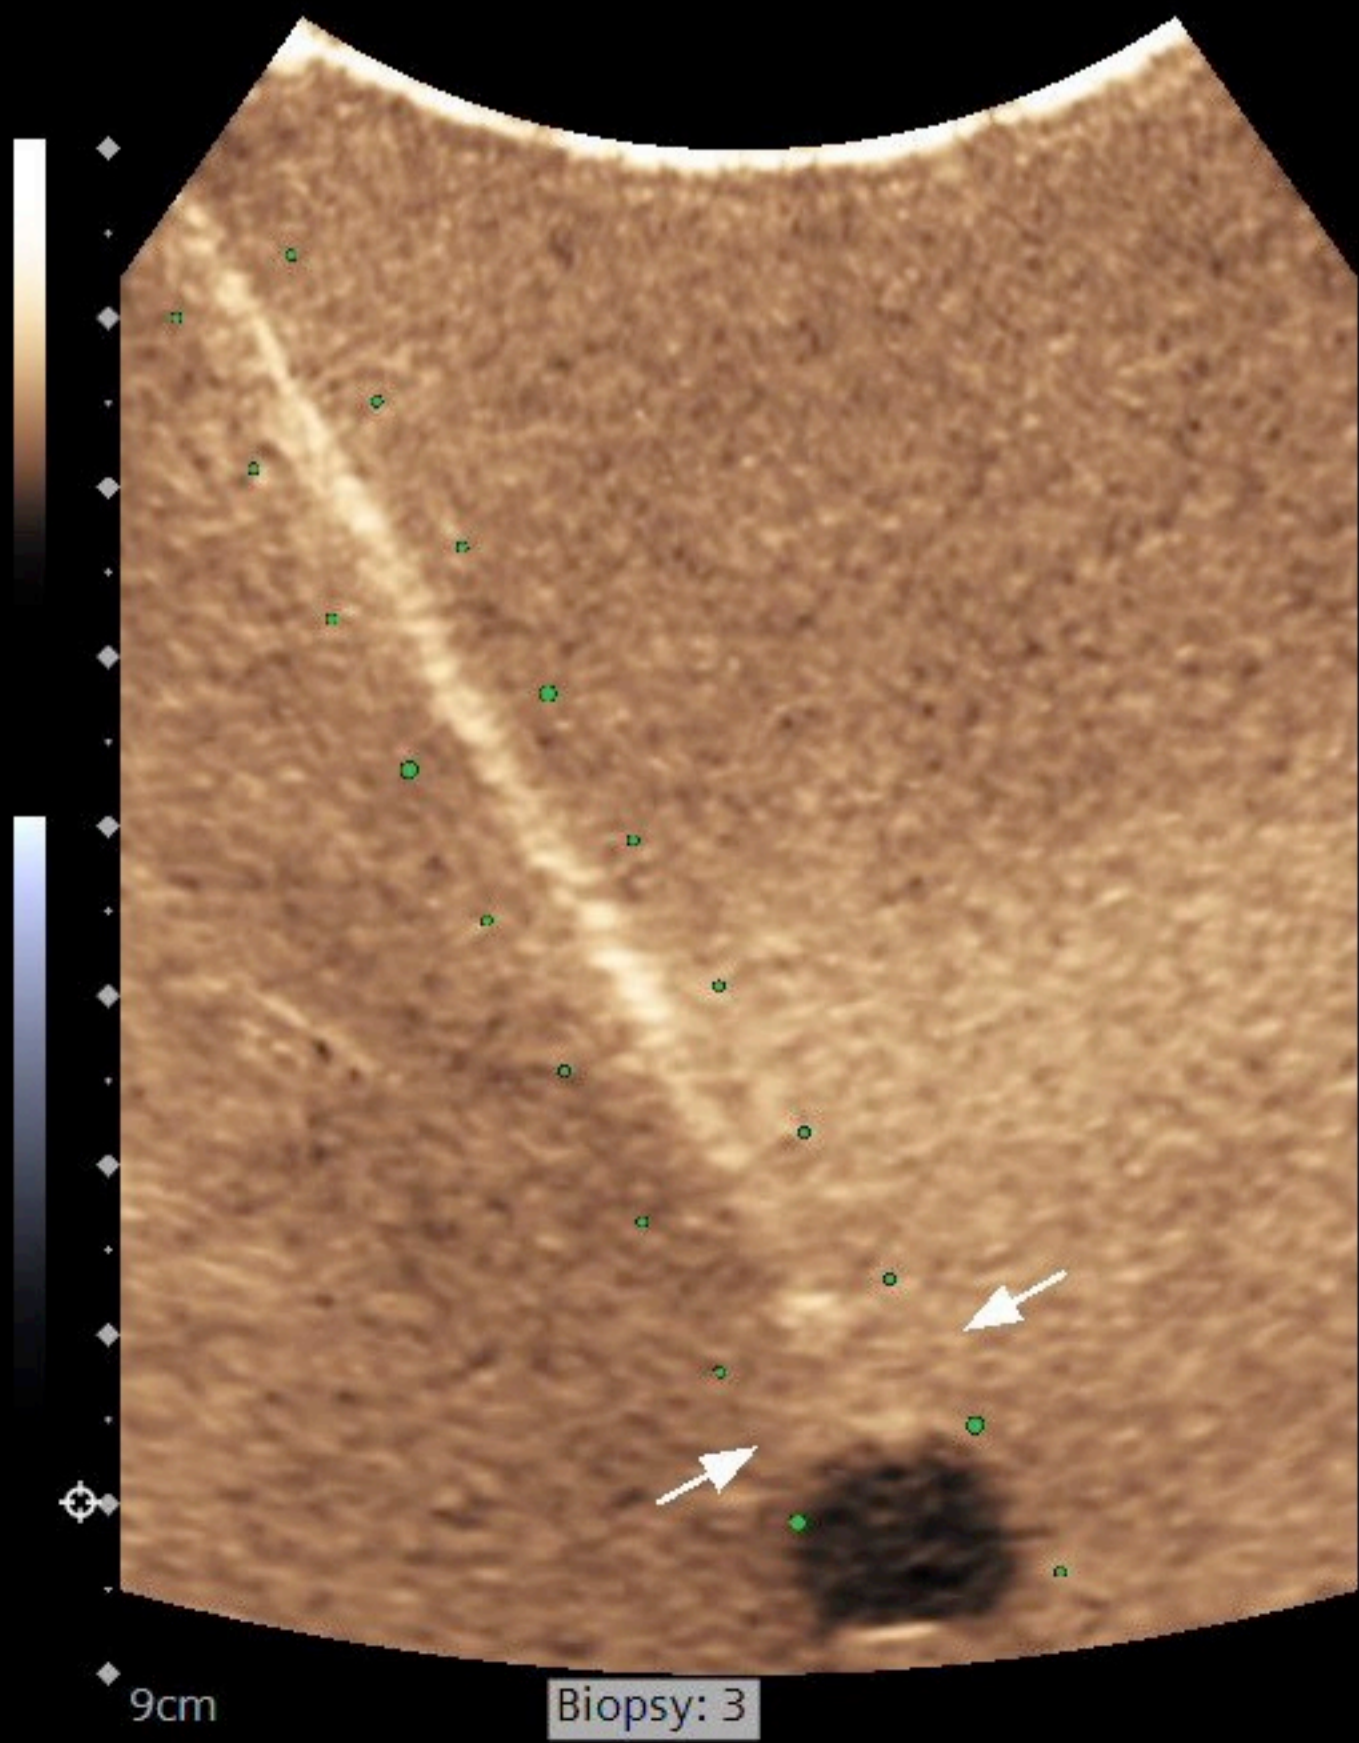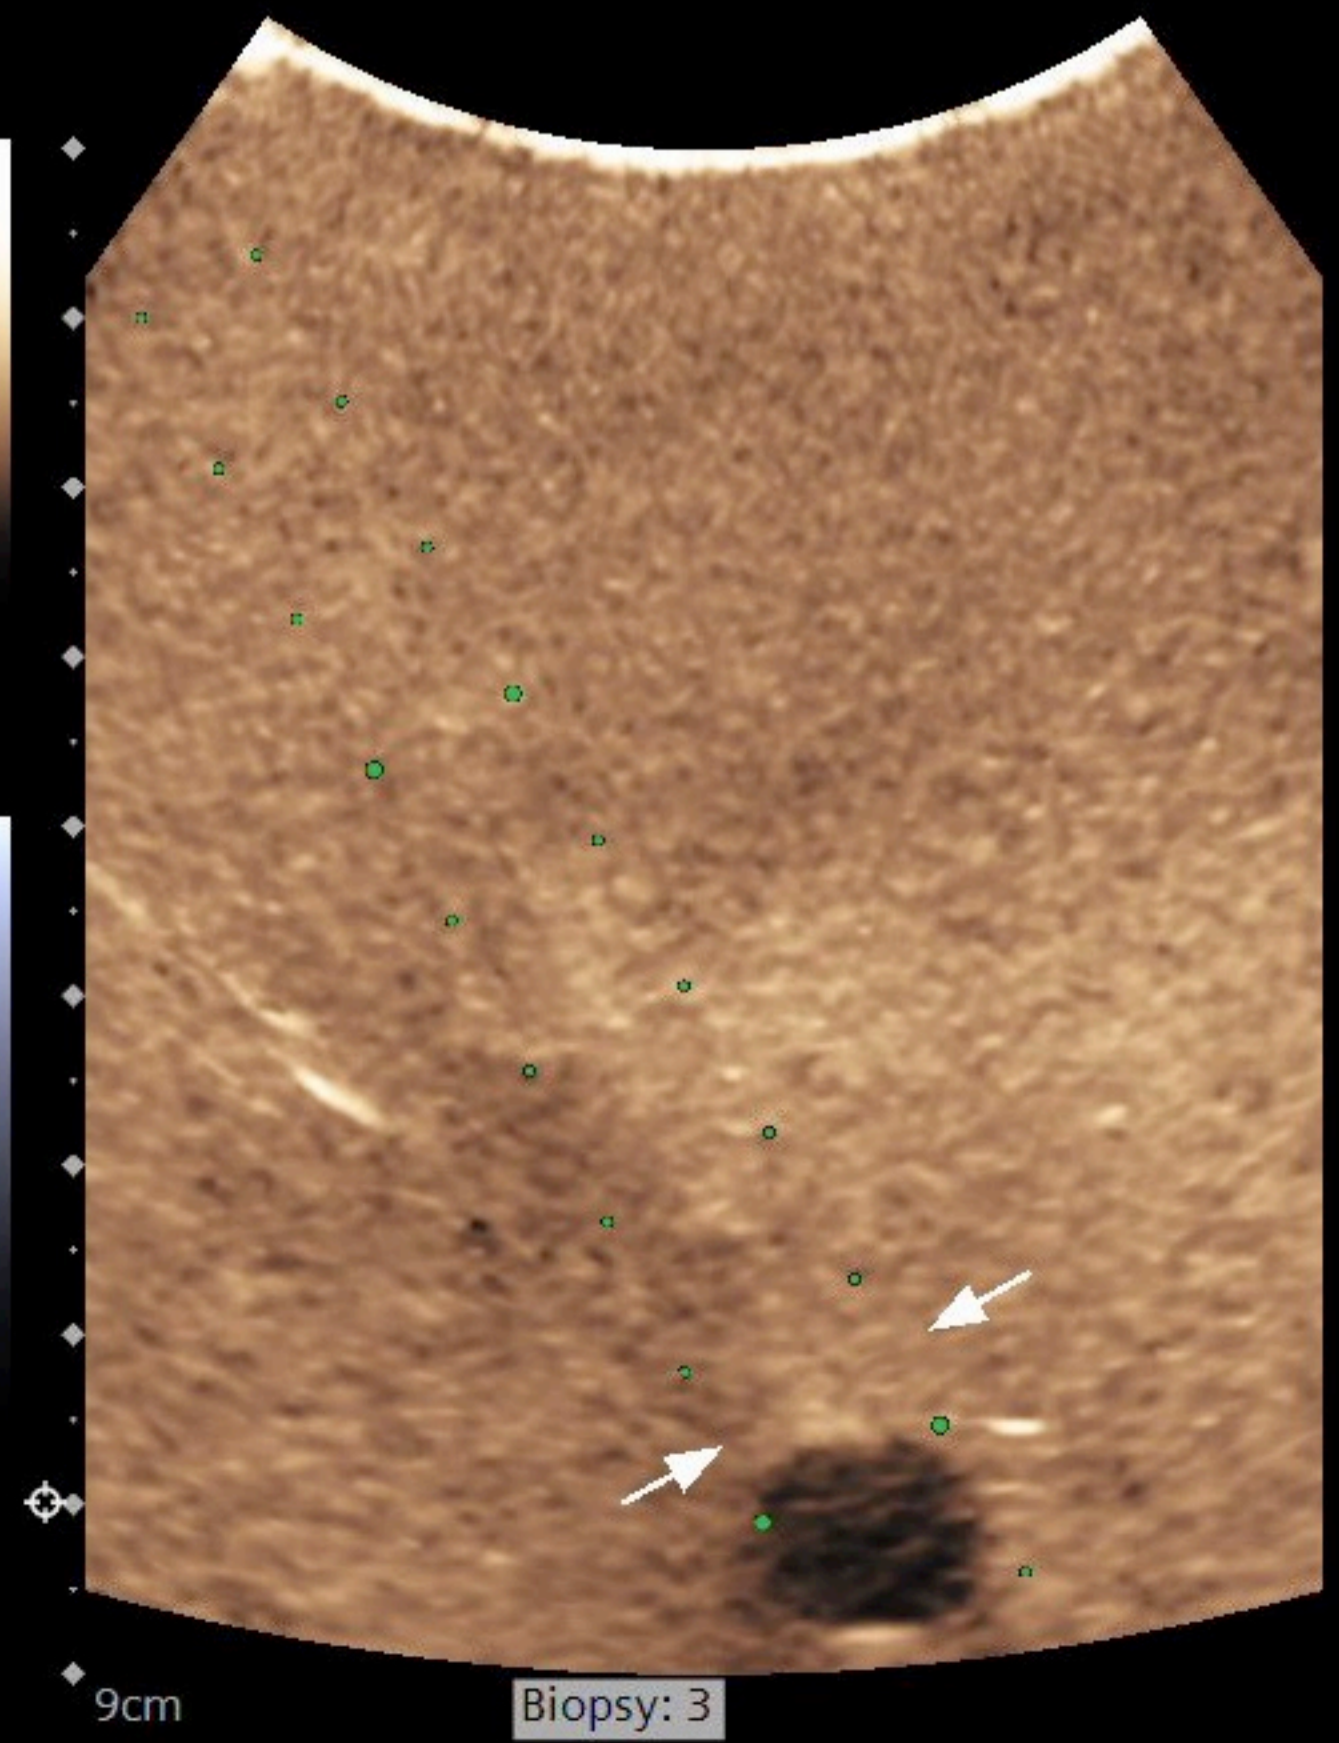

3rd puncture

Ultrasound contrast agent

Control



Full core biopsy needle (set 1/10)

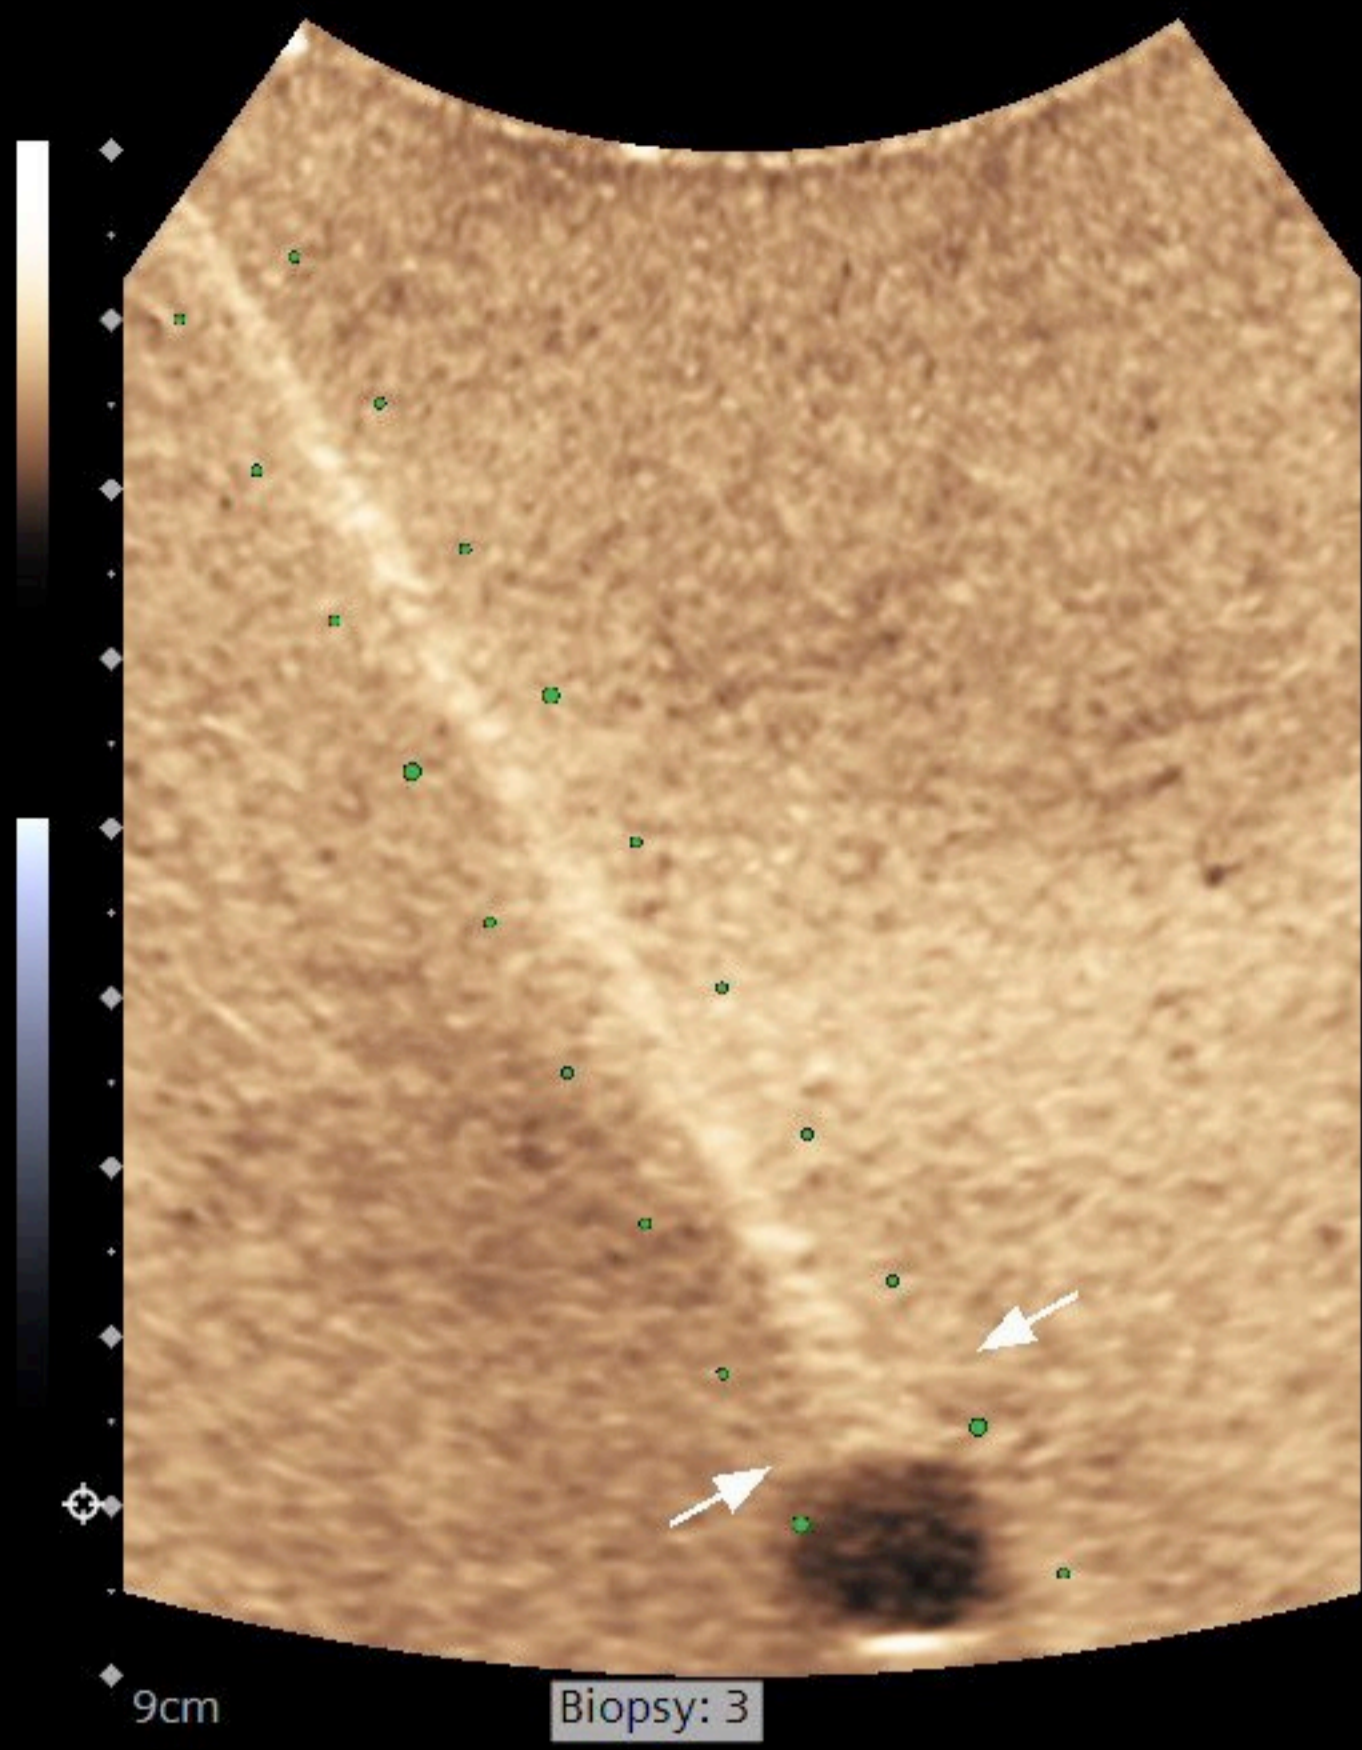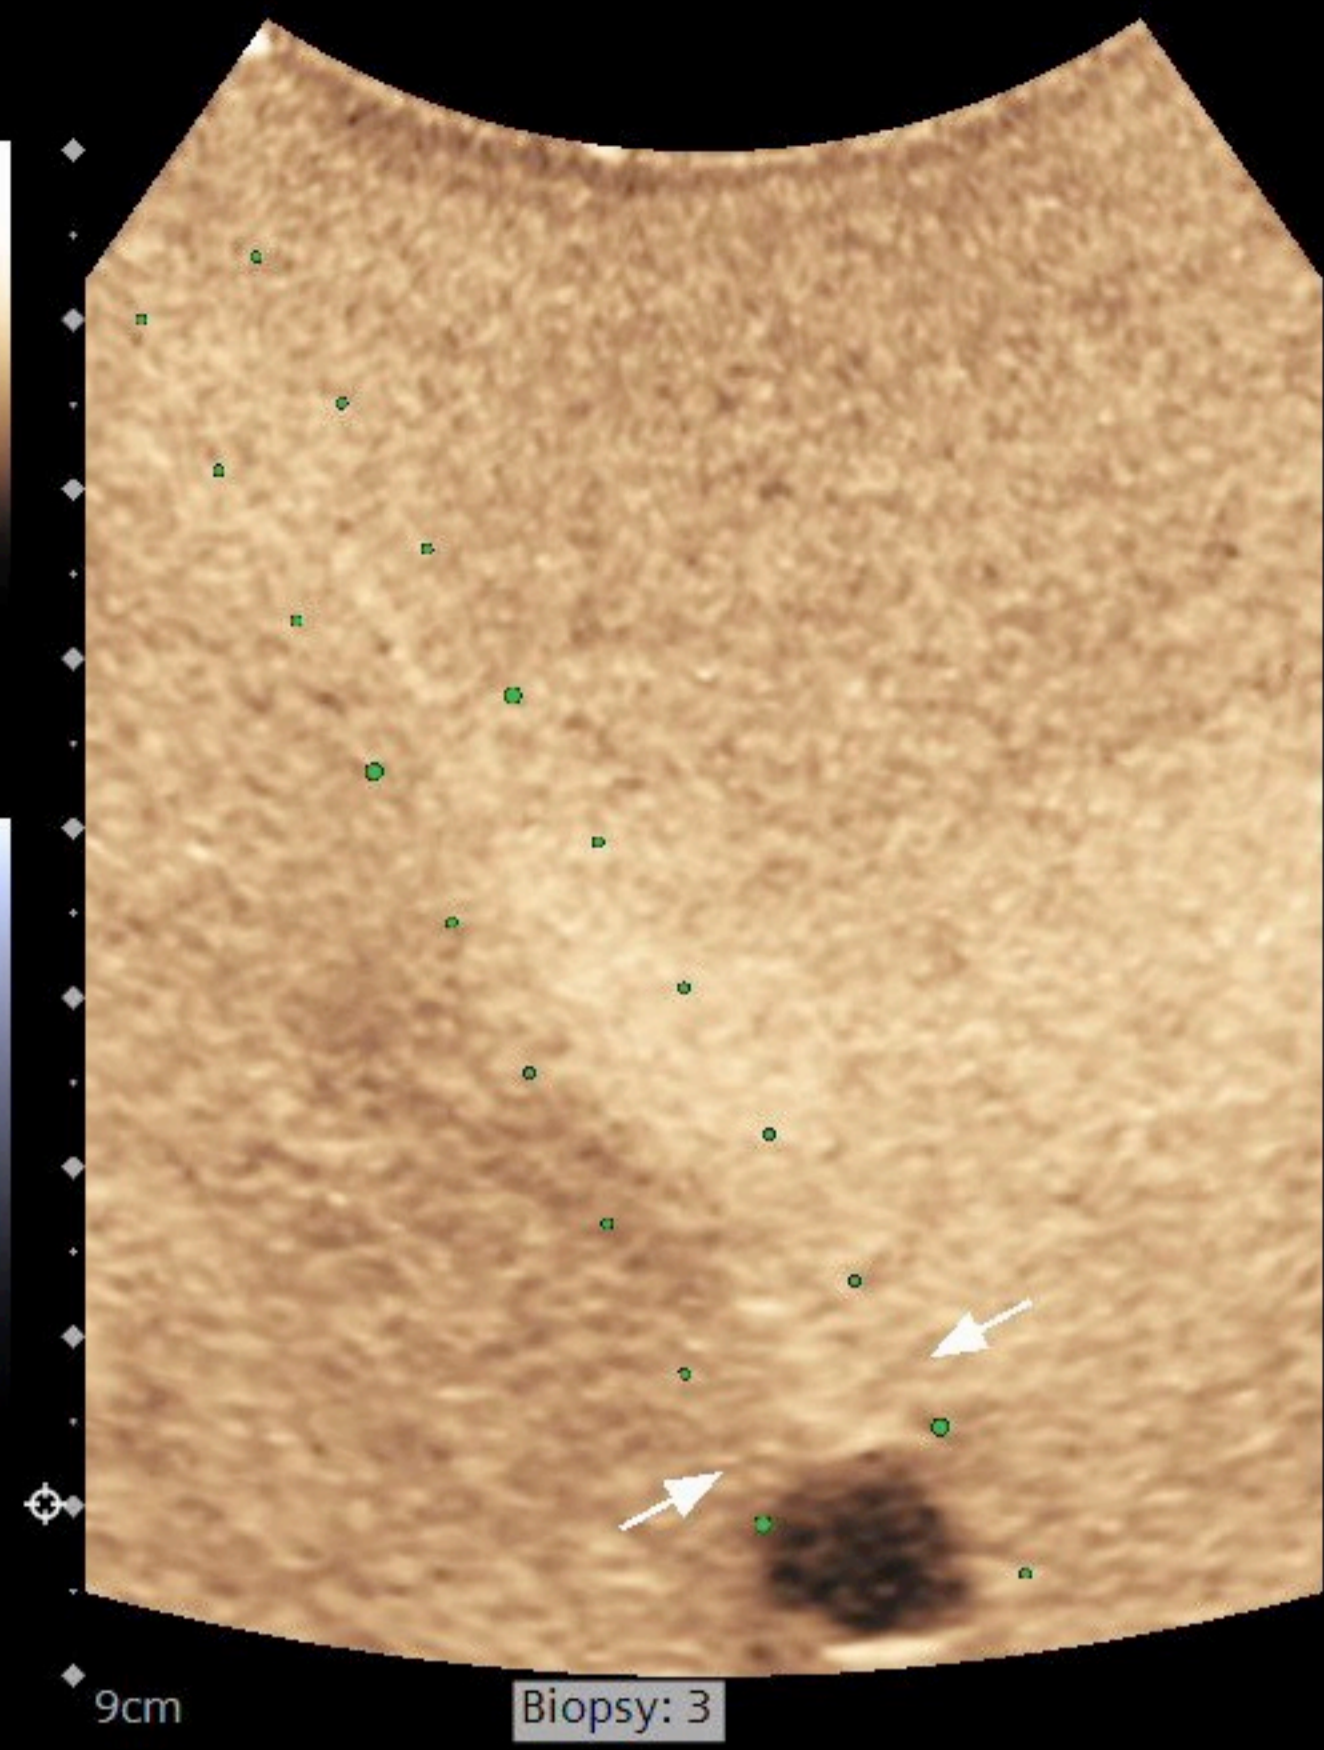

1st puncture

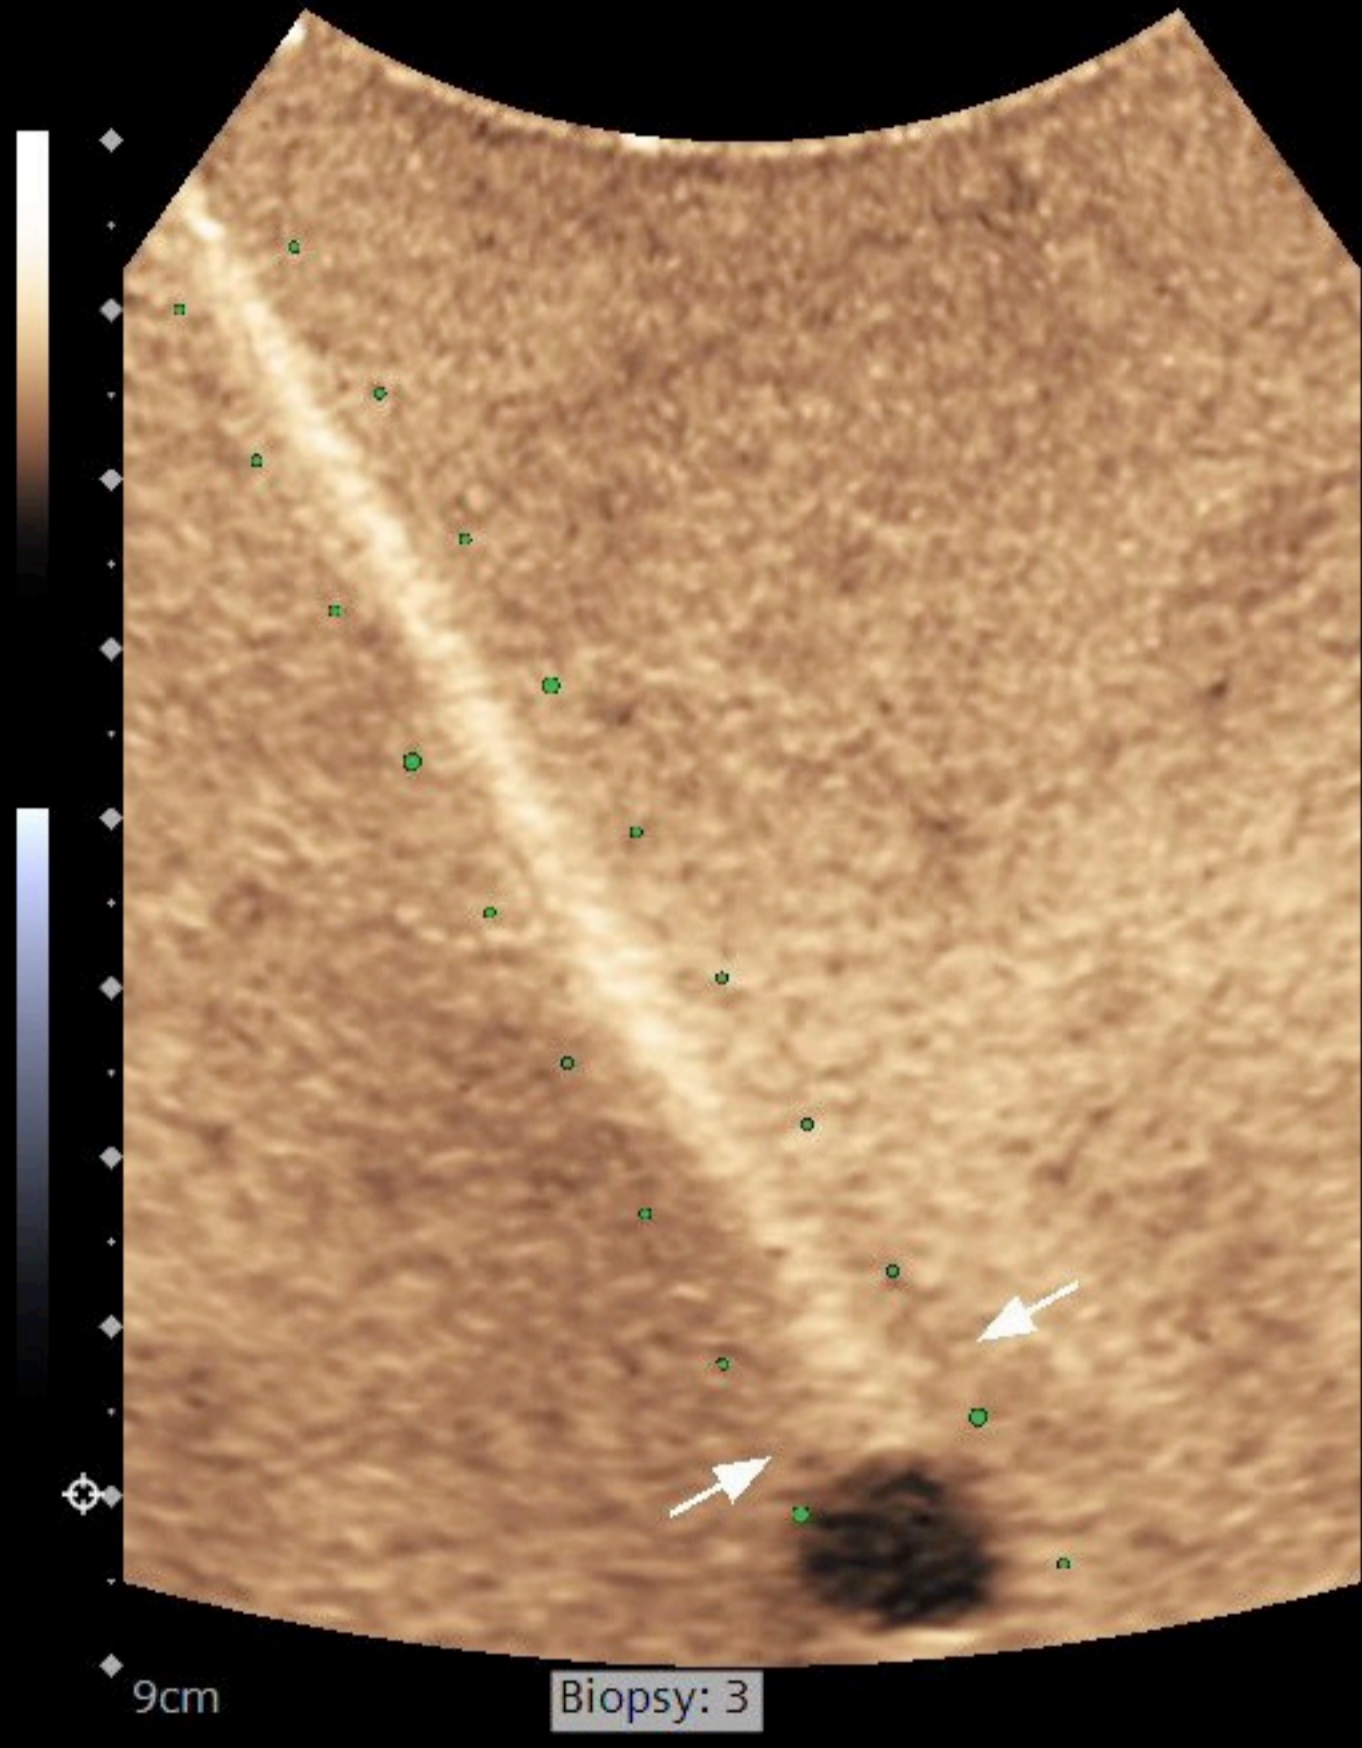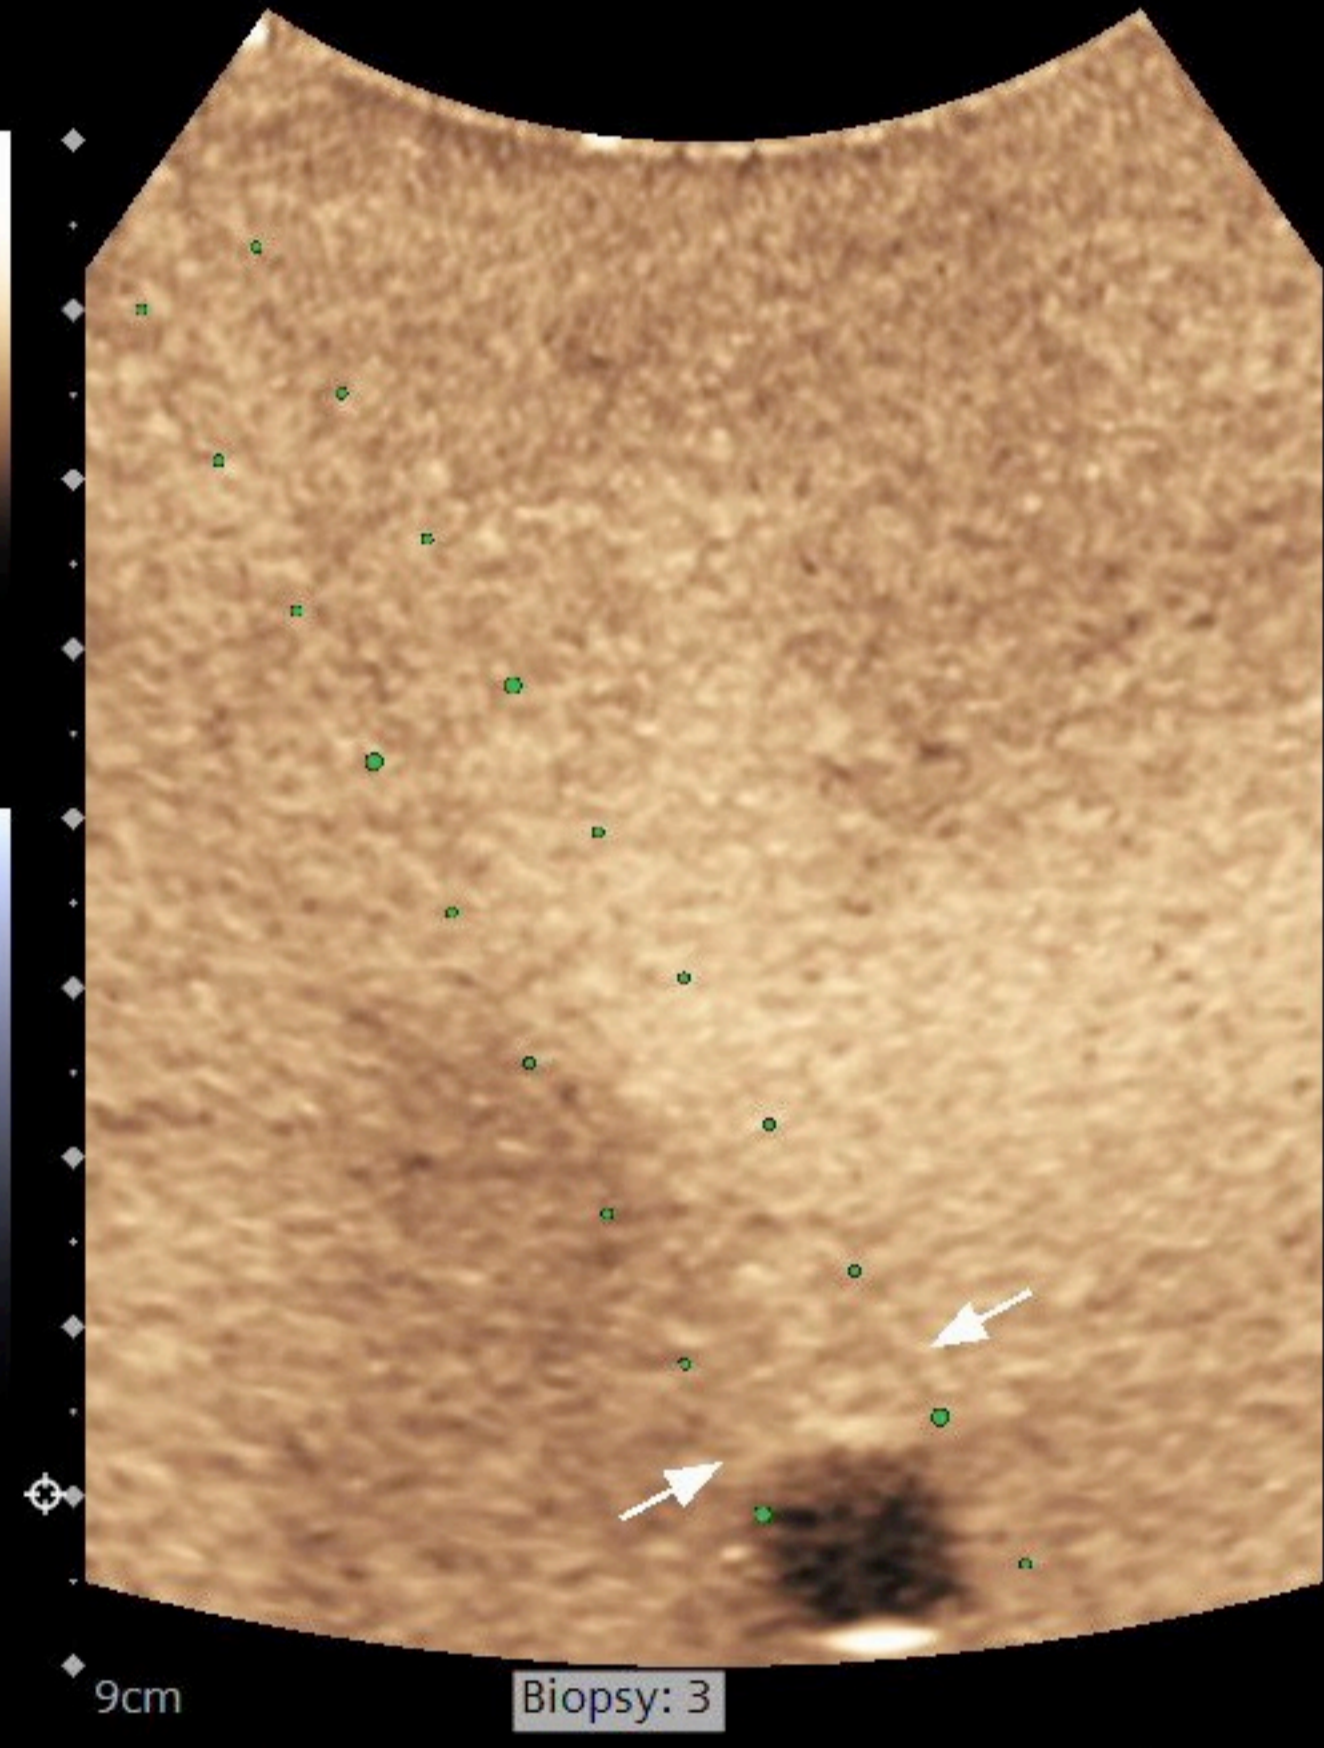

2nd puncture

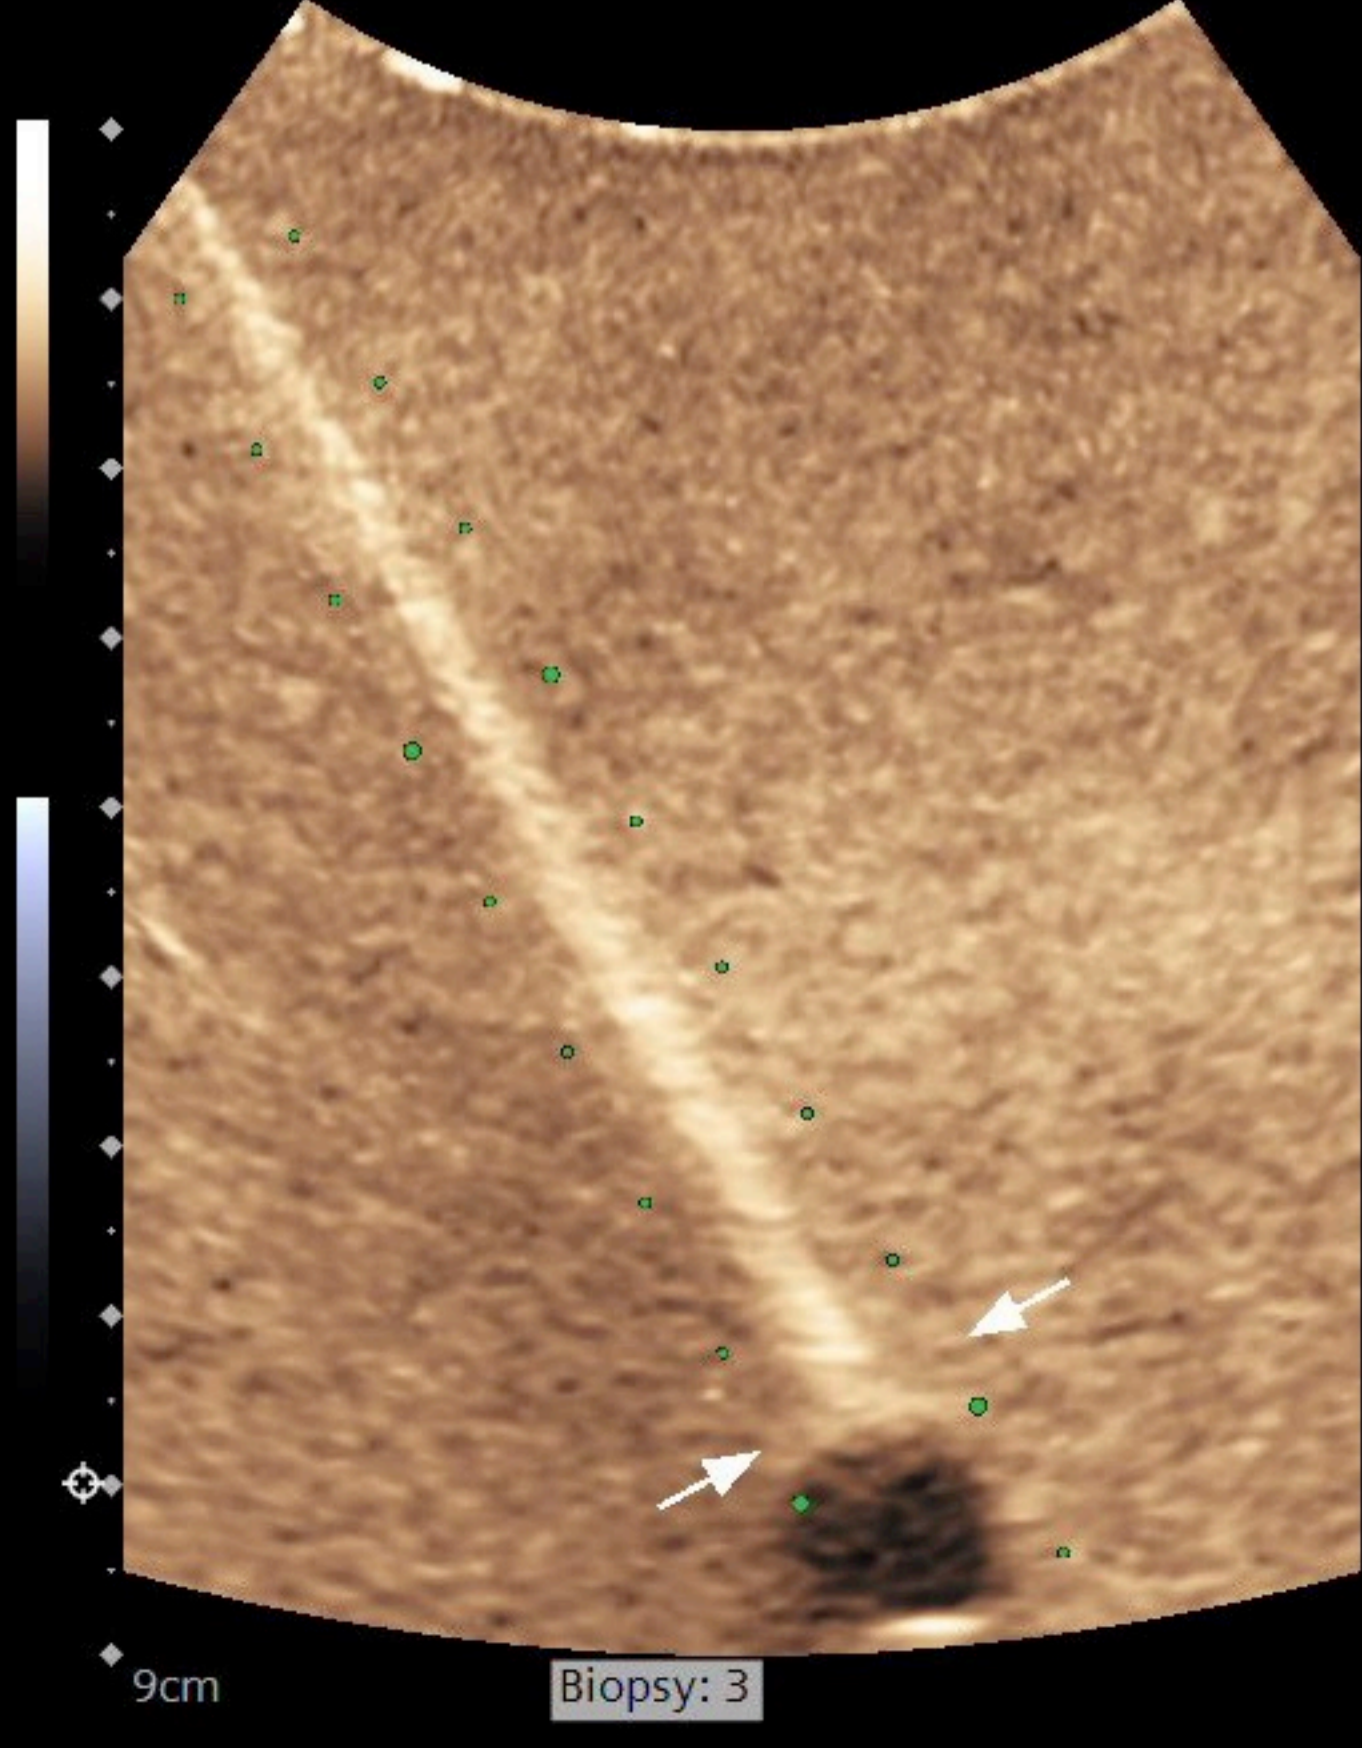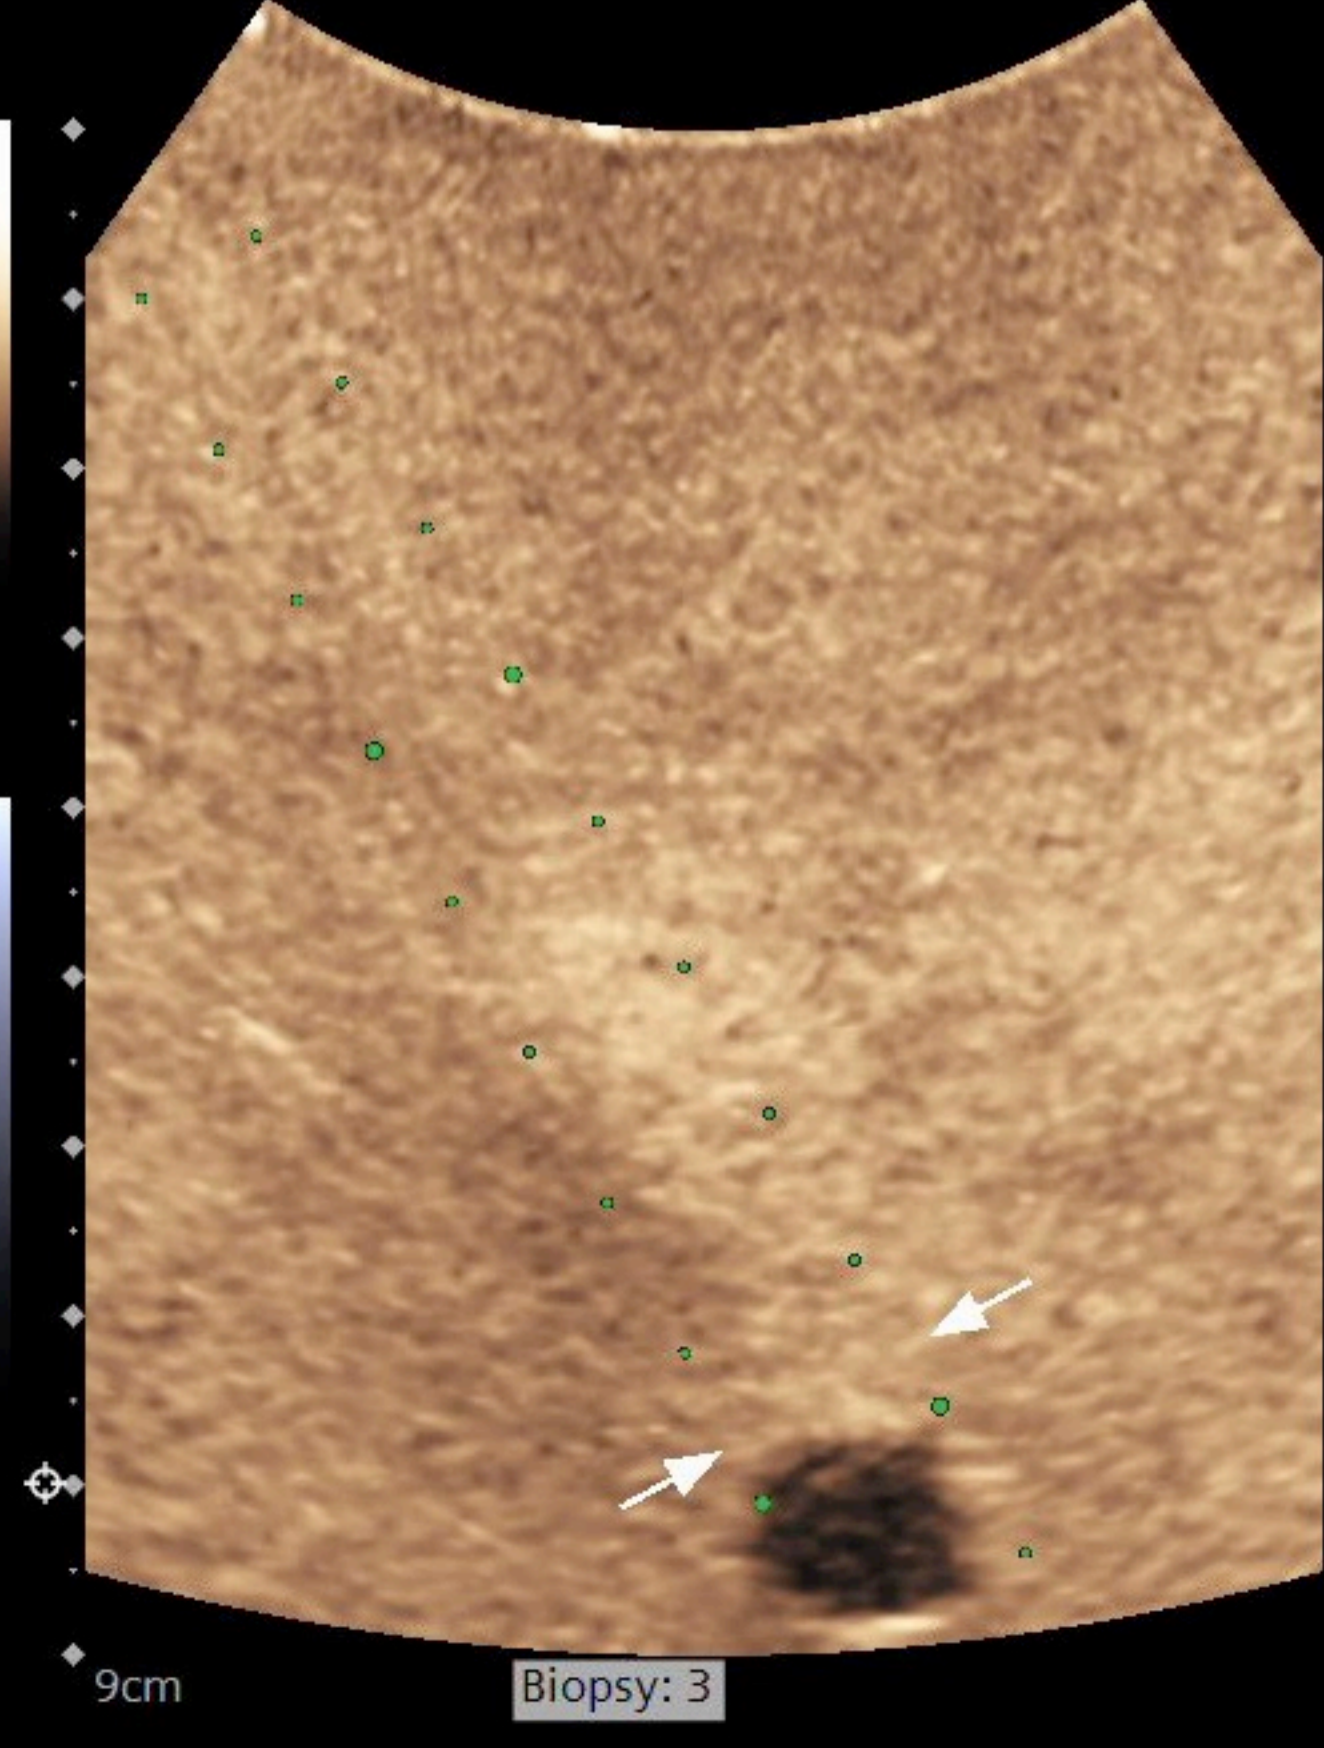

3rd puncture

Ultrasound contrast agent

Control



Full core biopsy needle (set 2/10)

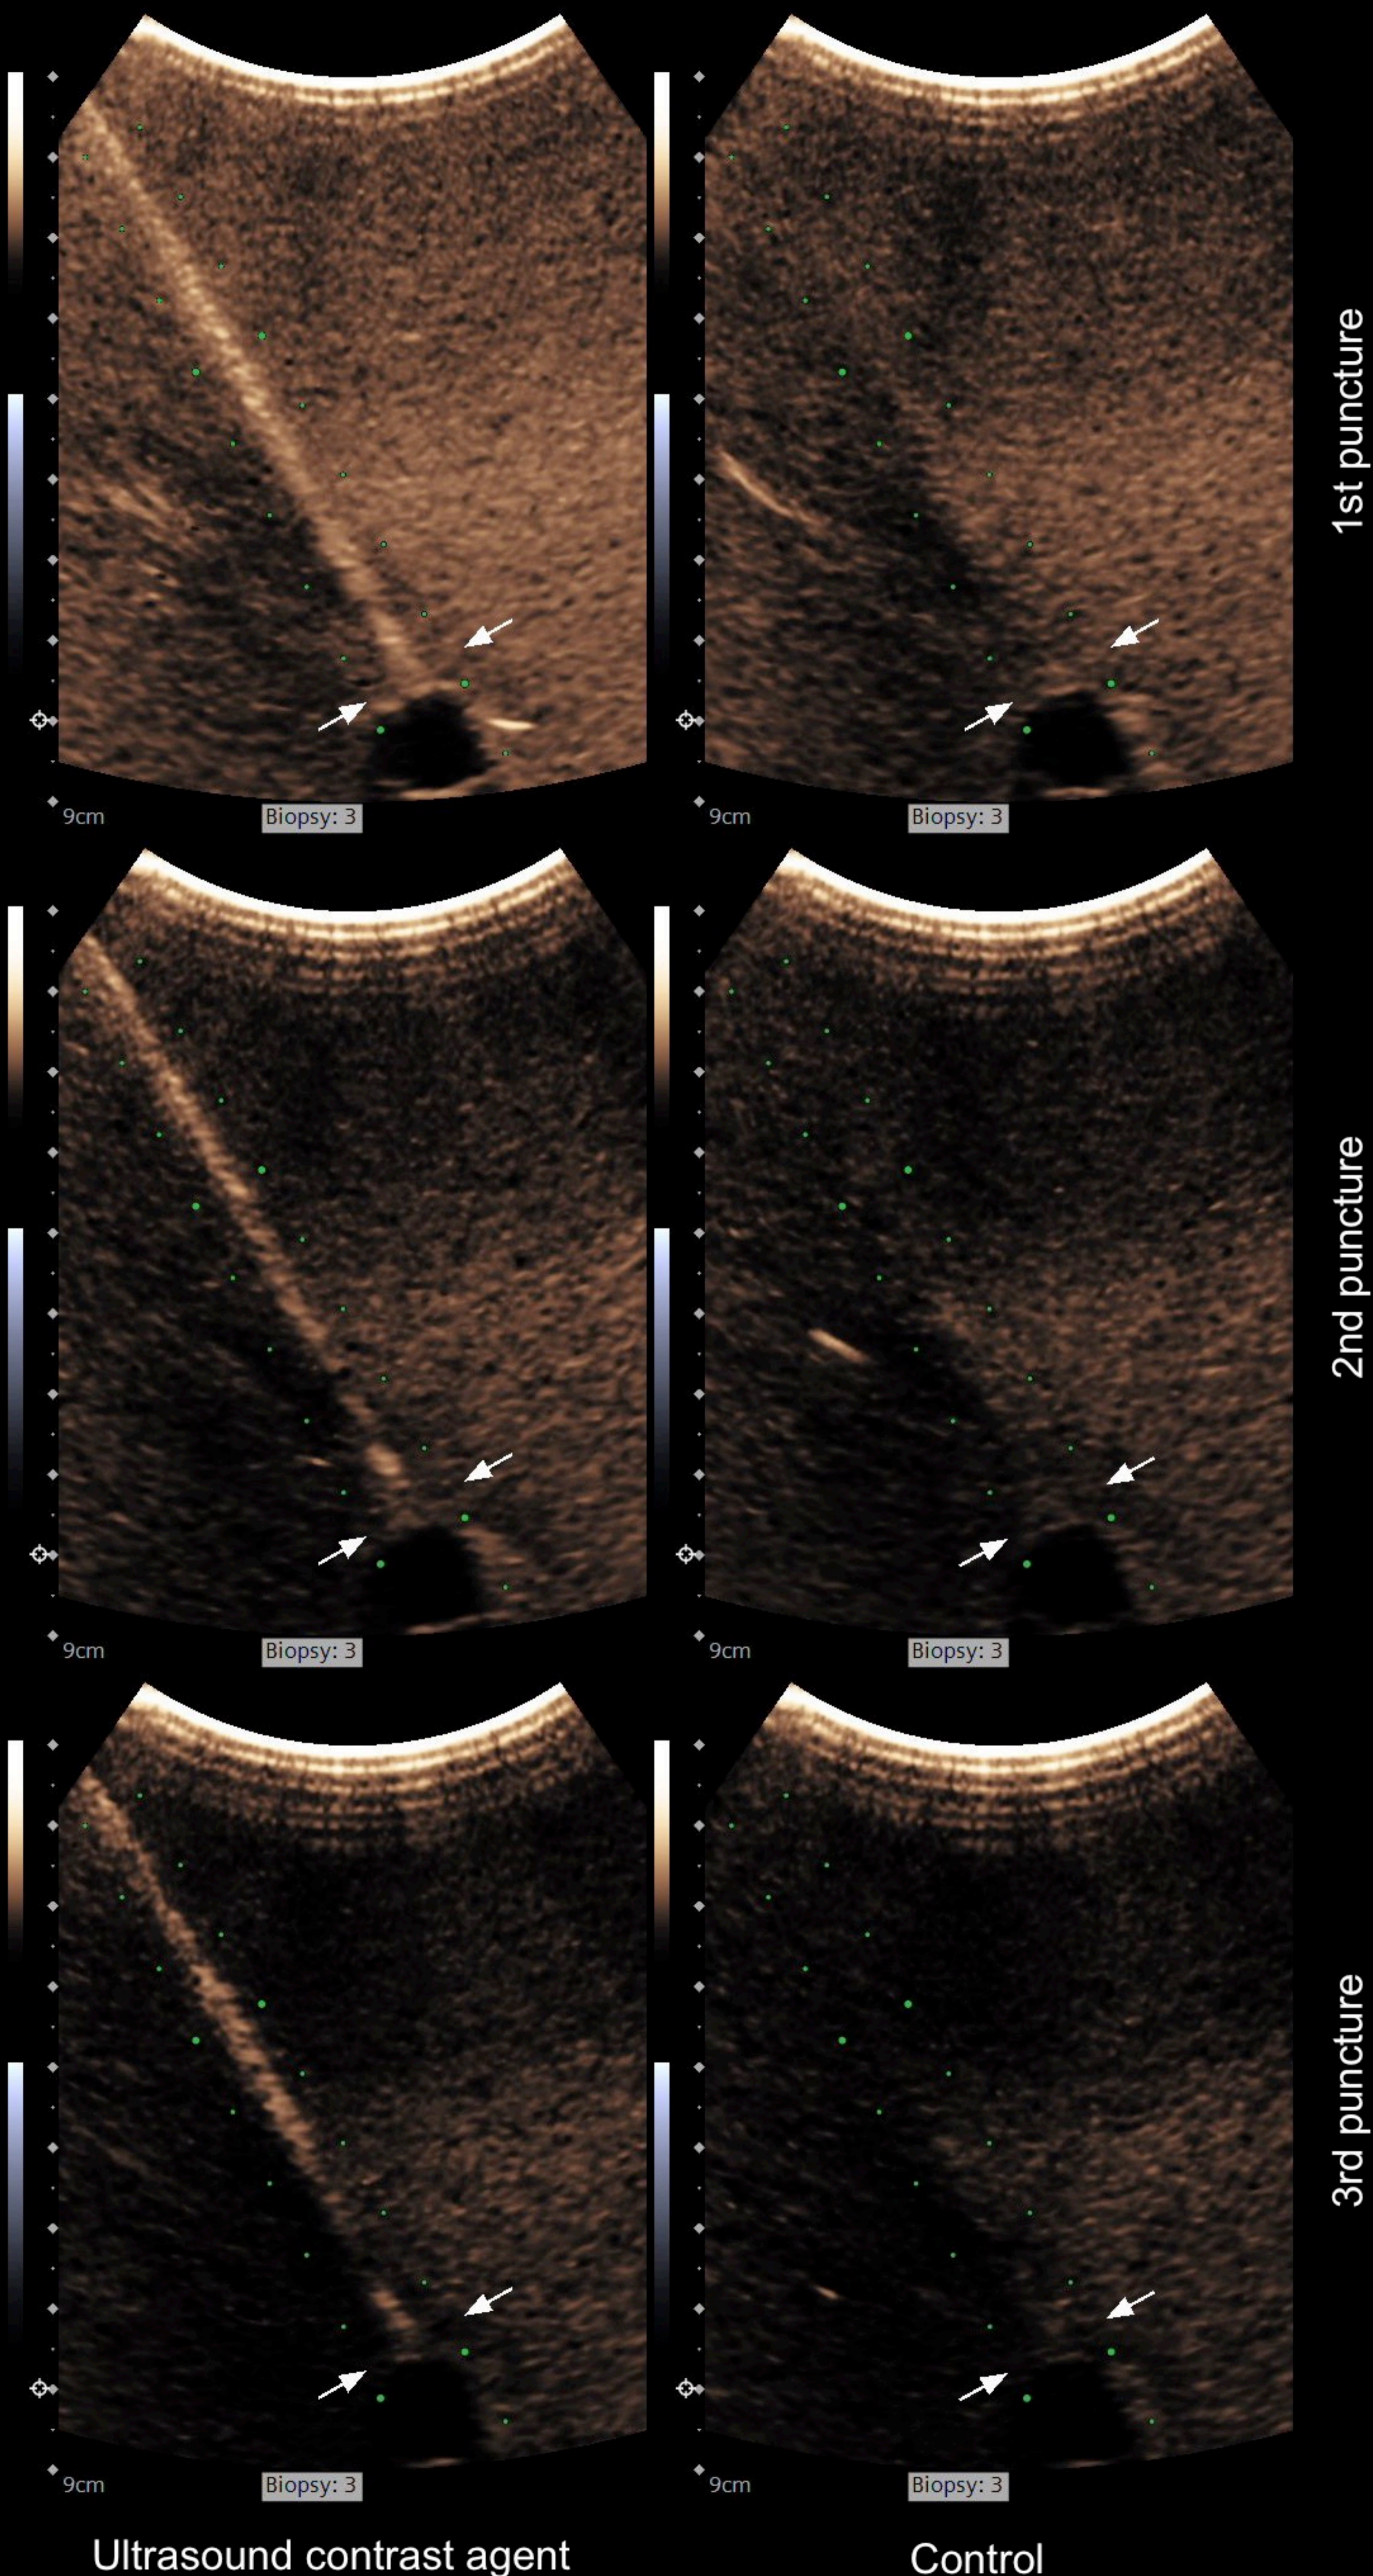

1st puncture

2nd puncture

3rd puncture

Ultrasound contrast agent

Control



Full core biopsy needle (set 3/10)

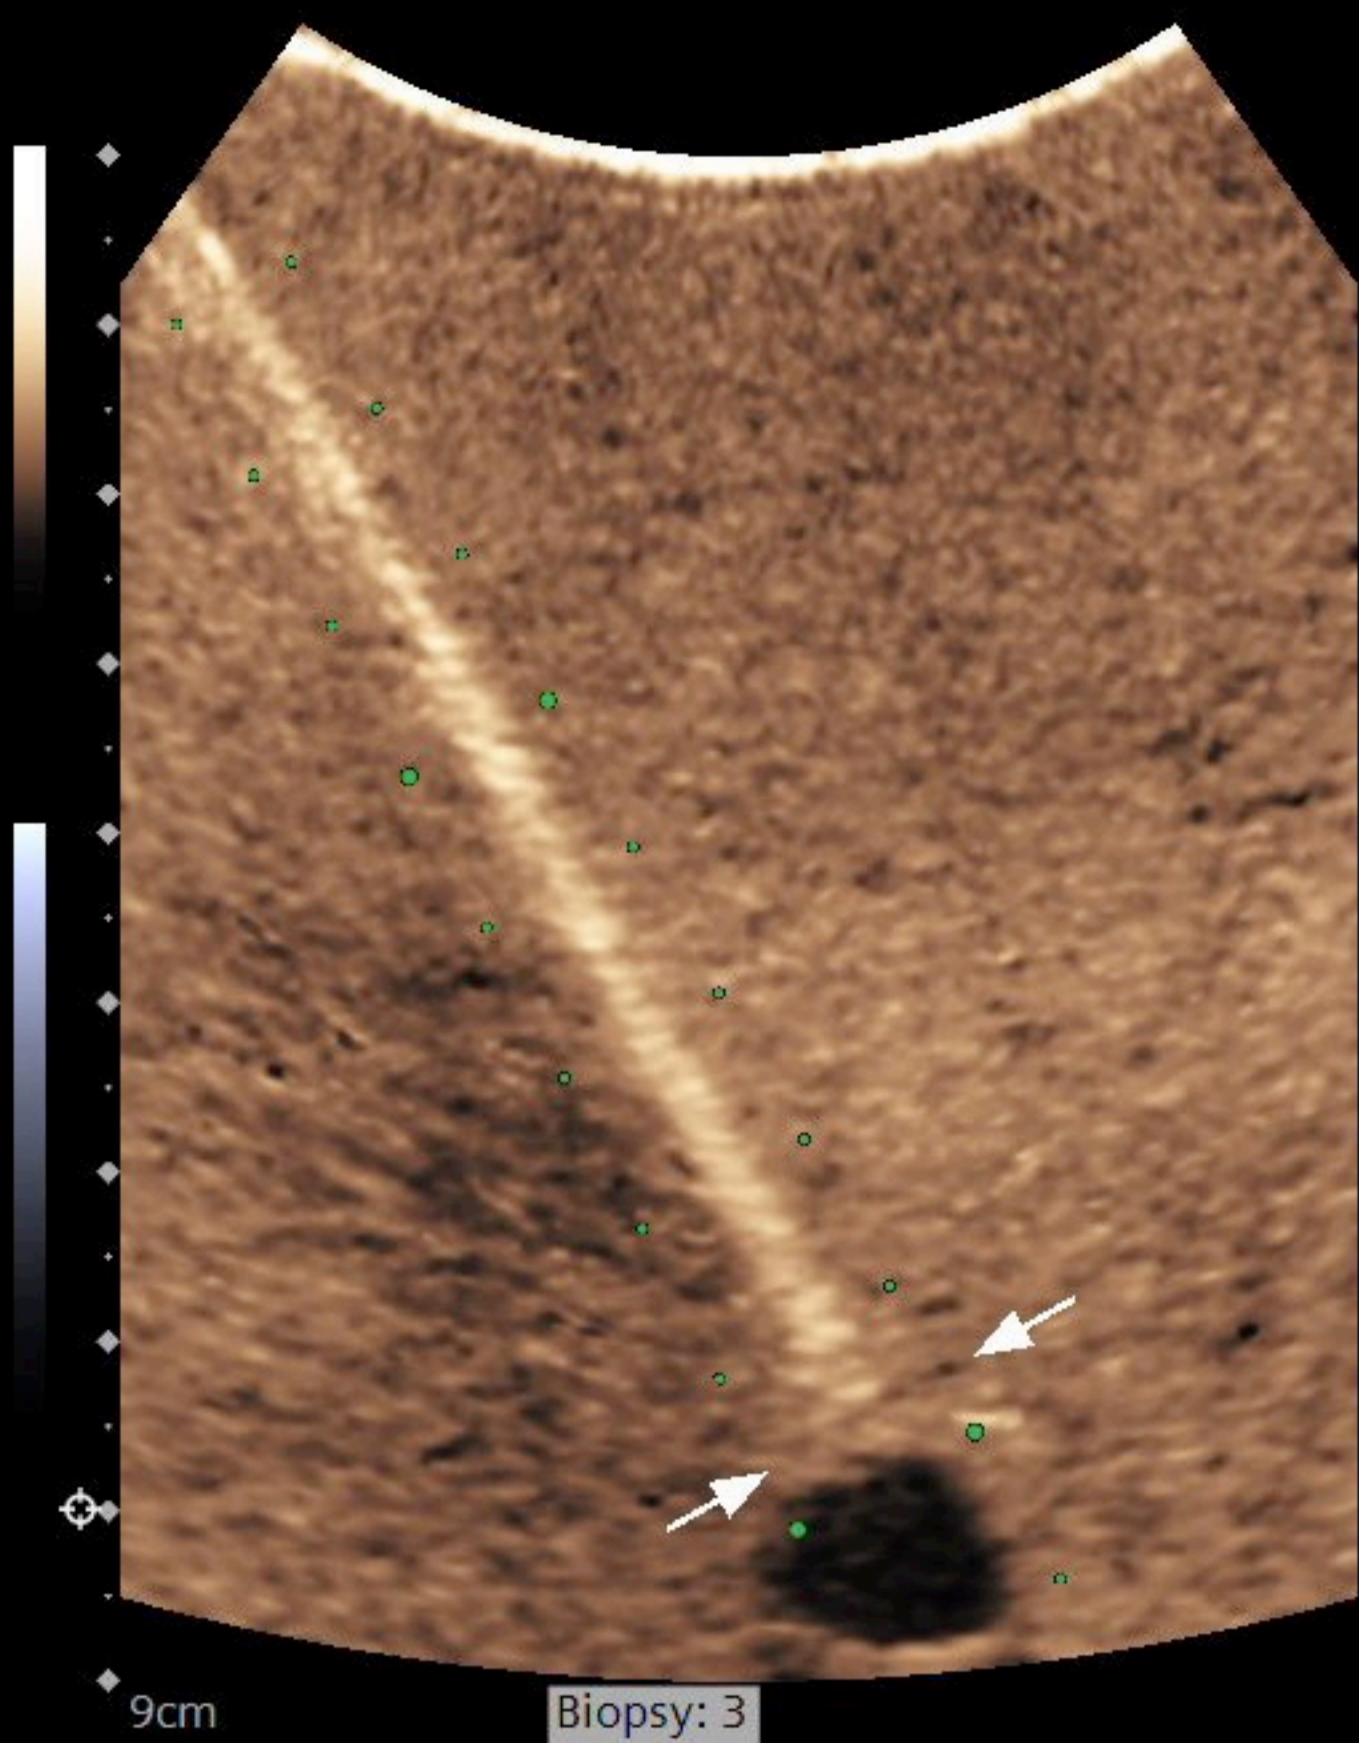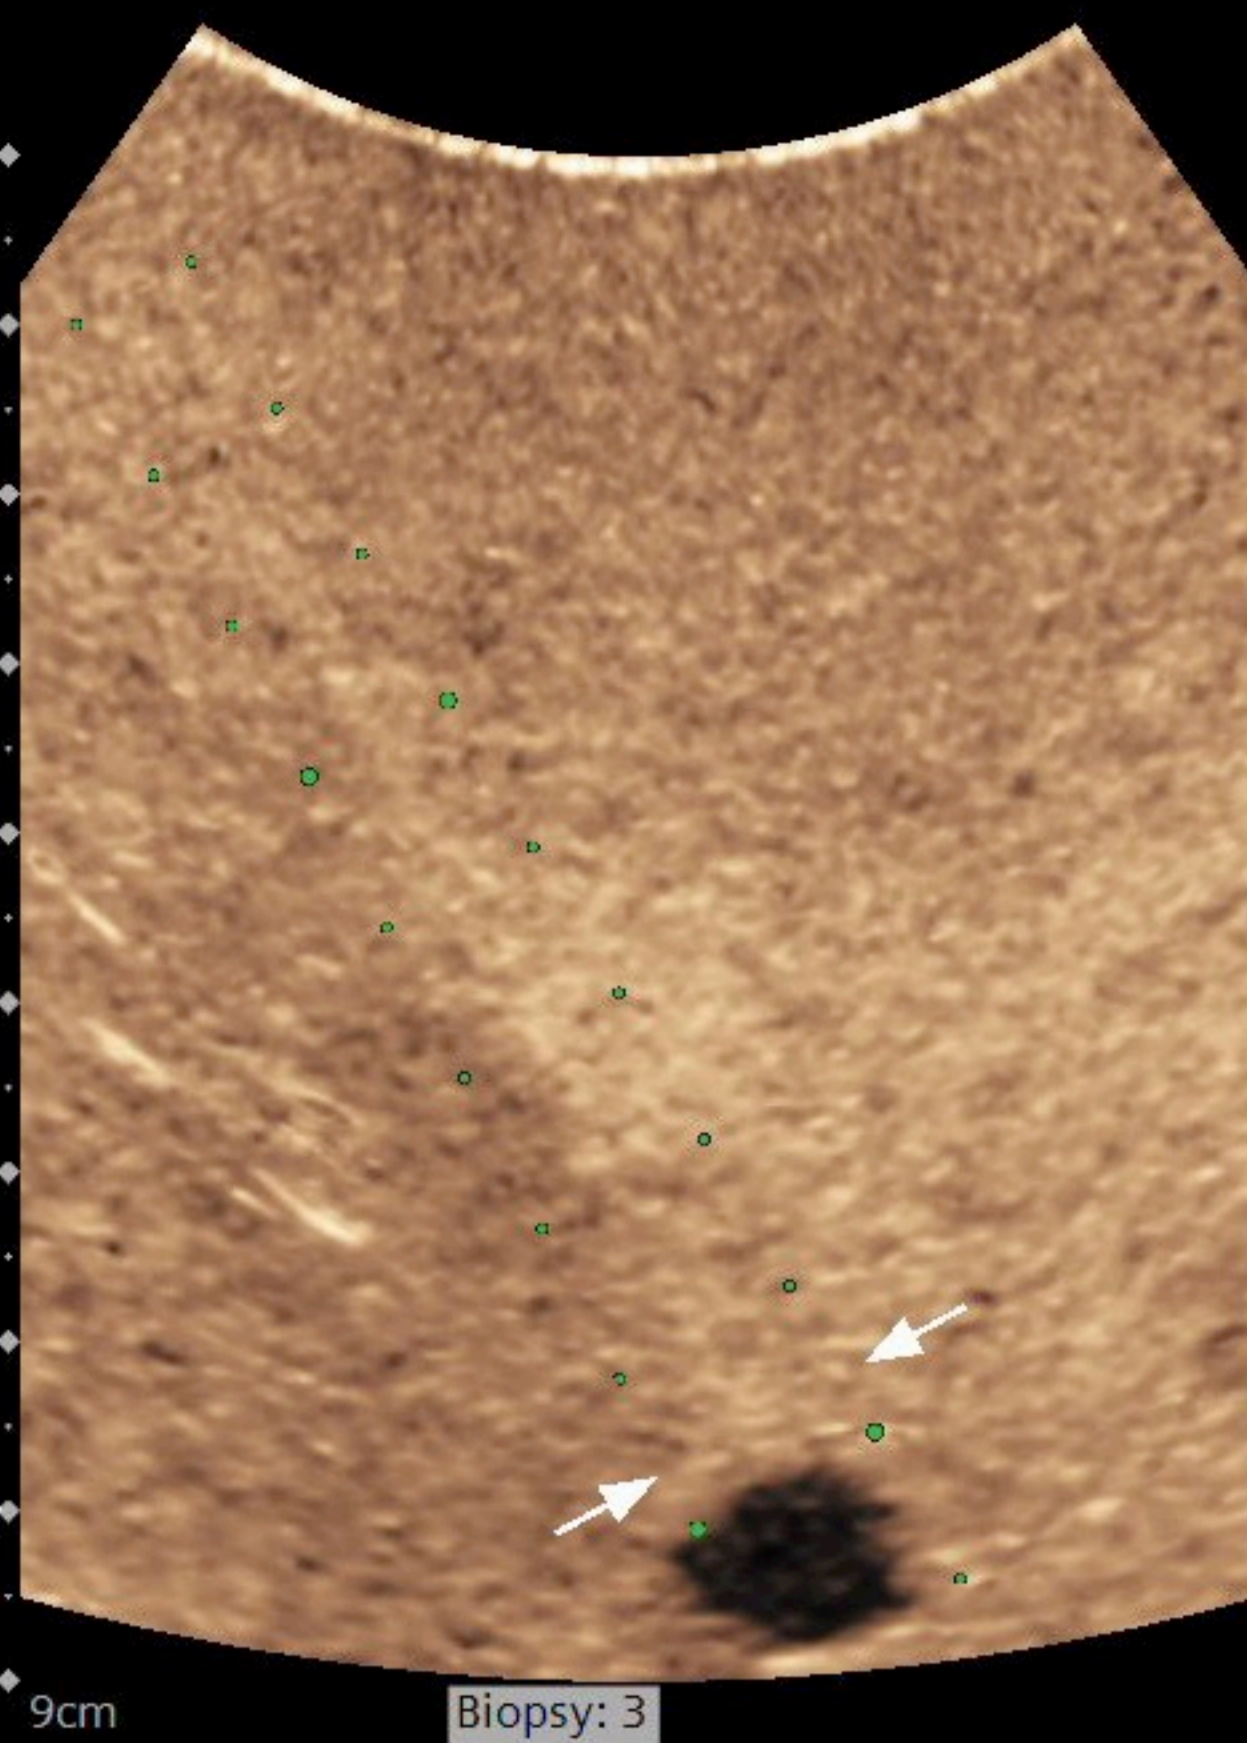

1st puncture

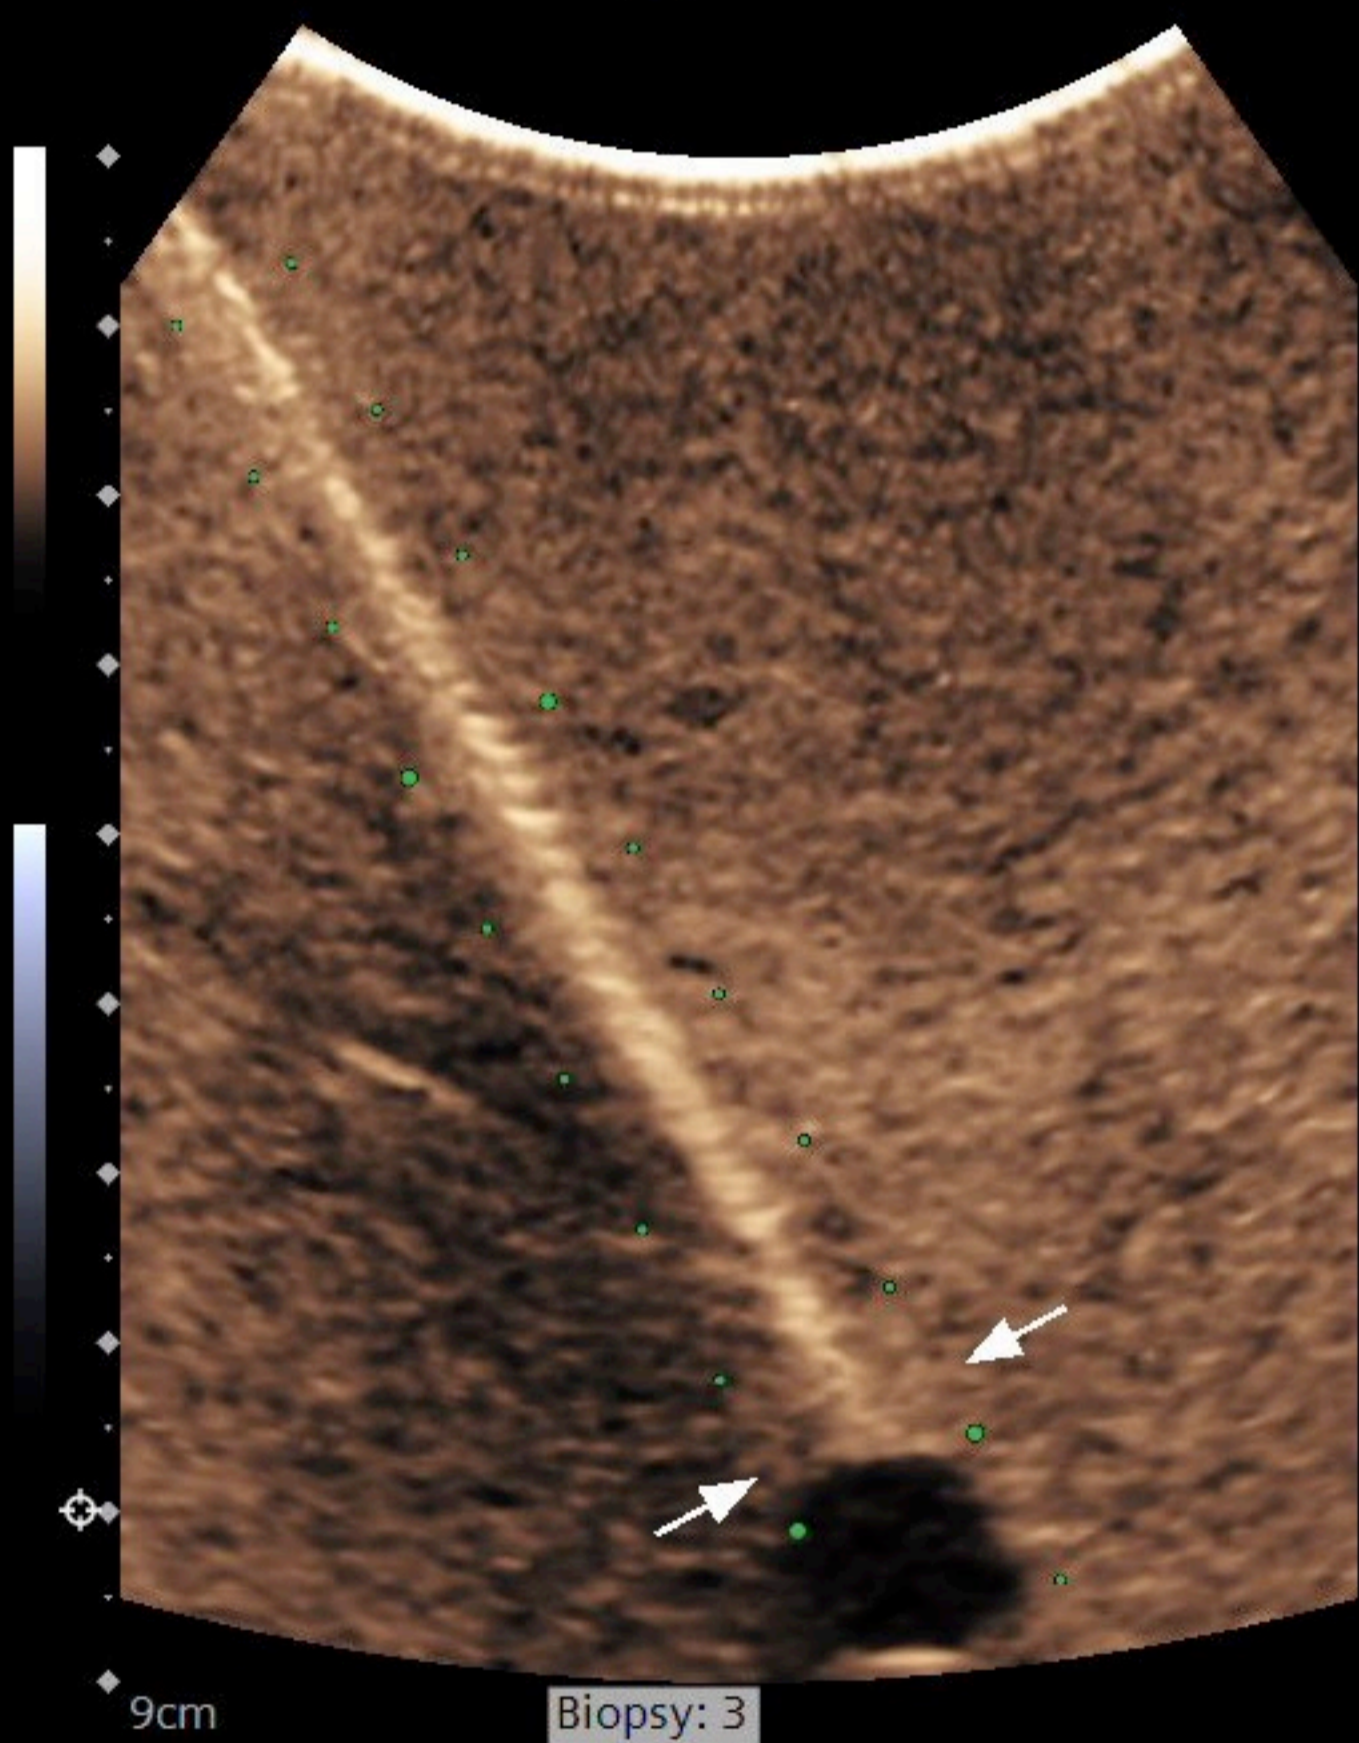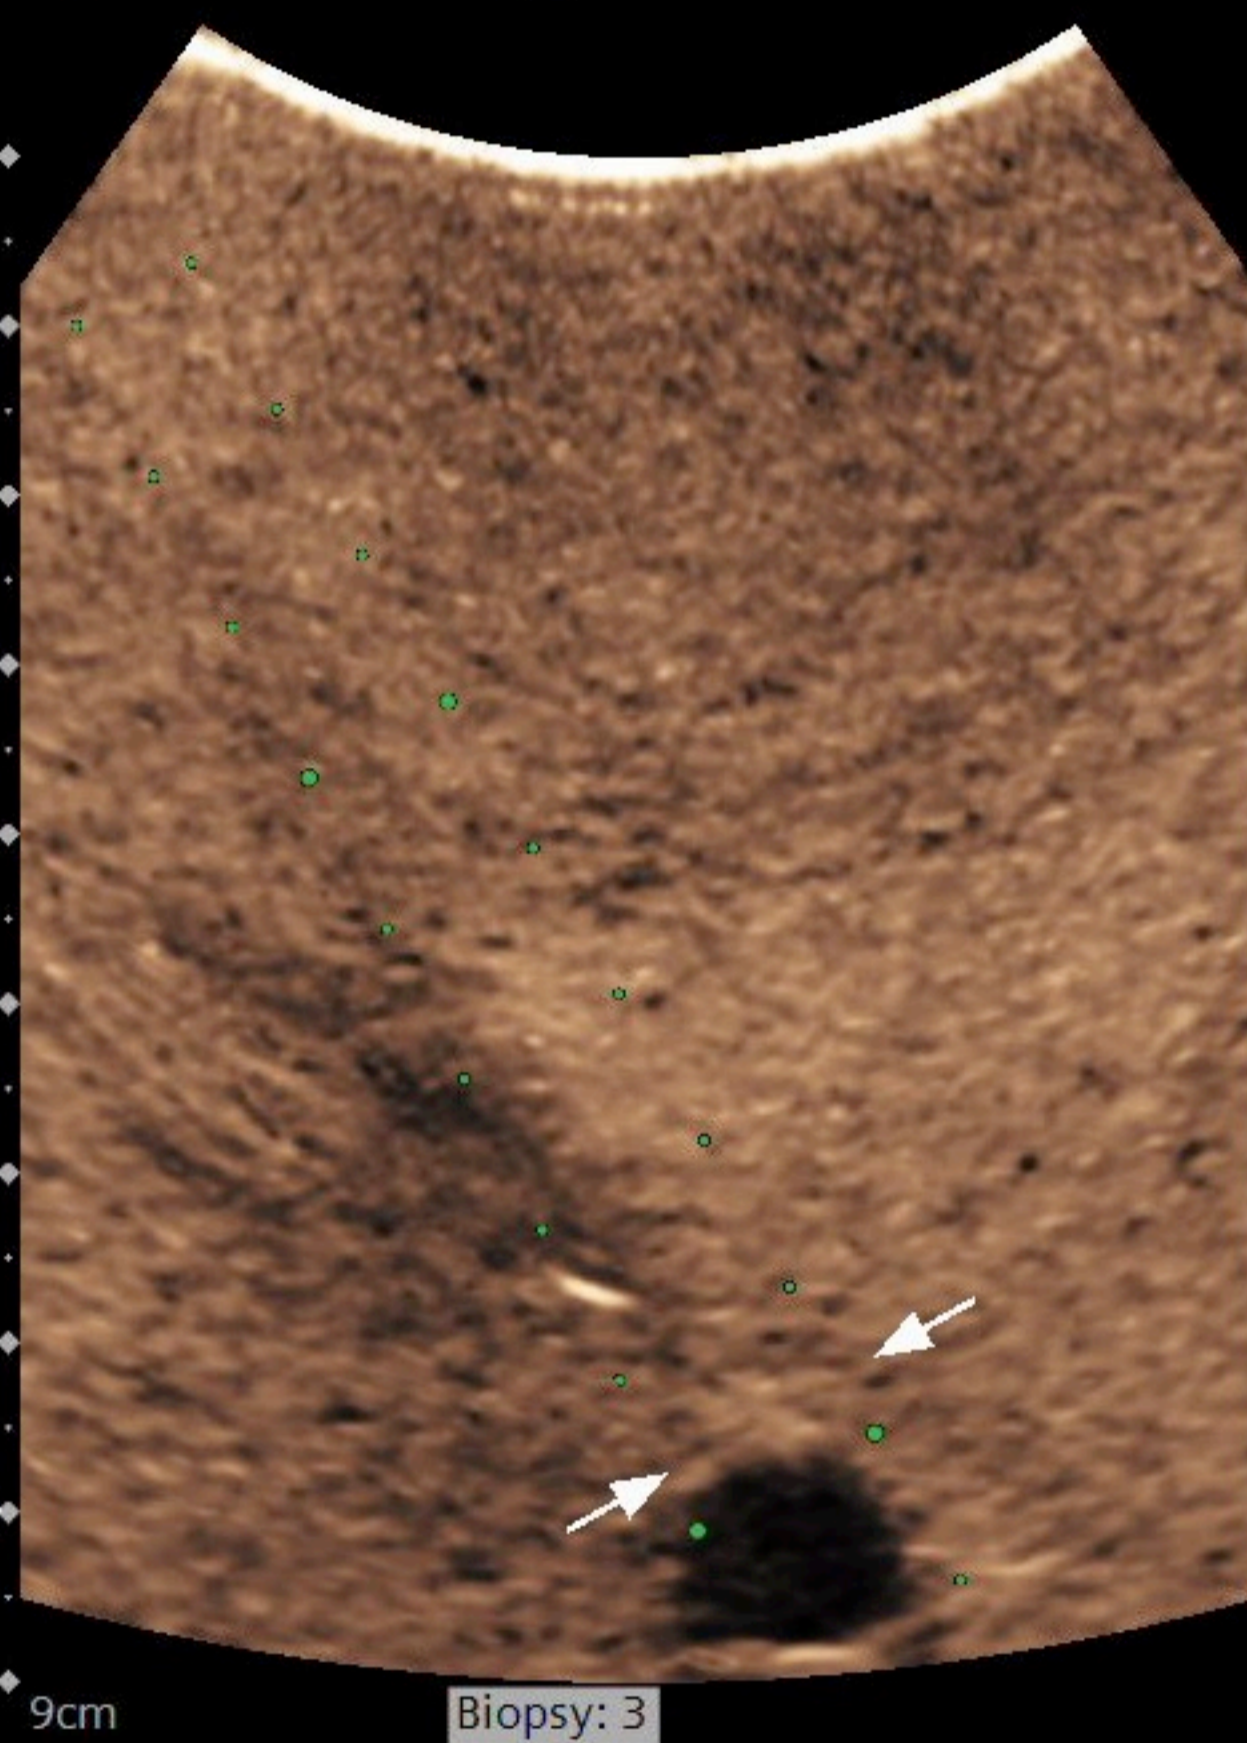

2nd puncture

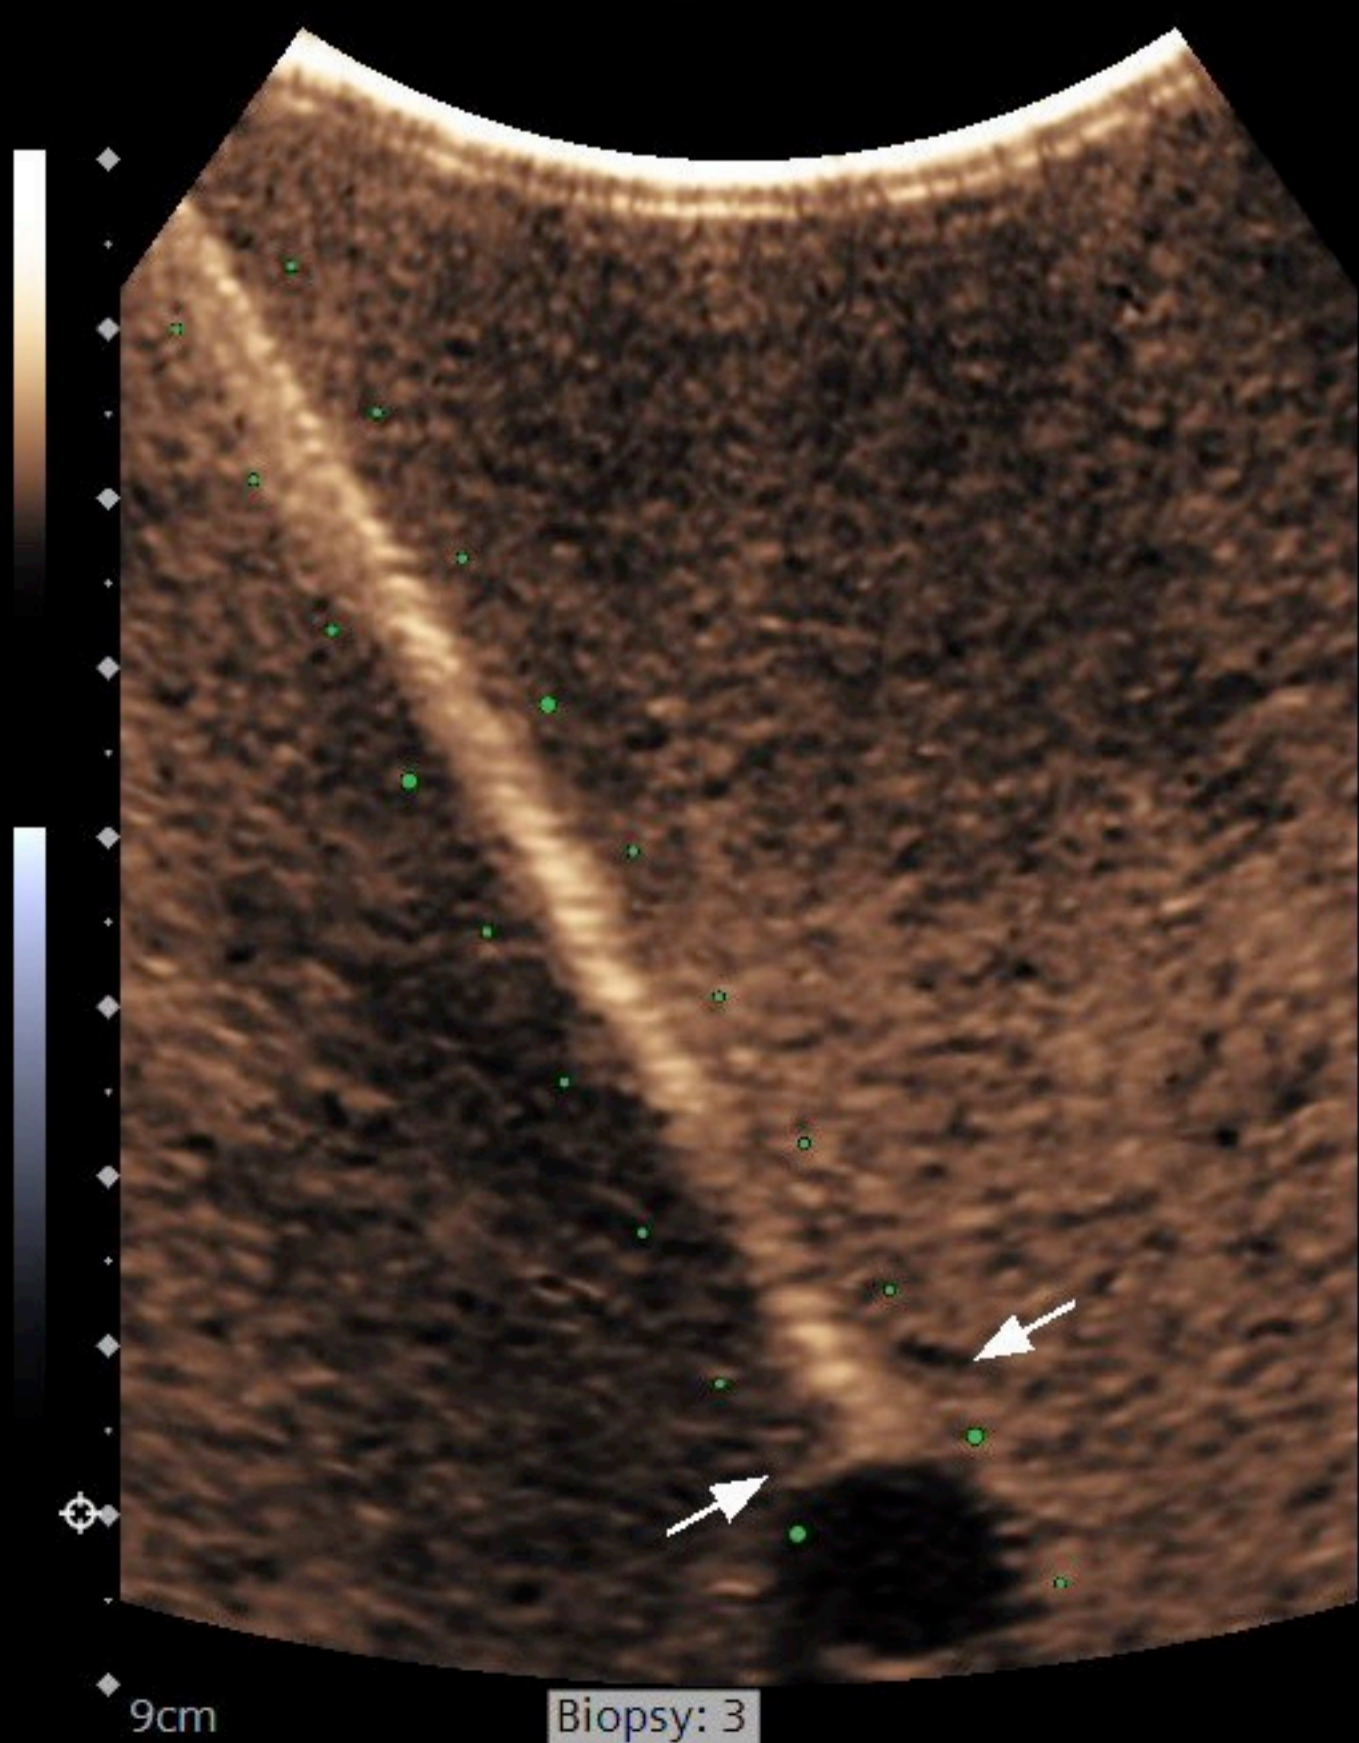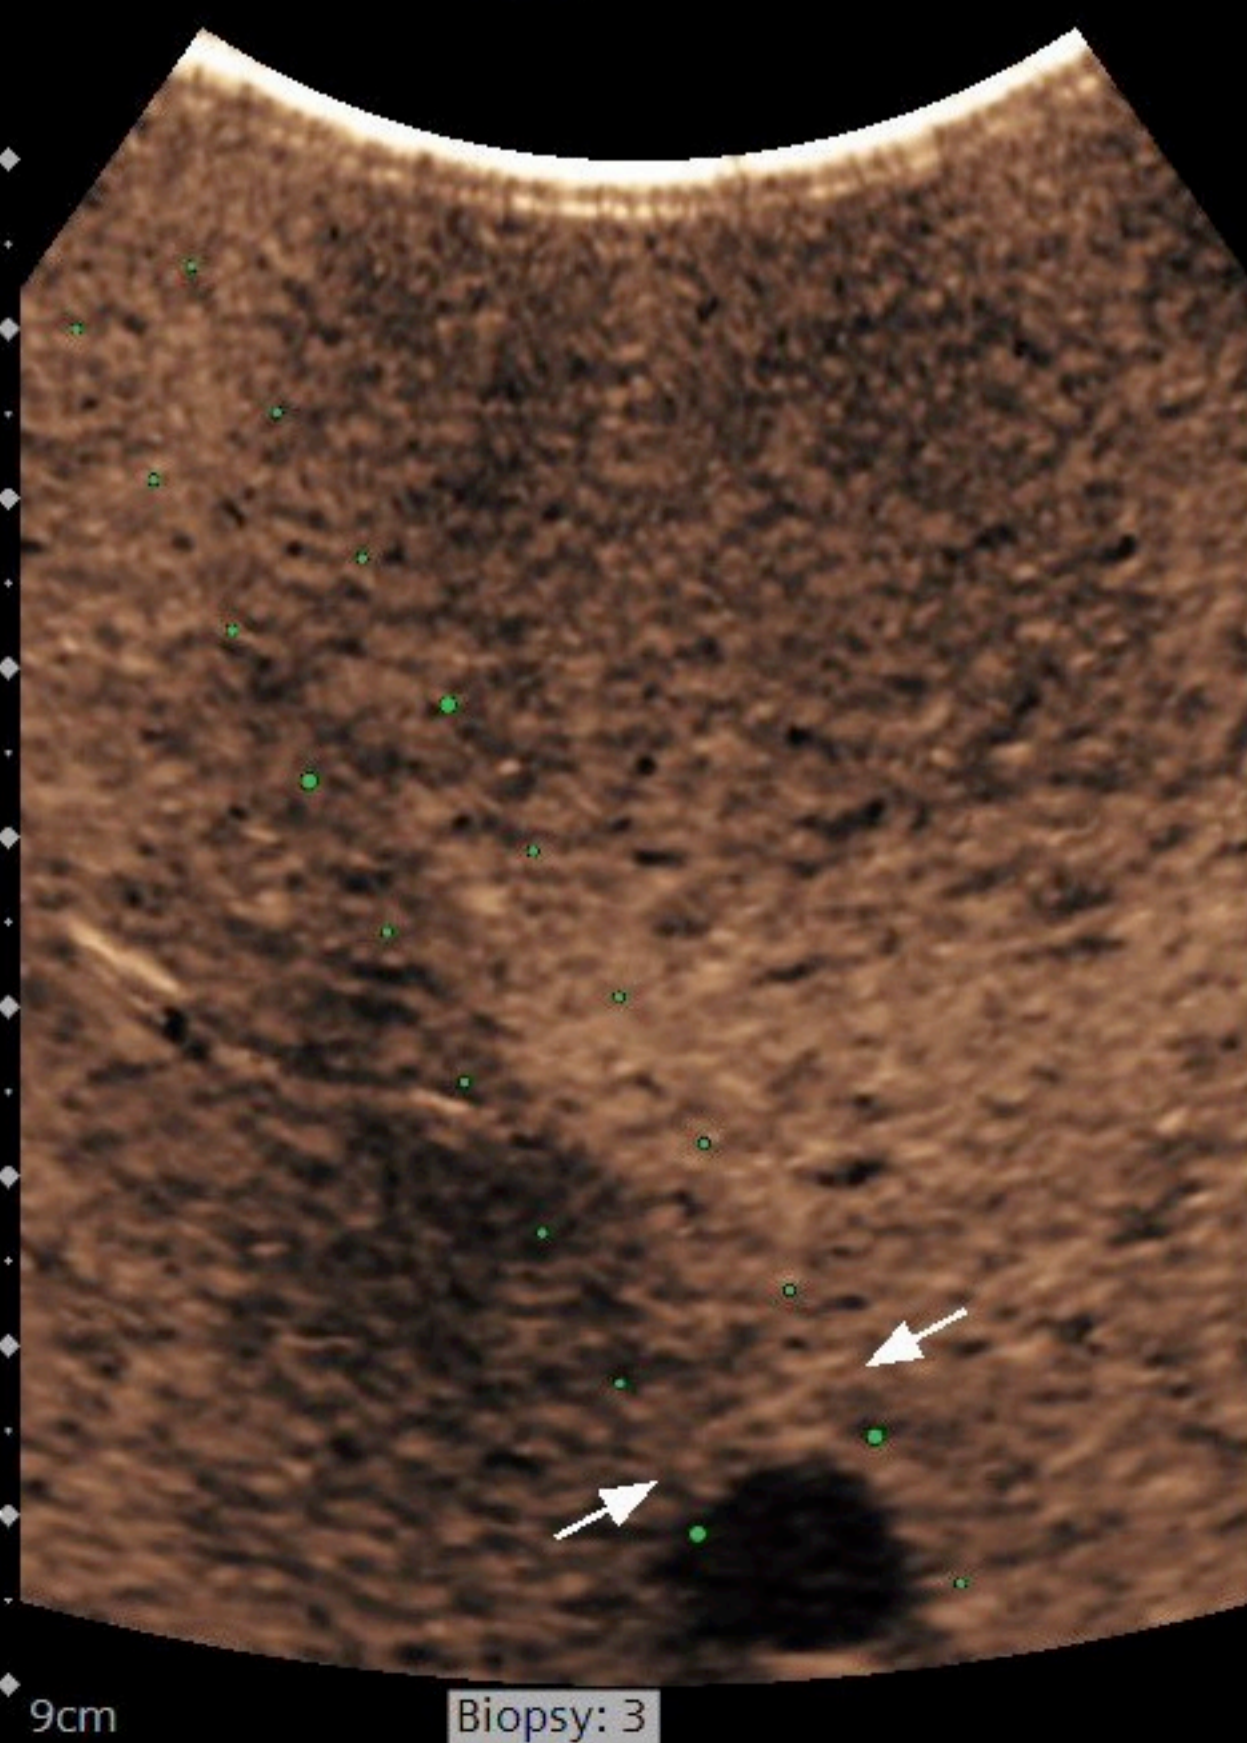

3rd puncture

Ultrasound contrast agent

Control



Full core biopsy needle (set 4/10)

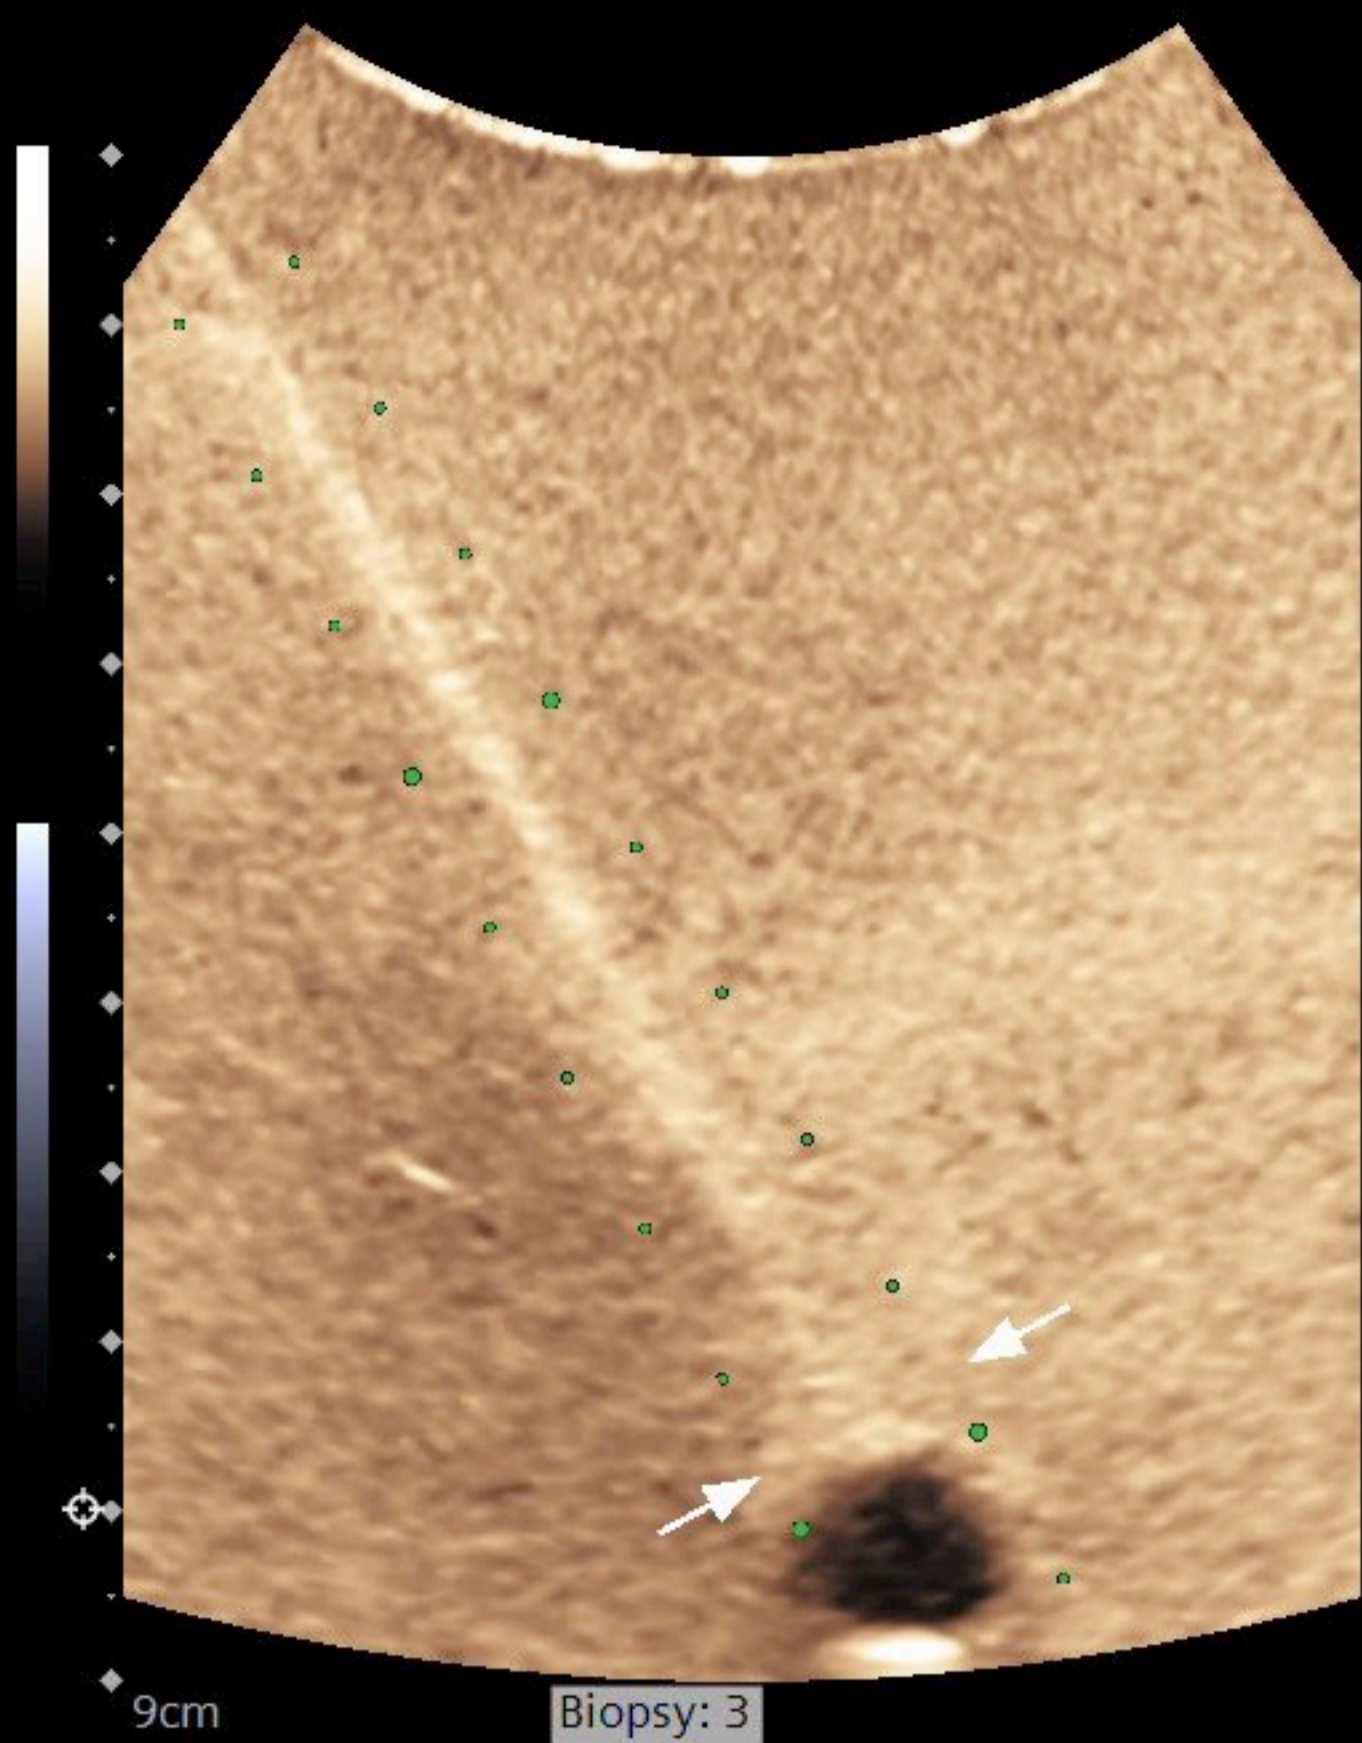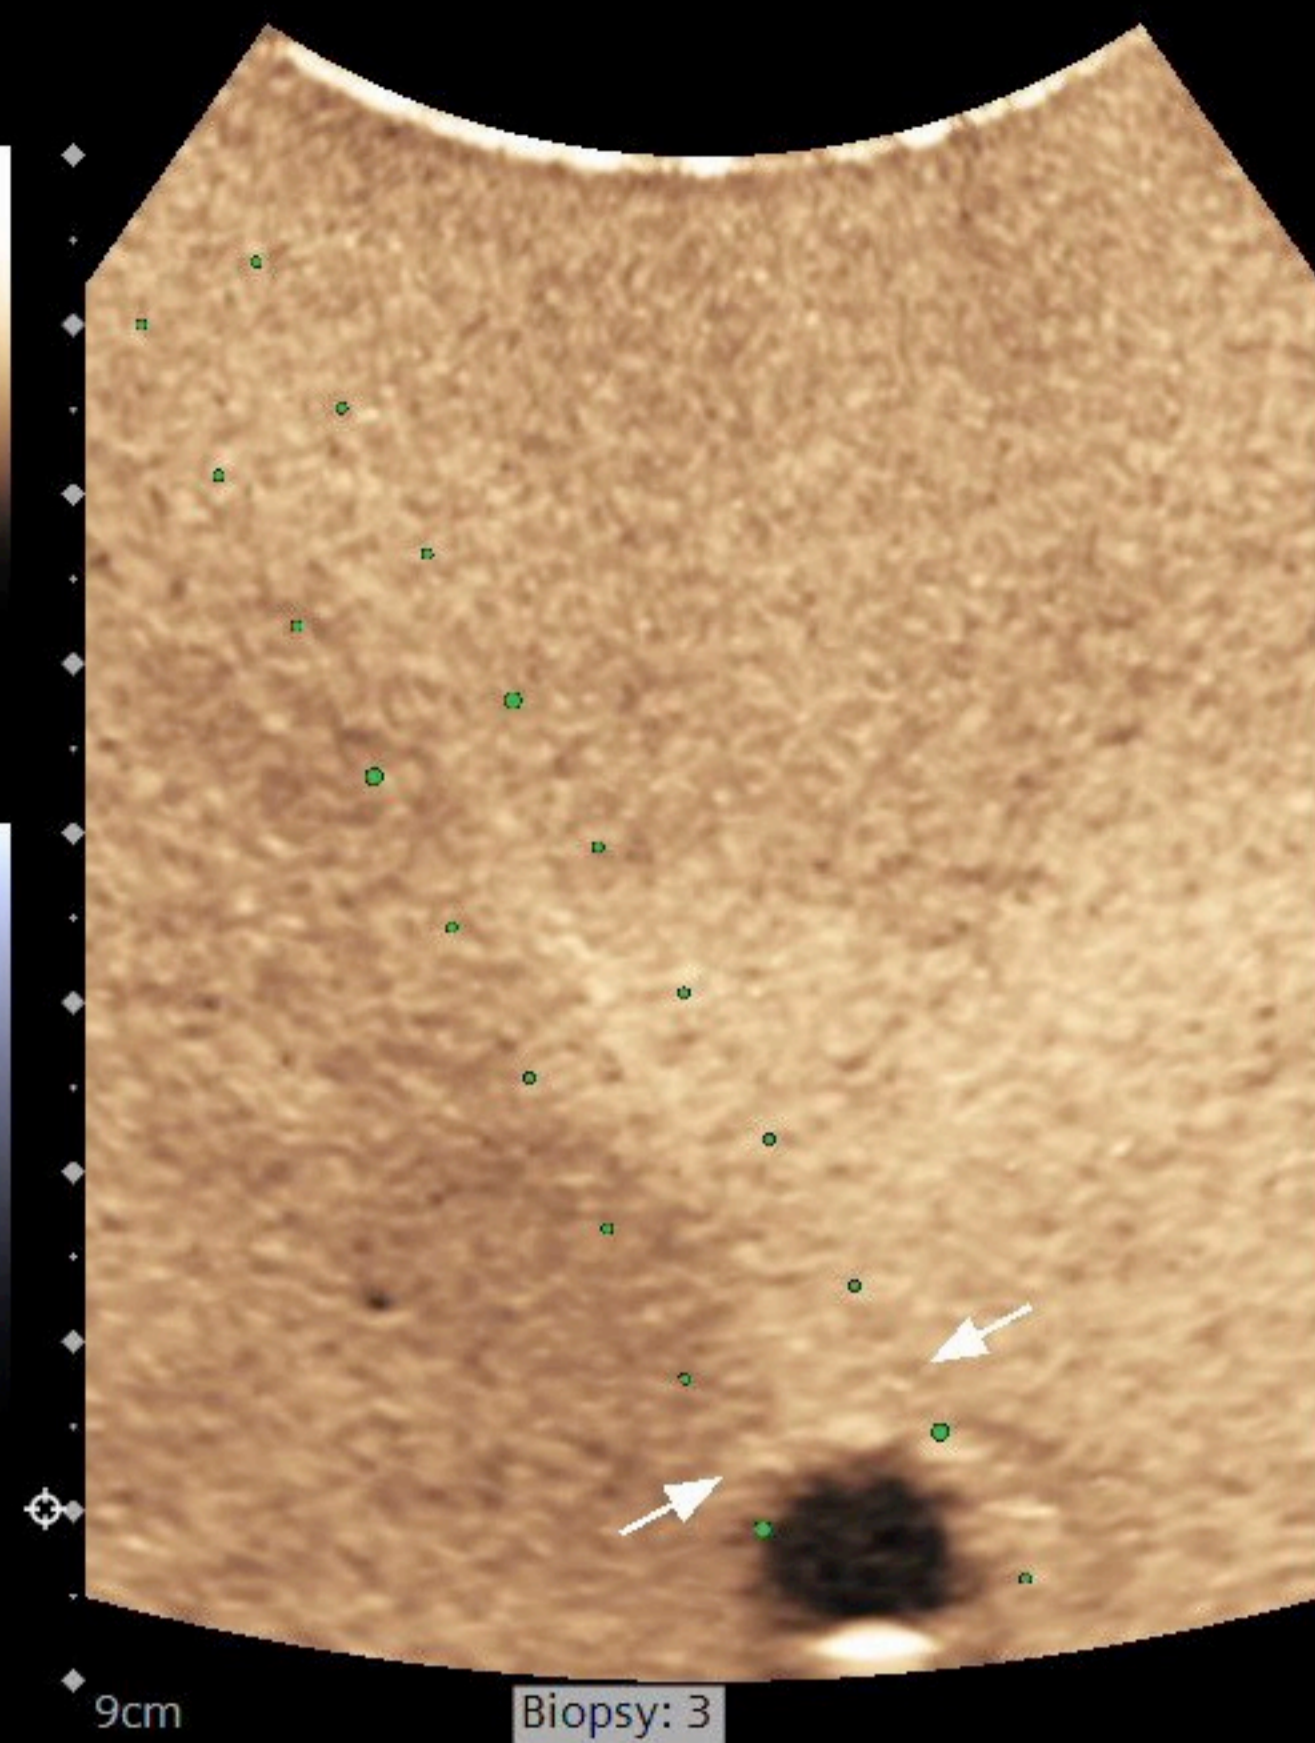

1st puncture

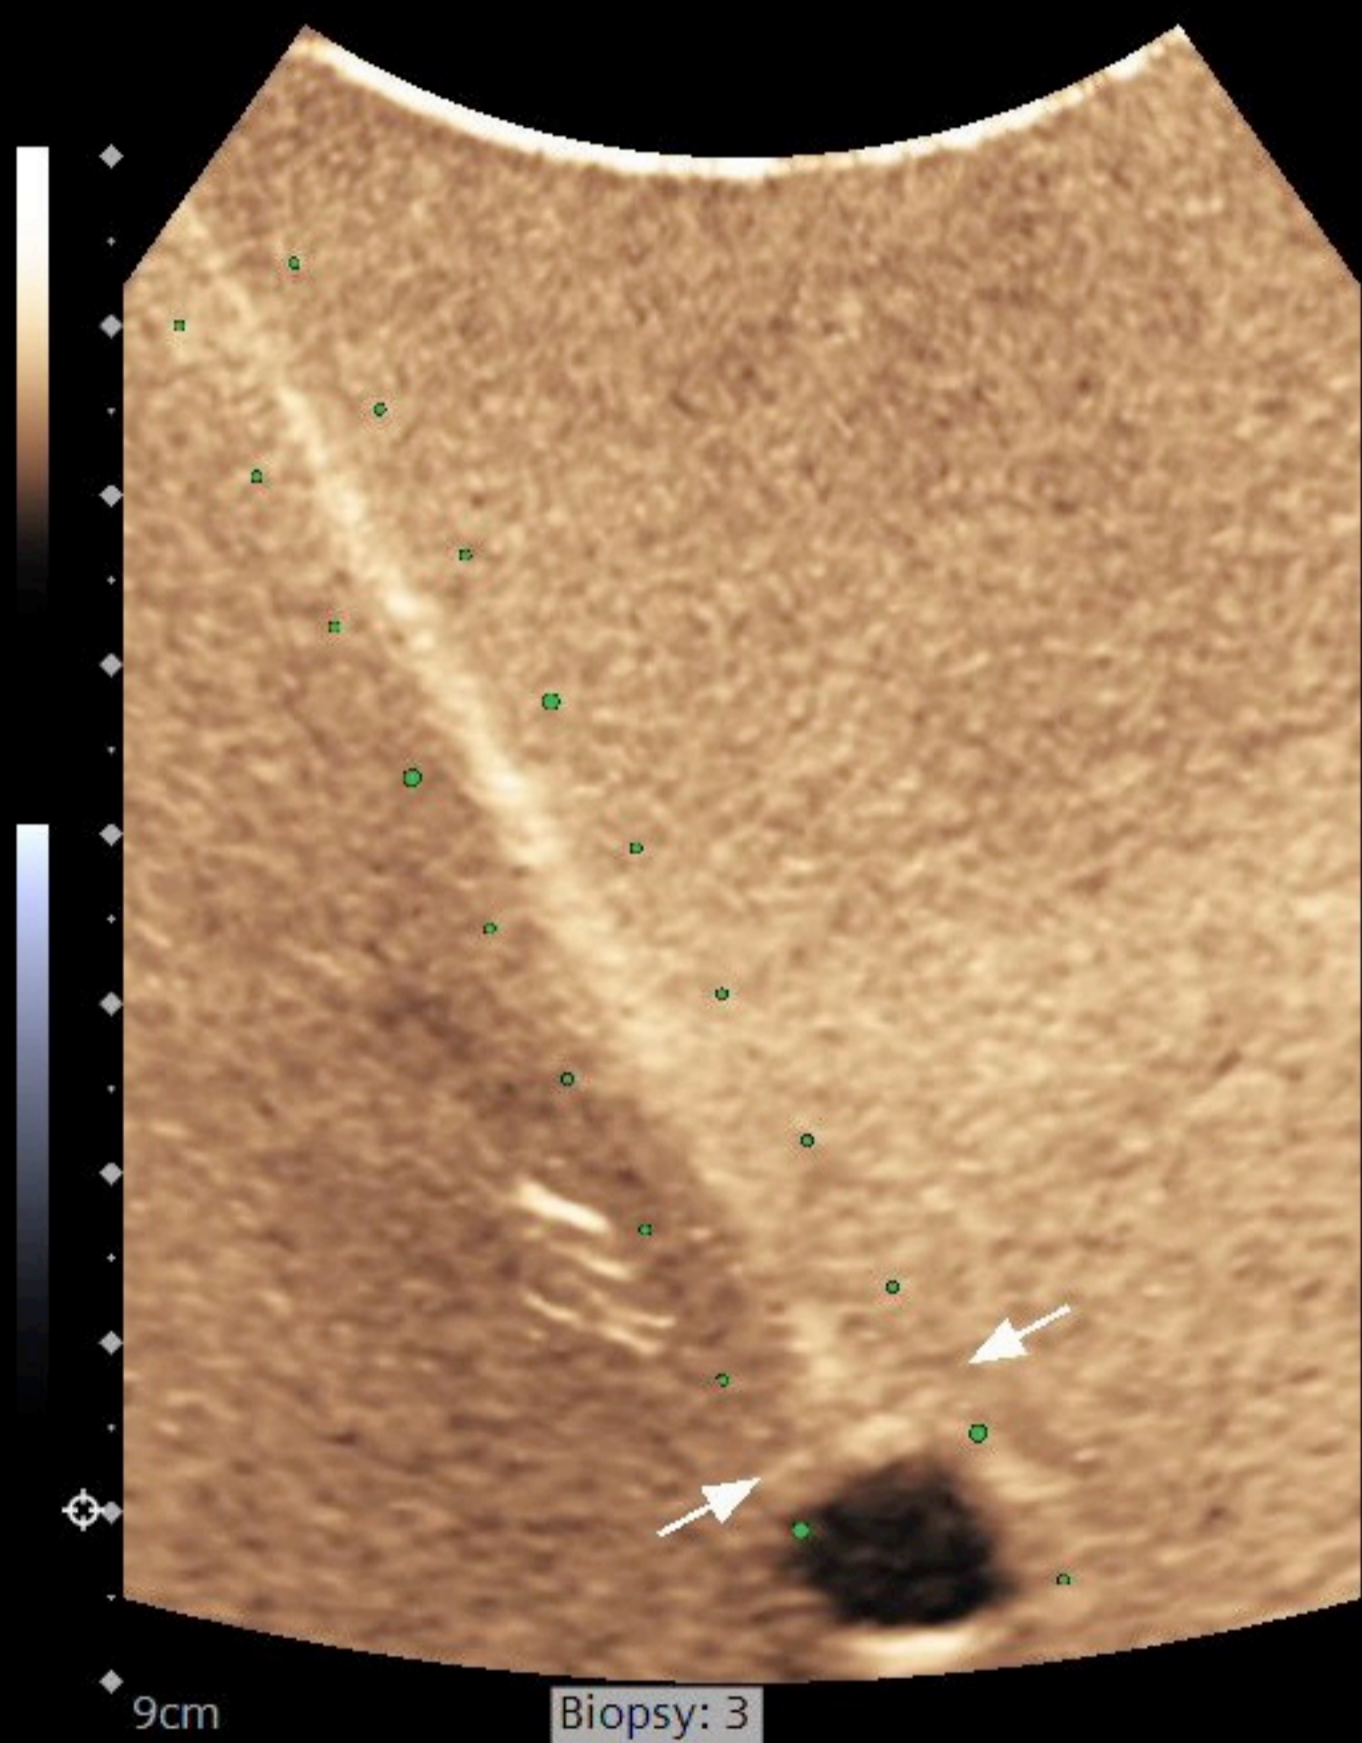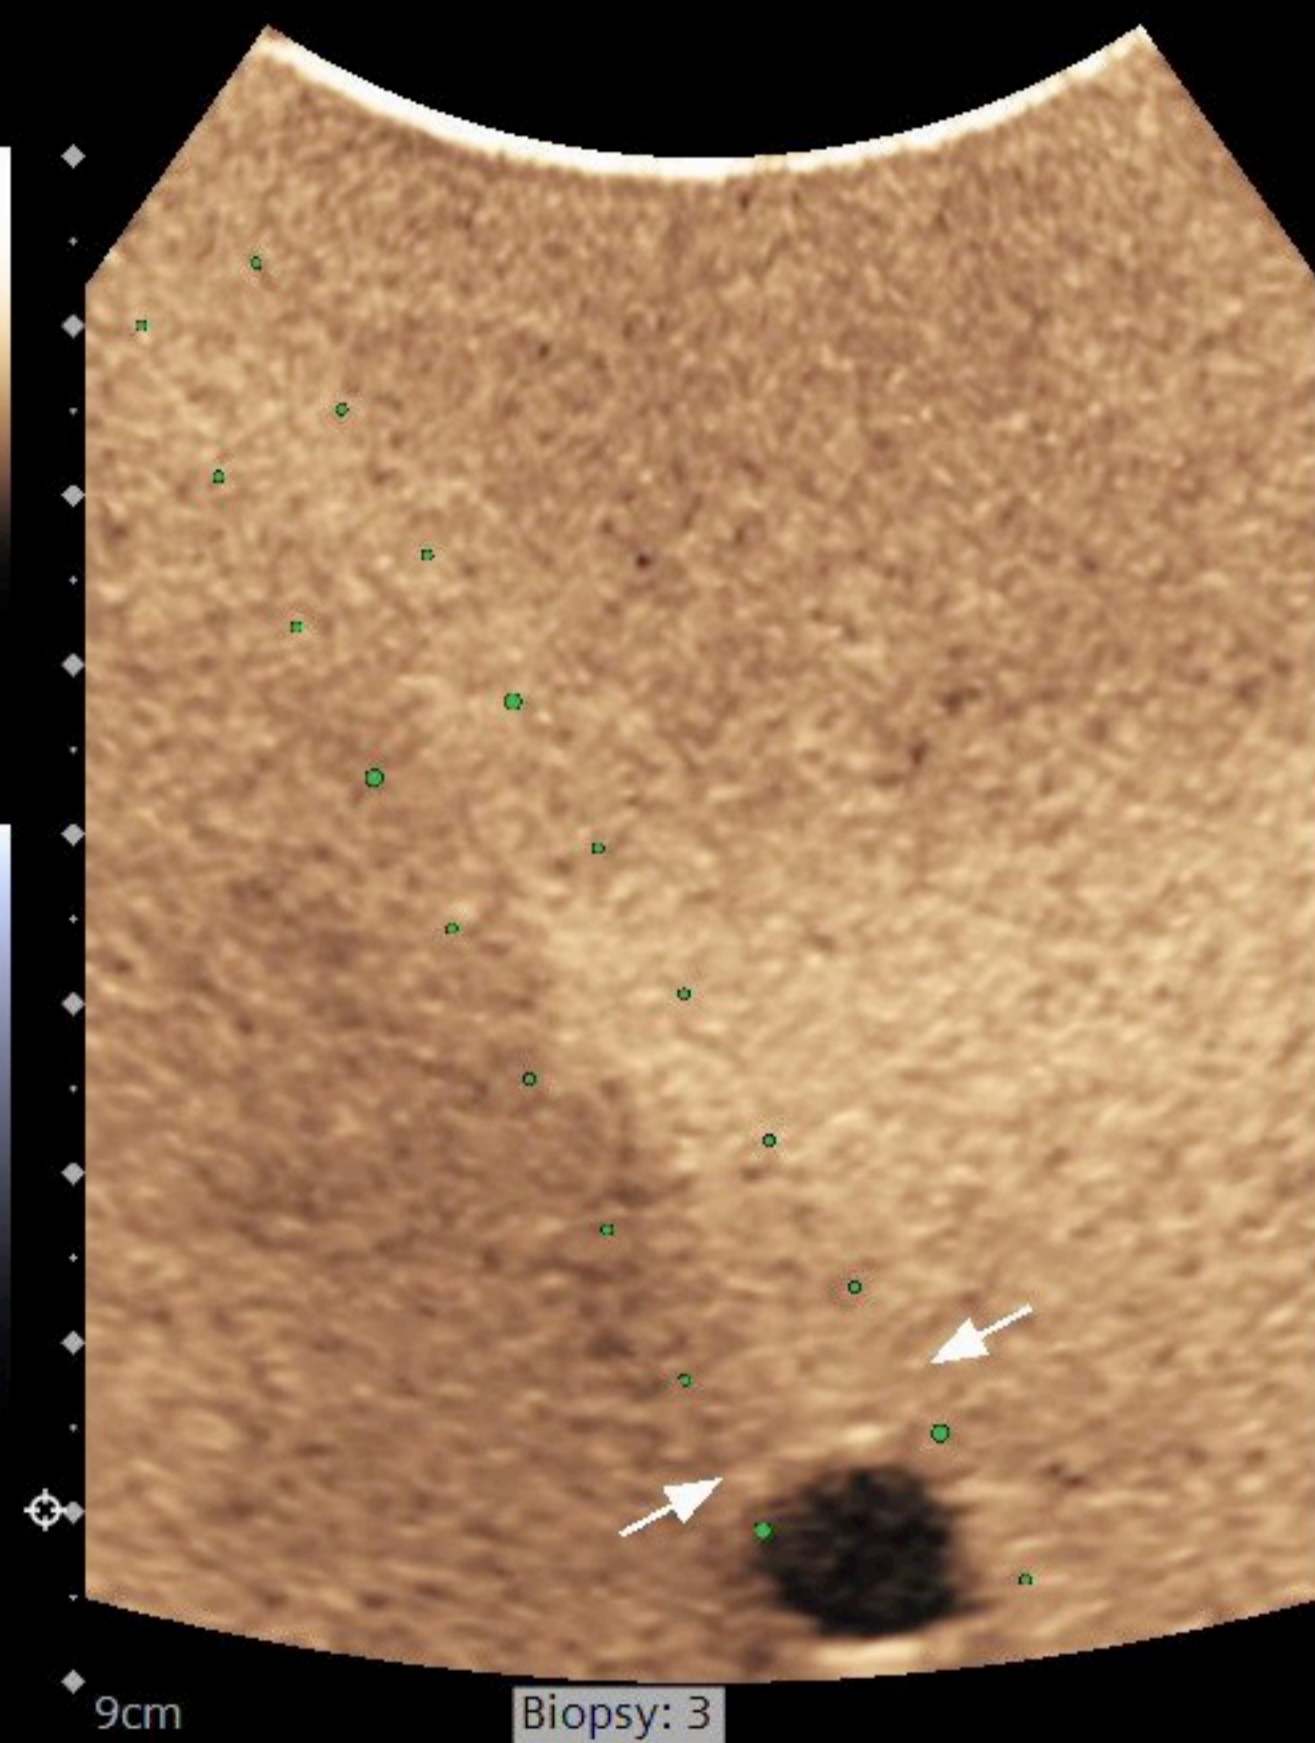

2nd puncture

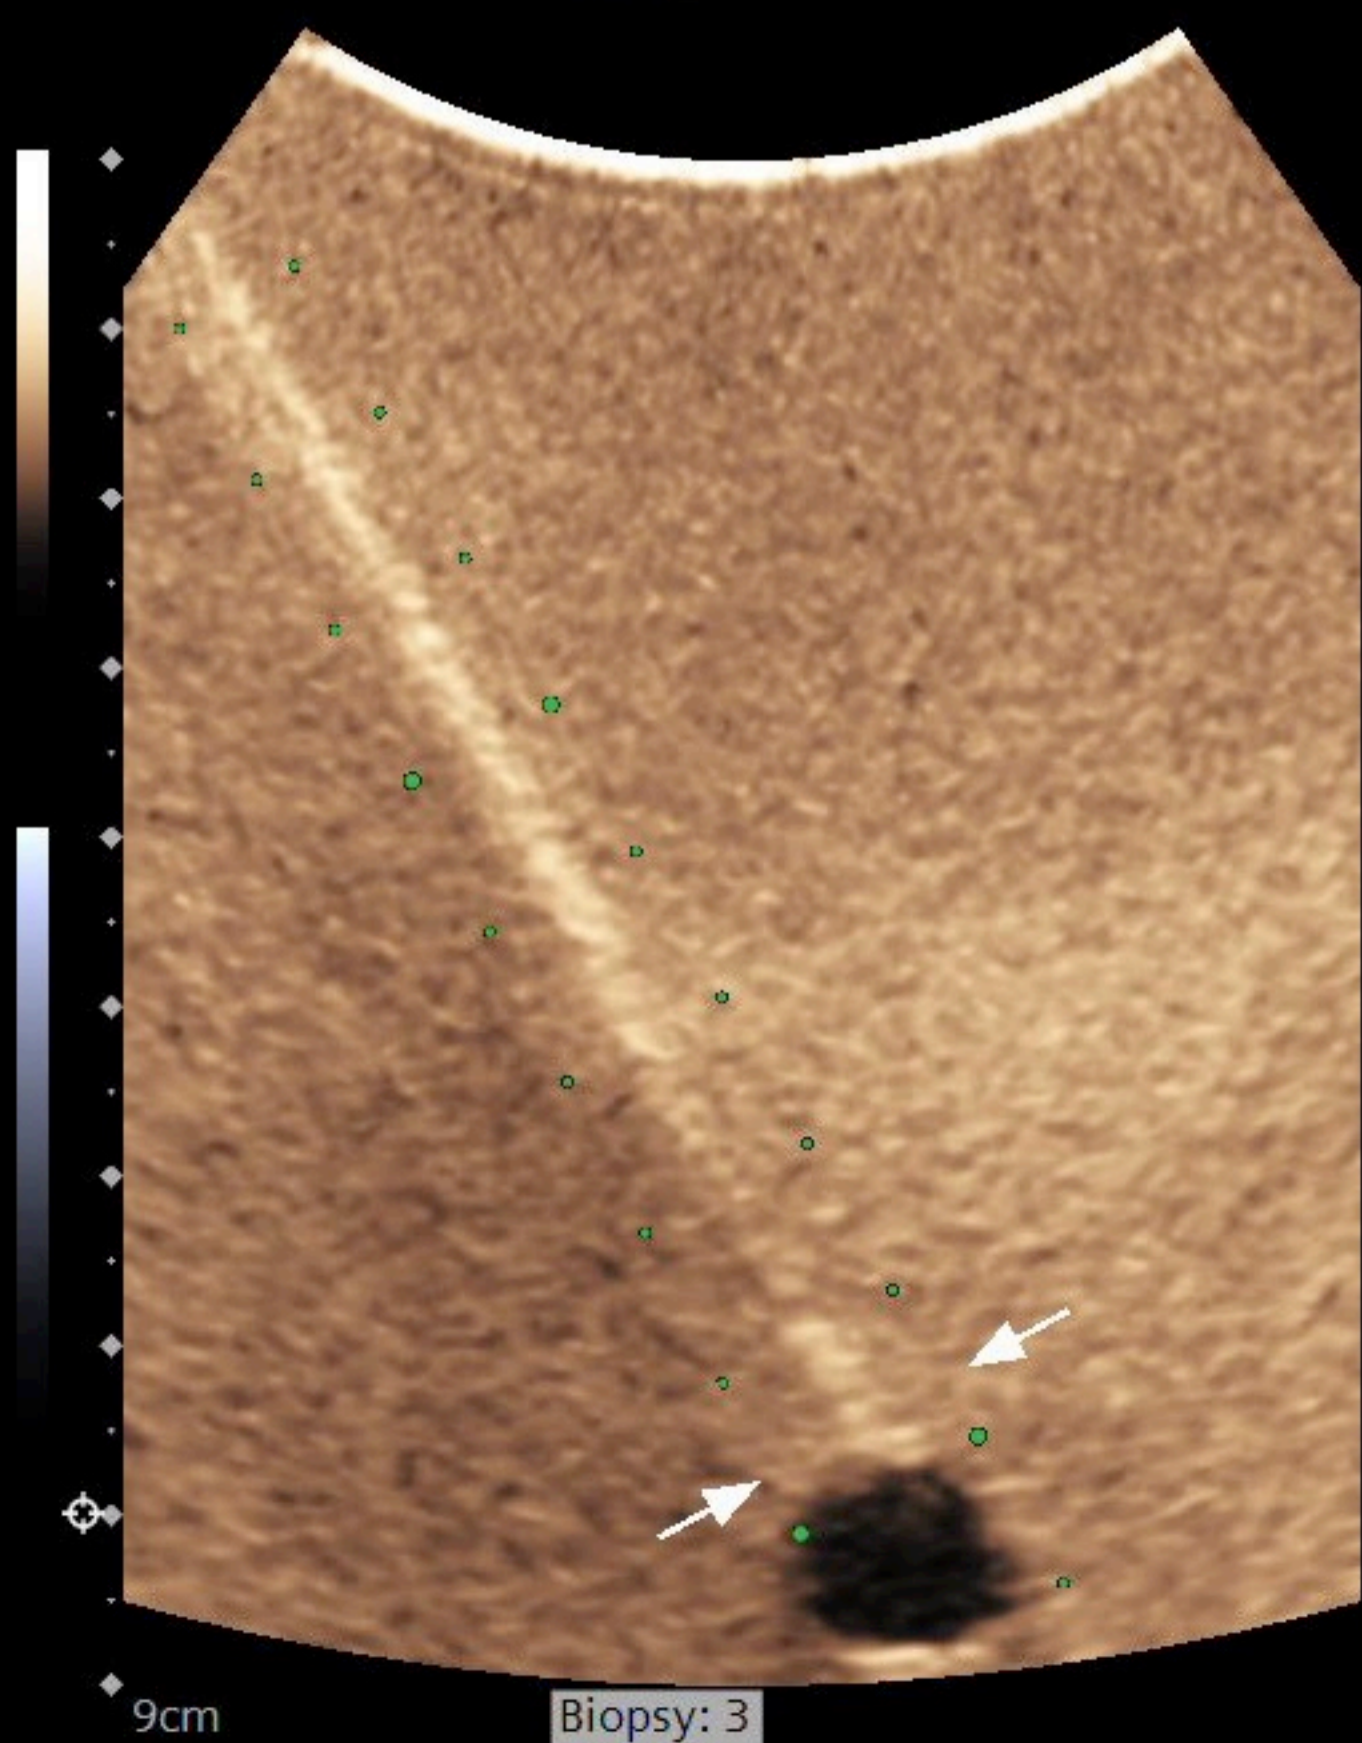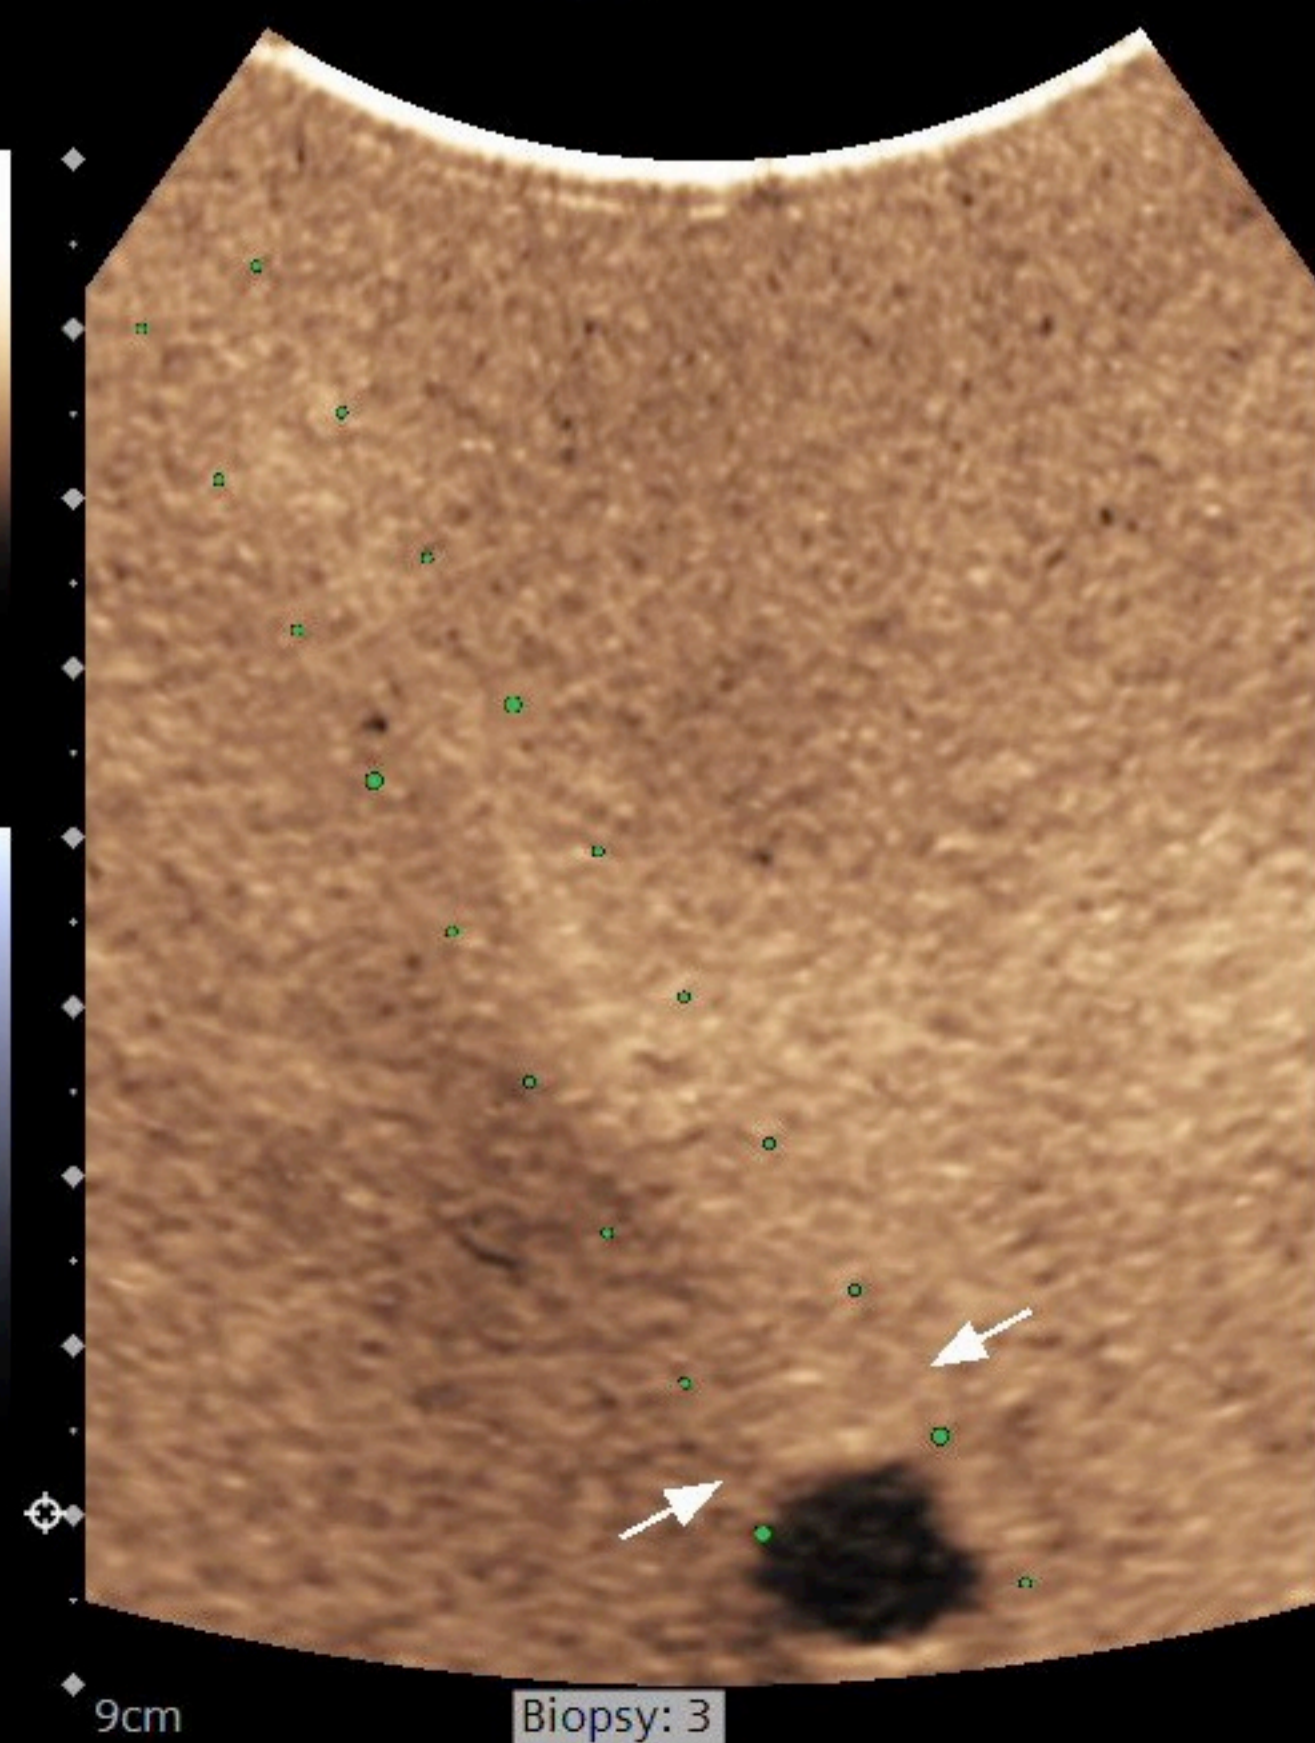

3rd puncture

Ultrasound contrast agent

Control



Full core biopsy needle (set 5/10)

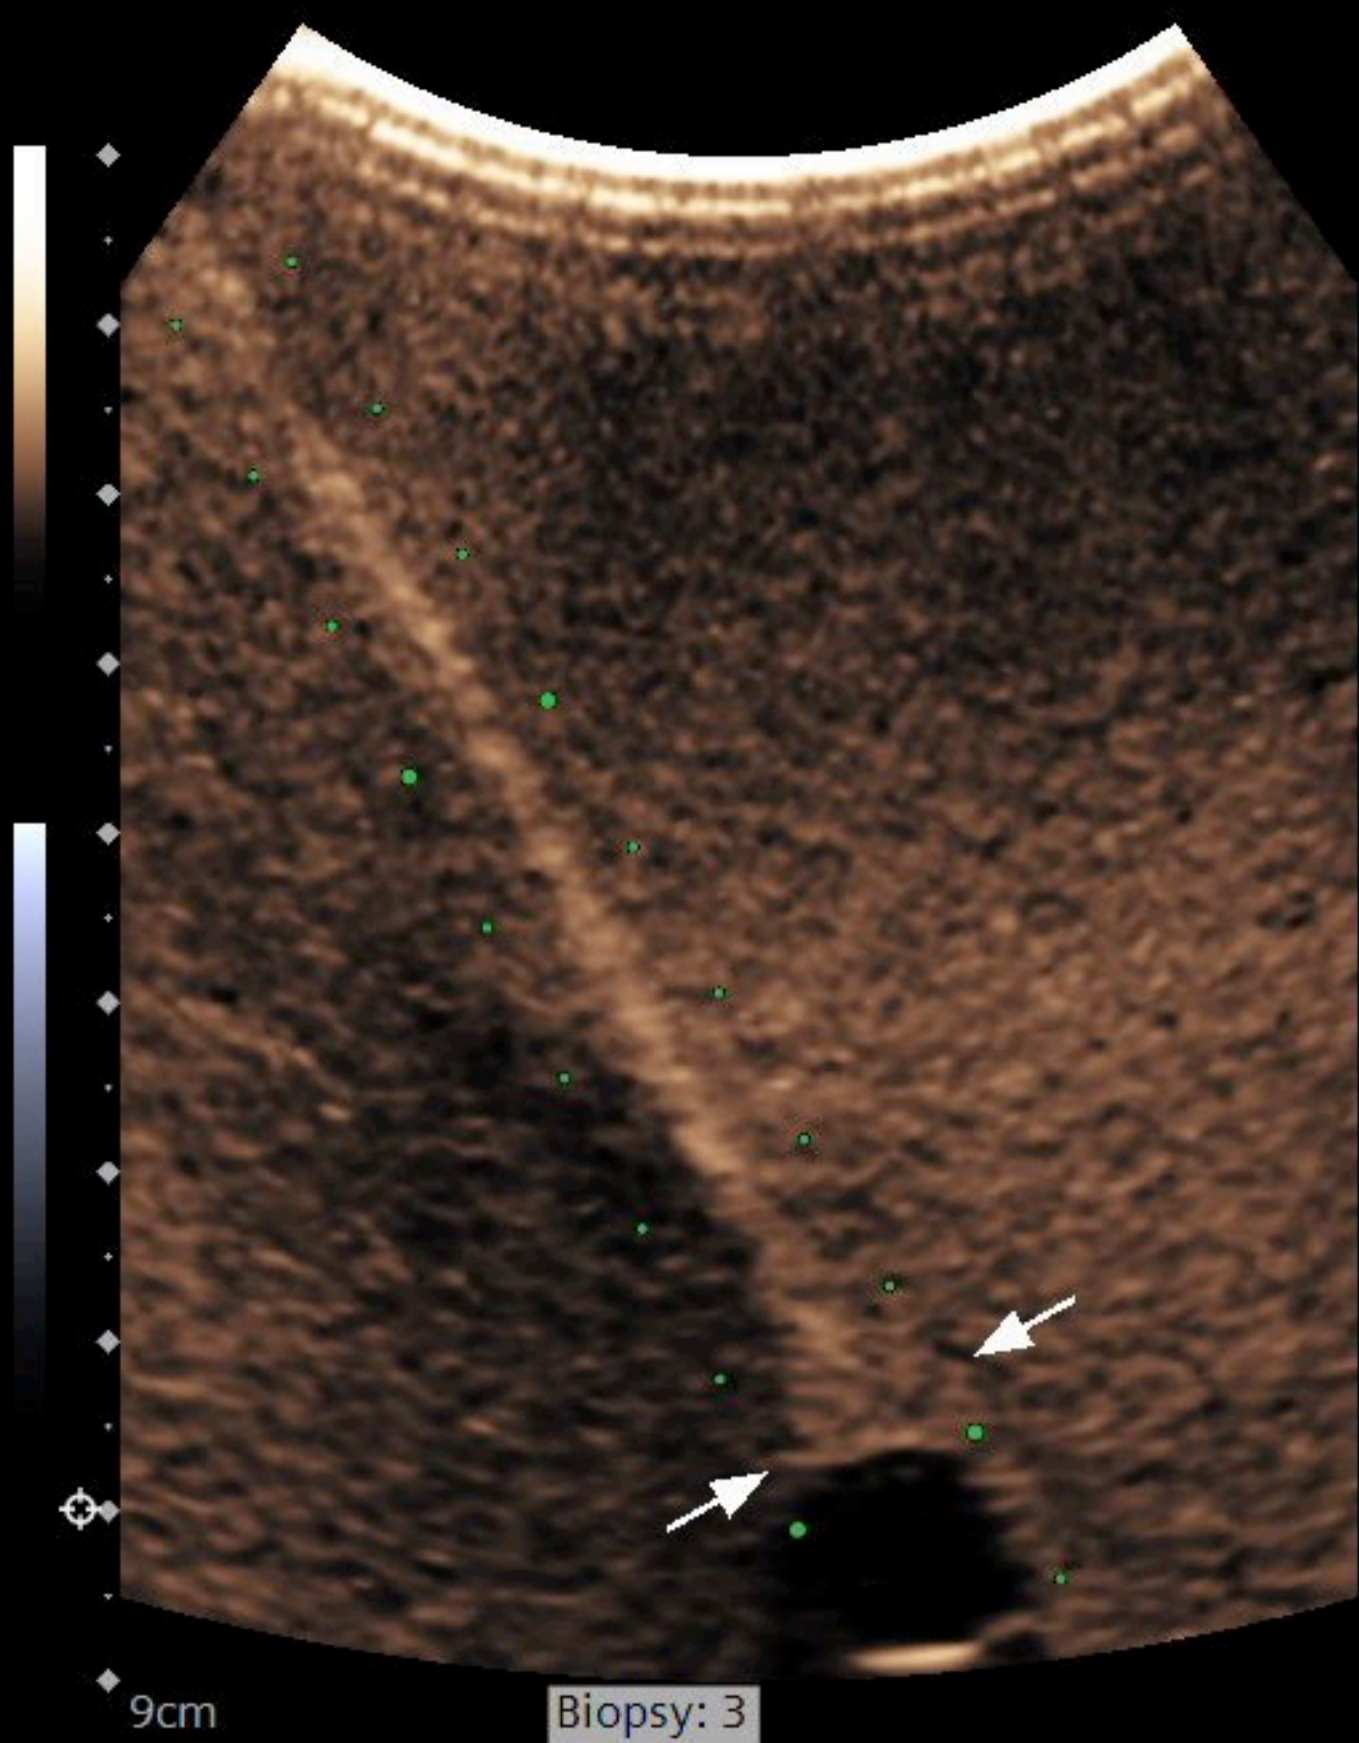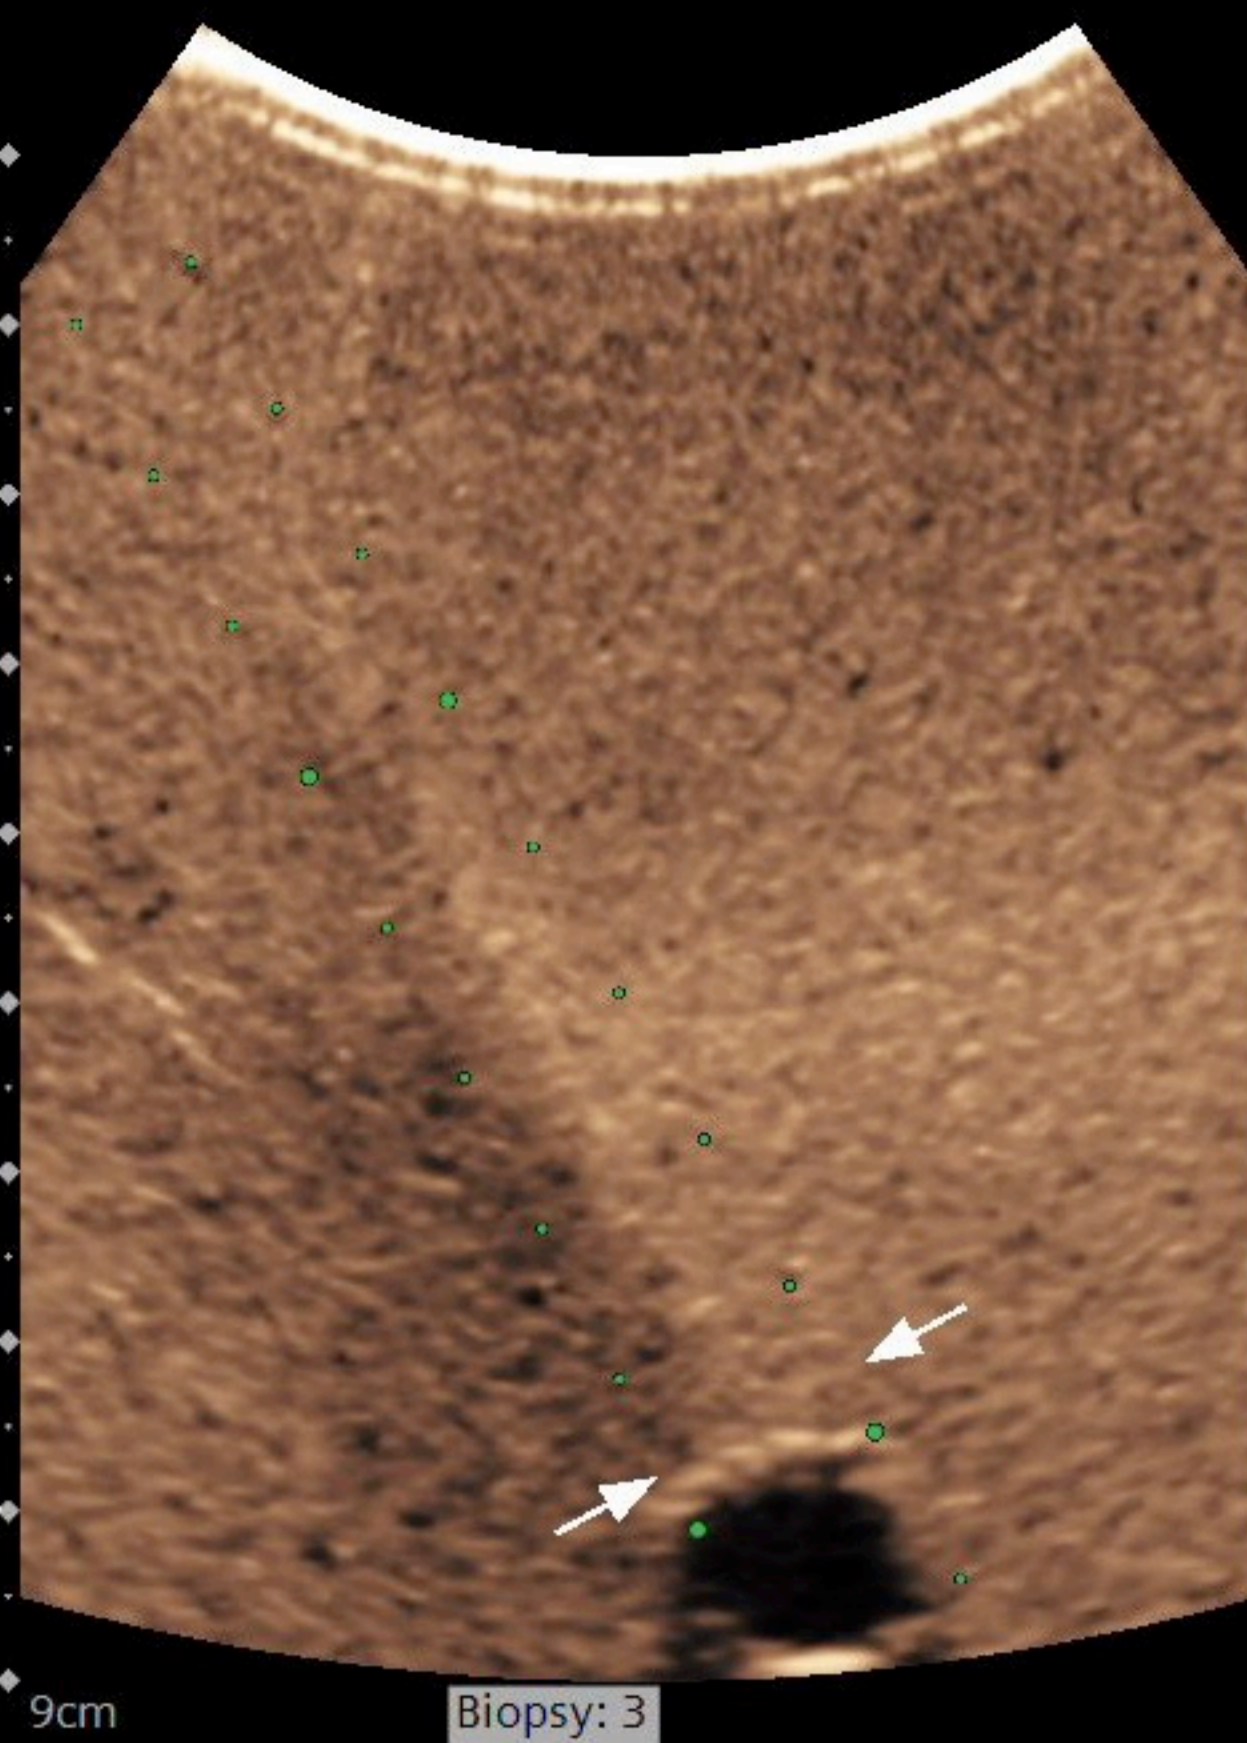

1st puncture

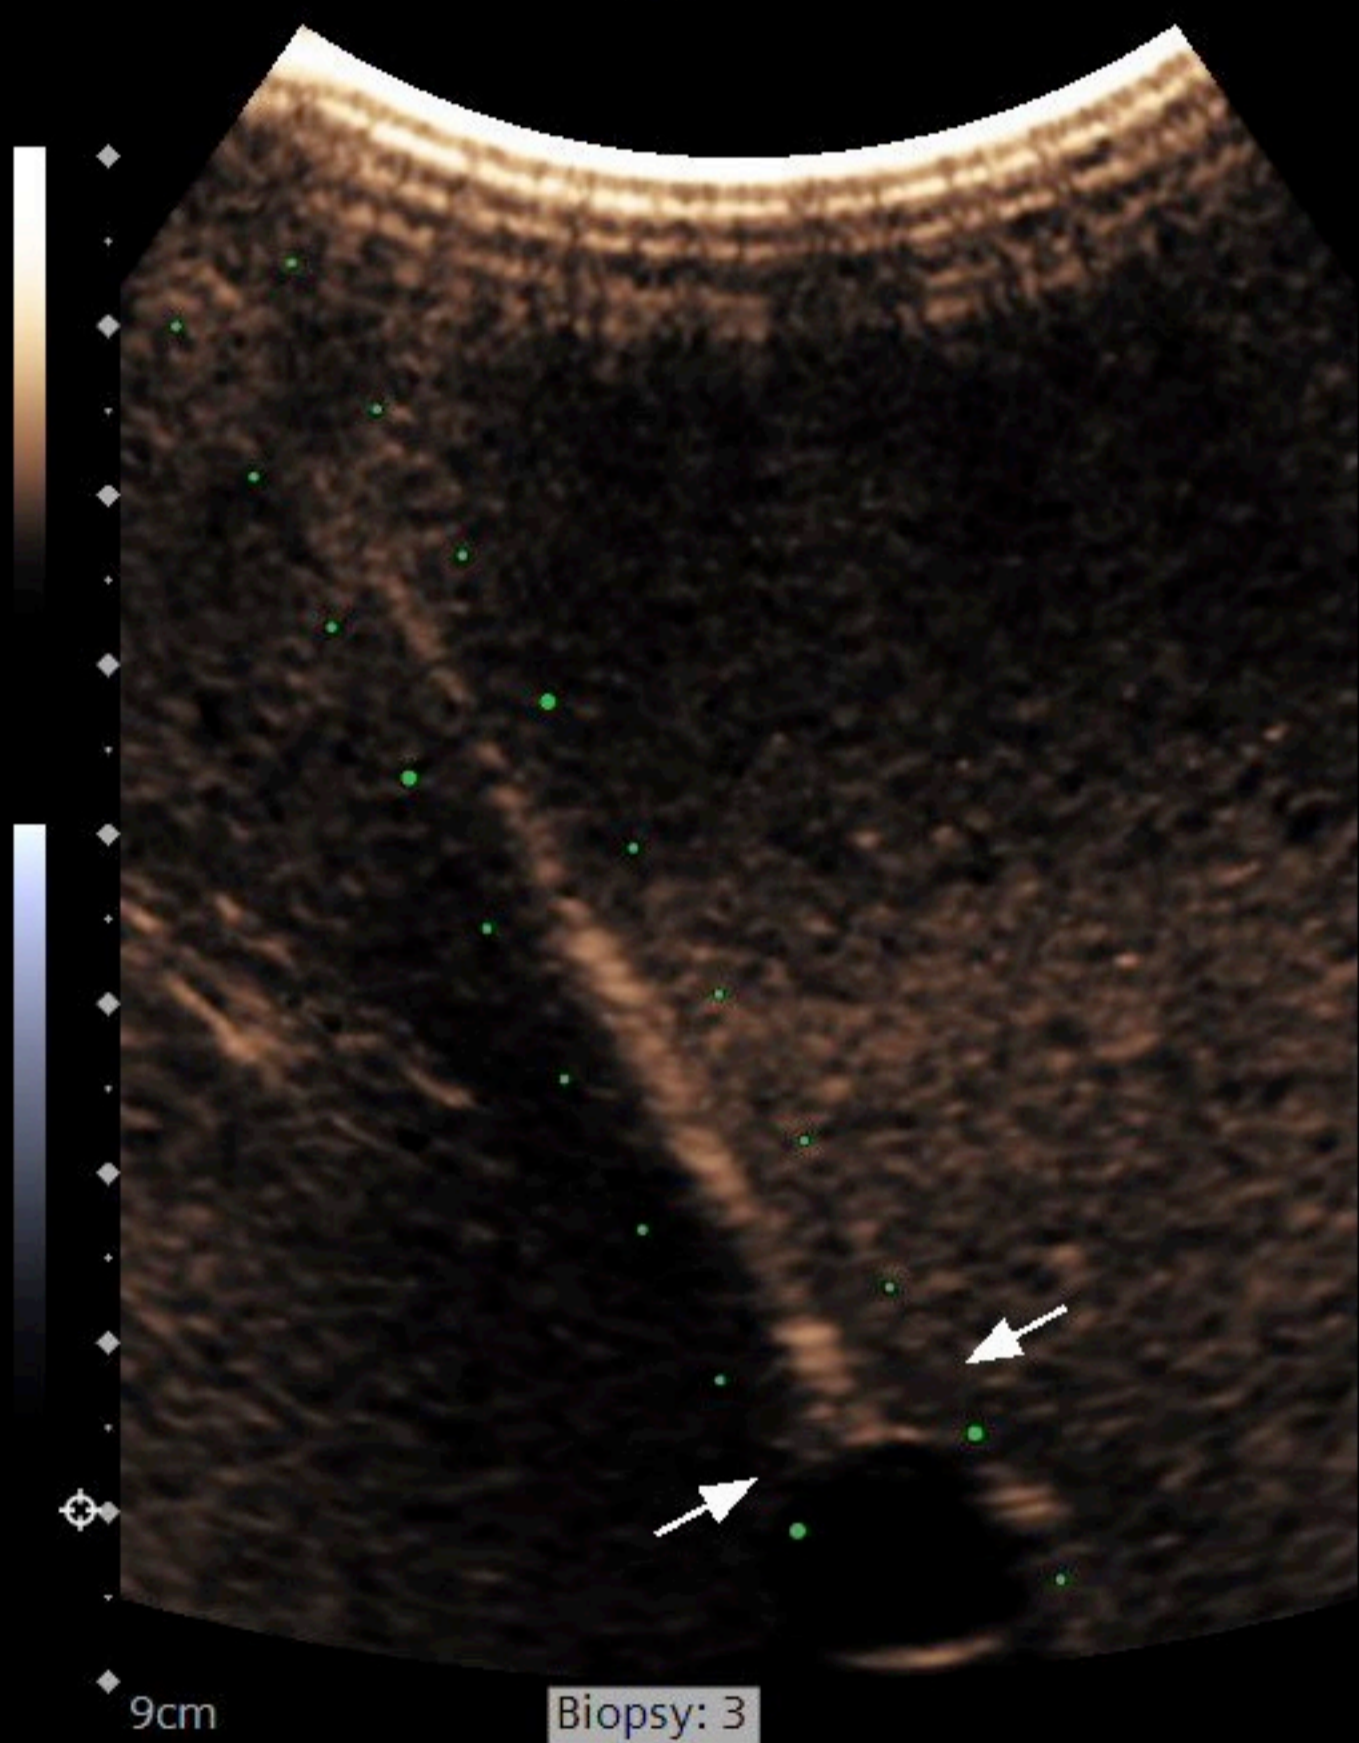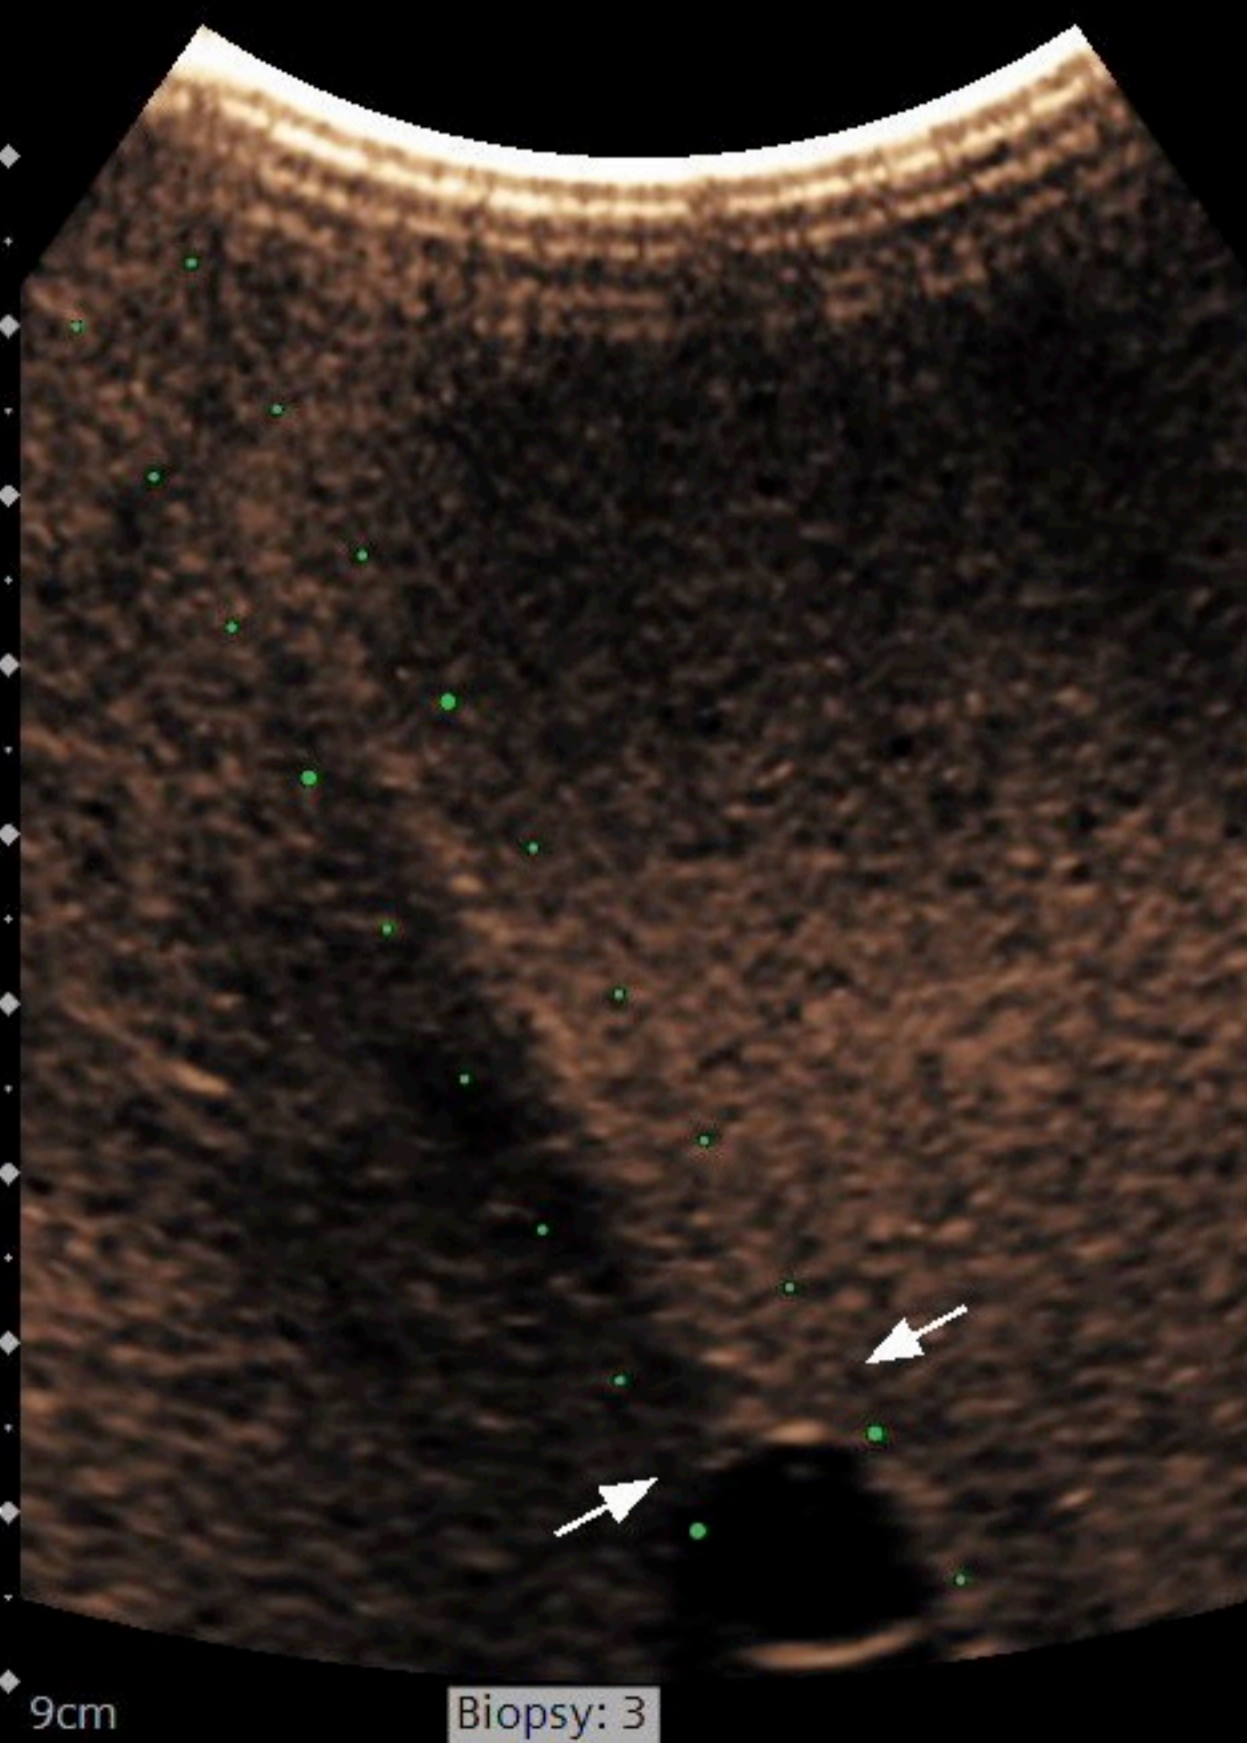

2nd puncture

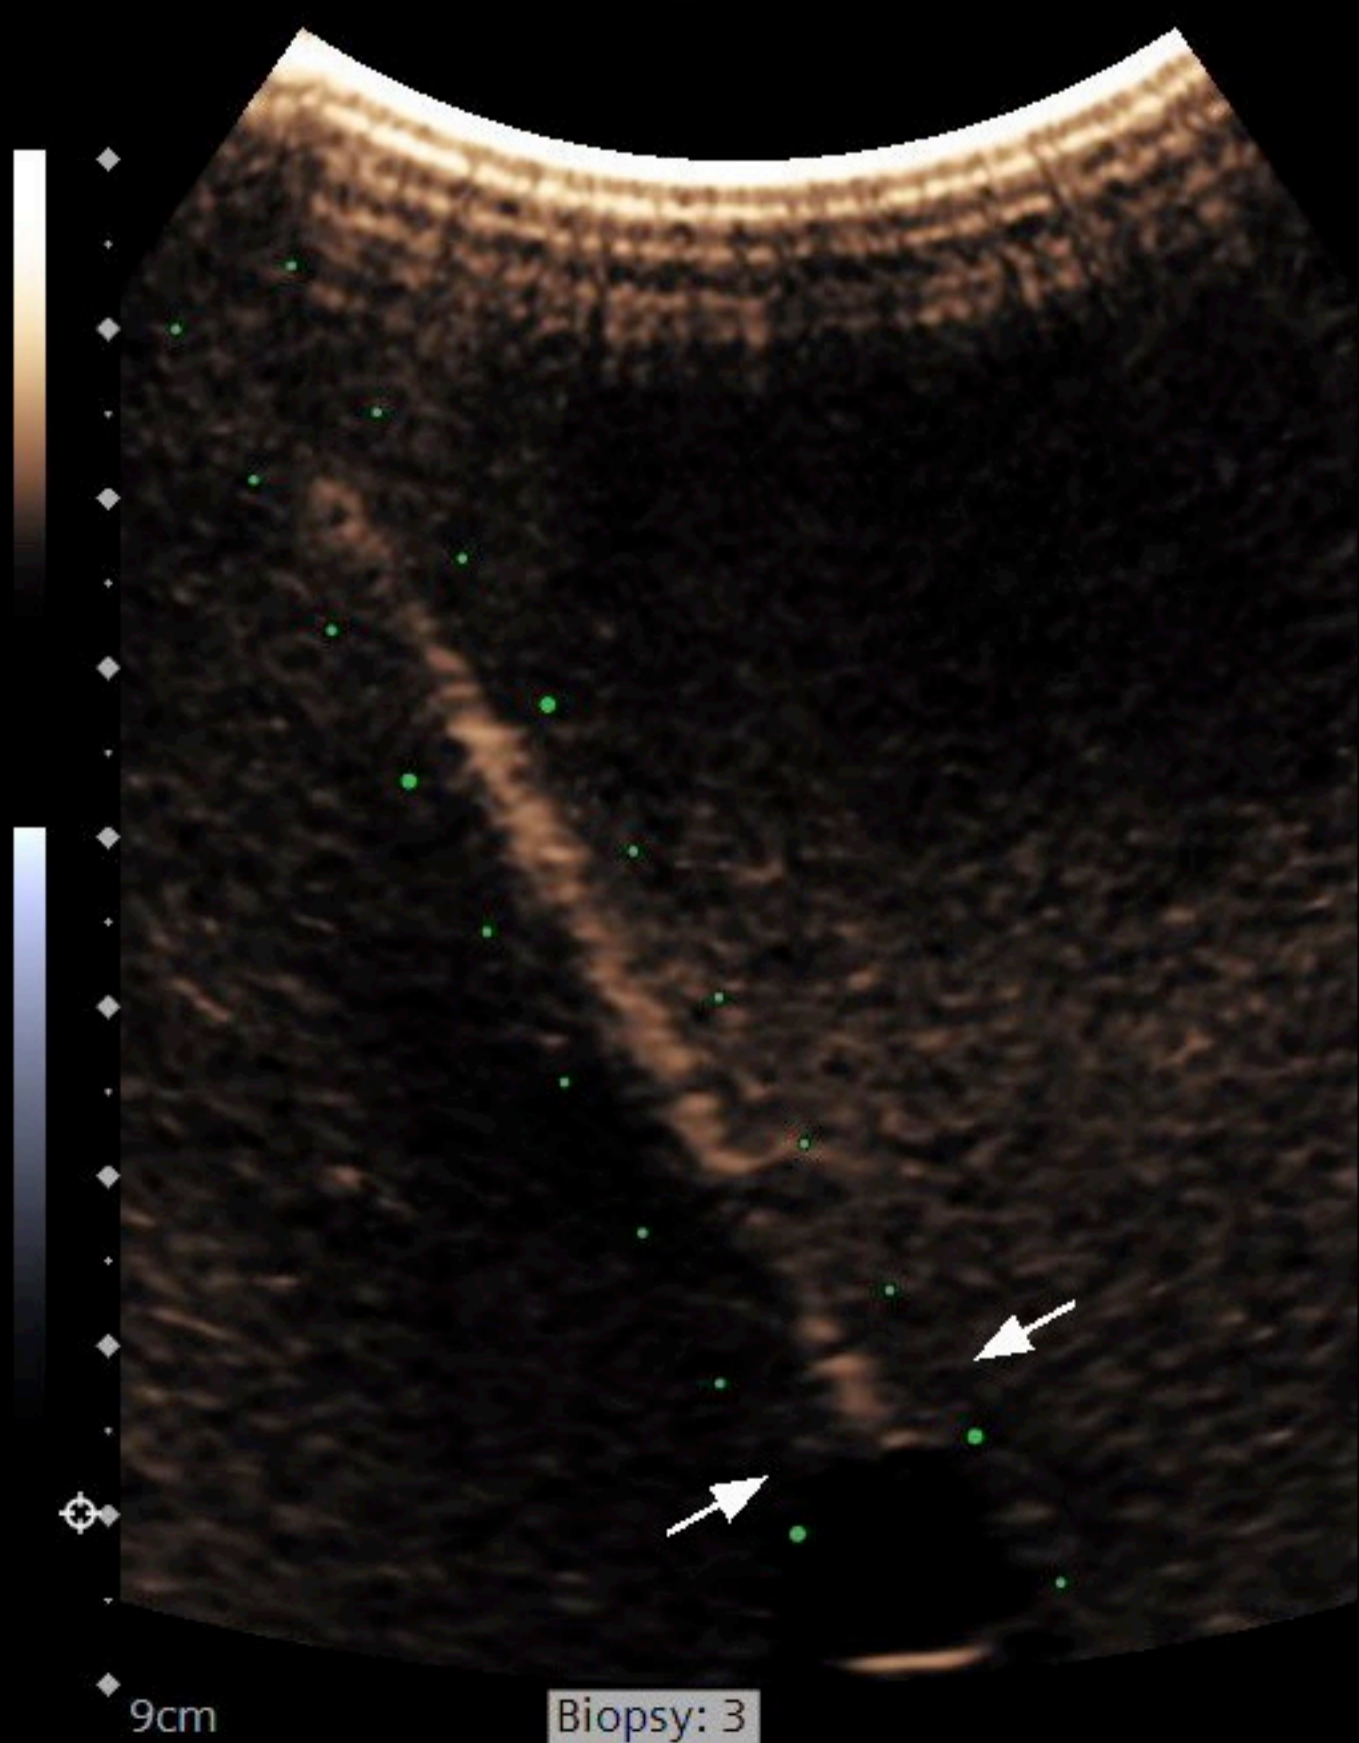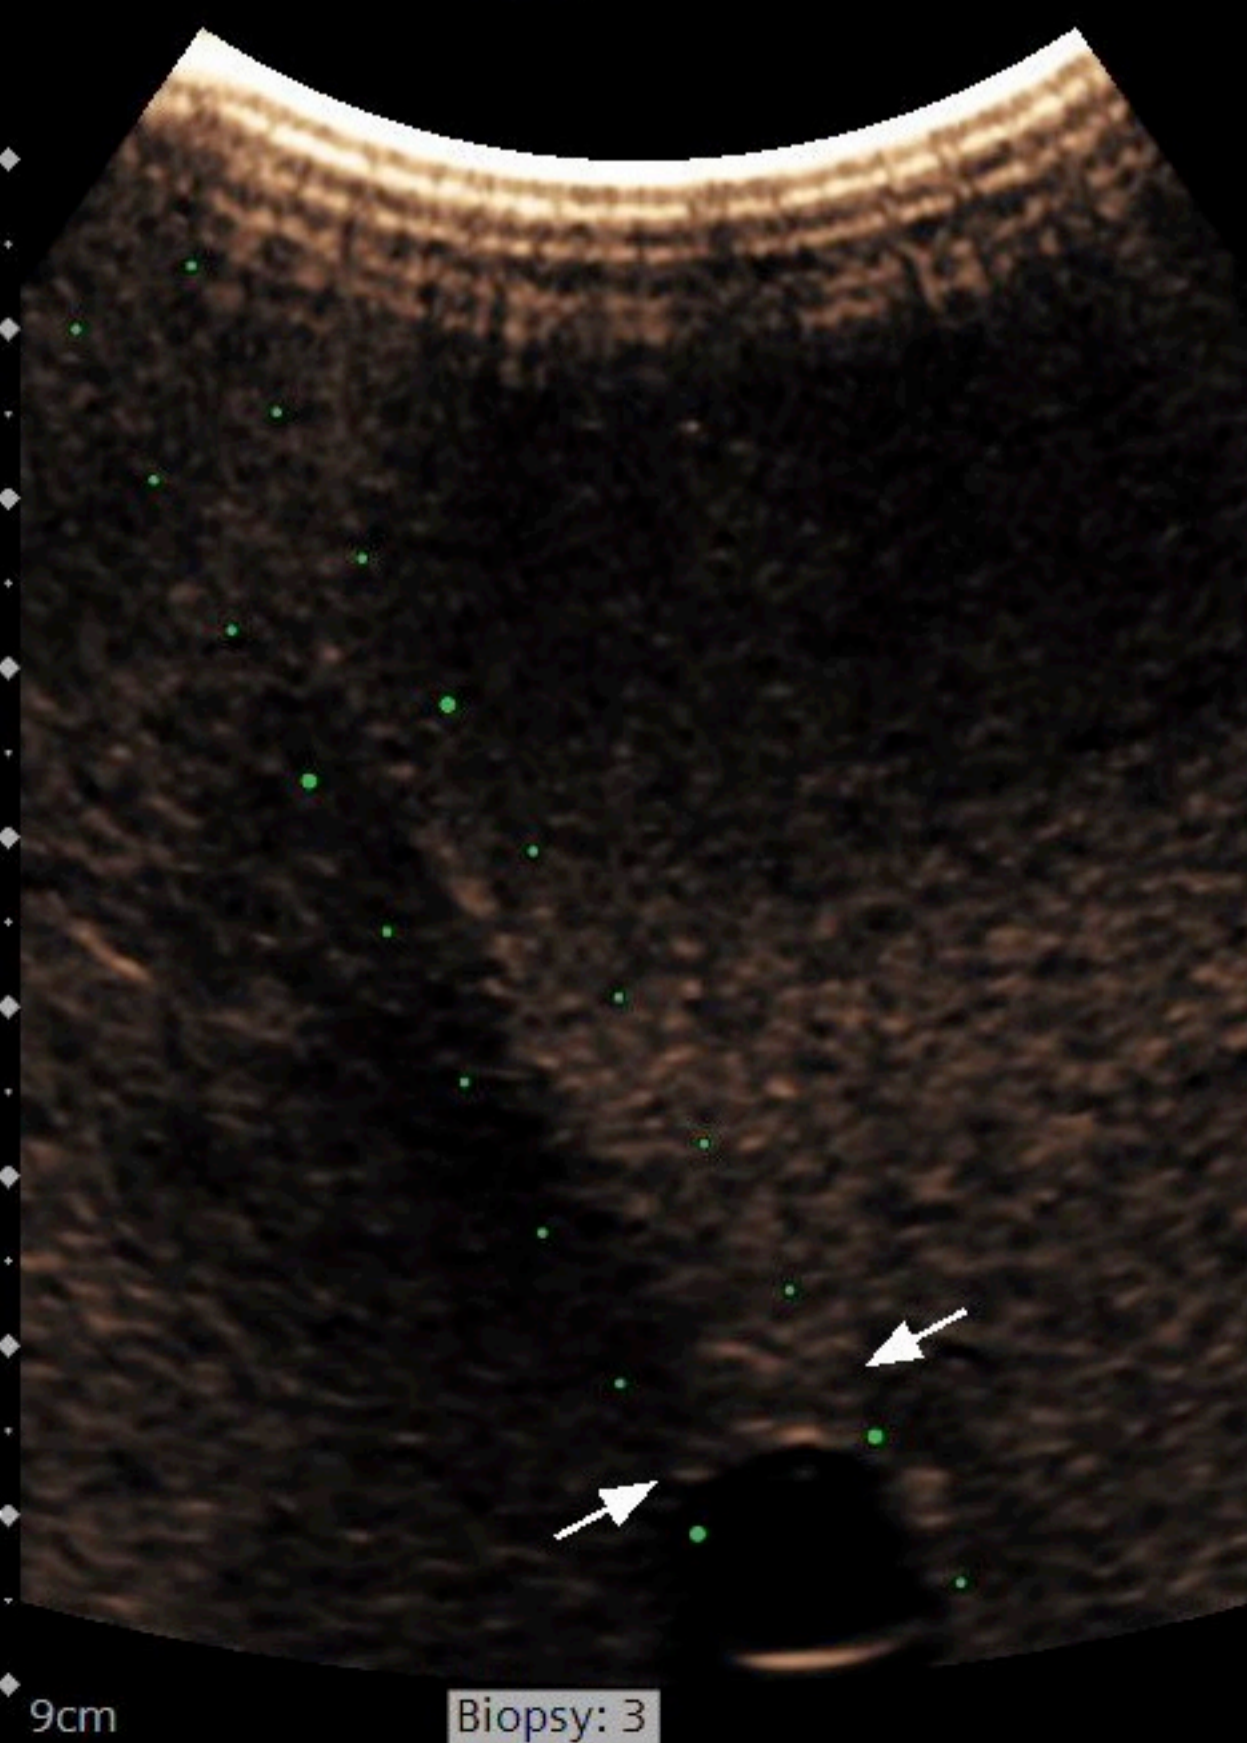

3rd puncture

Ultrasound contrast agent

Control



Full core biopsy needle (set 6/10)

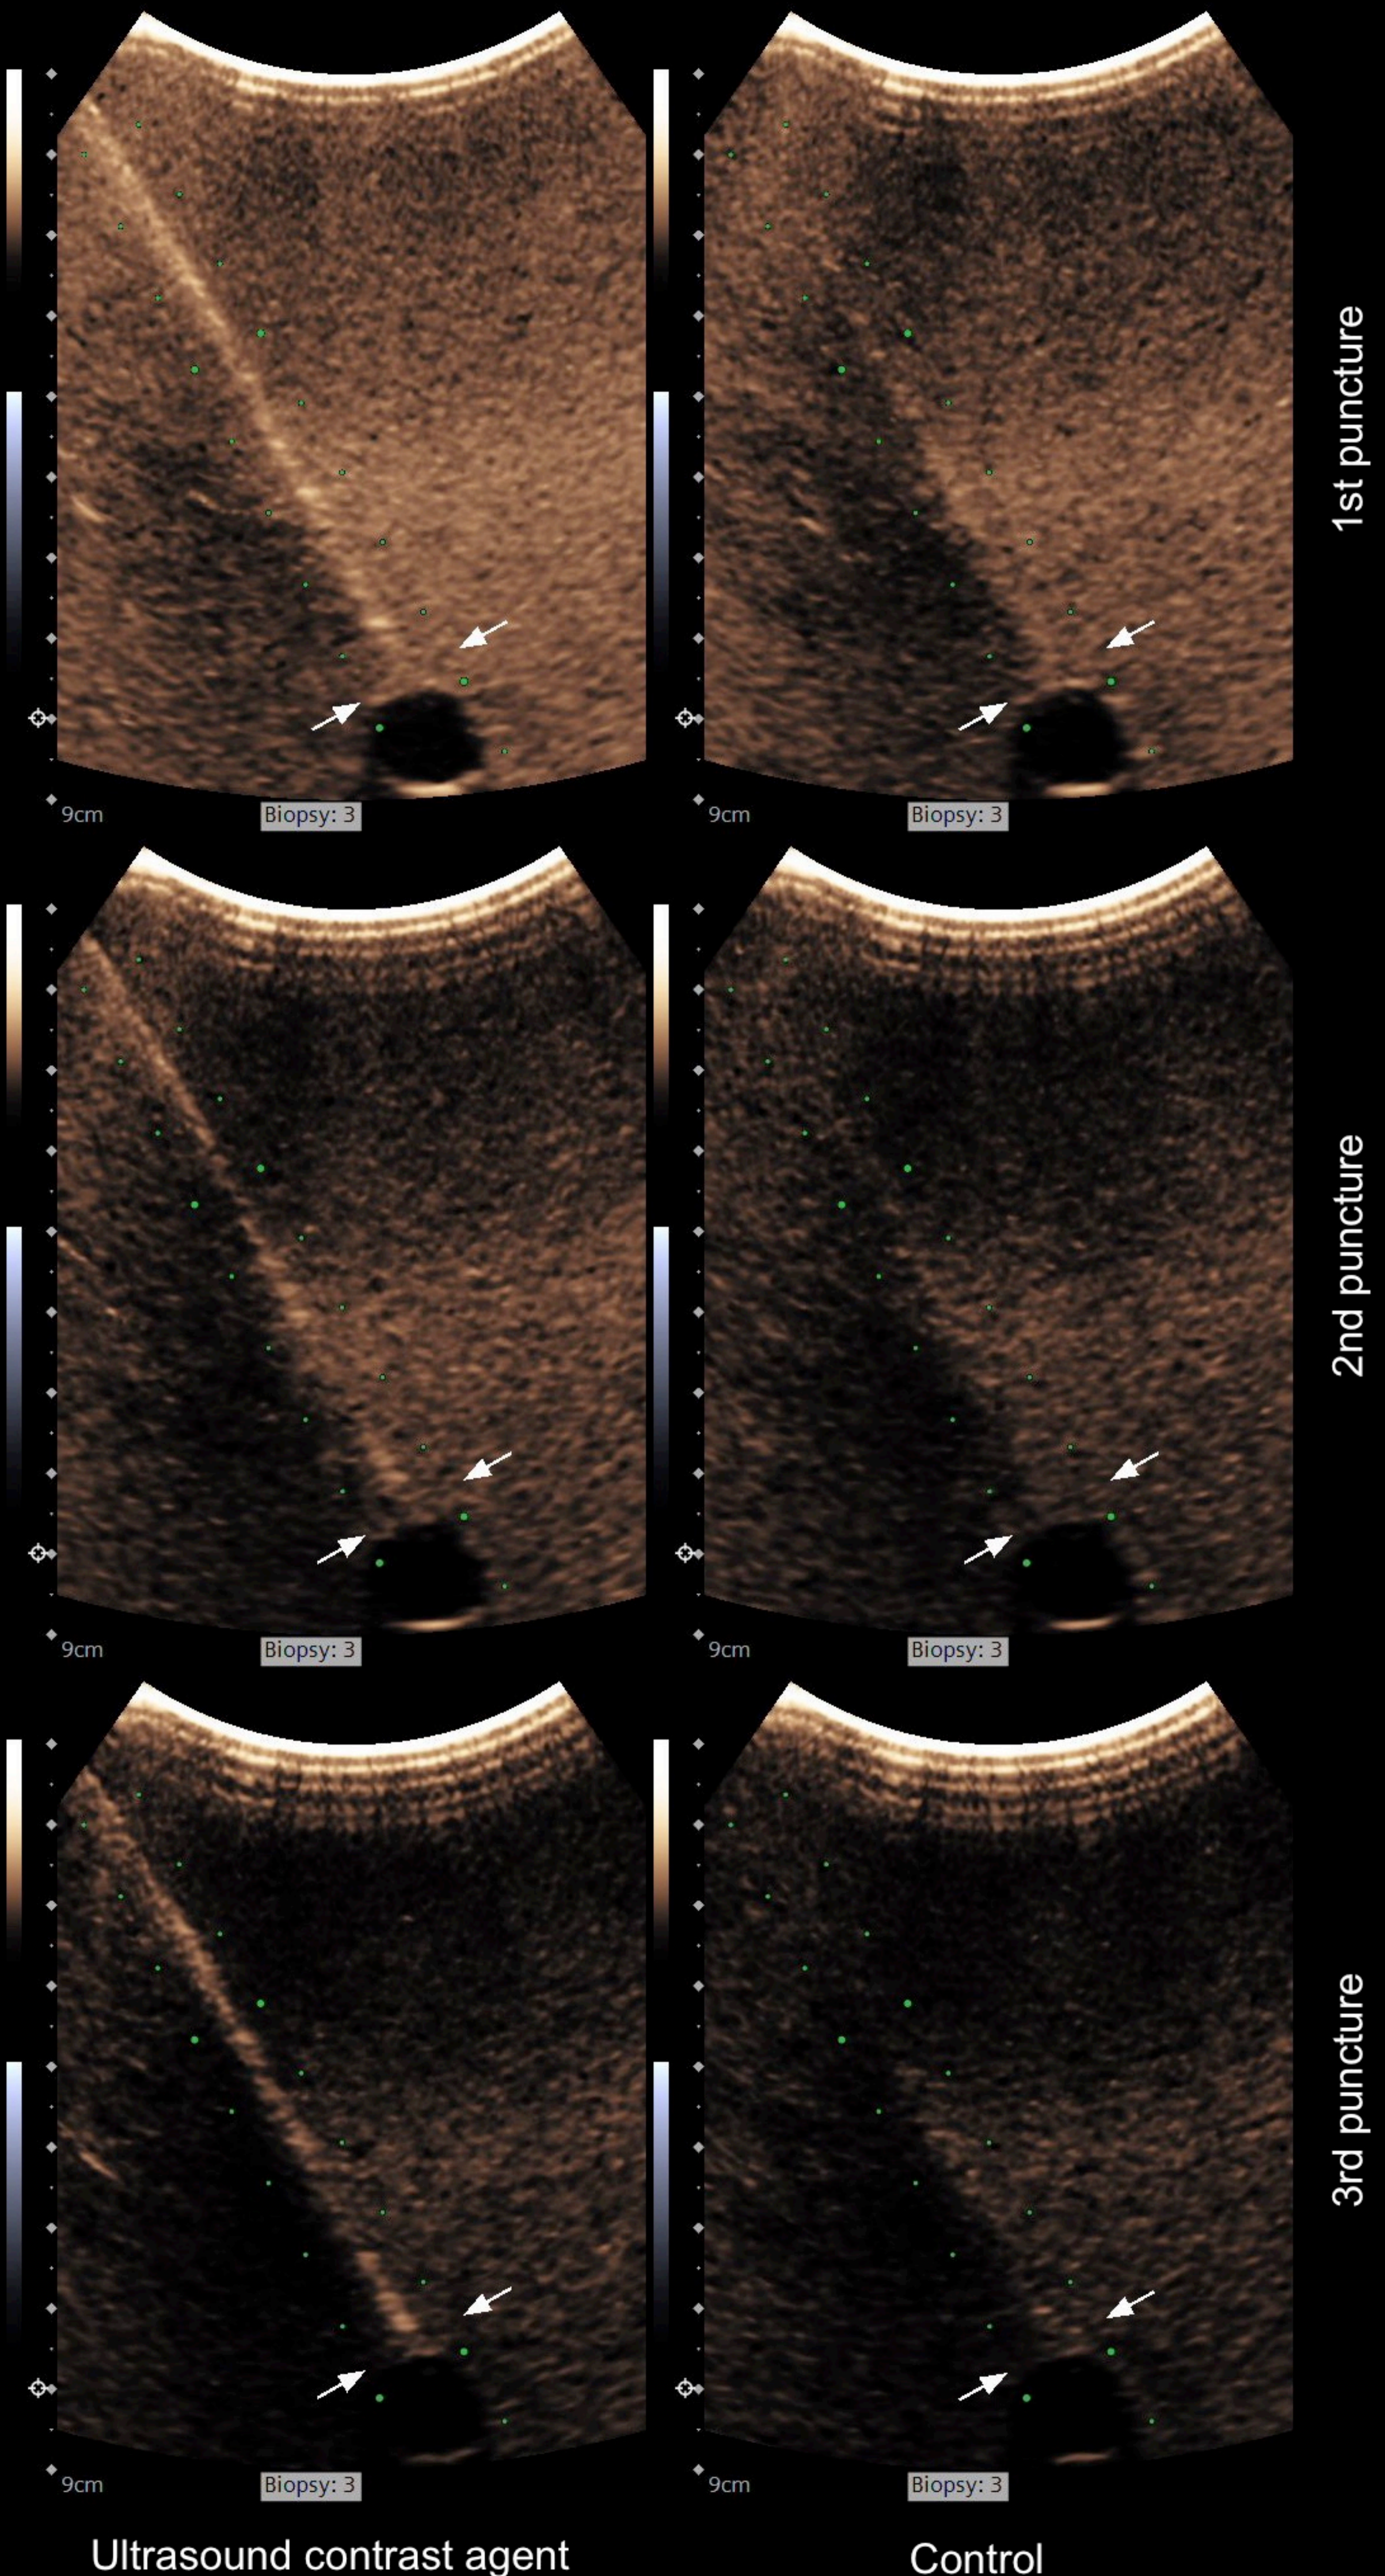

1st puncture

2nd puncture

3rd puncture

Ultrasound contrast agent

Control



Full core biopsy needle (set 7/10)

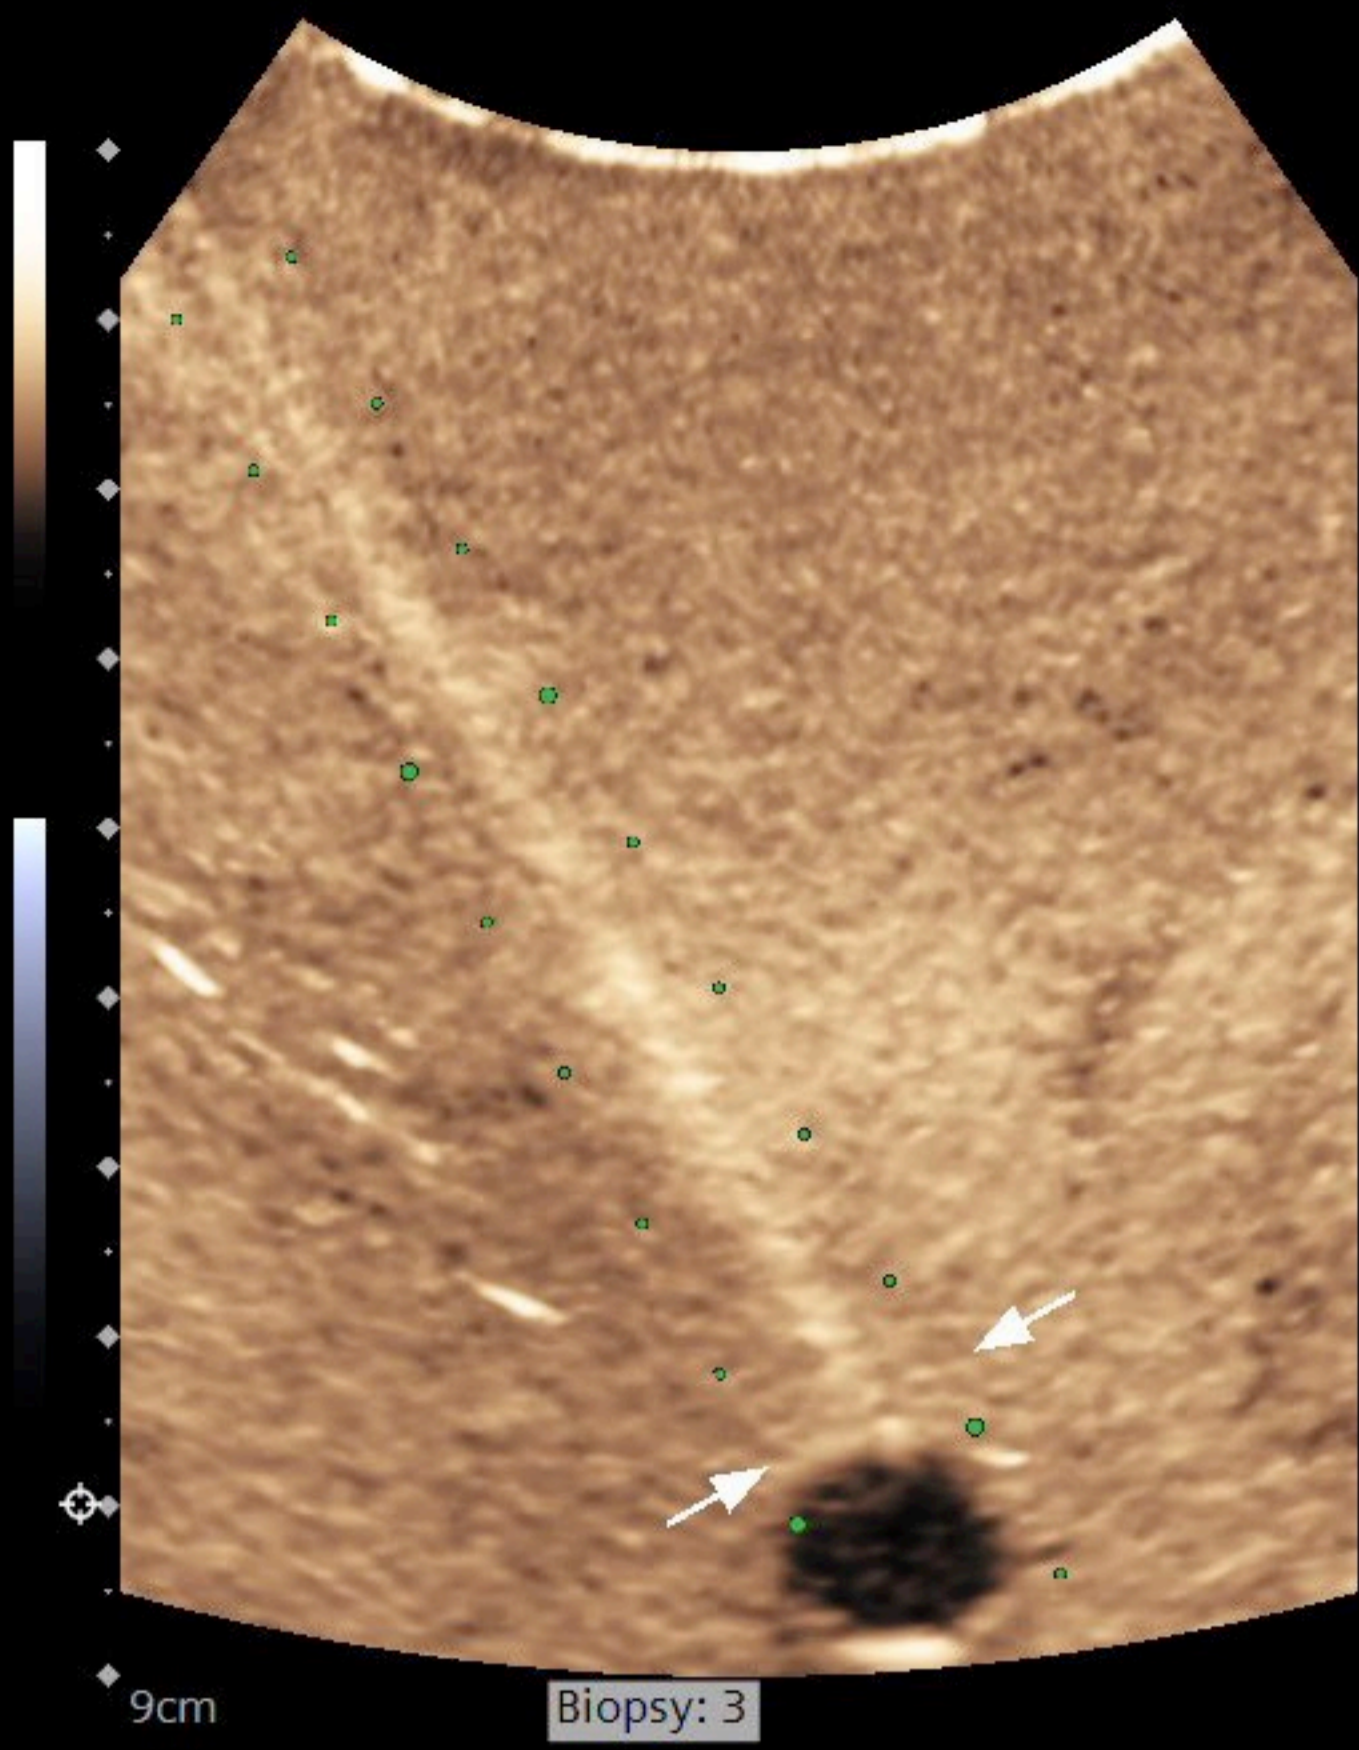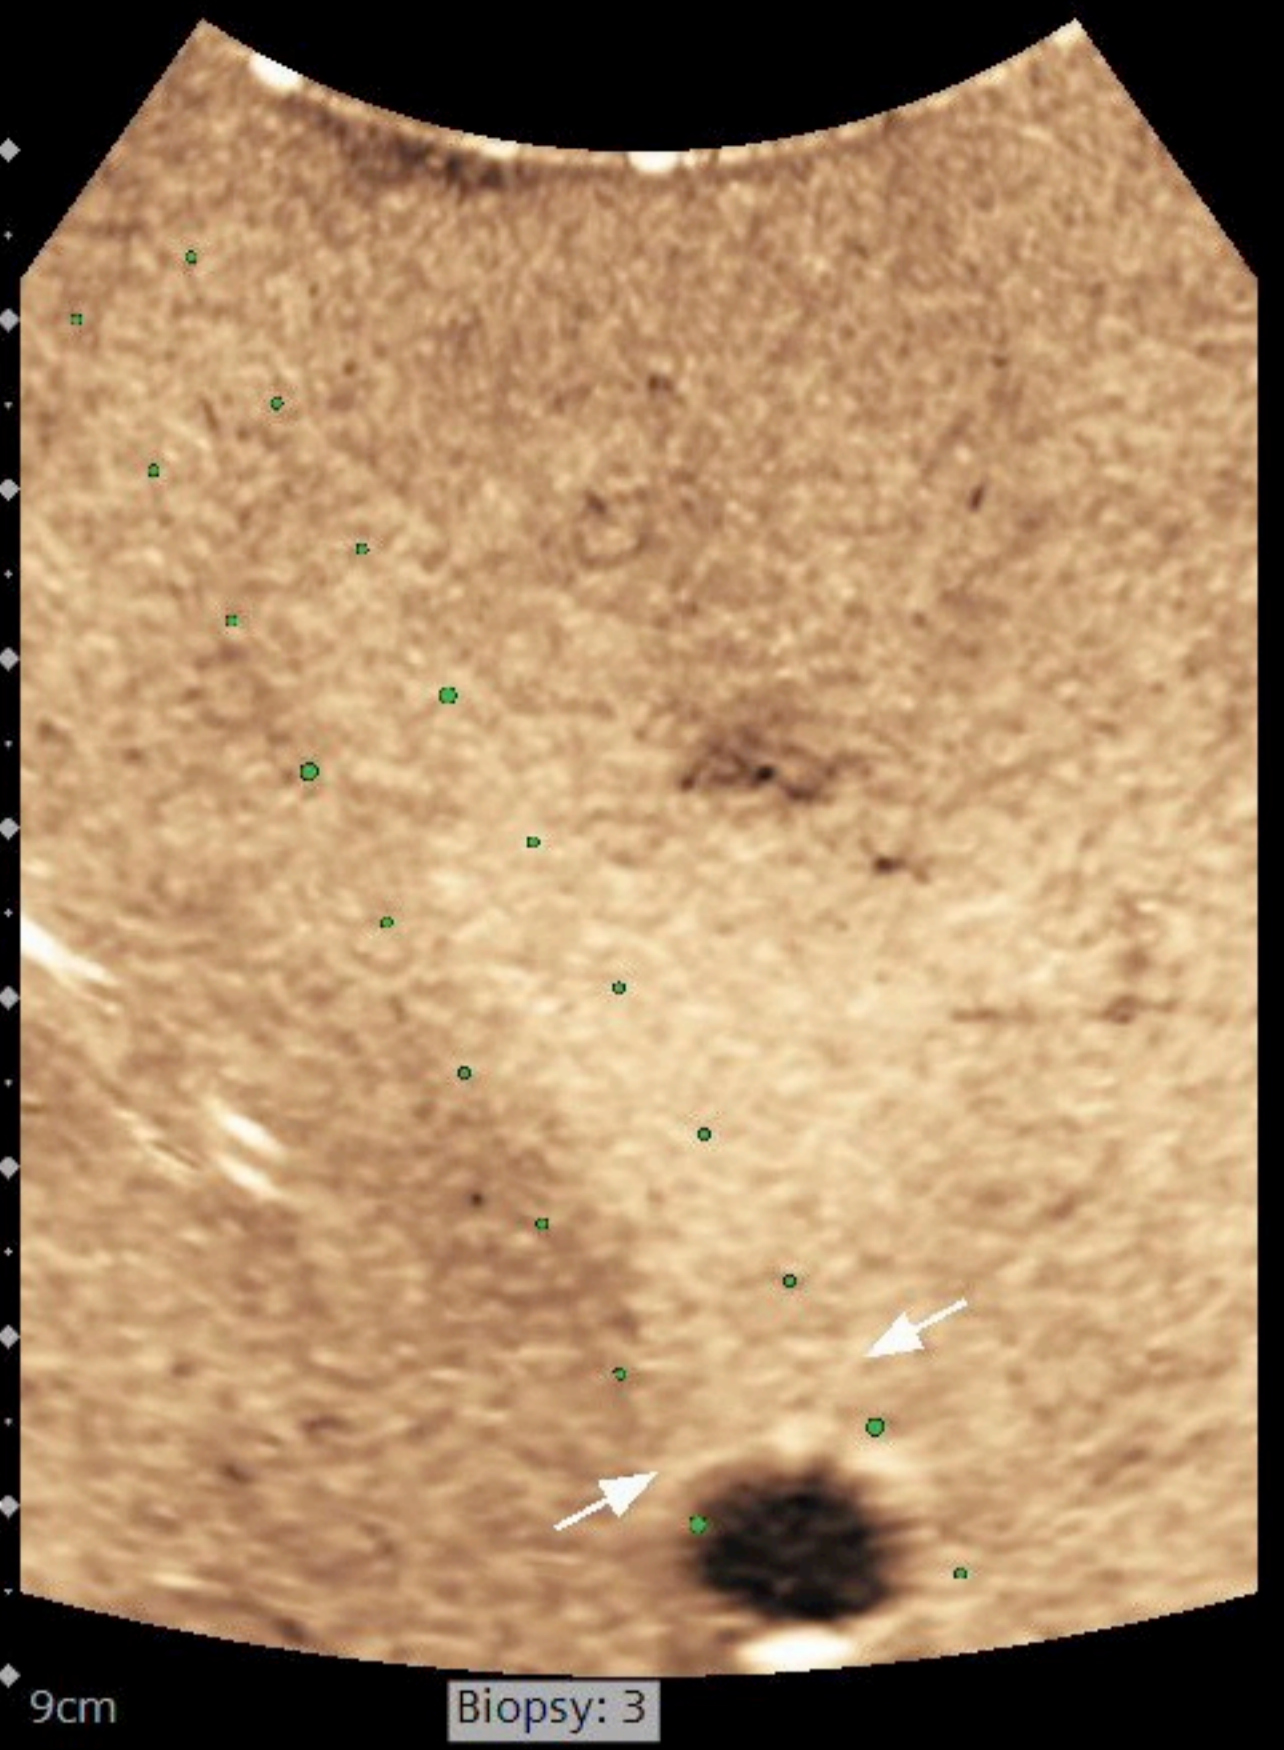

1st puncture

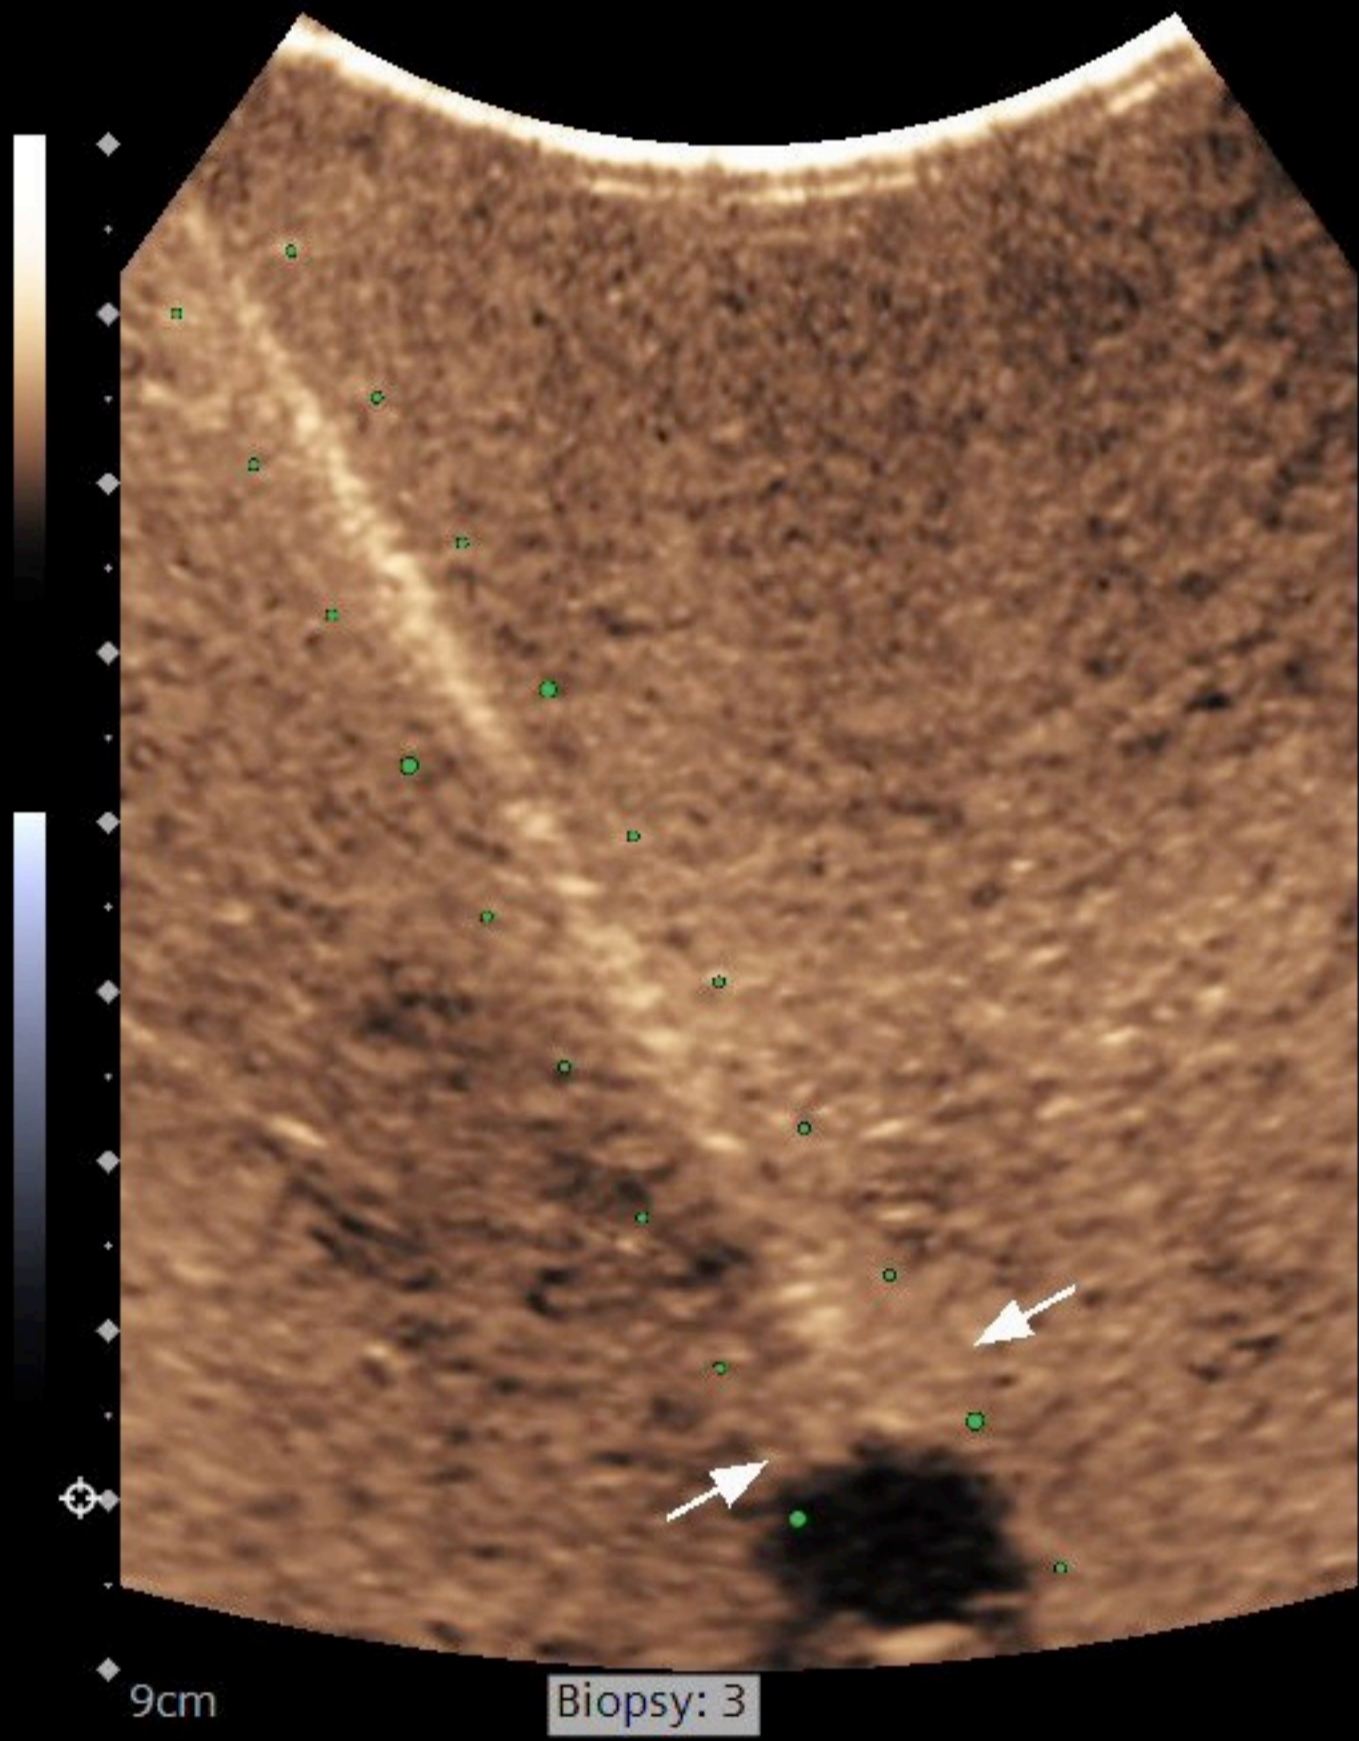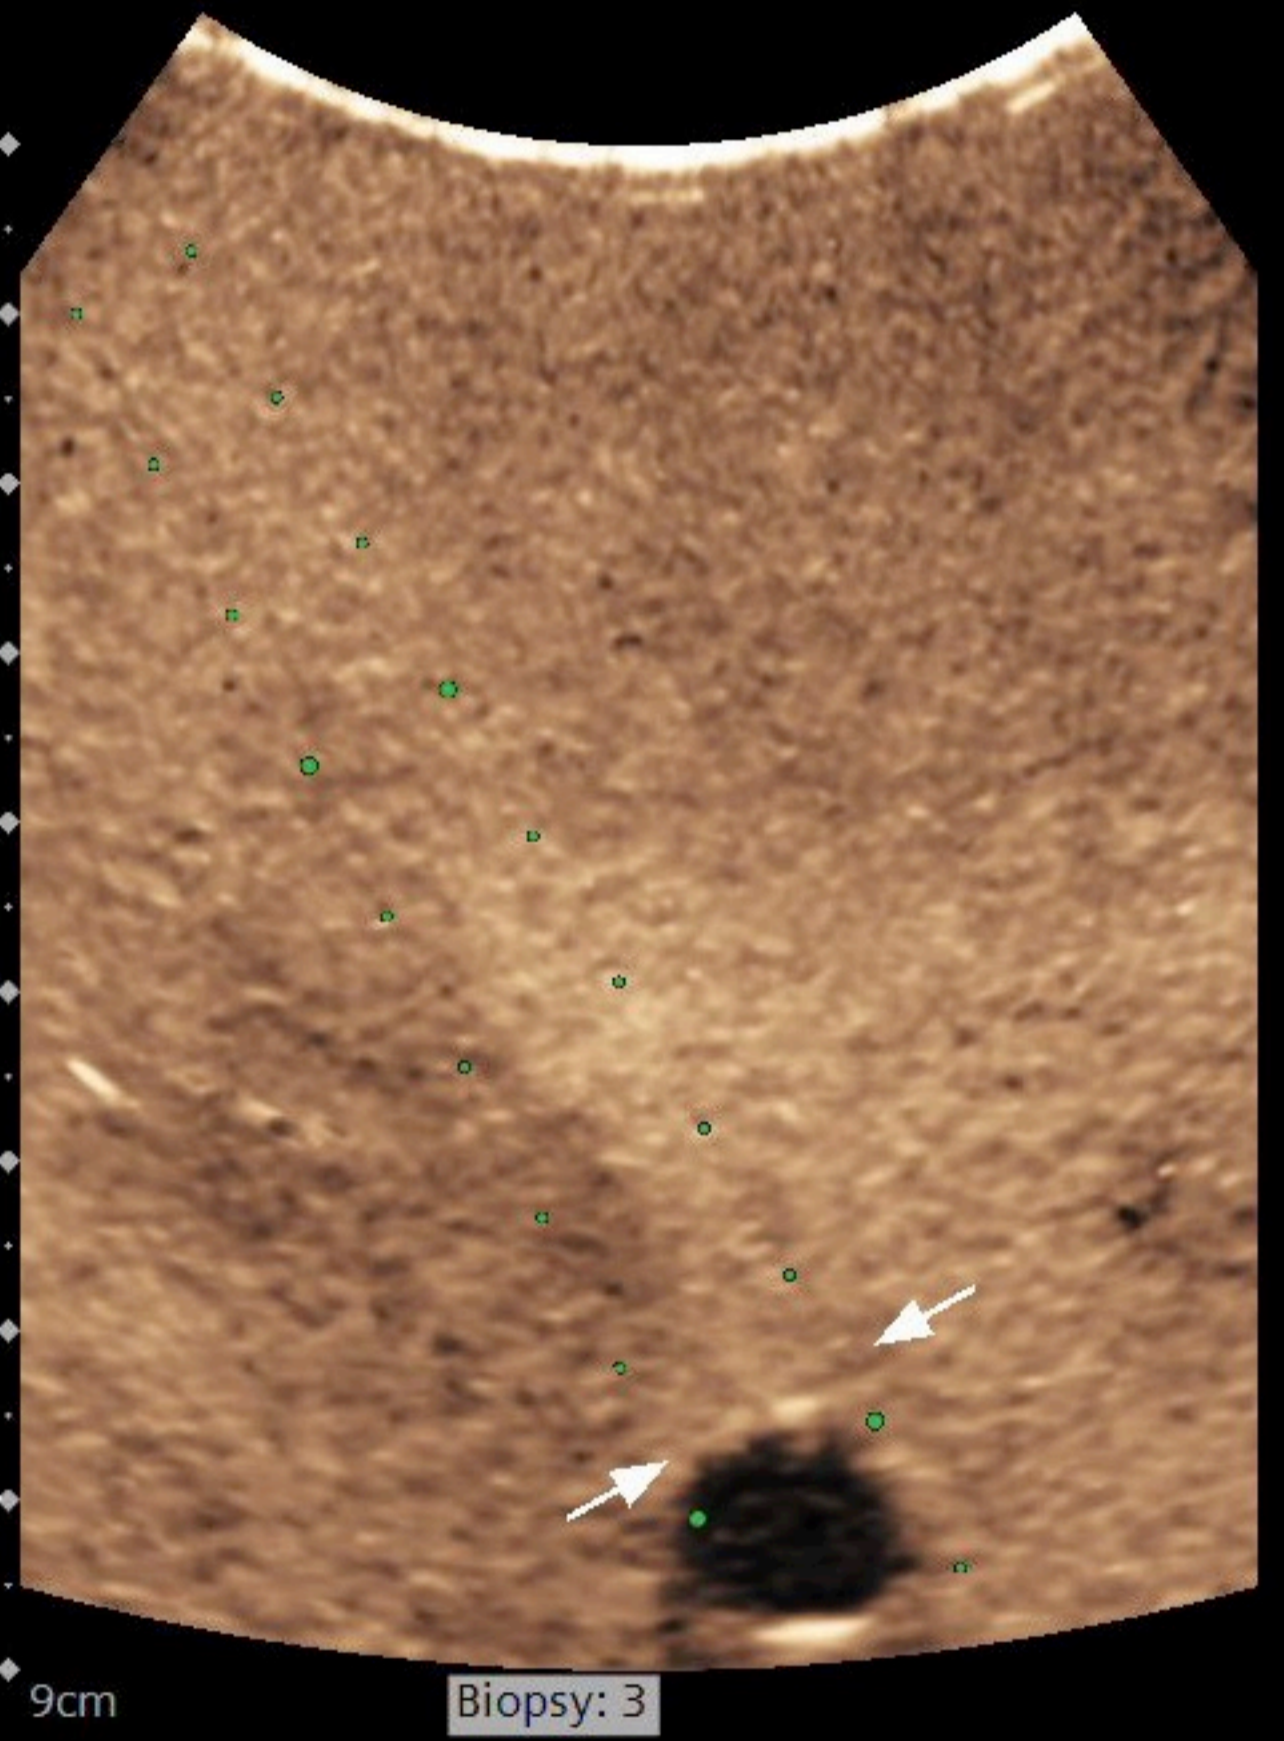

2nd puncture

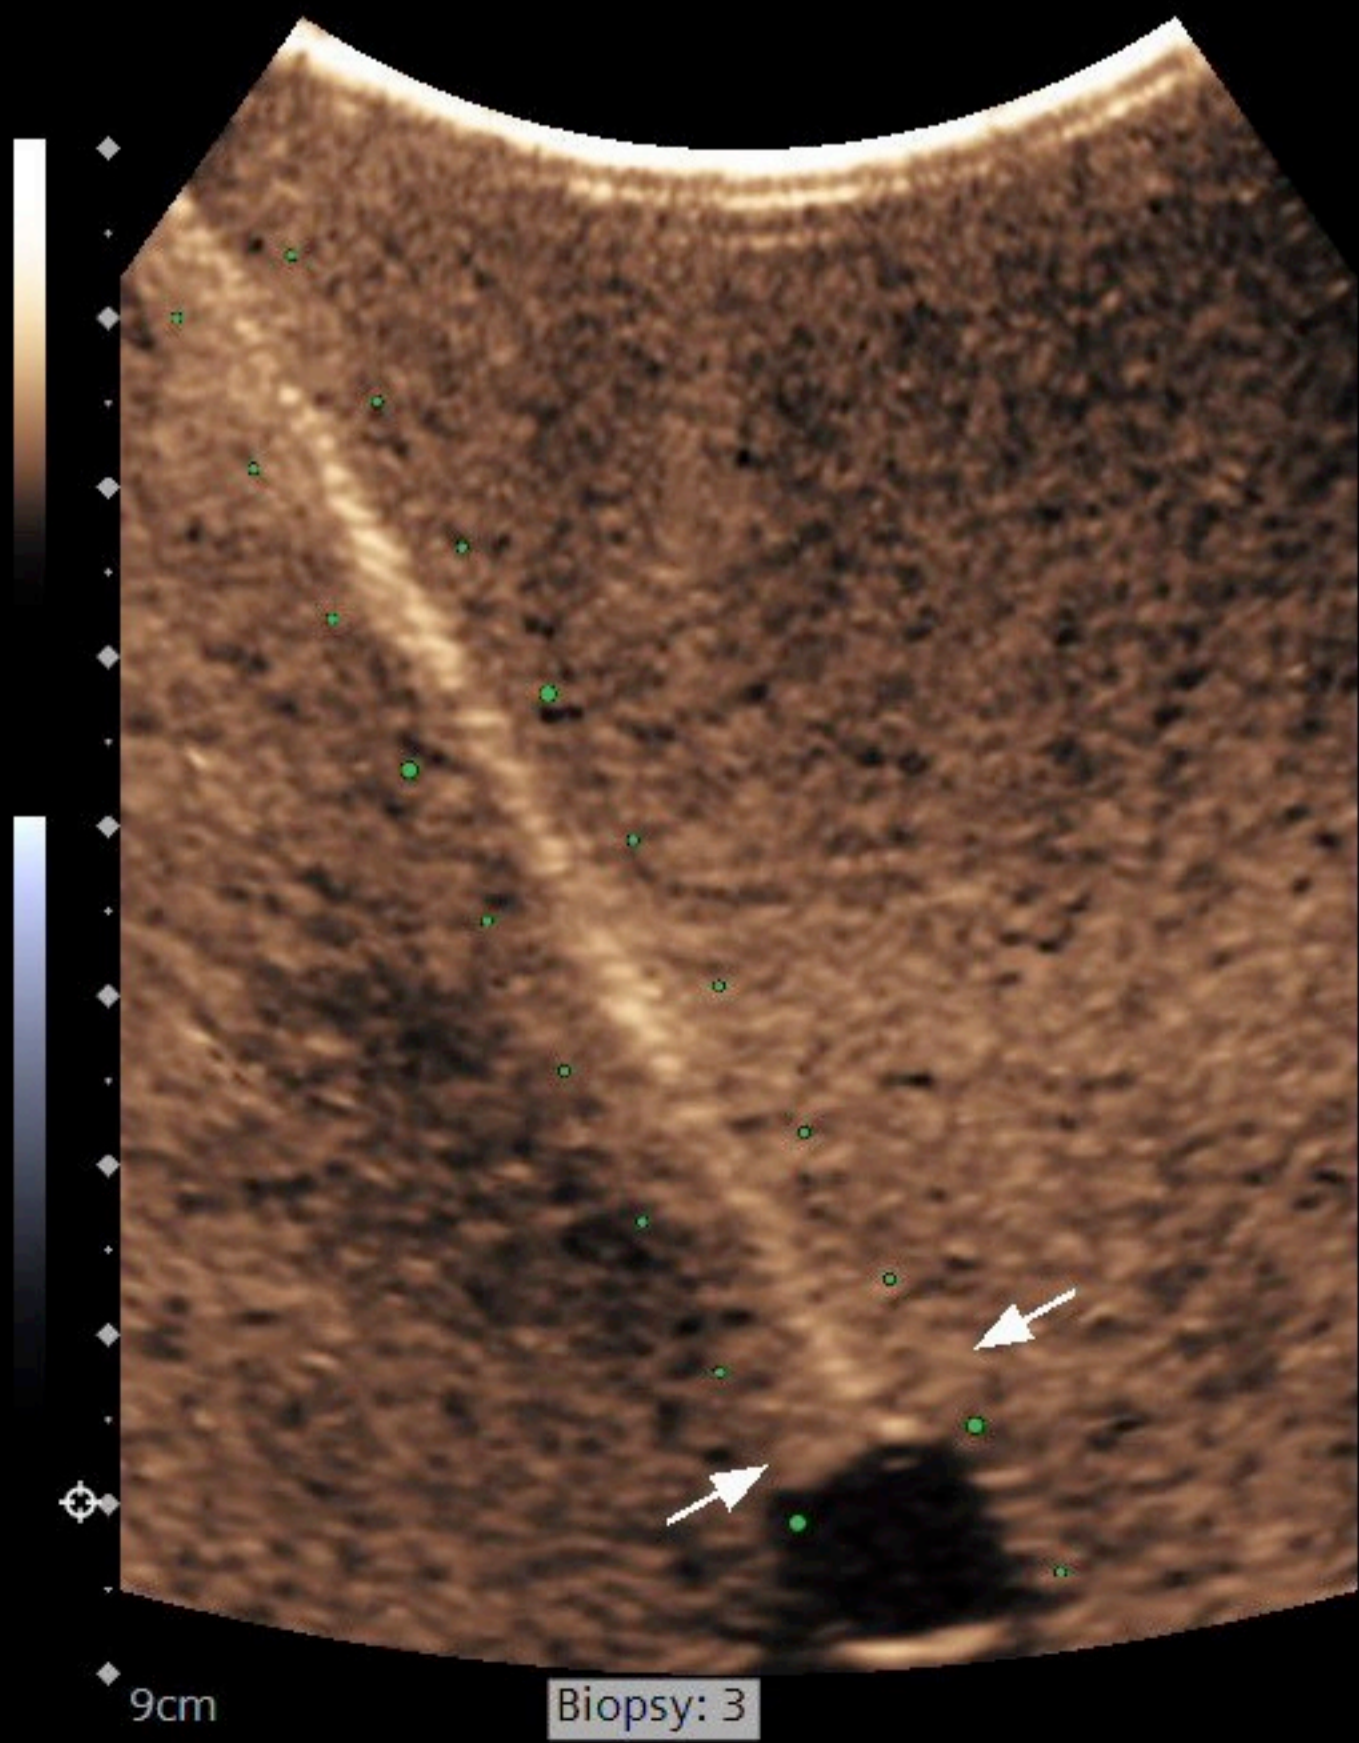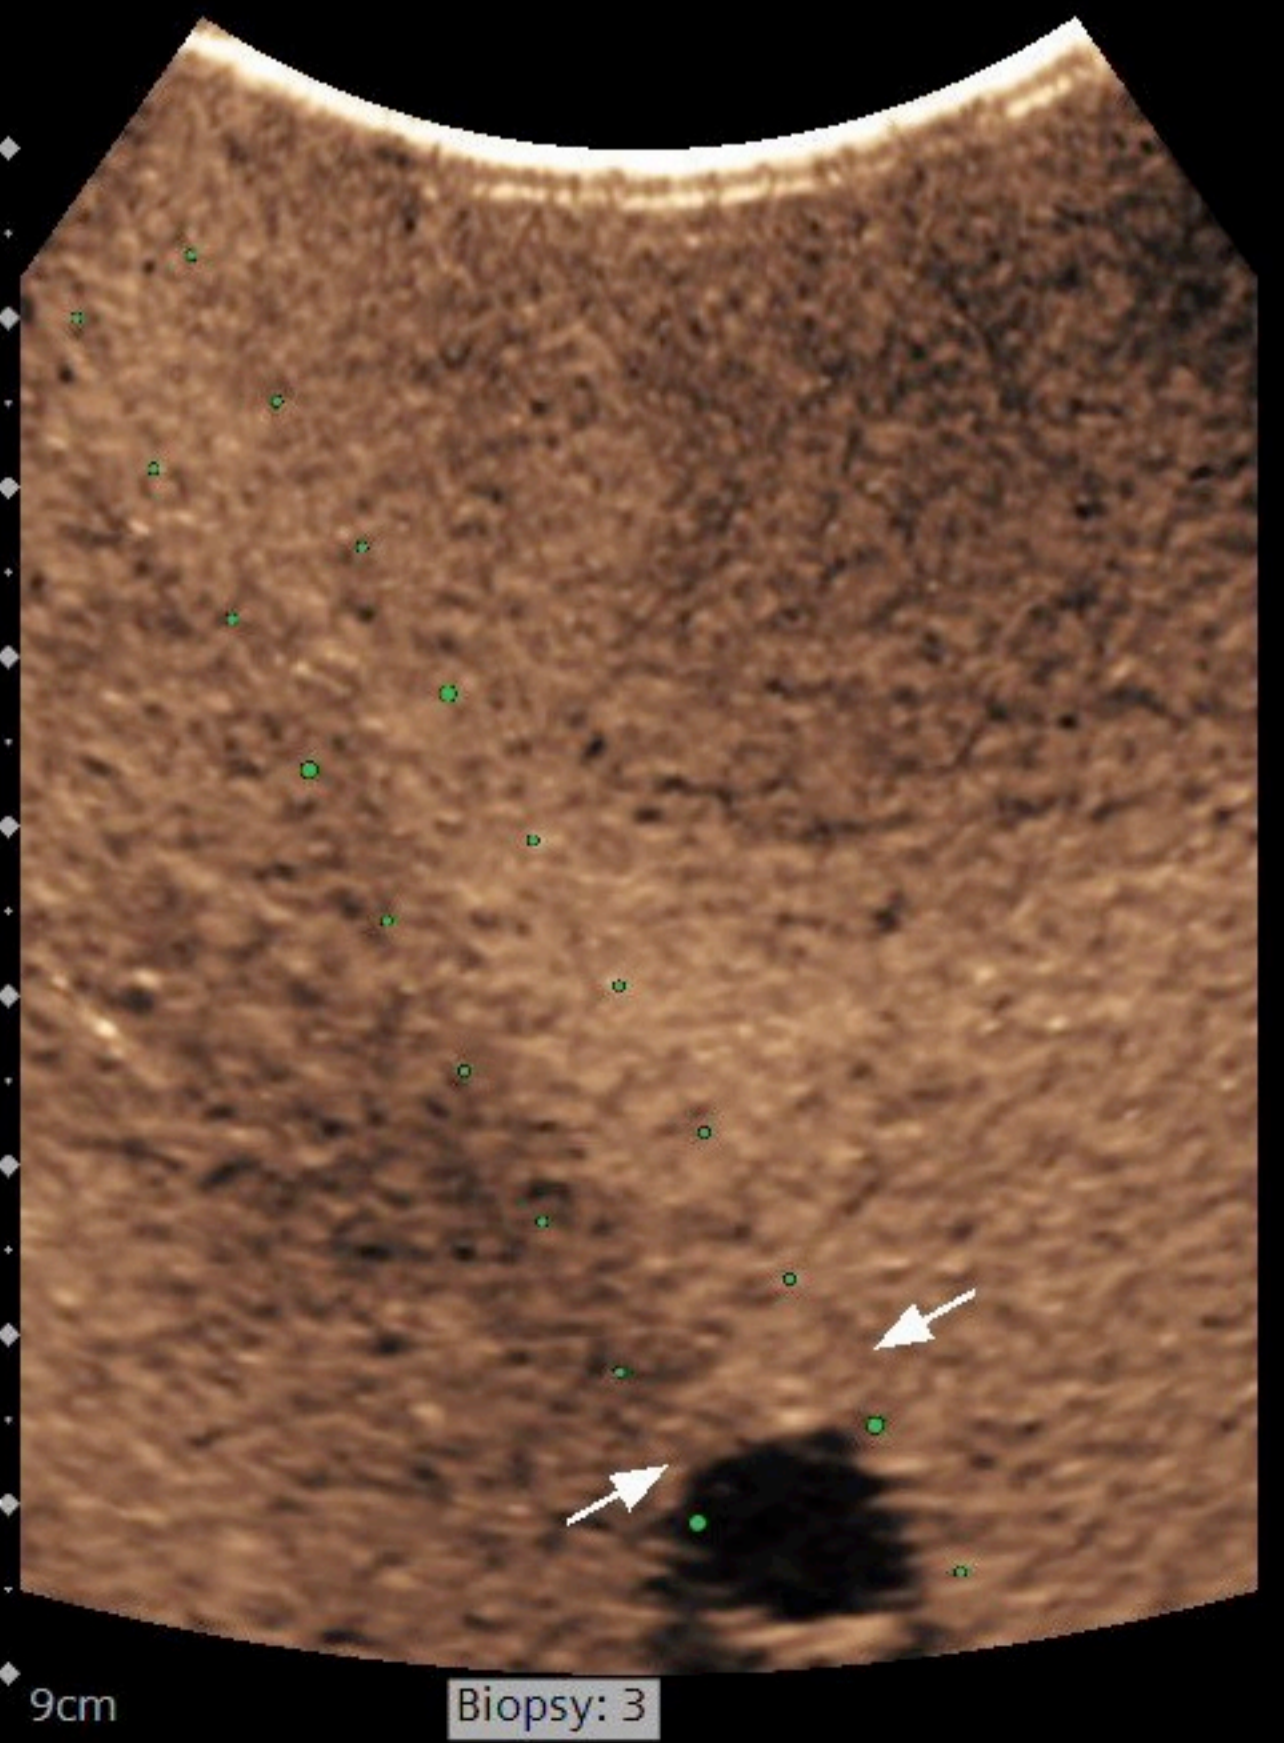

3rd puncture

Ultrasound contrast agent

Control



Full core biopsy needle (set 8/10)

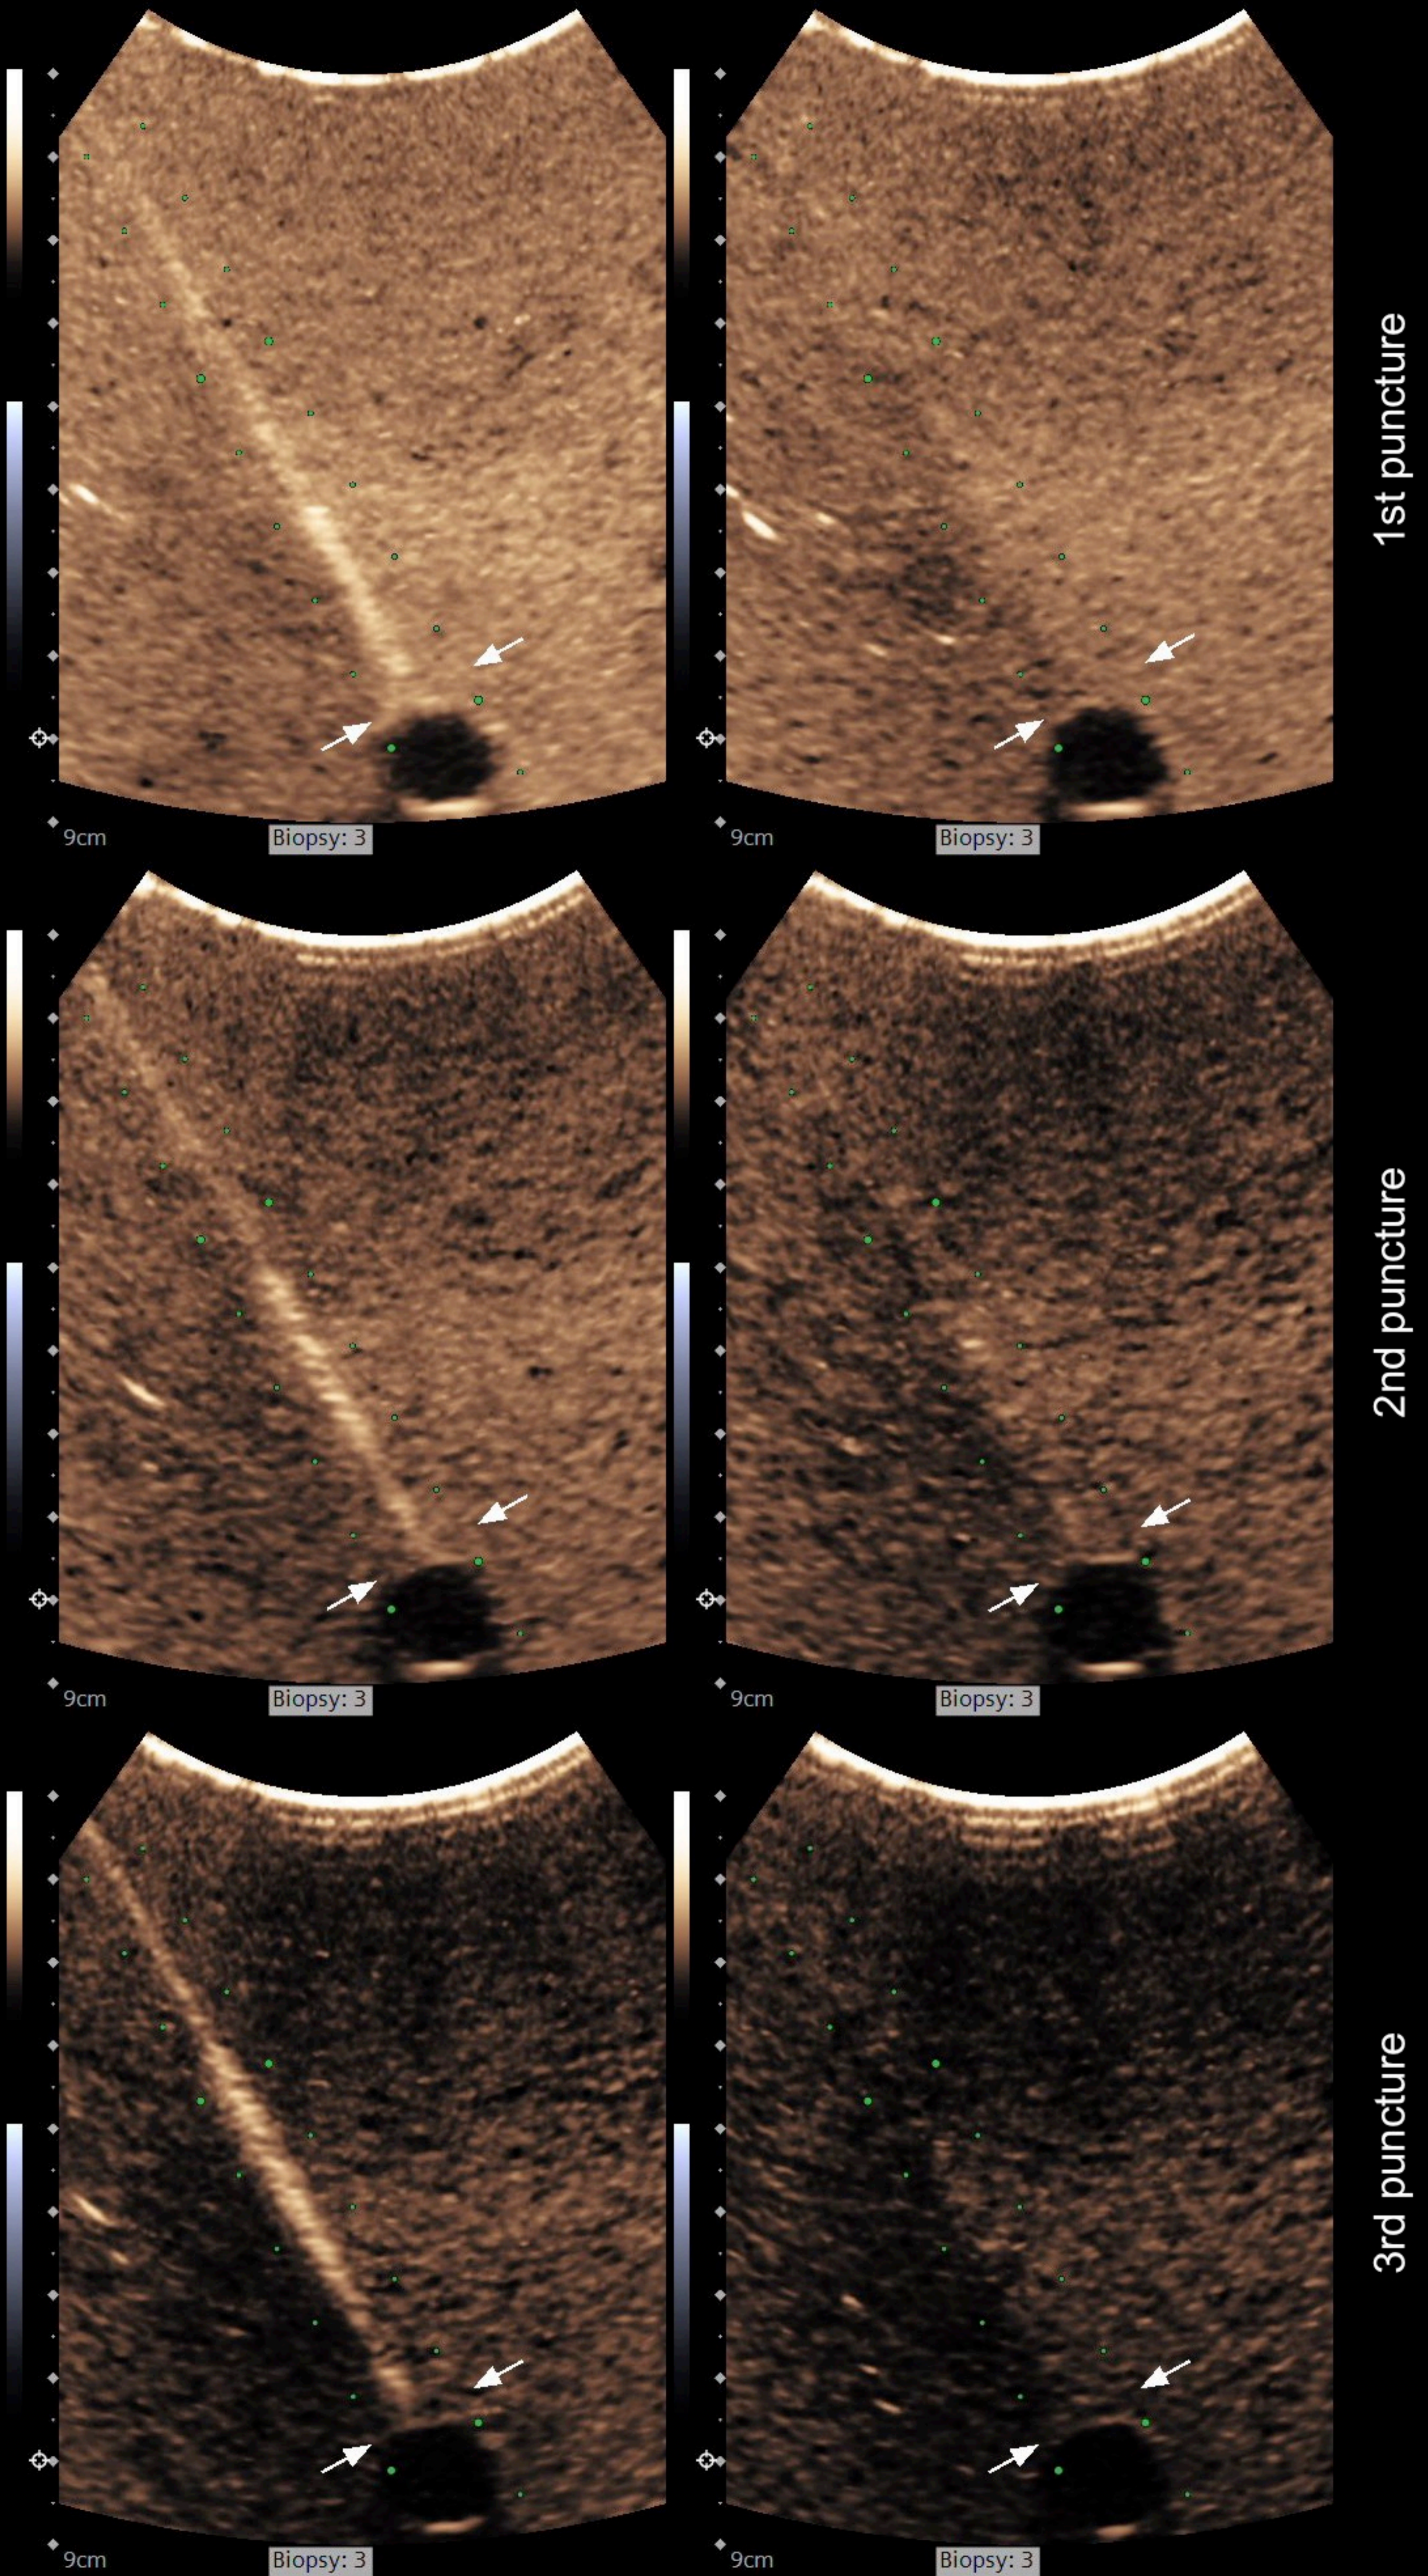

Ultrasound contrast agent

Control



Full core biopsy needle (set 9/10)

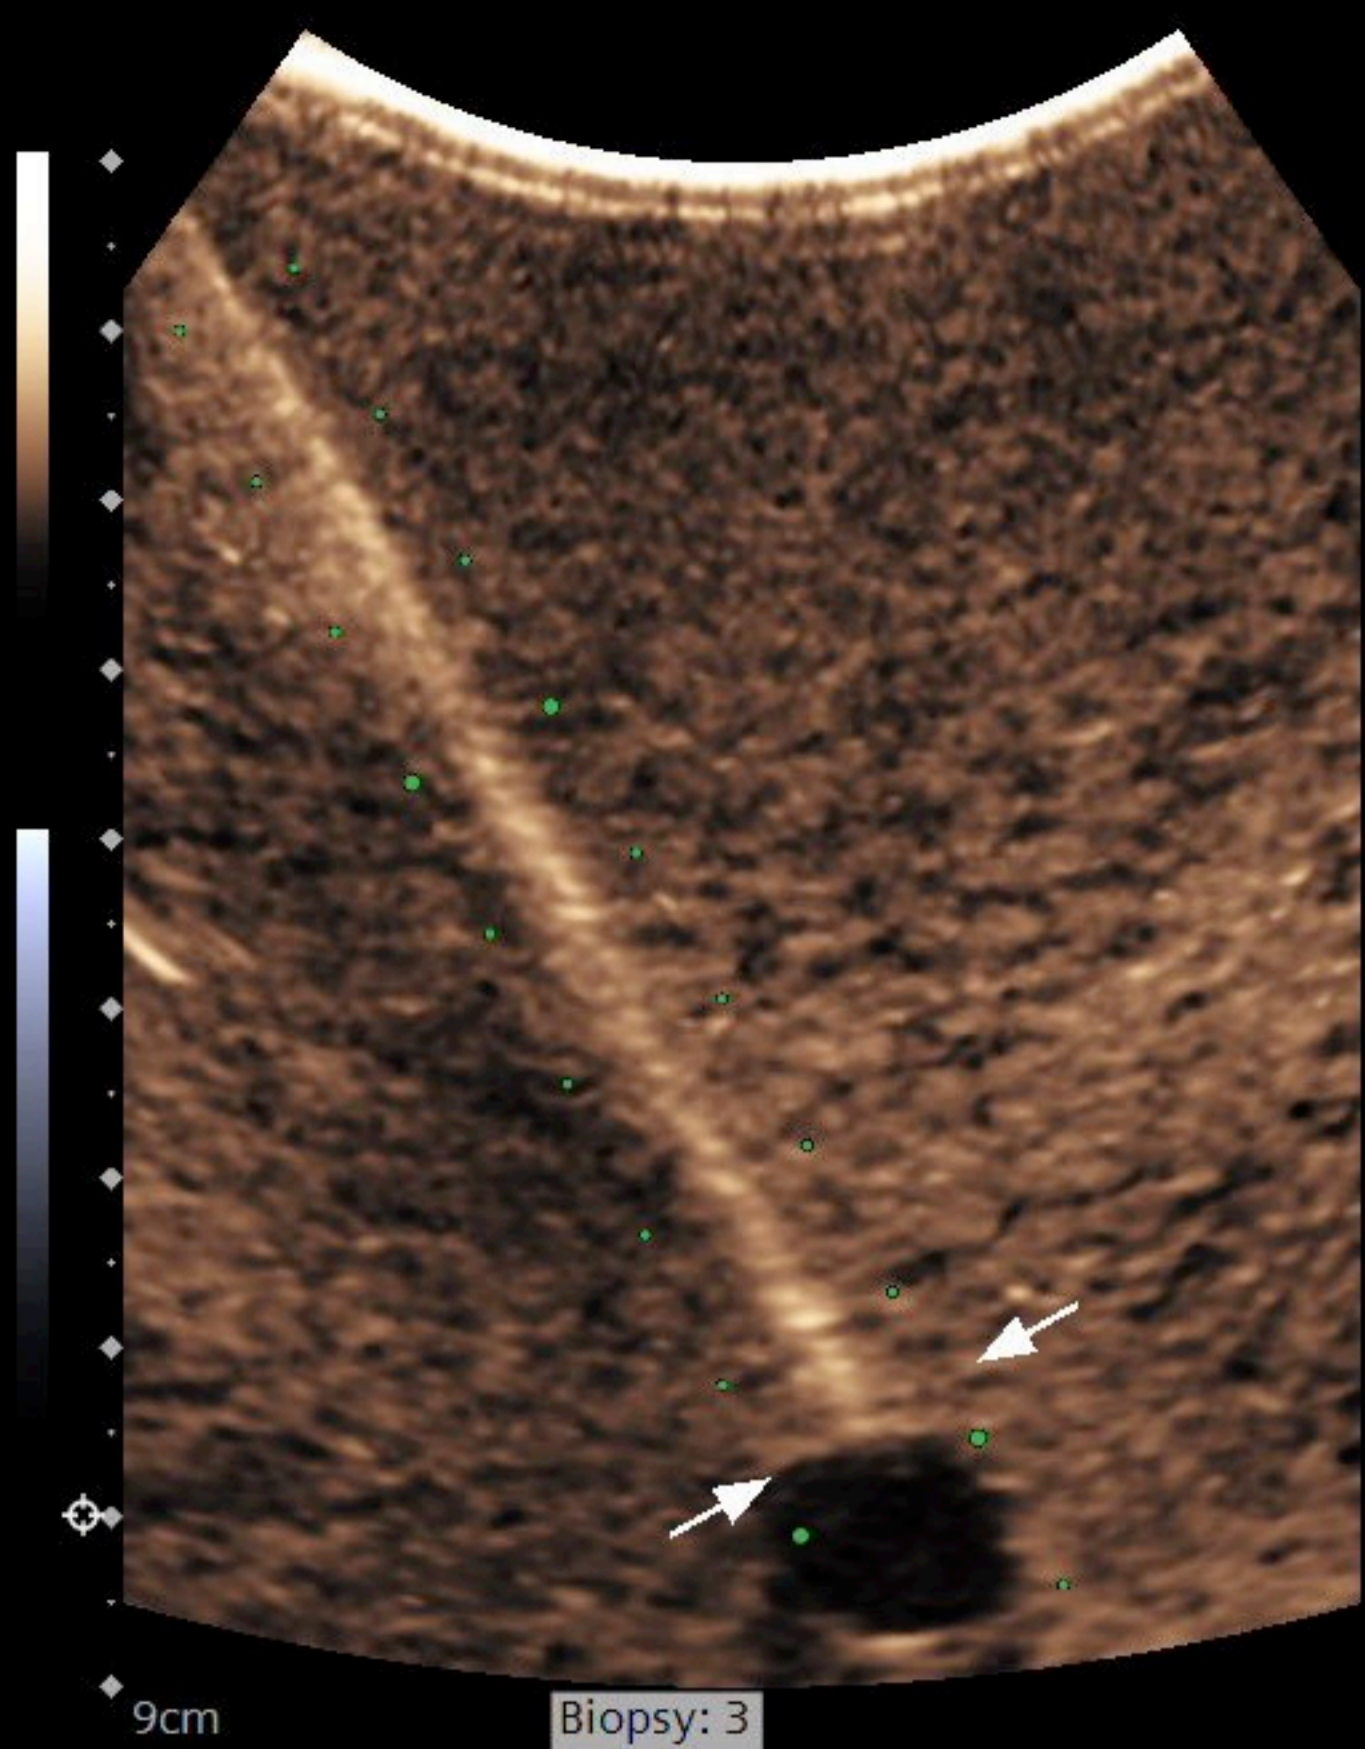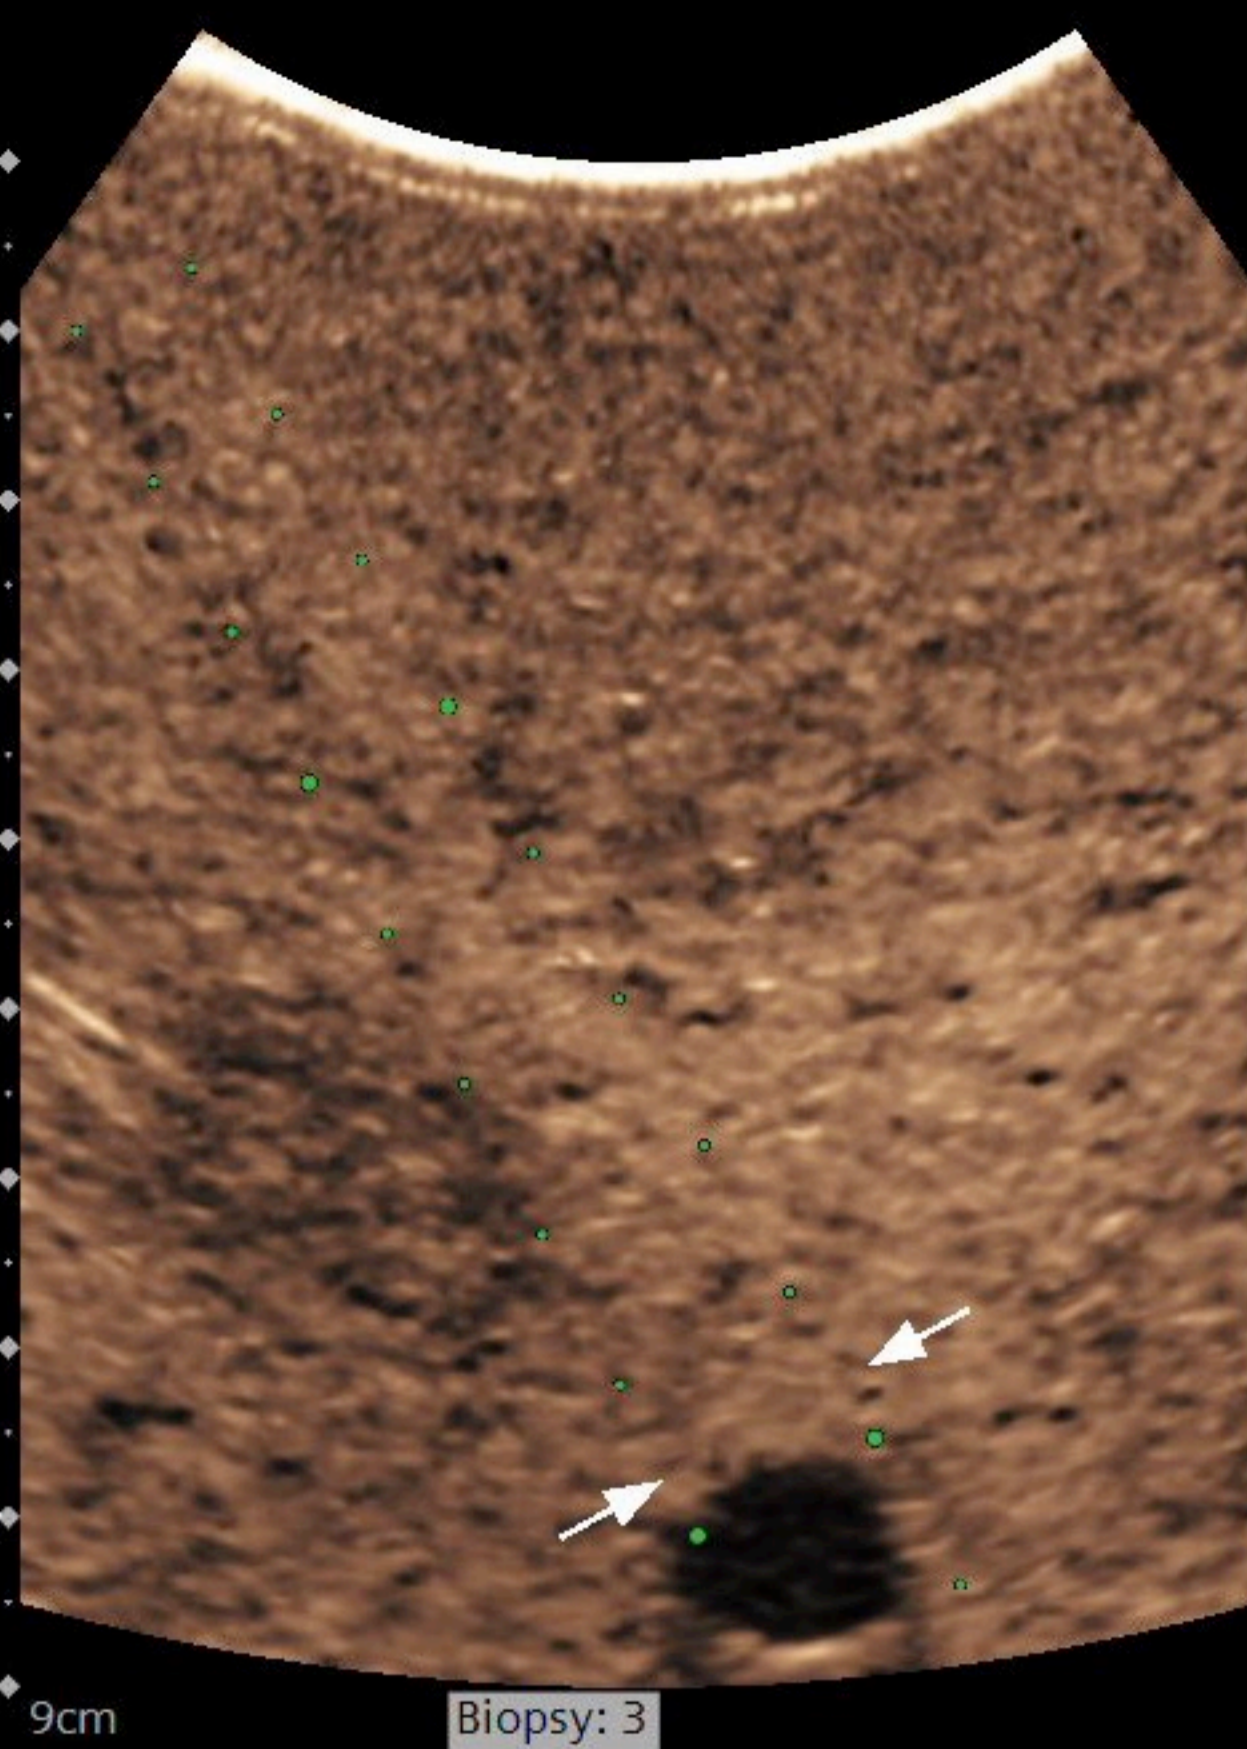

1st puncture

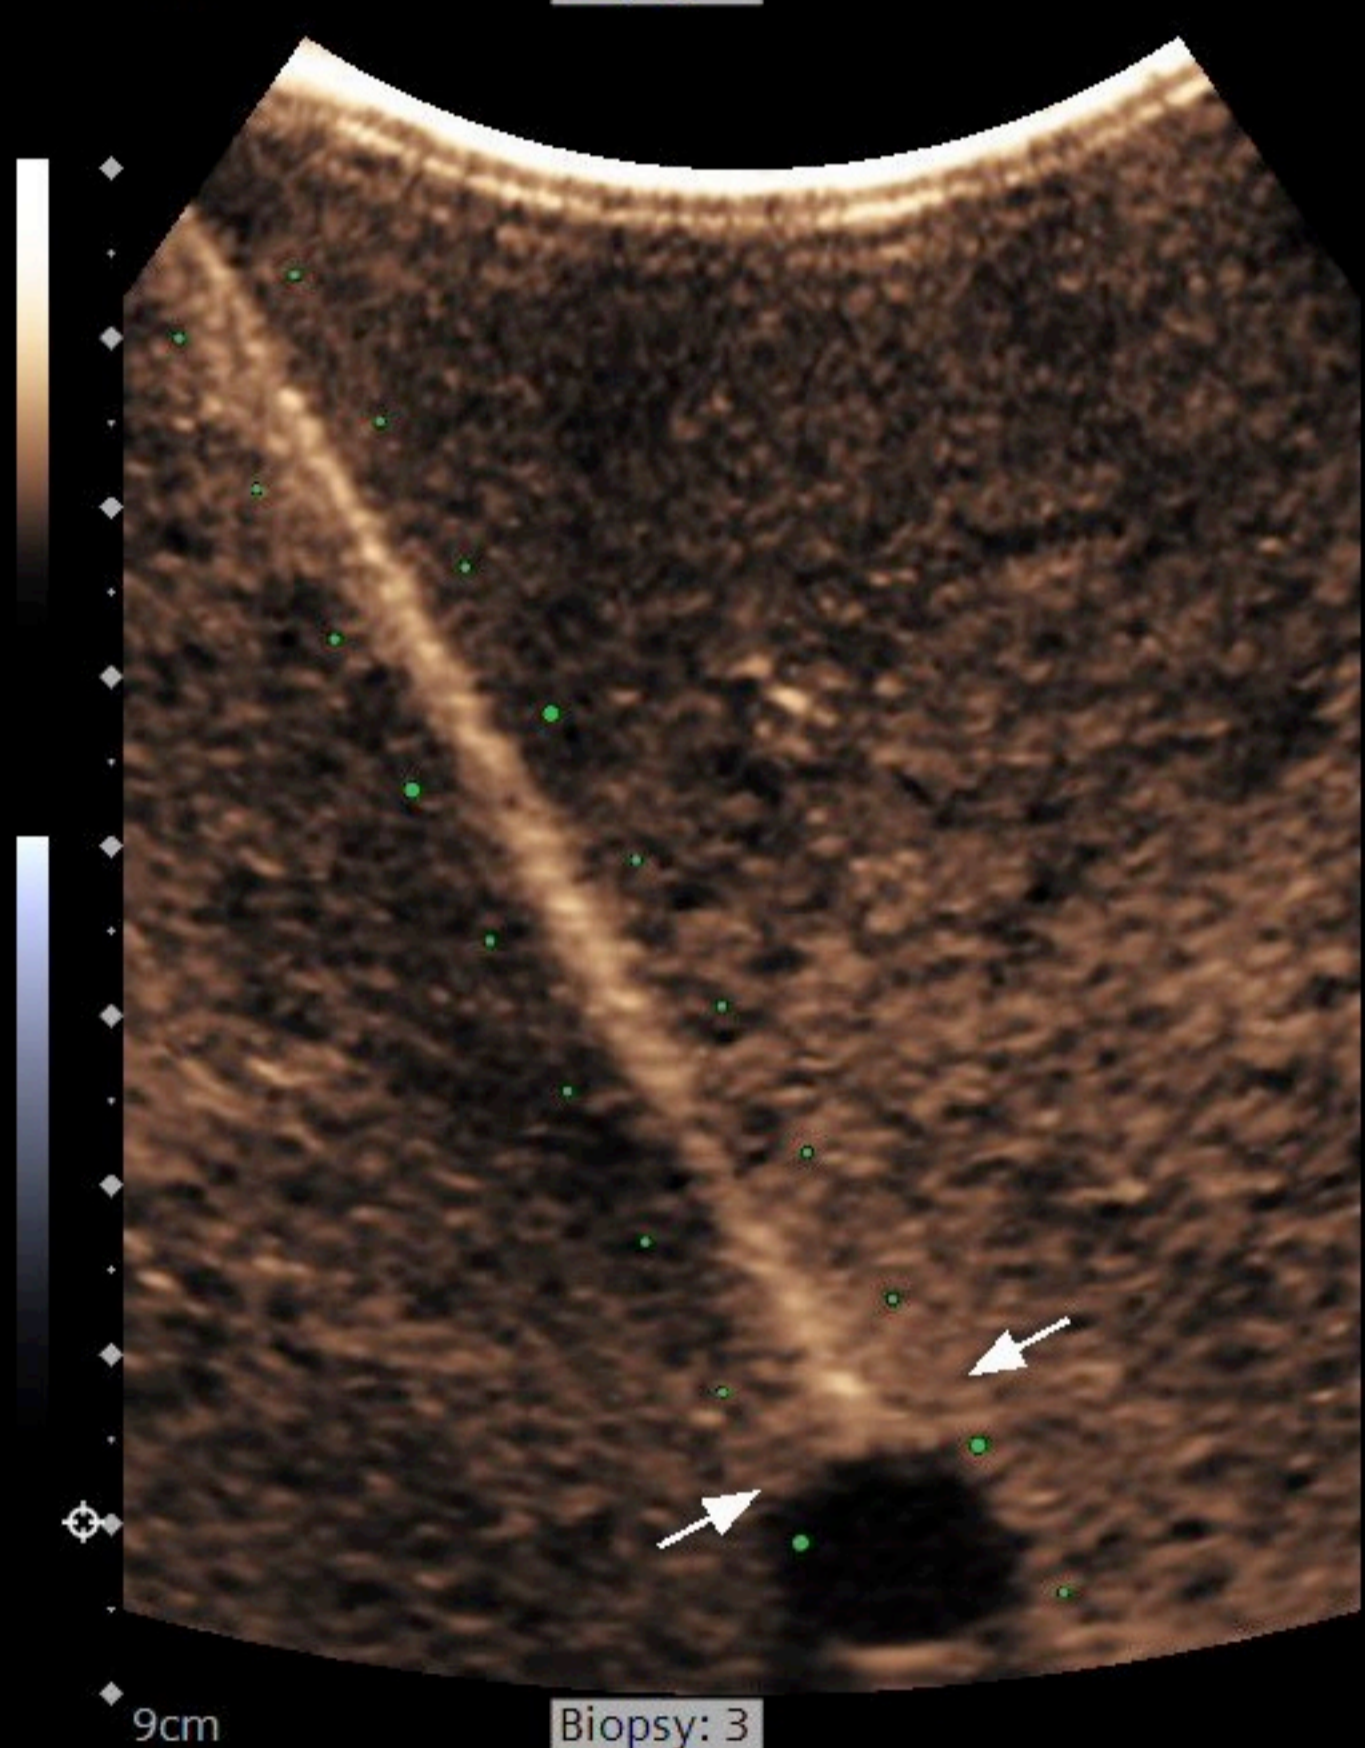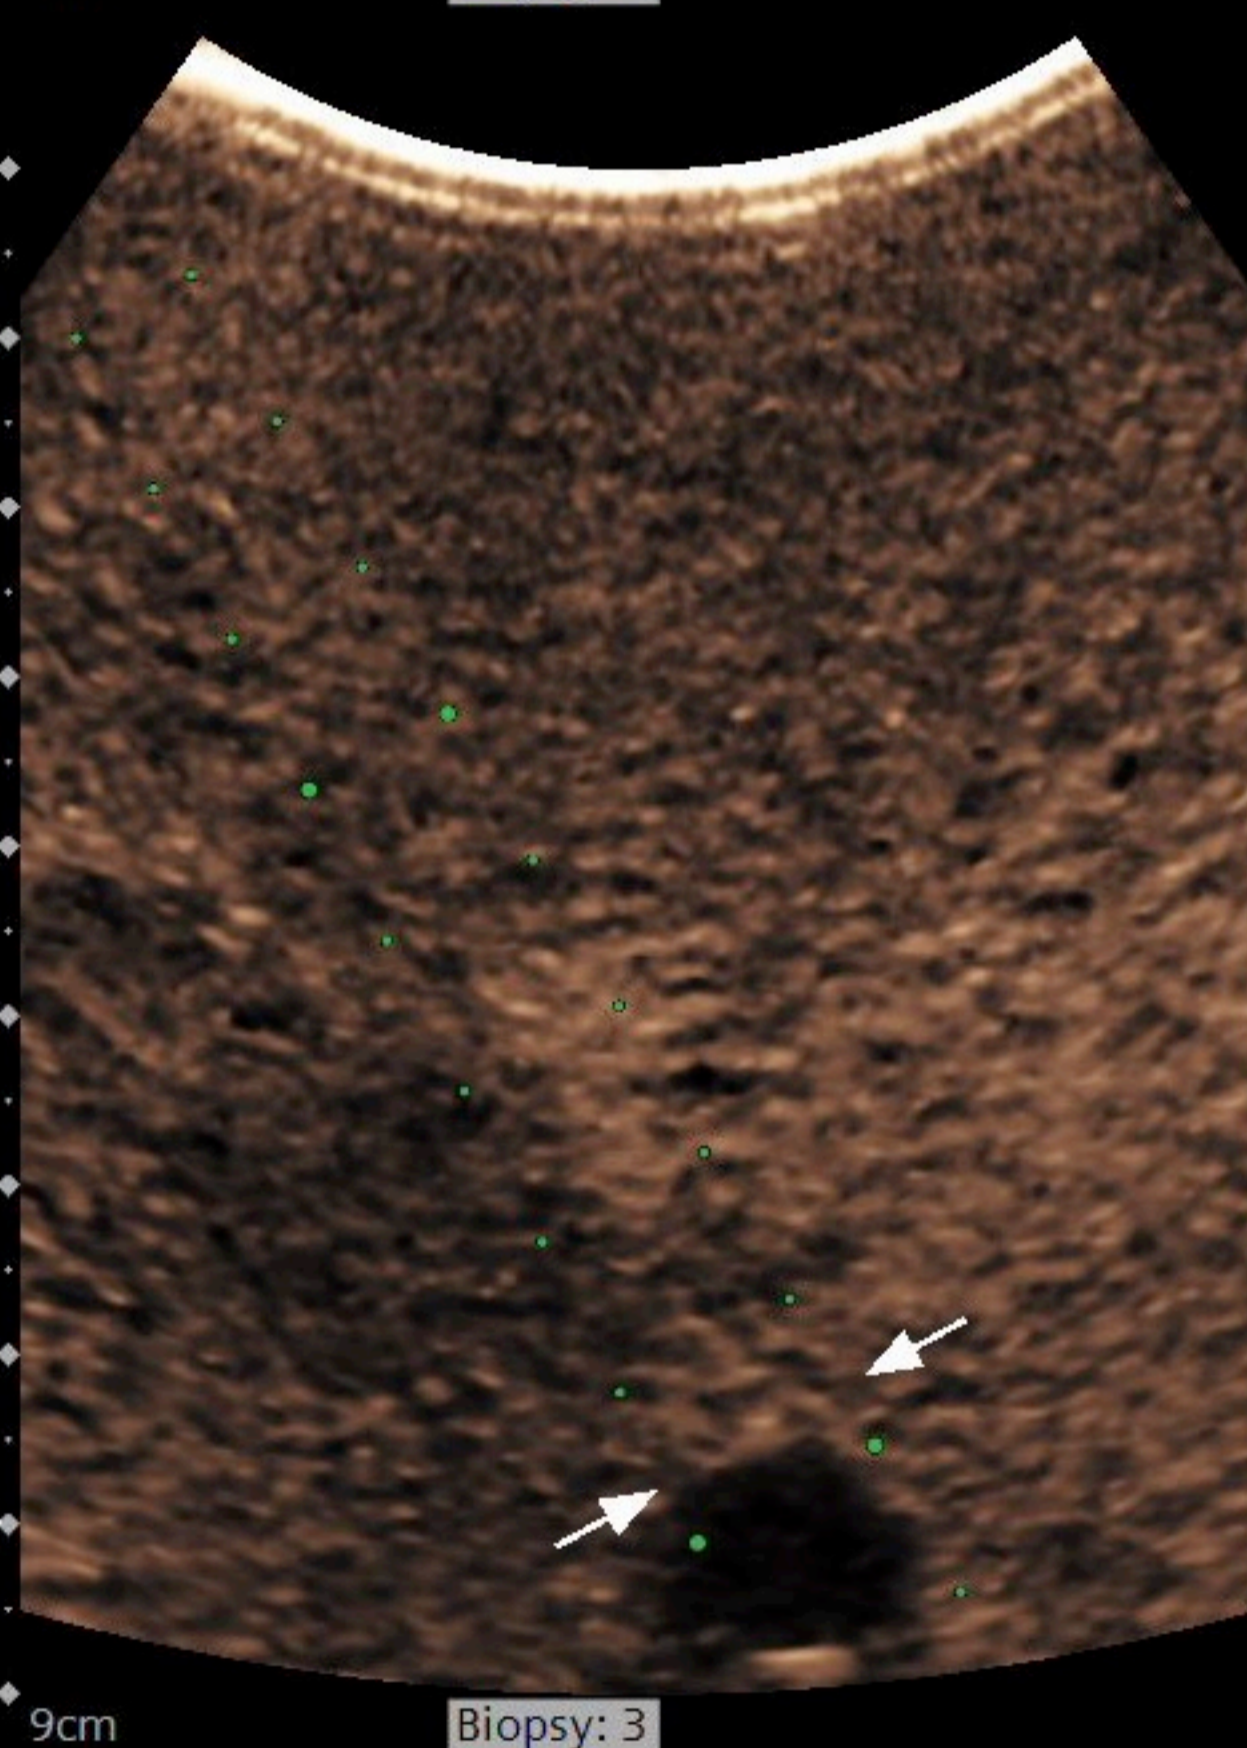

2nd puncture

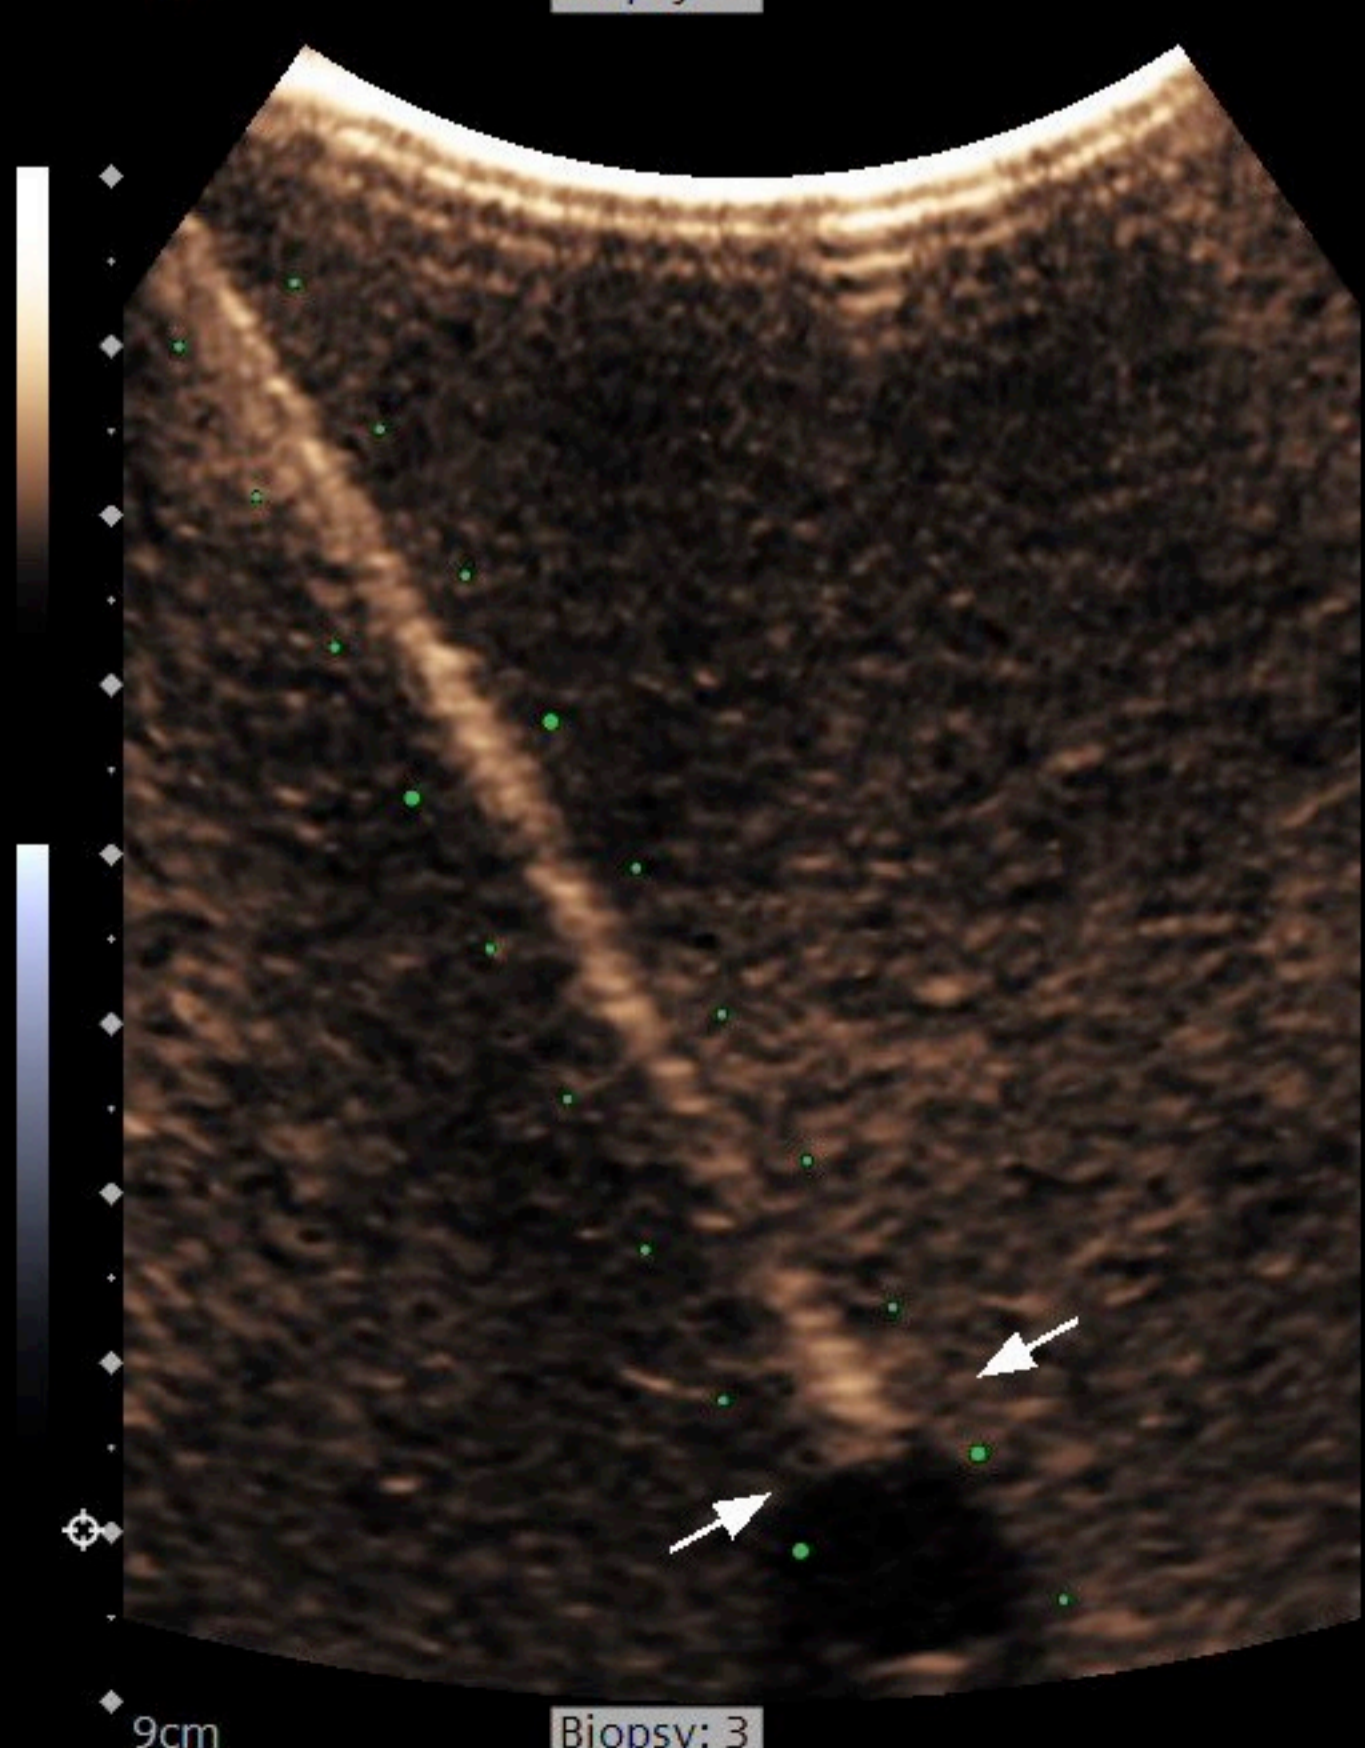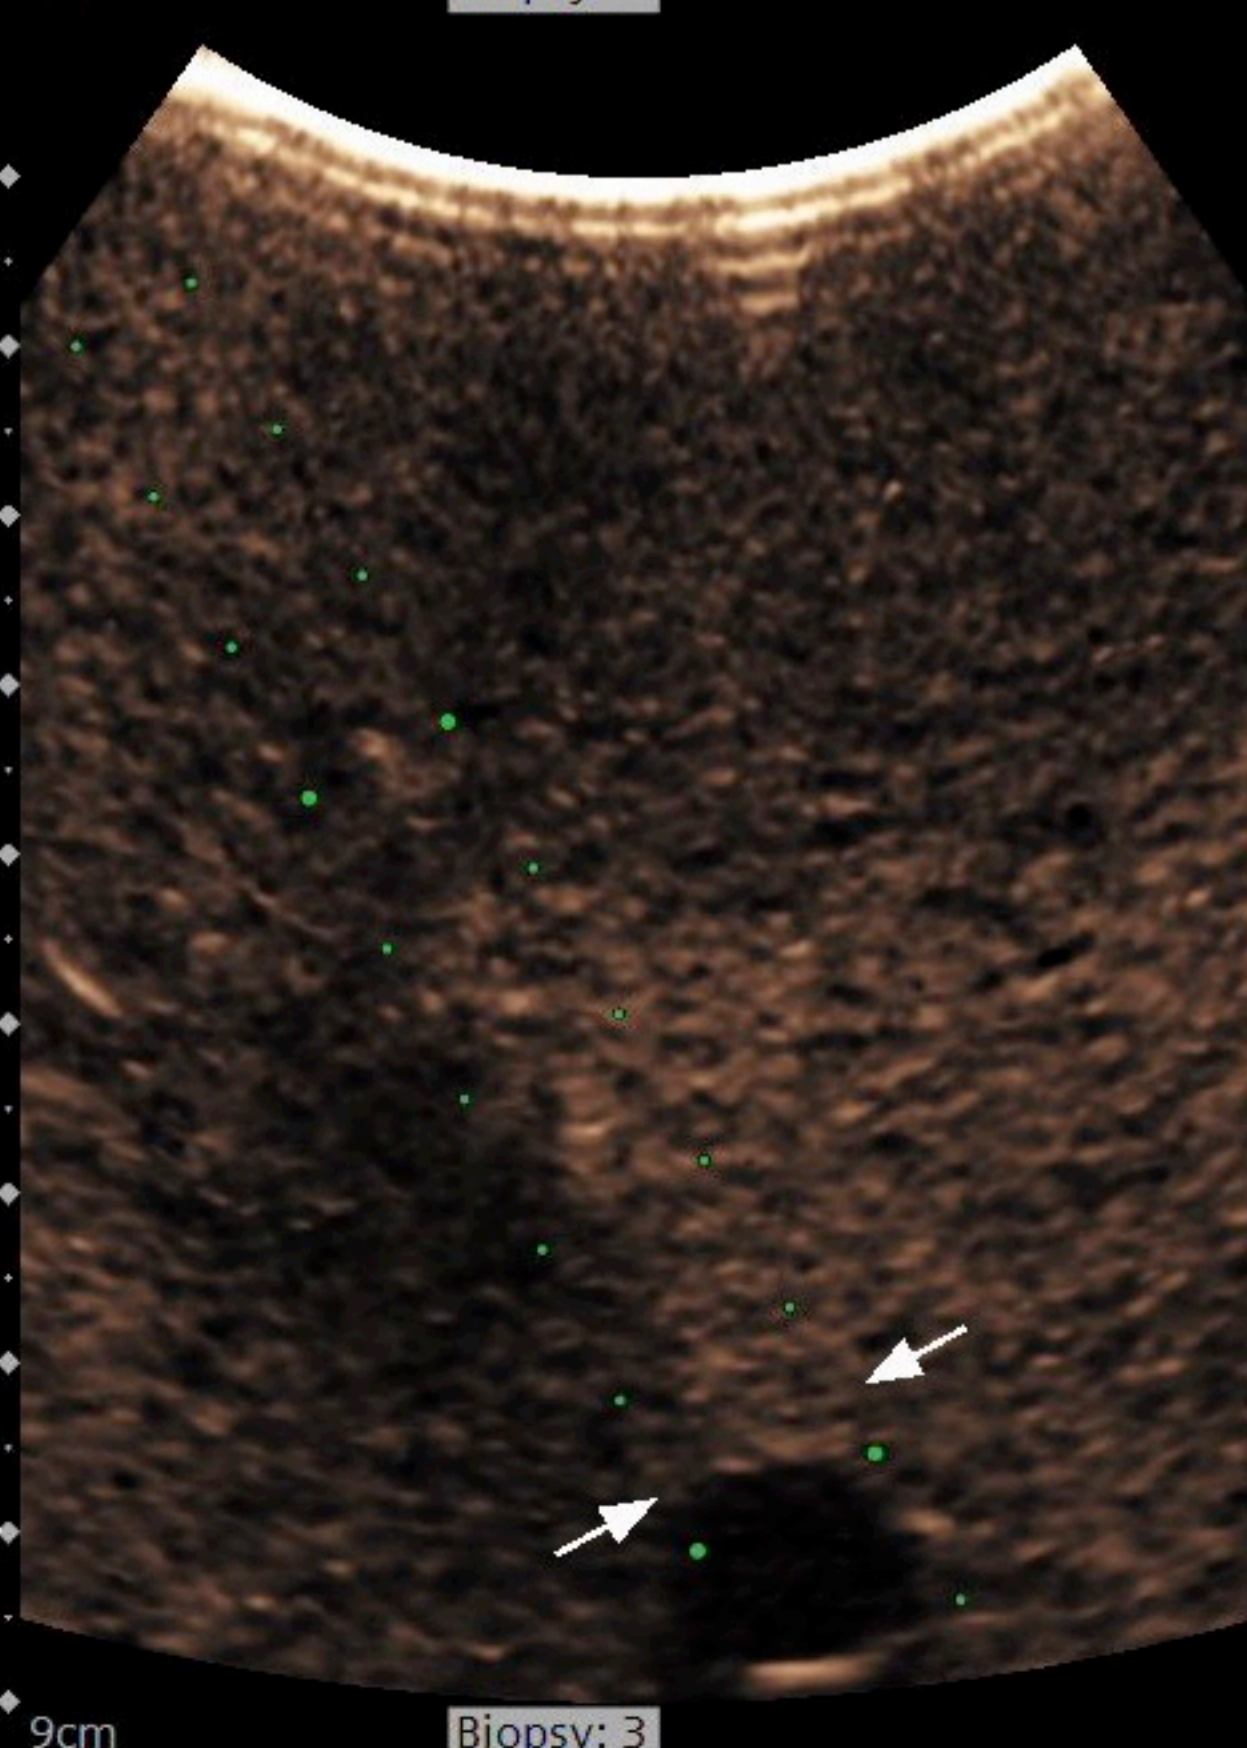

3rd puncture

Ultrasound contrast agent

Control



Full core biopsy needle (set 10/10)

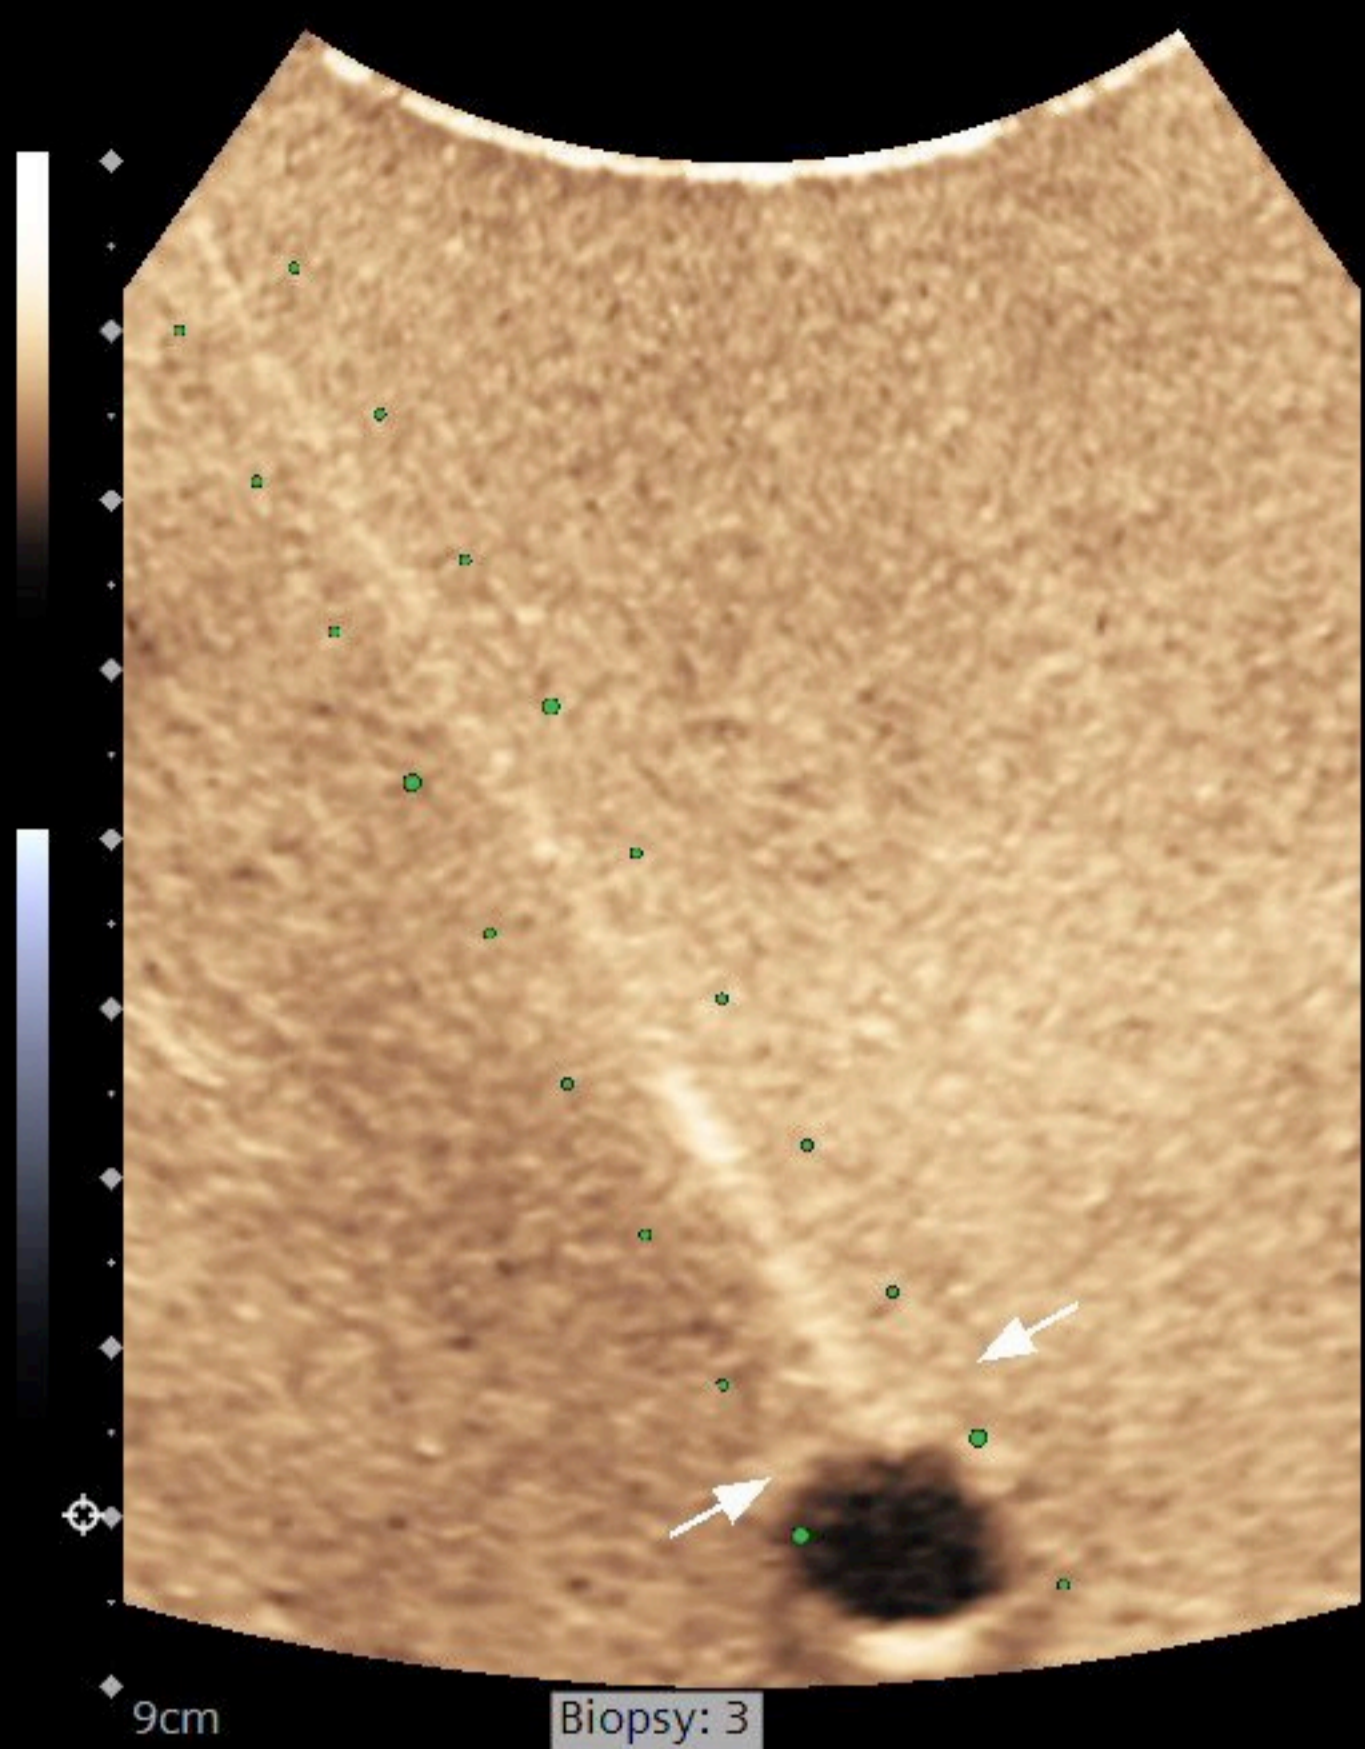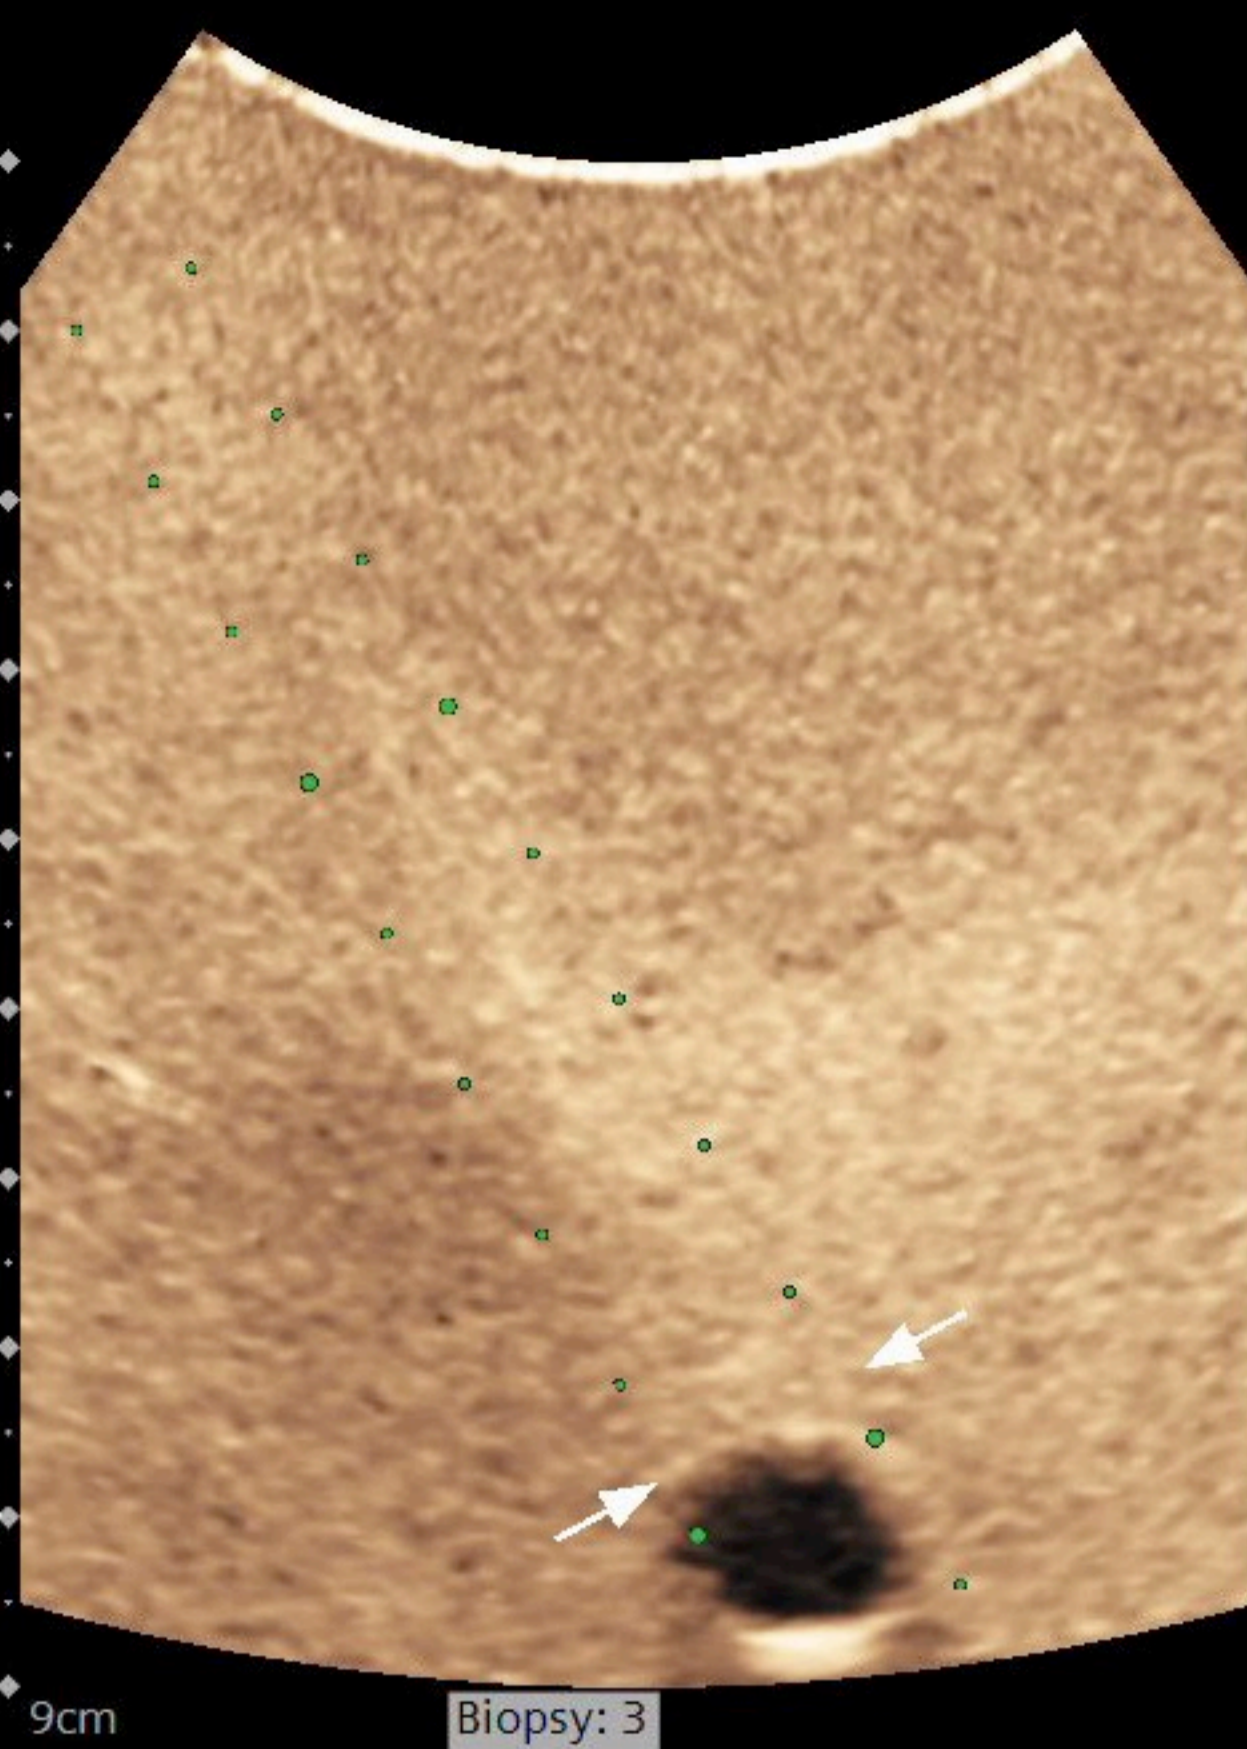

1st puncture

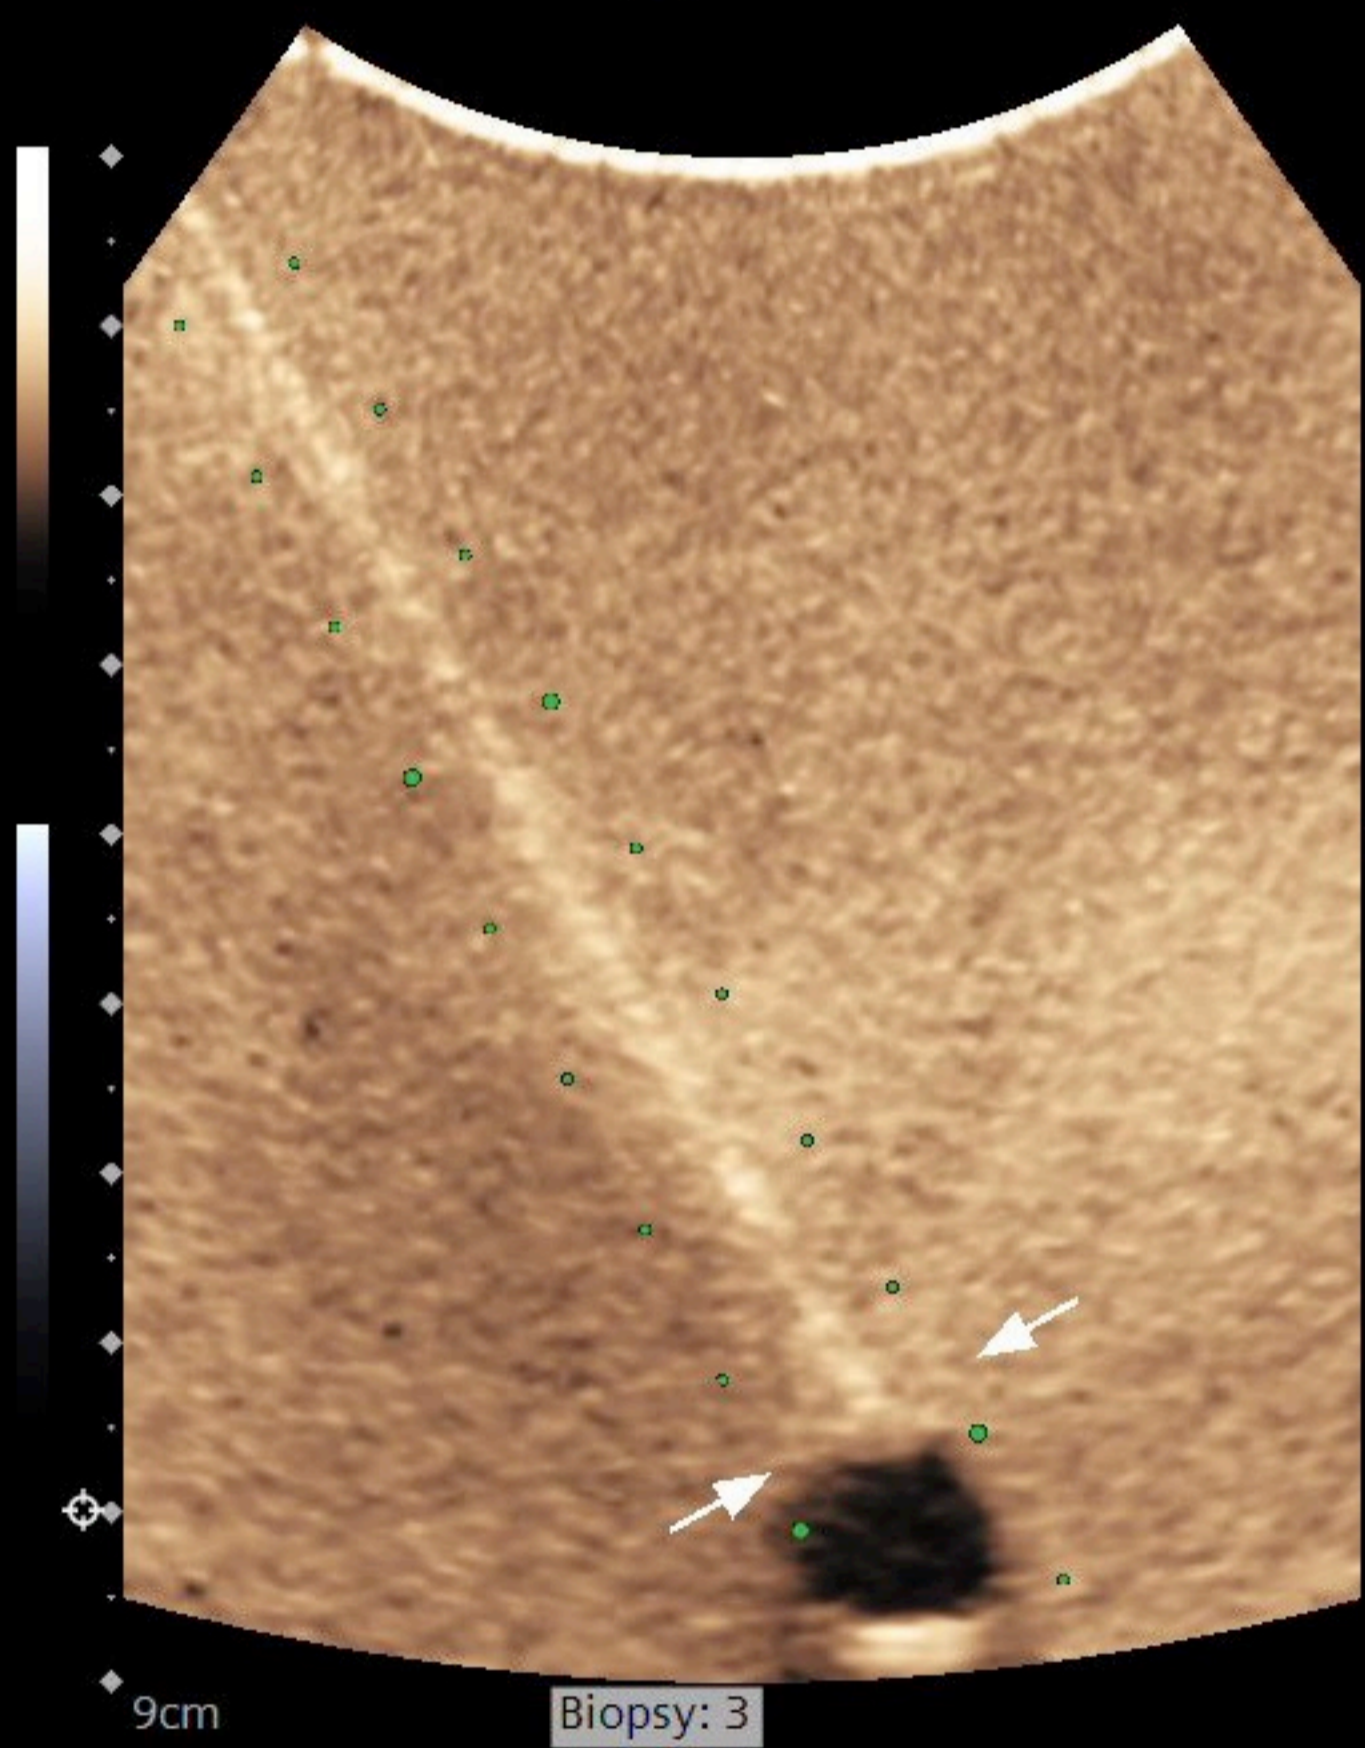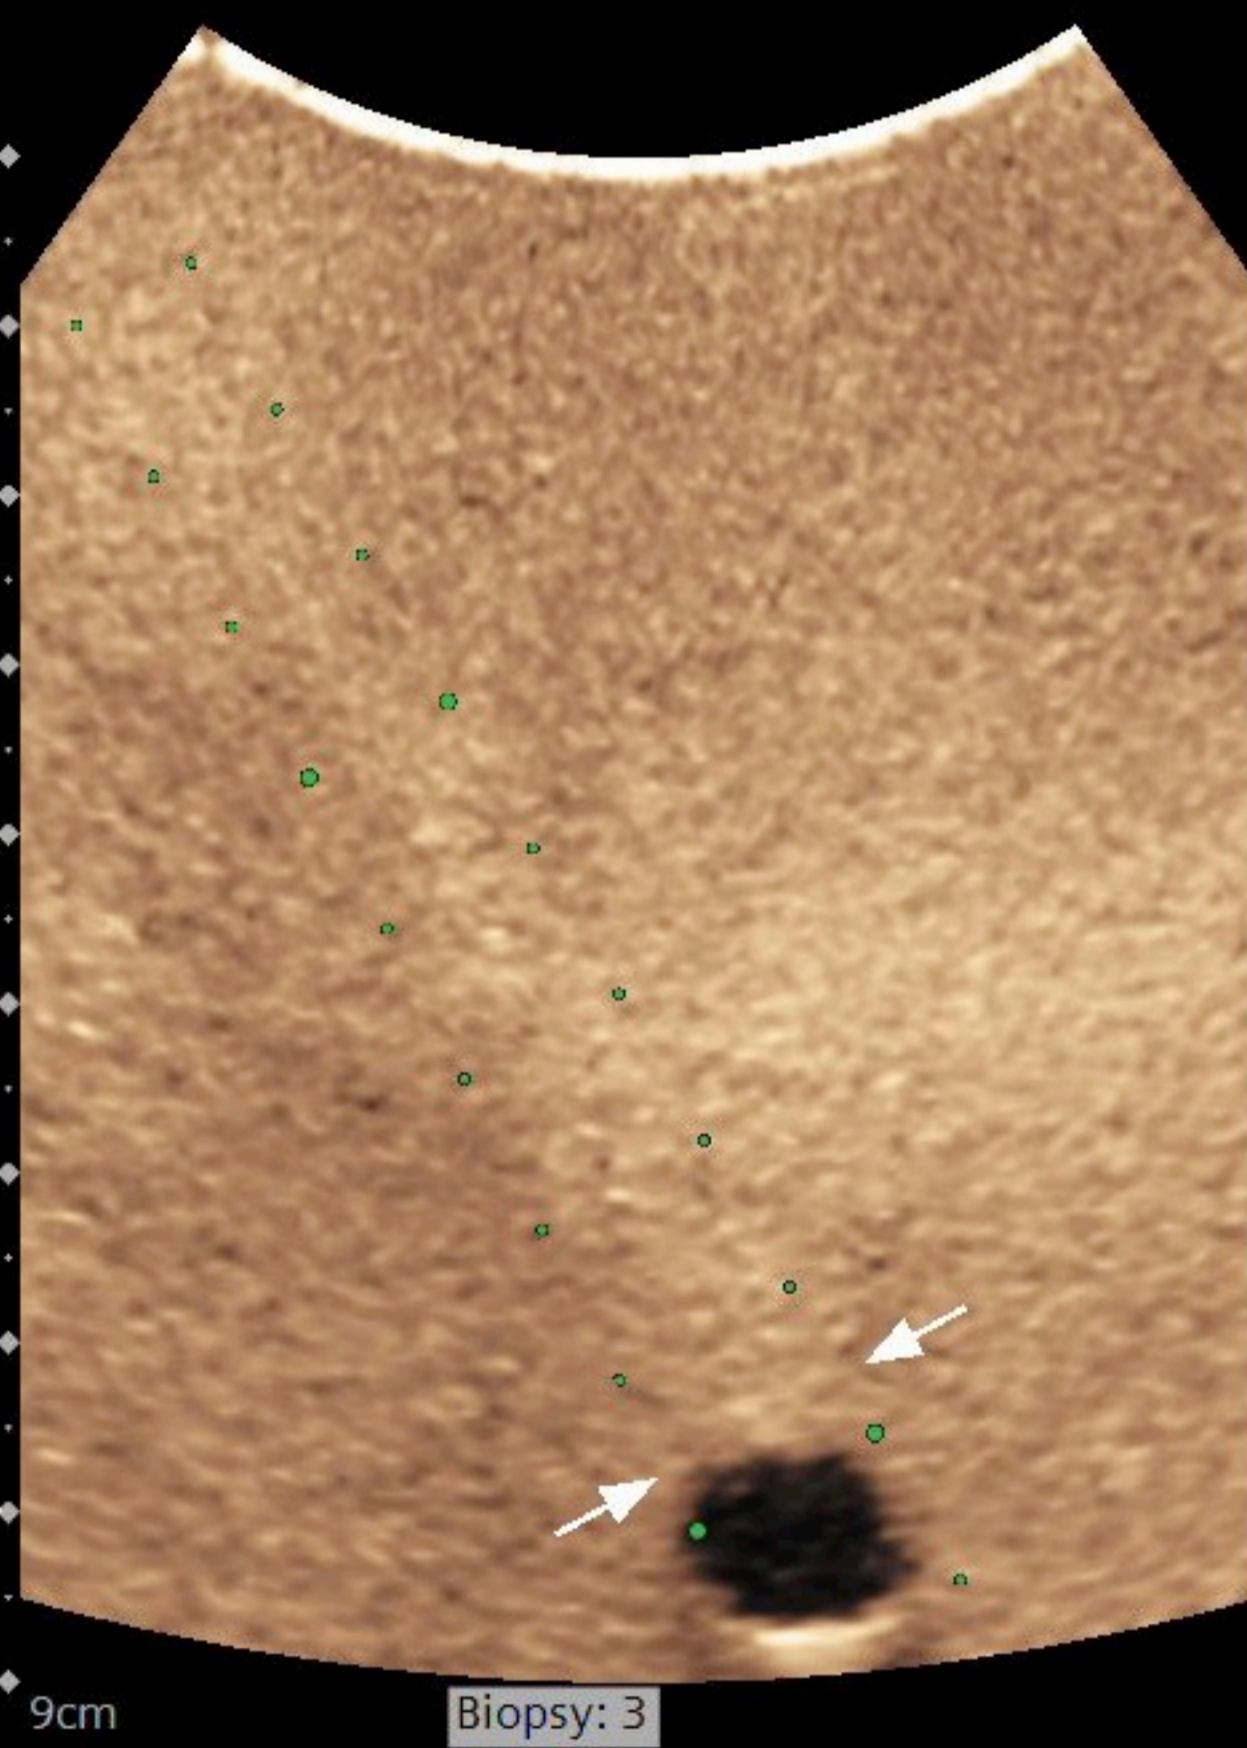

2nd puncture

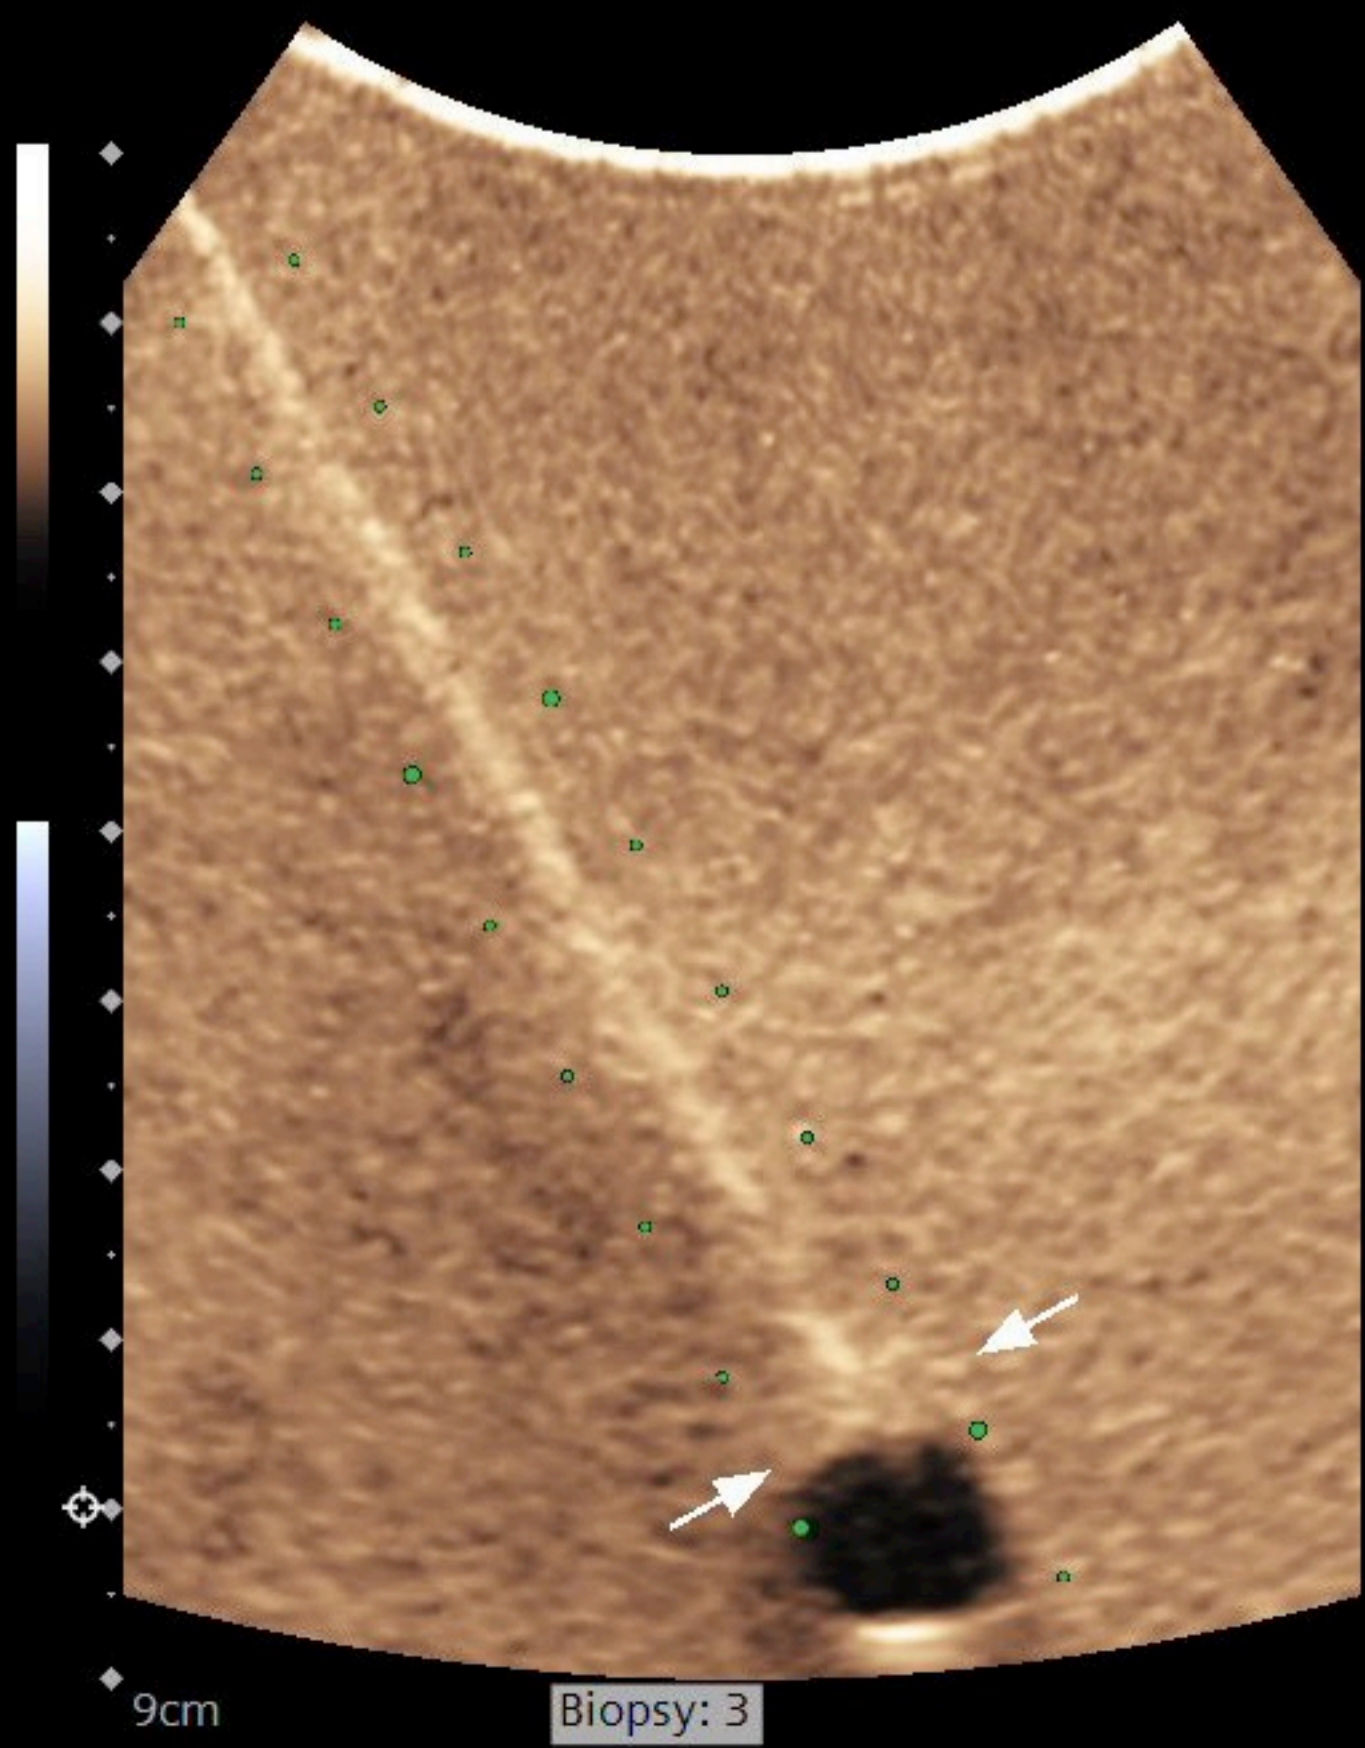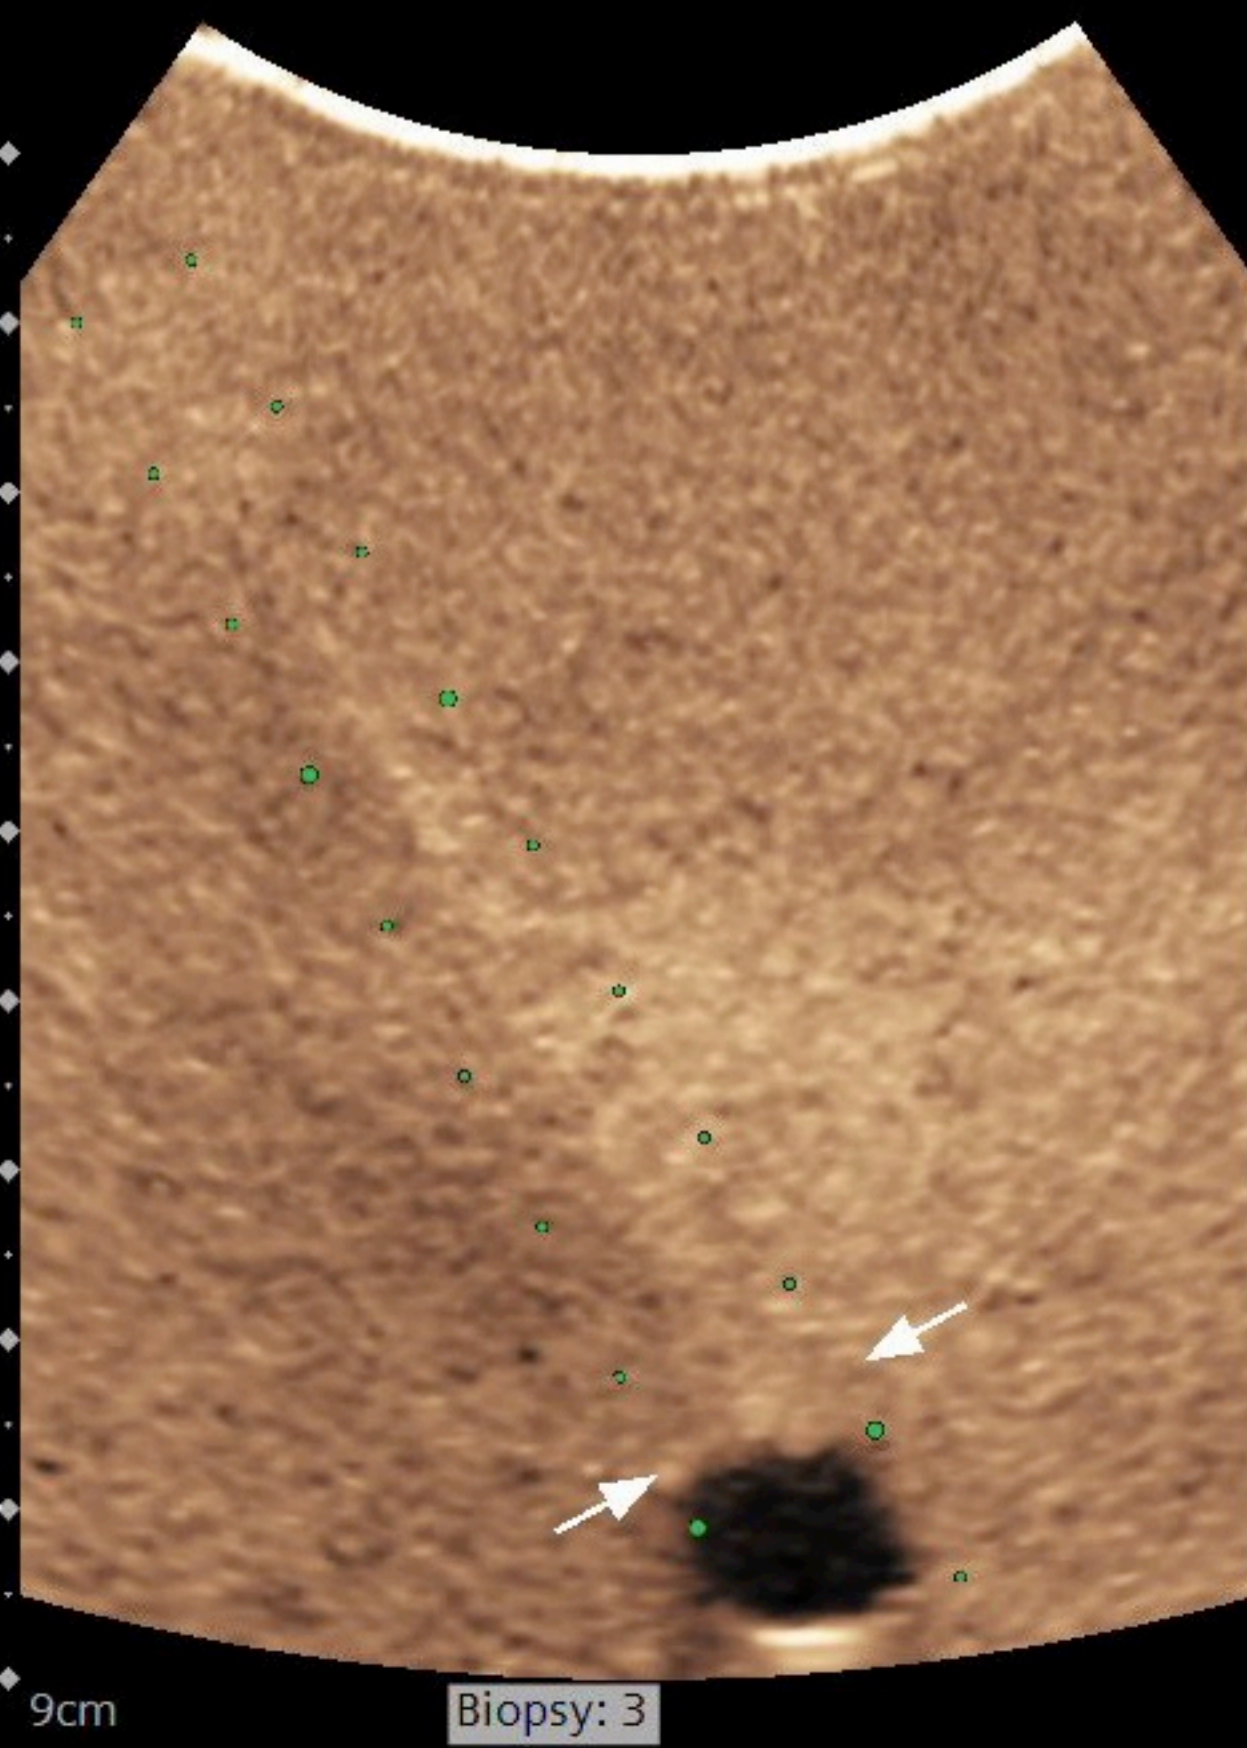

3rd puncture

Ultrasound contrast agent

Control



Introducer needle (set 1/10)

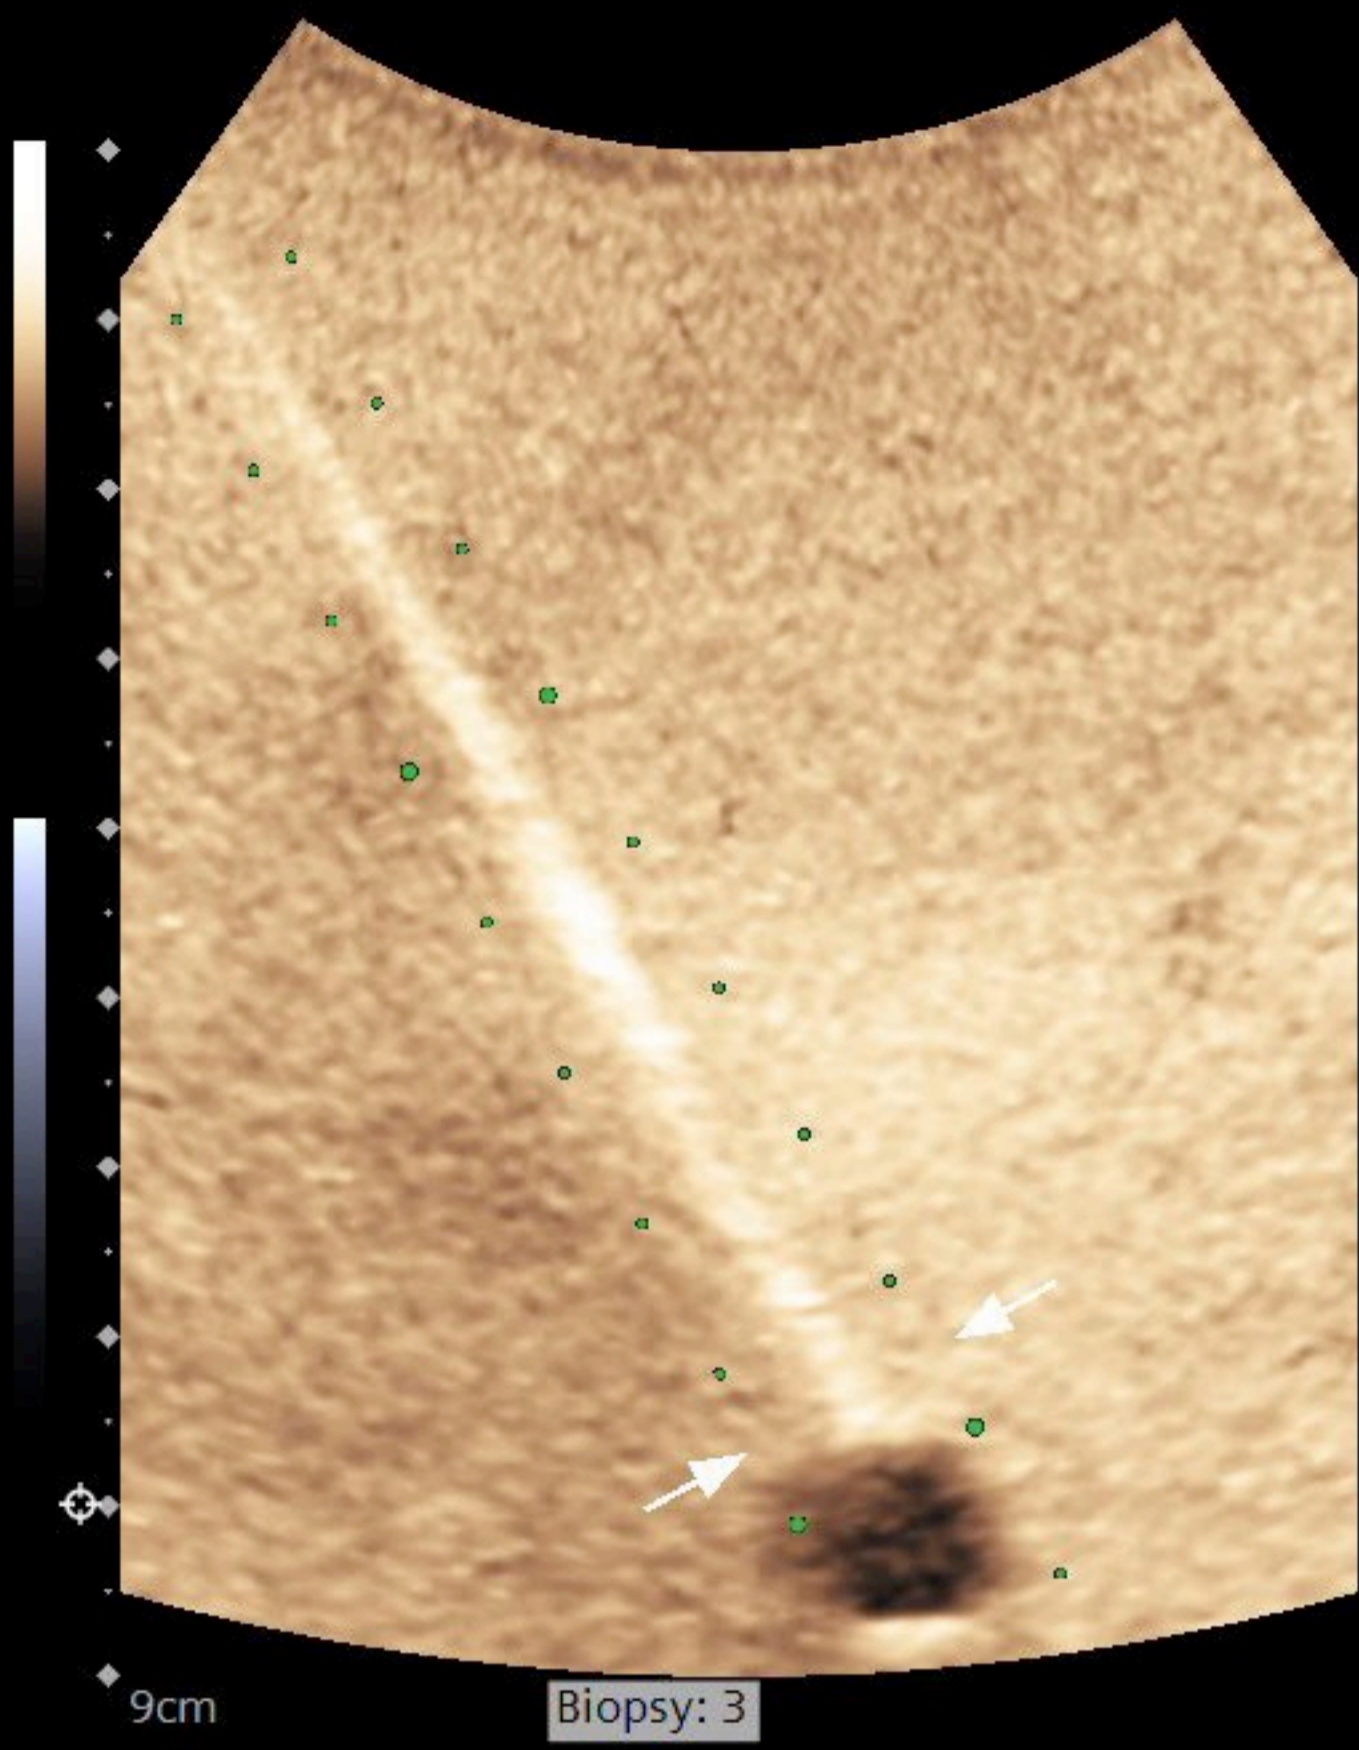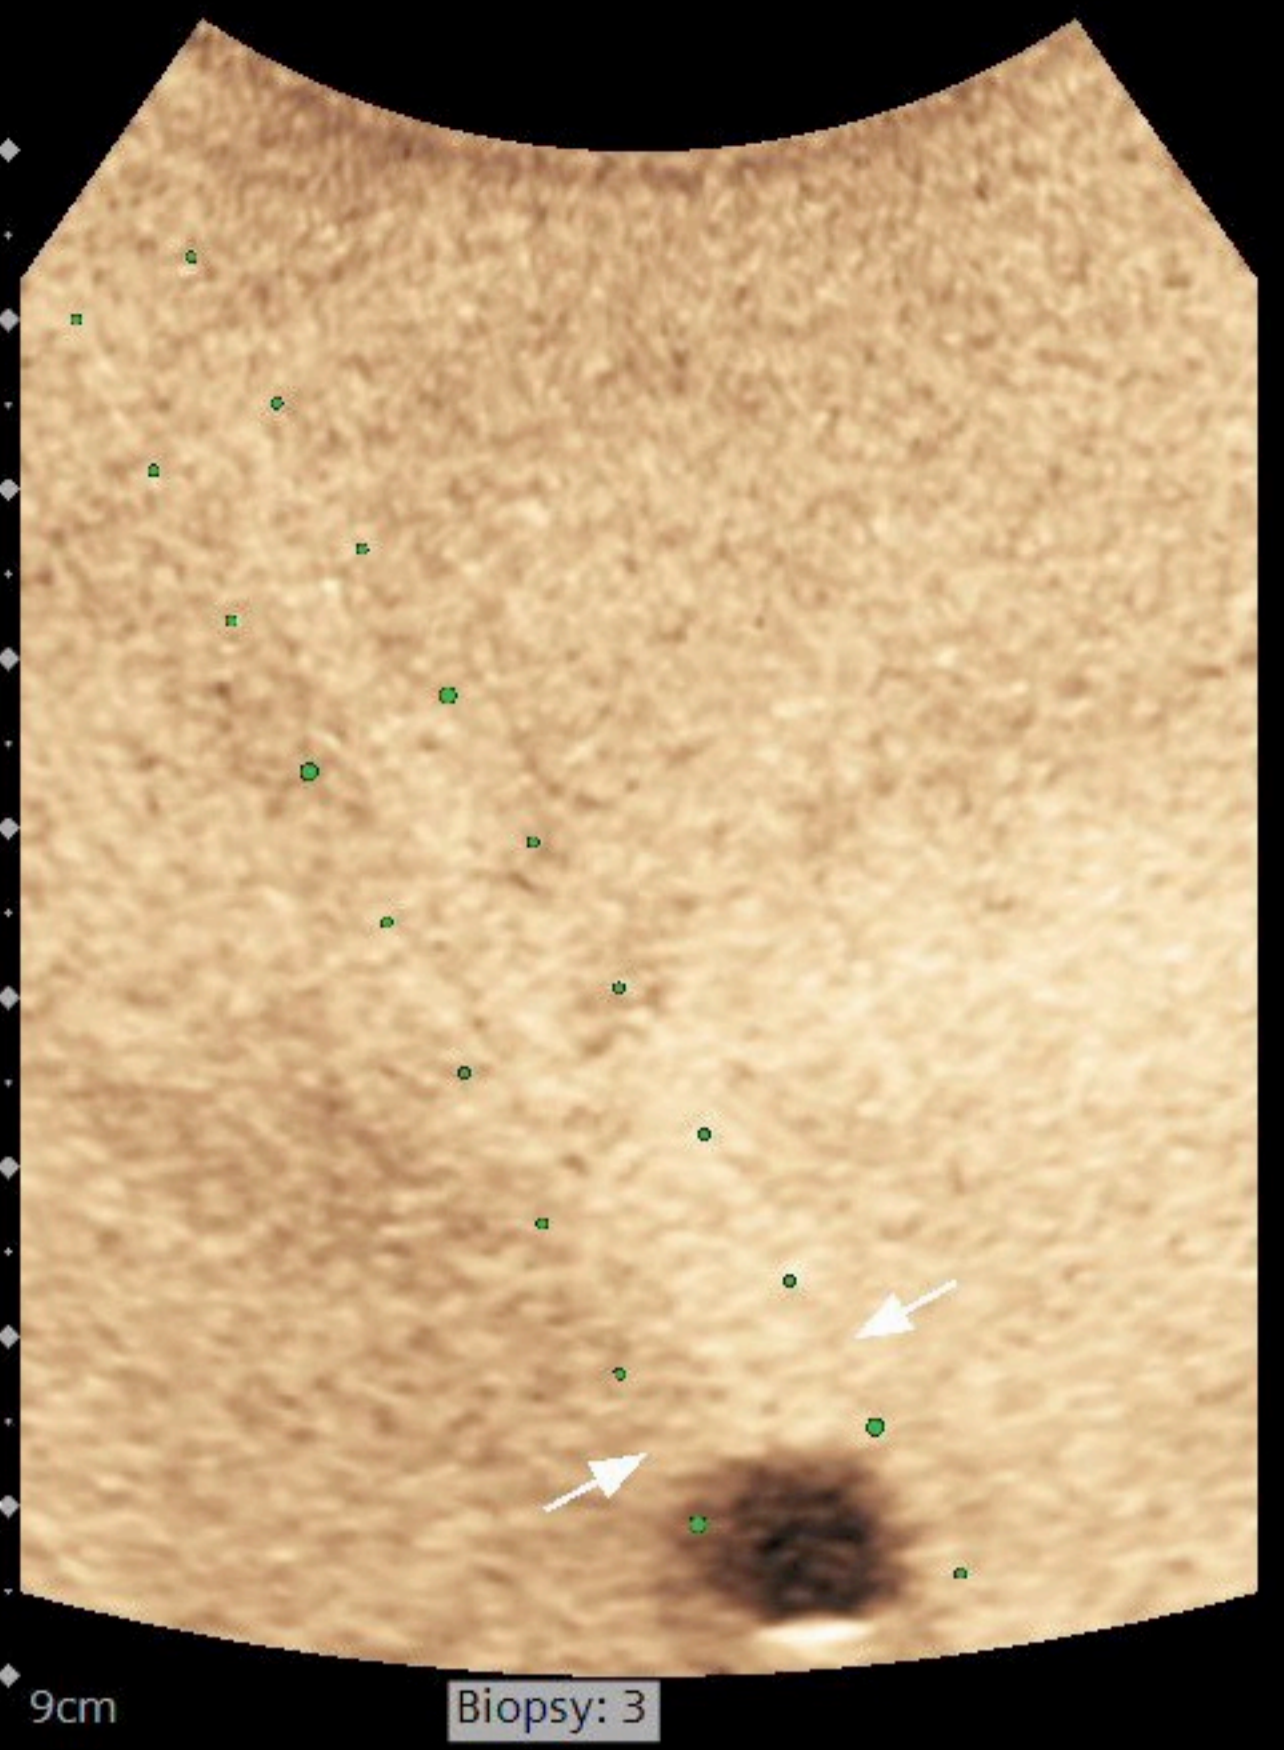

1st puncture

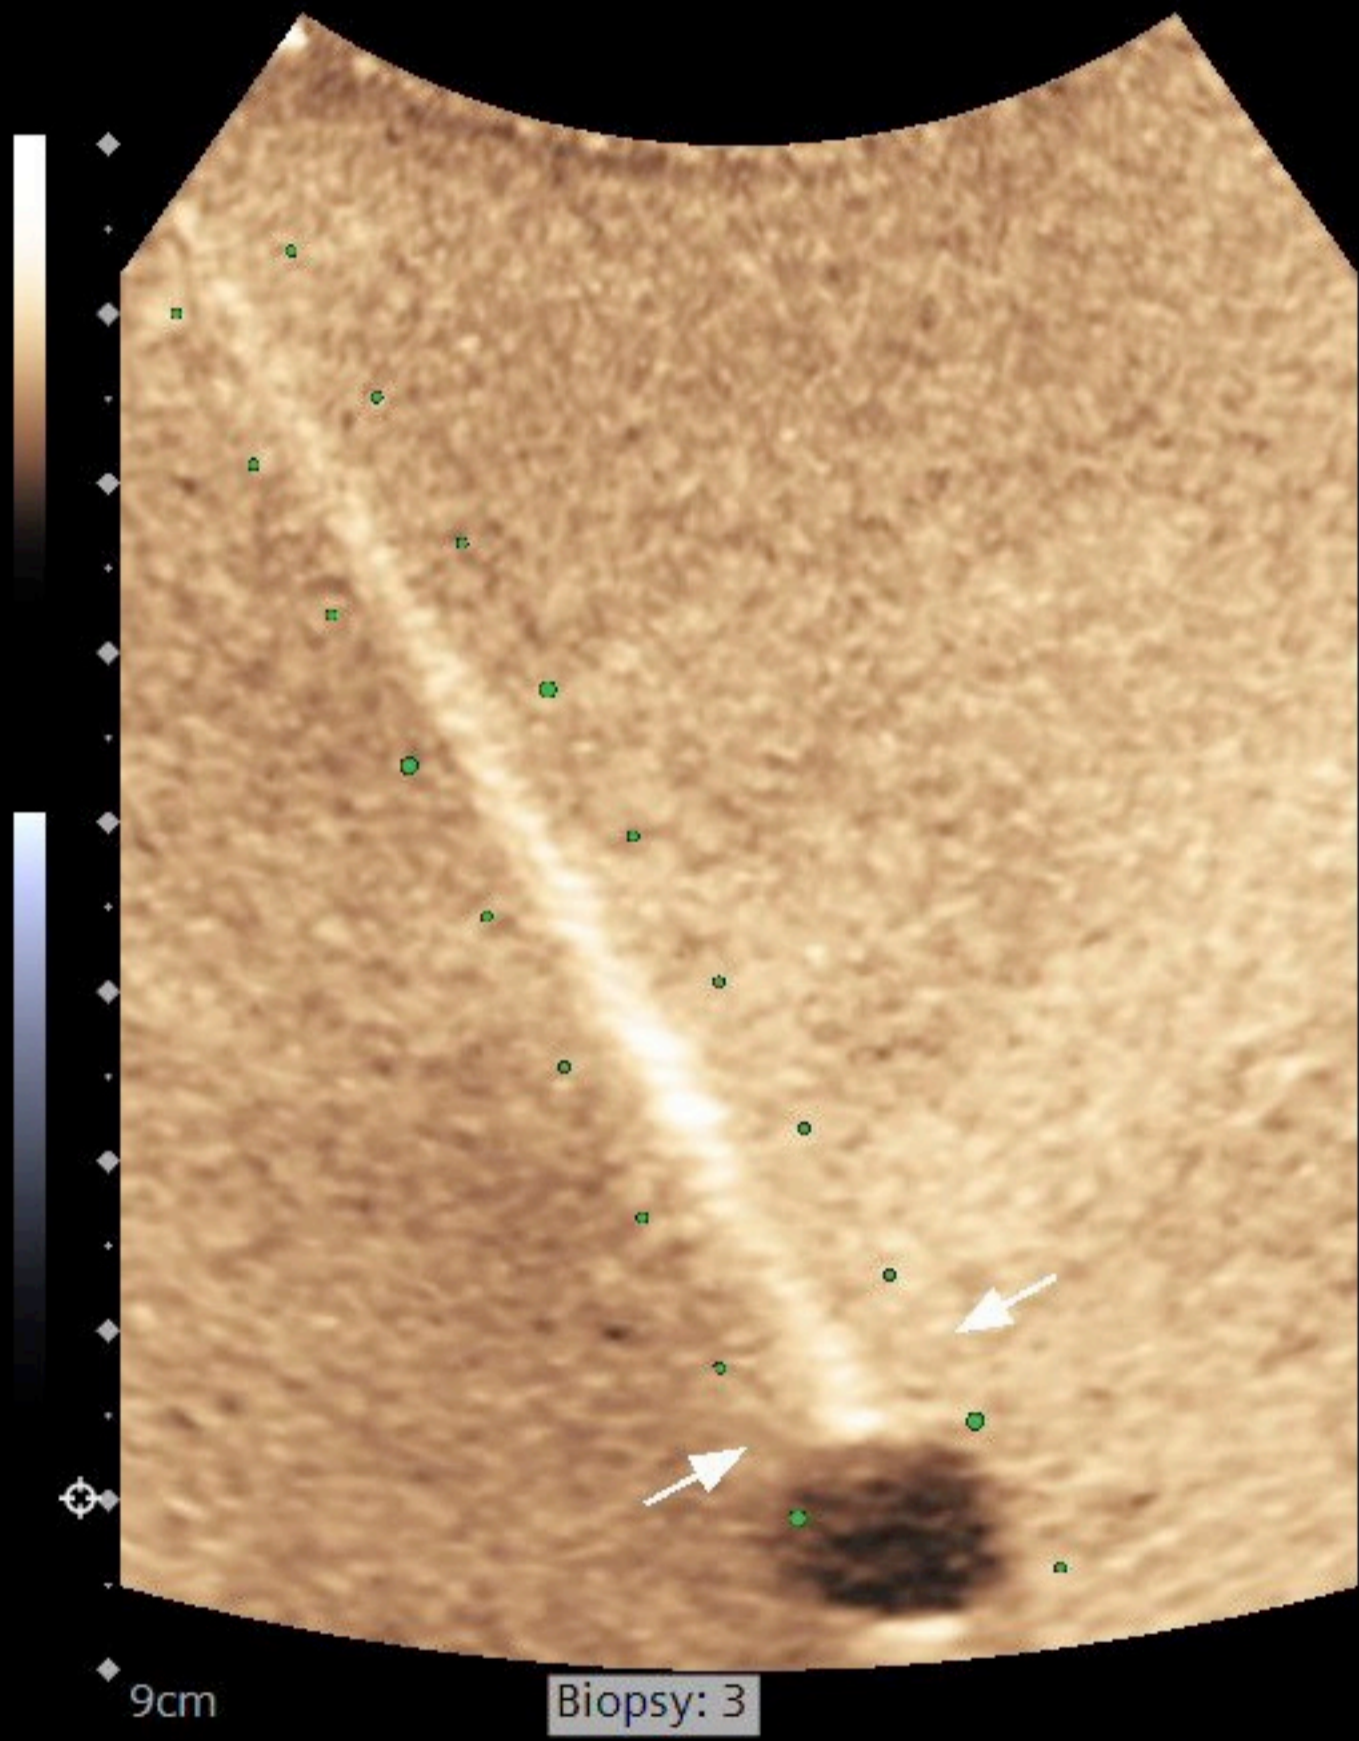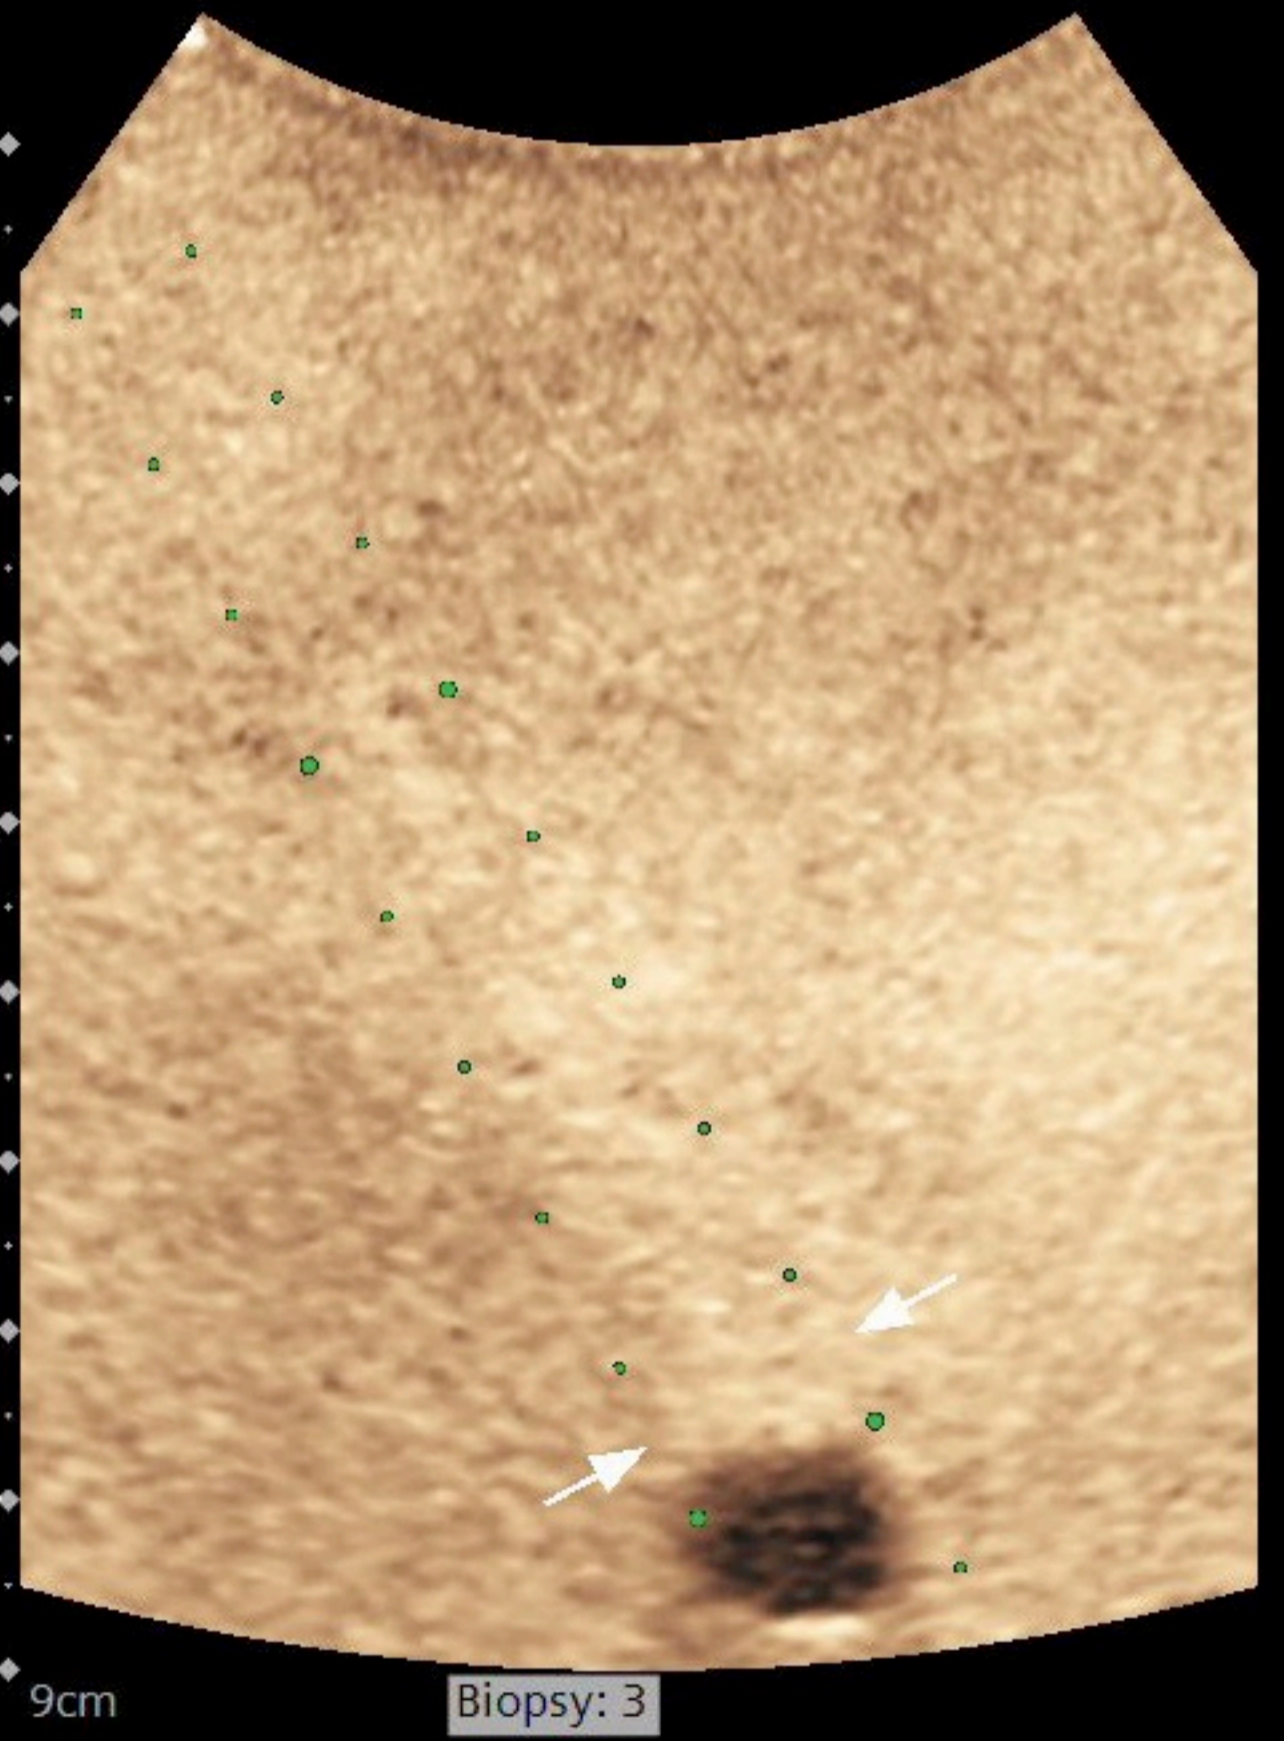

2nd puncture

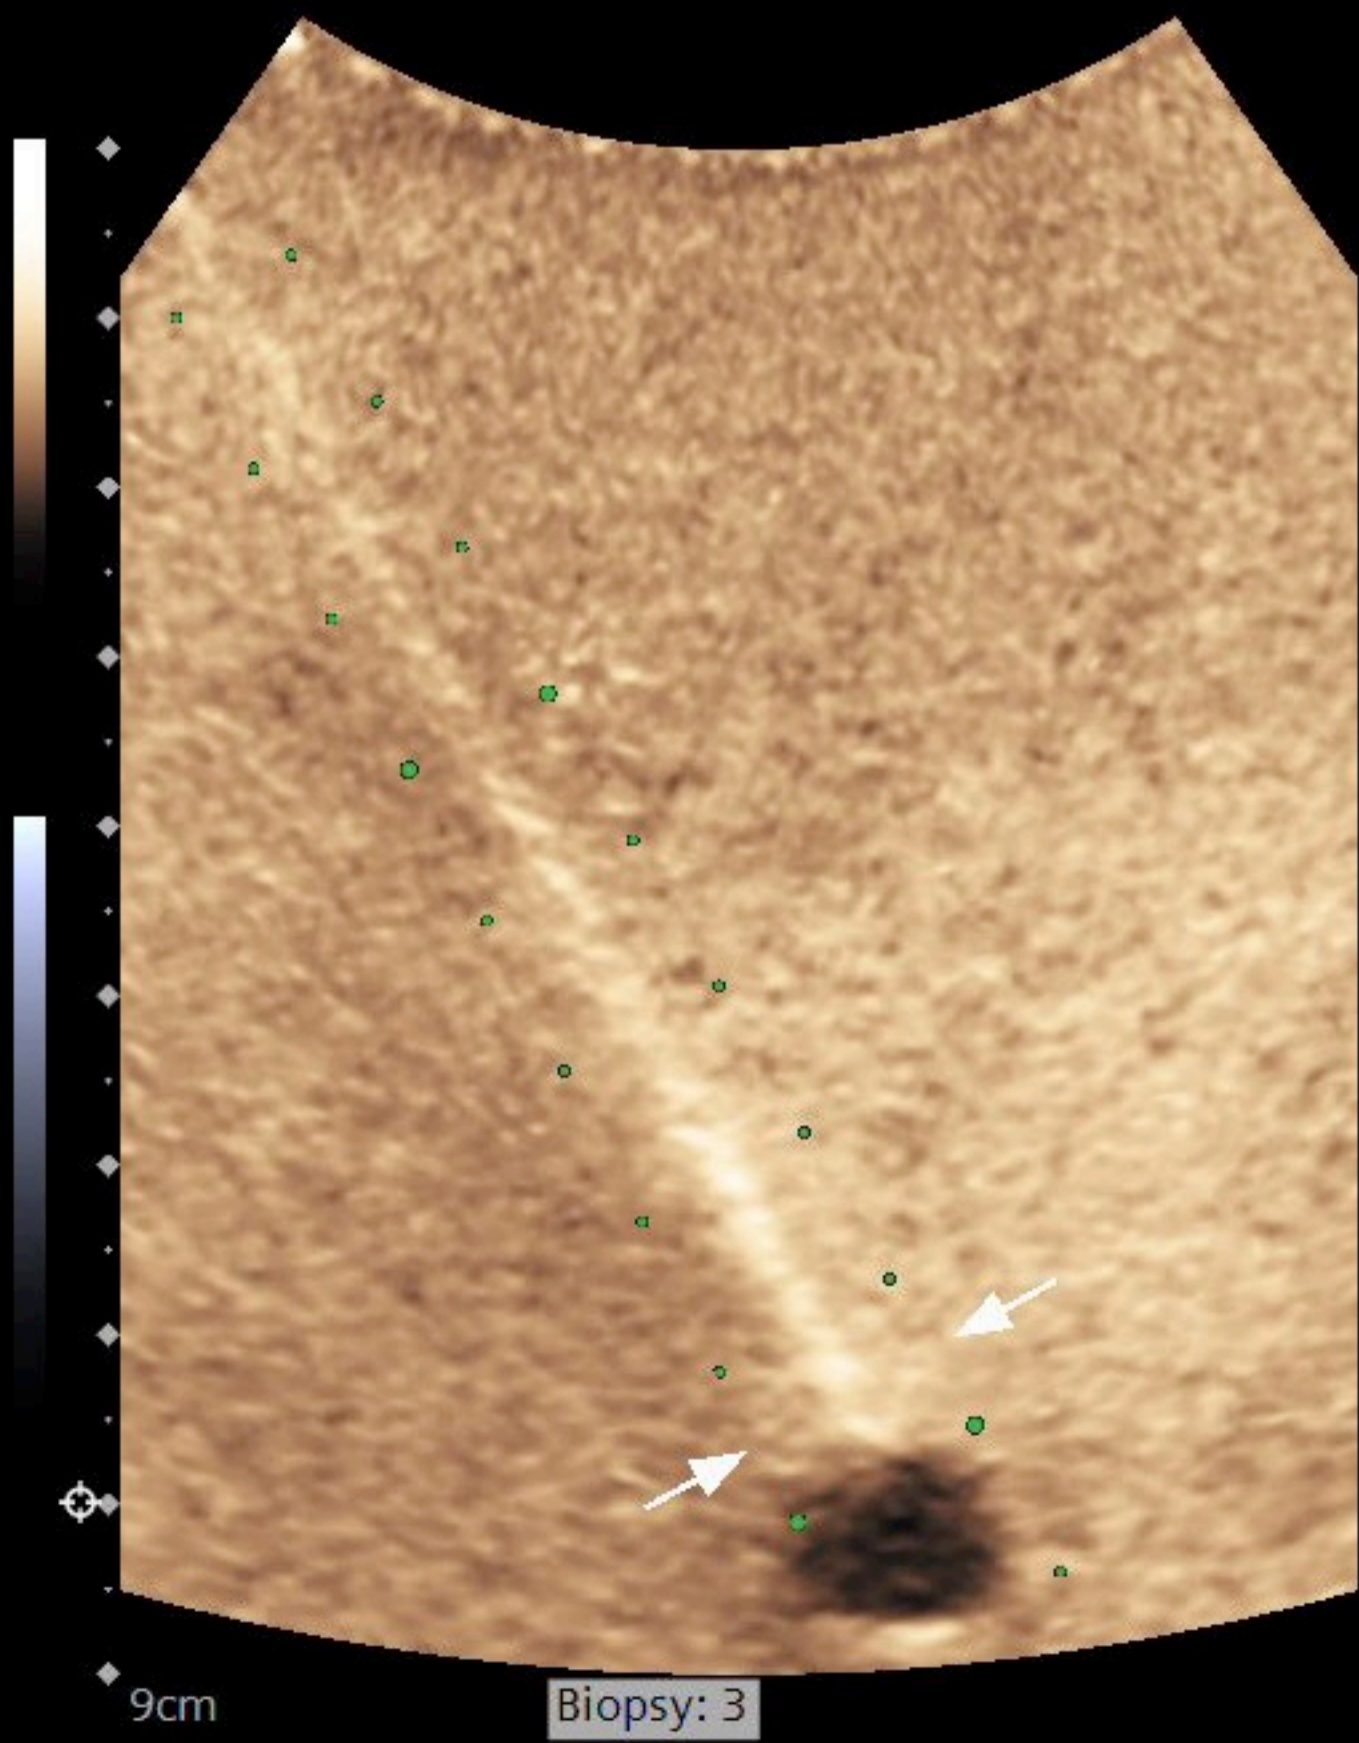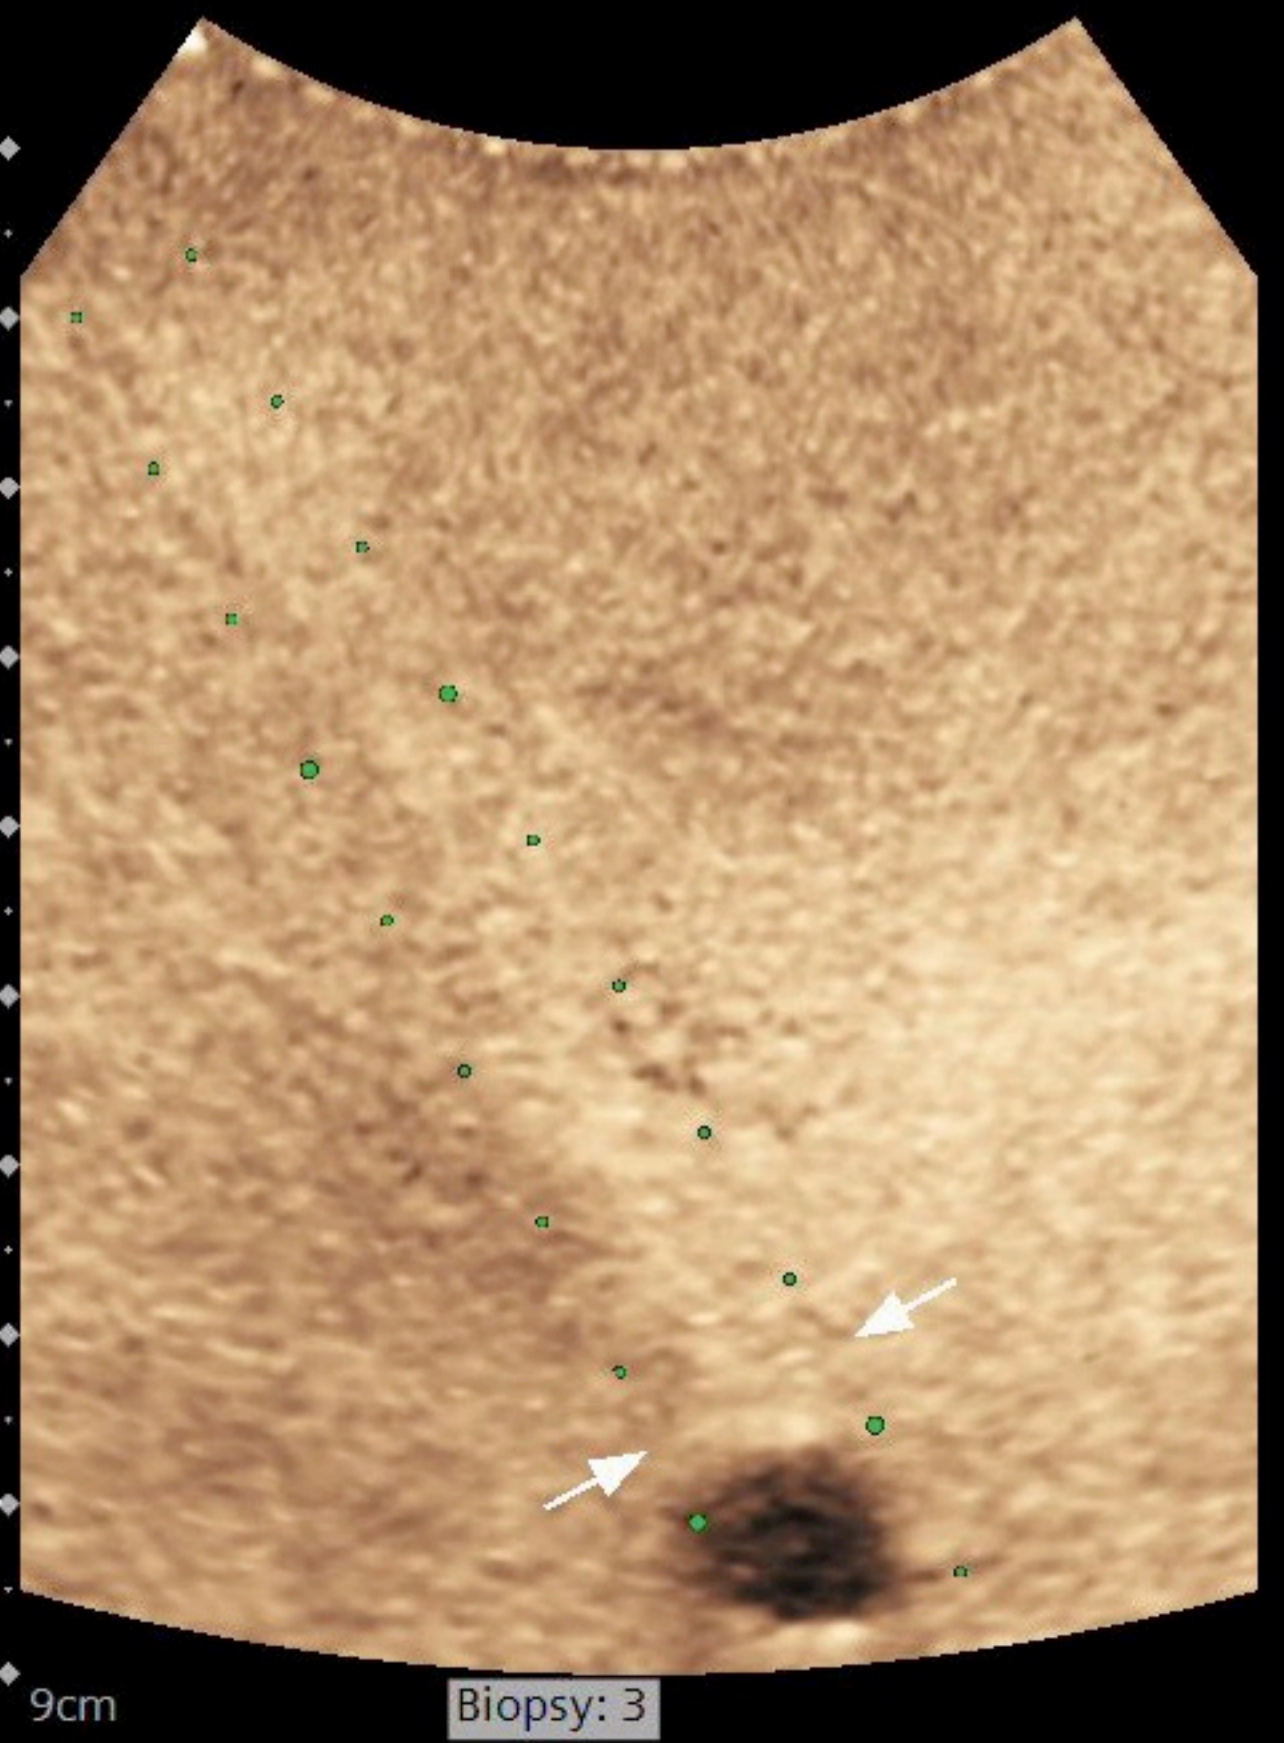

3rd puncture

Ultrasound contrast agent

Control



Introducer needle (set 2/10)

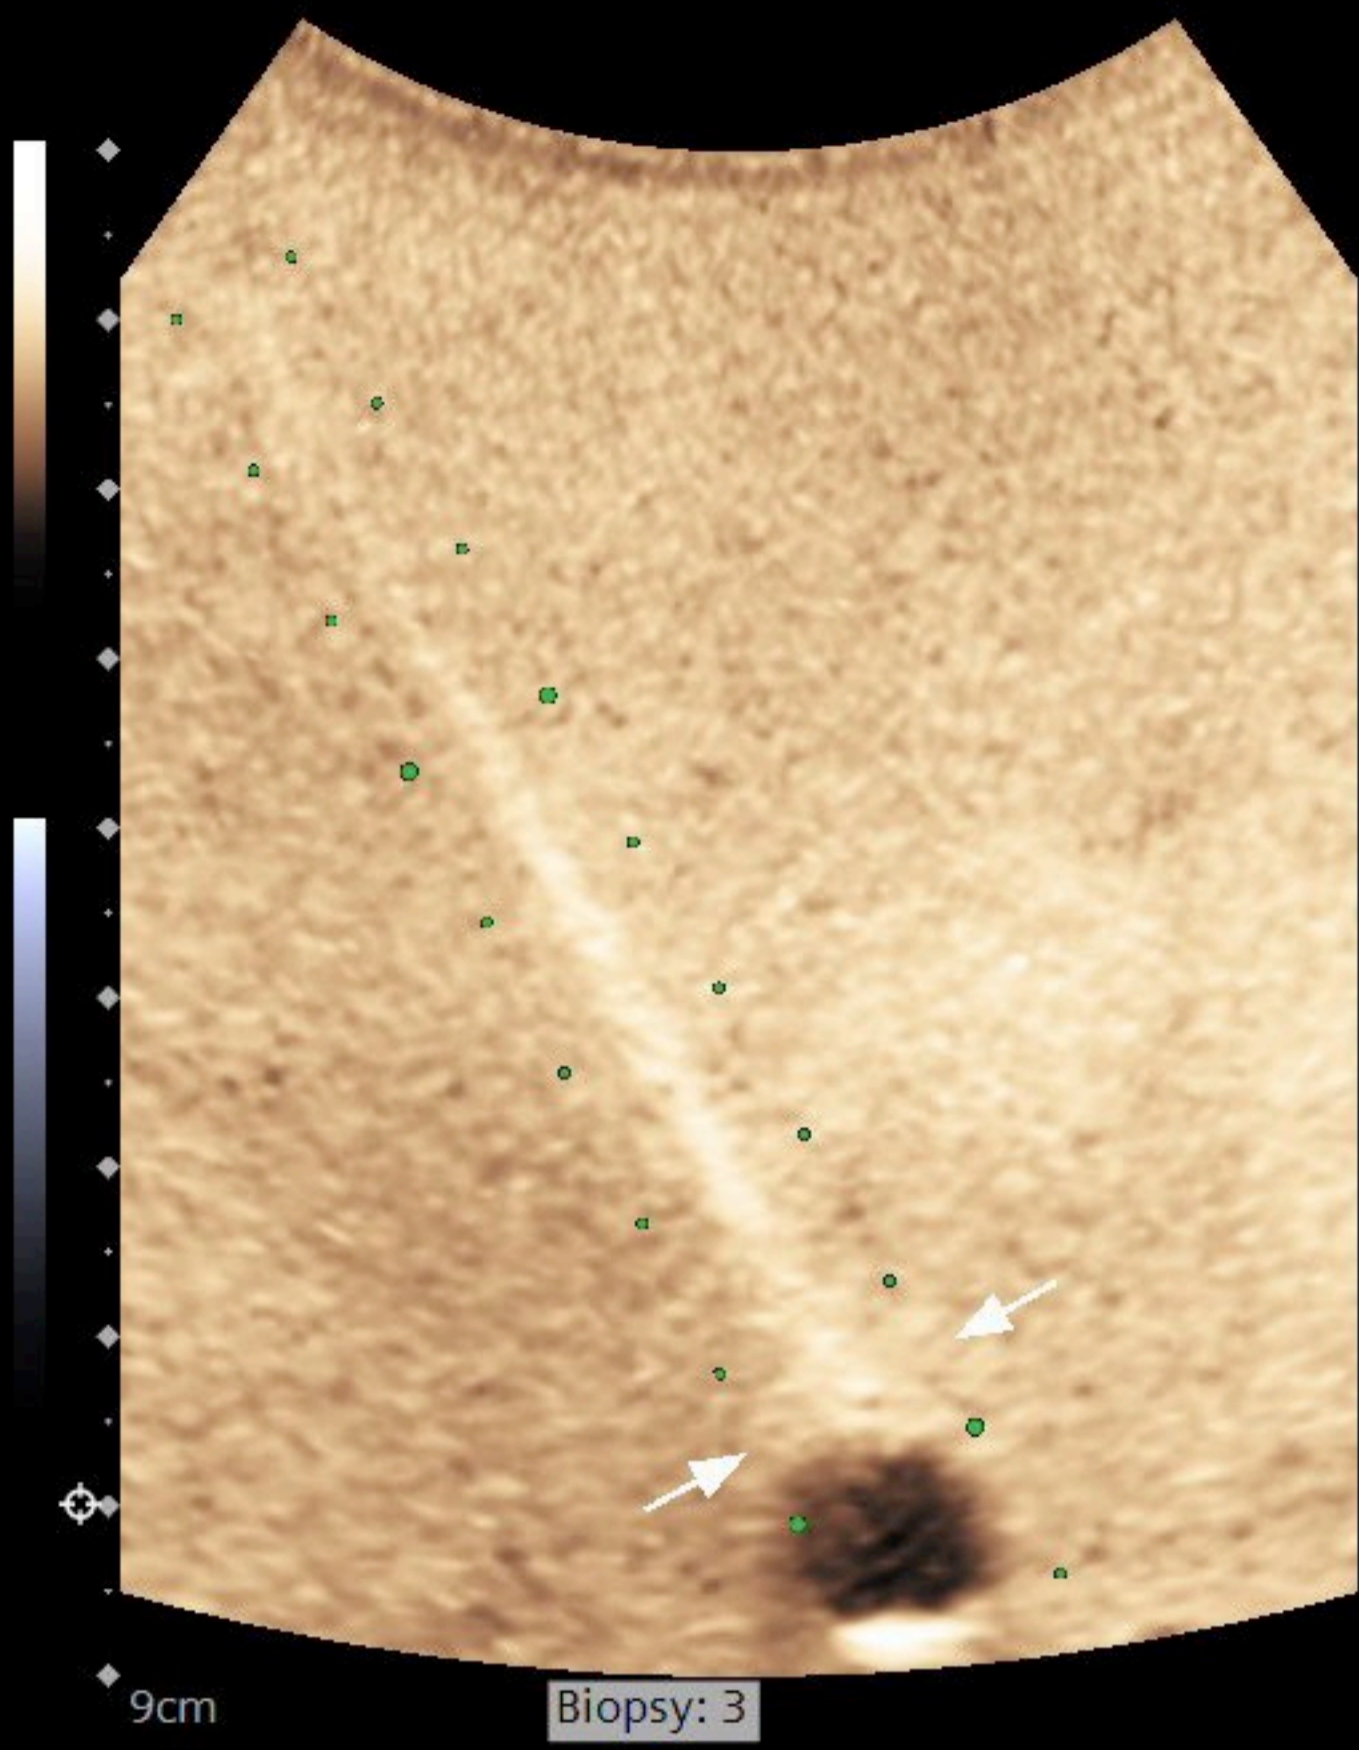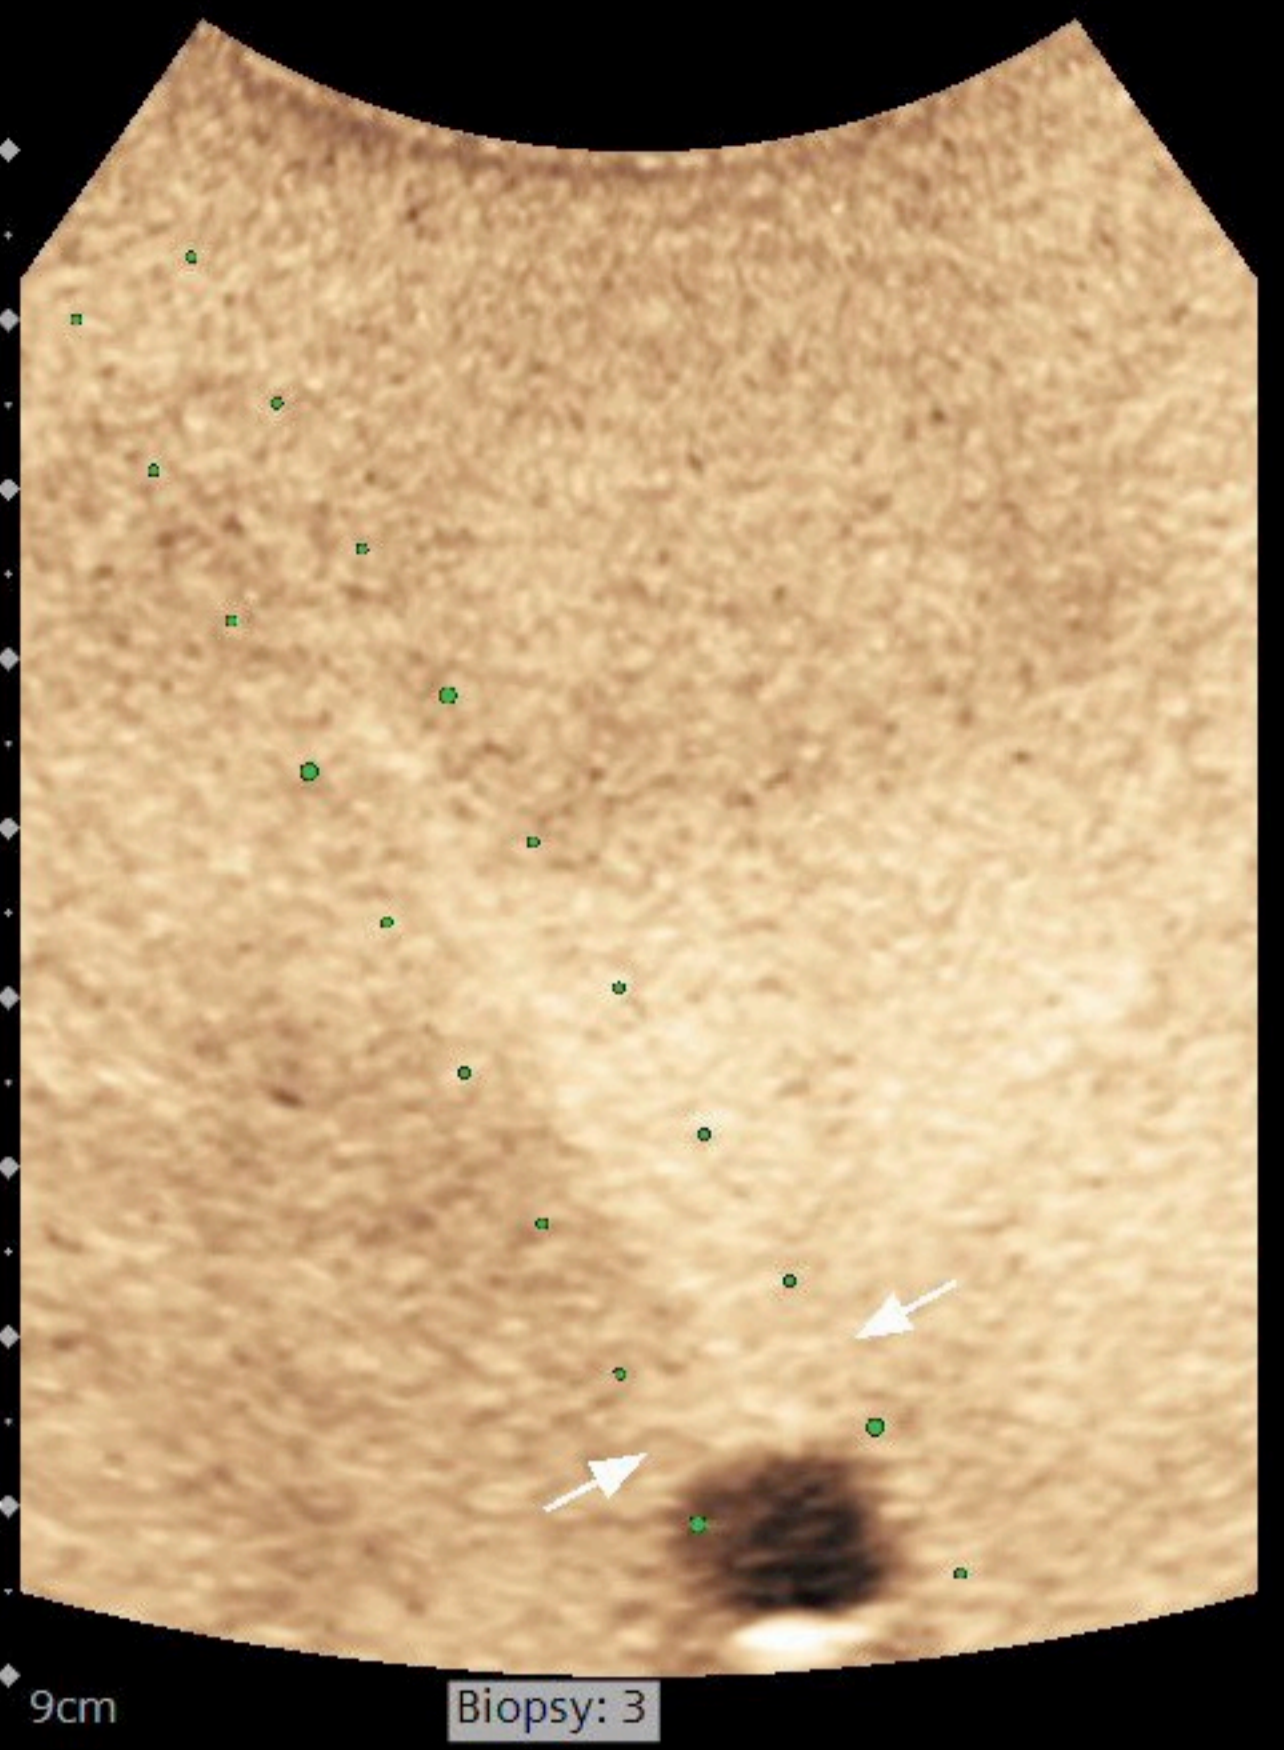

1st puncture

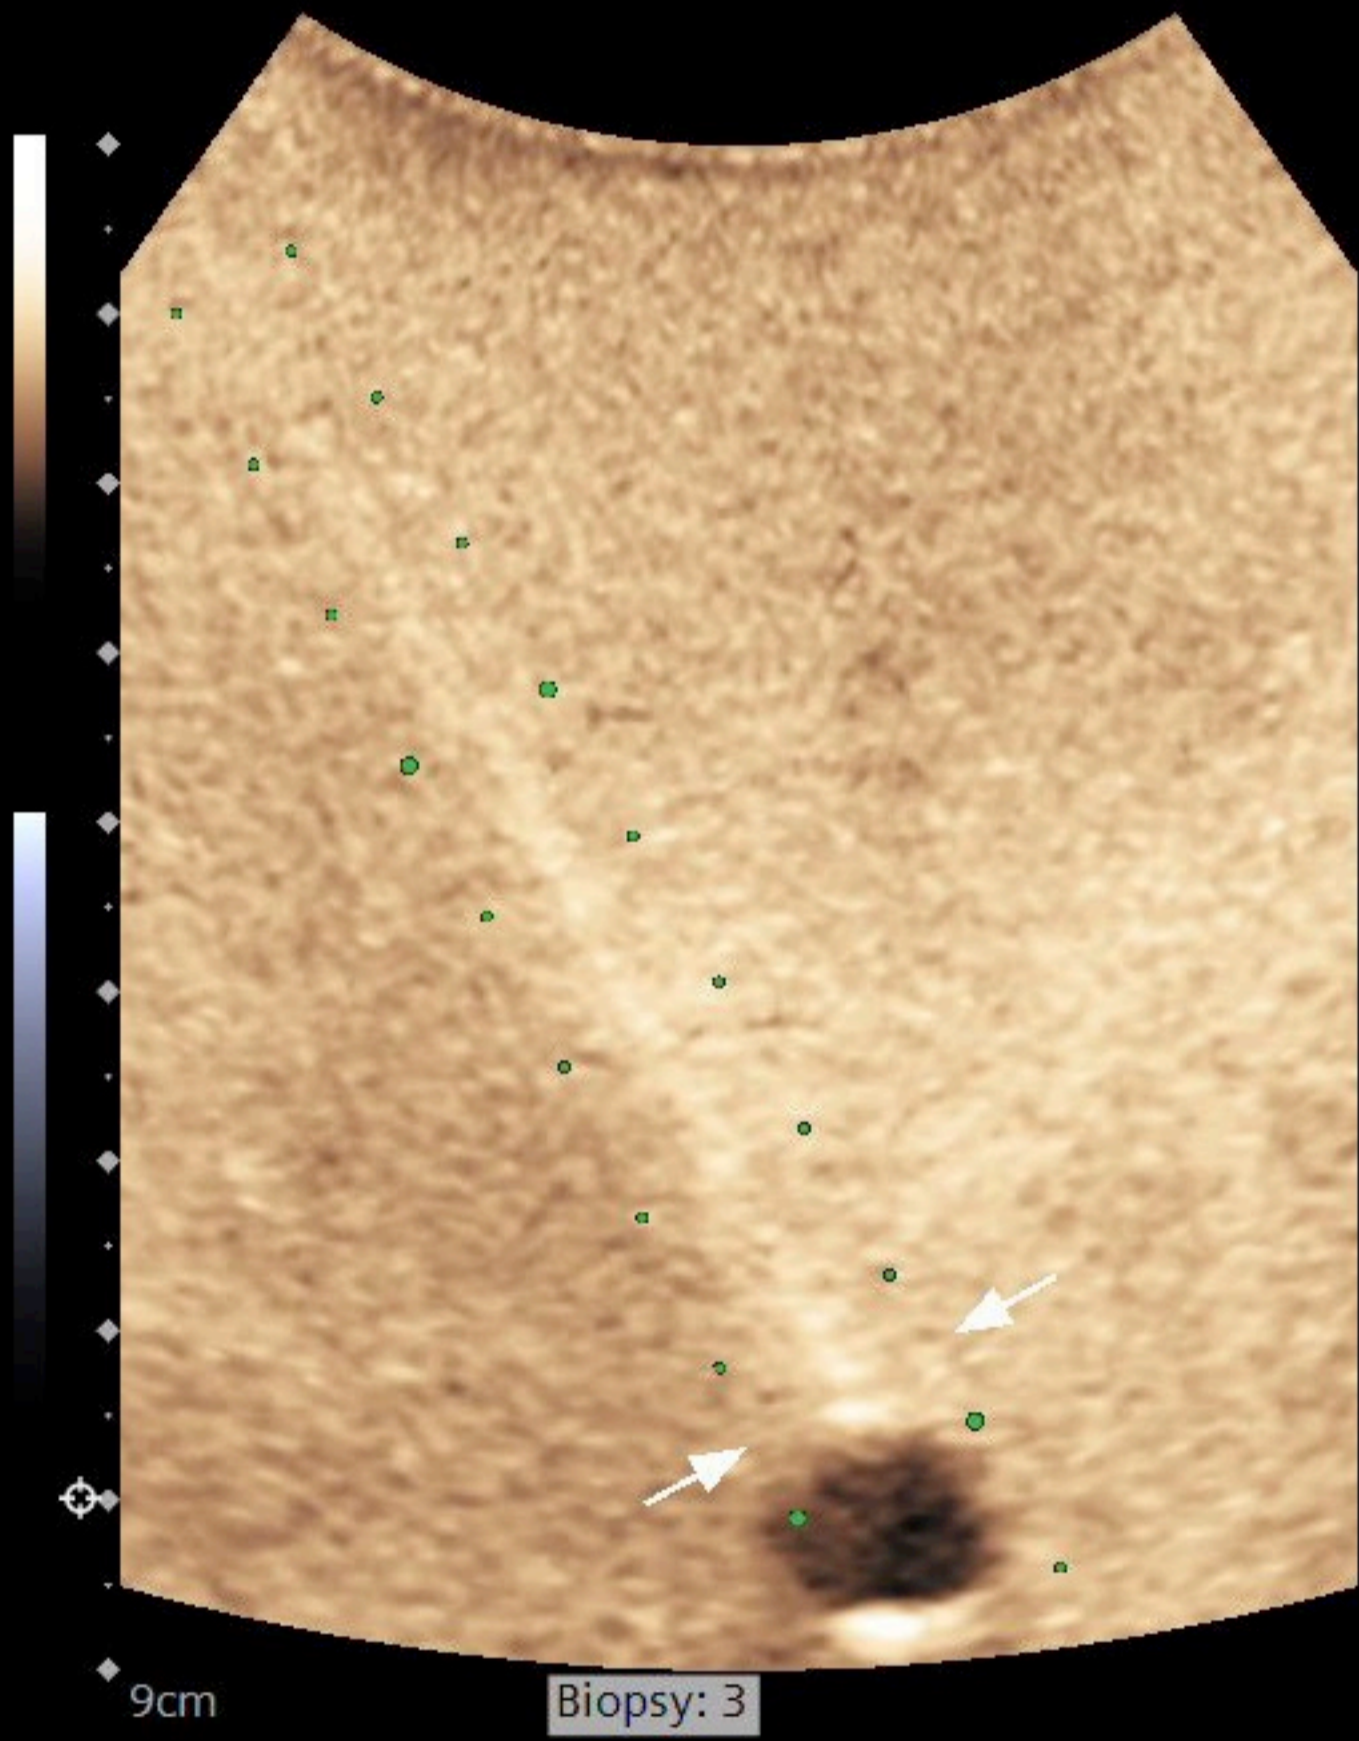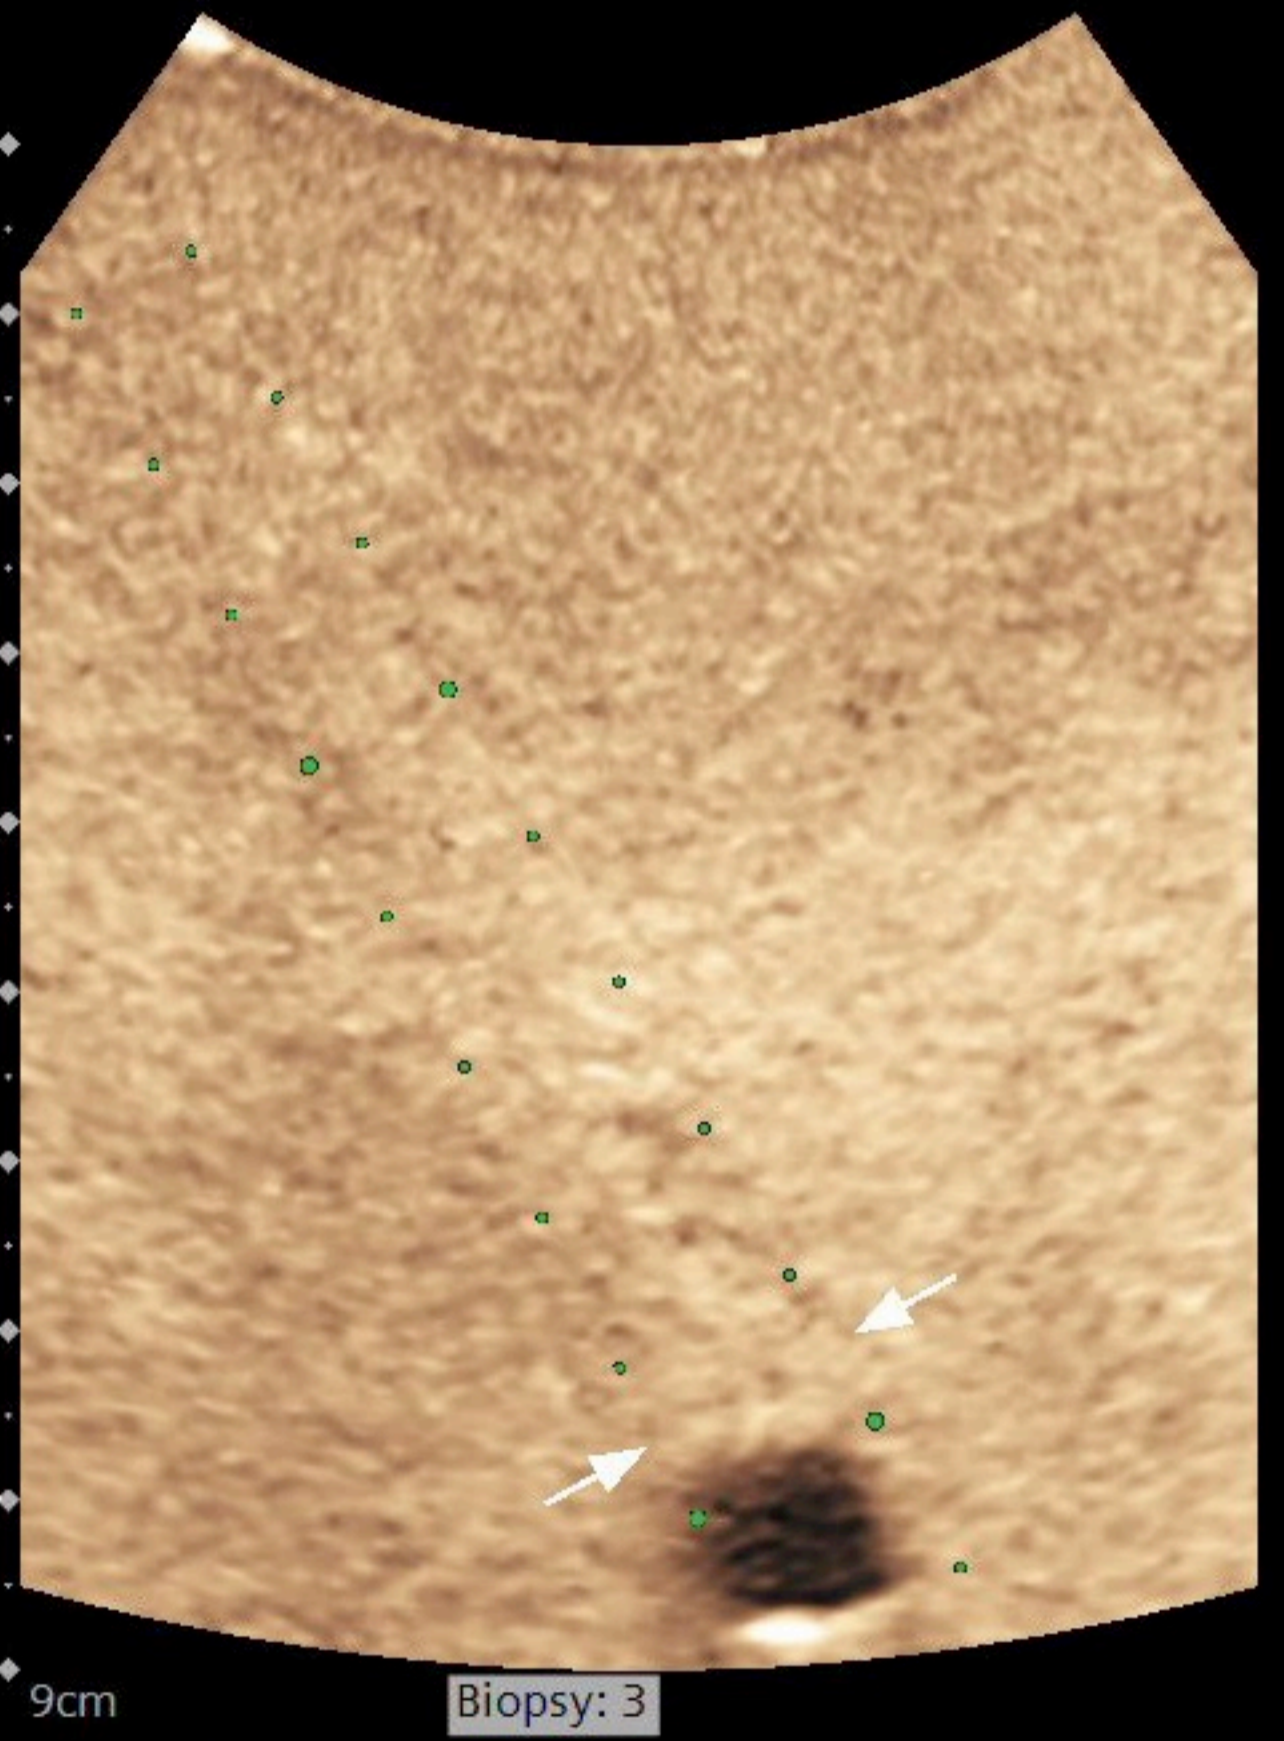

2nd puncture

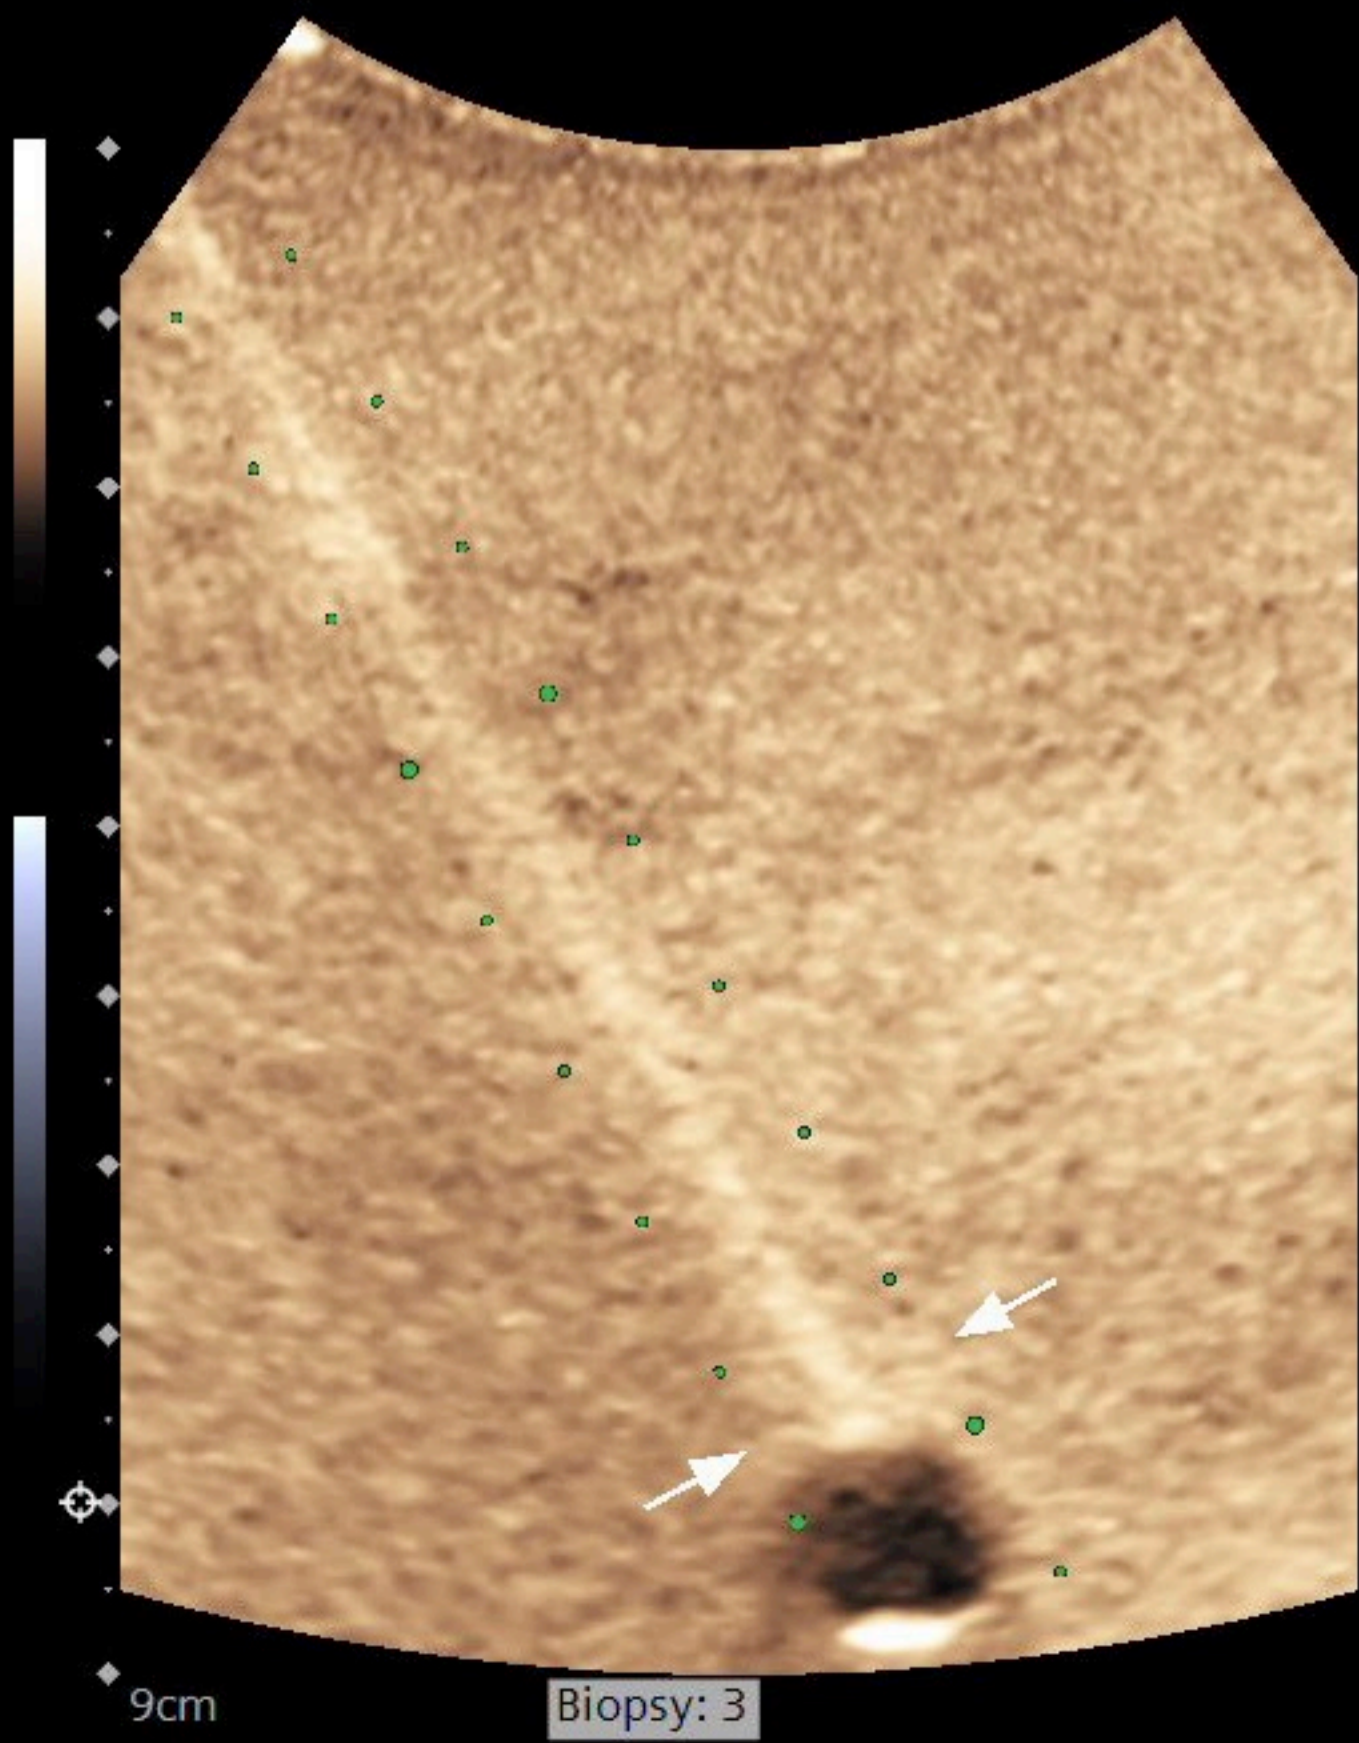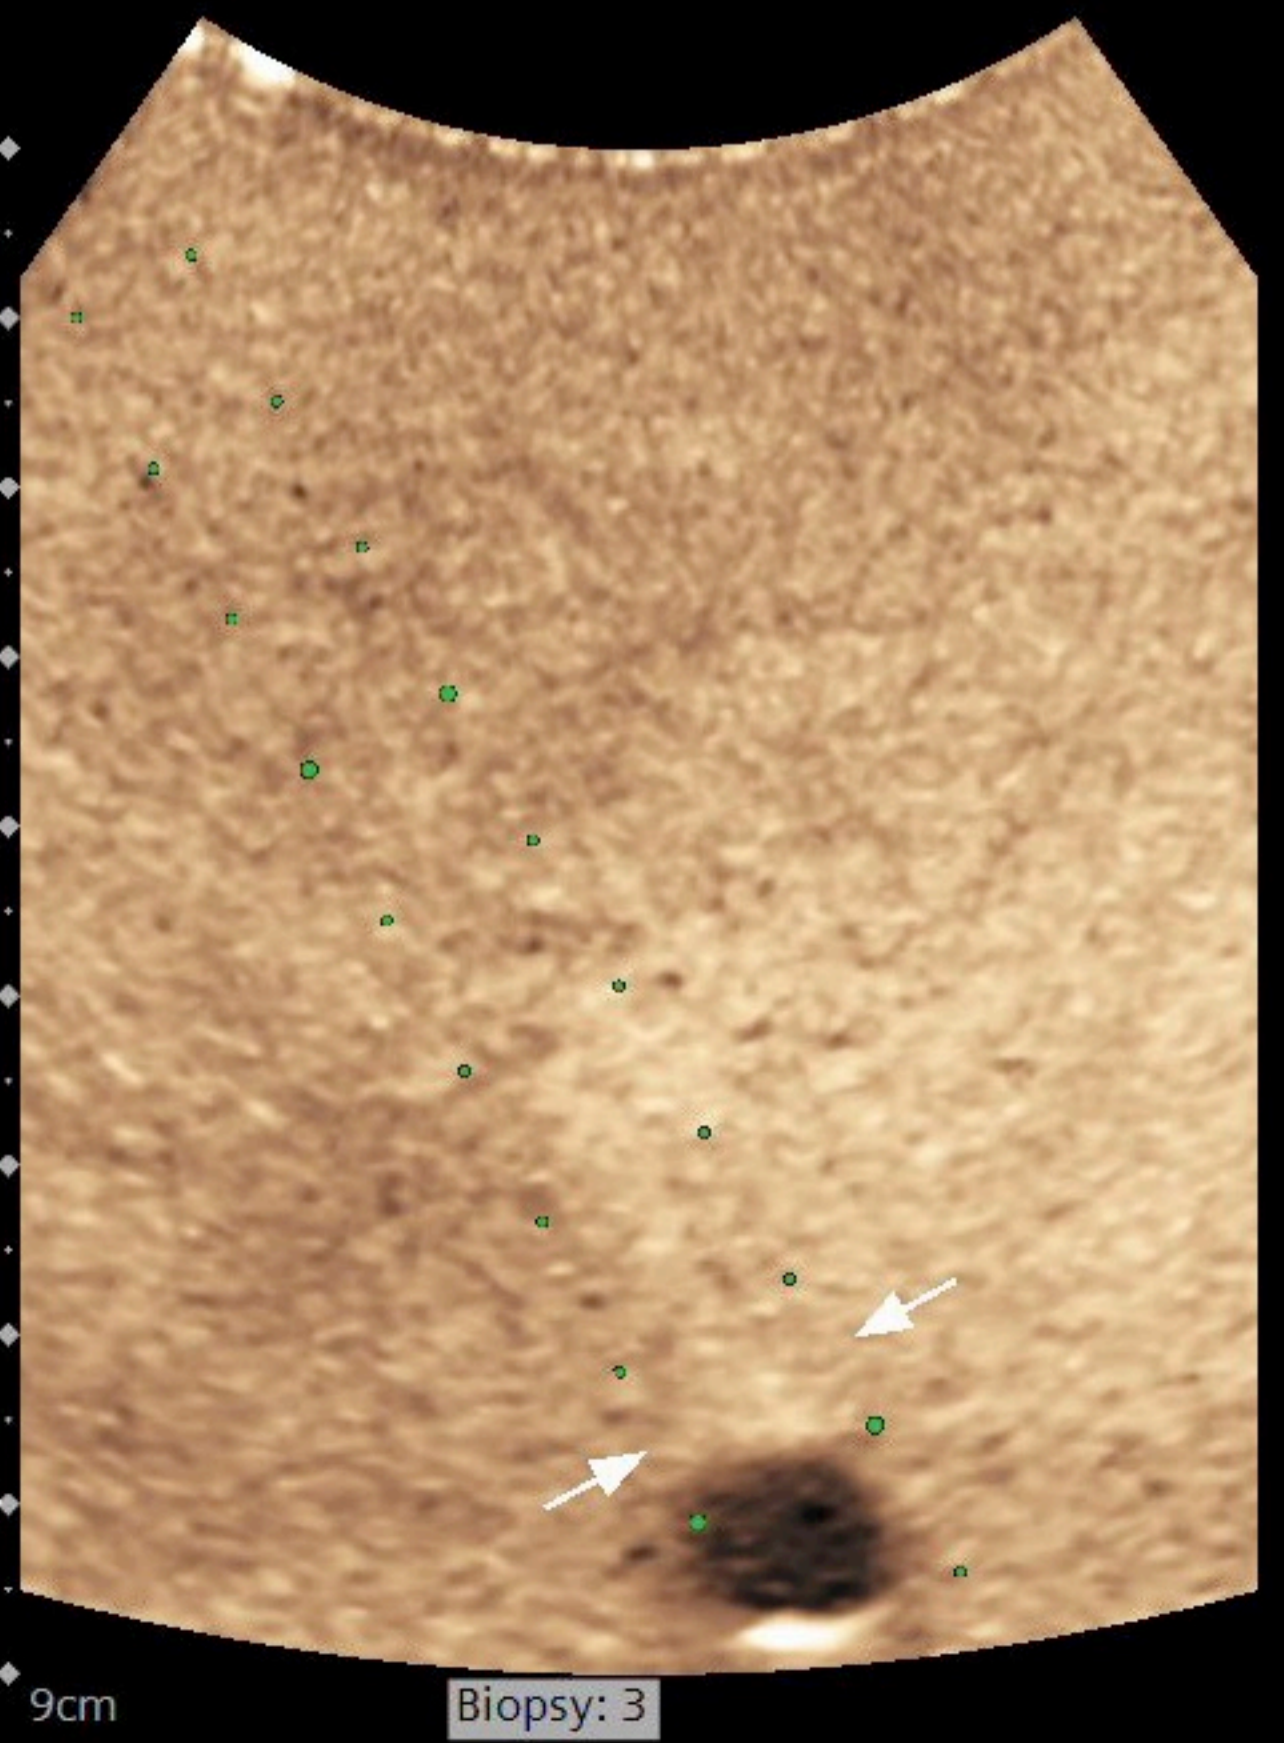

3rd puncture

Ultrasound contrast agent

Control



Introducer needle (set 3/10)

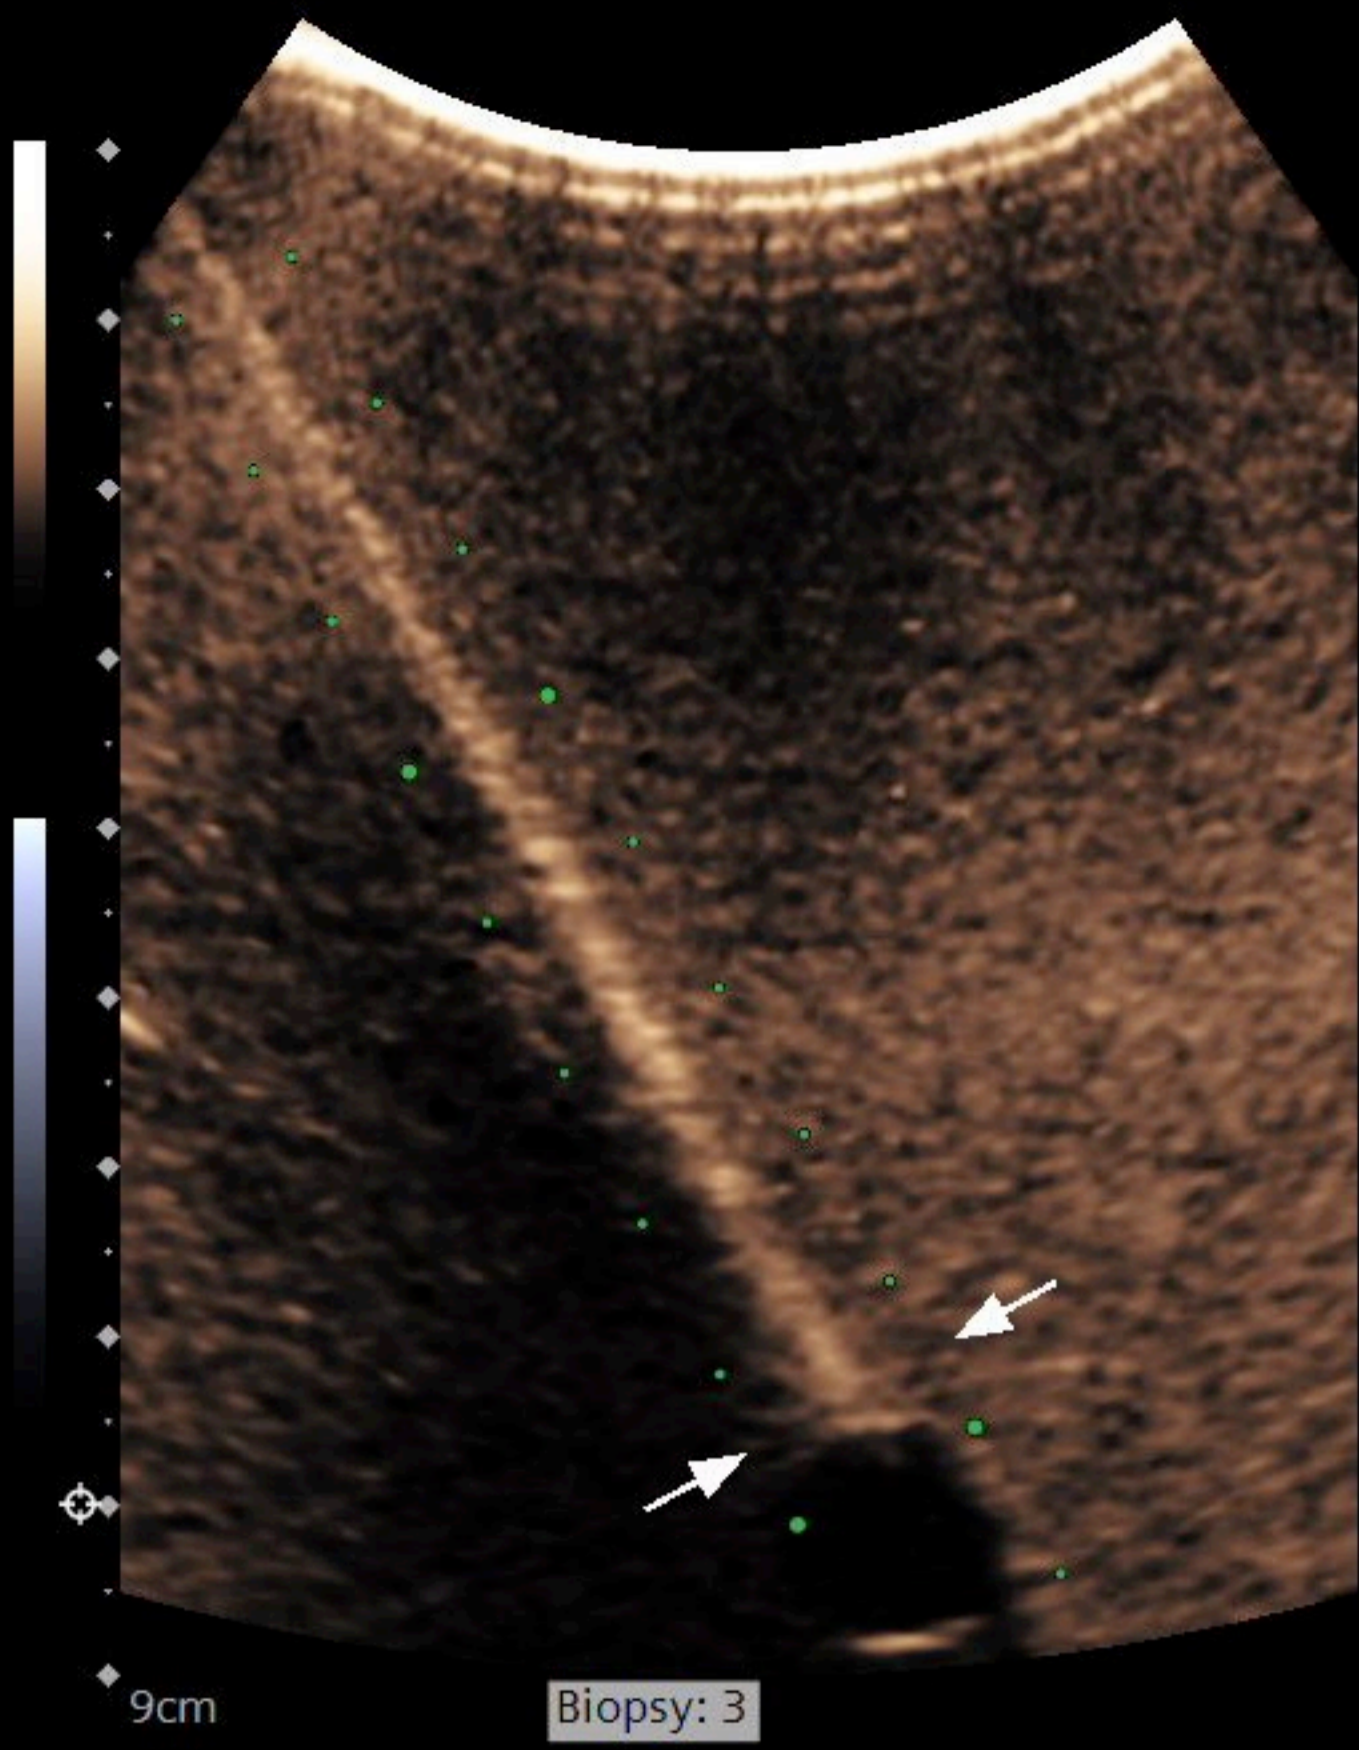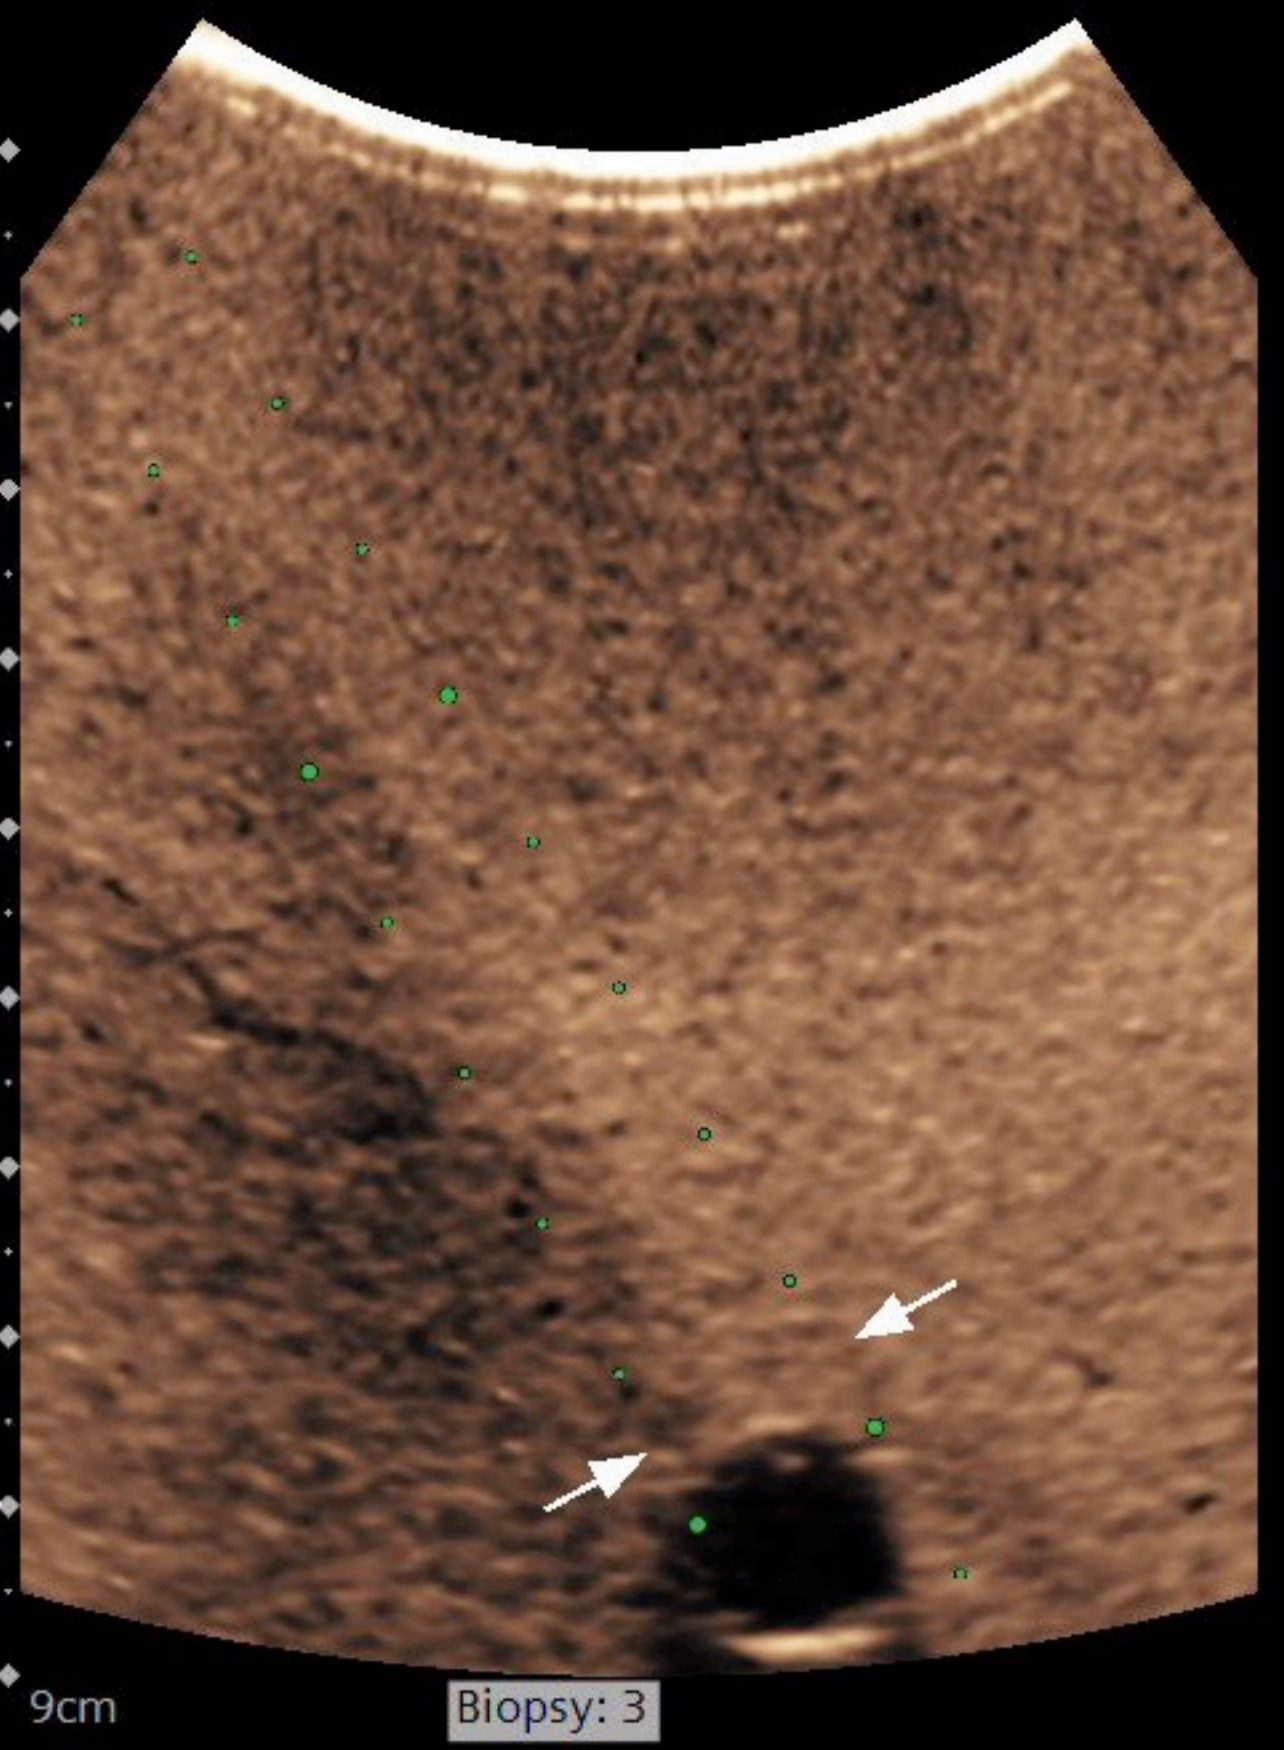

1st puncture

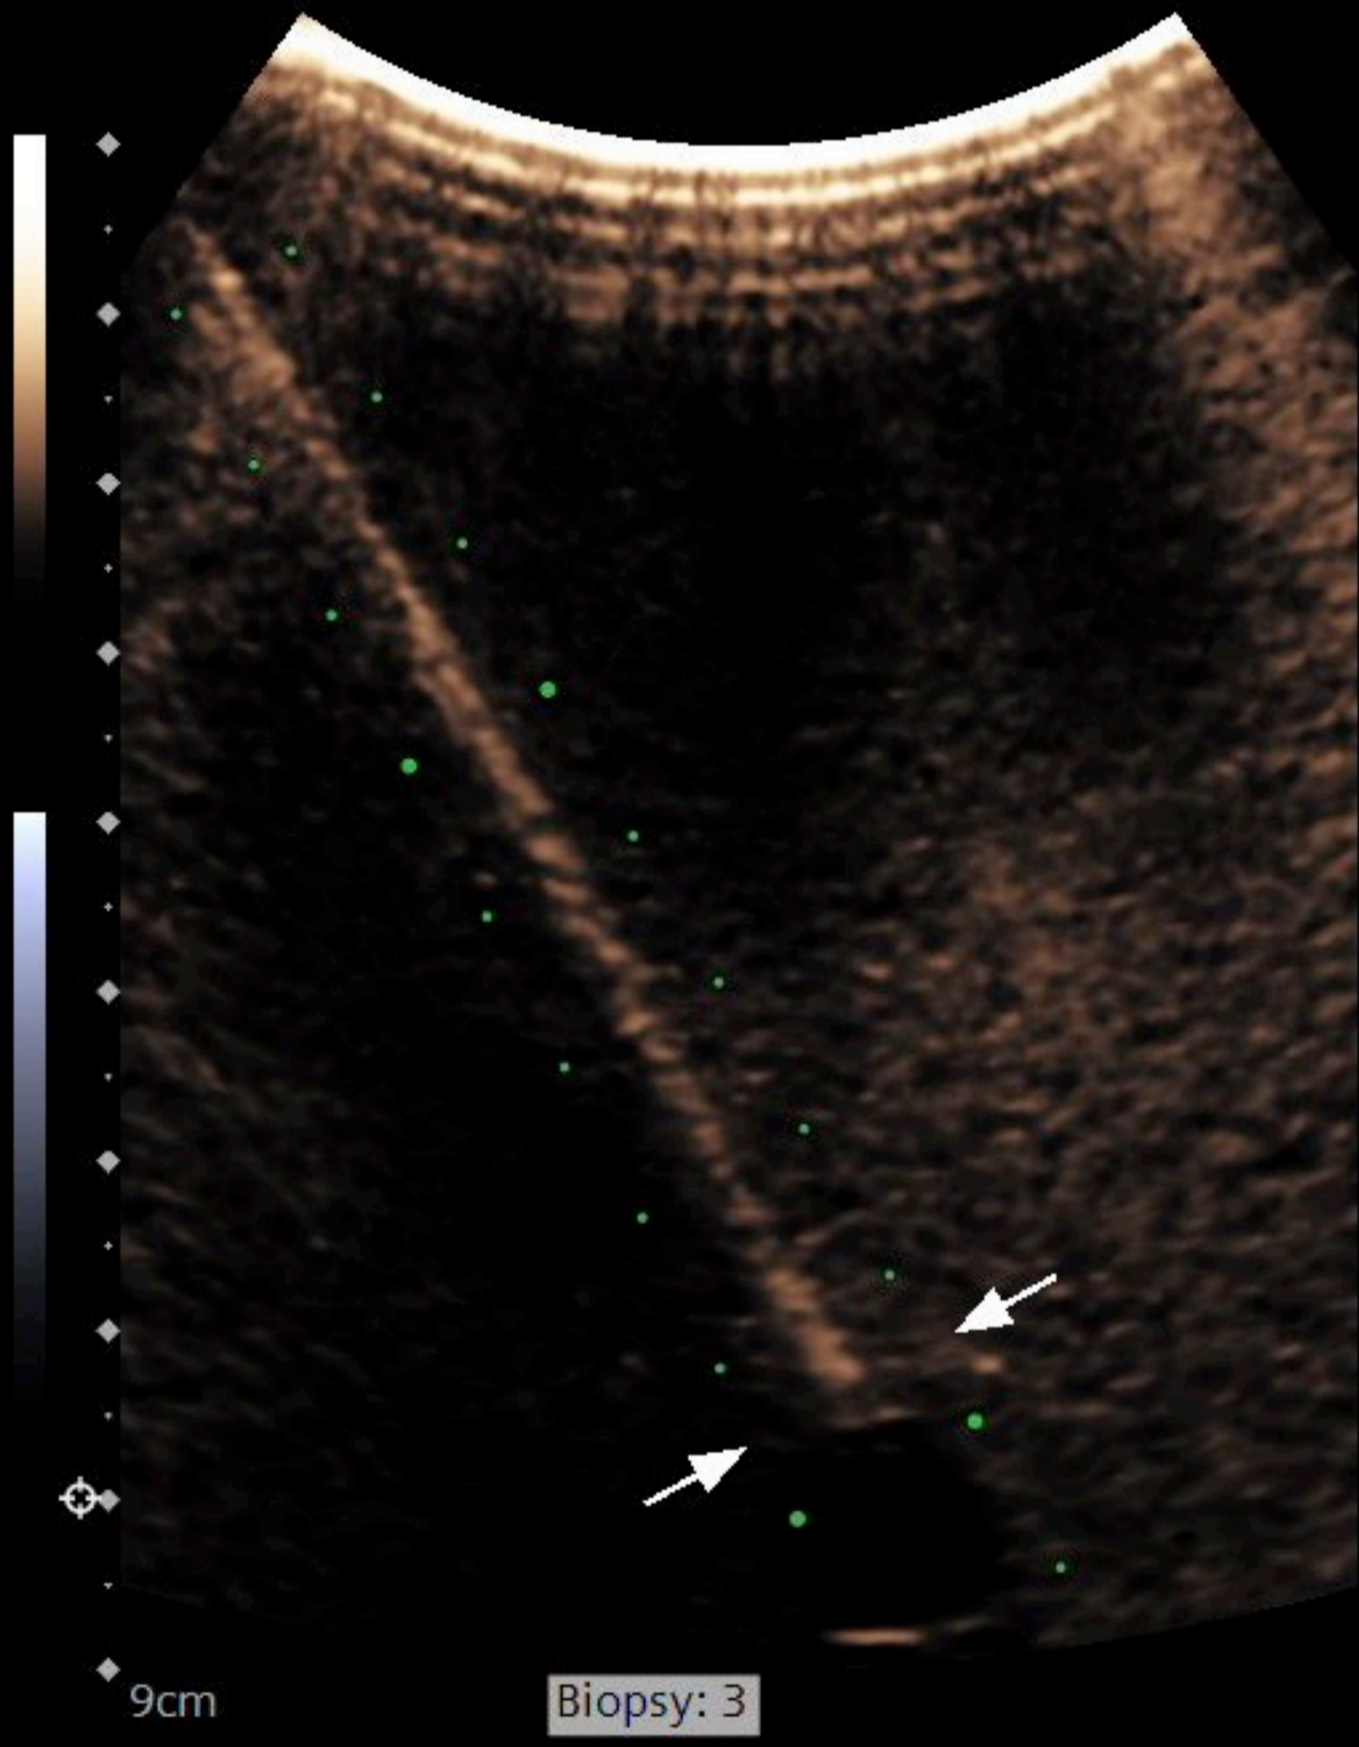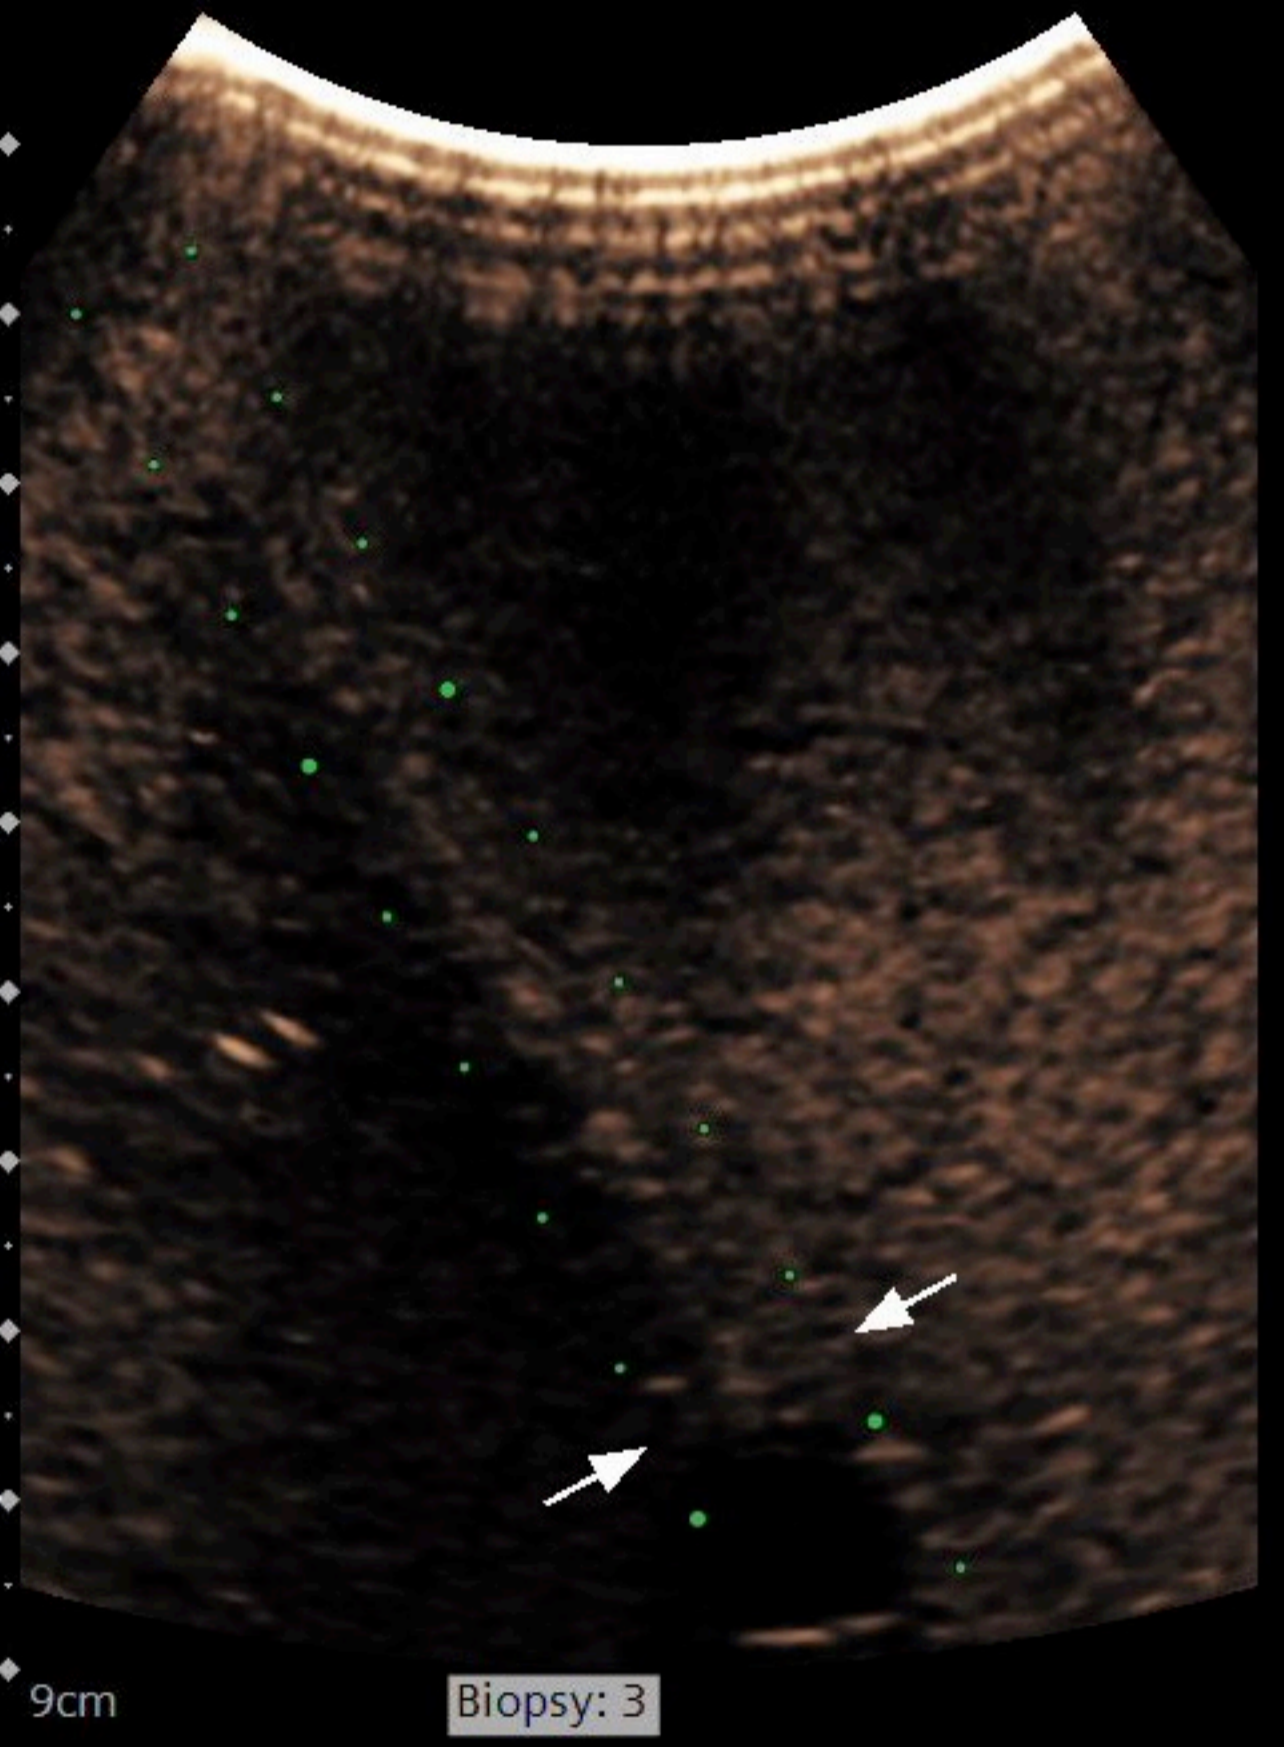

2nd puncture

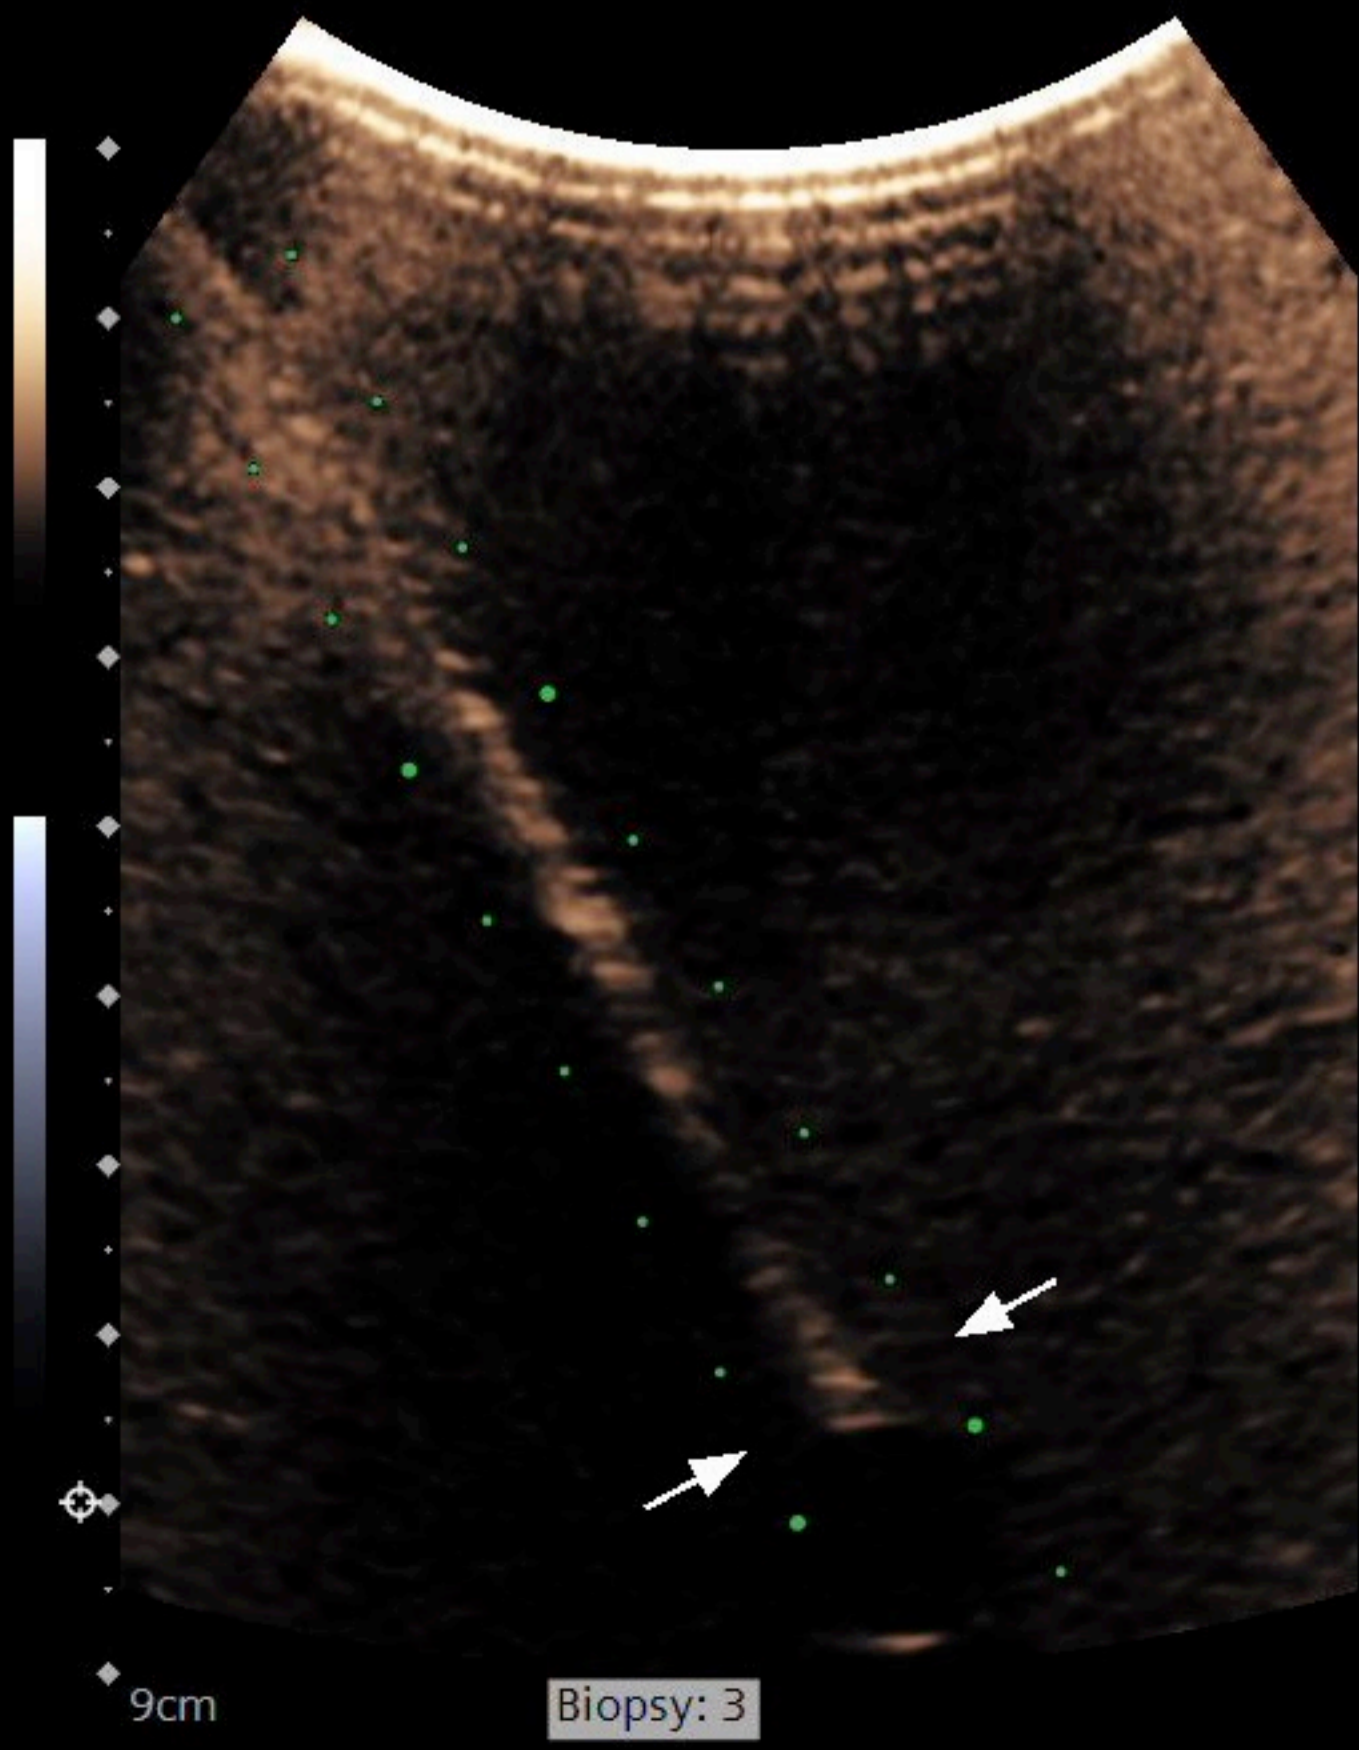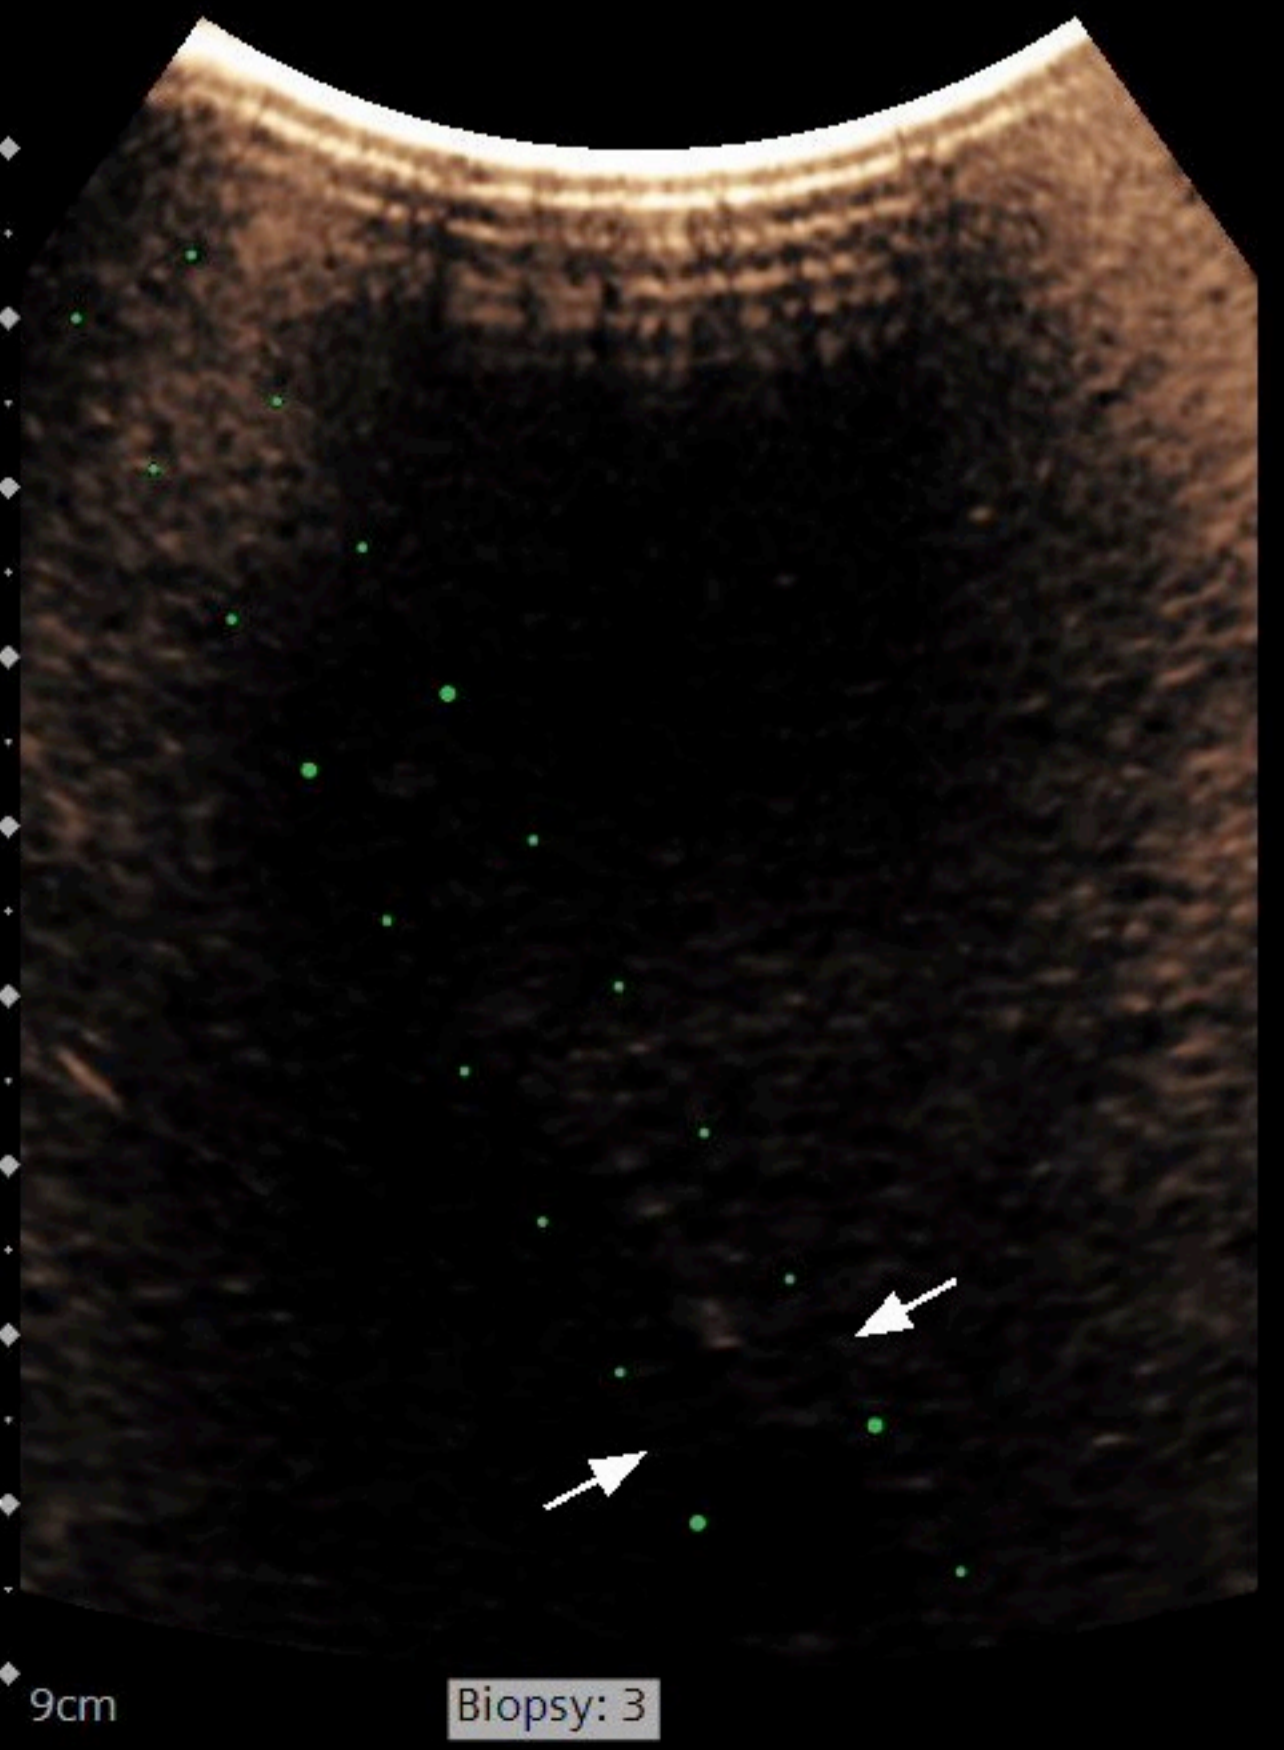

3rd puncture

Ultrasound contrast agent

Control



Introducer needle (set 4/10)

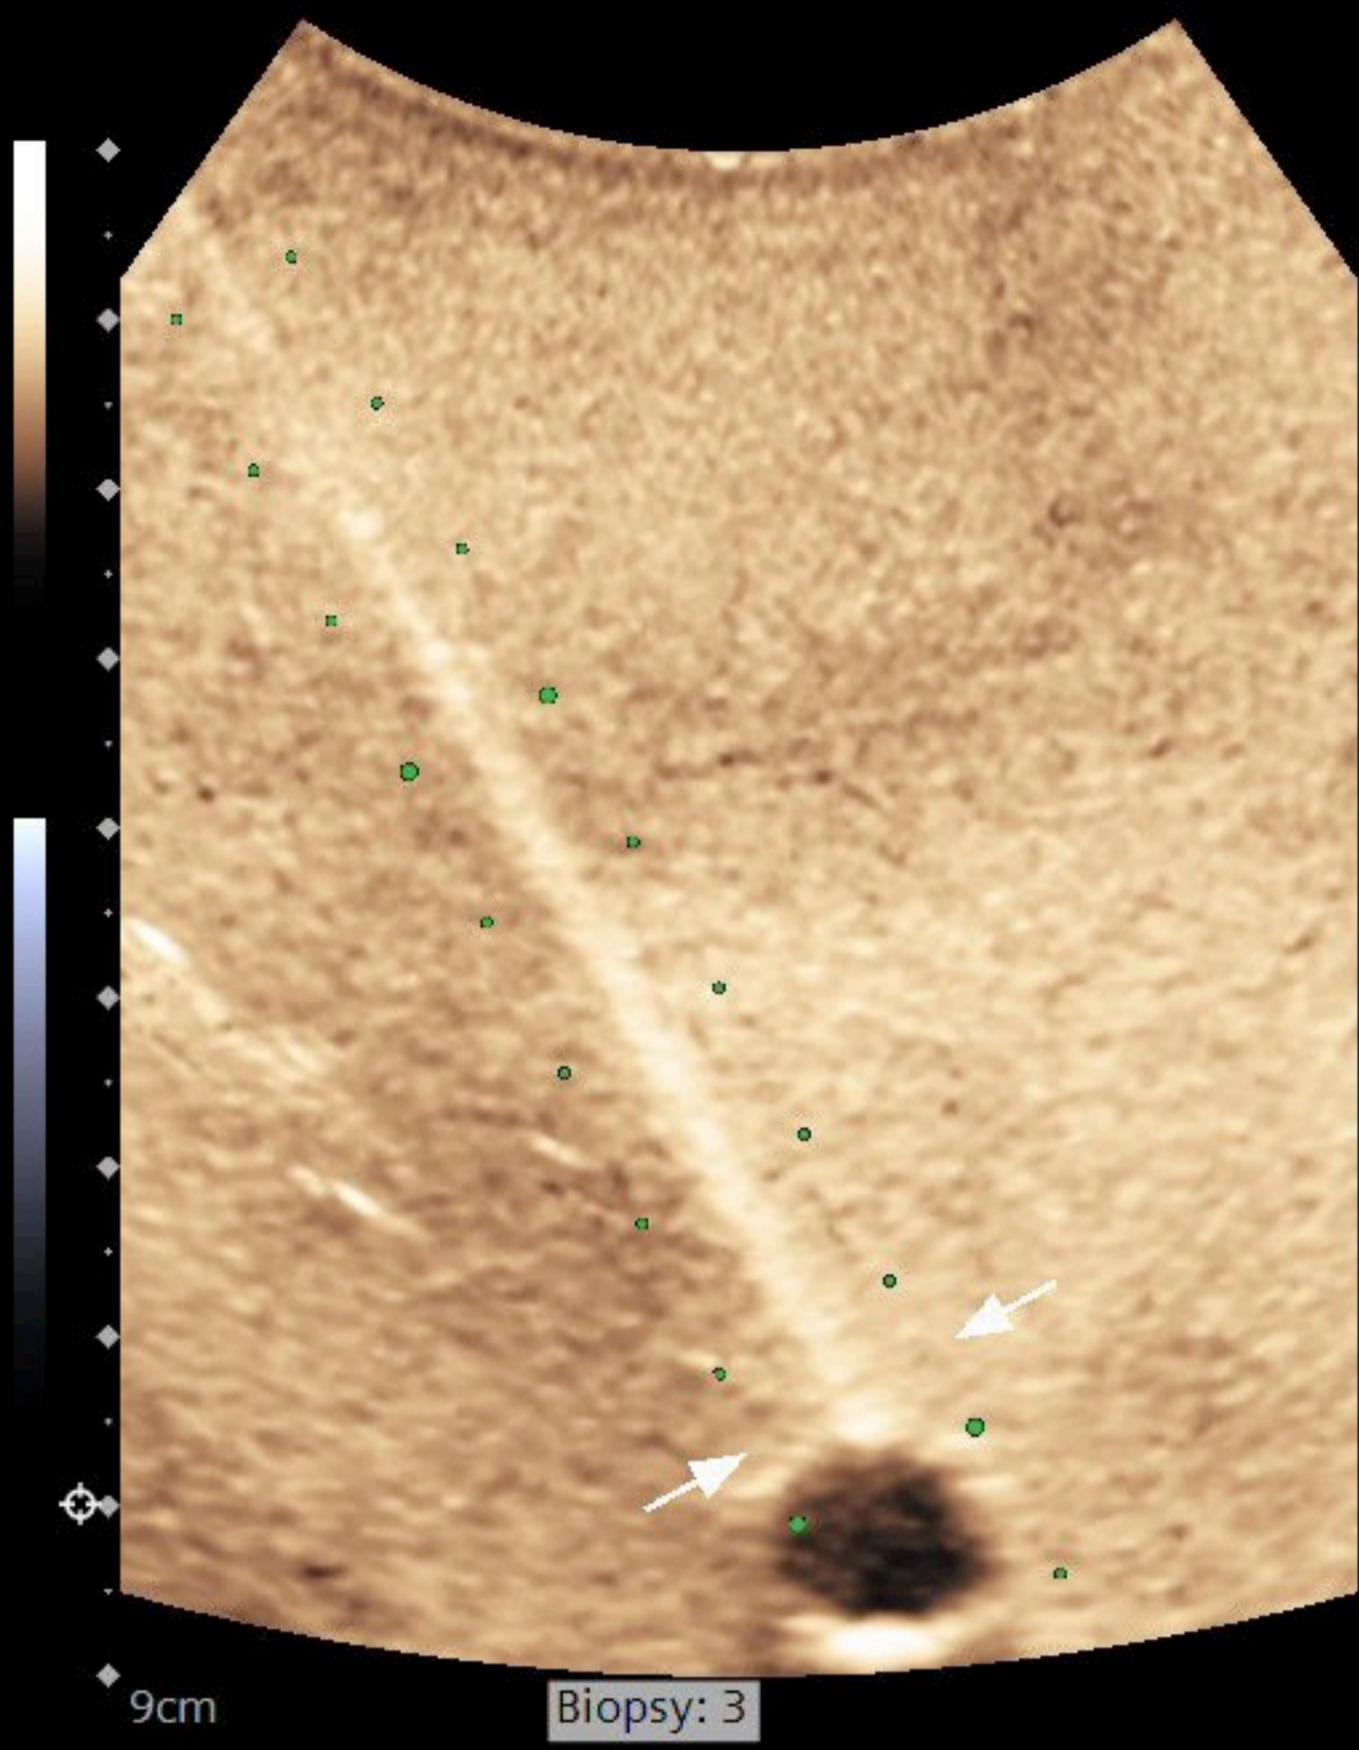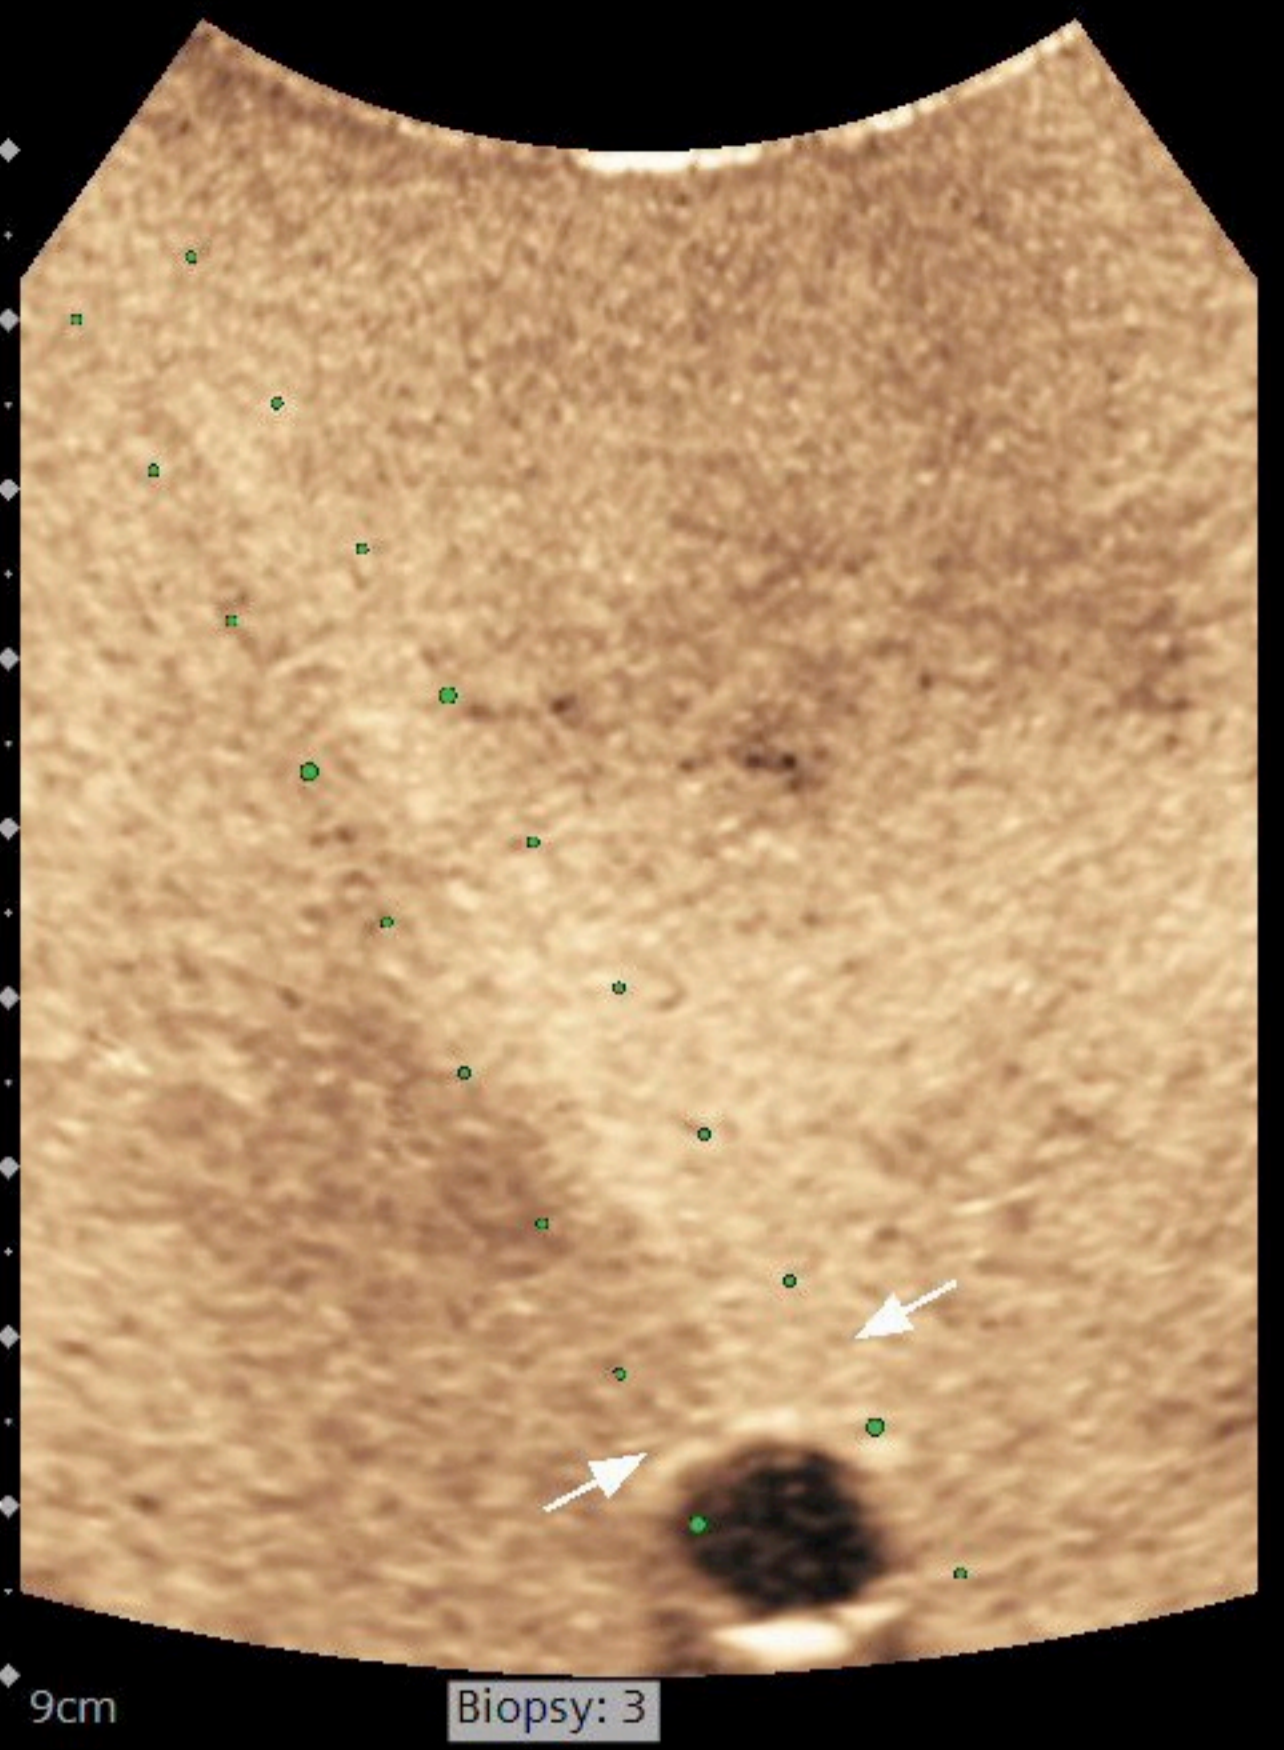

1st puncture

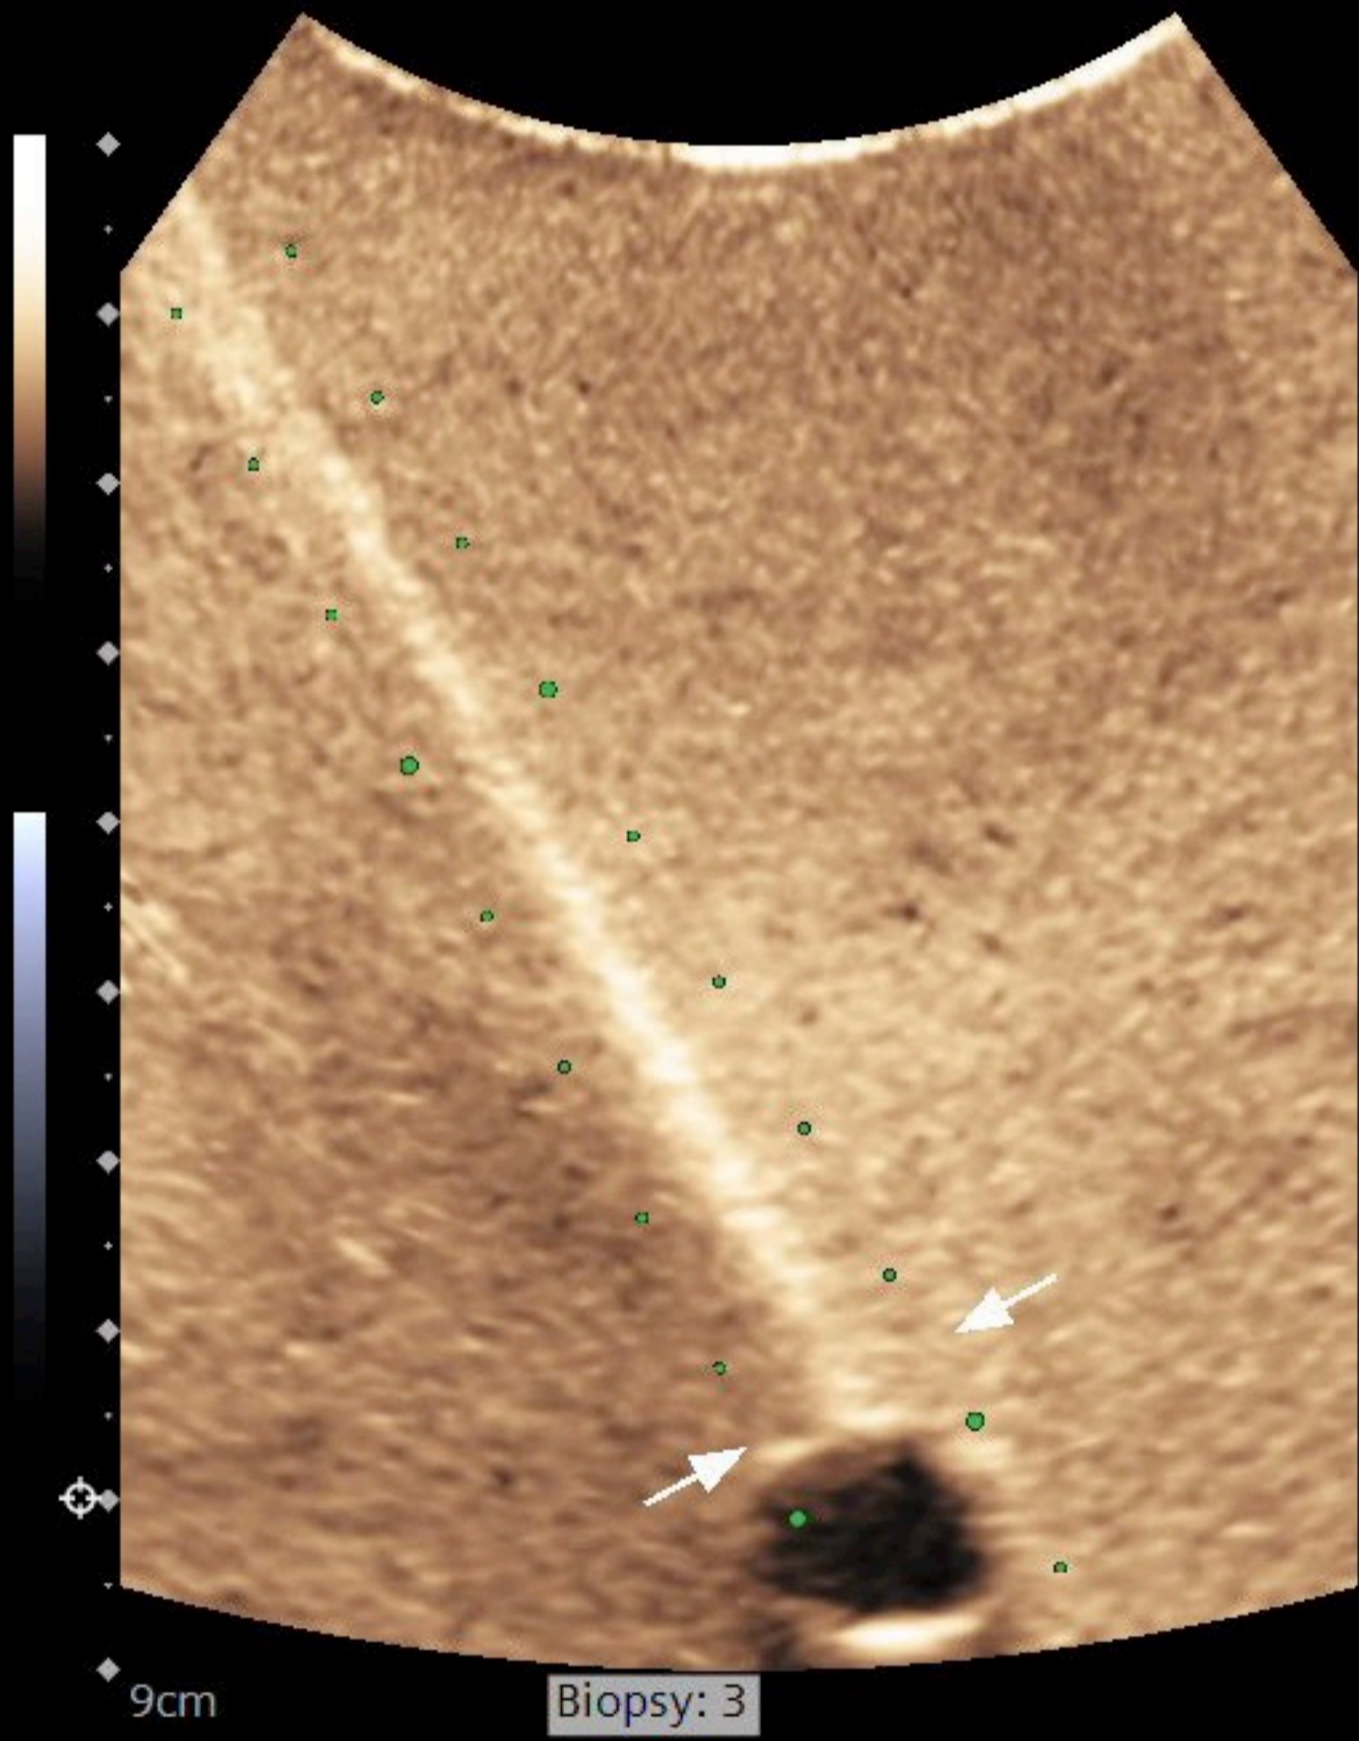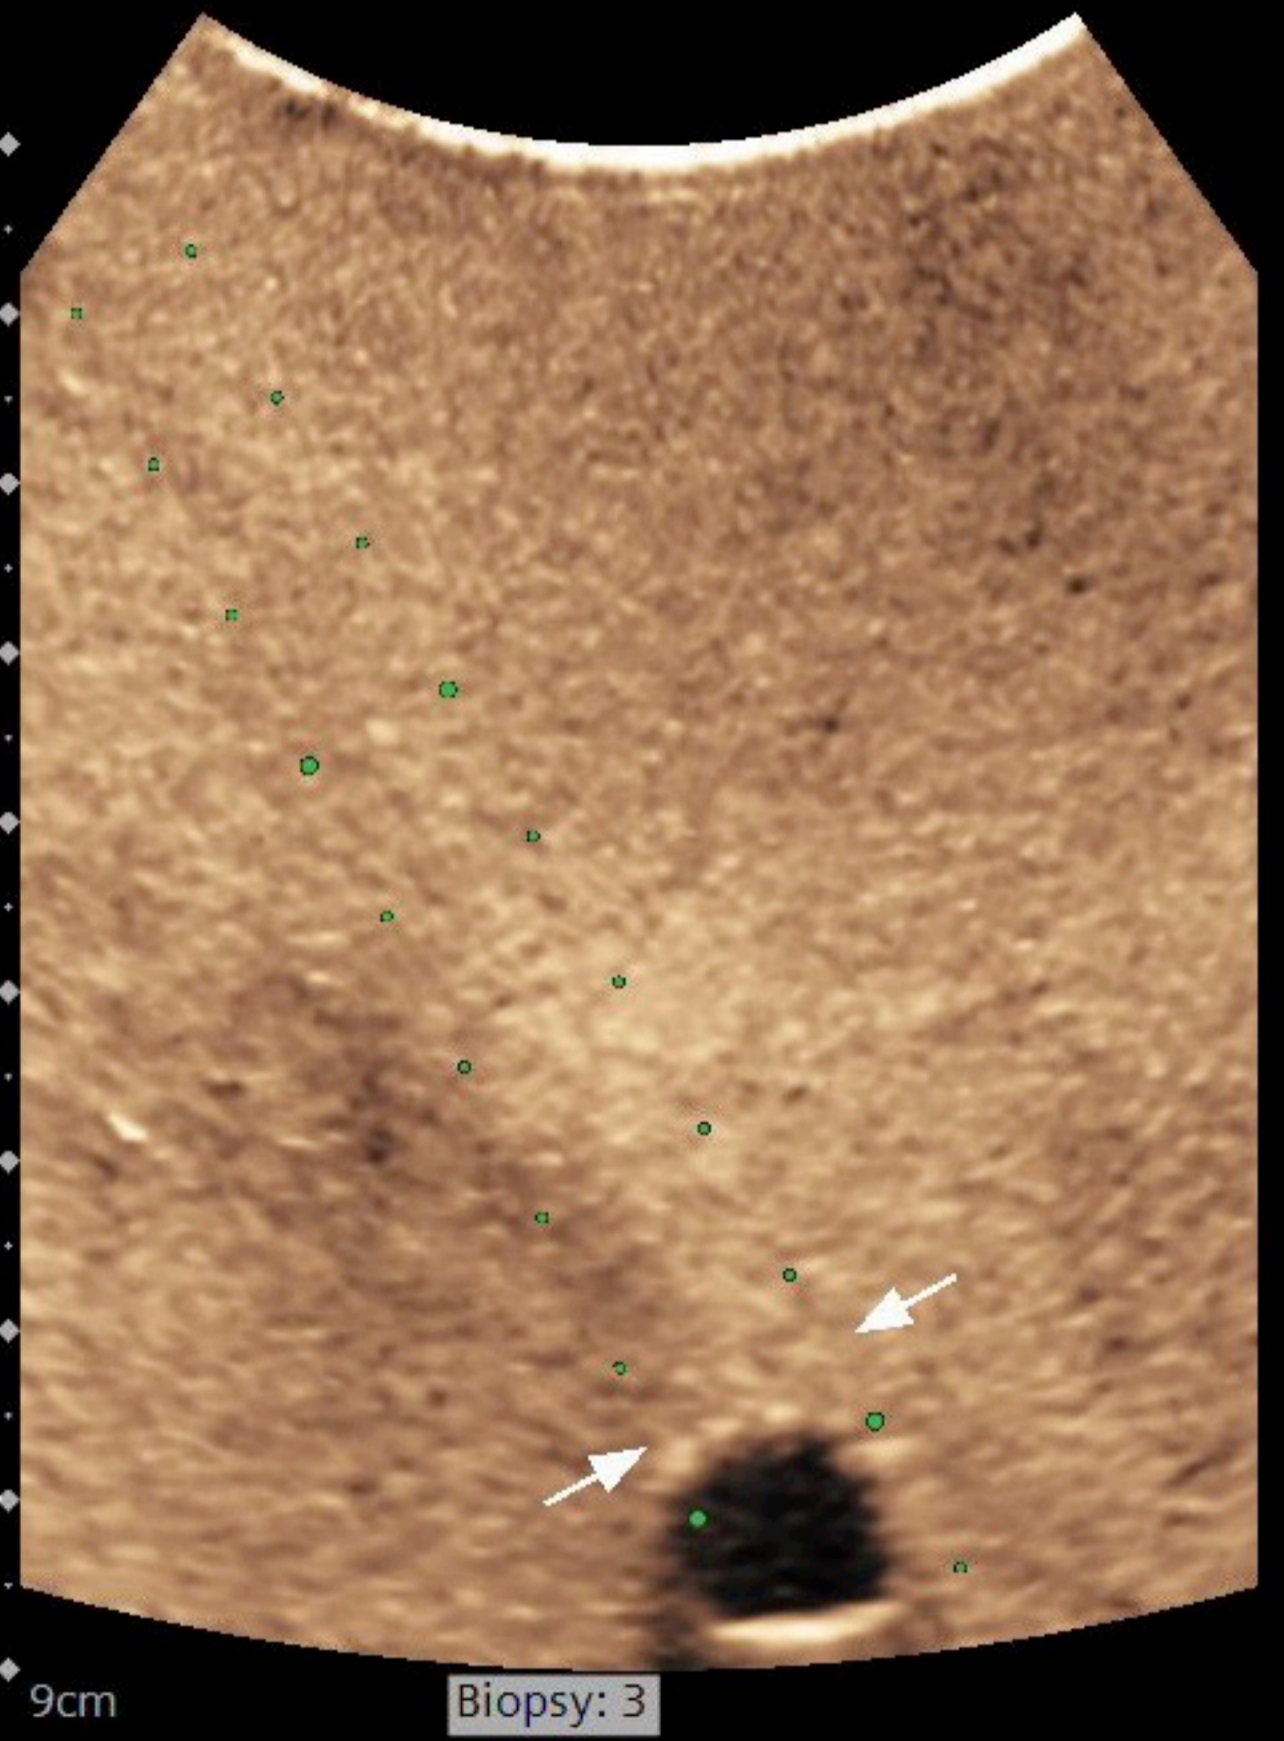

2nd puncture

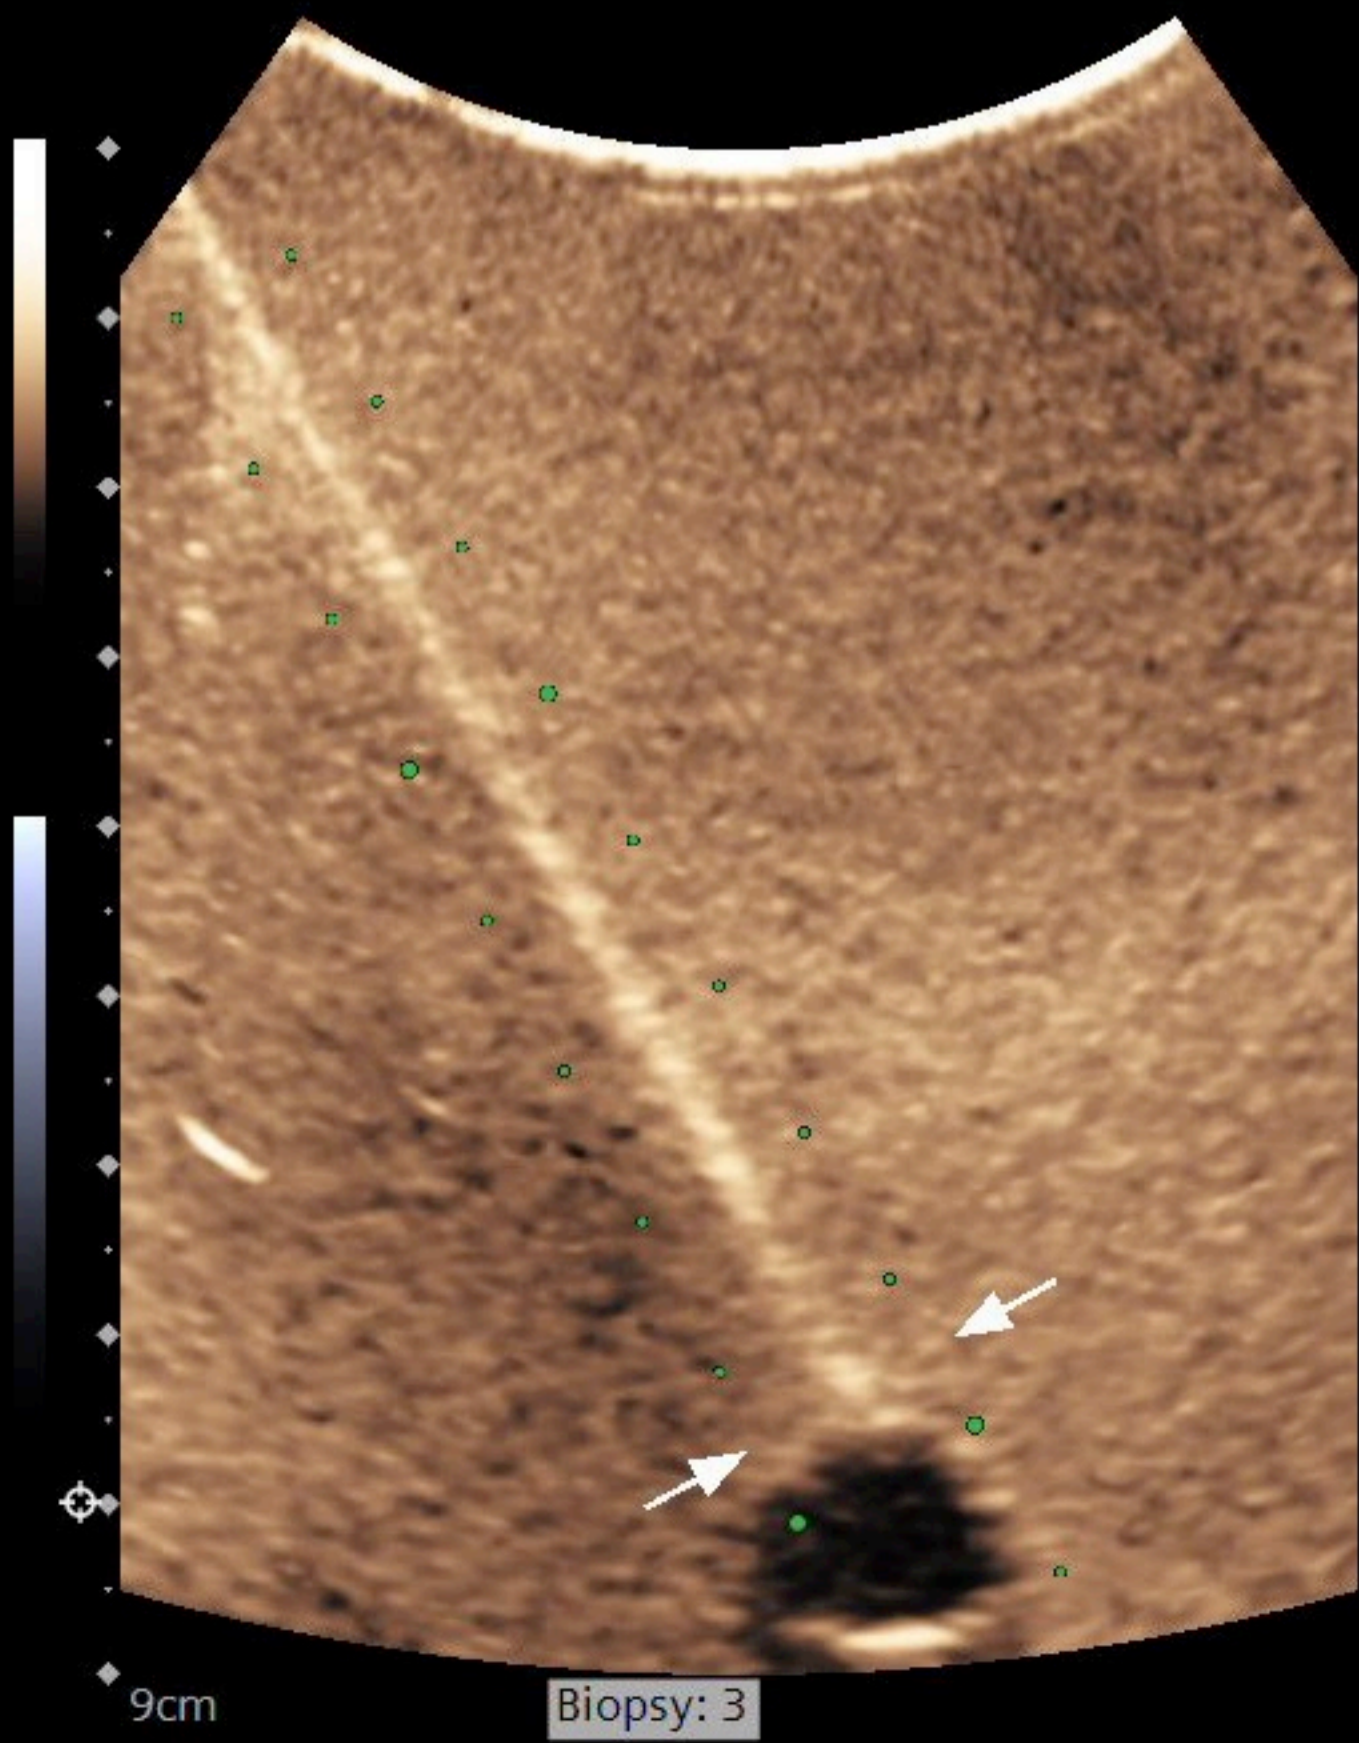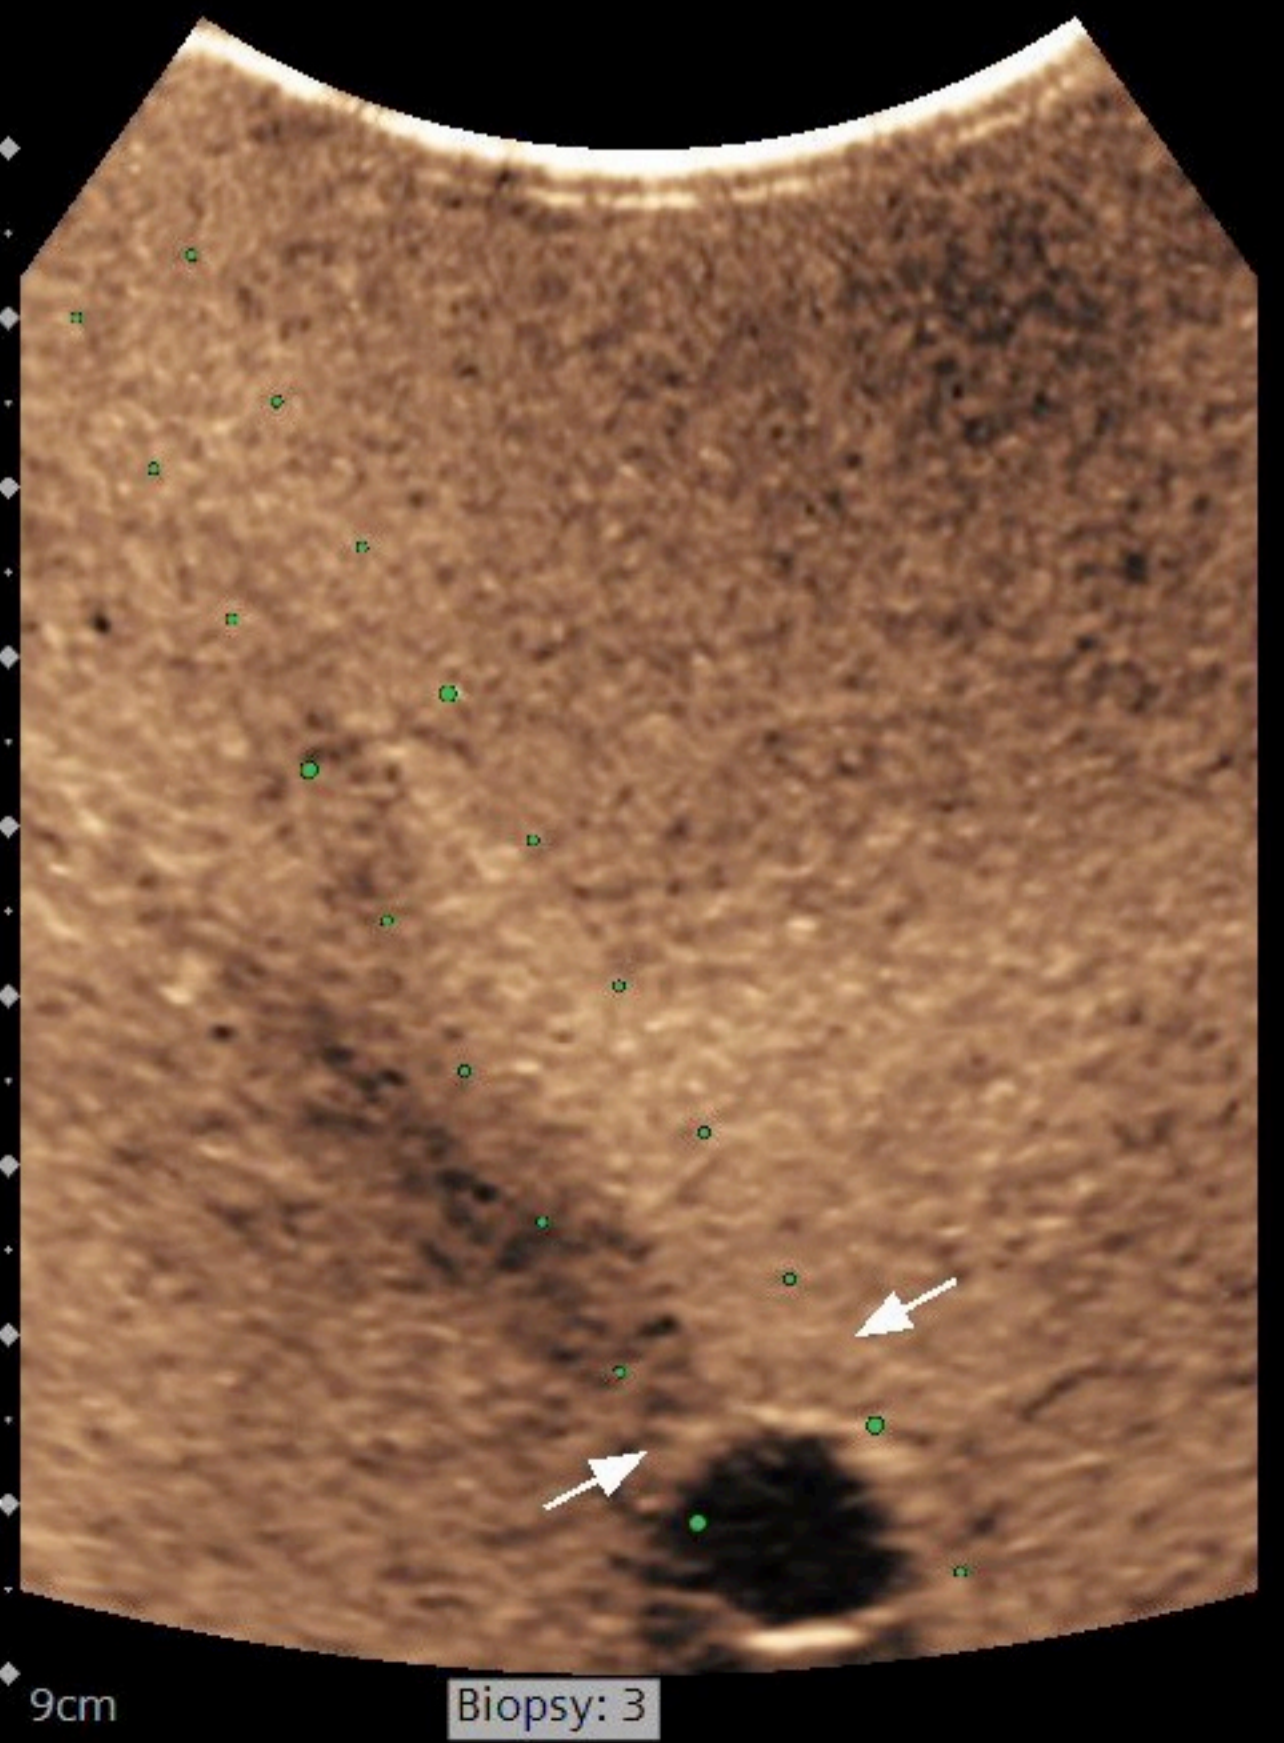

3rd puncture

Ultrasound contrast agent

Control



Introducer needle (set 5/10)

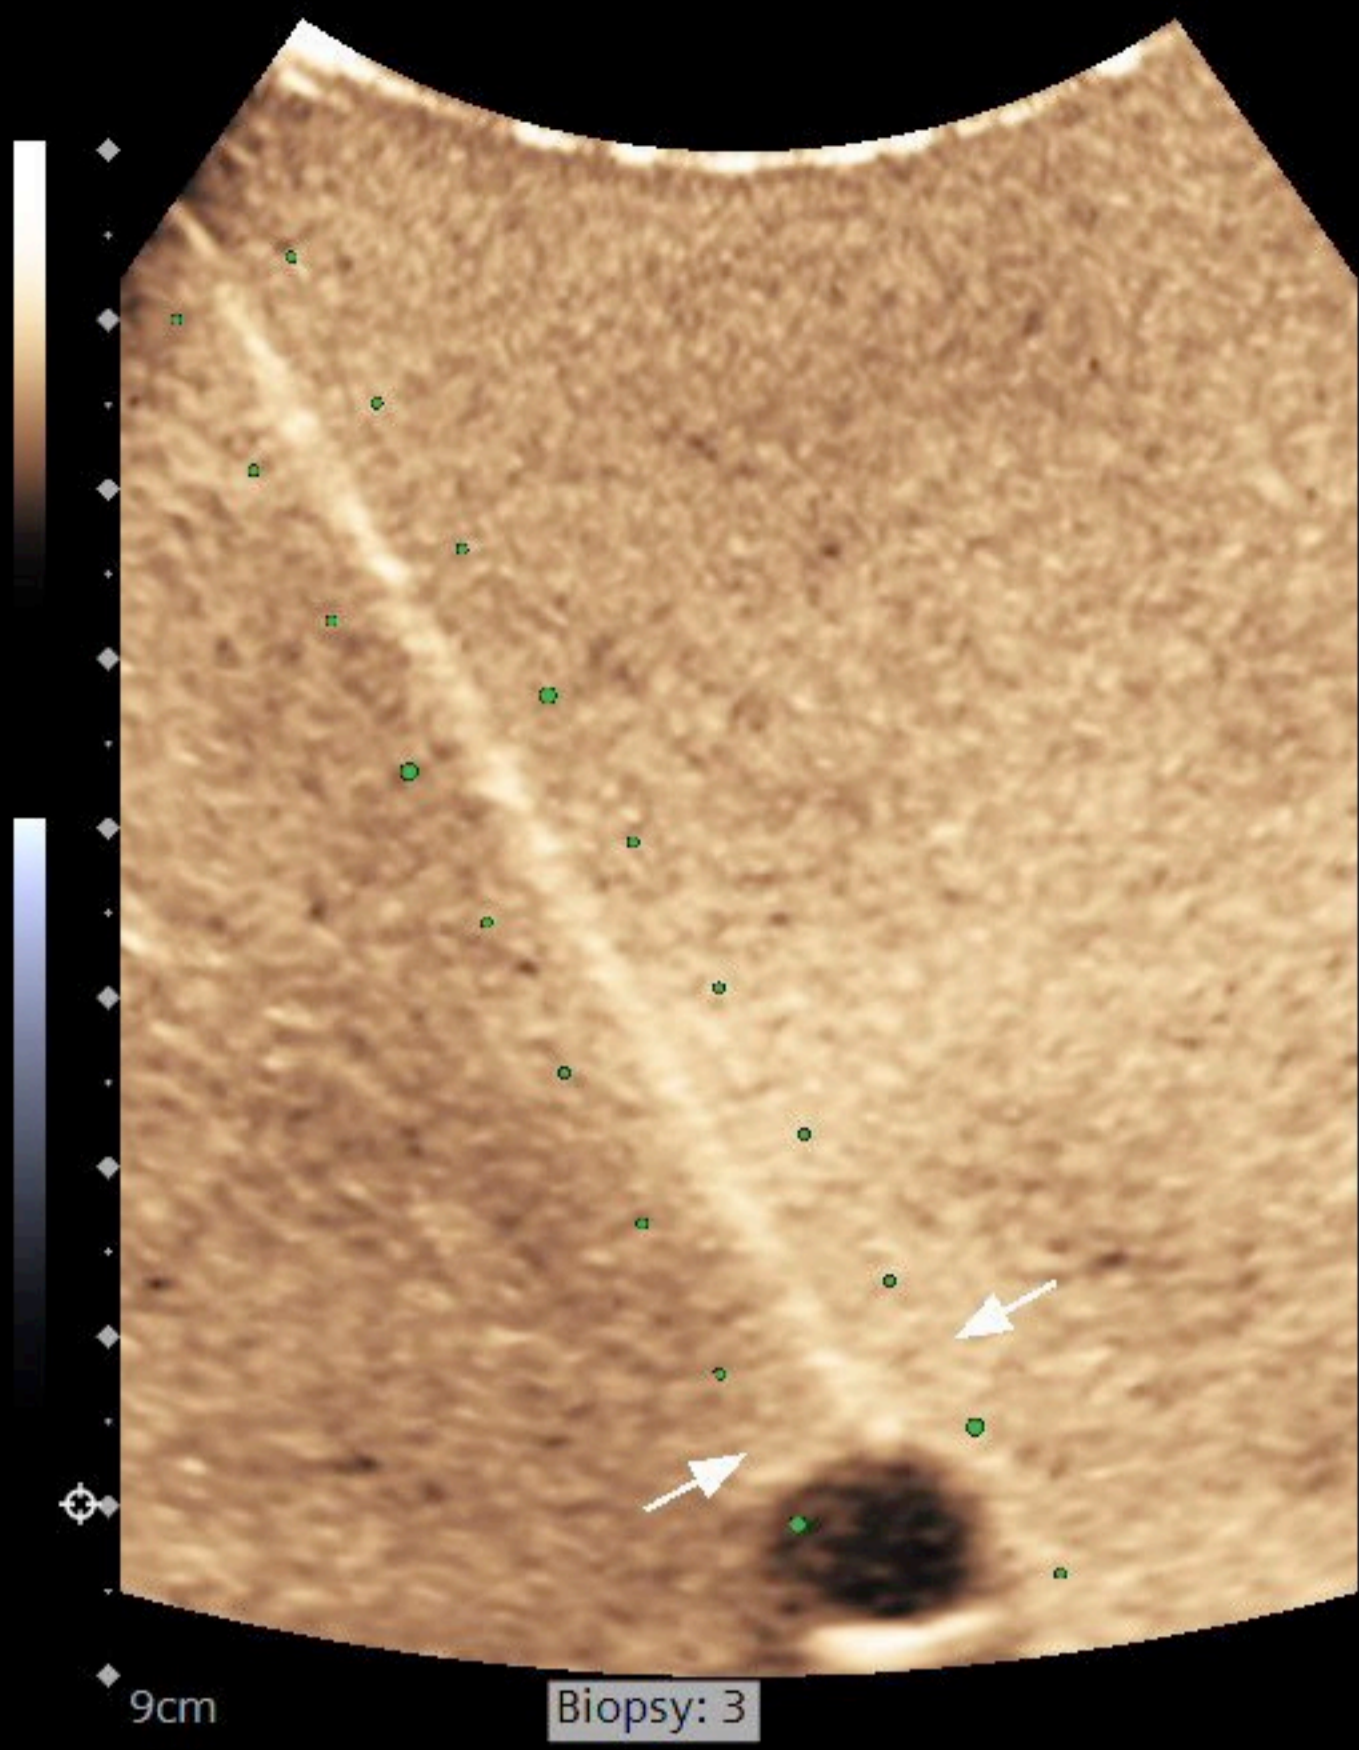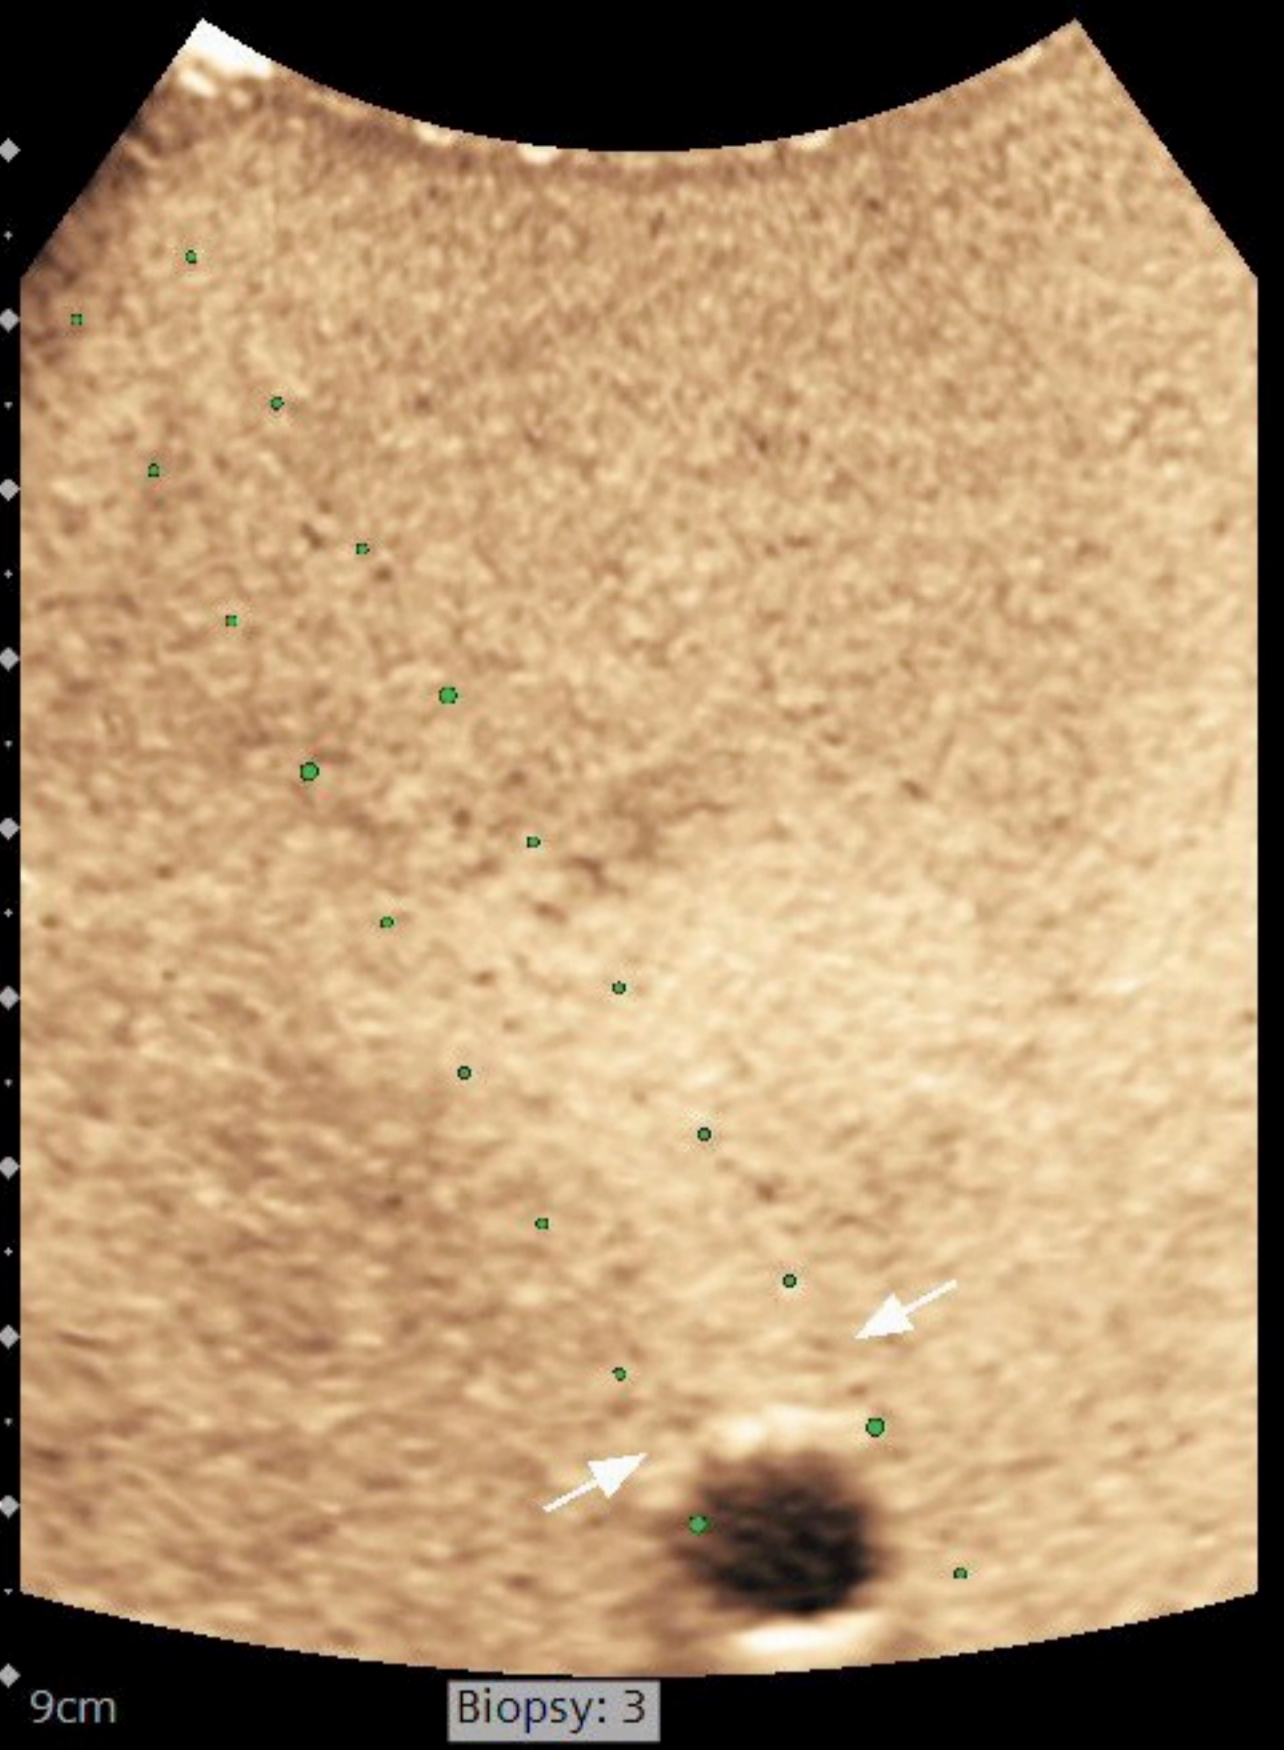

1st puncture

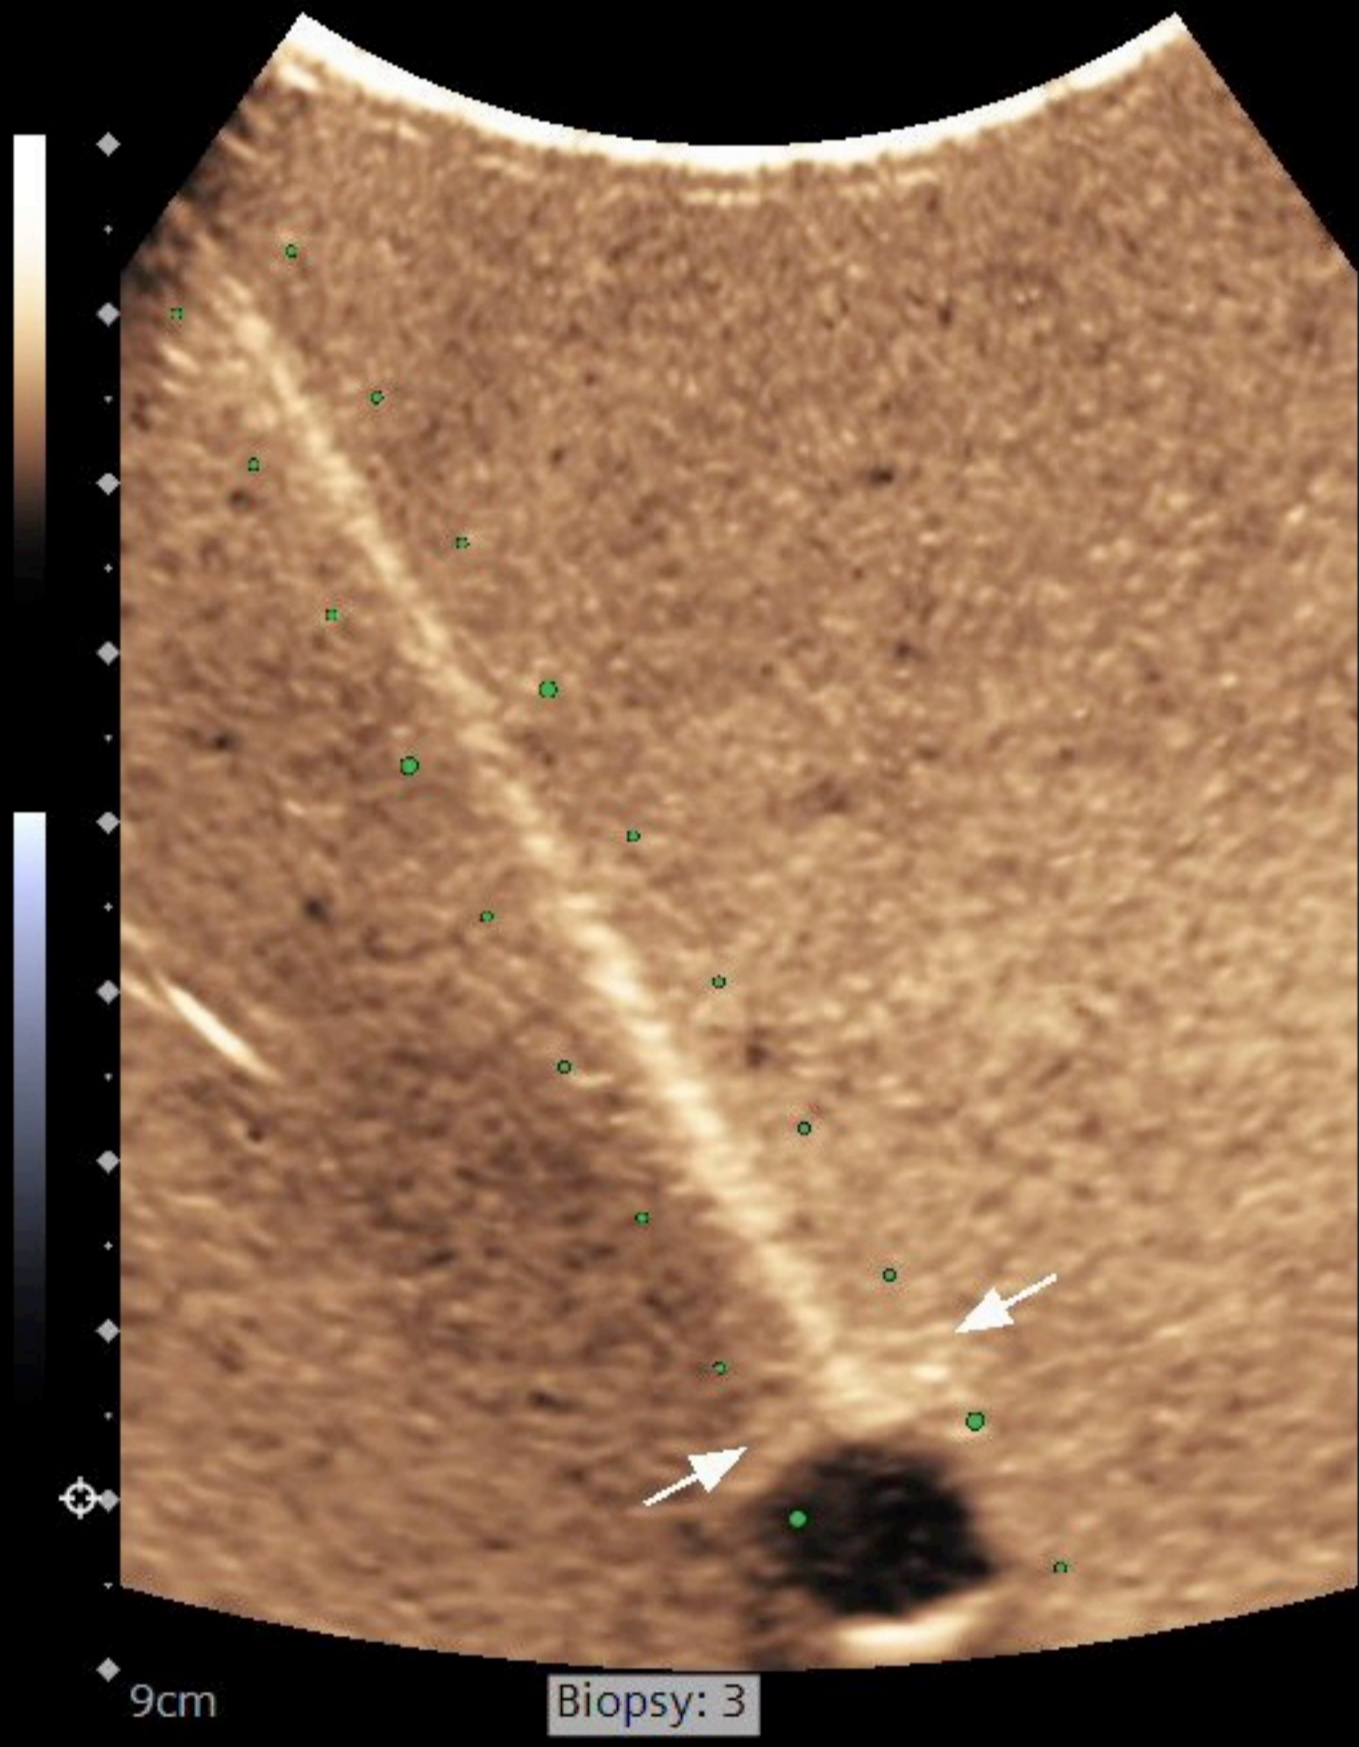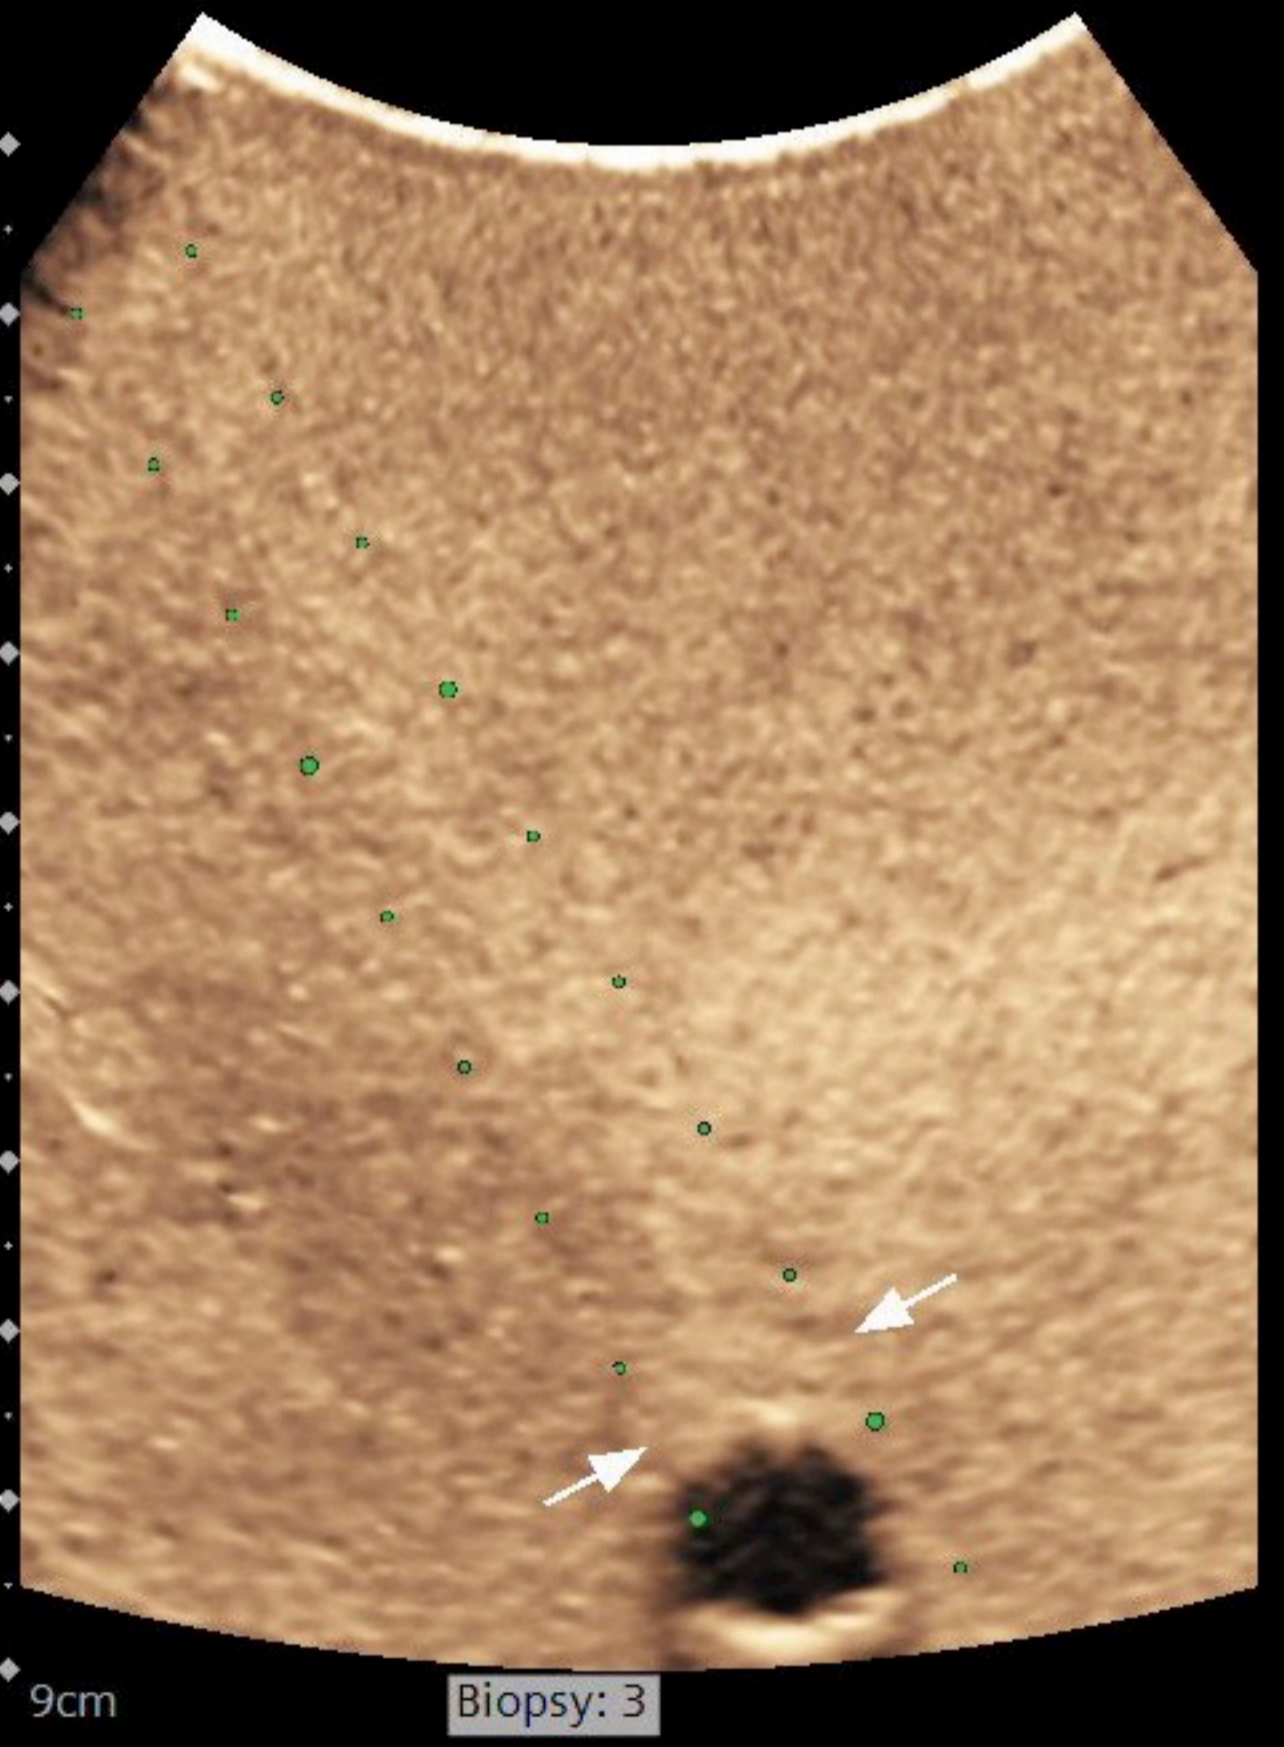

2nd puncture

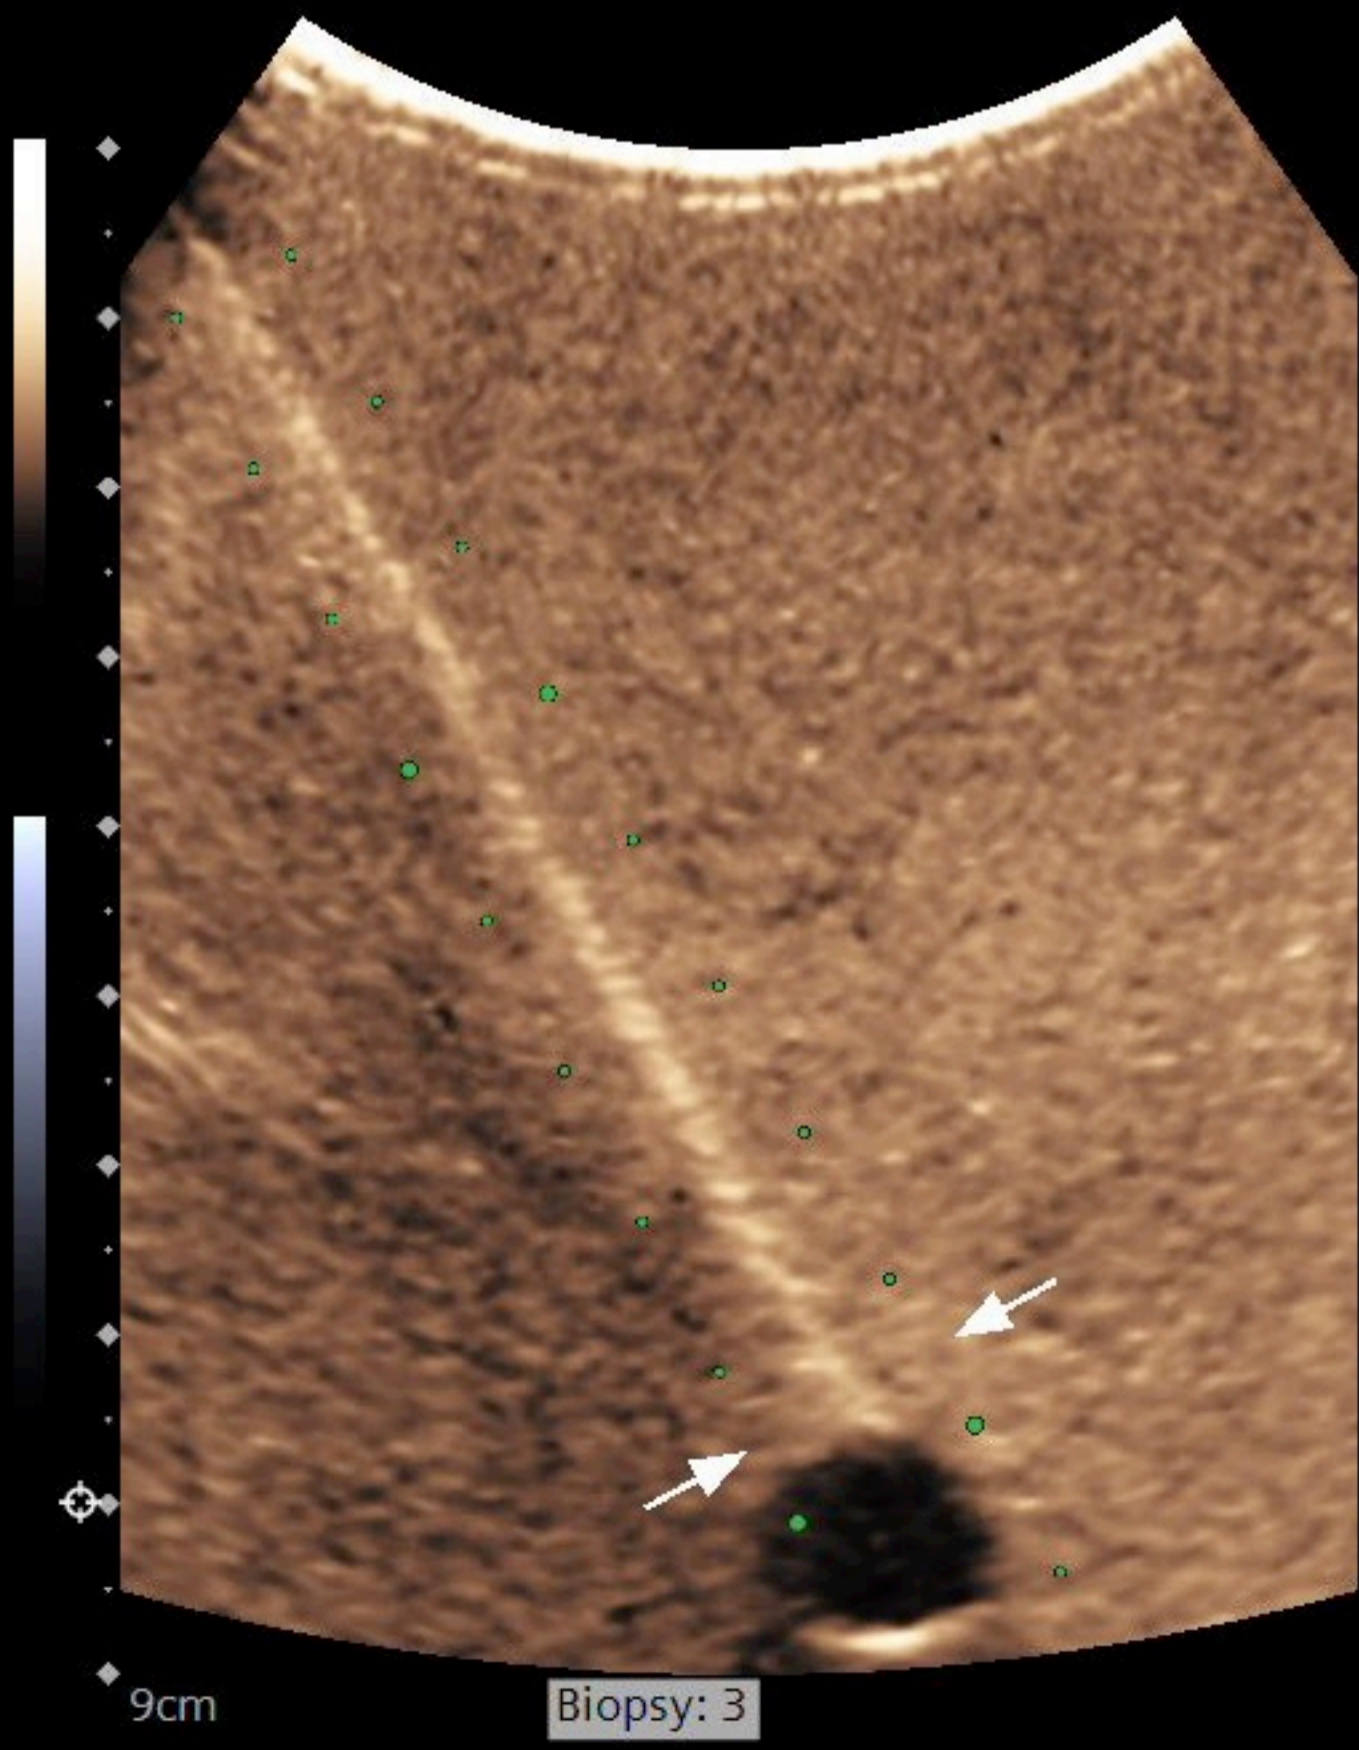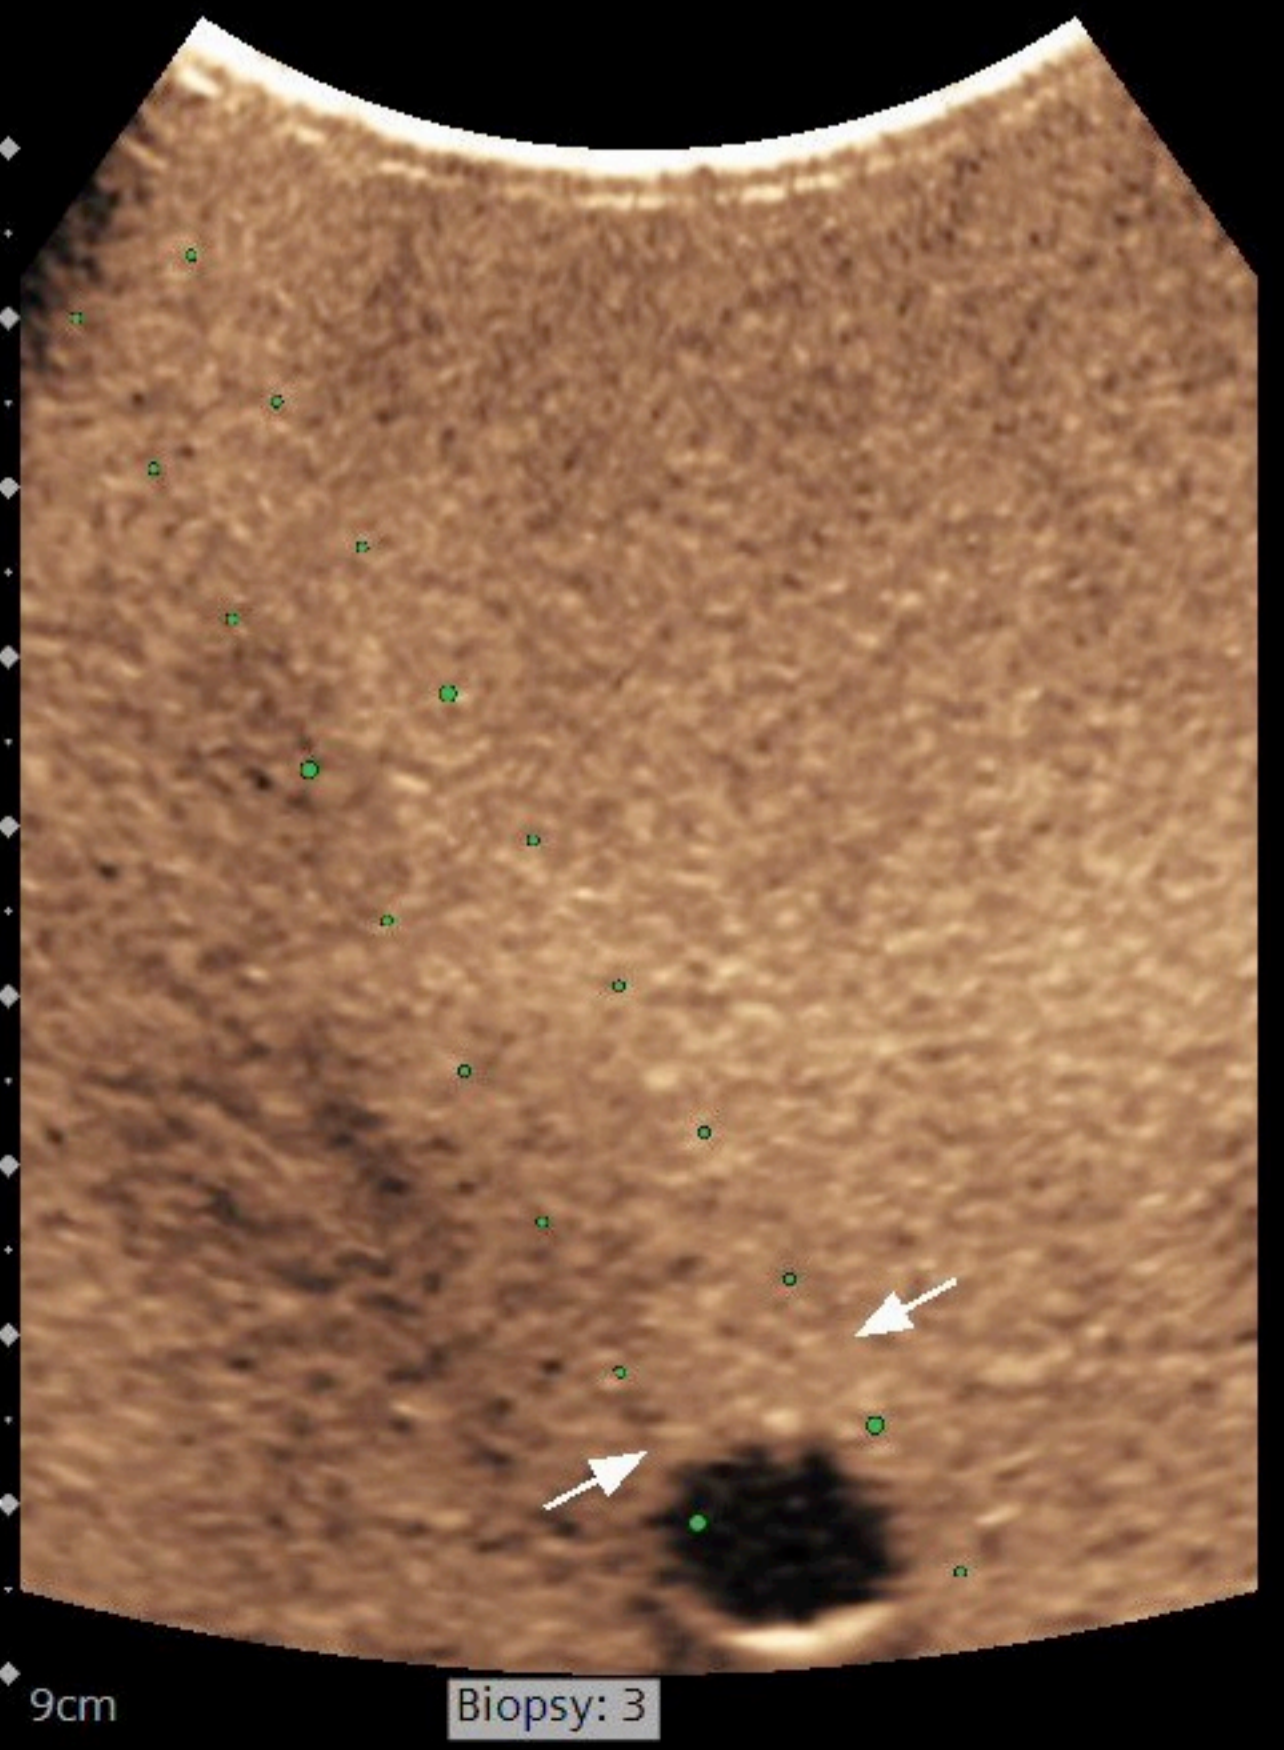

3rd puncture

Ultrasound contrast agent

Control



Introducer needle (set 6/10)

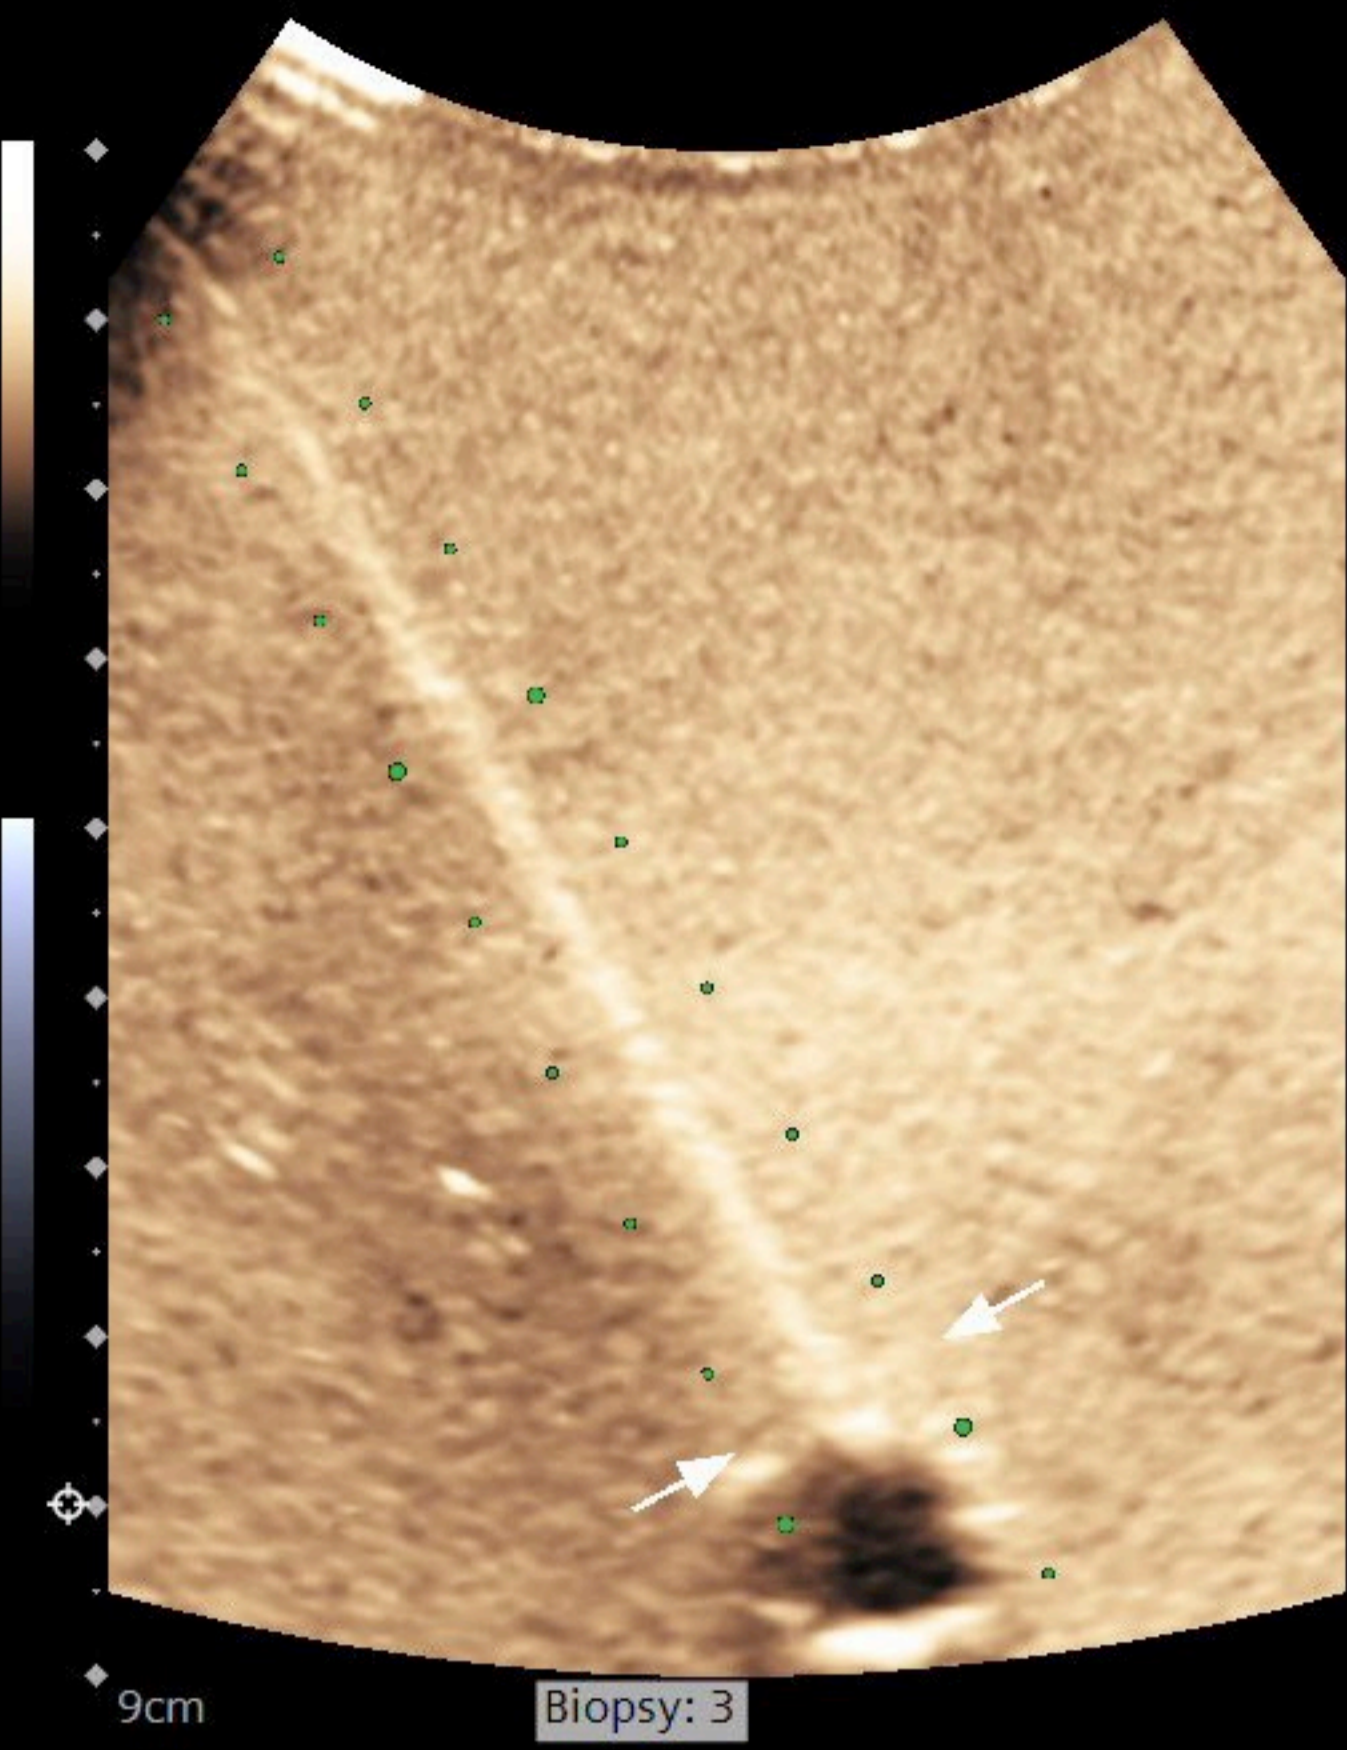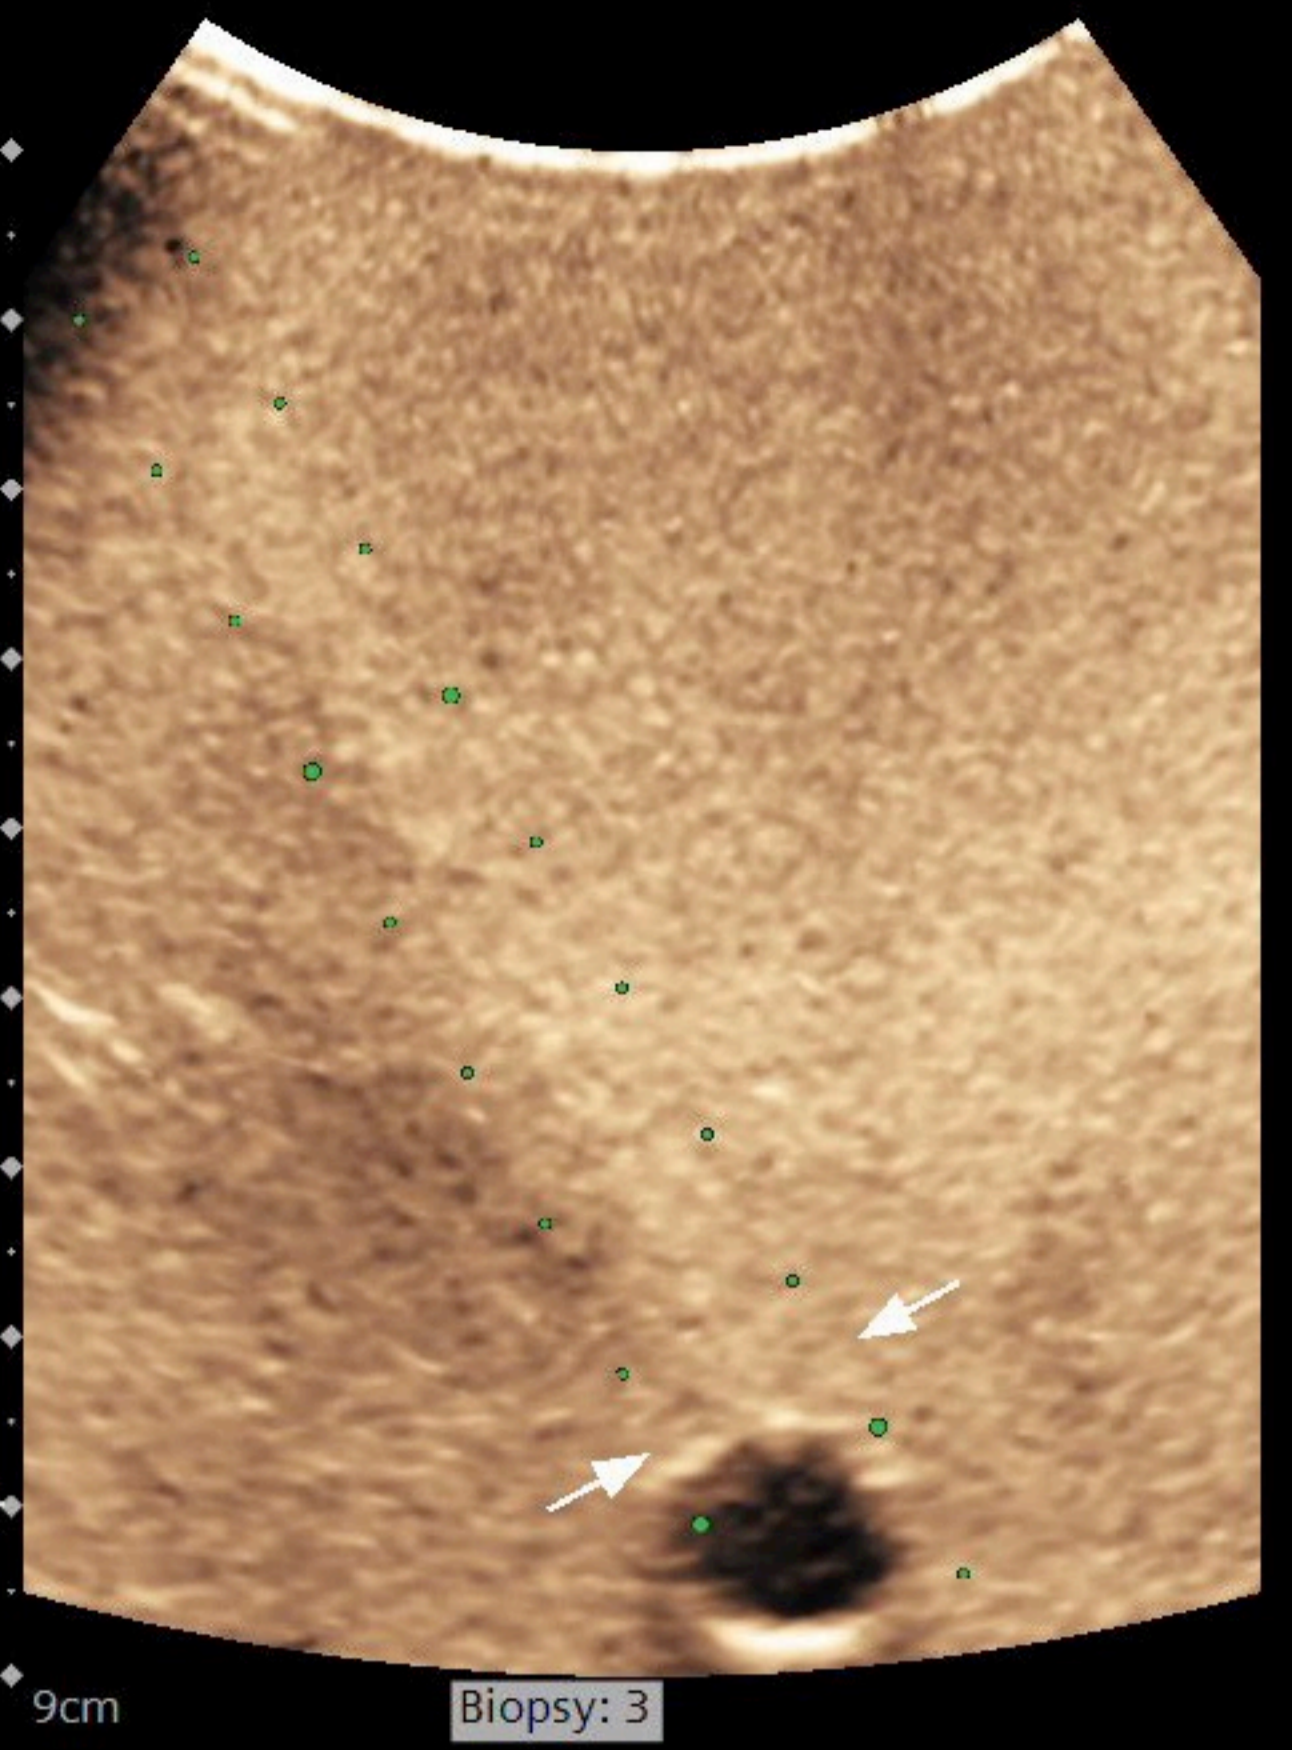

1st puncture

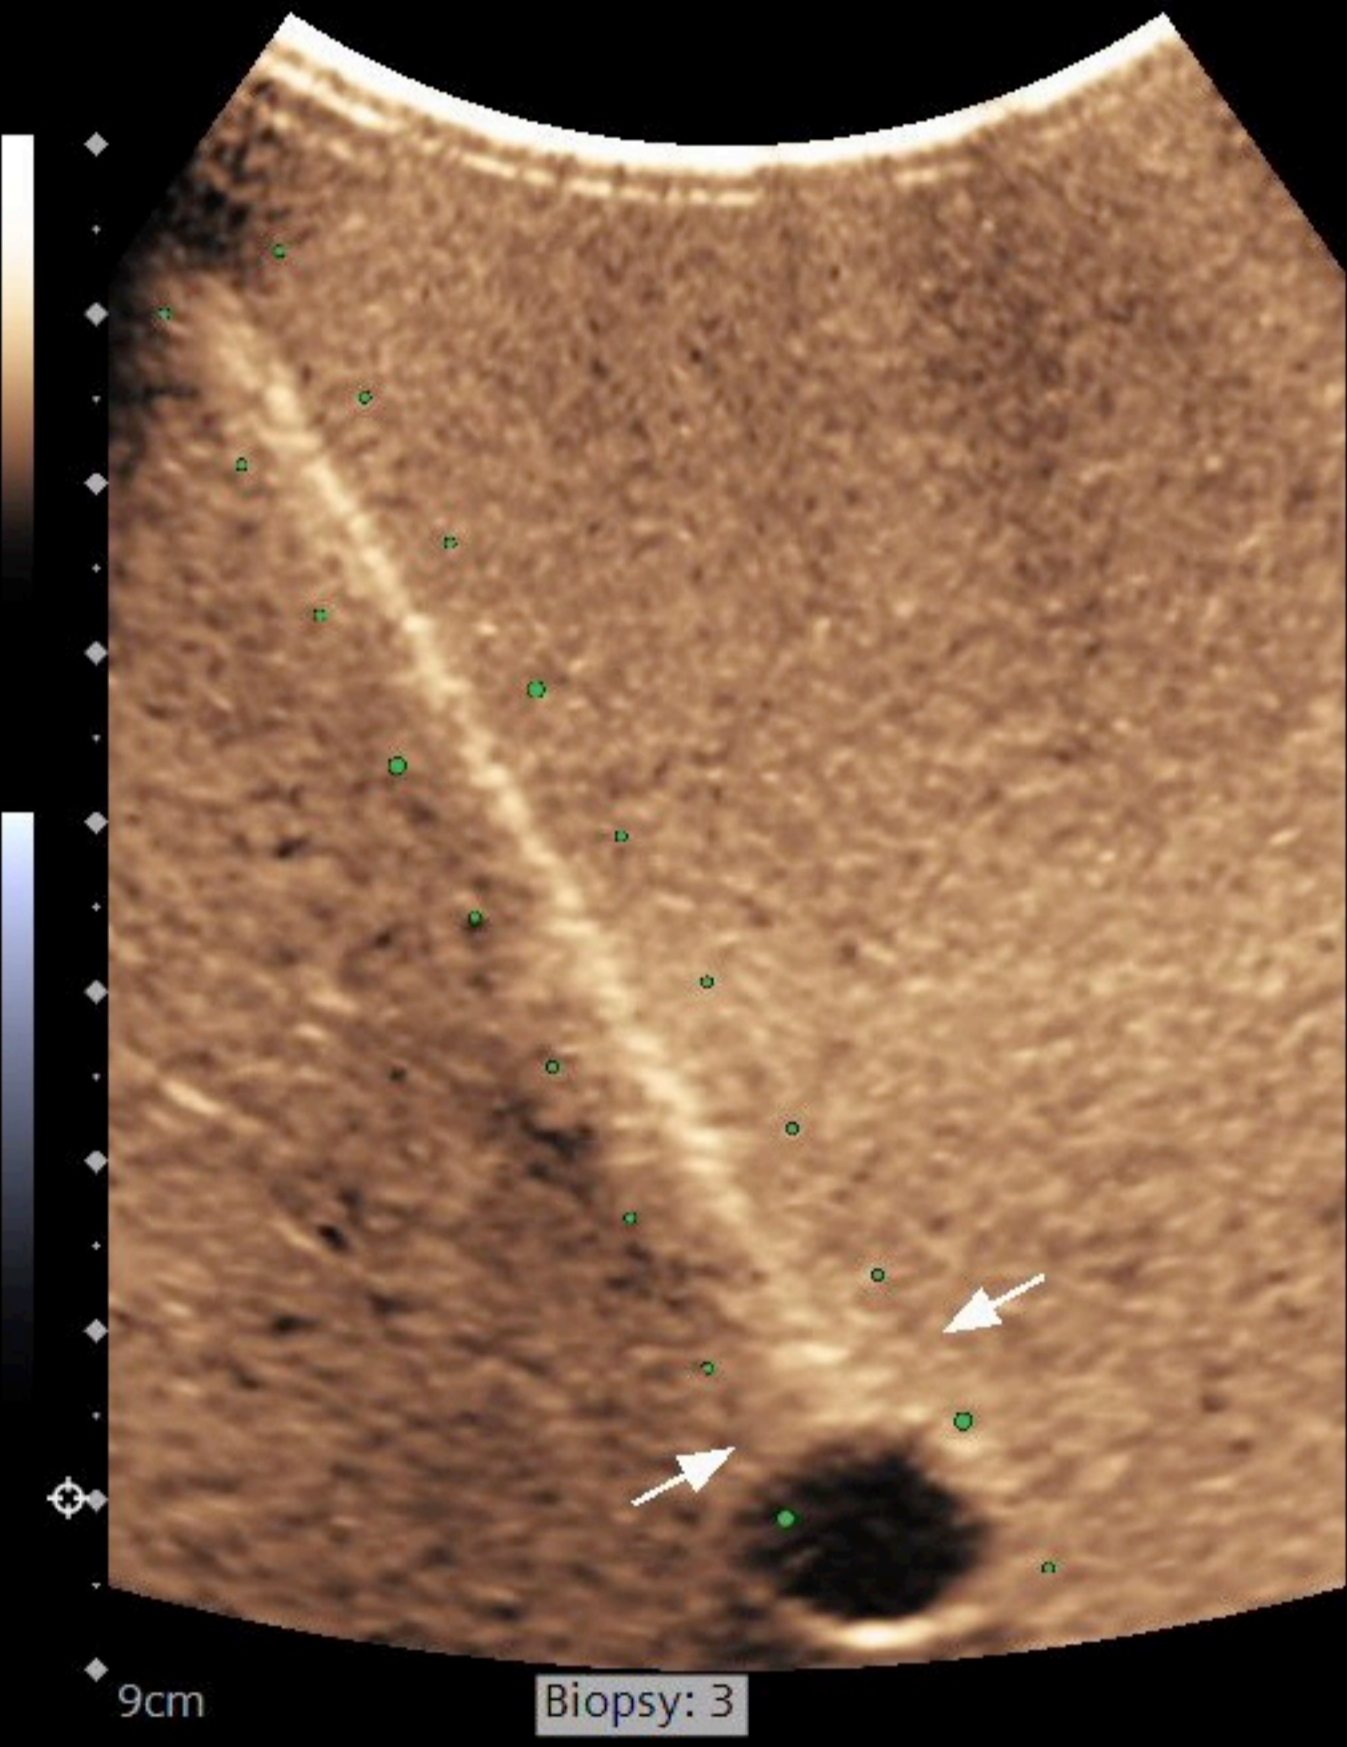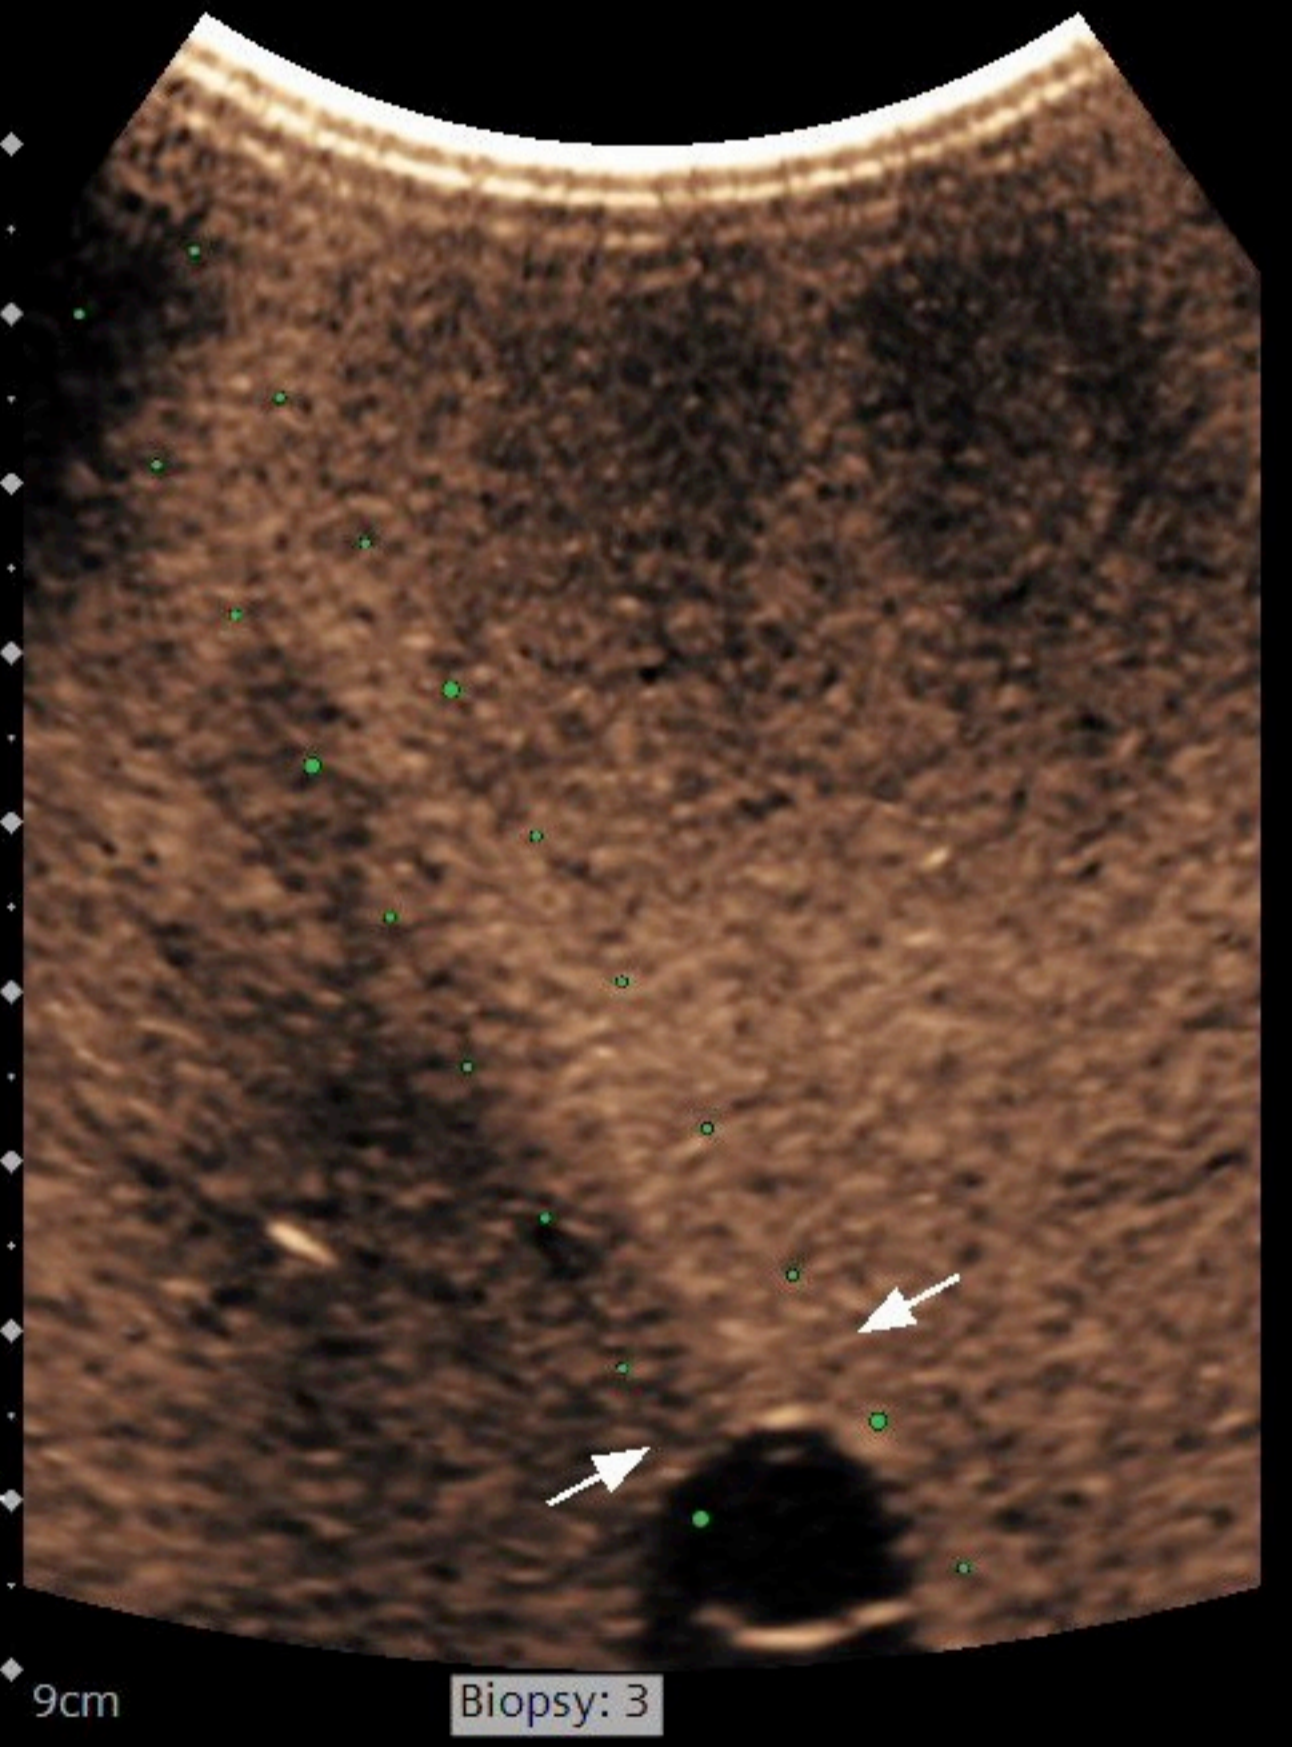

2nd puncture

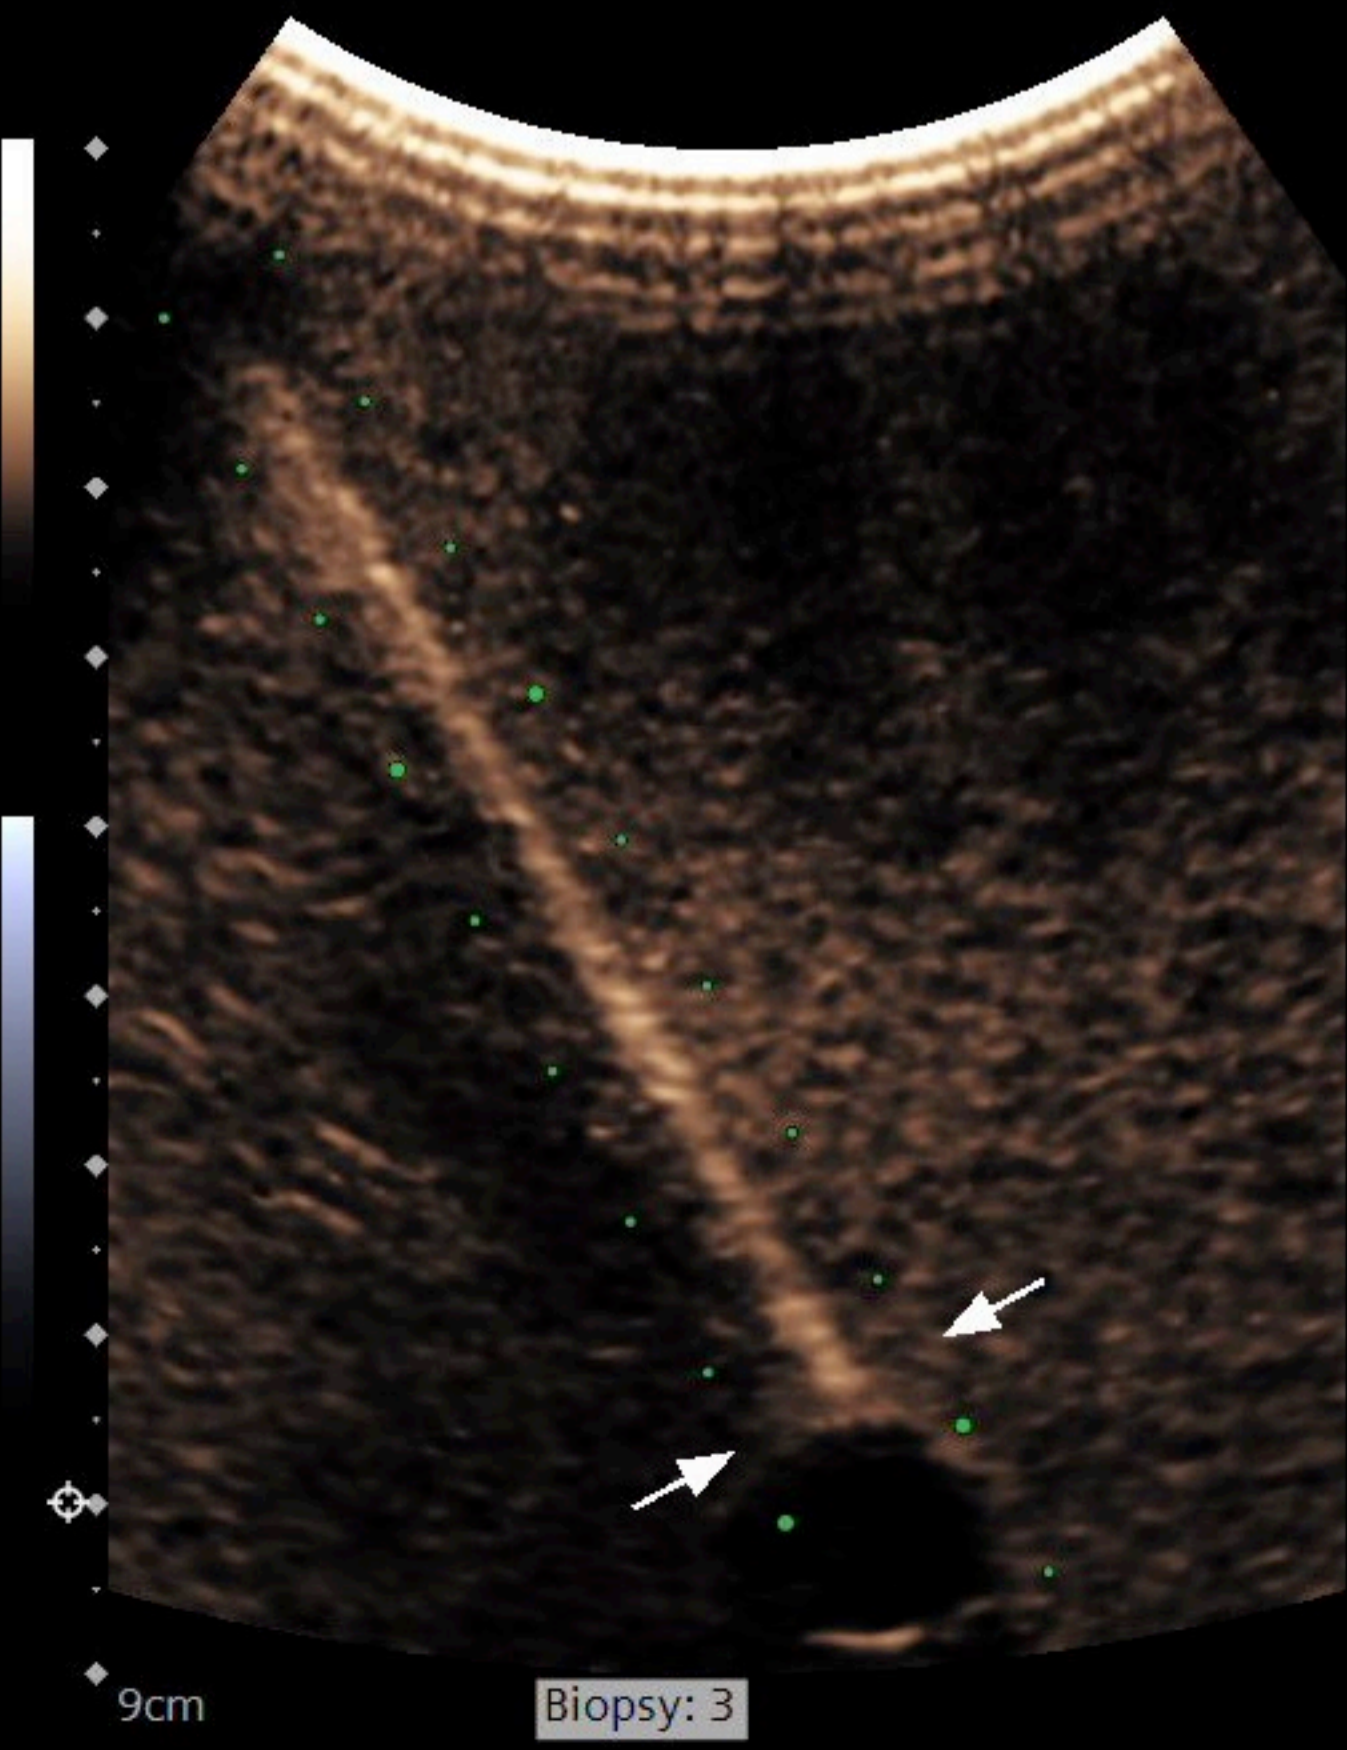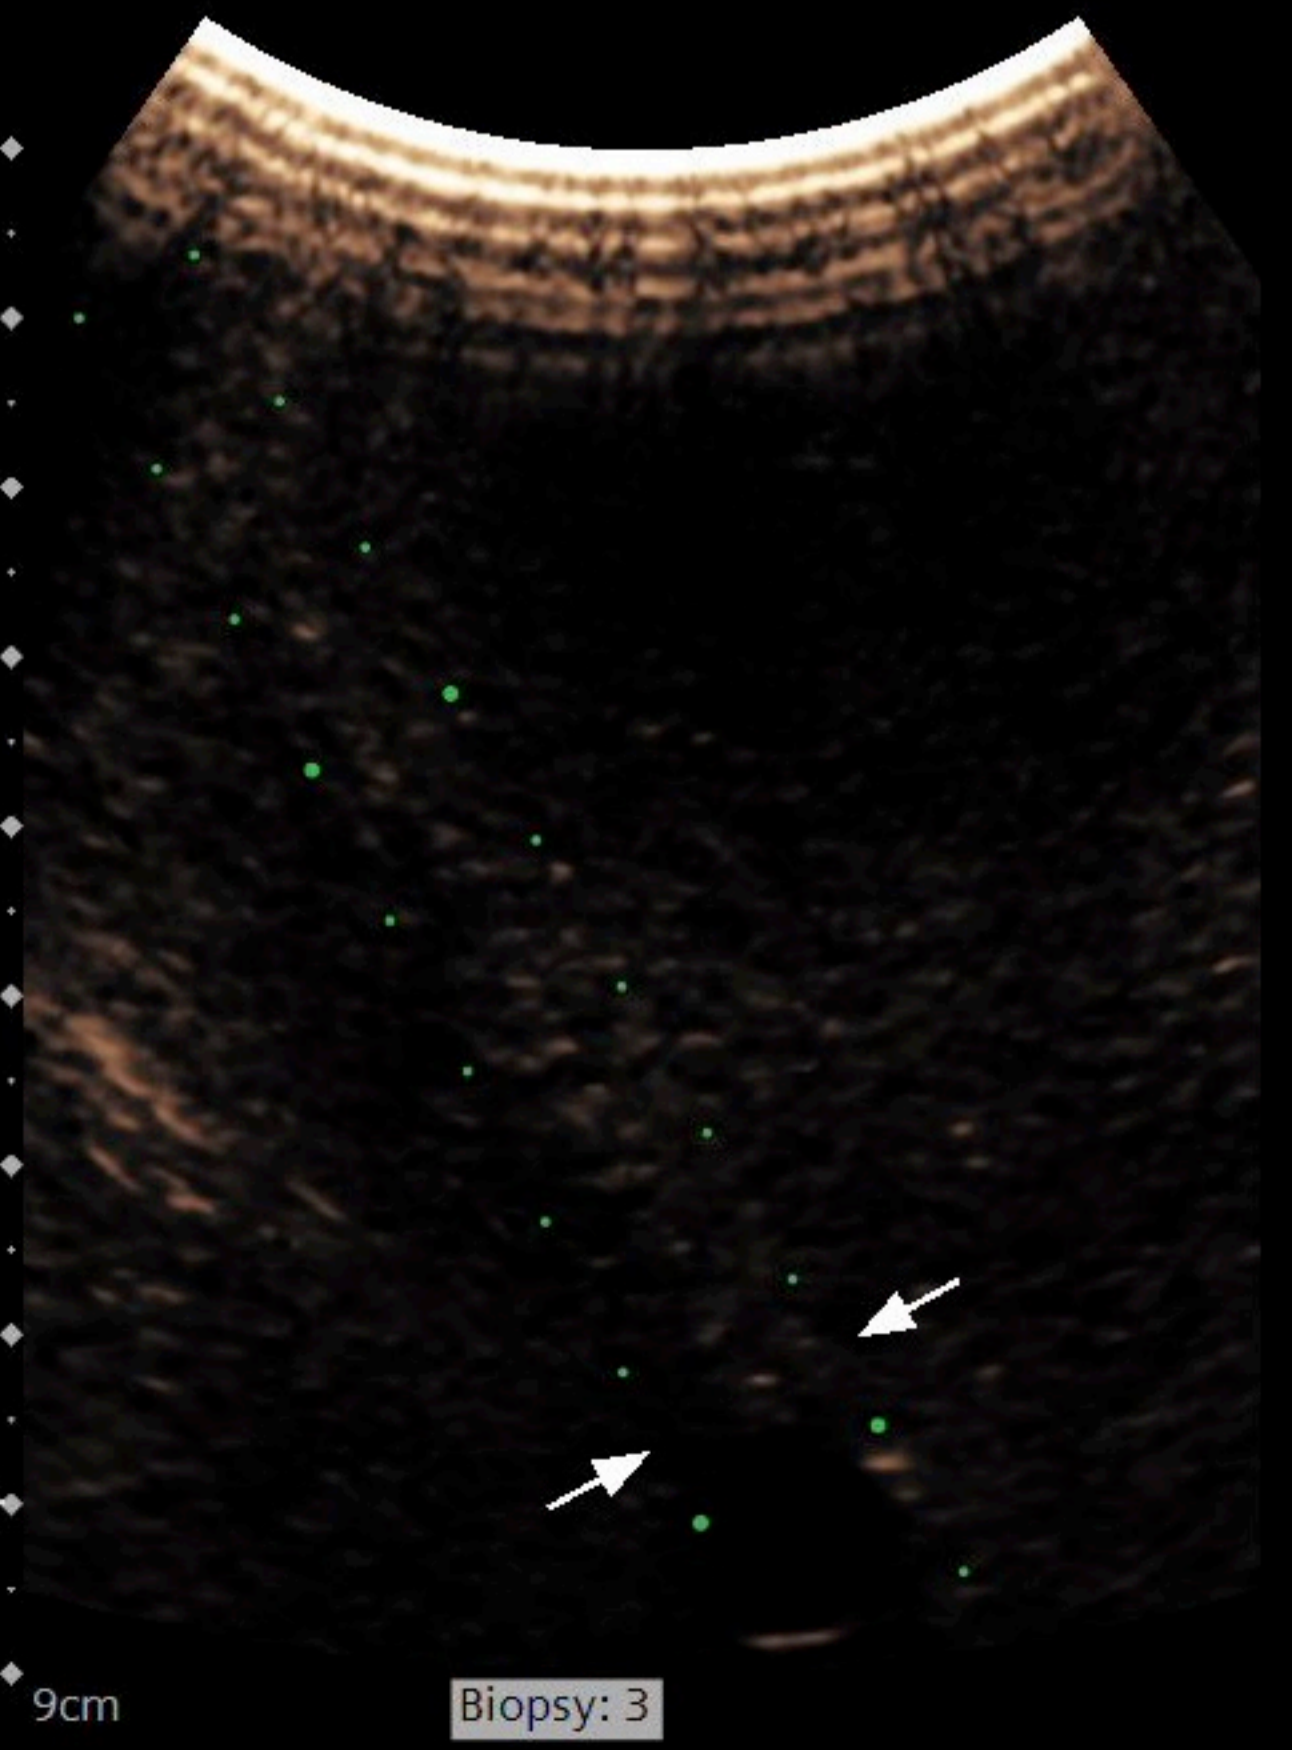

3rd puncture

Ultrasound contrast agent

Control



Introducer needle (set 7/10)

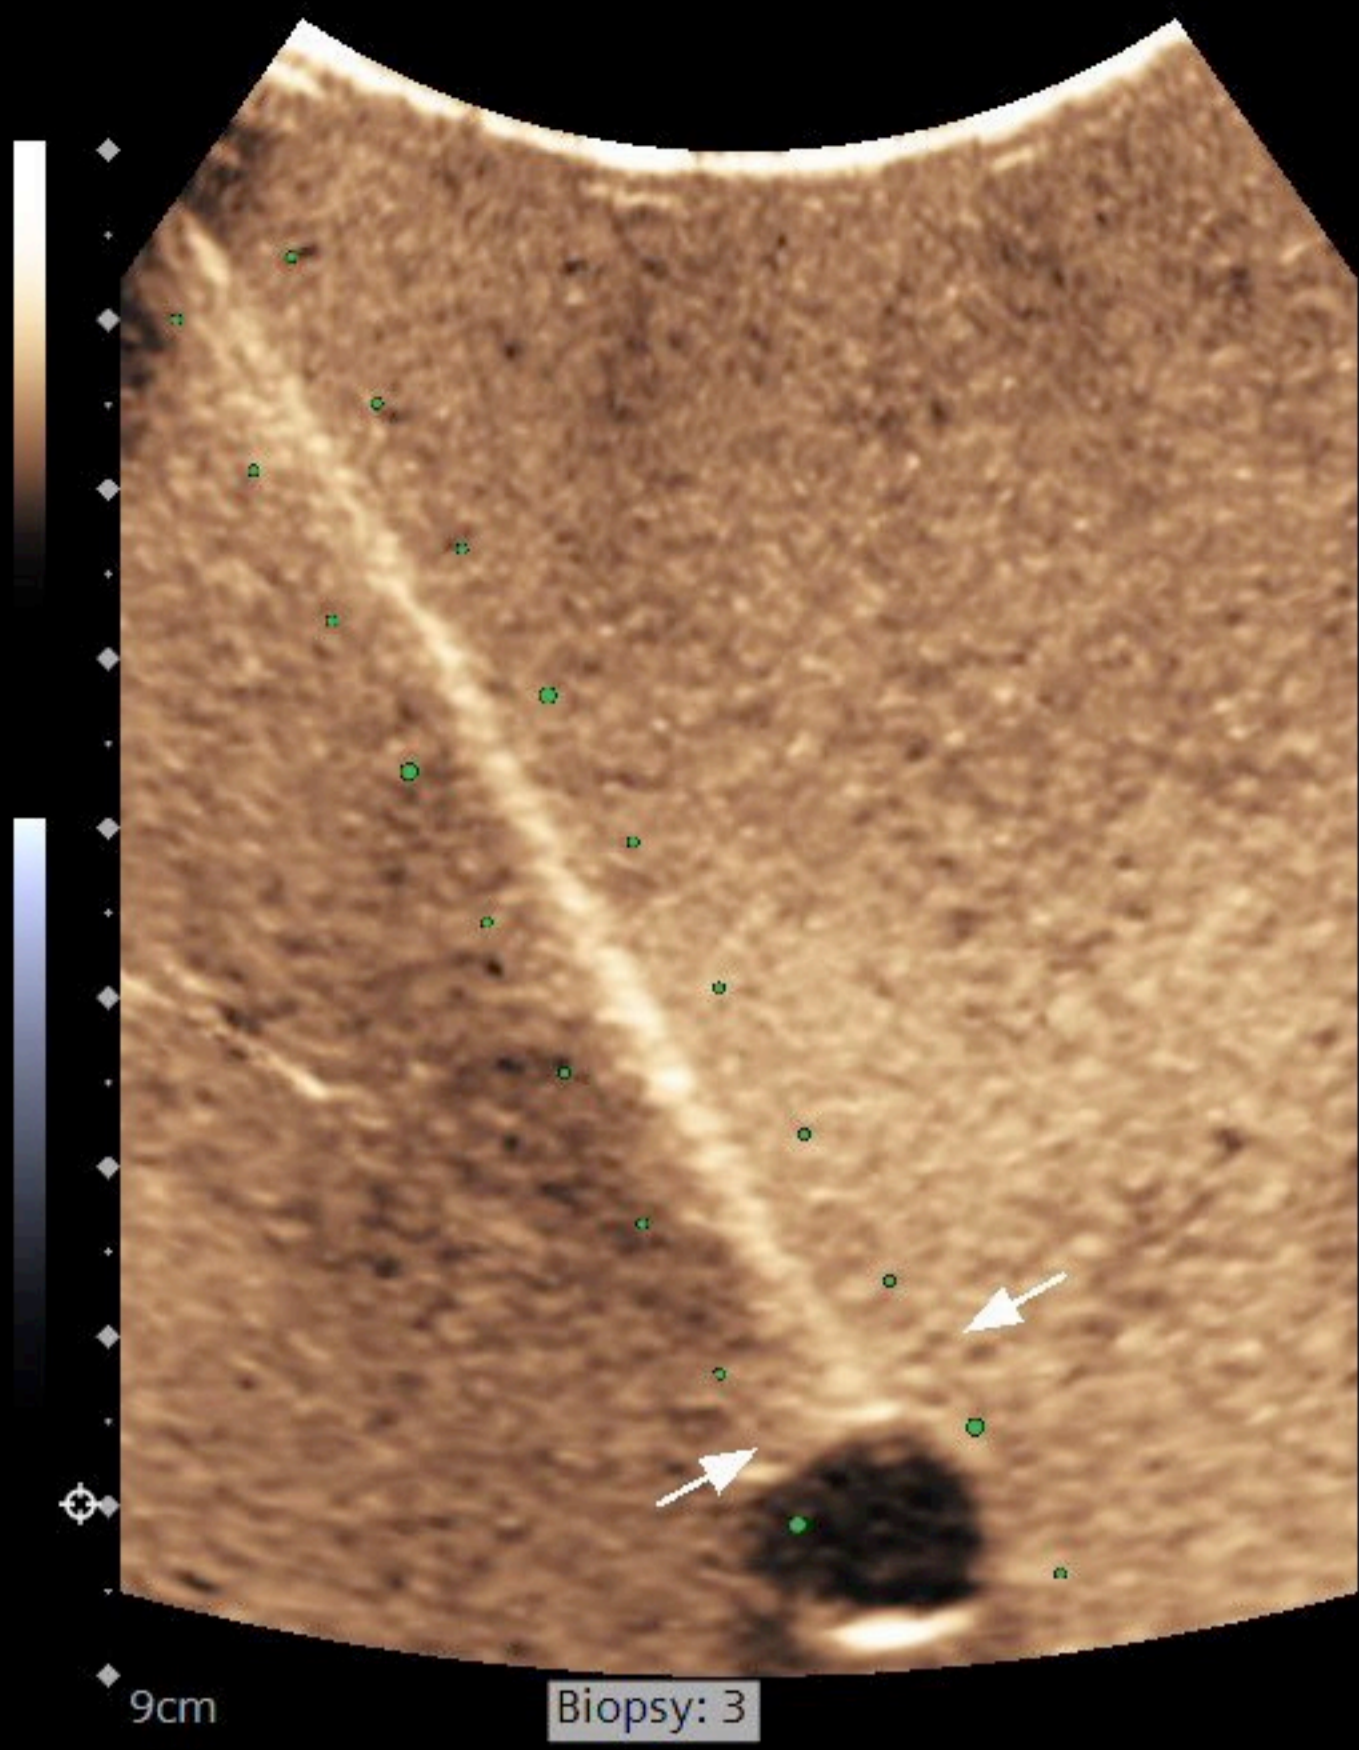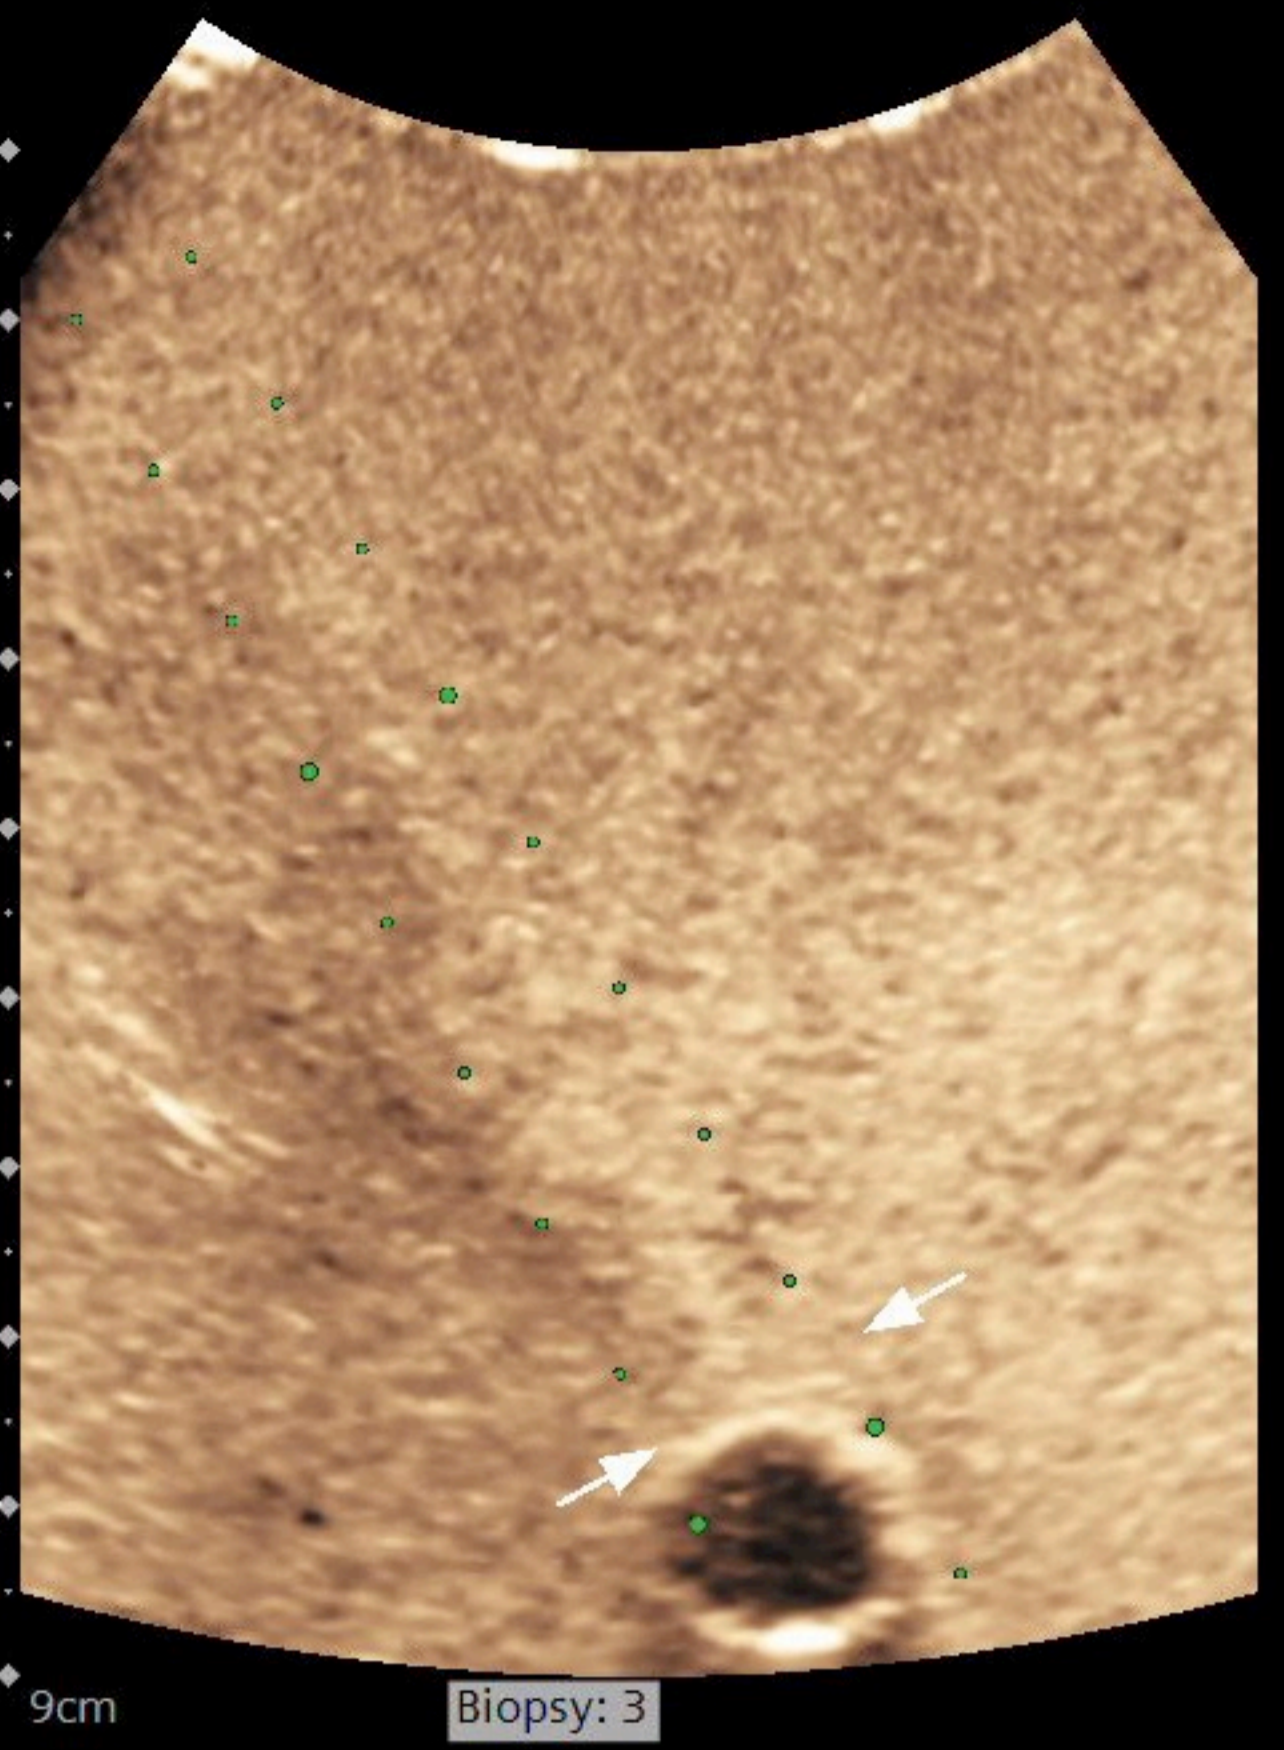

1st puncture

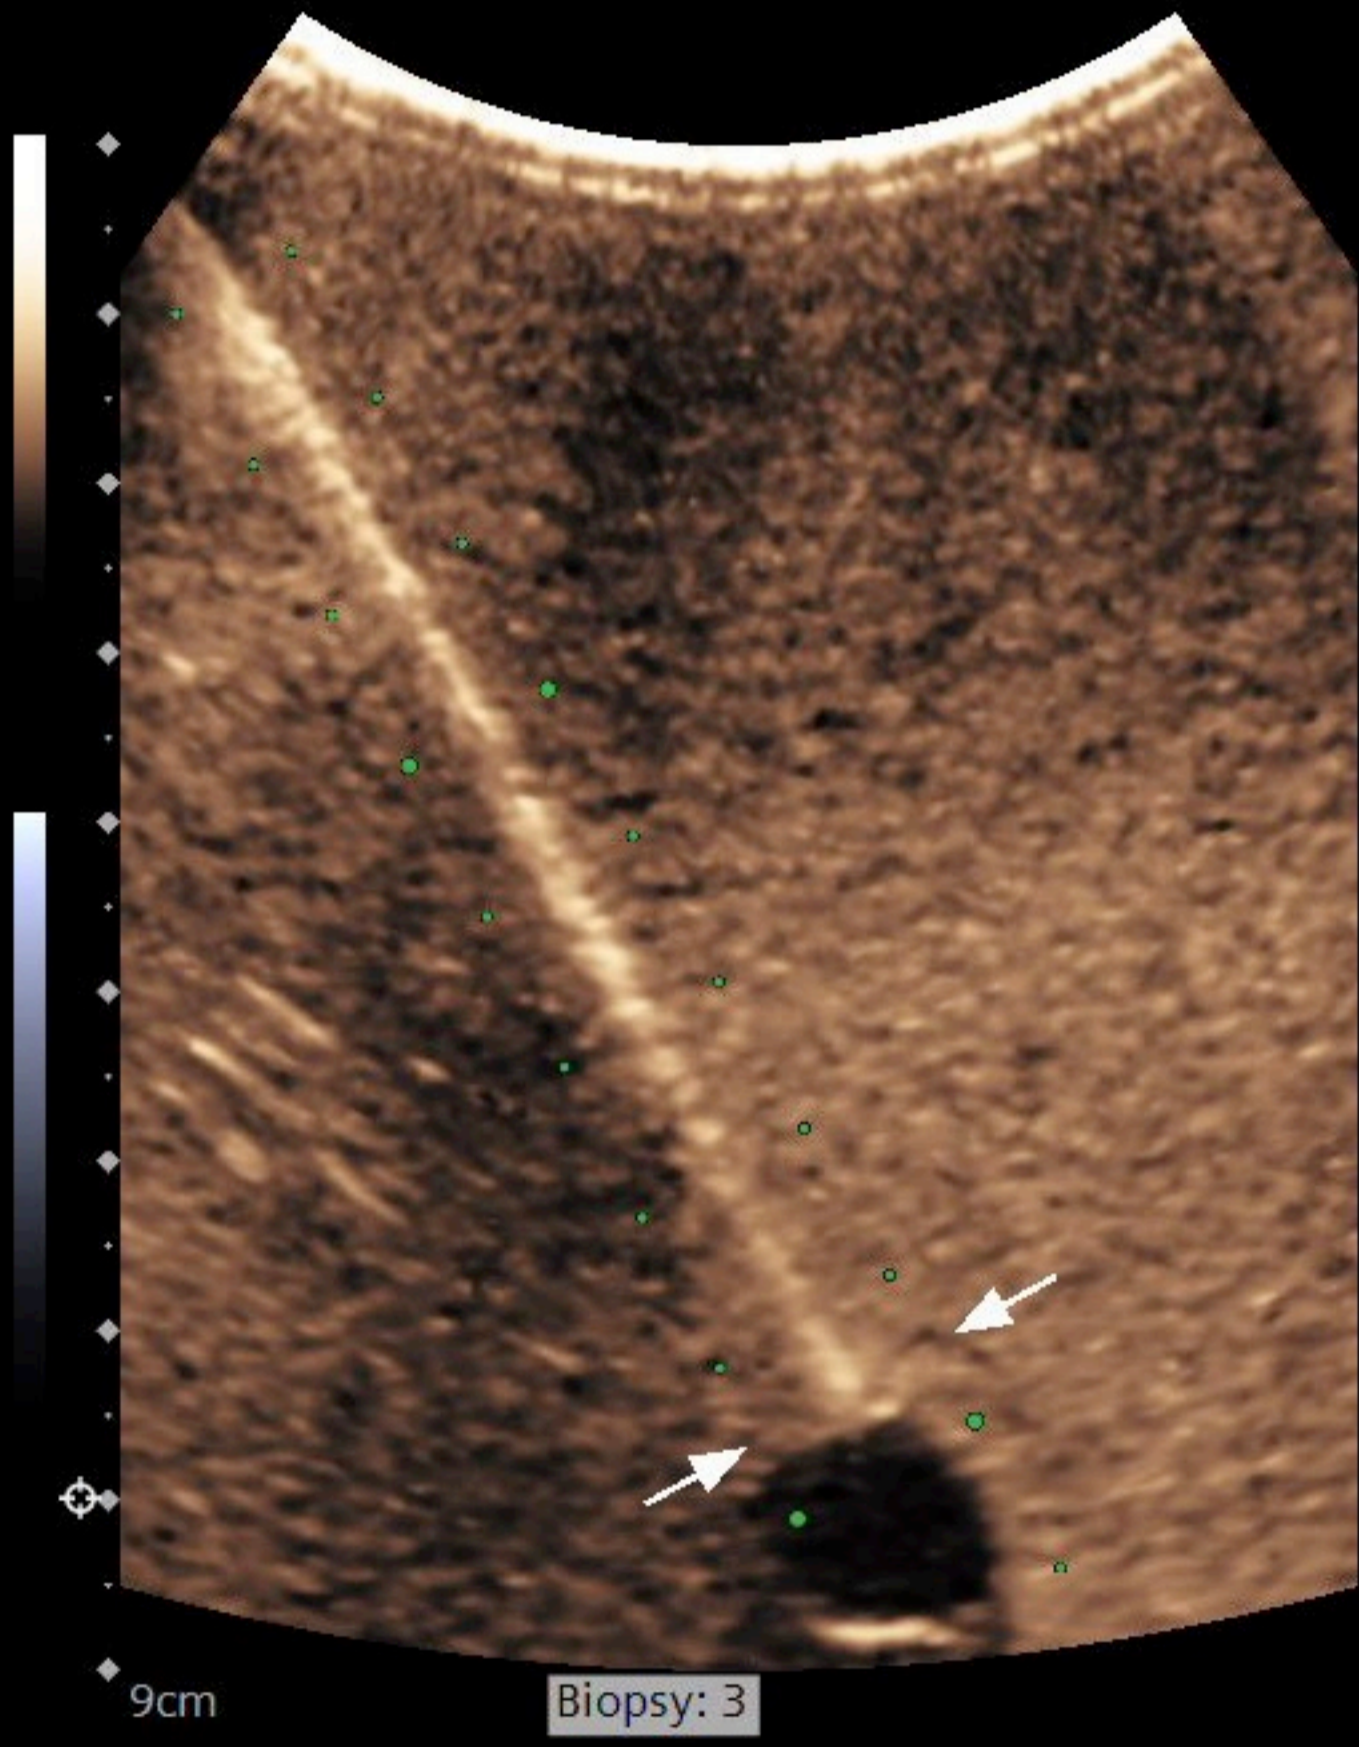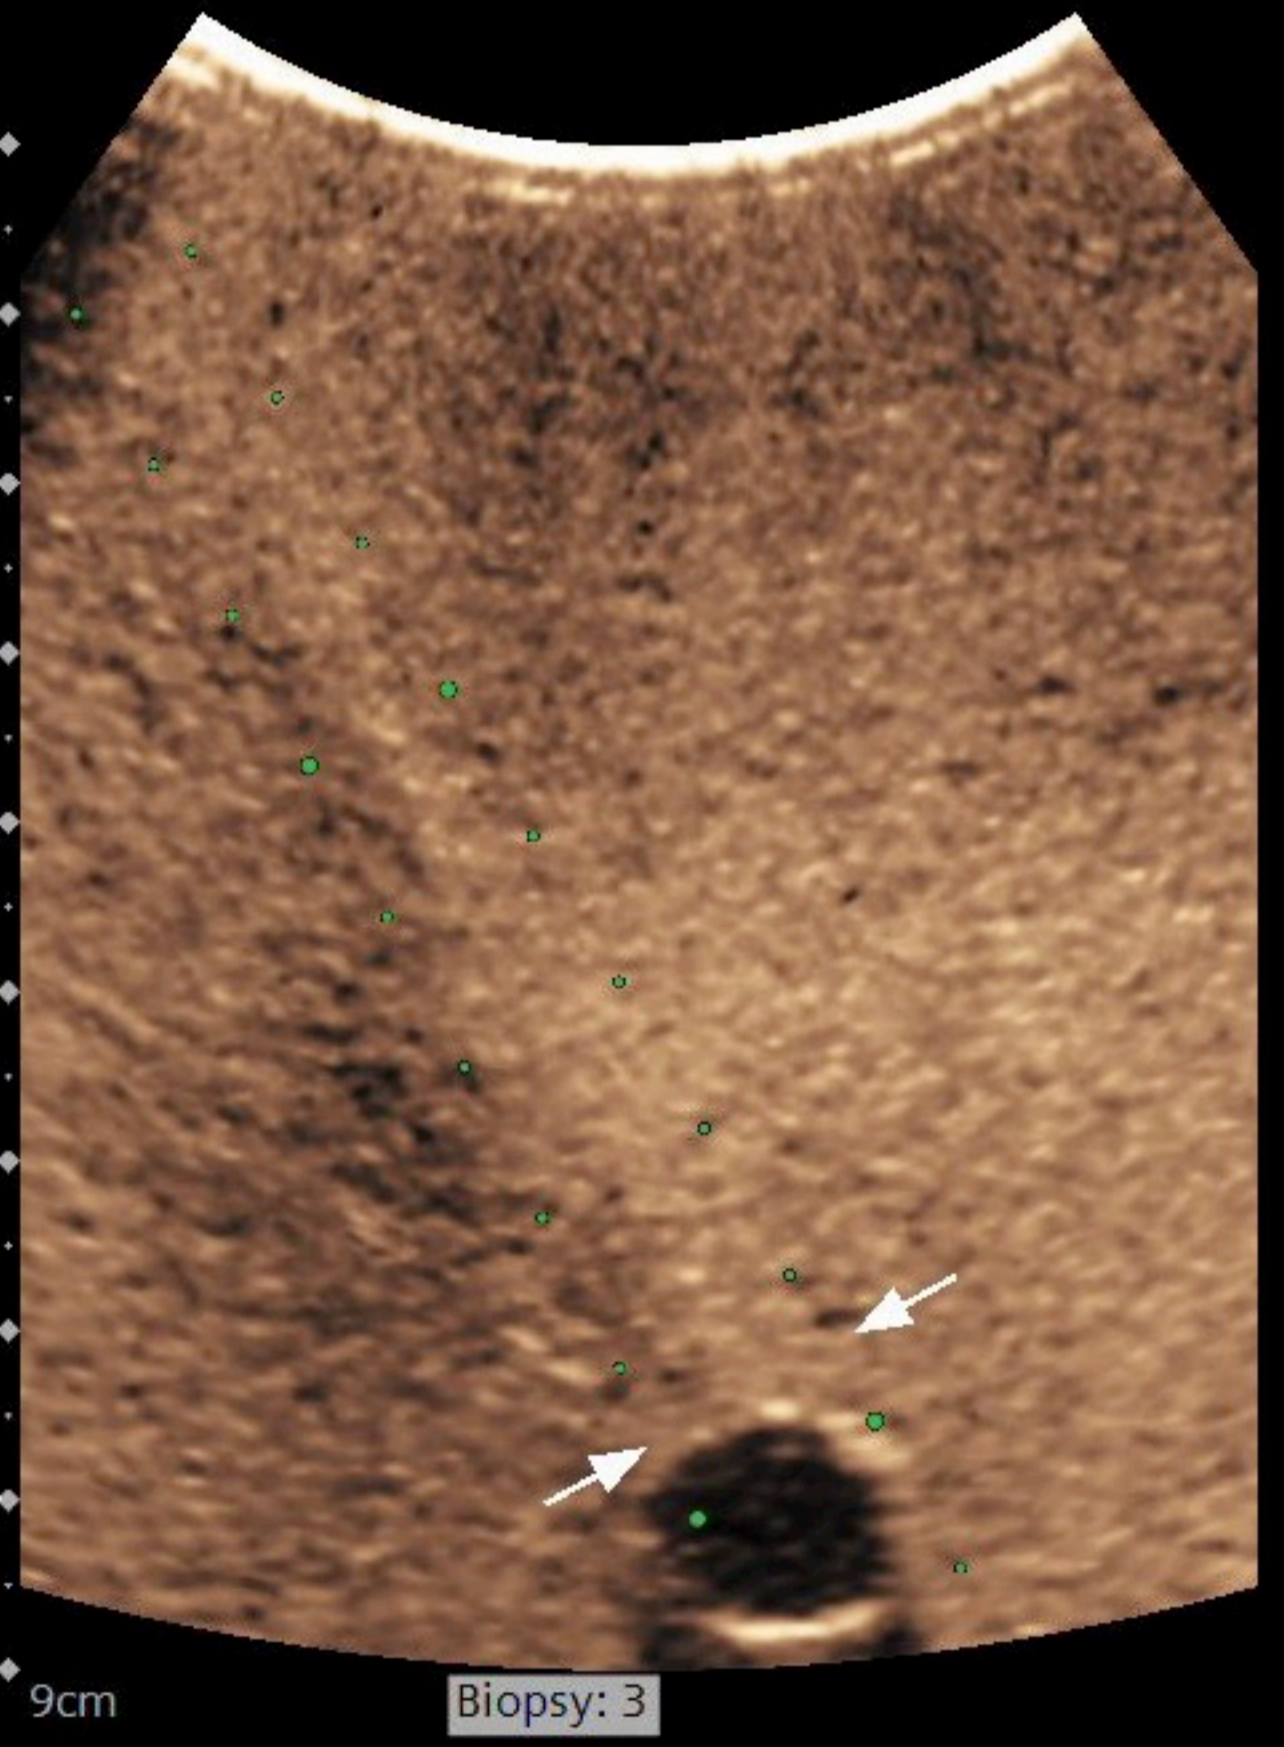

2nd puncture

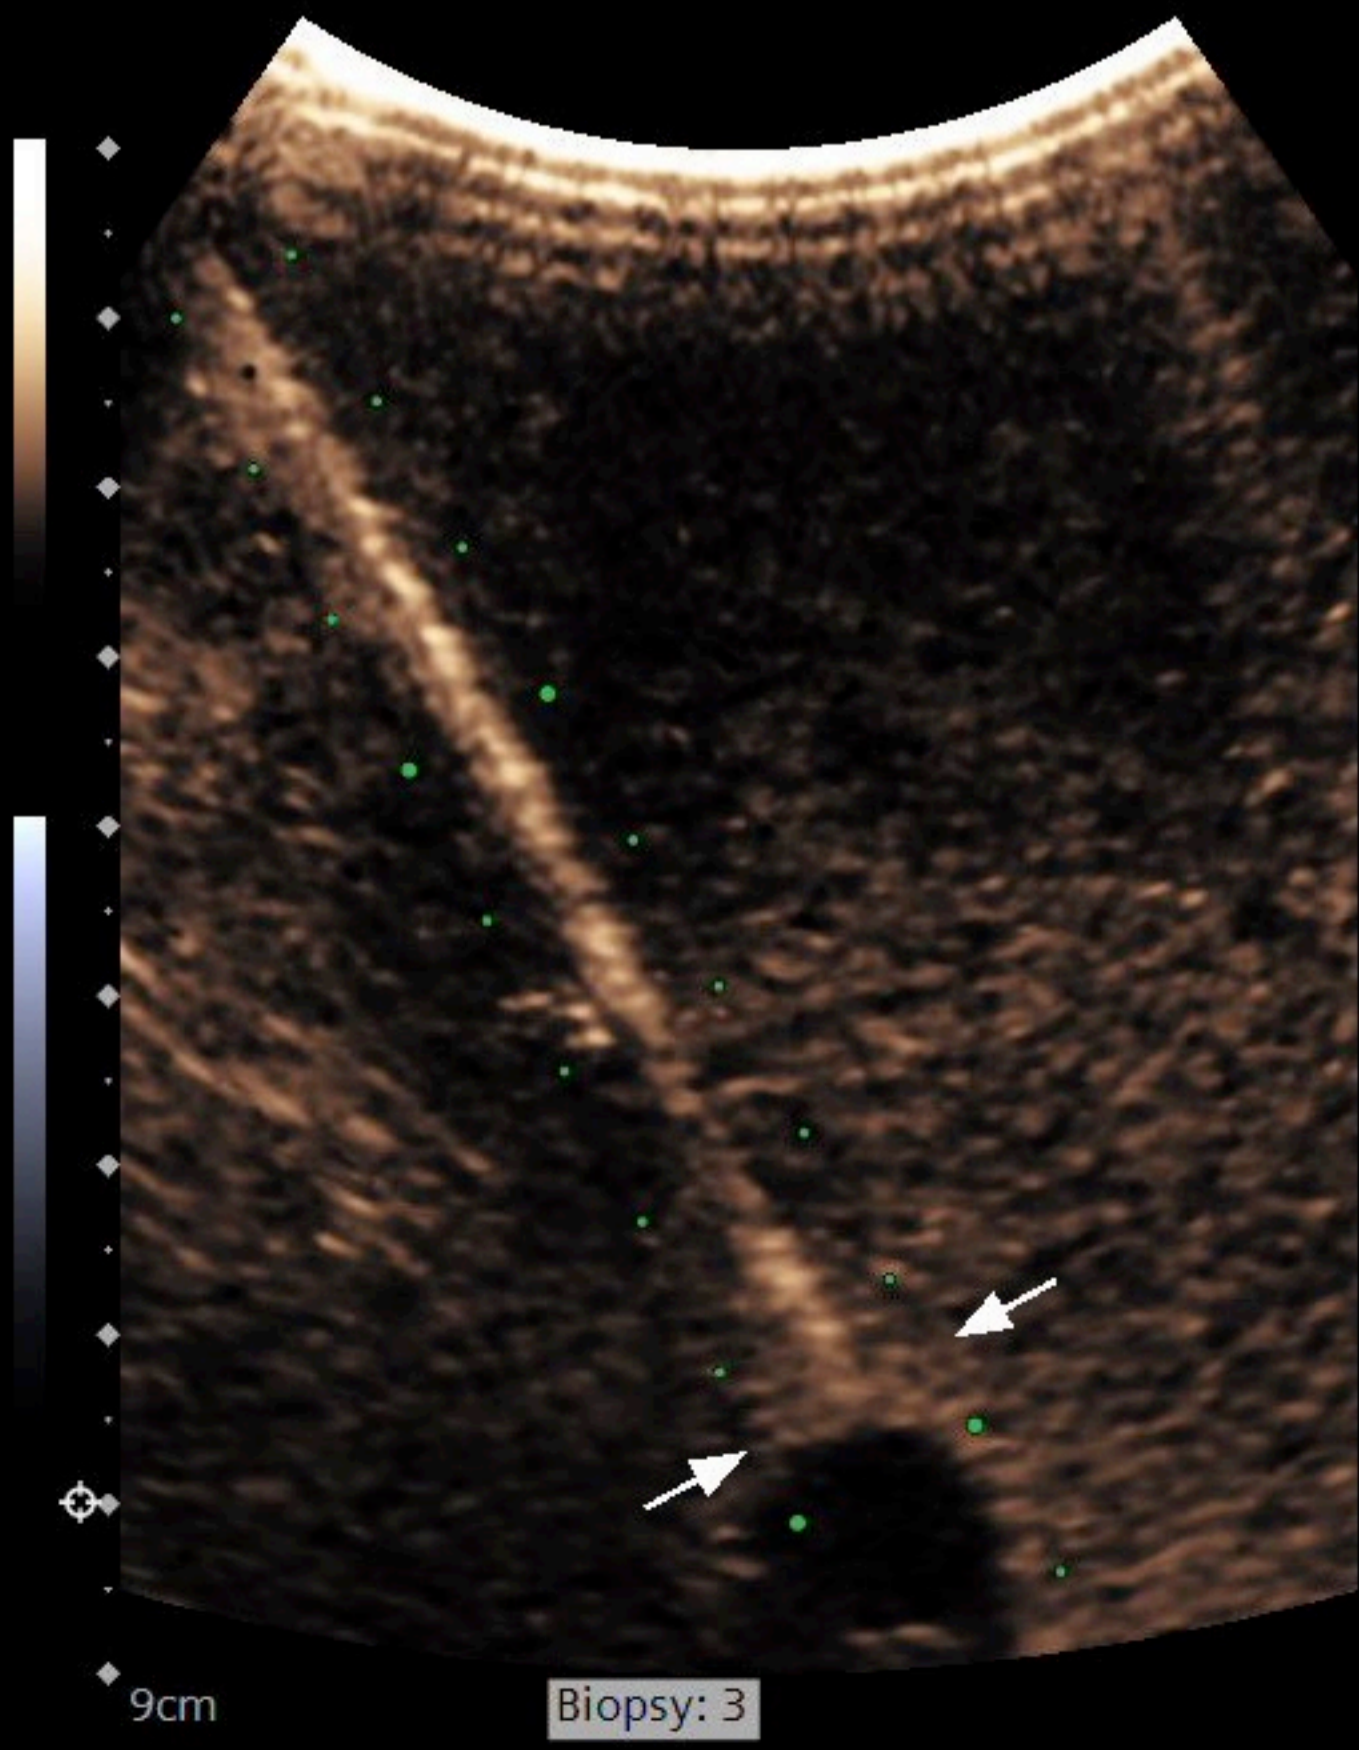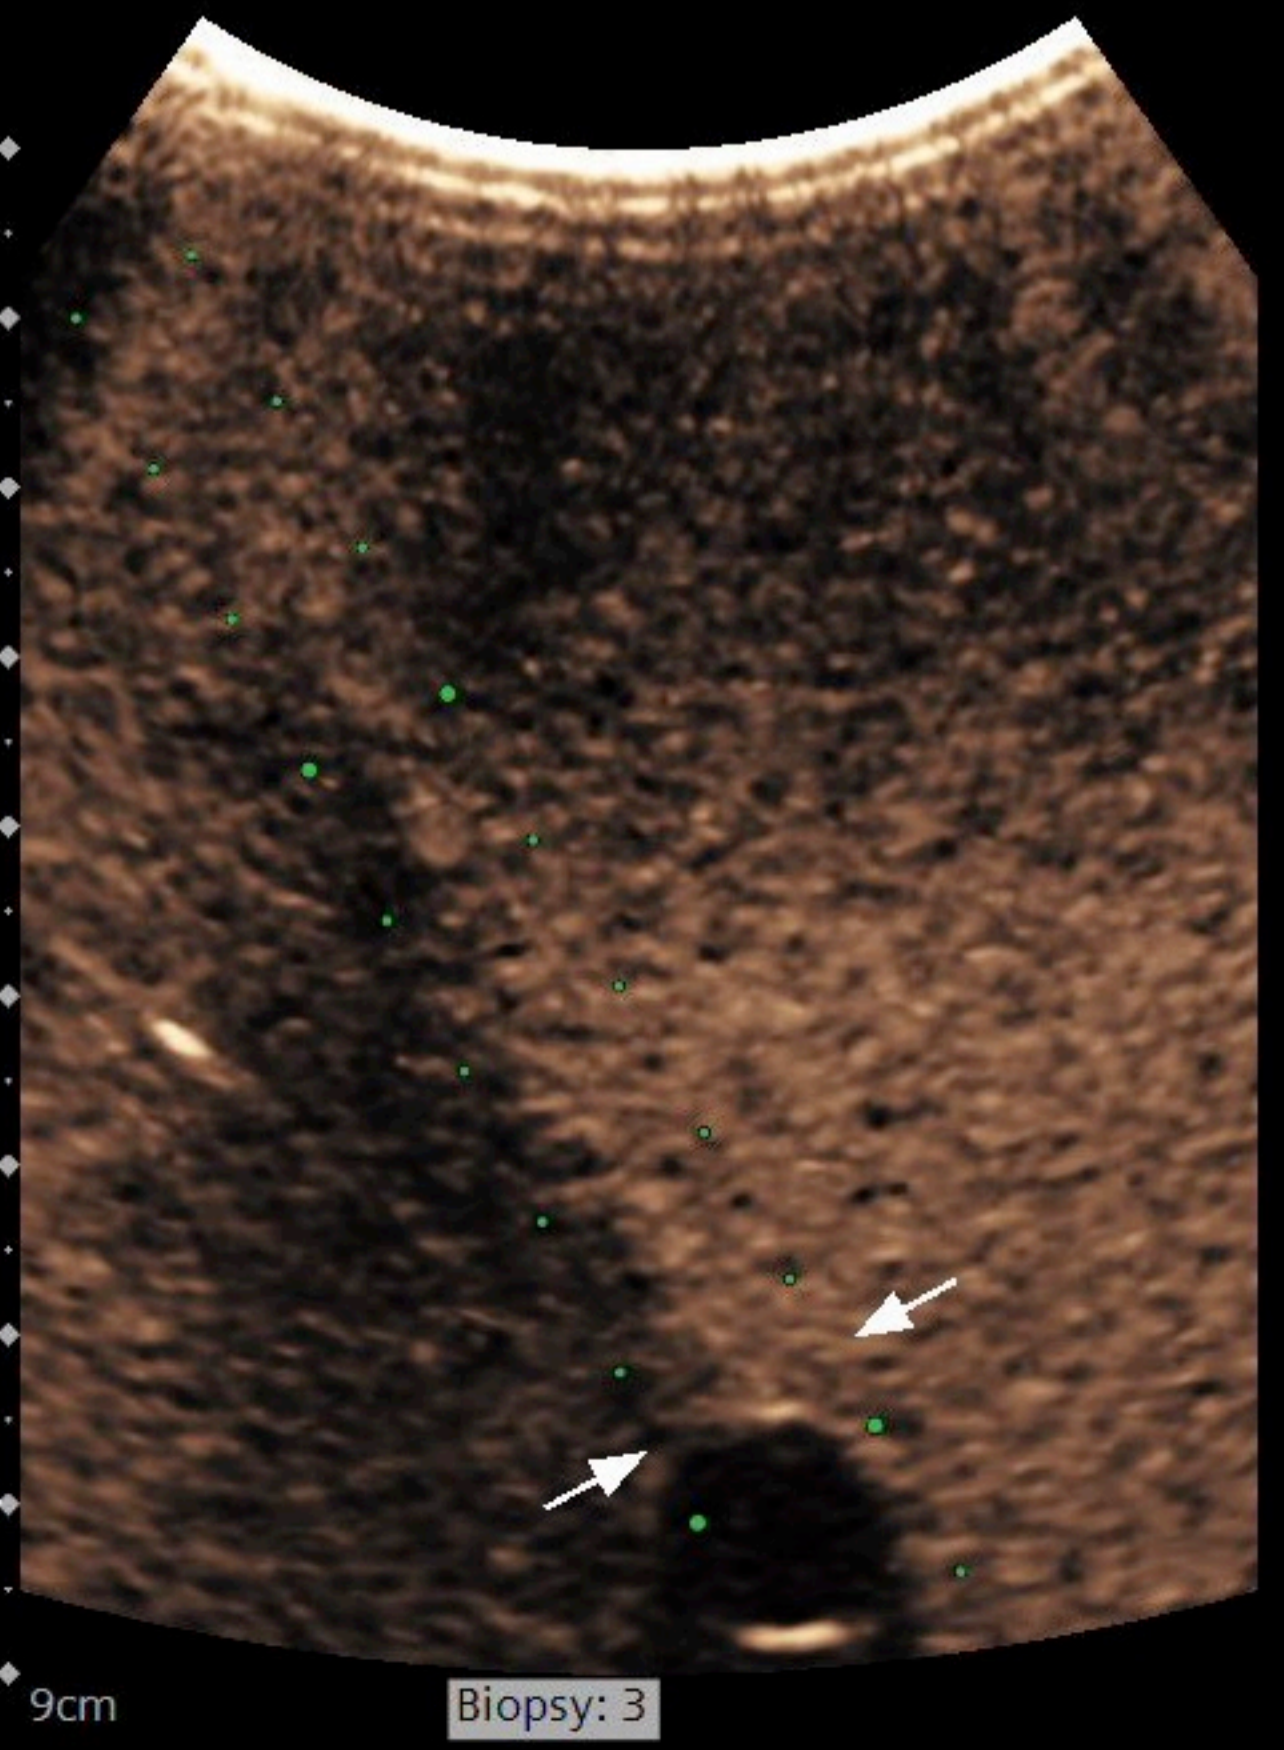

3rd puncture

Ultrasound contrast agent

Control



Introducer needle (set 8/10)

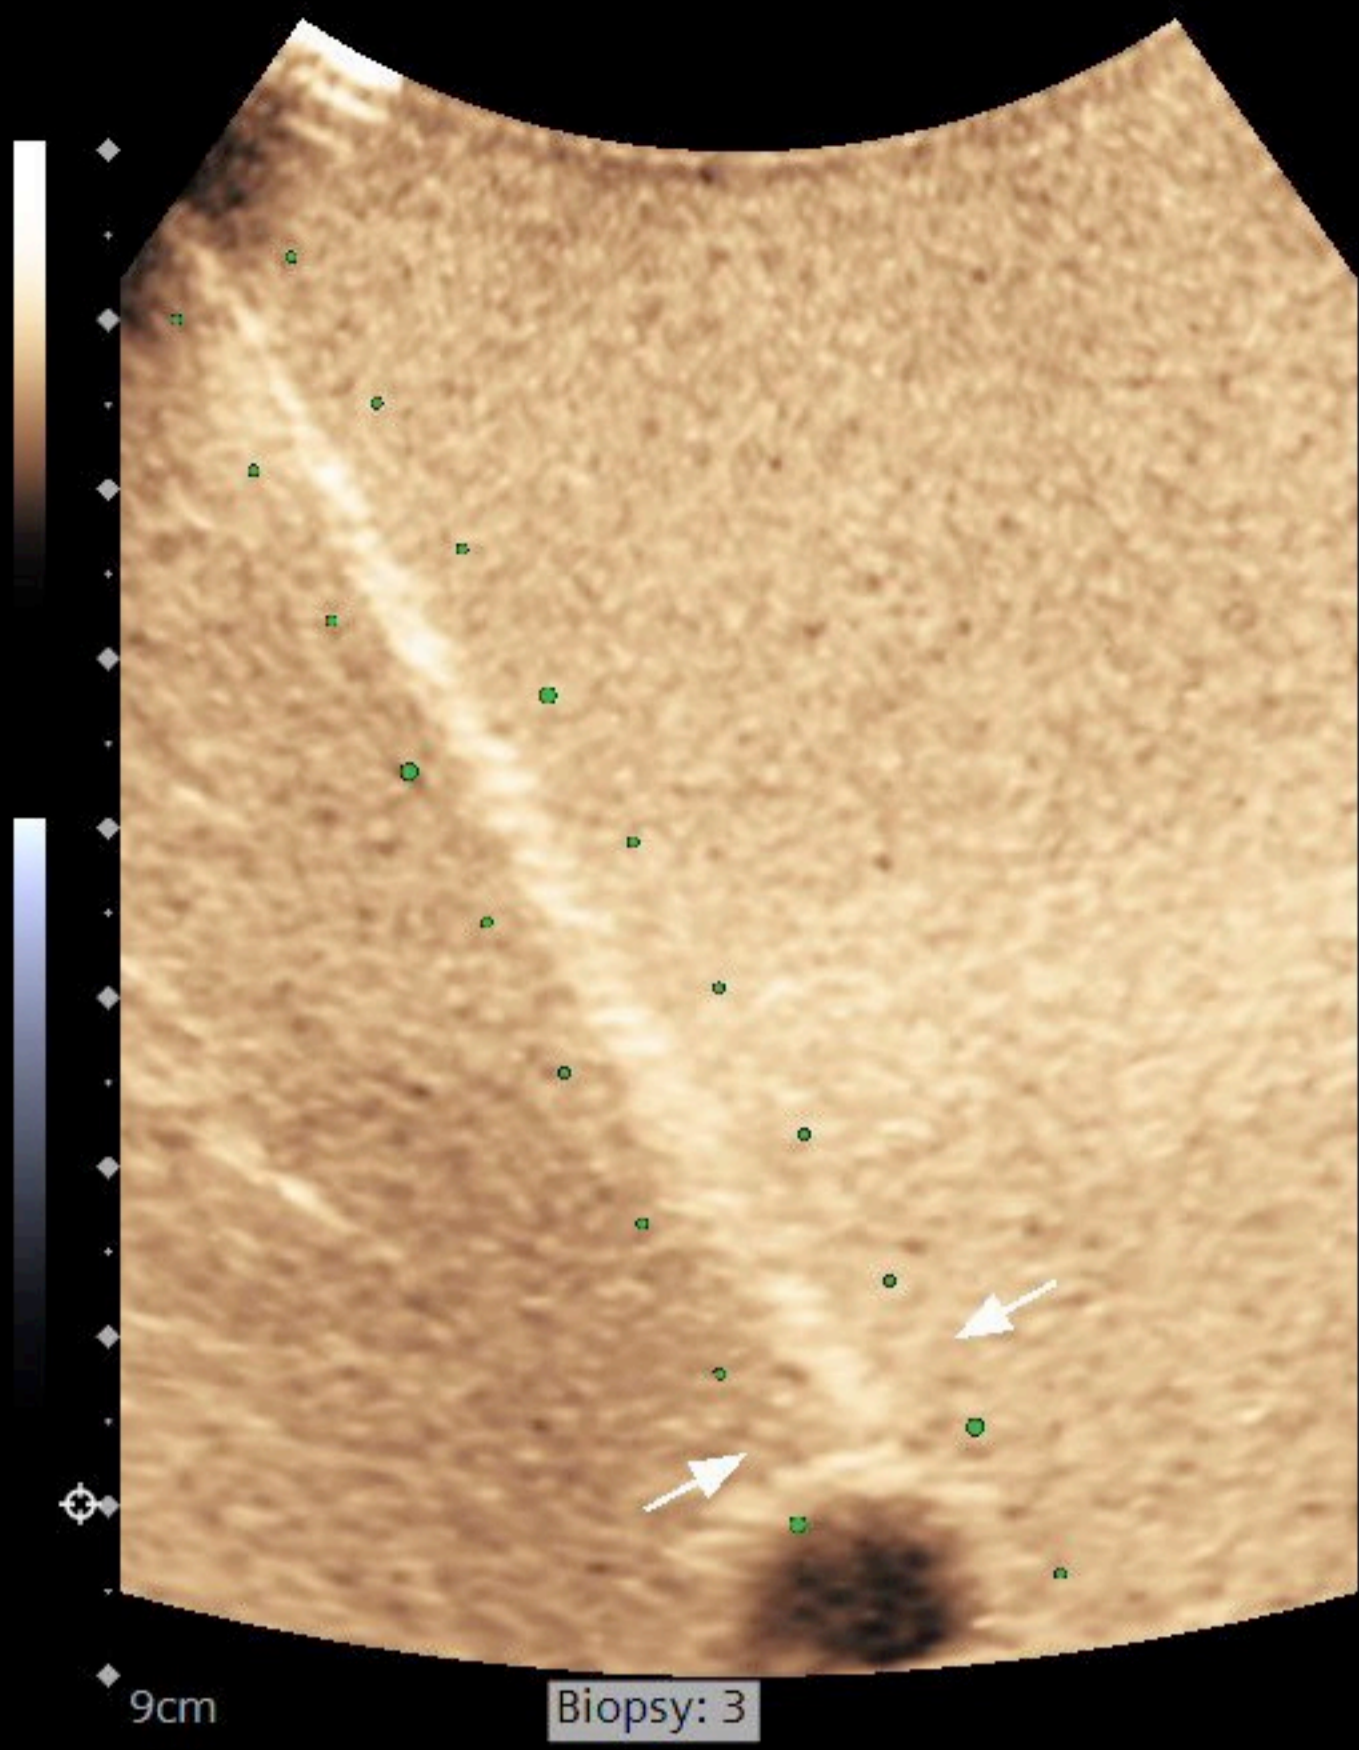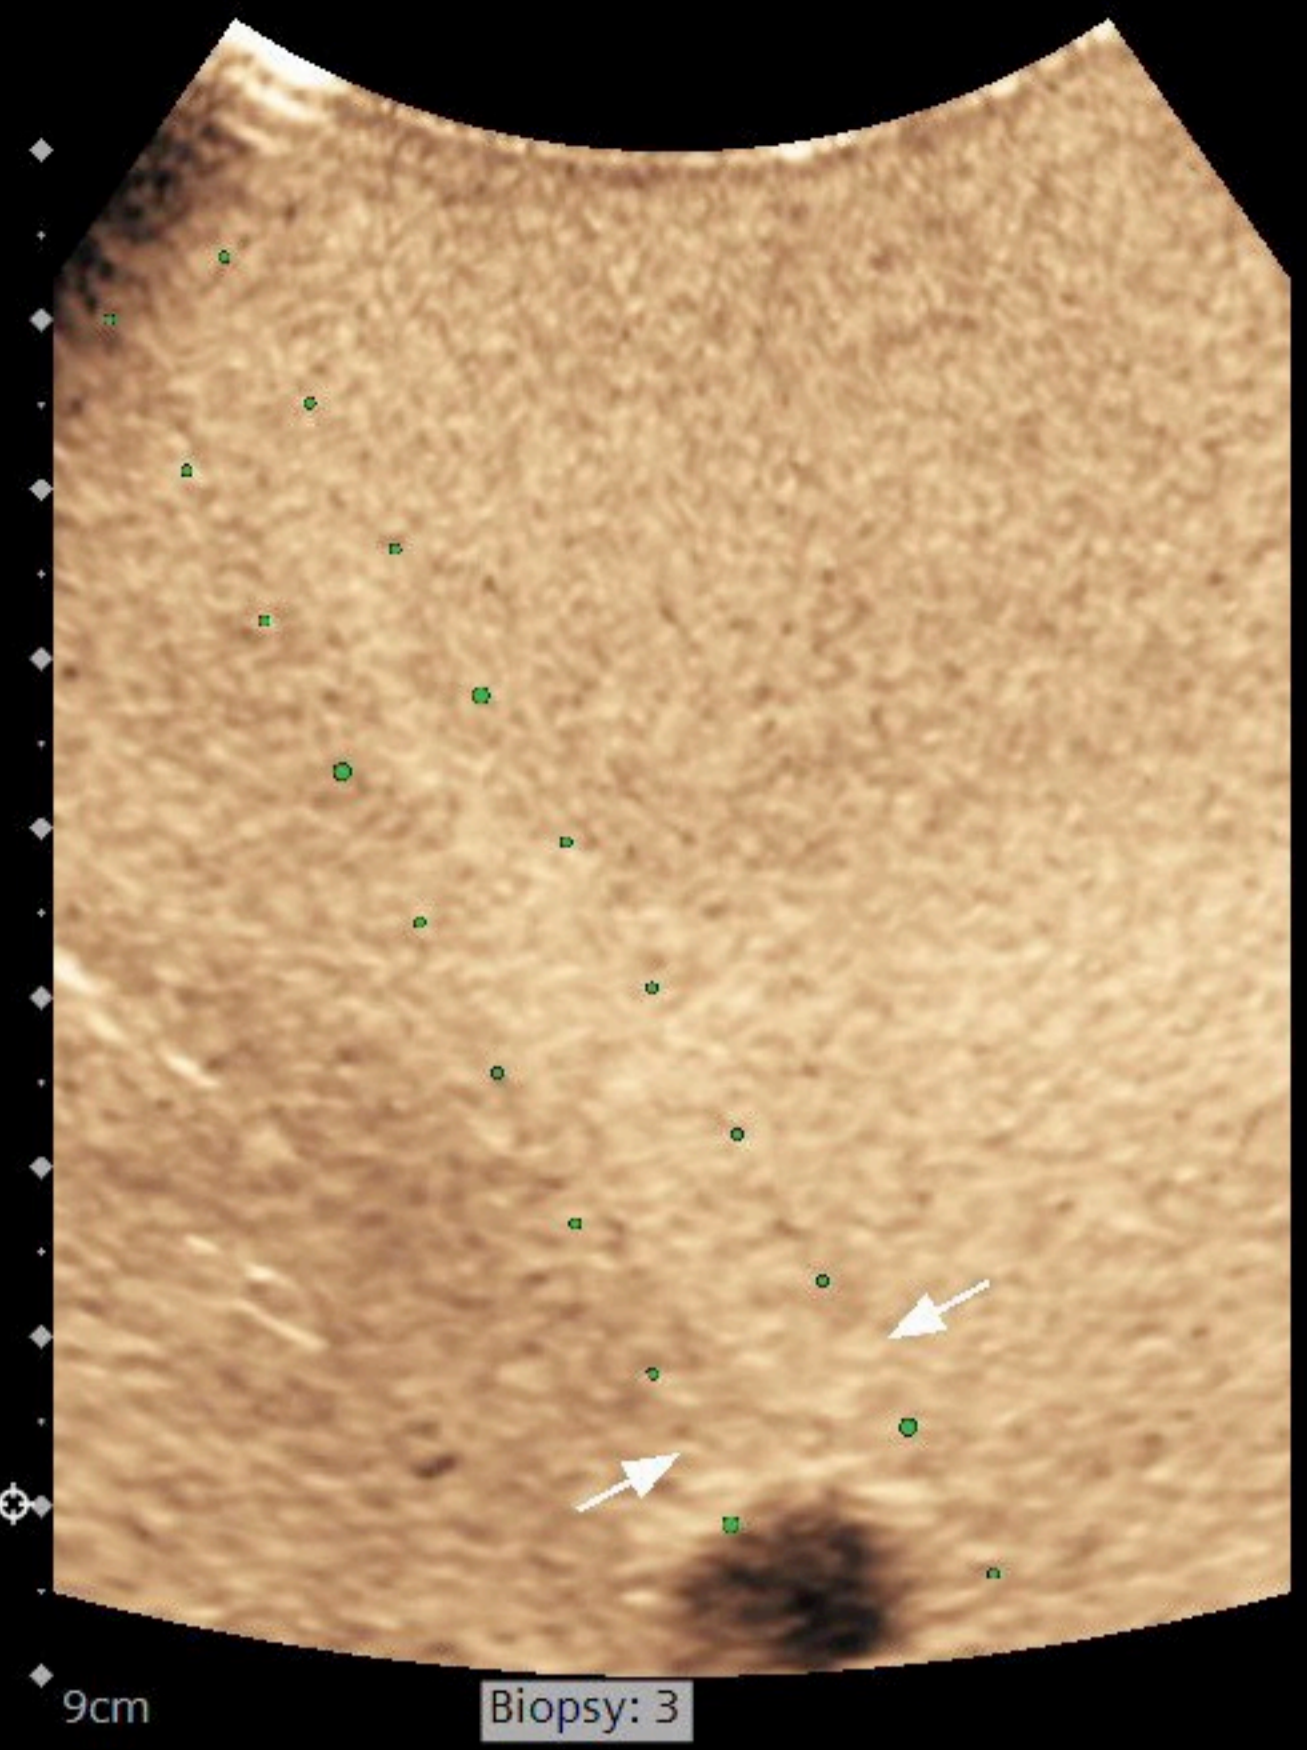

1st puncture

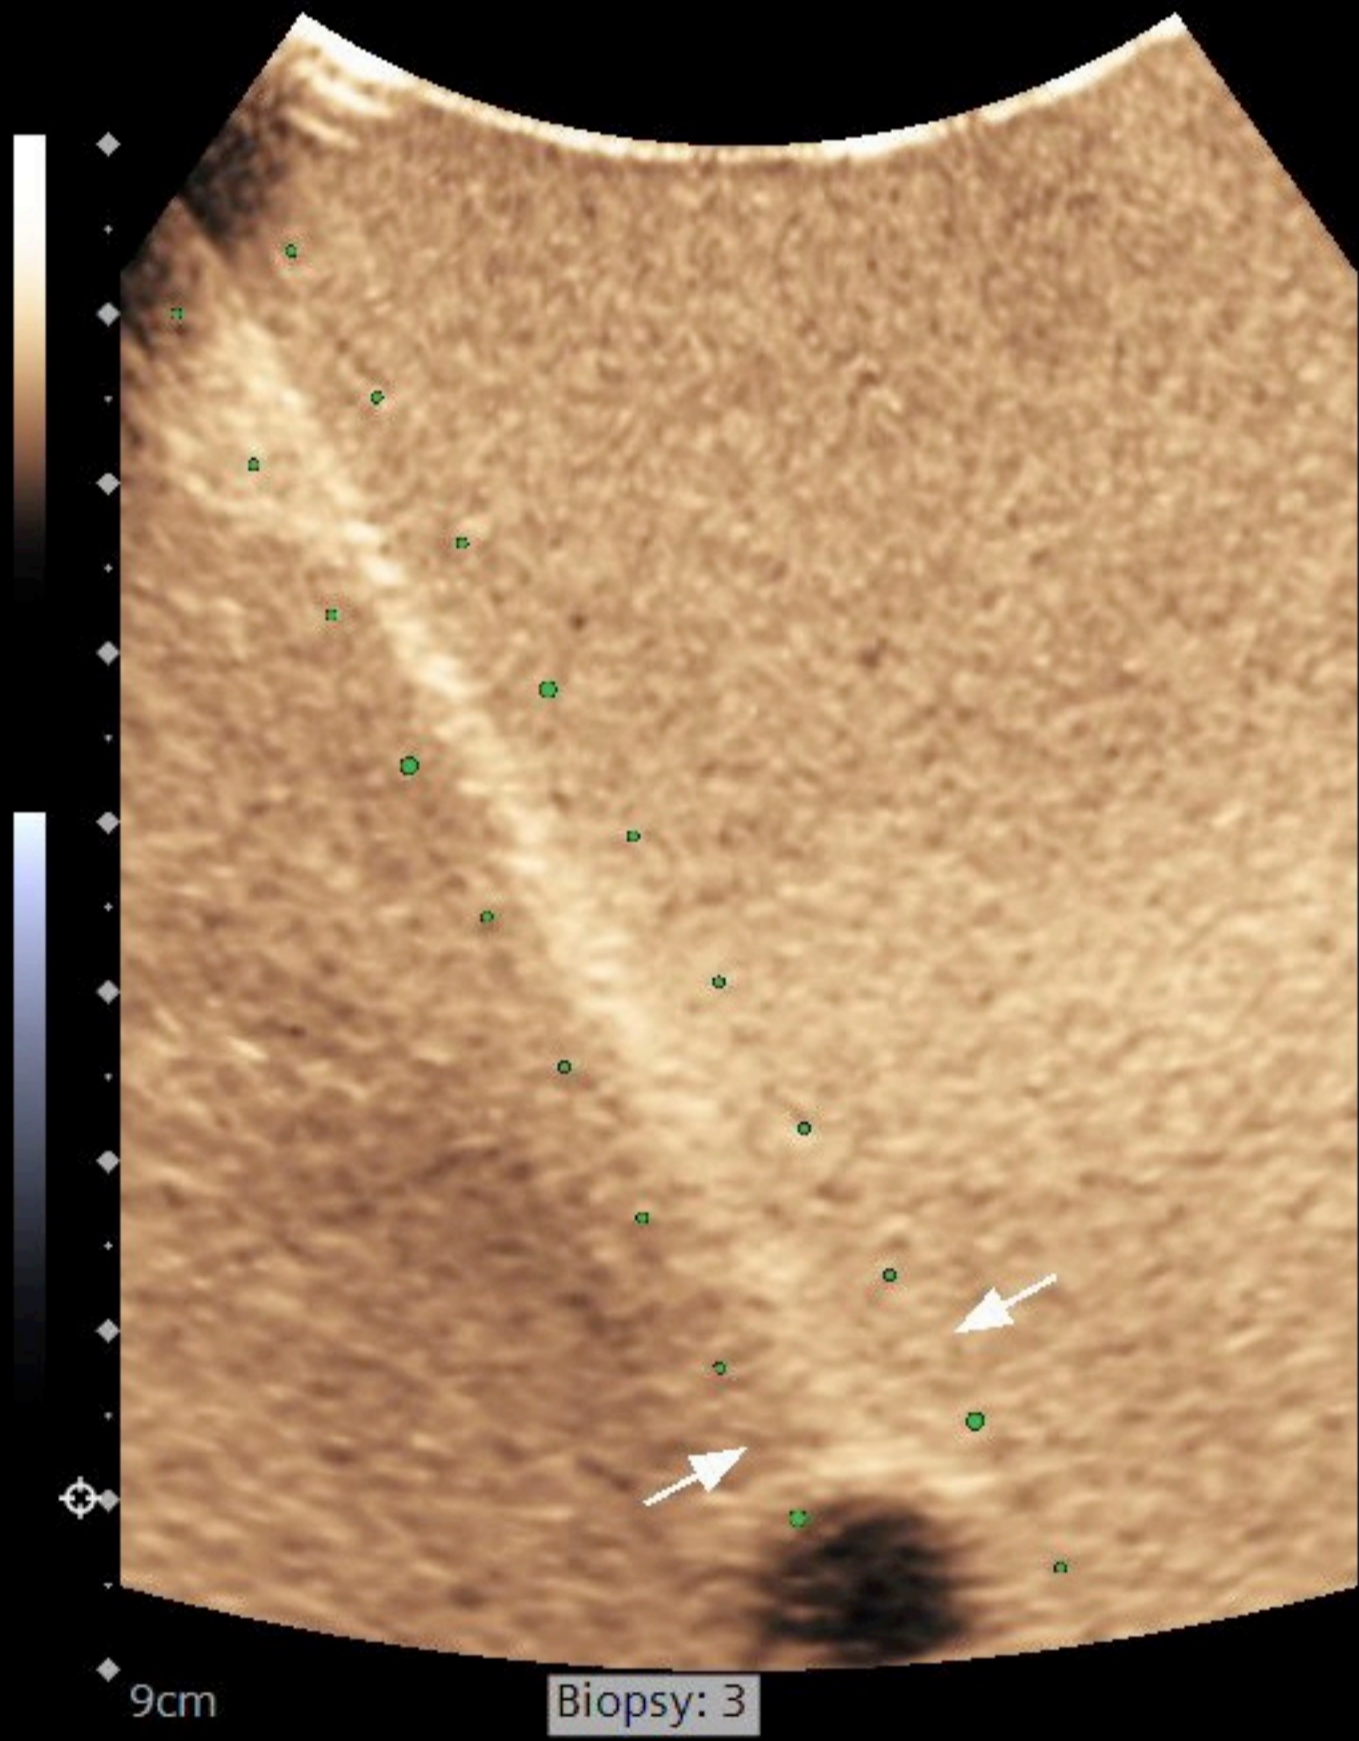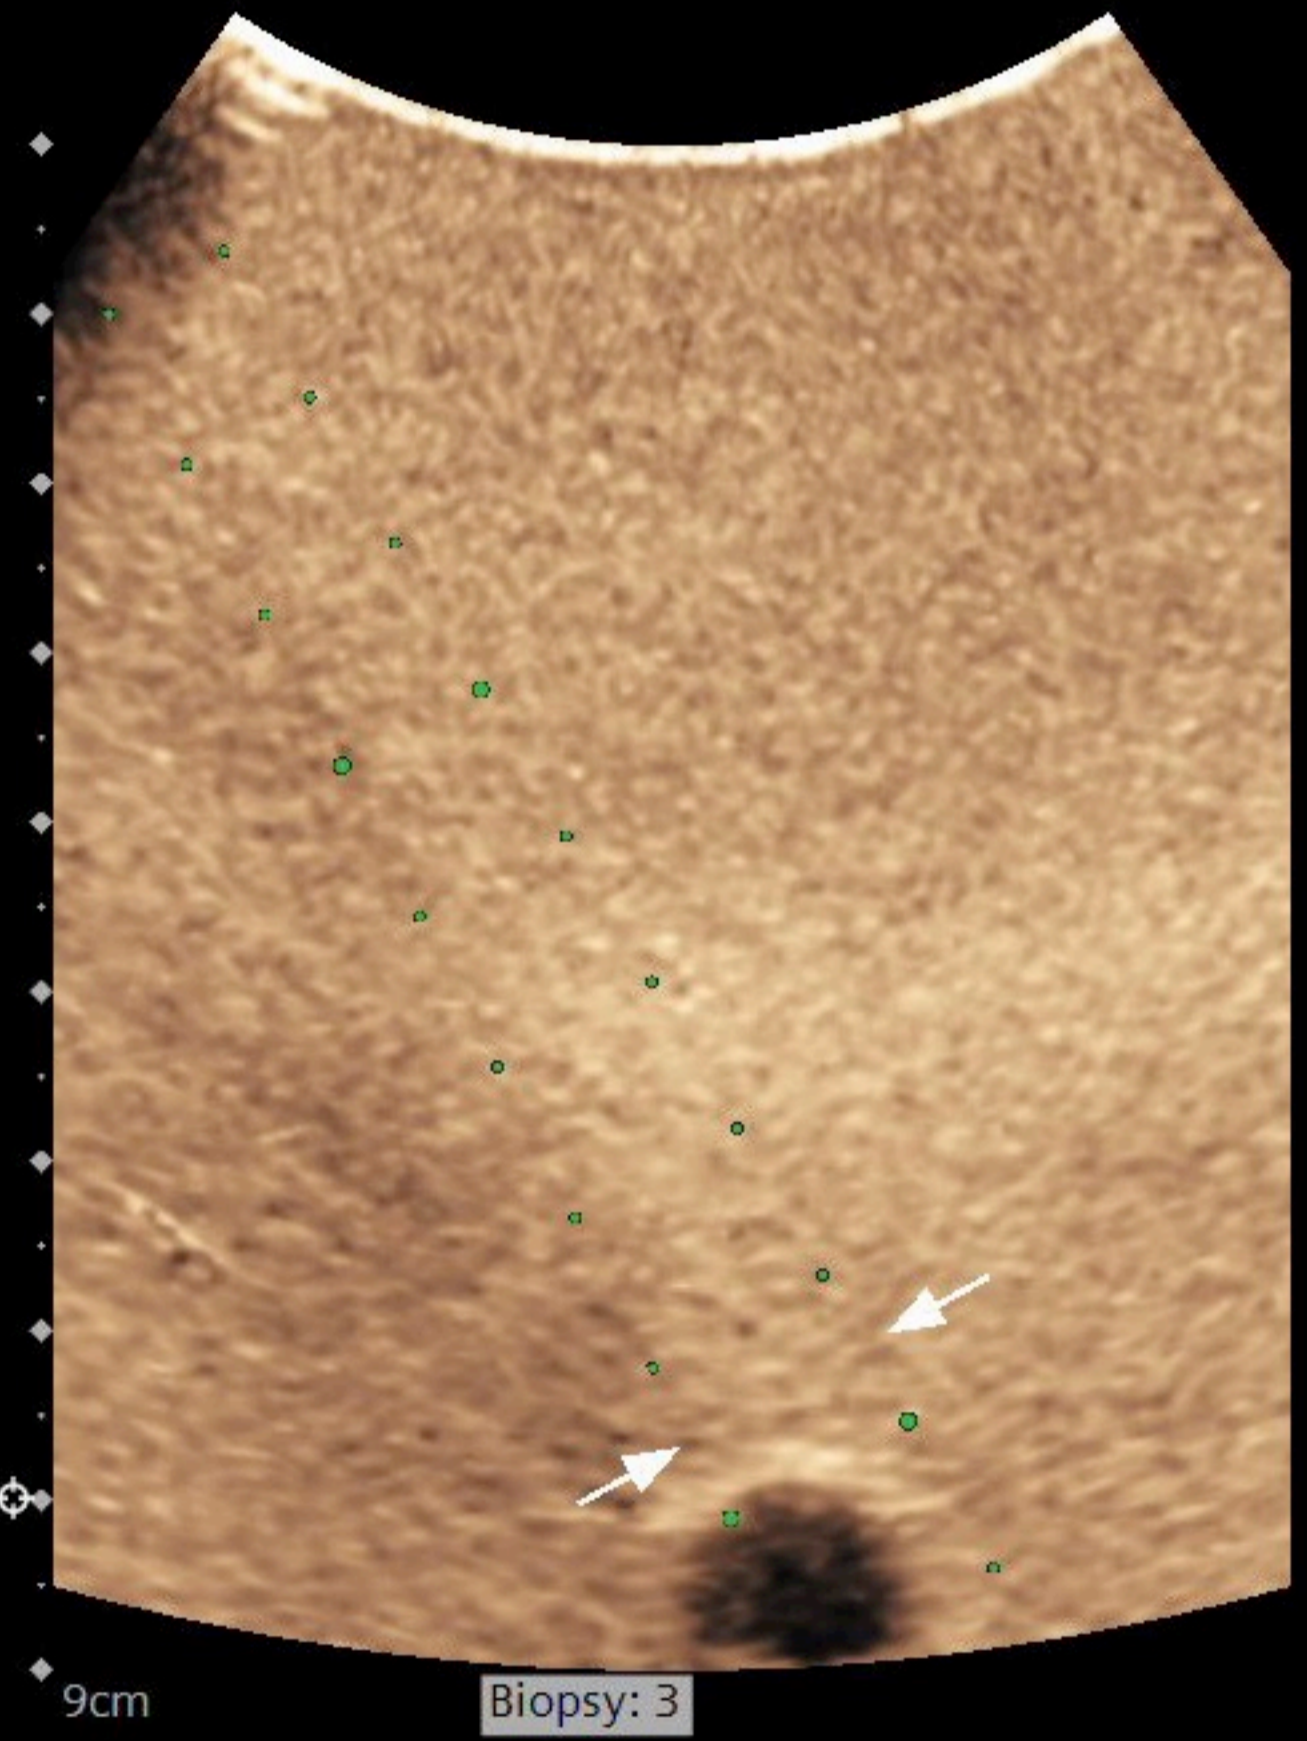

2nd puncture

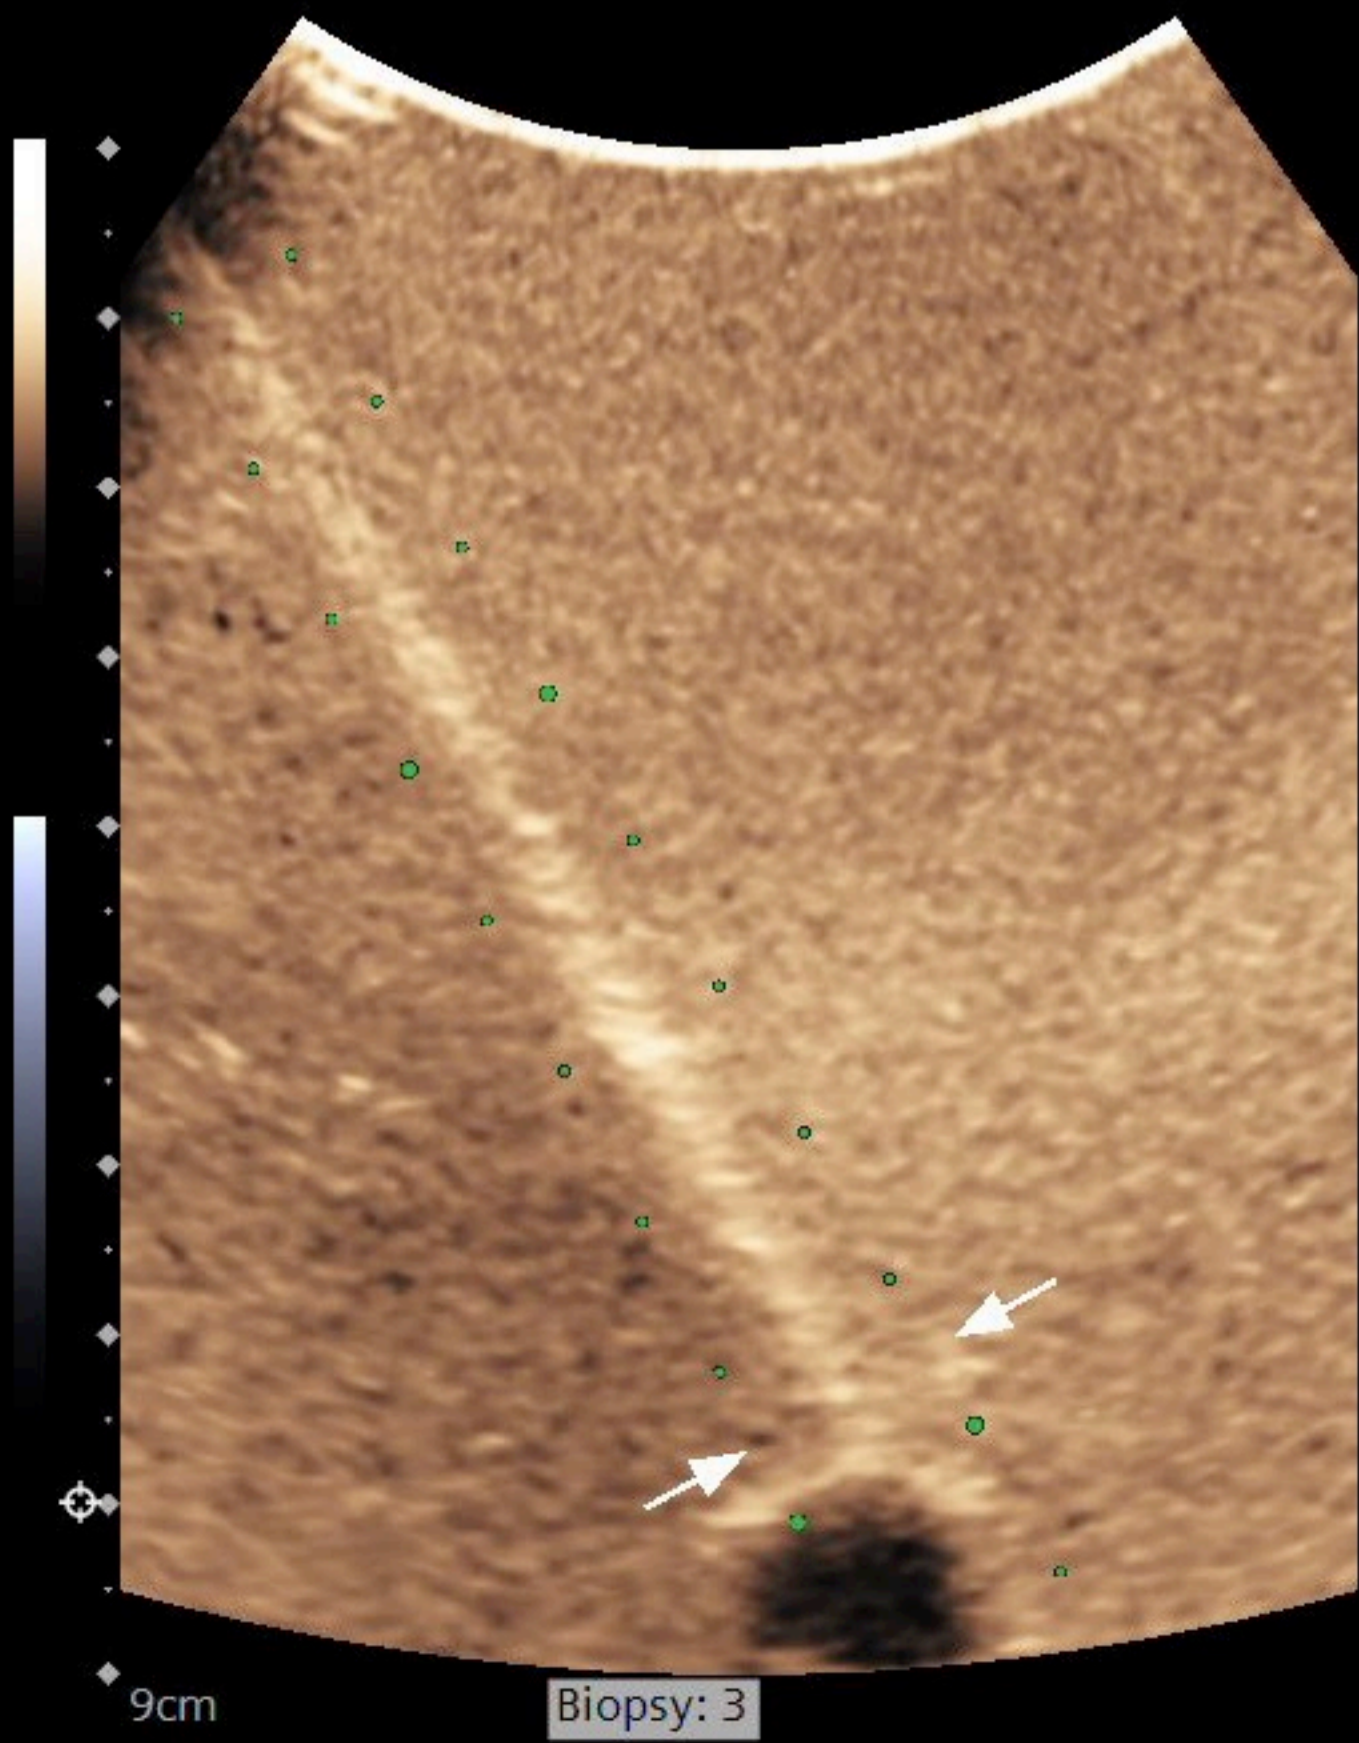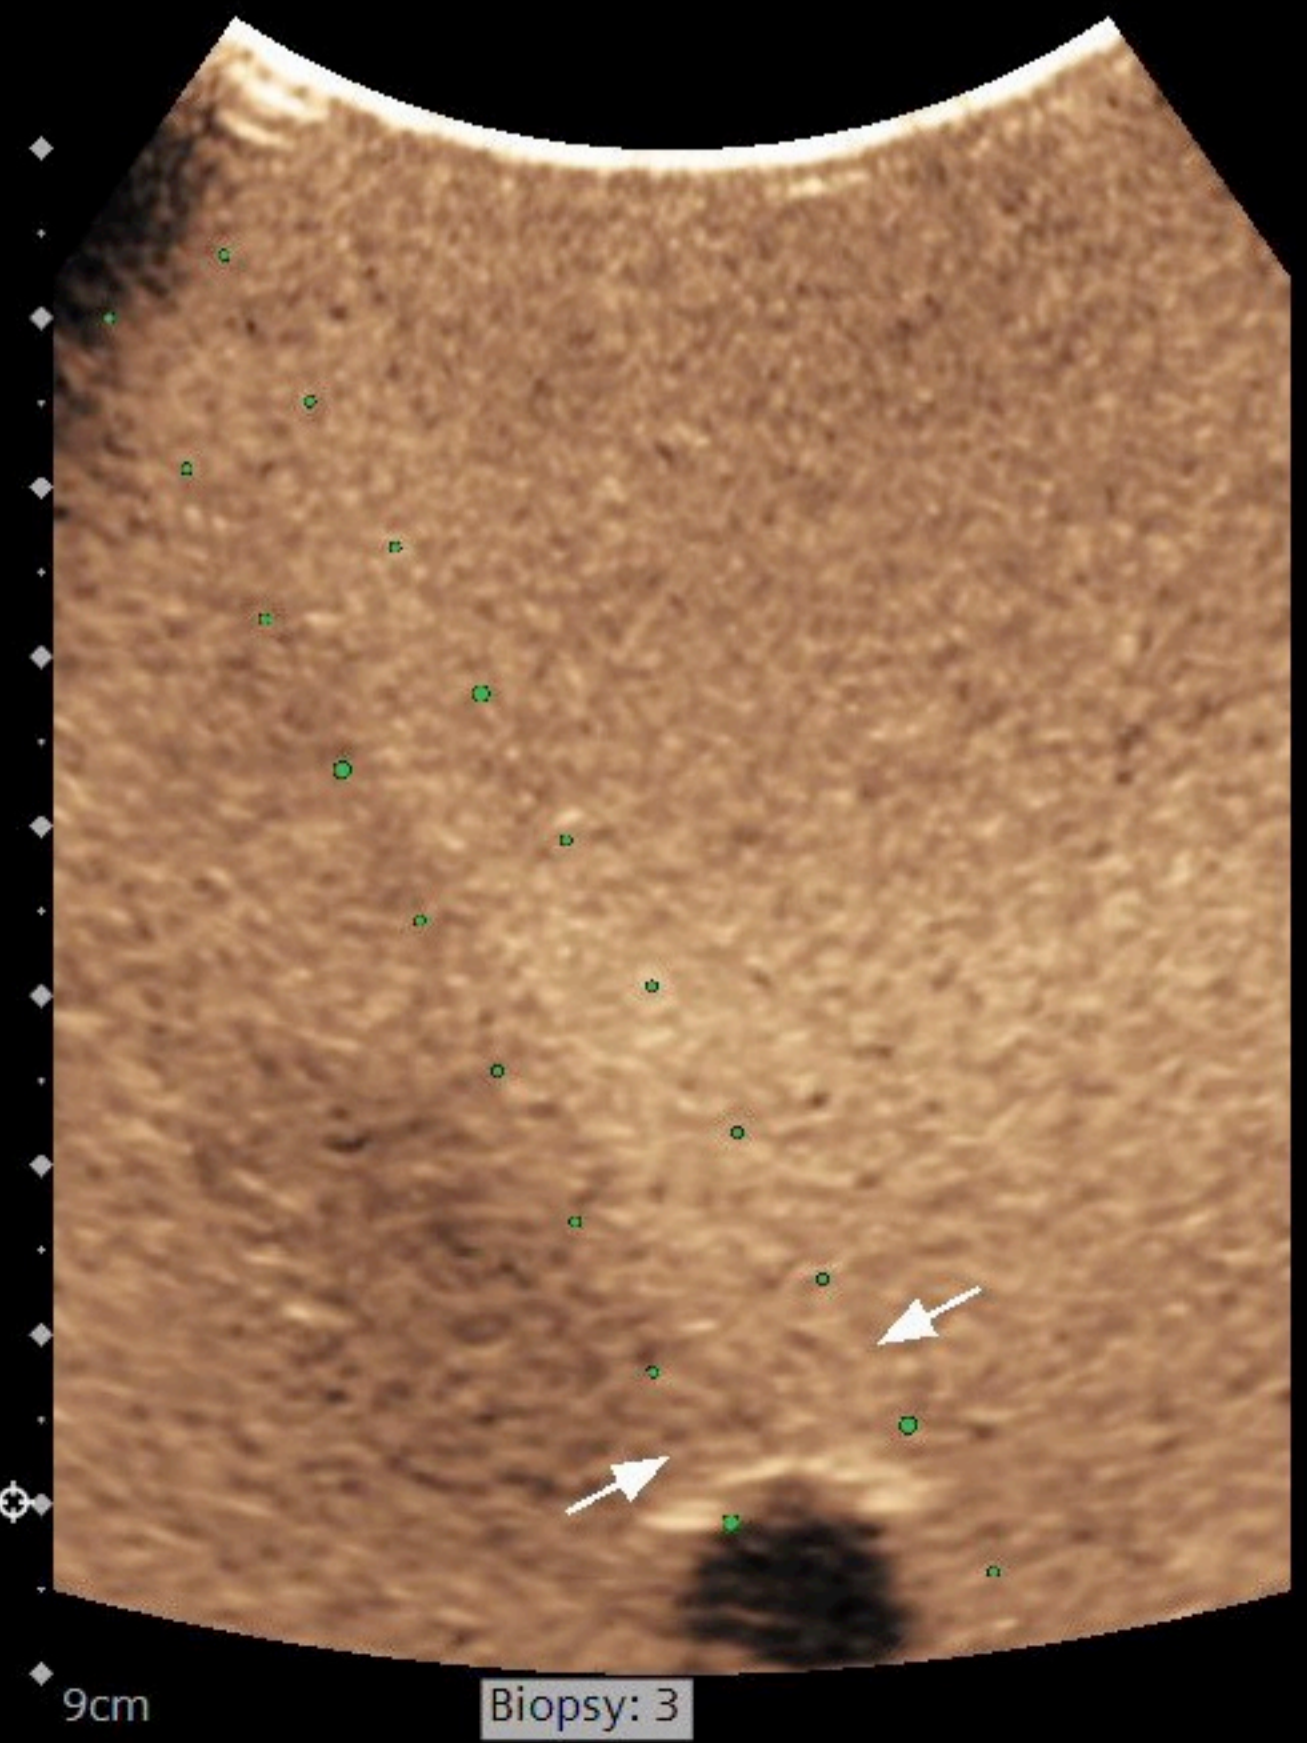

3rd puncture

Ultrasound contrast agent

Control



Introducer needle (set 9/10)

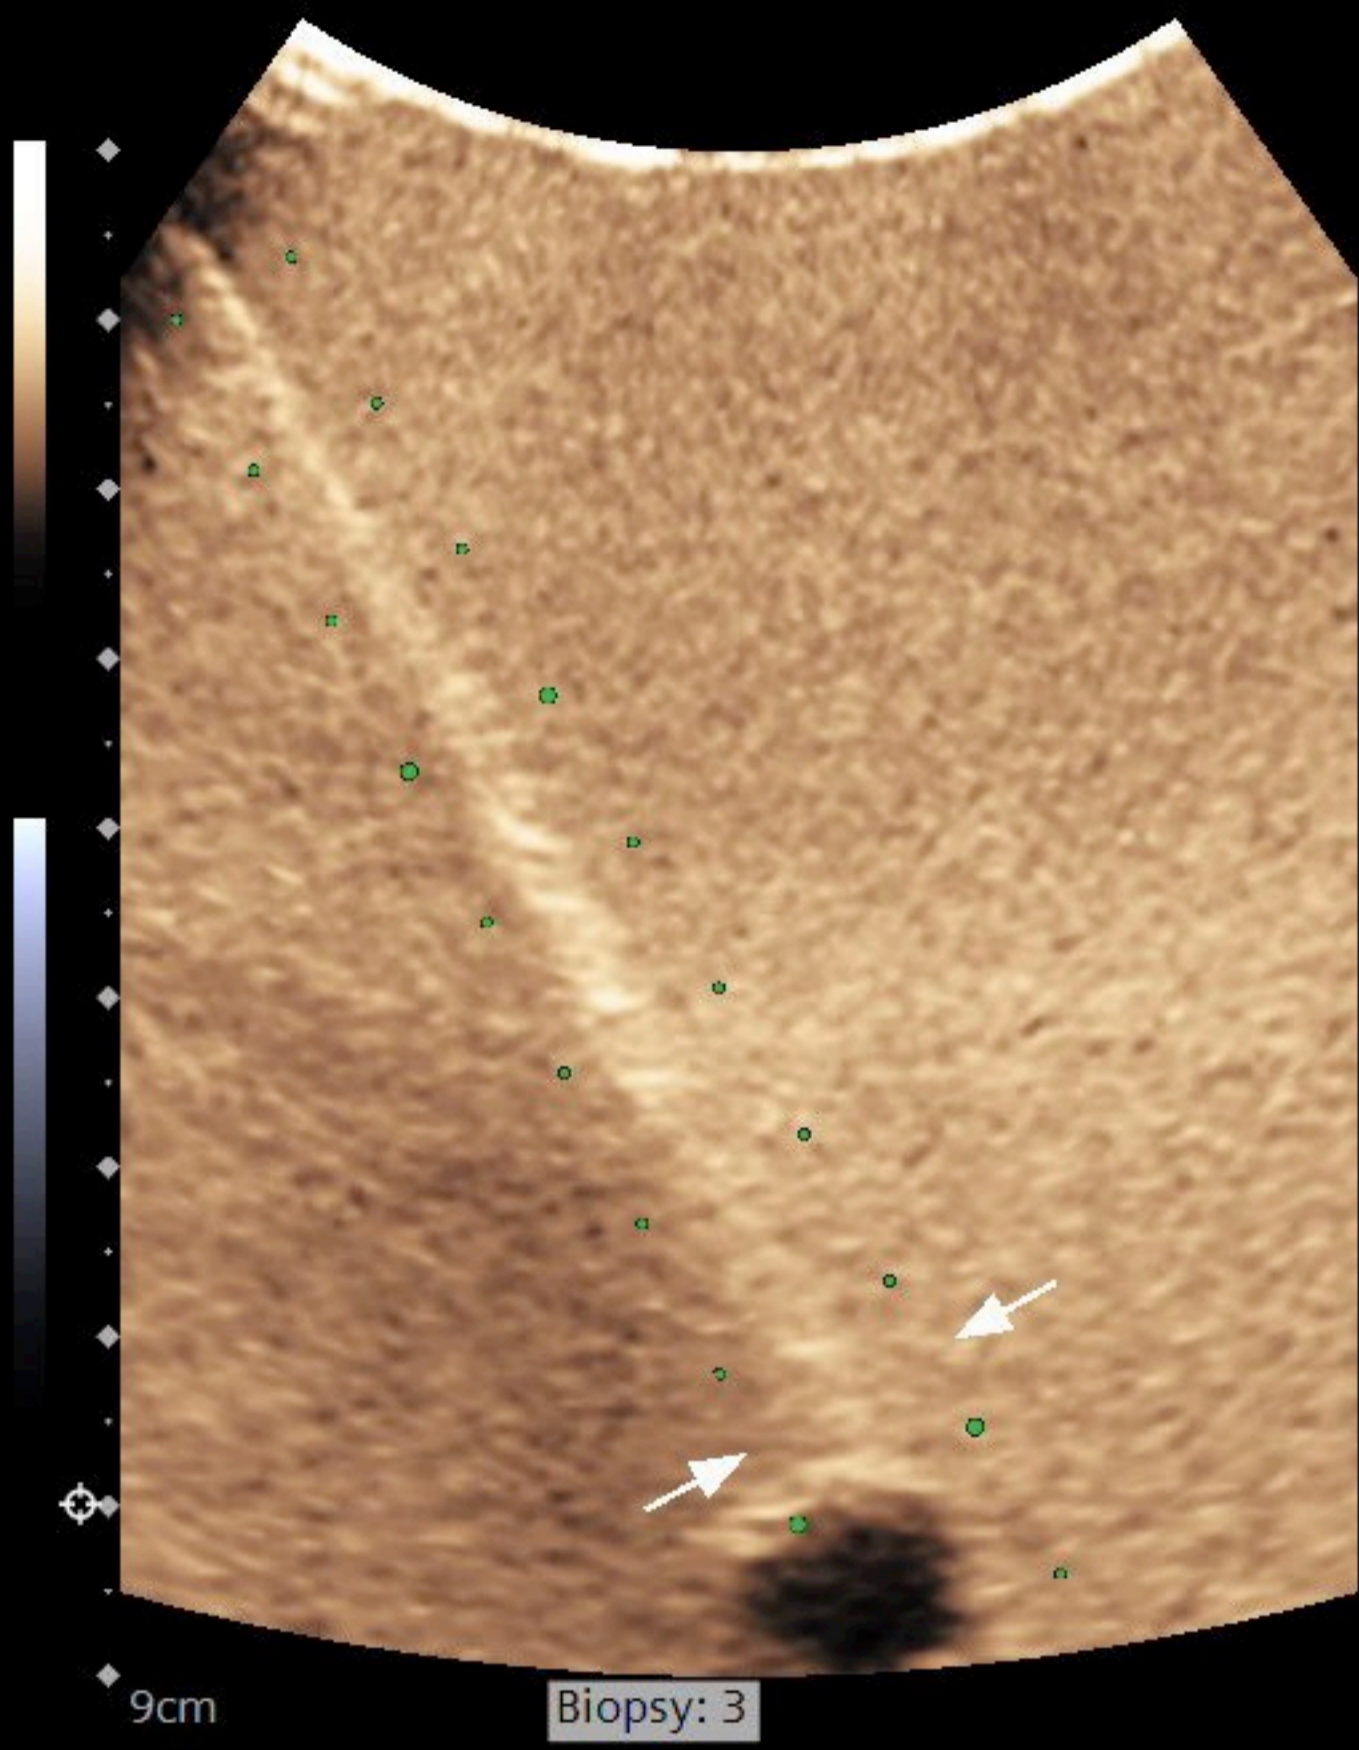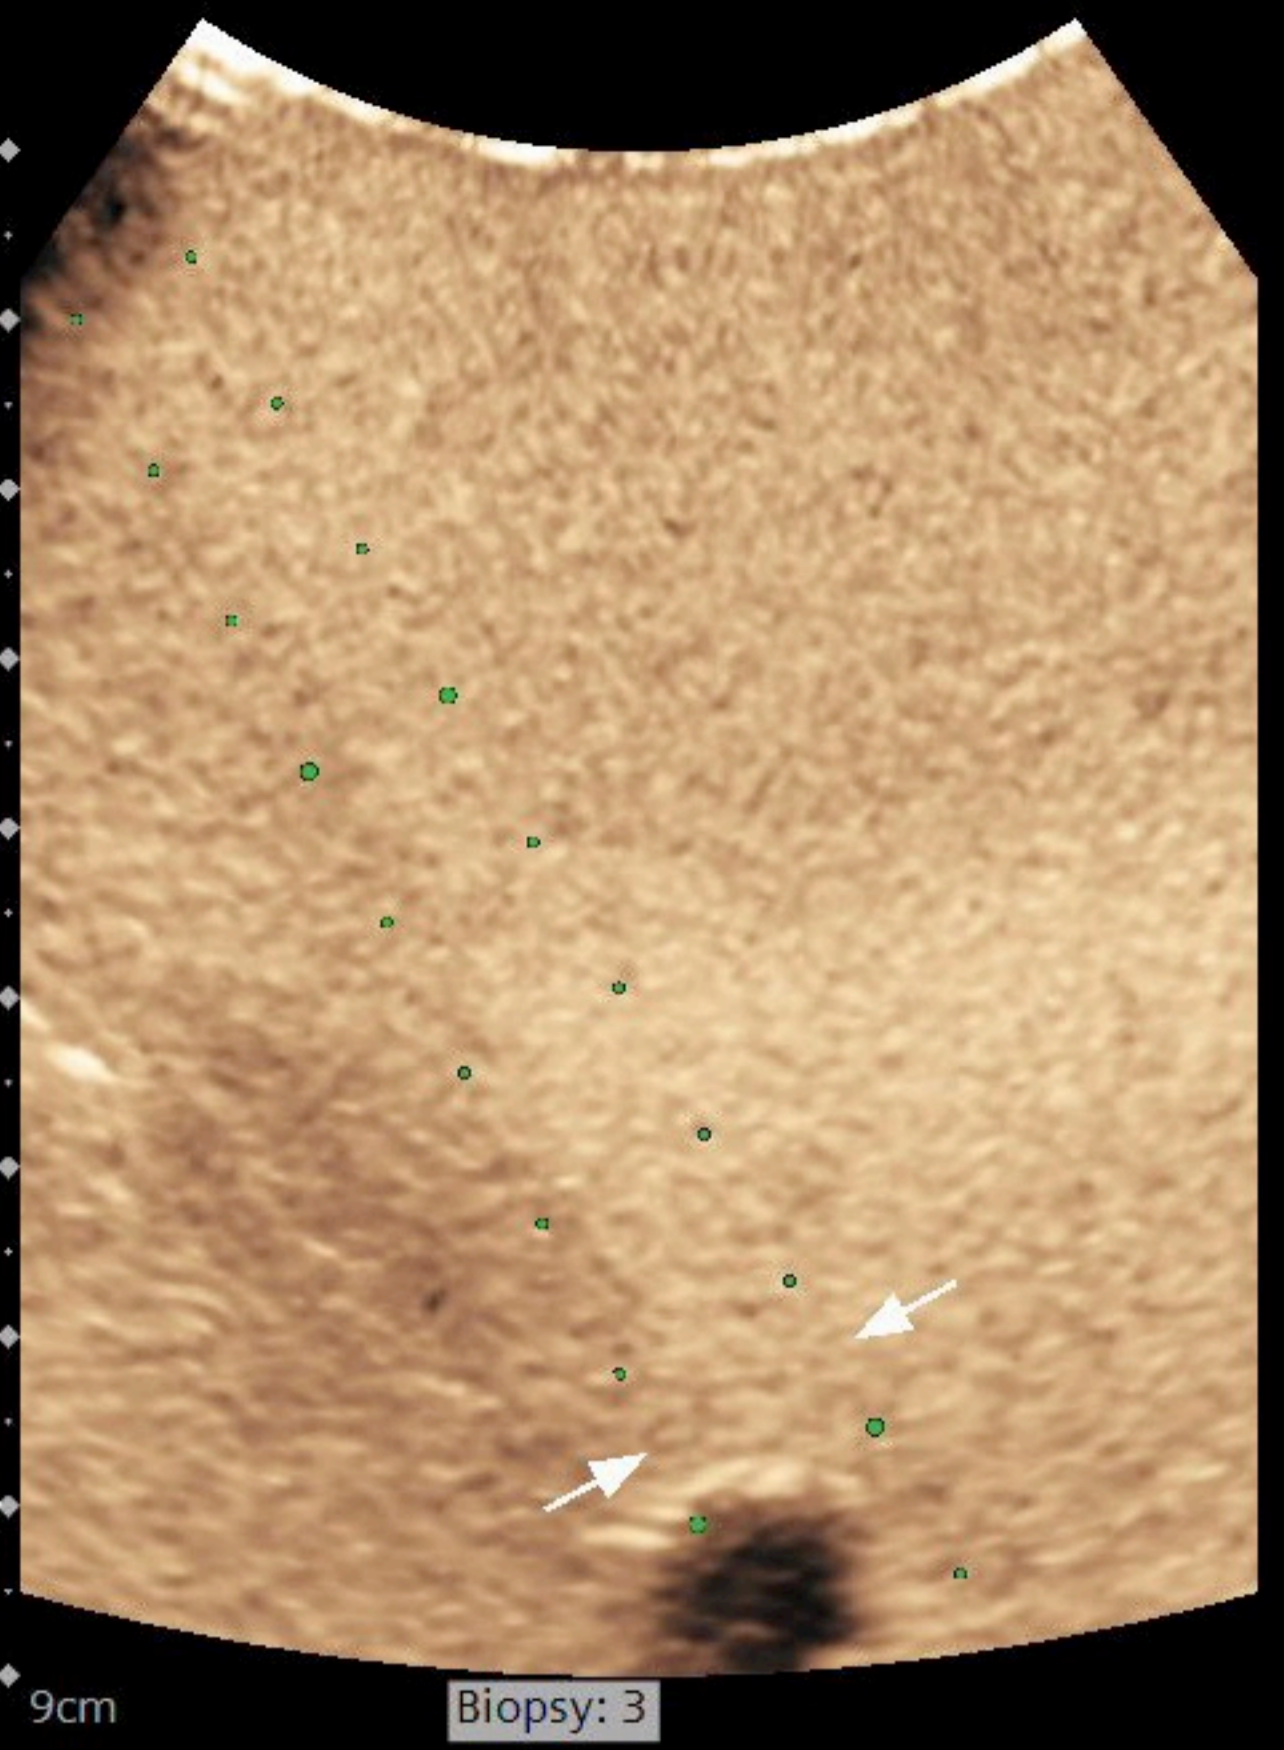

1st puncture

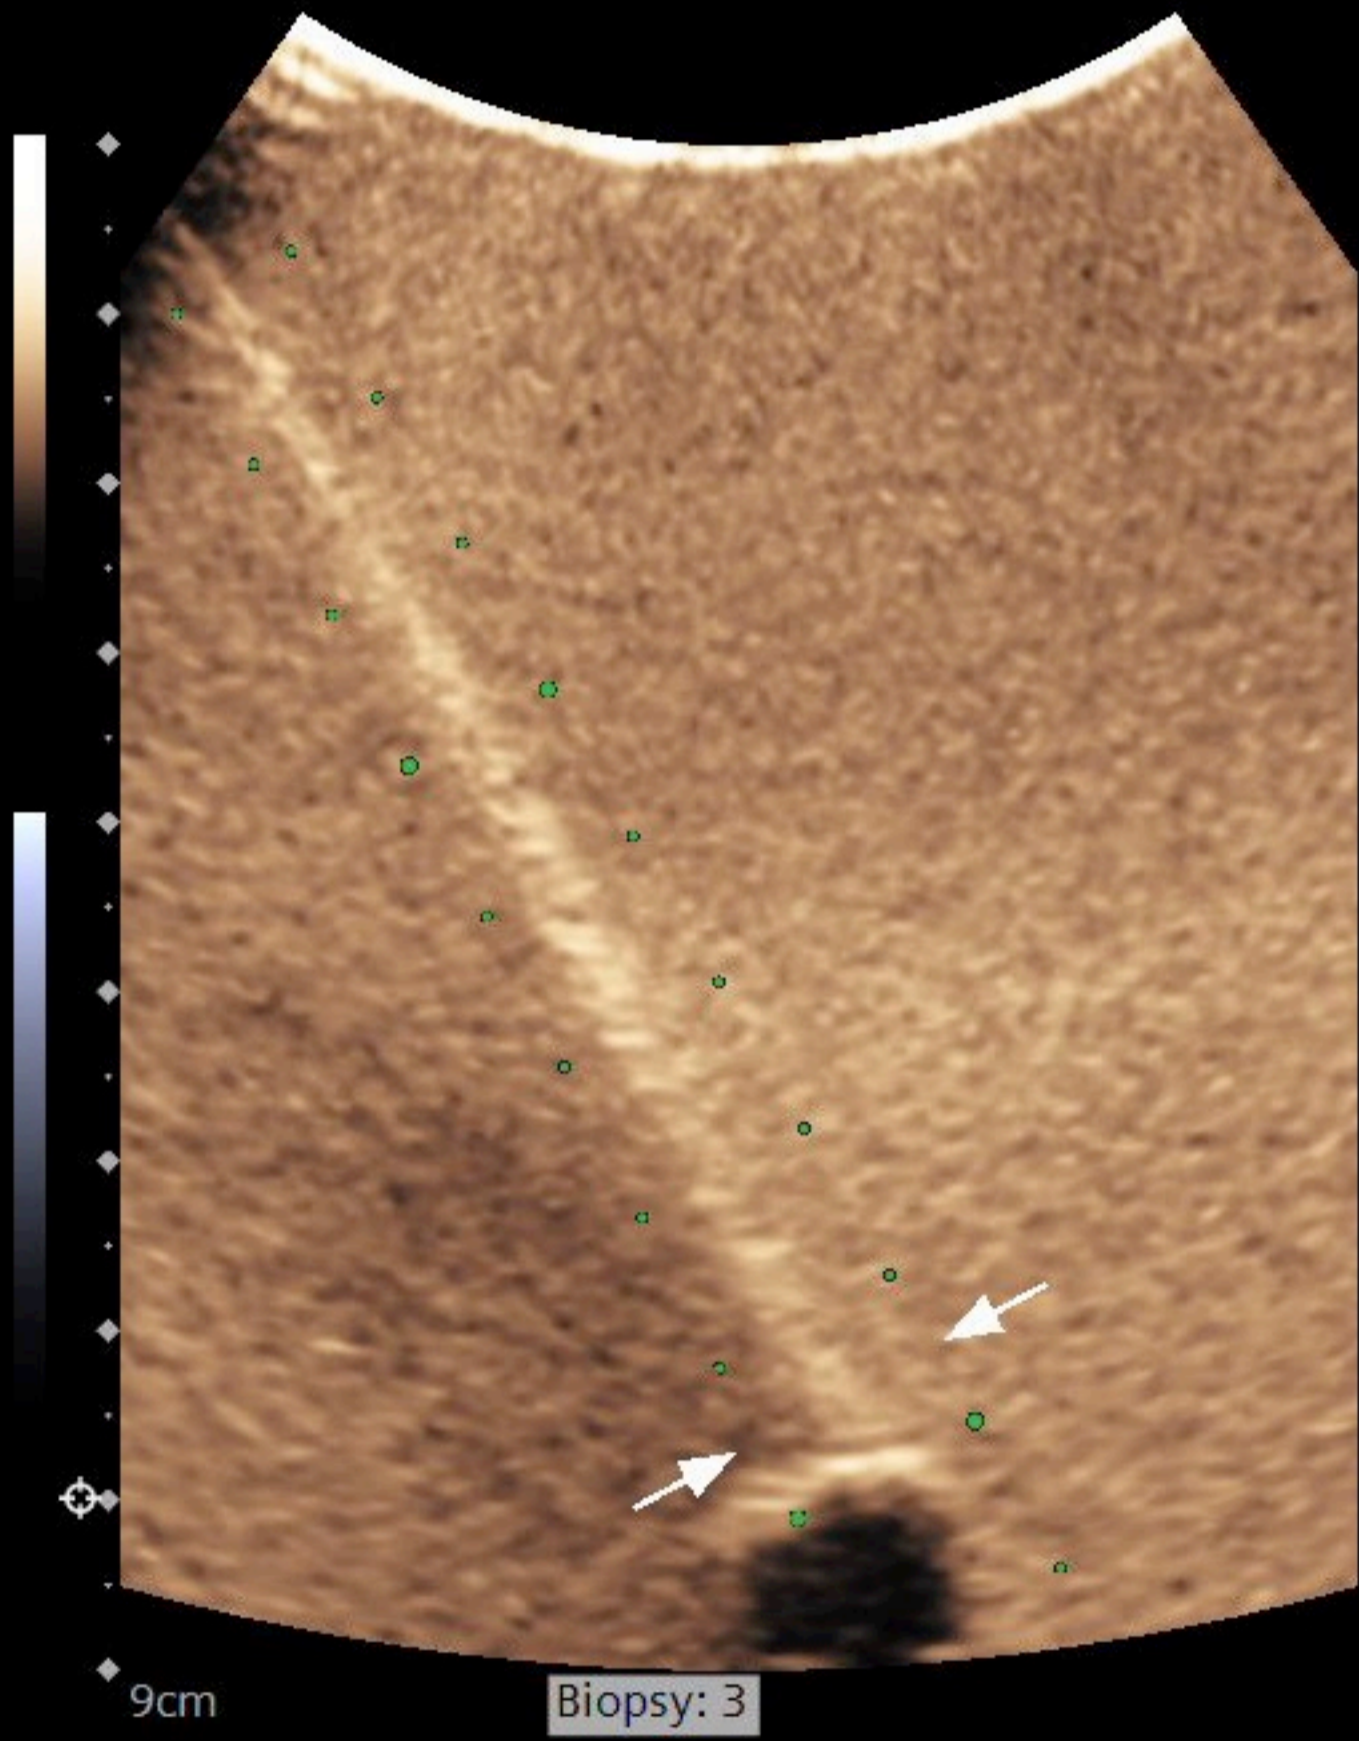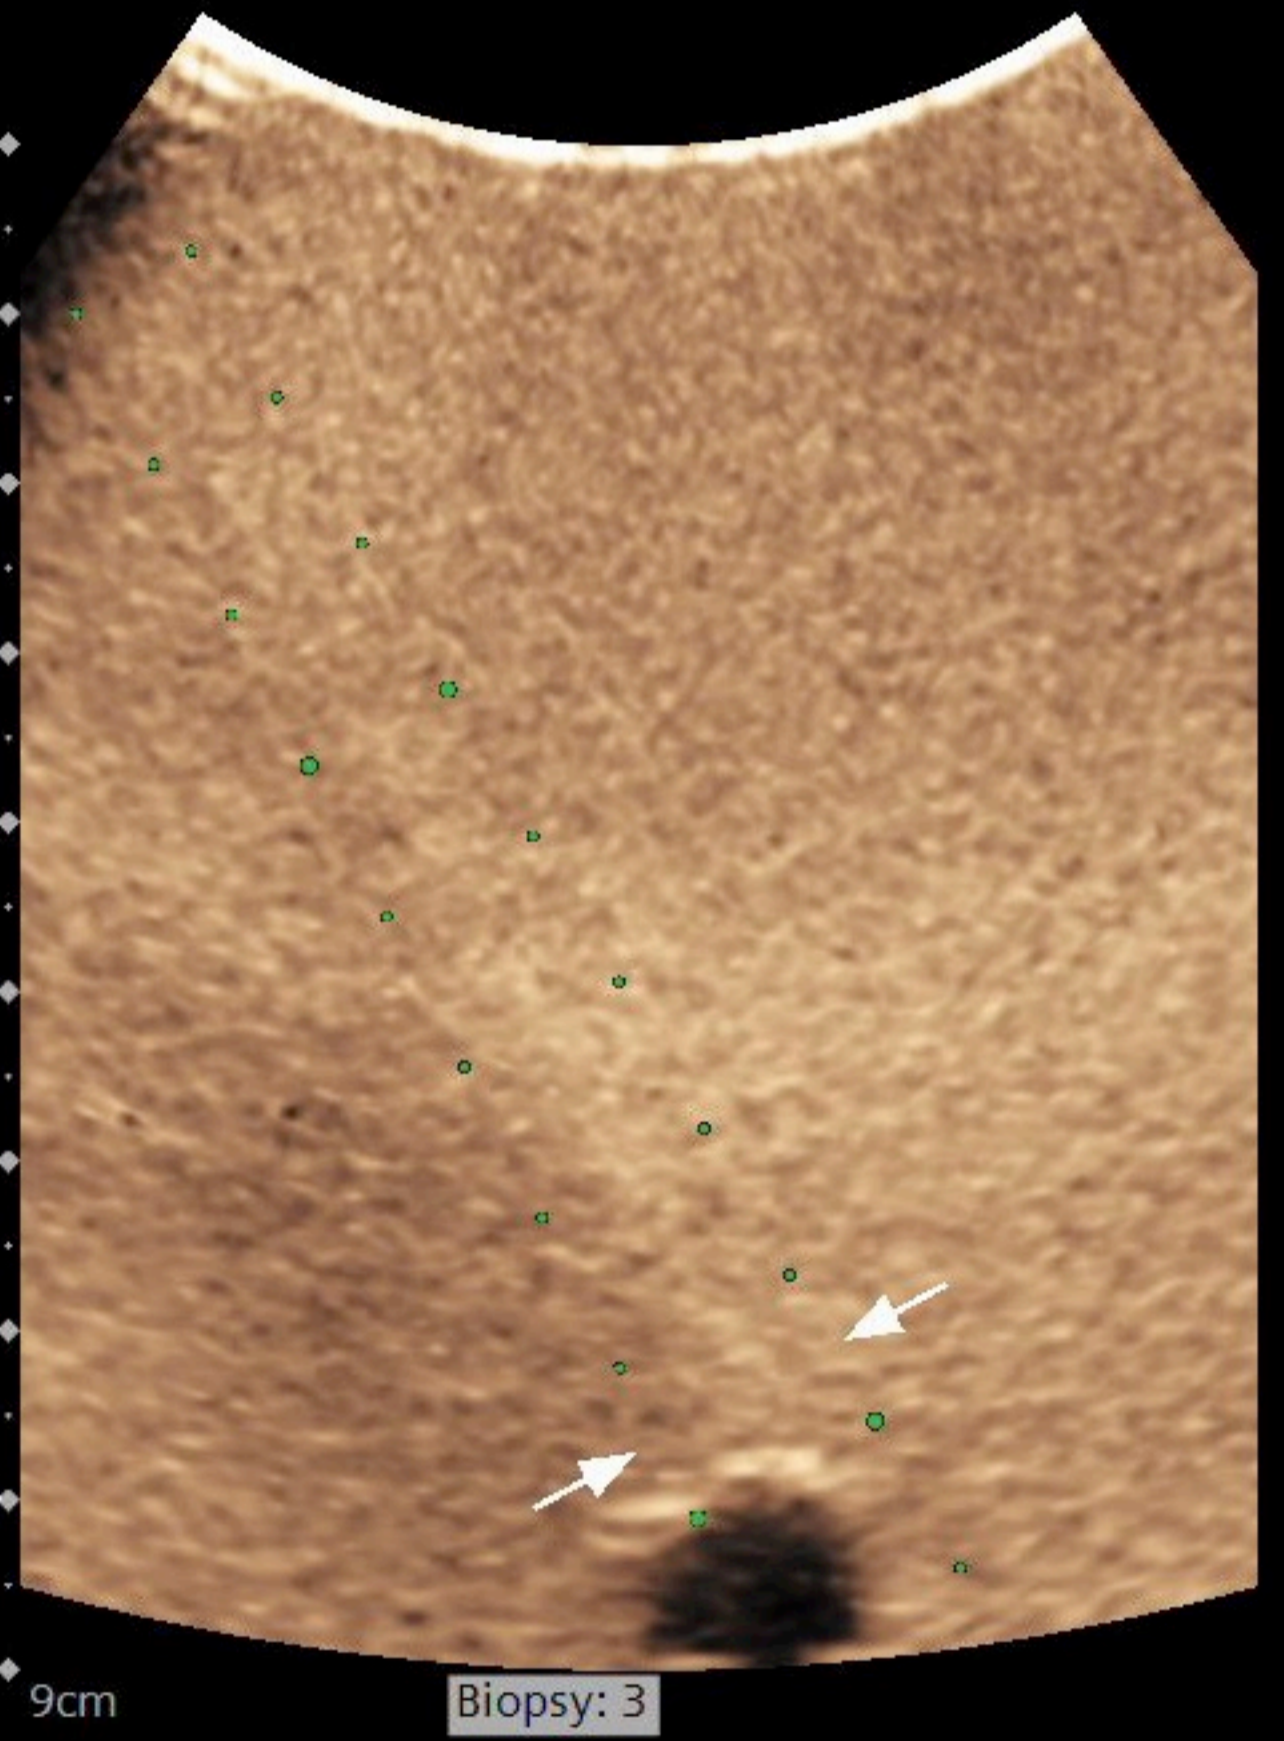

2nd puncture

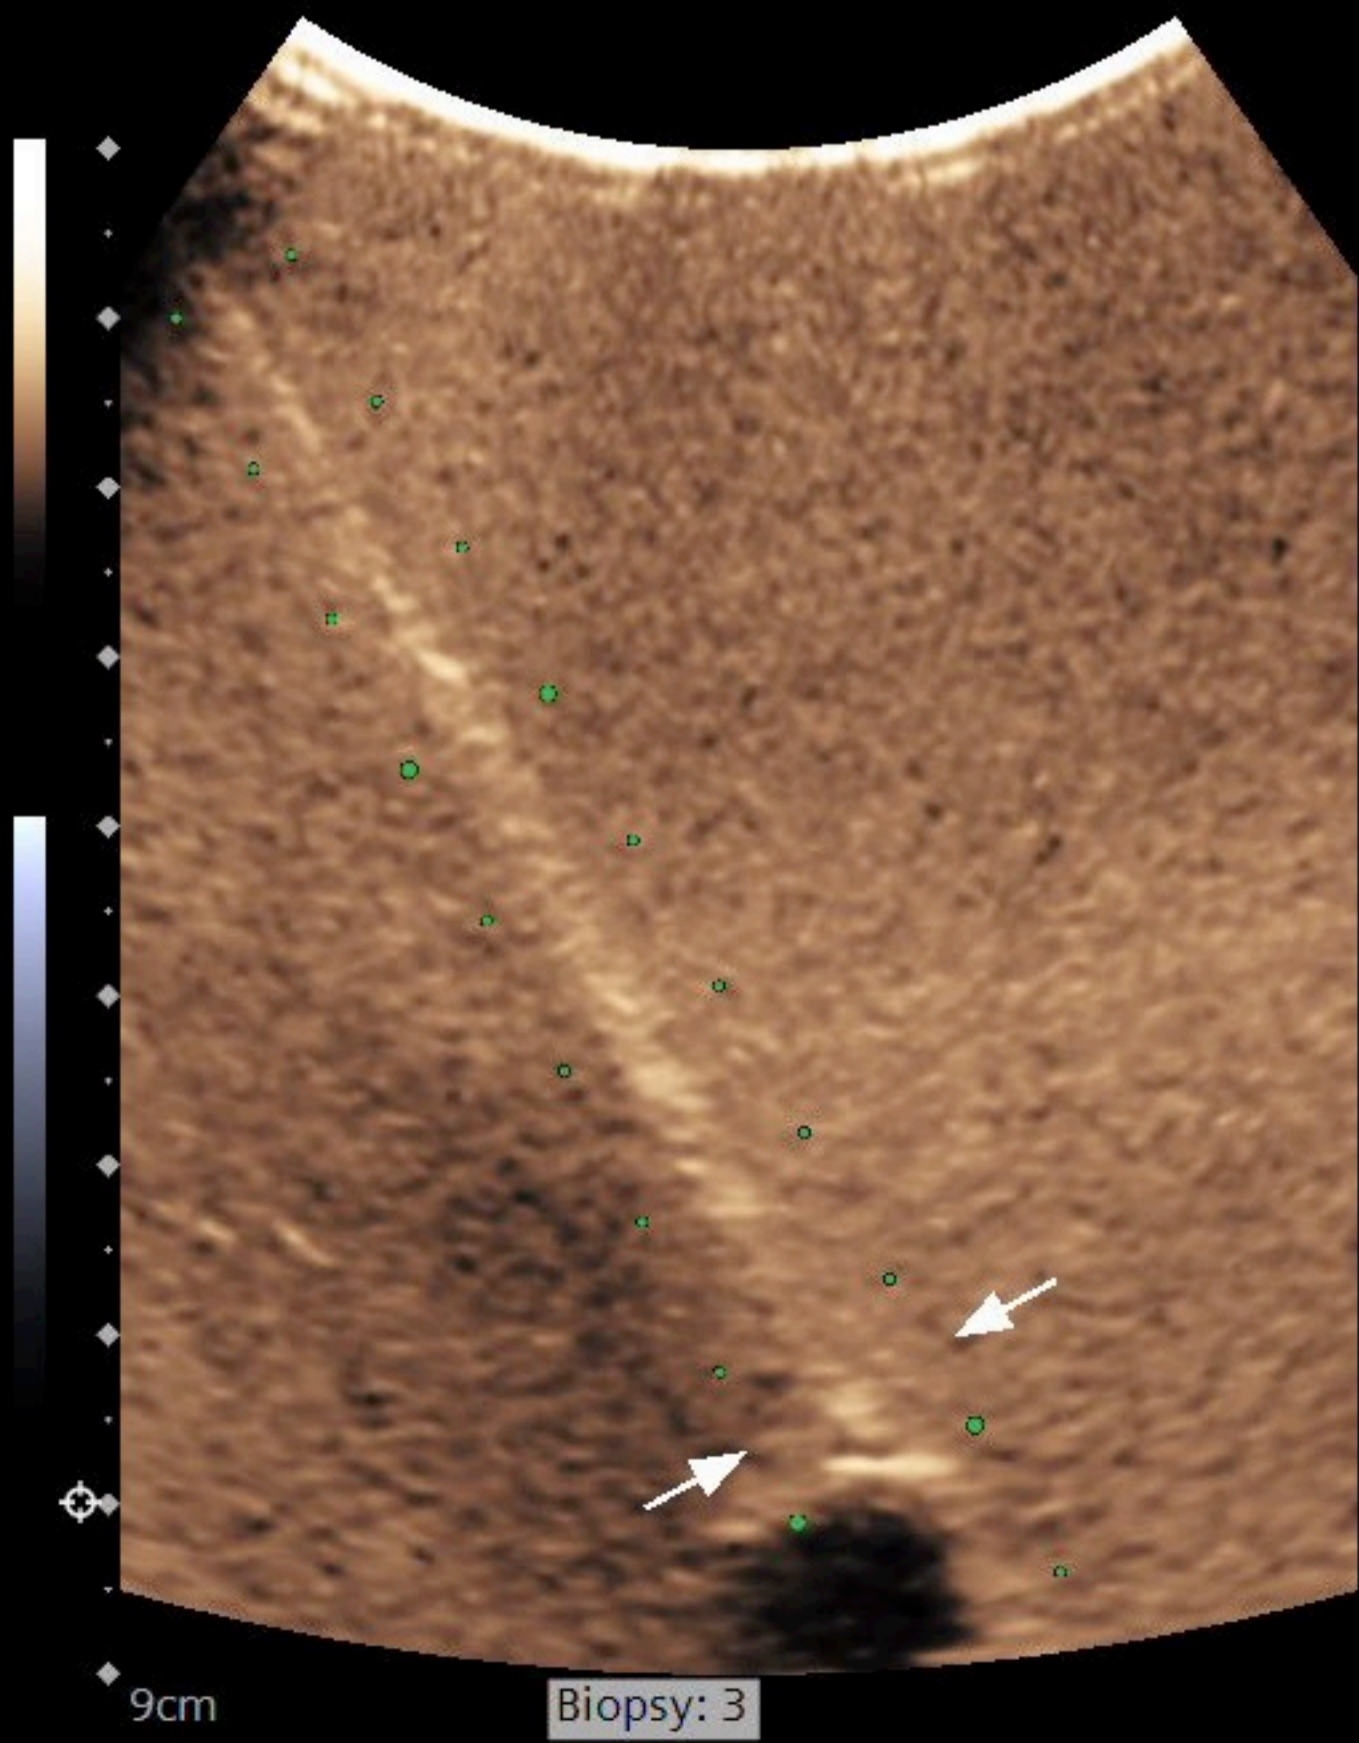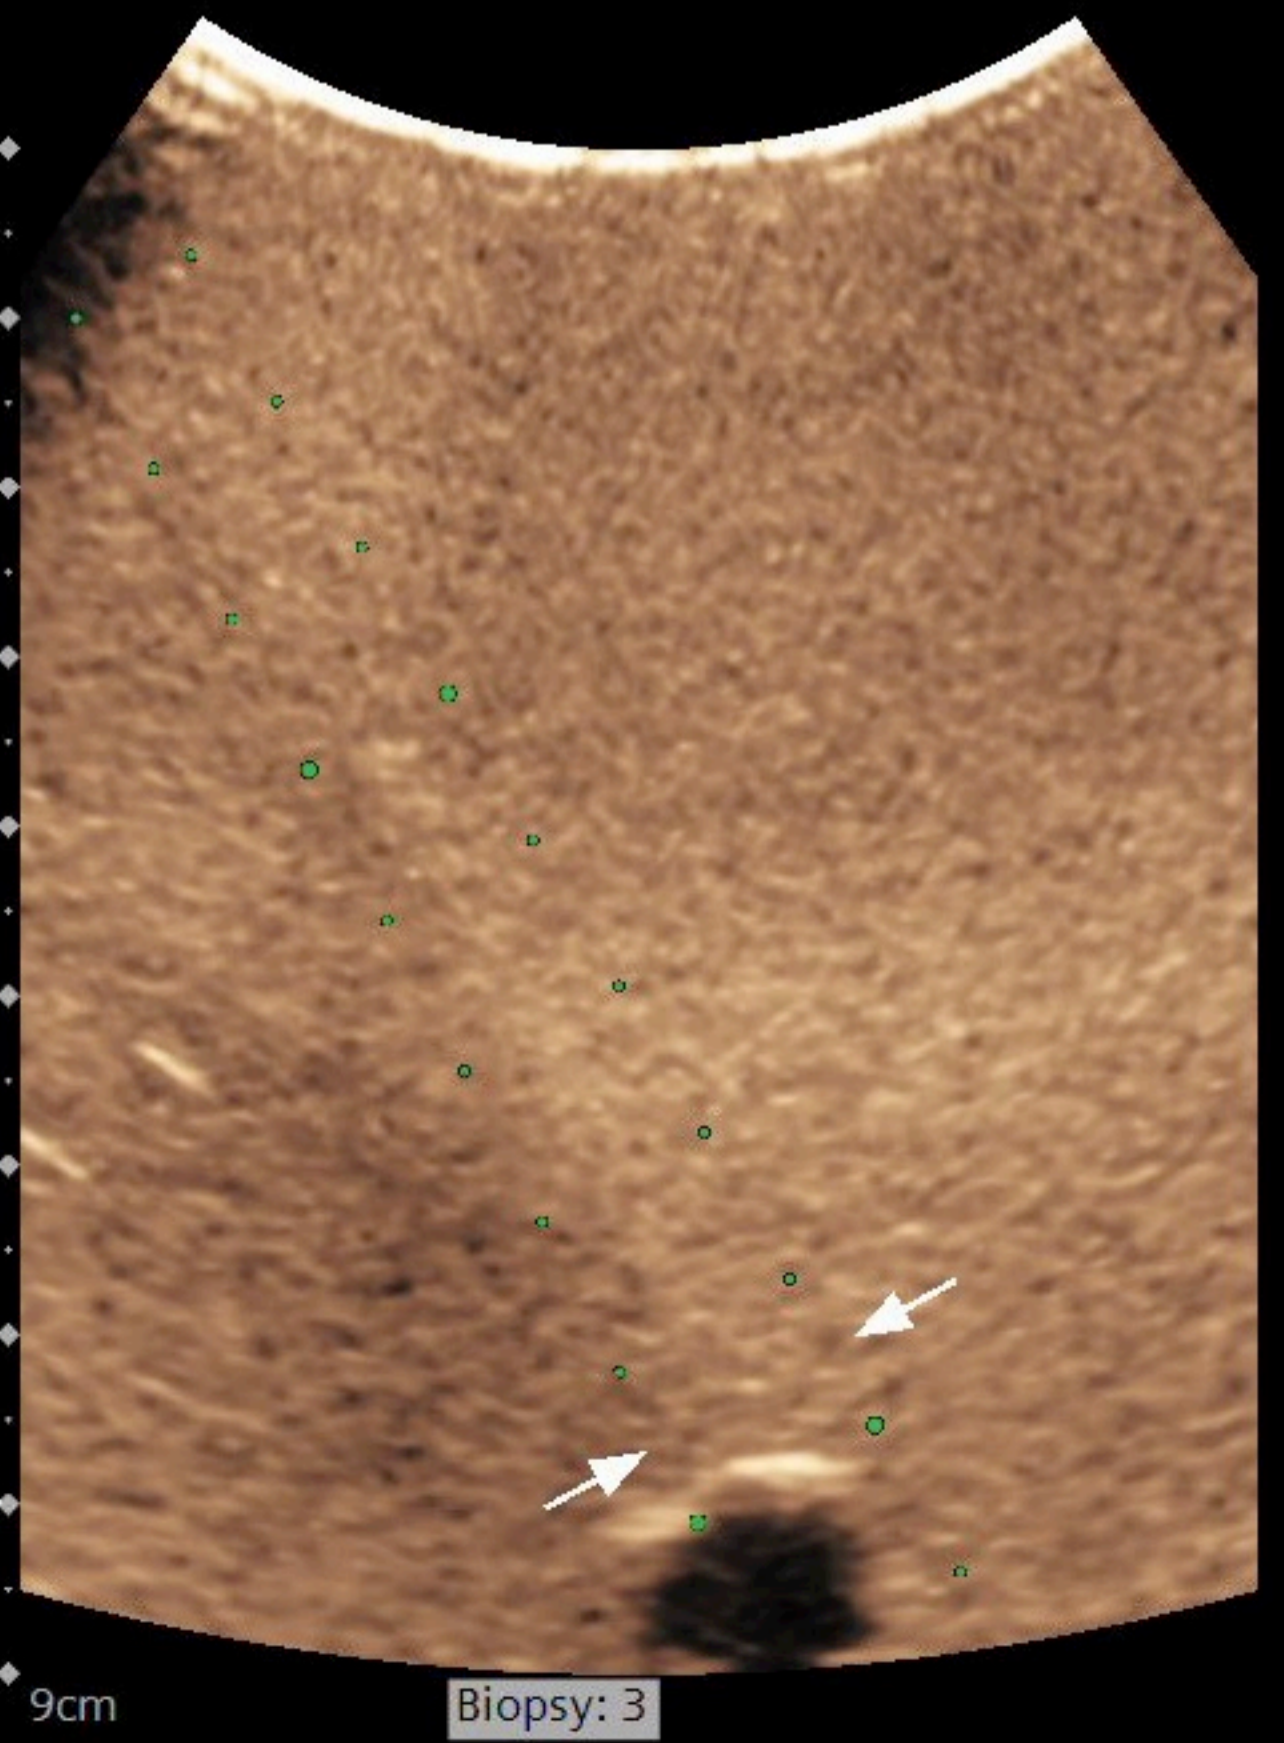

3rd puncture

Ultrasound contrast agent

Control



Introducer needle (set 10/10)

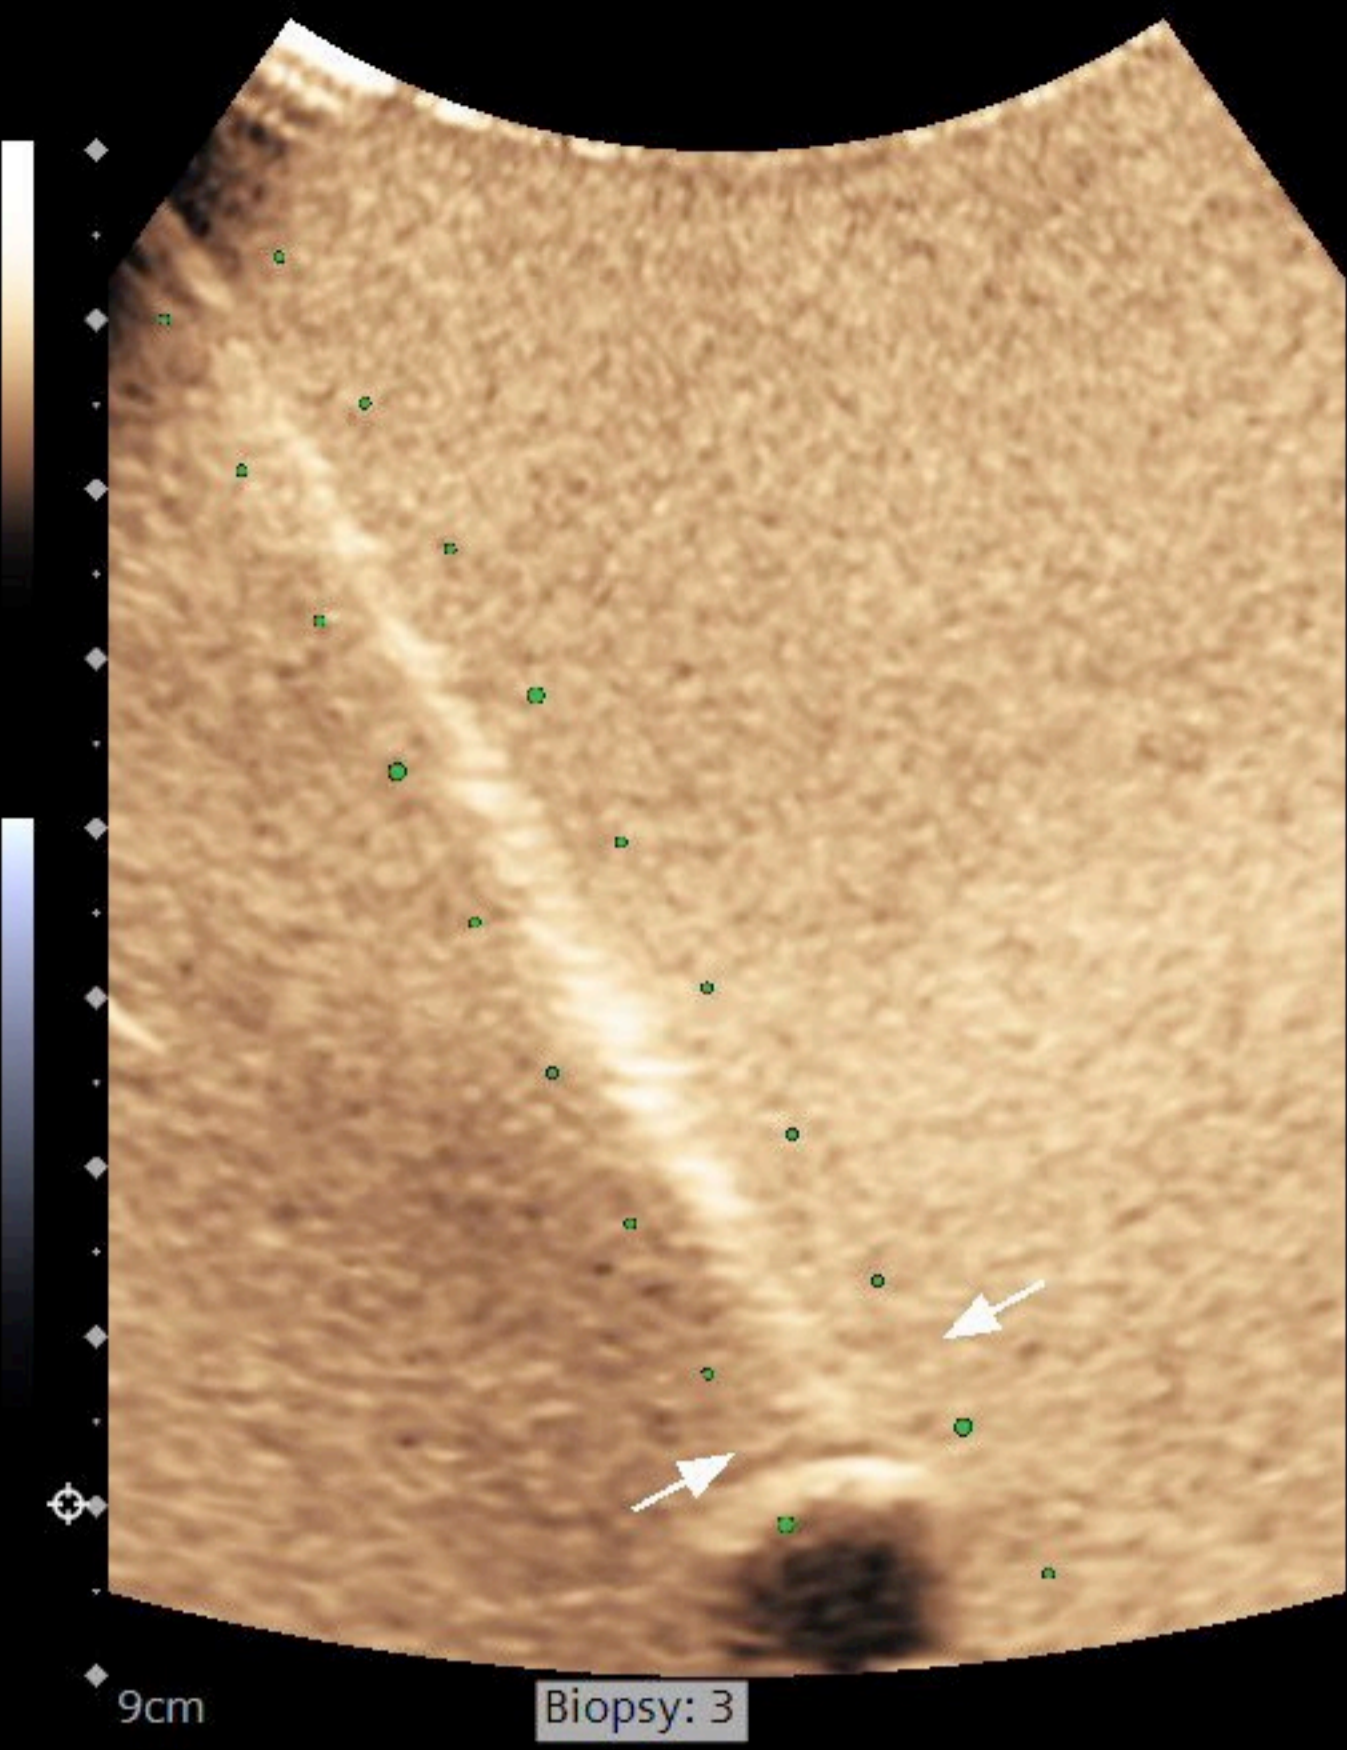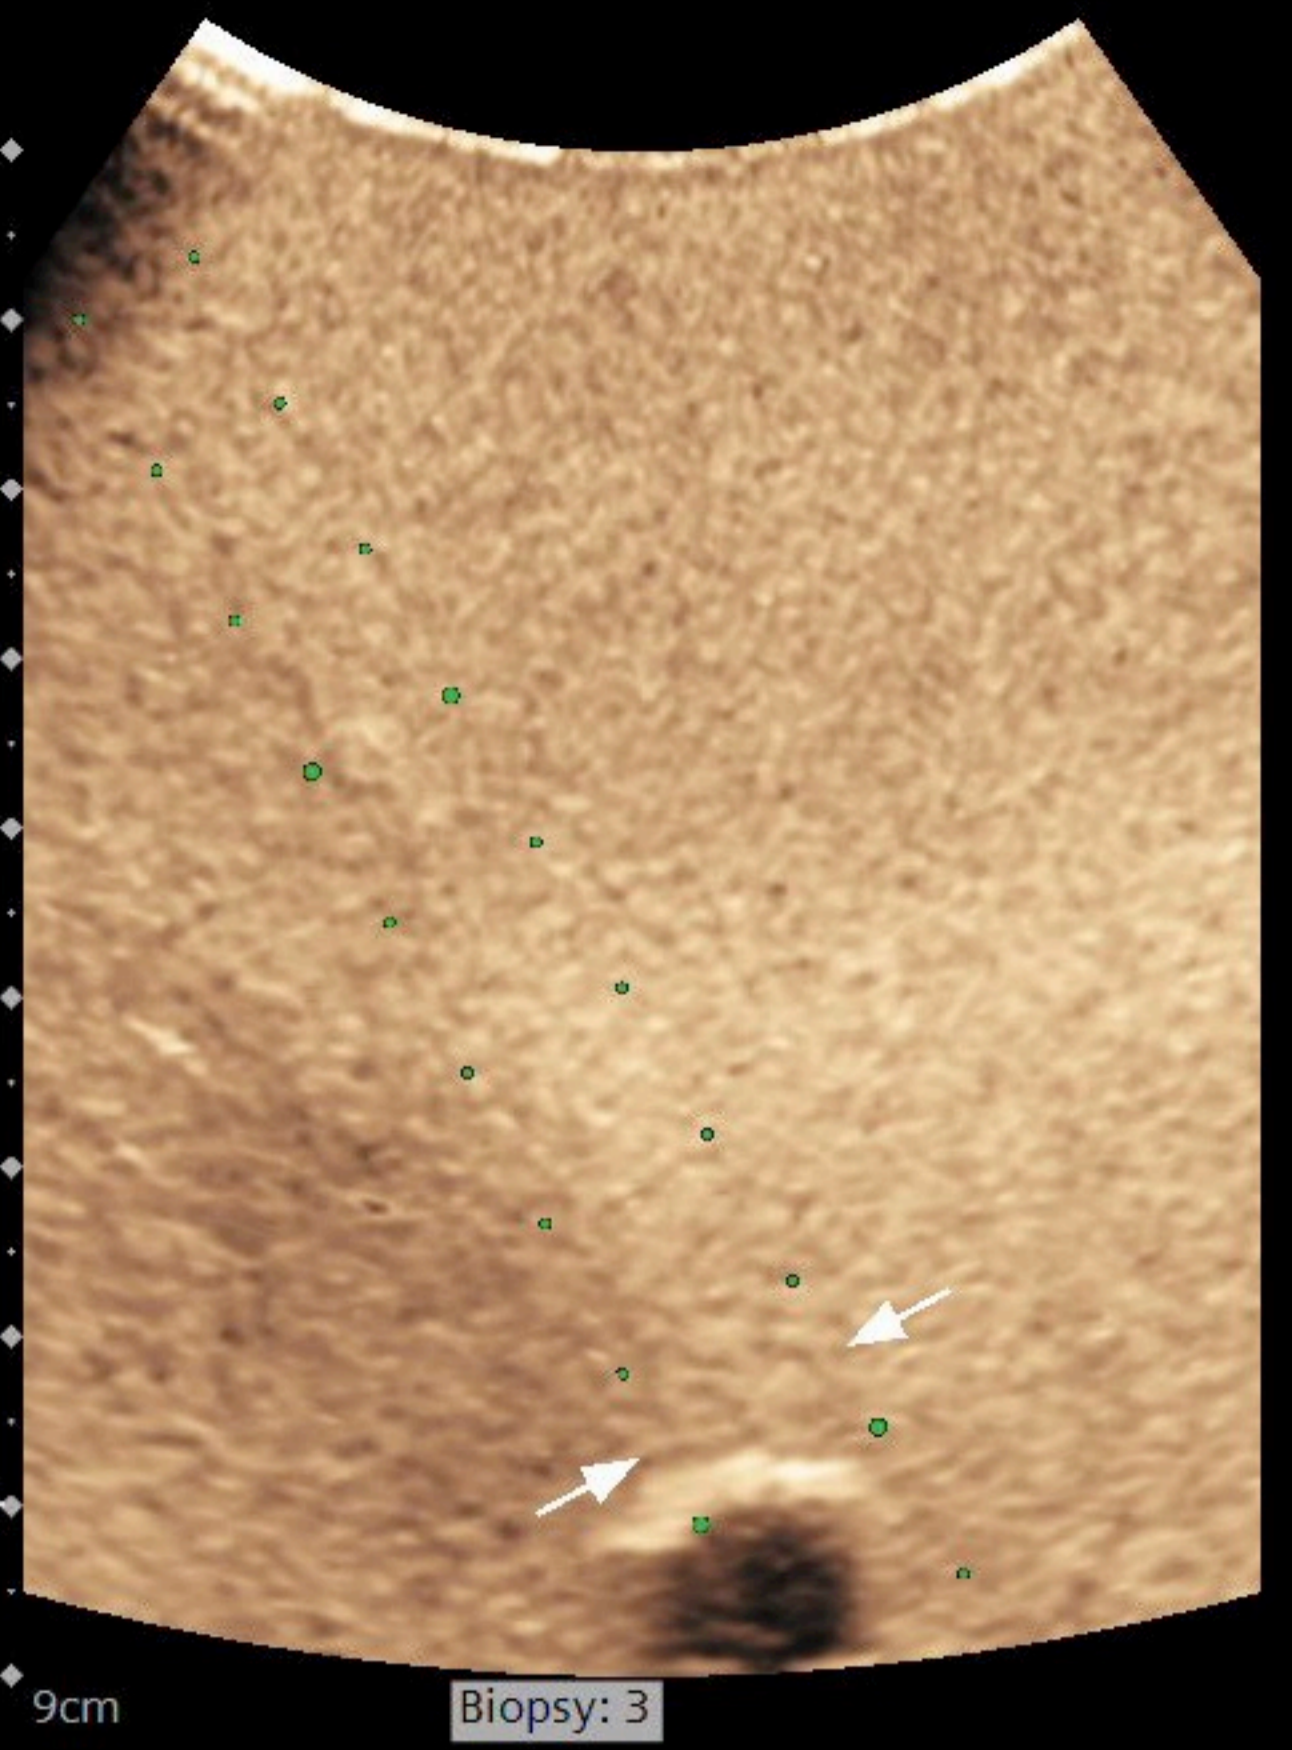

1st puncture

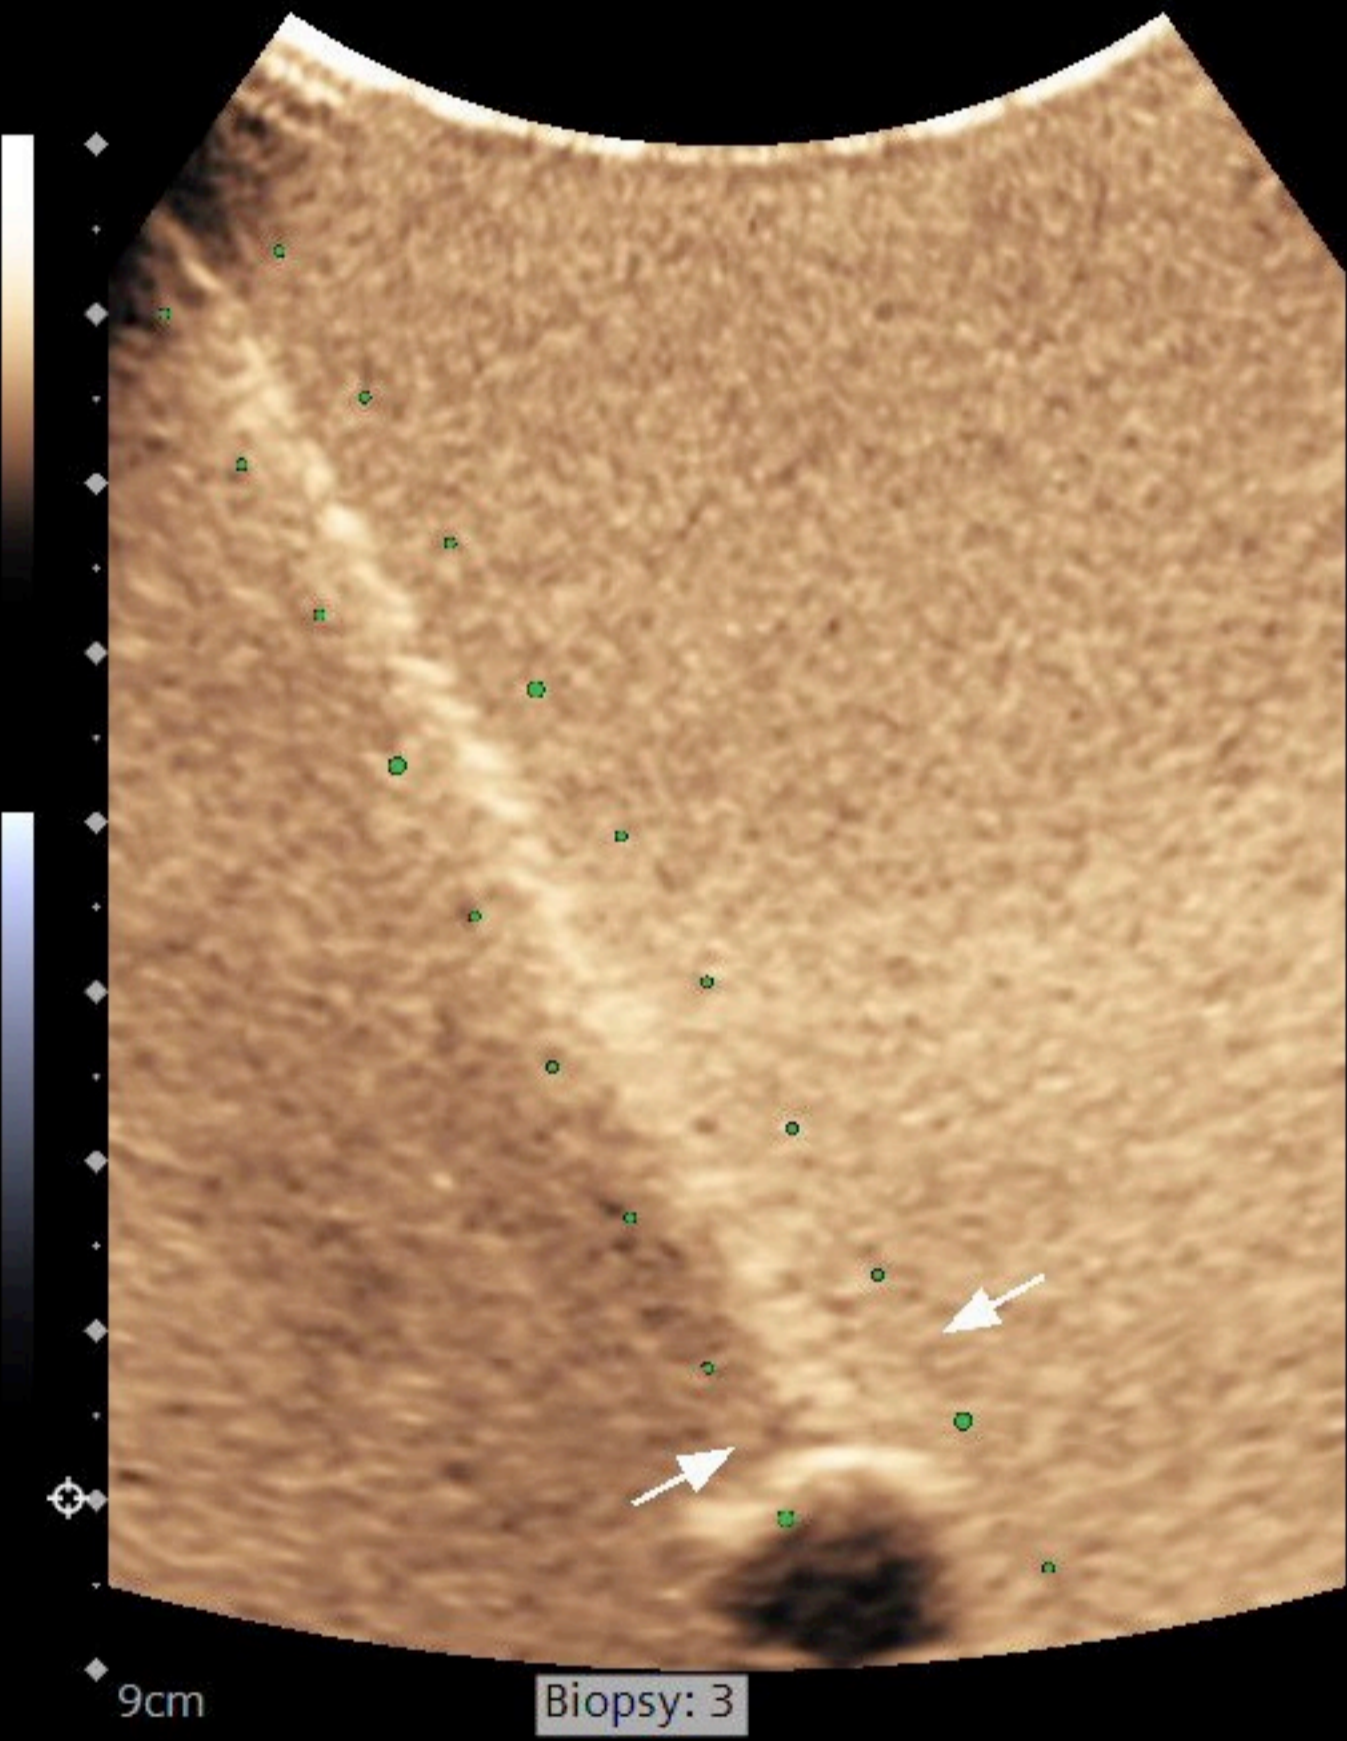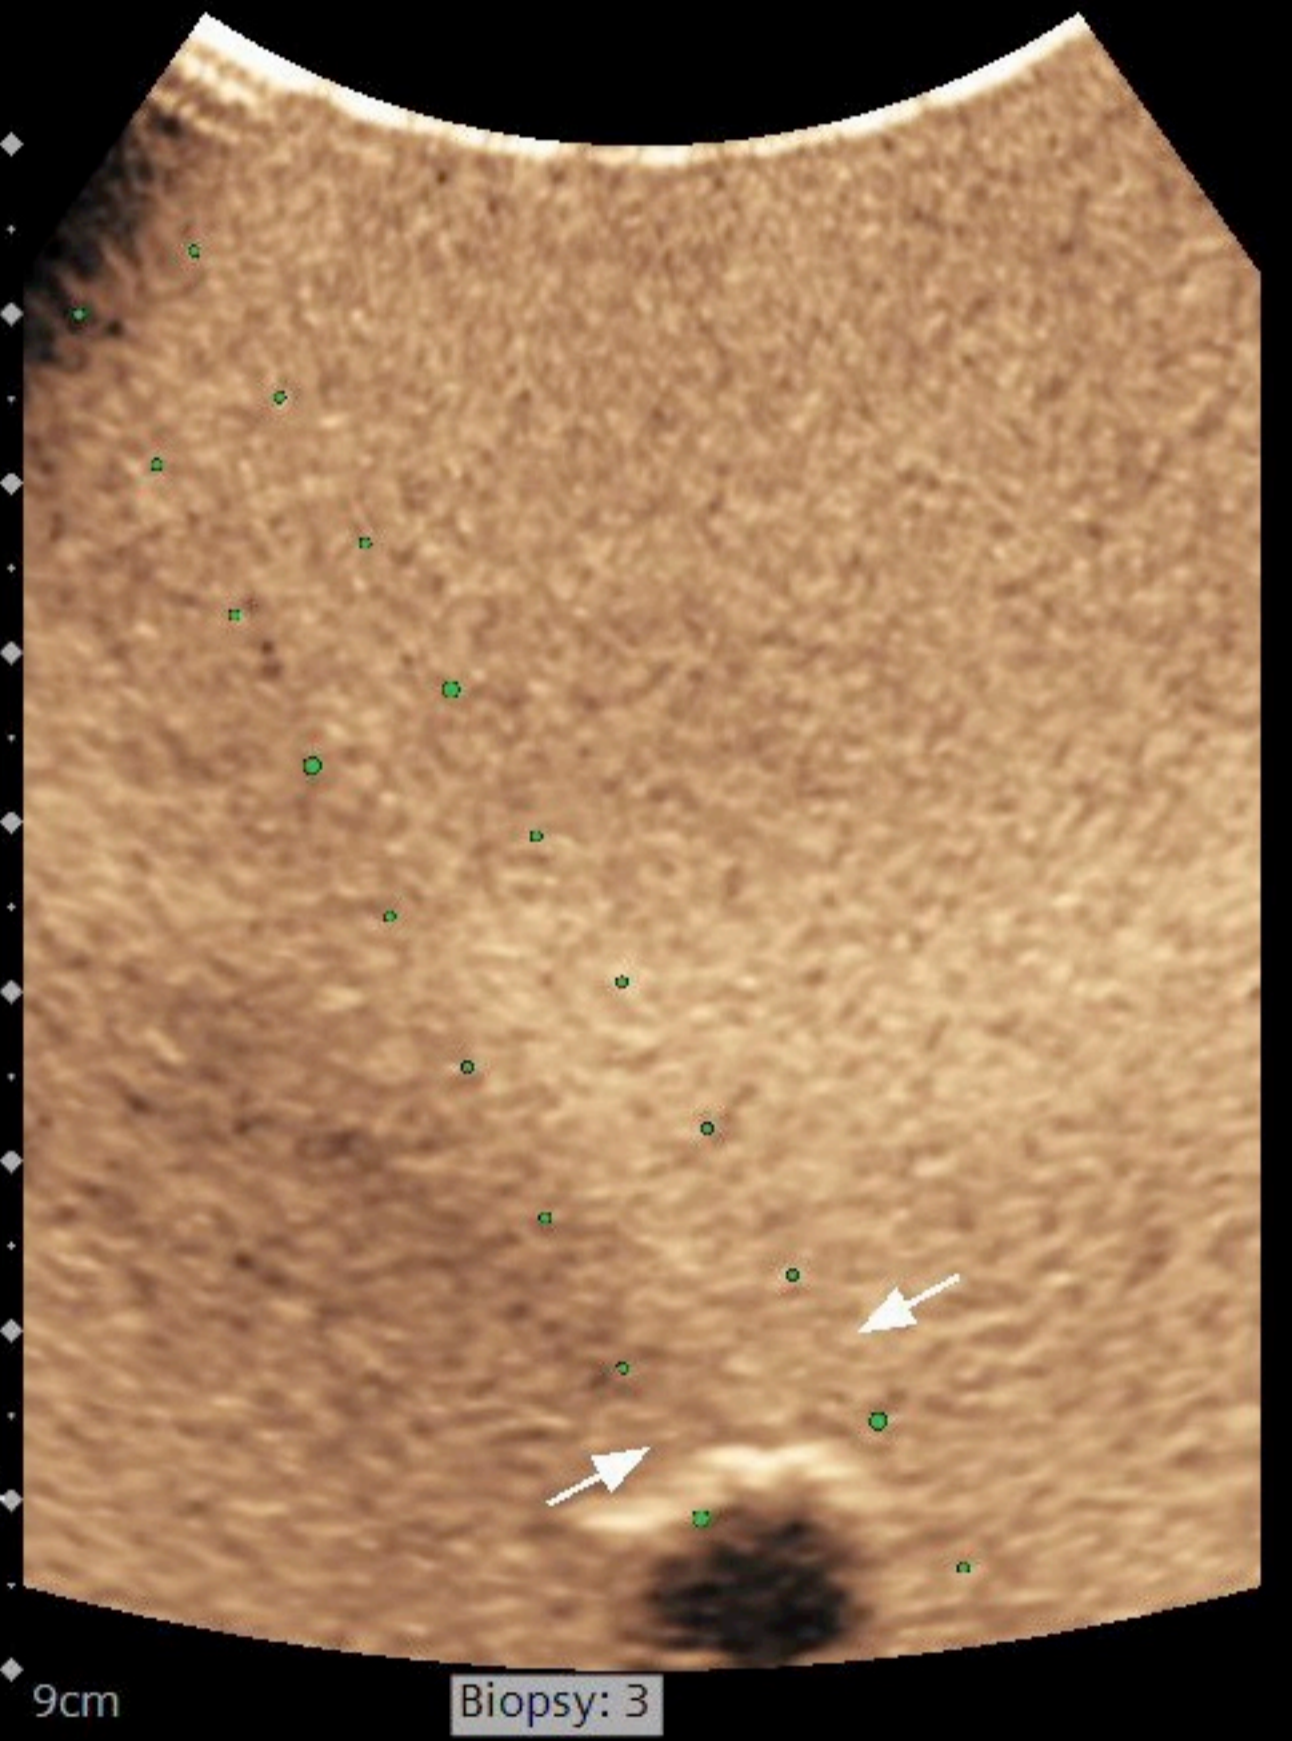

2nd puncture

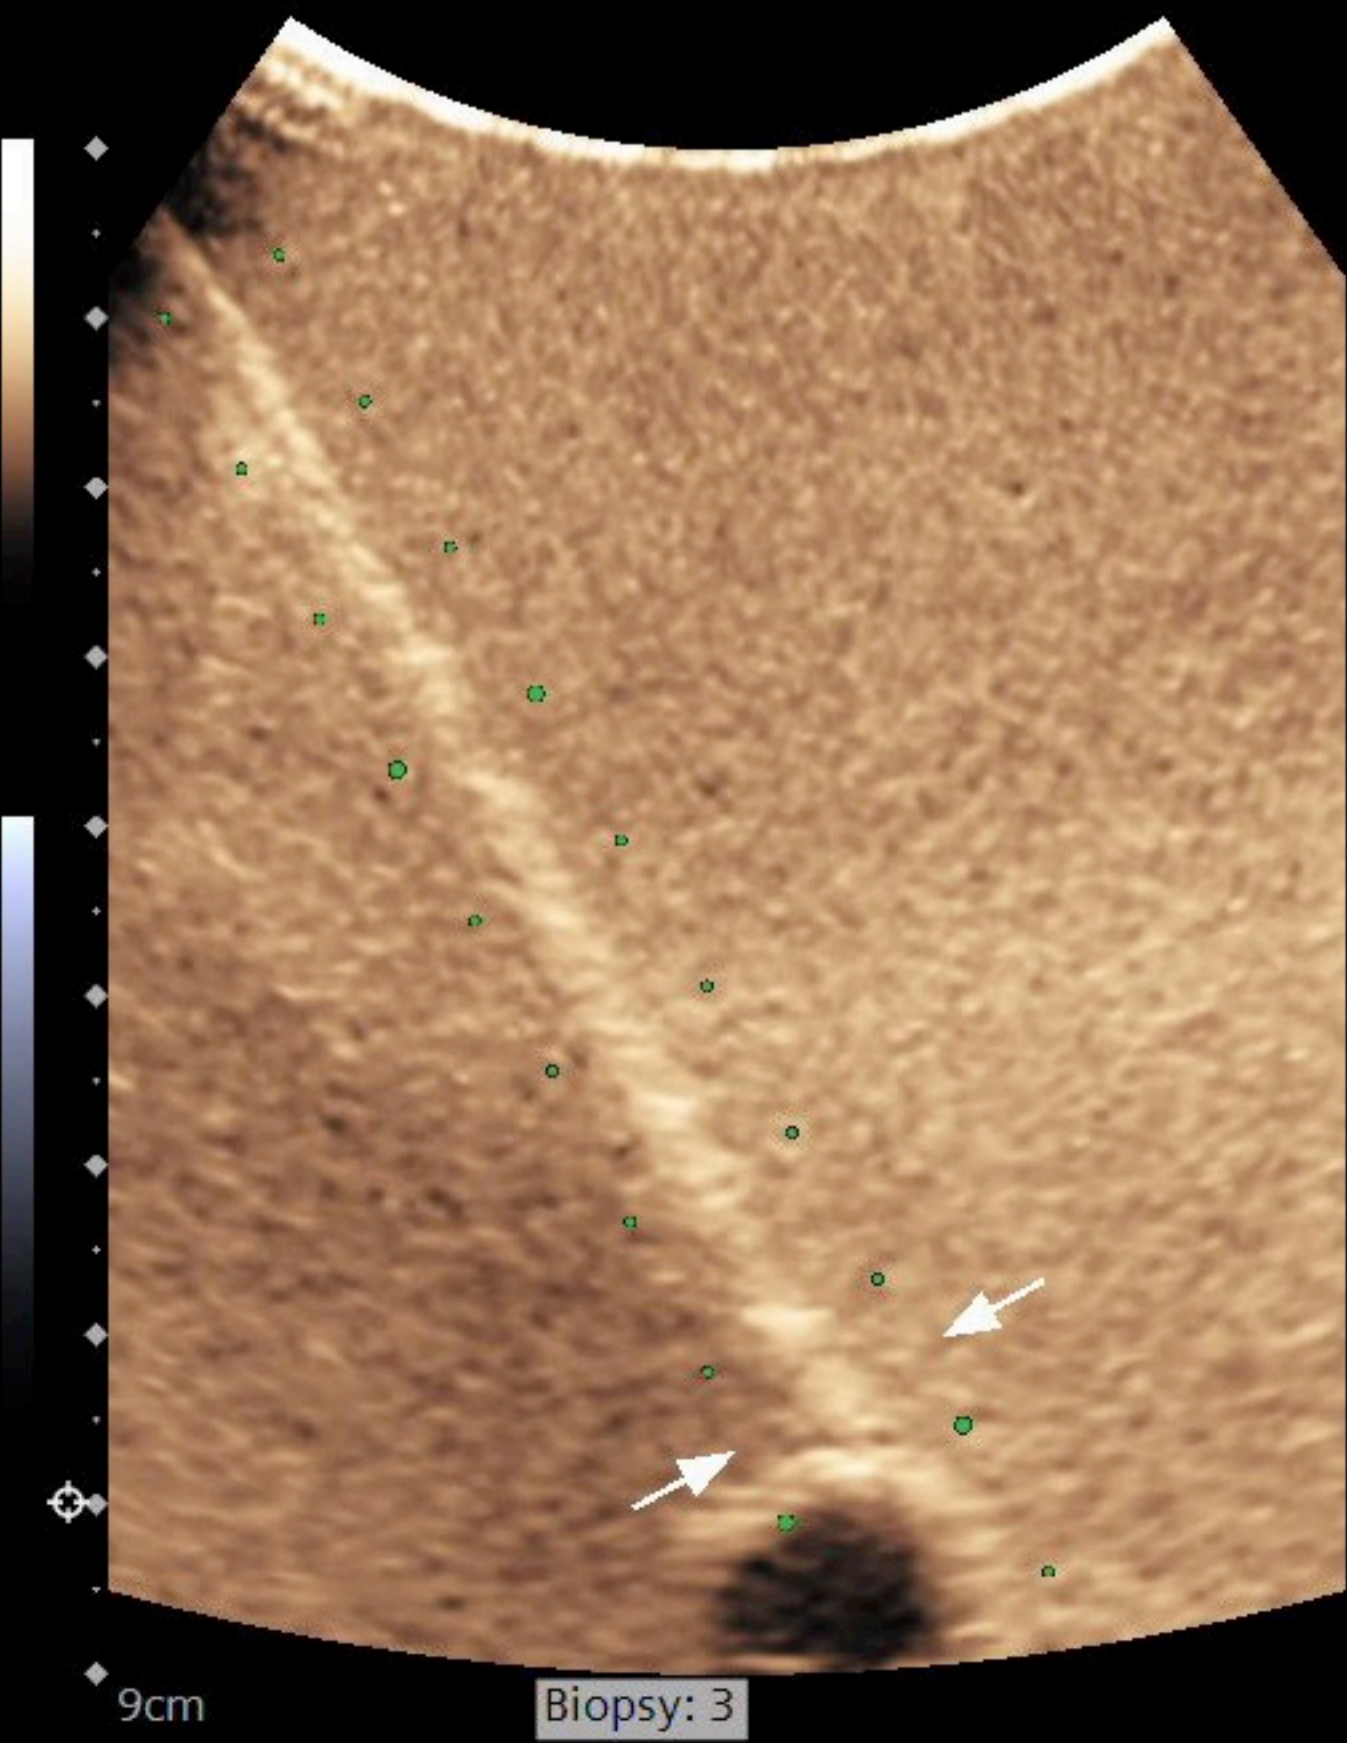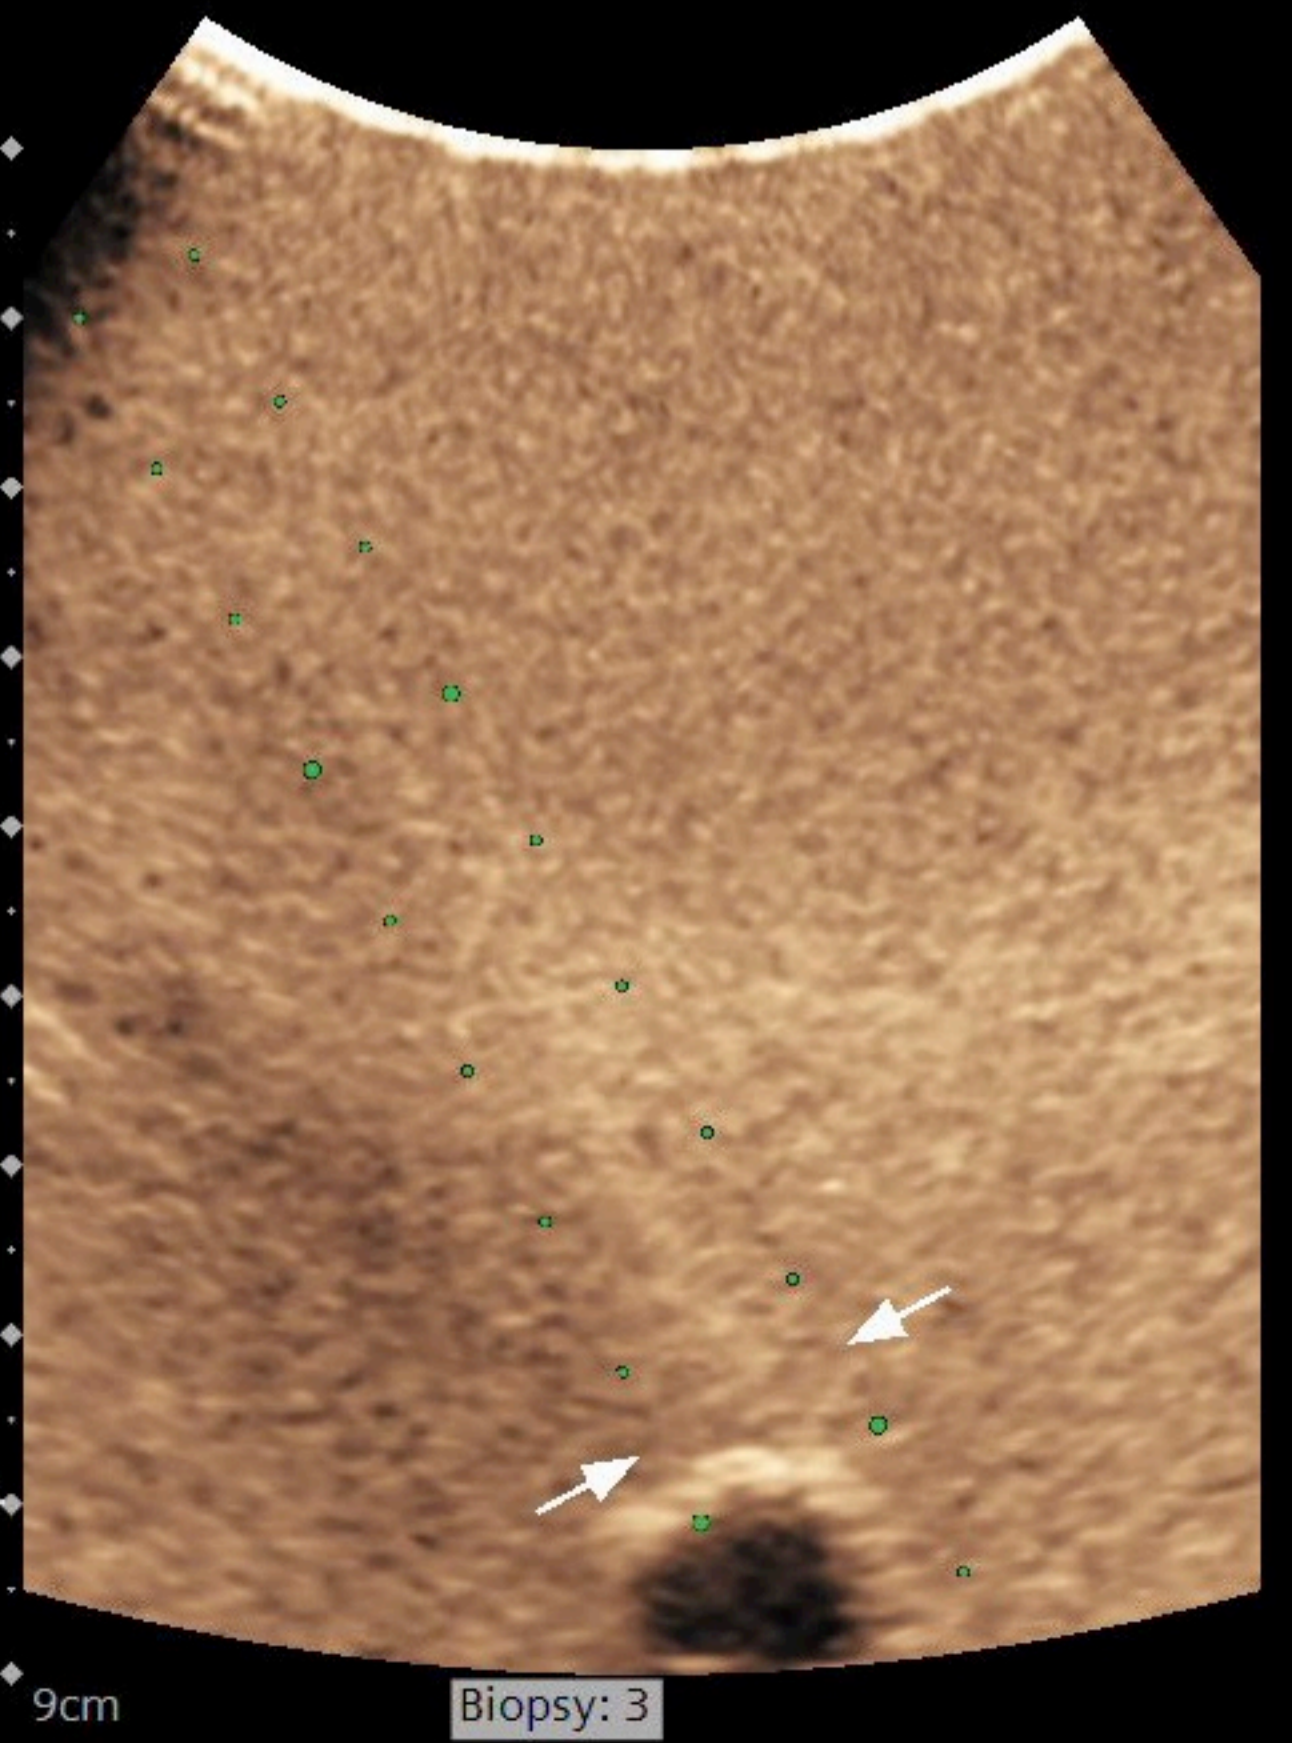

3rd puncture

Ultrasound contrast agent

Control
